# Supplementary material for: RefSeq Functional Elements as experimentally assayed nongenic reference standards and functional interactions in human and mouse
Source: HighWire-hosted journal article supplement (doi:10.1101/gr.275819.121), 2021-12-07
Supplement: Supplemental_Table_S1.xlsx [file Supplemental_Table_S1.xlsx]

## Sheet: RefSeqFE_URLs
Supplemental Table S1. Website links for RefSeq Functional Element information and data access.
Description	URL
RefSeq Functional Elements webpage	https://www.ncbi.nlm.nih.gov/refseq/functionalelements/
General information on RefSeq Functional Element records and feature annotation	https://www.ncbi.nlm.nih.gov/refseq/functionalelements/#Functional_Element_RefSeq_Records
Interaction data descriptions and access	https://www.ncbi.nlm.nih.gov/refseq/functionalelements/#Interactions
NCBI Insights blog posts relevant to RefSeq Functional Elements	https://ncbiinsights.ncbi.nlm.nih.gov/tag/refseq-functional-elements/
RefSeq Functional Element data access
RefSeq accession access:
NCBI Nucleotide database	https://www.ncbi.nlm.nih.gov/nuccore/
RefSeq Functional Element example queries	https://www.ncbi.nlm.nih.gov/refseq/functionalelements/#Access_via_Nucleotide
Biological region record access:
NCBI Gene database	https://www.ncbi.nlm.nih.gov/gene/
Biological region example queries	https://www.ncbi.nlm.nih.gov/refseq/functionalelements/#Access_via_Gene
NCBI graphical display access:
RefSeq Functional Element graphical displays information	https://www.ncbi.nlm.nih.gov/refseq/functionalelements/#Access_via_NCBI_Graphical_Displays
NCBI Genome Data Viewer	https://www.ncbi.nlm.nih.gov/genome/gdv/
NCBI Variation Viewer	https://www.ncbi.nlm.nih.gov/variation/view/
Track hub access:
RefSeqFE Hub connection URL	https://ftp.ncbi.nlm.nih.gov/refseq/FunctionalElements/trackhub/hub.txt
RefSeqFE Hub overview document	https://ftp.ncbi.nlm.nih.gov/refseq/FunctionalElements/trackhub/RefSeqFE_Hub.html
Track-specific HTML documents	https://ftp.ncbi.nlm.nih.gov/refseq/FunctionalElements/trackhub/hg38/
Additional track hub documentation	https://www.ncbi.nlm.nih.gov/refseq/functionalelements/#Access_via_Track_Hub
FTP data access:
RefSeq accessions in GenBank flat file and FASTA formats:
Human and mouse	https://ftp.ncbi.nlm.nih.gov/refseq/FunctionalElements/
Human only	https://ftp.ncbi.nlm.nih.gov/refseq/H_sapiens/biological_region/
Mouse only	https://ftp.ncbi.nlm.nih.gov/refseq/M_musculus/biological_region/
Genome-annotated data in GFF3 format, including annotation release documentation:
Human latest annotation release	https://ftp.ncbi.nlm.nih.gov/genomes/refseq/vertebrate_mammalian/Homo_sapiens/latest_assembly_versions/
Mouse latest annotation release	https://ftp.ncbi.nlm.nih.gov/genomes/refseq/vertebrate_mammalian/Mus_musculus/latest_assembly_versions/
Genome-annotated and interaction data in bigBed and bigInteract formats:
bigBed and bigInteract file descriptions	https://www.ncbi.nlm.nih.gov/refseq/functionalelements/#bigBed
Human data	https://ftp.ncbi.nlm.nih.gov/refseq/FunctionalElements/trackhub/data/human/
" " (alternative path)	https://ftp.ncbi.nlm.nih.gov/refseq/H_sapiens/biological_region/human_data/
Mouse data	https://ftp.ncbi.nlm.nih.gov/refseq/FunctionalElements/trackhub/data/mouse/
" " (alternative path)	https://ftp.ncbi.nlm.nih.gov/refseq/M_musculus/biological_region/mouse_data/
Gene FTP data, including various metadata files	https://ftp.ncbi.nih.gov/gene/DATA/
RefSeq Functional Element data parsing:
FTP file data extraction examples	https://www.ncbi.nlm.nih.gov/refseq/functionalelements/#Feat_extraction
Feature table with INSDC, SO and GFF3 file markup mapping	https://www.ncbi.nlm.nih.gov/refseq/functionalelements/#Feature_table
BLAST access	https://www.ncbi.nlm.nih.gov/refseq/functionalelements/#Access_via_BLAST
BioProject access	https://www.ncbi.nlm.nih.gov/refseq/functionalelements/#Access_via_BioProject
NCBI Eukaryotic Genome Annotation Pipeline documentation:
Eukaryotic Genome Annotation Pipeline webpage	https://www.ncbi.nlm.nih.gov/genome/annotation_euk/
Eukaryotic Genome Annotation Pipeline NCBI Handbook document	https://www.ncbi.nlm.nih.gov/books/NBK169439/
NCBI Gene database help document	https://www.ncbi.nlm.nih.gov/books/NBK3841/#EntrezGene.Quick_Start
Clinically relevant loci:
RefSeqGene genes	https://ftp.ncbi.nih.gov/refseq/H_sapiens/RefSeqGene/gene_RefSeqGene
Locus Reference Genomic (LRG) genes	https://www.lrg-sequence.org/data/
ClinVar submissions gene summary file	https://ftp.ncbi.nlm.nih.gov/pub/clinvar/tab_delimited/gene_specific_summary.txt
Biological regions in Gene database associated with variants in ClinVar	https://www.ncbi.nlm.nih.gov/gene/?term=gene_clinvar%5Bfilter%5D+AND+genetype+biological+region%5Bproperties%5D
