# Supplementary material for: RefSeq Functional Elements as experimentally assayed nongenic reference standards and functional interactions in human and mouse
Source: HighWire-hosted journal article supplement (doi:10.1101/gr.275819.121), 2021-12-07
Supplement: Supplemental_Table_S2.xlsx [file Supplemental_Table_S2.xlsx]

## Sheet: S2A_RefSeqFE_feats&stats
Supplemental Table S2A. RefSeq Functional Element feature types and statistics from human AR 109.20201120 and mouse AR 109.
Feature type1	General class/category2	Hs count3	Hs feature %4	Hs min length5	Hs max length6	Hs av length7	Hs StdDev8	Mm count9	Mm feature %10	Mm min length11	Mm max length12	Mm av length13	Mm StdDev14
CAAT_signal	regulatory class	5	0.0506997	5	5	5	0	5	0.220167	5	6	5	0.547723
CAGE_cluster	other types	93	0.943014	70	714	359.387	170.868	0	0	n/a	n/a	0	n/a
DNAseI_hypersensitive_site	regulatory class	171	1.73393	150	20291	1007.11	1814.77	118	5.19595	209	2446	795	357.104
GC_rich_promoter_region	regulatory class	15	0.152099	6	10	9.73333	1.0328	0	0	n/a	n/a	0	n/a
TATA_box	regulatory class	30	0.304198	5	12	6.36667	1.49674	14	0.616469	5	15	7	2.58482
TSS	other types	0	0	n/a	n/a	n/a	n/a	3	0.1321	1	1	1	0
chromosome_breakpoint	recombination class	6	0.0608396	2	2	2	0	0	0	n/a	n/a	n/a	n/a
conserved_region	other types	136	1.37903	19	1826	246.706	285.526	80	3.52268	6	1001	190	174.34
direct_repeat	other types	20	0.202799	35	417	303	120.684	0	0	n/a	n/a	n/a	n/a
dispersed_repeat	other types	5	0.0506997	17	17	17	0	0	0	n/a	n/a	n/a	n/a
enhancer	regulatory class	3781	38.3391	9	18796	868.563	1176.71	1016	44.738	6	12031	1852	1389.08
enhancer_blocking_element	regulatory class	56	0.567836	32	2654	691.929	591.797	7	0.308234	72	2586	987	910.729
epigenetically_modified_region	regulatory class	12	0.121679	8	739	380.167	242.856	0	0	n/a	n/a	n/a	n/a
imprinting_control_region	regulatory class	2	0.0202799	4765	4765	4765	0	1	0.0440335	2586	2586	2586	0
insulator	regulatory class	9	0.0912594	238	6000	1693.33	1797.94	0	0	n/a	n/a	n/a	n/a
locus_control_region	regulatory class	14	0.141959	843	65047	14574.8	18220.9	5	0.220167	388	24764	9921	11429.9
matrix_attachment_site	regulatory class	14	0.141959	400	3756	1437.07	1055.09	4	0.176134	100	3691	1527	1588.96
meiotic_recombination_region	recombination class	361	3.66052	67	14263	2206.39	1570.2	0	0	n/a	n/a	n/a	n/a
microsatellite	other types	5	0.0506997	63	133	96.6	29.6024	0	0	n/a	n/a	n/a	n/a
minisatellite	other types	12	0.121679	307	2818	1485.33	1049.41	0	0	n/a	n/a	n/a	n/a
mitotic_recombination_region	recombination class	54	0.547556	1	141940	11899.1	32567.1	0	0	n/a	n/a	n/a	n/a
mobile_genetic_element	other types	188	1.90631	61	8283	911.463	1569.22	5	0.220167	138	489	266	157.12
non_allelic_homologous_recombination_region	recombination class	492	4.98885	1	46326	1916.84	6117.1	0	0	n/a	n/a	n/a	n/a
nucleotide_cleavage_site	other types	4	0.0405597	2	2	2	0	0	0	n/a	n/a	n/a	n/a
nucleotide_motif	other types	621	6.2969	6	160	15.3849	8.60055	11	0.484368	6	297	34	87.2342
origin_of_replication	other types	92	0.932874	20	5083	831.098	1100.02	10	0.440335	146	3993	1375	1633.7
promoter	regulatory class	417	4.22835	11	16772	1207.18	1598.77	138	6.07662	81	9278	1431	1693.04
protein_binding_site	protein binding site	1379	13.983	5	299	28.8978	20.475	690	30.3831	5	356	35	34.3836
recombination_feature	recombination class	13	0.131819	2	6109	1237.46	1761.09	0	0	n/a	n/a	n/a	n/a
region	other types	4	0.0405597	16	26	23.5	5	0	0	n/a	n/a	n/a	n/a
regulatory_region	regulatory class	1	0.0101399	901	901	901	0	0	0	n/a	n/a	n/a	n/a
repeat_instability_region	other types	61	0.618536	15	3469	458.492	888.193	0	0	n/a	n/a	n/a	n/a
repeat_region	other types	6	0.0608396	14	505	149.167	204.058	0	0	n/a	n/a	n/a	n/a
replication_regulatory_region	regulatory class	11	0.111539	45	2655	598.636	749.472	1	0.0440335	114	114	114	0
replication_start_site	other types	3	0.0304198	1	1	1	0	0	0	n/a	n/a	n/a	n/a
response_element	regulatory class	19	0.192659	8	202	41.1579	47.4731	6	0.264201	20	52	28	12.0775
sequence_alteration	other types	27	0.273778	1	43	2.55556	8.0829	0	0	n/a	n/a	n/a	n/a
sequence_comparison	other types	1	0.0101399	1	1	1	0	0	0	n/a	n/a	n/a	n/a
sequence_feature	other types	2	0.0202799	1	1	1	0	0	0	n/a	n/a	n/a	n/a
sequence_secondary_structure	other types	13	0.131819	13	2419	362	687.769	0	0	n/a	n/a	n/a	n/a
silencer	regulatory class	319	3.23464	15	4751	393.072	489.632	15	0.660502	23	1420	406	406.335
tandem_repeat	other types	64	0.648956	26	2145	197.578	420.601	0	0	n/a	n/a	n/a	n/a
transcriptional_cis_regulatory_region	regulatory class	1324	13.4253	1	5411	364.929	438.527	142	6.25275	1	32327	1788	4596.98
OVERALL		9862	100	1	141940	781	3187.83	2271	100	1	32327	1125	1862.81
Features grouped by class:
all regulatory class features	regulatory class	6200	62.8676	1	65047	785.336	1540.57	1472	64.8173	1	32327	1697.68	2094.95
protein_binding_site features	protein binding site	1379	13.983	5	299	28.8978	20.475	690	30.3831	5	356	34.9899	34.3836
all recombination class features	recombination class	926	9.38958	1	141940	2589.9	9330.55	n/a	n/a	n/a	n/a	n/a	n/a
all other feature types	other types	1357	13.7599	1	8283	291.222	783.161	109	4.79965	1	3993	281.165	609.656
OVERALL		9862	100	1	141940	781.01	3187.83	2271	100	1	32327	1124.52	1862.81
Biological regions:
biological_region	parental region	4450	n/a	2	144012	1318.7	4420.03	889	n/a	29	38800	2717.03	3176.67
1Features derived from GFF3 files and displayed as SO_type terms (GFF3 column 3)
2General feature grouping according to INSDC feature class or category, as used in Figure 4 and Supplemental Figures S3-S5.
3Feature counts derived from the human AR 109.20201120 GFF3 file at https://ftp.ncbi.nih.gov/genomes/refseq/vertebrate_mammalian/Homo_sapiens/annotation_releases/109.20201120/GCF_000001405.39_GRCh38.p13/GCF_000001405.39_GRCh38.p13_genomic.gff.gz
4Percentage of total Functional Element features from human AR 109.20201120
5Minimum feature length for human AR 109.20201120
6Maximum feature length for human AR 109.20201120
7Average feature length for human AR 109.20201120
8Feature length standard deviation from the mean for human AR 109.20201120
9Feature counts derived from the mouse AR 109 GFF3 file at https://ftp.ncbi.nih.gov/genomes/refseq/vertebrate_mammalian/Mus_musculus/annotation_releases/109/GCF_000001635.27_GRCm39/GCF_000001635.27_GRCm39_genomic.gff.gz
10Percentage of total Functional Element features from mouse AR 109
11Minimum feature length for mouse AR 109
12Maximum feature length for mouse AR 109
13Average feature length for mouse AR 109
14Feature length standard deviation from the mean for mouse AR 109

## Sheet: S2B_feature_definitions
Supplemental Table S2B. Current RefSeq Functional Element feature types with SO IDs, INSDC feature keys and classes, definitions from INSDC or SO and RefSeq Functional Element annotation policies.
SO feature type1	SO ID2	INSDC feature key3	INSDC class or type4	INSDC or SO definition5	RefSeq Functional Elements annotation policy6
CAAT_signal	SO:0000172	regulatory	regulatory_class=CAAT_signal	INSDC: CAAT box; part of a conserved sequence located about 75 bp upstream of the start point of eukaryotic transcription units which may be involved in RNA polymerase binding; consensus=GG(C or T)CAATCT [1,2]. References: [1] Efstratiadis, A. et al. Cell 21, 653-668 (1980); [2] Nevins, J.R. "The pathway of eukaryotic mRNA formation" Ann Rev Biochem 52, 441-466 (1983).	Used for CAAT boxes that are experimentally verified by a genetic manipulation assay or when described in a publication as a significant genomic landmark. The annotated range represents the exact fragment (or reference allele equivalent) assayed in the supporting publication(s) or the core motif asserted by the authors.
CAGE_cluster	SO:0001917	misc_feature		SO: A kind of transcription_initiation_cluster defined by the clustering of CAGE tags on a sequence region.	Limited use to indicate balanced bidirectional CAGE regions on a subset of transcribed enhancers from the FANTOM5 project that were further validated as active enhancers by reporter assays. Annotated ranges represent the CAGE cluster regions provided in Andersson et al. 2014, PMID:24670763.
DNAseI_hypersensitive_site	SO:0000685	regulatory	regulatory_class=DNase_I_hypersensitive_site	INSDC: DNA region representing open chromatin structure that is hypersensitive to digestion by DNase I.	Limited use for DNase I hypersensitive sites (DHSs) that are described/named in the literature, are considered regional landmarks, and/or are clinically significant. The annotated range is based on experimental evidence in the supporting publication(s), which may include traditional Southern blot mapping, qPCR techniques or data from large-scale resources (e.g., ENCODE) when there is additional a…
GC_rich_promoter_region	SO:0000173	regulatory	regulatory_class=GC_signal	INSDC: GC box; a conserved GC-rich region located upstream of the start point of eukaryotic transcription units and which may occur in multiple copies or in either orientation; consensus=GGGCGG.	Used for GC boxes that are experimentally verified by a genetic manipulation assay or when described in a publication as a significant genomic landmark. The annotated range represents the exact fragment (or reference allele equivalent) assayed in the supporting publication(s) or the core motif asserted by the authors.
TATA_box	SO:0000174	regulatory	regulatory_class=TATA_box	INSDC: Goldberg-Hogness box; a conserved AT-rich septamer found about 25 bp before the start point of some eukaryotic RNA polymerase II transcript unit which may be involved in positioning the enzyme for correct initiation; consensus=TATA(A or T)A(A or T) [1,2]. References: [1] Efstratiadis, A. et al. Cell 21, 653-668 (1980); [2] Corden, J., et al. "Promoter sequences of eukaryotic protein-encodi…	Used for TATA boxes that are experimentally verified by a genetic manipulation assay or when described in a publication as a significant genomic landmark. The annotated range represents the exact fragment (or reference allele equivalent) assayed in the supporting publication(s) or the core motif asserted by the authors.
TSS	SO:0000315	misc_feature		SO: The first base where RNA polymerase begins to synthesize the RNA transcript.	Used rarely for annotating well-studied transcription start sites (TSSs) on promoters, as indicated as in a supporting publication. A single base is annotated according to the start of the RefSeq transcript(s) for the given gene.
biological_region	SO:0001411	misc_feature		SO: A region defined by its disposition to be involved in a biological process.	Used as a parental feature spanning all underlying functional annotations on each RefSeq, denoted by '/note="Region: biological region"' in GenBank flat files. Spans continuously from the beginning of the first annotated functional feature to the end of the last annotated feature, or if only one underlying feature is annotated, the entire length of that feature.
chromosome_breakpoint	SO:0001021	misc_recomb	recombination_class=chromosome_breakpoint	INSDC: A chromosomal region that may sustain a double-strand break, resulting in a recombination event.	Used for well-characterized and/or clinically-significant chromosome breakpoints. The annotated range represents the 5'- to the 3'-most base of the breakpoint region mapped by experimental evidence in the supporting publication(s).
conserved_region	SO:0000330	misc_feature		SO: Region of sequence similarity by descent from a common ancestor.	Limited use for conserved regions considered to be functionally significant and/or which represent genomic landmarks for a region. The annotated range represents the 5'- to the 3'-most base of the conserved region shown by alignment or sequence similarity evidence in the supporting publication(s).
direct_repeat	SO:0000314	repeat_region	rpt_type=direct	INSDC: A repeat where the same sequence is repeated in the same direction.	Limited use for direct repeats that are described in the literature as being functionally significant and/or represent genomic landmarks for a region. The annotated range typically spans from the start of the 5'-most repeat to the end of the 3'-most repeat present in the reference genome assembly, as mapped in the supporting publication(s) and/or by repeat finding tools. An '/inference' qualifier…
dispersed_repeat	SO:0000658	repeat_region	rpt_type=dispersed	INSDC: A repeat that is located at dispersed sites in the genome.	Limited use for dispersed repeats that are described in the literature as being functionally significant and/or represent genomic landmarks for a region. The annotated range typically spans from the start of the 5'-most repeat to the end of the 3'-most repeat present in the reference genome assembly, as mapped in the supporting publication(s) and/or by repeat finding tools. An '/inference' qualif…
enhancer	SO:0000165	regulatory	regulatory_class=enhancer	INSDC: A cis-acting sequence that increases the utilization of (some) eukaryotic promoters, and can function in either orientation and in any location (upstream or downstream) relative to the promoter.	Used for enhancers shown to have experimentally verified activity by a genetic manipulation assay in a publication, including but not limited to evidence from reporter assays, transgenesis, knock-out, knock-in or other genome perturbation assays. The annotated range represents the exact fragment (or reference allele equivalent) assayed in the supporting publication(s).
enhancer_blocking_element	SO:0002190	regulatory	regulatory_class=enhancer_blocking_element	INSDC: A transcriptional cis regulatory region that when located between an enhancer and a gene's promoter prevents the enhancer from modulating the expression of the gene. Sometimes referred to as an insulator but may not include the barrier function of an insulator.	Used for enhancer-blocking elements shown to have experimentally verified activity by a genetic manipulation assay in a publication, including but not limited to evidence from reporter assays, transgenesis, knock-out, knock-in or other genome perturbation assays. The annotated range represents the exact fragment (or reference allele equivalent) assayed in the supporting publication(s).
epigenetically_modified_region	SO:0001720	regulatory	regulatory_class=other	SO: A biological DNA region implicated in epigenomic changes caused by mechanisms other than changes in the underlying DNA sequence. This includes, nucleosomal histone post-translational modifications, nucleosome depletion to render DNA accessible and post-replicational base modifications such as cytosine modification.	Limited use to indicate epigenetically modified regions on a subset of non-transcribed enhancers from the FANTOM5 project that were further validated as active enhancers by reporter assays. Annotated ranges represent the epigenetically modified regions provided in Andersson et al. 2014, PMID:24670763.
imprinting_control_region	SO:0002191	regulatory	regulatory_class=imprinting_control_region	INSDC: A regulatory region that controls epigenetic imprinting and affects the expression of target genes in an allele- or parent-of-origin-specific manner. Associated regulatory elements may include differentially methylated regions and non-coding RNAs.	Used for imprinting control regions shown to have experimentally verified activity by a genetic manipulation assay in a publication, including but not limited to evidence from reporter assays, transgenesis, knock-out, knock-in or other genome perturbation assays. The annotated range represents the exact fragment (or reference allele equivalent) assayed in the supporting publication(s).
insulator	SO:0000627	regulatory	regulatory_class=insulator	INSDC: A chromatin boundary element or barrier that can block the encroachment of condensed chromatin from an adjacent region. May also include enhancer-blocking activity.	Used for insulators shown to have experimentally verified activity by a genetic manipulation assay in a publication, including but not limited to evidence from reporter assays, transgenesis, knock-out, knock-in or other genome perturbation assays. The annotated range represents the exact fragment (or reference allele equivalent) assayed in the supporting publication(s).
locus_control_region	SO:0000037	regulatory	regulatory_class=locus_control_region	INSDC: A DNA region that includes DNase hypersensitive sites located 5' to a gene or gene cluster, and which confers high-level, position-independent, and copy number-dependent expression on that gene or gene cluster.	Used for locus control regions shown to have experimentally verified activity by a genetic manipulation assay in a publication, including but not limited to evidence from reporter assays, transgenesis, knock-out, knock-in or other genome perturbation assays. The annotated range represents the exact fragment (or reference allele equivalent) assayed in the supporting publication(s).
matrix_attachment_site	SO:0000036	regulatory	regulatory_class=matrix_attachment_region	INSDC: DNA region that is required for the binding of chromatin to the nuclear matrix.	Used for regions shown to associate with the nuclear matrix by an experiemental assay in a publication. The annotated range represents the exact fragment (or reference allele equivalent) assayed in the supporting publication(s).
meiotic_recombination_region	SO:0002155	misc_recomb	recombination_class=meiotic	INSDC: A genomic region in which there is an exchange of genetic material as a result of the repair of meiosis-specific double strand breaks that occur during meiotic prophase.	Used for well-characterized and/or clinically-significant meiotic recombination regions. The annotated range represents the 5'- to the 3'-most base of the recombination region mapped by experimental evidence in the supporting publication(s).
microsatellite	SO:0000289	repeat_region	satellite=microsatellite	SO: A repeat_region containing repeat_units of 2 to 10 bp repeated in tandem.	Limited use for microsatellite repeats that are described in the literature as being functionally significant and/or represent genomic landmarks for a region. The annotated range typically spans from the start of the 5'-most repeat to the end of the 3'-most repeat present in the reference genome assembly, as mapped in the supporting publication(s) and/or by repeat finding tools. An '/inference' q…
minisatellite	SO:0000643	repeat_region	satellite=minisatellite	SO: A repeat region containing tandemly repeated sequences having a unit length of 10 to 40 bp.	Limited use for minisatellite repeats that are described in the literature as being functionally significant and/or represent genomic landmarks for a region. The annotated range typically spans from the start of the 5'-most repeat to the end of the 3'-most repeat present in the reference genome assembly, as mapped in the supporting publication(s) and/or by repeat finding tools. An '/inference' qu…
mitotic_recombination_region	SO:0002154	misc_recomb	recombination_class=mitotic	INSDC: A genomic region where there is an exchange of genetic material with another genomic region, occurring in somatic cells.	Used for well-characterized and/or clinically-significant mitotic recombination regions. The annotated range represents the 5'- to the 3'-most base of the recombination region mapped by experimental evidence in the supporting publication(s).
mobile_genetic_element	SO:0001037		mobile_element	INSDC: Region of genome containing mobile elements.	Limited use for mobile genetic elements that are described in the literature as being functionally significant and/or represent genomic landmarks for a region. The annotated range spans the length of the mobile element, as mapped in the supporting publication(s) and/or by repeat finding tools. An '/inference' qualifier may be provided with a reference to a publicly accessible algorithm, e.g., Rep…
non_allelic_homologous_recombination_region	SO:0002094		recombination_class=non_allelic_homologous	INSDC: A genomic region at a non-allelic position where exchange of genetic material happens as a result of homologous recombination.	Used for well-characterized and/or clinically-significant non-alleleic homologous recombination regions. The annotated range represents the 5'- to the 3'-most base of the recombination region mapped by experimental evidence in the supporting publication(s).
nucleotide_cleavage_site	SO:0002204	misc_feature		SO: A point in nucleic acid where a cleavage event occurs.	Used for annotating well-defined cleavage sites when cleavage contributes to function, e.g., toponuclease cleavage at replication start sites. The annotated range represents the 5'- to the 3'-most base of the cleavage site as determined by experimental evidence in the supporting publication(s).
nucleotide_motif	SO:0000714	misc_feature		SO: A region of nucleotide sequence corresponding to a known motif.	Limited use for miscellaneous motifs that do not meet criteria for annotation as protein_bind, repeat_region or other feature types, and which have been asserted as being functionally important in a publication, e.g., PRDM9 motifs in meiotic recombination regions. The annotated range represents the 5'- to the 3'-most base of the motif as asserted in the supporting publication(s) and/or from a mot…
origin_of_replication	SO:0000296	rep_origin		INSDC: Origin of replication; starting site for duplication of nucleic acid to give two identical copies.	Used for active DNA replication origins that are well-supported and reproducibly observed in the literature. A '/direction' qualifier may be included when it is known that the origin fires in one or both directions. The annotated range represents the 5'- to the 3'-most base of the replication origin as mapped by experimental evidence in the supporting publication(s).
promoter	SO:0000167	regulatory	regulatory_class=promoter	INSDC: Region on a DNA molecule involved in RNA polymerase binding to initiate transcription.	Used for promoters shown to have experimentally verified activity by a genetic manipulation assay in a publication, including but not limited to evidence from reporter assays, transgenesis, knock-out, knock-in or other genome perturbation assays. The annotated range represents the exact fragment (or reference allele equivalent) assayed in the supporting publication(s).
protein_binding_site	SO:0000410	protein_bind		INSDC: Non-covalent protein binding site on nucleic acid.	Used where there is experimental evidence for direct protein binding to a DNA fragment, e.g., electrophoretic mobility shift assays, DNase I footprint evidence or chromatin immunoprecipitation (ChIP; typically with motif assertion or supporting genetic manipulation) for binding of a specific protein, family, or complex. The annotated range represents the exact fragment (or reference allele equiva…
recombination_feature	SO:0000298	misc_recomb	recombination_class=other	SO: A feature where there has been exchange of genetic material in the event of mitosis or meiosis.	Used for well-characterized and/or clinically-significant recombination features that do not fall into a specific INSDC recombination class, e.g., recombination hotspots. The annotated range represents the 5'- to the 3'-most base of the recombination region mapped by experimental evidence in the supporting publication(s).
region	SO:0000001	repeat_region		INSDC: Region of genome containing repeating units.	Used rarely for repeat regions with multiple classifications, e.g., both a tandem_repeat and a minisatellite. Has limited use for repeats that are described in the literature as being functionally significant and/or represent genomic landmarks for a region. The annotated range typically spans from the start of the 5'-most repeat to the end of the 3'-most repeat present in the reference genome ass…
regulatory_region	SO:0005836	regulatory	regulatory class=other	SO: A region of sequence that is involved in the control of a biological process.	Used for experimentally validated regulatory features that lack a specific INSDC feature class, e.g., a micrococcal nuclease hypersensitive site. The annotated range represents the exact fragment (or reference allele equivalent) assayed in the supporting publication(s), or may be estimated as described for DHSs in the case of chromatin accessibility regions.
repeat_instability_region	SO:0002202	misc_feature		SO: A repeat region that is prone to expansions and/or contractions.	Used for well-characterized and/or clinically-significant unstable repeat regions based on experimental evidence. The annotated range typically spans from the start of the 5'-most repeat to the end of the 3'-most repeat present in the reference genome assembly, as mapped in the supporting publication(s) and/or by repeat finding tools.
repeat_region	SO:0000657	repeat_region		INSDC: Region of genome containing repeating units.	Used for flanking repeats or other miscellaneous repeat types that don't cleanly represent direct, dispersed, tandem or satellite repeats, as described in the associated /note qualifier. Has limited use for repeats that are considered functionally significant in the literature and/or represent genomic landmarks. The annotated range typically spans from the start of the 5'-most repeat to the end o…
replication_regulatory_region	SO:0001682	regulatory	regulatory class=replication_regulatory_region	INSDC: Region that is involved in the control of the process of nucleotide replication but is not the origin of replication.	Used for regions shown to have experimentally verified replication regulatory activity in a publication. The annotated range represents the exact fragment (or reference allele equivalent) assayed in the supporting publication(s).
replication_start_site	SO:0002203	misc_feature		SO: A nucleotide site from which replication initiates.	Used rarely for annotating replication initiation sites. The annotated nucleotide represents the base indicated by experimental evidence in the supporting publication(s).
response_element	SO:0002205	regulatory	regulatory class=response_element	INSDC: A regulatory element that acts in response to a stimulus, usually via transcription factor binding.	Used for response elements shown to have experimentally verified activity by a genetic manipulation assay in a publication, including but not limited to evidence from reporter assays, transgenesis, knock-out, knock-in or other genome perturbation assays. The annotated range represents the exact fragment (or reference allele equivalent) assayed in the supporting publication(s).
sequence_alteration	SO:0001059	misc_feature		SO: A sequence_alteration is a sequence_feature whose extent is the deviation from another sequence.	Used for annotating variants that are considered functionally significant in a publication. The annotated range (typically a single base but can be longer) is as indicated in the supporting publication(s). A '/db_xref' qualifier may be present for the equivalent variant in the dbSNP database, if applicable.
sequence_comparison	SO:0002072	misc_feature		SO: A position or feature where two sequences have been compared.	Used rarely for annotating important sequence differences compared to another sequence, including an orthologous sequence, when the sequence is considered functionally important or a landmark region in a publication. The annotated range represents the 5'- to the 3'-most base of the sequence as asserted by comparative genomics evidence in the supporting publication(s).
sequence_feature	SO:0000110	misc_feature		SO: Any extent of continuous biological sequence.	Used rarely for annotating rare ad hoc features that can't be described by any other controlled vocabulary term, and which are considered functionally significant or landmark regions in the literature. The annotated range represents the 5'- to the 3'-most base of the feature as asserted in the supporting publication(s).
sequence_secondary_structure	SO:0000002	misc_structure		INSDC: Any secondary or tertiary nucleotide structure orconformation that cannot be described by other Structure keys (stem_loop and D-loop).	Used for miscellaneous structural regions that have been experimentally demonstrated and are considered functionally important, including G-quadruplex and cruciform structures. The annotated range represents the sequence shown to form the indicated structure in the supporting publication(s), or if there are significant haplotypic differences compared to the reference assembly allele, the range of…
silencer	SO:0000625	regulatory	regulatory class=silencer	INSDC: A regulatory region which upon binding of transcription factors suppresses the transcription of the gene(s) it controls.	Used for silencers shown to have experimentally verified activity by a genetic manipulation assay in a publication, including but not limited to evidence from reporter assays, transgenesis, knock-out, knock-in or other genome perturbation assays. The annotated range represents the exact fragment (or reference allele equivalent) assayed in the supporting publication(s).
tandem_repeat	SO:0000705	repeat_region	rpt_type=tandem	INSDC: A repeat that consists of two or more adjacent copies of a region whose length is greater than one in the same orientation.	Limited use for tandem repeats that are described in the literature as being functionally significant and/or represent genomic landmarks for a region. The annotated range typically spans from the start of the 5'-most repeat to the end of the 3'-most repeat present in the reference genome assembly, as mapped in the supporting publication(s) and/or by repeat finding tools. An '/inference' qualifier…
transcriptional_cis_regulatory_region	SO:0001055	regulatory	regulatory class=transcriptional_cis_regulatory_region	INSDC: Modulates the transcription of a gene or genes.	Used for transcriptional cis-regulatory regions shown to have experimentally verified activity by a genetic manipulation assay in a publication, including but not limited to evidence from reporter assays, transgenesis, knock-out, knock-in or other genome perturbation assays. The annotated range represents the exact fragment (or reference allele equivalent) assayed in the supporting publication(s).
1Terms from the Sequence Ontology (SO; http://www.sequenceontology.org/) used in GFF3 and bigBed files and ASN.1 formats.
2SO identifiers with links to the ontology record in the SO browser.
3International Nucleotide Sequence Database Collaboration (INSDC) feature keys (https://www.insdc.org/documents/feature-table#3.2) as used in GenBank flat file-formatted RefSeqs and in NCBI graphical displays.
4INSDC class or type qualifiers that provide more specificity to a feature type, if applicable, e.g., regulatory_class, recombination_class, rpt_type. These are indicated as qualifiers in GenBank flat files, as fields in NCBI graphical displays and as attributes in GFF3 files, column 9.
5Feature type definitions provided by INSDC or SO, where SO definitions are shown when the INSDC feature key or class is non-specific, e.g., is a misc_feature or the feature class is "other". INSDC definitions are publicly available within either the INSDC Feature Table document (https://www.insdc.org/documents/feature-table), the INSDC regulatory class controlled vocabulary document (https://www…
6Explanation of how the feature type is generally used and annotated by RefSeq Functional Elements.

## Sheet: S2C_PMIDs2features
Supplemental Table S2C. Publications used for feature evidence in human AR 109.20201120 and mouse AR 109 combined (columns A-B), and the distribution of feature numbers derived from them (columns D-E and embedded chart).
Publication	Feature count		# features	# publications
PMID:27701403	1967		1	906
PMID:17130149	1627		2	554
PMID:30612741	644		3	259
PMID:23512712	562		4	165
PMID:19165926	249		5	79
PMID:24670763	233		6	72
PMID:25395542	144		7	26
PMID:20981099	131		8	41
PMID:31784727	110		9	11
PMID:26614388	71		10	17
PMID:17135569	60		11	10
PMID:21731768	48		12	15
PMID:17897962	46		13	9
PMID:20818382	44		14	4
PMID:16149048	42		15	6
PMID:18436892	40		17	1
PMID:19280651	40		18	3
PMID:9129054	40		19	5
PMID:11586303	38		20	3
PMID:17784790	37		21	1
PMID:20506139	36		26	2
PMID:21750151	36		27	1
PMID:25613453	36		28	2
PMID:17038566	33		30	2
PMID:11309664	32		32	1
PMID:10608879	30		33	1
PMID:18650392	30		36	3
PMID:17226773	28		37	1
PMID:7035959	28		38	1
PMID:22156666	27		40	3
PMID:22220192	26		42	1
PMID:9660961	26		44	1
PMID:27895109	21		46	1
PMID:22144875	20		48	1
PMID:25326701	20		60	1
PMID:8390355	20		71	1
PMID:1517227	19		110	1
PMID:16545539	19		131	1
PMID:20075146	19		144	1
PMID:20601956	19		233	1
PMID:25246103	19		249	1
PMID:22653751	18		562	1
PMID:26631348	18		644	1
PMID:8810289	18		1627	1
PMID:20363979	17		1967	1
PMID:15144905	15
PMID:17442700	15
PMID:19897727	15
PMID:22955617	15
PMID:24098520	15
PMID:26189818	15
PMID:21895967	14
PMID:22408256	14
PMID:23878096	14
PMID:9642238	14
PMID:16105833	13
PMID:16705164	13
PMID:17188819	13
PMID:19345119	13
PMID:20516218	13
PMID:22045503	13
PMID:22448256	13
PMID:24109594	13
PMID:25417106	13
PMID:10869351	12
PMID:11495920	12
PMID:11742542	12
PMID:11856314	12
PMID:11955612	12
PMID:12587096	12
PMID:12796854	12
PMID:17991764	12
PMID:19815620	12
PMID:19898479	12
PMID:19997128	12
PMID:22791839	12
PMID:22955616	12
PMID:23093675	12
PMID:27587399	12
PMID:12861010	11
PMID:15919796	11
PMID:22914741	11
PMID:23575226	11
PMID:24097337	11
PMID:24100303	11
PMID:25340400	11
PMID:25548254	11
PMID:8382796	11
PMID:9126989	11
PMID:10708521	10
PMID:10810089	10
PMID:10974538	10
PMID:11807024	10
PMID:14639526	10
PMID:15465489	10
PMID:1562593	10
PMID:2027748	10
PMID:2060774	10
PMID:2162843	10
PMID:27376235	10
PMID:28793263	10
PMID:30296588	10
PMID:8065368	10
PMID:8413295	10
PMID:8458325	10
PMID:9325321	10
PMID:11389586	9
PMID:12542679	9
PMID:16645595	9
PMID:22671145	9
PMID:23449223	9
PMID:27783602	9
PMID:28007784	9
PMID:8838797	9
PMID:9013762	9
PMID:9425139	9
PMID:9851772	9
PMID:10417323	8
PMID:10749884	8
PMID:10839546	8
PMID:10967107	8
PMID:11003833	8
PMID:11991950	8
PMID:12151392	8
PMID:12297986	8
PMID:12957386	8
PMID:14656222	8
PMID:14732405	8
PMID:15262984	8
PMID:15589174	8
PMID:15933212	8
PMID:16543360	8
PMID:16574740	8
PMID:16675441	8
PMID:1719374	8
PMID:17353354	8
PMID:17696881	8
PMID:1875946	8
PMID:19363497	8
PMID:20171174	8
PMID:21335086	8
PMID:22079243	8
PMID:22094313	8
PMID:22260357	8
PMID:22442009	8
PMID:22837079	8
PMID:23560502	8
PMID:24022755	8
PMID:25940622	8
PMID:2606352	8
PMID:26912062	8
PMID:28933695	8
PMID:29082356	8
PMID:7606006	8
PMID:7759510	8
PMID:8119964	8
PMID:8651299	8
PMID:9847242	8
PMID:10859308	7
PMID:11698502	7
PMID:12447688	7
PMID:12960026	7
PMID:15121777	7
PMID:16051608	7
PMID:16170155	7
PMID:16857725	7
PMID:18279675	7
PMID:18773071	7
PMID:19522013	7
PMID:19782160	7
PMID:21408189	7
PMID:21908409	7
PMID:23555282	7
PMID:24971534	7
PMID:25259561	7
PMID:25858147	7
PMID:26059097	7
PMID:7828582	7
PMID:8387519	7
PMID:8390465	7
PMID:9000171	7
PMID:9001423	7
PMID:9489712	7
PMID:9867805	7
PMID:10321835	6
PMID:10364248	6
PMID:10464314	6
PMID:10570062	6
PMID:10575032	6
PMID:10662641	6
PMID:10839547	6
PMID:11023680	6
PMID:11278481	6
PMID:11574156	6
PMID:11783950	6
PMID:11856466	6
PMID:11997516	6
PMID:12130543	6
PMID:12489990	6
PMID:14507917	6
PMID:14550751	6
PMID:14647436	6
PMID:14742674	6
PMID:15060158	6
PMID:15061870	6
PMID:1508212	6
PMID:15131266	6
PMID:15252835	6
PMID:15584989	6
PMID:1569944	6
PMID:15828872	6
PMID:15831456	6
PMID:16261157	6
PMID:16407397	6
PMID:16622012	6
PMID:16850252	6
PMID:16930954	6
PMID:16950765	6
PMID:17200153	6
PMID:17213386	6
PMID:17360901	6
PMID:17679089	6
PMID:17897790	6
PMID:18181156	6
PMID:18366346	6
PMID:19488400	6
PMID:19789348	6
PMID:2050667	6
PMID:20703256	6
PMID:21687683	6
PMID:22355045	6
PMID:22937095	6
PMID:23992526	6
PMID:24440874	6
PMID:25217496	6
PMID:26447474	6
PMID:31405024	6
PMID:3690667	6
PMID:6091047	6
PMID:7526151	6
PMID:7526924	6
PMID:7614815	6
PMID:7706298	6
PMID:7721747	6
PMID:7721782	6
PMID:7891679	6
PMID:8114691	6
PMID:8413220	6
PMID:8524268	6
PMID:8599090	6
PMID:8788073	6
PMID:8861958	6
PMID:8942627	6
PMID:9579468	6
PMID:9649510	6
PMID:9915847	6
PMID:10197620	5
PMID:10446901	5
PMID:10903837	5
PMID:11006269	5
PMID:11013235	5
PMID:11181063	5
PMID:11389587	5
PMID:12136102	5
PMID:12186862	5
PMID:12393394	5
PMID:12529387	5
PMID:12554773	5
PMID:12591615	5
PMID:12801909	5
PMID:12920040	5
PMID:1318077	5
PMID:1334085	5
PMID:14562040	5
PMID:14636995	5
PMID:1527004	5
PMID:15291746	5
PMID:15507602	5
PMID:15656994	5
PMID:15677472	5
PMID:15722458	5
PMID:15743839	5
PMID:15880103	5
PMID:15916719	5
PMID:16179863	5
PMID:16274753	5
PMID:16540586	5
PMID:16728472	5
PMID:16914737	5
PMID:17106239	5
PMID:1724287	5
PMID:17344340	5
PMID:17574778	5
PMID:19014374	5
PMID:19073165	5
PMID:19111020	5
PMID:19369396	5
PMID:19580802	5
PMID:20088826	5
PMID:20363298	5
PMID:20536385	5
PMID:20600580	5
PMID:20959288	5
PMID:21185279	5
PMID:21321362	5
PMID:2169444	5
PMID:21864606	5
PMID:22217839	5
PMID:23078112	5
PMID:23689137	5
PMID:2370867	5
PMID:24218577	5
PMID:24290376	5
PMID:24418414	5
PMID:26216945	5
PMID:32376987	5
PMID:3678824	5
PMID:3879975	5
PMID:7534297	5
PMID:8152905	5
PMID:8350061	5
PMID:8384216	5
PMID:8557677	5
PMID:8582328	5
PMID:8589688	5
PMID:8626632	5
PMID:8995271	5
PMID:9354473	5
PMID:9407061	5
PMID:9506886	5
PMID:9657768	5
PMID:9658405	5
PMID:9703017	5
PMID:9815658	5
PMID:9847251	5
PMID:10037683	4
PMID:10207042	4
PMID:10402671	4
PMID:10428965	4
PMID:10457277	4
PMID:10534403	4
PMID:10595394	4
PMID:10677509	4
PMID:10760582	4
PMID:10773883	4
PMID:10813843	4
PMID:10816578	4
PMID:10873628	4
PMID:10942418	4
PMID:10975466	4
PMID:11042032	4
PMID:11054415	4
PMID:11064155	4
PMID:11112377	4
PMID:11159021	4
PMID:11162892	4
PMID:11228546	4
PMID:11244563	4
PMID:11502872	4
PMID:11836419	4
PMID:11875113	4
PMID:11880951	4
PMID:11891851	4
PMID:12054865	4
PMID:12181452	4
PMID:12354783	4
PMID:12459268	4
PMID:12571232	4
PMID:12782133	4
PMID:12837695	4
PMID:12963737	4
PMID:14576318	4
PMID:14761860	4
PMID:14960358	4
PMID:15081125	4
PMID:15131259	4
PMID:15236313	4
PMID:1549475	4
PMID:15507491	4
PMID:15516693	4
PMID:15557334	4
PMID:15798195	4
PMID:15838506	4
PMID:15998734	4
PMID:16115867	4
PMID:1634226	4
PMID:1660893	4
PMID:16623715	4
PMID:16707432	4
PMID:16721058	4
PMID:16901925	4
PMID:17158875	4
PMID:17200120	4
PMID:17290216	4
PMID:17573529	4
PMID:1779965	4
PMID:17823307	4
PMID:17909266	4
PMID:18077433	4
PMID:18417734	4
PMID:18435917	4
PMID:1845843	4
PMID:18536724	4
PMID:18579682	4
PMID:18640248	4
PMID:18845640	4
PMID:18931025	4
PMID:19106115	4
PMID:19116246	4
PMID:1939218	4
PMID:19449463	4
PMID:1980158	4
PMID:19855085	4
PMID:19860858	4
PMID:2000371	4
PMID:20052674	4
PMID:2019605	4
PMID:20231293	4
PMID:20359516	4
PMID:20558332	4
PMID:20864747	4
PMID:21700710	4
PMID:21711161	4
PMID:2171939	4
PMID:22057826	4
PMID:2210383	4
PMID:22128023	4
PMID:22233381	4
PMID:22253426	4
PMID:22340503	4
PMID:22495934	4
PMID:2253879	4
PMID:22597536	4
PMID:23220102	4
PMID:23295386	4
PMID:23376040	4
PMID:23455426	4
PMID:23657883	4
PMID:24356447	4
PMID:24506071	4
PMID:2458988	4
PMID:2461328	4
PMID:24642863	4
PMID:24661001	4
PMID:25076120	4
PMID:25077040	4
PMID:25373698	4
PMID:25381333	4
PMID:25512558	4
PMID:2559410	4
PMID:26066897	4
PMID:26252164	4
PMID:26365772	4
PMID:27681417	4
PMID:27768887	4
PMID:2786632	4
PMID:2885324	4
PMID:2911469	4
PMID:31988243	4
PMID:3208739	4
PMID:33077916	4
PMID:3480506	4
PMID:3786150	4
PMID:6327064	4
PMID:7680099	4
PMID:7686046	4
PMID:7720589	4
PMID:7776980	4
PMID:7961715	4
PMID:8039502	4
PMID:8186686	4
PMID:8406012	4
PMID:8441395	4
PMID:8443410	4
PMID:8486690	4
PMID:8576239	4
PMID:8626436	4
PMID:8643605	4
PMID:8662744	4
PMID:8702507	4
PMID:8855267	4
PMID:8865168	4
PMID:8960105	4
PMID:8999942	4
PMID:9013759	4
PMID:9043076	4
PMID:9139807	4
PMID:9178905	4
PMID:9231796	4
PMID:9336463	4
PMID:9356241	4
PMID:9374555	4
PMID:9478995	4
PMID:9566892	4
PMID:9712833	4
PMID:9806635	4
PMID:9834246	4
PMID:9874250	4
PMID:9878258	4
PMID:9882499	4
PMID:10024520	3
PMID:10079359	3
PMID:10092611	3
PMID:10187819	3
PMID:10191090	3
PMID:10220430	3
PMID:10320791	3
PMID:10413100	3
PMID:10435592	3
PMID:10446902	3
PMID:10452544	3
PMID:10488050	3
PMID:10561583	3
PMID:10567409	3
PMID:10585453	3
PMID:10625605	3
PMID:10625666	3
PMID:10644752	3
PMID:10770922	3
PMID:10804179	3
PMID:10911365	3
PMID:10961992	3
PMID:10965053	3
PMID:10973953	3
PMID:10985858	3
PMID:10993829	3
PMID:11000266	3
PMID:11000519	3
PMID:11014212	3
PMID:11053006	3
PMID:11054558	3
PMID:11126367	3
PMID:11133159	3
PMID:11134109	3
PMID:11145739	3
PMID:11254751	3
PMID:11316758	3
PMID:11390427	3
PMID:11394901	3
PMID:11438703	3
PMID:11463853	3
PMID:11485307	3
PMID:11555653	3
PMID:11590122	3
PMID:11606049	3
PMID:11684680	3
PMID:11830496	3
PMID:11850181	3
PMID:11897684	3
PMID:11900492	3
PMID:11923472	3
PMID:12028584	3
PMID:12082627	3
PMID:12107189	3
PMID:12189206	3
PMID:12192491	3
PMID:12200434	3
PMID:12571085	3
PMID:12582237	3
PMID:12586348	3
PMID:12663044	3
PMID:12710953	3
PMID:12788789	3
PMID:12799453	3
PMID:12869636	3
PMID:12874112	3
PMID:12902329	3
PMID:1400503	3
PMID:14534330	3
PMID:1454538	3
PMID:14576823	3
PMID:14613893	3
PMID:14629727	3
PMID:1463458	3
PMID:14636653	3
PMID:14645496	3
PMID:14673137	3
PMID:15013809	3
PMID:15024083	3
PMID:15028291	3
PMID:15037572	3
PMID:15061658	3
PMID:15096508	3
PMID:15100175	3
PMID:15102485	3
PMID:15115437	3
PMID:1515647	3
PMID:15183731	3
PMID:15229244	3
PMID:15252010	3
PMID:15451172	3
PMID:15671201	3
PMID:15680372	3
PMID:15708372	3
PMID:15737622	3
PMID:15777845	3
PMID:15860457	3
PMID:15888734	3
PMID:16000302	3
PMID:16085752	3
PMID:16397882	3
PMID:1641328	3
PMID:16458883	3
PMID:1648980	3
PMID:16581802	3
PMID:16648467	3
PMID:16680198	3
PMID:16735463	3
PMID:1675638	3
PMID:1682894	3
PMID:1690839	3
PMID:17005281	3
PMID:17079138	3
PMID:17158780	3
PMID:1717947	3
PMID:17250678	3
PMID:17289023	3
PMID:1733959	3
PMID:17350185	3
PMID:17516925	3
PMID:17663789	3
PMID:17668008	3
PMID:17678620	3
PMID:17909009	3
PMID:17910945	3
PMID:18334644	3
PMID:18377656	3
PMID:18445271	3
PMID:18483152	3
PMID:18496767	3
PMID:18760339	3
PMID:18957414	3
PMID:18971960	3
PMID:19047043	3
PMID:19056816	3
PMID:1905948	3
PMID:19129223	3
PMID:19293338	3
PMID:19349985	3
PMID:19359379	3
PMID:1939213	3
PMID:19501422	3
PMID:19624807	3
PMID:19633418	3
PMID:20054233	3
PMID:20060812	3
PMID:2007603	3
PMID:20215006	3
PMID:20360044	3
PMID:20413611	3
PMID:20470391	3
PMID:20601698	3
PMID:20808686	3
PMID:20852263	3
PMID:20960024	3
PMID:20970527	3
PMID:20977903	3
PMID:21109226	3
PMID:21238539	3
PMID:21309950	3
PMID:21549805	3
PMID:2159384	3
PMID:21668996	3
PMID:21729882	3
PMID:21770893	3
PMID:21876128	3
PMID:2188089	3
PMID:21927023	3
PMID:22303449	3
PMID:22402017	3
PMID:22457346	3
PMID:22543974	3
PMID:22561792	3
PMID:22581331	3
PMID:2259631	3
PMID:22675249	3
PMID:22701669	3
PMID:23430257	3
PMID:23643616	3
PMID:23796710	3
PMID:23825960	3
PMID:2431269	3
PMID:24324735	3
PMID:24419320	3
PMID:2452972	3
PMID:2471155	3
PMID:25239830	3
PMID:25825735	3
PMID:2592370	3
PMID:26374622	3
PMID:26507665	3
PMID:26615198	3
PMID:26739814	3
PMID:26740941	3
PMID:27191258	3
PMID:27253998	3
PMID:2841570	3
PMID:29140443	3
PMID:3062372	3
PMID:3384331	3
PMID:3691478	3
PMID:6305652	3
PMID:7499338	3
PMID:7499410	3
PMID:7499416	3
PMID:7524502	3
PMID:7532307	3
PMID:7541039	3
PMID:7629096	3
PMID:7692231	3
PMID:7721793	3
PMID:7823919	3
PMID:7823928	3
PMID:7890725	3
PMID:7929376	3
PMID:7964503	3
PMID:7969117	3
PMID:8120057	3
PMID:8132535	3
PMID:8132626	3
PMID:8349622	3
PMID:8384306	3
PMID:8414514	3
PMID:8490185	3
PMID:8550612	3
PMID:8554386	3
PMID:8562455	3
PMID:8566789	3
PMID:8584035	3
PMID:8662652	3
PMID:8690723	3
PMID:8703023	3
PMID:8910544	3
PMID:8943230	3
PMID:8943307	3
PMID:9013587	3
PMID:9070893	3
PMID:9097969	3
PMID:9149321	3
PMID:9178767	3
PMID:9218488	3
PMID:9271390	3
PMID:9287329	3
PMID:9314837	3
PMID:9334245	3
PMID:9354474	3
PMID:9361007	3
PMID:9478971	3
PMID:9570155	3
PMID:9572484	3
PMID:9694739	3
PMID:9724759	3
PMID:9756890	3
PMID:9786929	3
PMID:9806636	3
PMID:9883578	3
PMID:9920775	3
PMID:9922386	3
PMID:9973199	3
PMID:10022915	2
PMID:10027904	2
PMID:10051545	2
PMID:10072439	2
PMID:10075672	2
PMID:10079367	2
PMID:10102579	2
PMID:10196210	2
PMID:10215629	2
PMID:10358083	2
PMID:10403778	2
PMID:10435576	2
PMID:10441516	2
PMID:10448643	2
PMID:10460832	2
PMID:10473624	2
PMID:10477683	2
PMID:10481059	2
PMID:10512744	2
PMID:10521447	2
PMID:10606235	2
PMID:10623580	2
PMID:10639585	2
PMID:10652351	2
PMID:10653986	2
PMID:10692469	2
PMID:10720330	2
PMID:10722652	2
PMID:10746638	2
PMID:10767561	2
PMID:10777207	2
PMID:10777541	2
PMID:10788516	2
PMID:10835276	2
PMID:10839462	2
PMID:10839543	2
PMID:10886517	2
PMID:10891496	2
PMID:10900019	2
PMID:10906158	2
PMID:10936858	2
PMID:10959088	2
PMID:10962555	2
PMID:10970902	2
PMID:10982026	2
PMID:10995009	2
PMID:11029758	2
PMID:11032856	2
PMID:11042172	2
PMID:11054542	2
PMID:11058598	2
PMID:11063722	2
PMID:11121056	2
PMID:11145563	2
PMID:11170135	2
PMID:11181509	2
PMID:11223243	2
PMID:11328860	2
PMID:11392325	2
PMID:11401538	2
PMID:11432851	2
PMID:11443188	2
PMID:11448937	2
PMID:11478782	2
PMID:11479593	2
PMID:11485314	2
PMID:11549270	2
PMID:11564732	2
PMID:11567985	2
PMID:11574690	2
PMID:11590134	2
PMID:11696376	2
PMID:11698415	2
PMID:11707075	2
PMID:11756167	2
PMID:11773435	2
PMID:11809897	2
PMID:11861425	2
PMID:11867225	2
PMID:11874916	2
PMID:11889467	2
PMID:11891846	2
PMID:11932209	2
PMID:11960979	2
PMID:11979559	2
PMID:11981041	2
PMID:11986249	2
PMID:11994385	2
PMID:12004059	2
PMID:12019268	2
PMID:12039036	2
PMID:12044867	2
PMID:12054672	2
PMID:12089524	2
PMID:12117567	2
PMID:12136238	2
PMID:12181331	2
PMID:12183408	2
PMID:12193659	2
PMID:12351690	2
PMID:12372429	2
PMID:12397062	2
PMID:12397605	2
PMID:12411602	2
PMID:12456803	2
PMID:12481295	2
PMID:12490567	2
PMID:12533514	2
PMID:12554789	2
PMID:12569263	2
PMID:12590140	2
PMID:12616531	2
PMID:12640113	2
PMID:12695546	2
PMID:12748281	2
PMID:12750290	2
PMID:12756174	2
PMID:12759356	2
PMID:12790807	2
PMID:12811842	2
PMID:12815047	2
PMID:12829629	2
PMID:12855703	2
PMID:12874791	2
PMID:12878221	2
PMID:1291239	2
PMID:12919953	2
PMID:12935472	2
PMID:12962539	2
PMID:12970787	2
PMID:1312839	2
PMID:1321136	2
PMID:1321810	2
PMID:1323057	2
PMID:1324192	2
PMID:1331779	2
PMID:1378295	2
PMID:1419909	2
PMID:1438257	2
PMID:1446829	2
PMID:14522900	2
PMID:1454540	2
PMID:14555463	2
PMID:14561739	2
PMID:14599292	2
PMID:14629726	2
PMID:1464612	2
PMID:14671206	2
PMID:14684846	2
PMID:14712233	2
PMID:14715080	2
PMID:14747441	2
PMID:1487505	2
PMID:14974084	2
PMID:14975726	2
PMID:14988020	2
PMID:15001549	2
PMID:15025563	2
PMID:15044642	2
PMID:15082719	2
PMID:15093729	2
PMID:15120610	2
PMID:15121842	2
PMID:15145062	2
PMID:15199161	2
PMID:15215894	2
PMID:15247629	2
PMID:1524826	2
PMID:15252036	2
PMID:15289308	2
PMID:15349898	2
PMID:15368359	2
PMID:1545795	2
PMID:15467729	2
PMID:15479859	2
PMID:15485926	2
PMID:15498889	2
PMID:15499176	2
PMID:15521013	2
PMID:15580547	2
PMID:15613430	2
PMID:15614767	2
PMID:15618465	2
PMID:15619621	2
PMID:15640245	2
PMID:15657367	2
PMID:15751078	2
PMID:15765517	2
PMID:15782197	2
PMID:15789408	2
PMID:15829955	2
PMID:15843824	2
PMID:15849719	2
PMID:15885980	2
PMID:15888481	2
PMID:15908194	2
PMID:15919766	2
PMID:15928316	2
PMID:15950726	2
PMID:15950906	2
PMID:15987698	2
PMID:15988017	2
PMID:15990270	2
PMID:15994202	2
PMID:16082215	2
PMID:16109380	2
PMID:16123409	2
PMID:16166424	2
PMID:16166633	2
PMID:16203738	2
PMID:16297991	2
PMID:16380174	2
PMID:16385461	2
PMID:1639815	2
PMID:16411204	2
PMID:16505155	2
PMID:16541131	2
PMID:16608438	2
PMID:16670084	2
PMID:16685268	2
PMID:16772120	2
PMID:16801560	2
PMID:16825291	2
PMID:16840789	2
PMID:16849547	2
PMID:16877422	2
PMID:16877501	2
PMID:16892051	2
PMID:16954389	2
PMID:1696926	2
PMID:17049510	2
PMID:17066077	2
PMID:17095575	2
PMID:17125879	2
PMID:1717993	2
PMID:17210670	2
PMID:17251190	2
PMID:17268511	2
PMID:17283120	2
PMID:17352650	2
PMID:17409199	2
PMID:17433733	2
PMID:17455195	2
PMID:17560709	2
PMID:17561994	2
PMID:17646279	2
PMID:17653093	2
PMID:17698954	2
PMID:17761769	2
PMID:1778977	2
PMID:17823304	2
PMID:17846122	2
PMID:17848139	2
PMID:17877719	2
PMID:17936743	2
PMID:17938202	2
PMID:18055562	2
PMID:18084320	2
PMID:18088579	2
PMID:18165439	2
PMID:18198175	2
PMID:18212064	2
PMID:1822431	2
PMID:18275068	2
PMID:18279667	2
PMID:18283123	2
PMID:18303024	2
PMID:18388181	2
PMID:18442887	2
PMID:18453593	2
PMID:18454134	2
PMID:18471437	2
PMID:18537119	2
PMID:18579725	2
PMID:18586674	2
PMID:18716005	2
PMID:18786169	2
PMID:18990703	2
PMID:19017640	2
PMID:19096511	2
PMID:19116245	2
PMID:19127545	2
PMID:19131315	2
PMID:1915274	2
PMID:19156837	2
PMID:19164466	2
PMID:19234473	2
PMID:19267881	2
PMID:19270068	2
PMID:19342447	2
PMID:19393184	2
PMID:19402223	2
PMID:19405878	2
PMID:19467232	2
PMID:19603533	2
PMID:19605792	2
PMID:19633672	2
PMID:19759027	2
PMID:19799567	2
PMID:19809496	2
PMID:19855097	2
PMID:1996113	2
PMID:20006635	2
PMID:20007505	2
PMID:20038639	2
PMID:20045680	2
PMID:20086032	2
PMID:20157332	2
PMID:20160399	2
PMID:20231365	2
PMID:20410667	2
PMID:20428114	2
PMID:20430007	2
PMID:20435009	2
PMID:20436485	2
PMID:2055467	2
PMID:20623358	2
PMID:20634641	2
PMID:20673865	2
PMID:20711191	2
PMID:20884053	2
PMID:20887713	2
PMID:20937355	2
PMID:20941745	2
PMID:20952403	2
PMID:20979191	2
PMID:21107579	2
PMID:21118512	2
PMID:21144789	2
PMID:21300782	2
PMID:21302301	2
PMID:21393445	2
PMID:21411747	2
PMID:21454523	2
PMID:21677782	2
PMID:2168168	2
PMID:21689639	2
PMID:2175918	2
PMID:21970403	2
PMID:22174821	2
PMID:22278040	2
PMID:2233742	2
PMID:22349263	2
PMID:2235483	2
PMID:22421044	2
PMID:22484313	2
PMID:22493287	2
PMID:22543972	2
PMID:22572884	2
PMID:22573555	2
PMID:22775437	2
PMID:22808239	2
PMID:22871890	2
PMID:23001912	2
PMID:23023397	2
PMID:23041609	2
PMID:2304474	2
PMID:23201014	2
PMID:2325025	2
PMID:2331750	2
PMID:23356643	2
PMID:23383005	2
PMID:23447416	2
PMID:23451274	2
PMID:23533340	2
PMID:23560079	2
PMID:23583951	2
PMID:23674600	2
PMID:23680656	2
PMID:23772048	2
PMID:23781282	2
PMID:2388272	2
PMID:24265756	2
PMID:24301678	2
PMID:2435718	2
PMID:24424044	2
PMID:24561805	2
PMID:24610003	2
PMID:24613343	2
PMID:2462558	2
PMID:2463463	2
PMID:2478223	2
PMID:24794774	2
PMID:24817273	2
PMID:24830941	2
PMID:24885809	2
PMID:24963028	2
PMID:24971505	2
PMID:24973035	2
PMID:2501159	2
PMID:25135225	2
PMID:25392503	2
PMID:25411453	2
PMID:25567987	2
PMID:25604083	2
PMID:2567000	2
PMID:25671638	2
PMID:25784220	2
PMID:25841653	2
PMID:2588000	2
PMID:25977370	2
PMID:25997547	2
PMID:26171949	2
PMID:26173901	2
PMID:26206884	2
PMID:26252834	2
PMID:26372689	2
PMID:26584547	2
PMID:26588701	2
PMID:26673704	2
PMID:26679744	2
PMID:2686984	2
PMID:26883634	2
PMID:27044088	2
PMID:27226639	2
PMID:2748586	2
PMID:2788922	2
PMID:2840669	2
PMID:28530704	2
PMID:28970114	2
PMID:2922398	2
PMID:29543231	2
PMID:29556077	2
PMID:30867287	2
PMID:31217582	2
PMID:3165490	2
PMID:32793908	2
PMID:3336367	2
PMID:3366897	2
PMID:3401591	2
PMID:3409463	2
PMID:3464002	2
PMID:3474627	2
PMID:3478680	2
PMID:3779841	2
PMID:6200877	2
PMID:6985477	2
PMID:7508123	2
PMID:7513081	2
PMID:7529875	2
PMID:7537042	2
PMID:7537848	2
PMID:7540005	2
PMID:7540720	2
PMID:7541763	2
PMID:7565722	2
PMID:7575618	2
PMID:7588264	2
PMID:7590241	2
PMID:7626216	2
PMID:7667273	2
PMID:7677767	2
PMID:7681143	2
PMID:7684942	2
PMID:7721811	2
PMID:7748495	2
PMID:7768959	2
PMID:7769848	2
PMID:7794915	2
PMID:7799927	2
PMID:7819139	2
PMID:7853405	2
PMID:7859371	2
PMID:7877972	2
PMID:7881407	2
PMID:7958423	2
PMID:7969146	2
PMID:8024563	2
PMID:8041756	2
PMID:8049444	2
PMID:8061918	2
PMID:8062833	2
PMID:8119986	2
PMID:8143853	2
PMID:8146162	2
PMID:8152920	2
PMID:8182931	2
PMID:8205615	2
PMID:8207464	2
PMID:8329120	2
PMID:8382688	2
PMID:8420924	2
PMID:8434602	2
PMID:8497248	2
PMID:8537408	2
PMID:8606002	2
PMID:8607810	2
PMID:8614400	2
PMID:8631266	2
PMID:8632190	2
PMID:8645191	2
PMID:8645245	2
PMID:8654951	2
PMID:8692864	2
PMID:8798416	2
PMID:8798445	2
PMID:8832901	2
PMID:8844688	2
PMID:8910454	2
PMID:8914017	2
PMID:8929413	2
PMID:8994191	2
PMID:8999953	2
PMID:9006935	2
PMID:9012480	2
PMID:9013589	2
PMID:9013761	2
PMID:9016677	2
PMID:9069166	2
PMID:9102211	2
PMID:9121493	2
PMID:9140403	2
PMID:9182762	2
PMID:9182765	2
PMID:9188726	2
PMID:9199305	2
PMID:9224617	2
PMID:9232190	2
PMID:9326936	2
PMID:9334254	2
PMID:9346889	2
PMID:9361026	2
PMID:9384614	2
PMID:9388470	2
PMID:9466818	2
PMID:9506439	2
PMID:9512462	2
PMID:9545397	2
PMID:9546436	2
PMID:9582429	2
PMID:9628885	2
PMID:9636081	2
PMID:9668526	2
PMID:9671750	2
PMID:9693381	2
PMID:9727046	2
PMID:9727070	2
PMID:9733777	2
PMID:9737995	2
PMID:9757029	2
PMID:9774680	2
PMID:9783807	2
PMID:9794229	2
PMID:9801874	2
PMID:9804819	2
PMID:9809750	2
PMID:9811943	2
PMID:9837721	2
PMID:9865725	2
PMID:9869301	2
PMID:9887342	2
PMID:9892013	2
PMID:9892636	2
PMID:9973254	2
PMID:10022128	1
PMID:10022837	1
PMID:10026229	1
PMID:10037704	1
PMID:10050972	1
PMID:10079100	1
PMID:10085126	1
PMID:10085153	1
PMID:10095084	1
PMID:10192387	1
PMID:10196378	1
PMID:10198420	1
PMID:10220452	1
PMID:10221765	1
PMID:10224145	1
PMID:10229861	1
PMID:10233416	1
PMID:10319323	1
PMID:10353606	1
PMID:10359729	1
PMID:10403849	1
PMID:10406460	1
PMID:10419010	1
PMID:10419062	1
PMID:10433203	1
PMID:10435440	1
PMID:10469141	1
PMID:10484766	1
PMID:10484774	1
PMID:10491286	1
PMID:10506586	1
PMID:10516149	1
PMID:10516770	1
PMID:10536237	1
PMID:10542267	1
PMID:10545204	1
PMID:10558858	1
PMID:10562551	1
PMID:10571183	1
PMID:10581021	1
PMID:10581035	1
PMID:10585866	1
PMID:10601322	1
PMID:10649435	1
PMID:10673766	1
PMID:10683314	1
PMID:10702233	1
PMID:10706625	1
PMID:10713142	1
PMID:10715538	1
PMID:10723141	1
PMID:10744771	1
PMID:10747853	1
PMID:10749978	1
PMID:10753117	1
PMID:10767349	1
PMID:10805720	1
PMID:10807795	1
PMID:10825386	1
PMID:10849427	1
PMID:10861842	1
PMID:10871406	1
PMID:10882078	1
PMID:10882079	1
PMID:10890879	1
PMID:10891470	1
PMID:10938265	1
PMID:10970794	1
PMID:11016753	1
PMID:11017075	1
PMID:11025212	1
PMID:11036073	1
PMID:11064449	1
PMID:11102531	1
PMID:11114294	1
PMID:11118882	1
PMID:11121218	1
PMID:11157481	1
PMID:11158302	1
PMID:11162490	1
PMID:11174853	1
PMID:11175337	1
PMID:11191079	1
PMID:11196131	1
PMID:11196473	1
PMID:11207191	1
PMID:11208763	1
PMID:11245431	1
PMID:11280806	1
PMID:11285244	1
PMID:11313975	1
PMID:11349124	1
PMID:11353514	1
PMID:11368363	1
PMID:11433024	1
PMID:11447280	1
PMID:11448935	1
PMID:11454703	1
PMID:11474579	1
PMID:11486088	1
PMID:11500942	1
PMID:11504872	1
PMID:11517325	1
PMID:11518759	1
PMID:11536045	1
PMID:11545582	1
PMID:11553791	1
PMID:11564608	1
PMID:11604227	1
PMID:11694876	1
PMID:11702949	1
PMID:11704836	1
PMID:11714668	1
PMID:11719506	1
PMID:11723248	1
PMID:11773448	1
PMID:11773636	1
PMID:11784049	1
PMID:11805098	1
PMID:11809796	1
PMID:11825903	1
PMID:11855854	1
PMID:11864972	1
PMID:11911950	1
PMID:11919177	1
PMID:11927588	1
PMID:11948690	1
PMID:11971879	1
PMID:11973645	1
PMID:12004060	1
PMID:12007705	1
PMID:12034837	1
PMID:12048204	1
PMID:12049716	1
PMID:12072567	1
PMID:12084725	1
PMID:12101129	1
PMID:12126624	1
PMID:12145340	1
PMID:12151407	1
PMID:12163396	1
PMID:12183364	1
PMID:12210726	1
PMID:12213778	1
PMID:12215259	1
PMID:12215445	1
PMID:12225970	1
PMID:12226793	1
PMID:12234688	1
PMID:12370427	1
PMID:12381793	1
PMID:12397609	1
PMID:12406571	1
PMID:12406907	1
PMID:12408967	1
PMID:12429737	1
PMID:12445200	1
PMID:12455635	1
PMID:12473863	1
PMID:12480519	1
PMID:12492513	1
PMID:12511606	1
PMID:12514743	1
PMID:12525692	1
PMID:12551949	1
PMID:12580760	1
PMID:12589000	1
PMID:12589022	1
PMID:12589650	1
PMID:12591928	1
PMID:12606452	1
PMID:12611896	1
PMID:12637547	1
PMID:12640109	1
PMID:12649807	1
PMID:12650610	1
PMID:12668617	1
PMID:12690040	1
PMID:12732652	1
PMID:12734209	1
PMID:12748906	1
PMID:12750453	1
PMID:12773394	1
PMID:12782640	1
PMID:12805445	1
PMID:12829700	1
PMID:12835403	1
PMID:12837040	1
PMID:12839940	1
PMID:12855602	1
PMID:12857749	1
PMID:12858361	1
PMID:12871646	1
PMID:12874418	1
PMID:12890574	1
PMID:12915995	1
PMID:12917399	1
PMID:12920202	1
PMID:12939463	1
PMID:12941700	1
PMID:12944911	1
PMID:12958187	1
PMID:1303283	1
PMID:1310900	1
PMID:1312351	1
PMID:1325645	1
PMID:1331774	1
PMID:1372865	1
PMID:1373328	1
PMID:1375227	1
PMID:1406703	1
PMID:1425590	1
PMID:1426633	1
PMID:1446828	1
PMID:1448097	1
PMID:14504231	1
PMID:14530429	1
PMID:14563845	1
PMID:14570928	1
PMID:14580722	1
PMID:14645507	1
PMID:14648838	1
PMID:1465381	1
PMID:14673133	1
PMID:14681303	1
PMID:14684685	1
PMID:14691152	1
PMID:14699509	1
PMID:14722087	1
PMID:14726452	1
PMID:14736747	1
PMID:14753740	1
PMID:14757826	1
PMID:1487146	1
PMID:14960721	1
PMID:14988426	1
PMID:14988427	1
PMID:15044435	1
PMID:15108308	1
PMID:15109498	1
PMID:15121836	1
PMID:15126349	1
PMID:15138629	1
PMID:15148657	1
PMID:15181096	1
PMID:15203205	1
PMID:15297458	1
PMID:1531036	1
PMID:15314640	1
PMID:15331176	1
PMID:15345327	1
PMID:15353176	1
PMID:15358786	1
PMID:15367601	1
PMID:15371341	1
PMID:15371411	1
PMID:1537556	1
PMID:15377660	1
PMID:1545807	1
PMID:15548547	1
PMID:15550512	1
PMID:15563456	1
PMID:15578590	1
PMID:15611122	1
PMID:1562592	1
PMID:15629899	1
PMID:15653697	1
PMID:15661911	1
PMID:15677727	1
PMID:15688015	1
PMID:15703179	1
PMID:15757903	1
PMID:15767669	1
PMID:15777733	1
PMID:15778453	1
PMID:15790955	1
PMID:15831452	1
PMID:15840518	1
PMID:15850785	1
PMID:15944728	1
PMID:15964798	1
PMID:15970437	1
PMID:15970701	1
PMID:15972688	1
PMID:15979088	1
PMID:15993855	1
PMID:15994939	1
PMID:16007221	1
PMID:16007255	1
PMID:16009426	1
PMID:16023419	1
PMID:16043491	1
PMID:16055715	1
PMID:16059932	1
PMID:16086312	1
PMID:16105645	1
PMID:16109738	1
PMID:16140555	1
PMID:16182245	1
PMID:16189270	1
PMID:16229810	1
PMID:16236706	1
PMID:16269442	1
PMID:16271033	1
PMID:1630457	1
PMID:16322405	1
PMID:16330480	1
PMID:16338472	1
PMID:16344462	1
PMID:16412259	1
PMID:16444712	1
PMID:16453281	1
PMID:16464859	1
PMID:1647813	1
PMID:16482219	1
PMID:16491076	1
PMID:16513849	1
PMID:16516862	1
PMID:1651939	1
PMID:16547000	1
PMID:16582587	1
PMID:16625209	1
PMID:16625320	1
PMID:16670003	1
PMID:16682116	1
PMID:16687394	1
PMID:16713975	1
PMID:16720553	1
PMID:16723452	1
PMID:16730372	1
PMID:16737450	1
PMID:16737810	1
PMID:16765502	1
PMID:16785237	1
PMID:16786196	1
PMID:16790525	1
PMID:16823771	1
PMID:16845368	1
PMID:16857744	1
PMID:16888033	1
PMID:16895910	1
PMID:16931914	1
PMID:1696235	1
PMID:16980957	1
PMID:16990260	1
PMID:16997917	1
PMID:1700277	1
PMID:1700853	1
PMID:17014839	1
PMID:17077320	1
PMID:1709163	1
PMID:17101793	1
PMID:17110138	1
PMID:17116688	1
PMID:17116727	1
PMID:17122106	1
PMID:17140559	1
PMID:17187077	1
PMID:1719379	1
PMID:17196195	1
PMID:17196956	1
PMID:17205512	1
PMID:1722205	1
PMID:17227585	1
PMID:17236128	1
PMID:1723621	1
PMID:17258784	1
PMID:17283059	1
PMID:17303623	1
PMID:17306764	1
PMID:17317039	1
PMID:17325044	1
PMID:1736298	1
PMID:1736303	1
PMID:1737096	1
PMID:17434164	1
PMID:17440116	1
PMID:17442571	1
PMID:17478759	1
PMID:17485108	1
PMID:17488195	1
PMID:17519303	1
PMID:17548470	1
PMID:17548528	1
PMID:17550777	1
PMID:17588951	1
PMID:17634147	1
PMID:1764264	1
PMID:17654503	1
PMID:17662950	1
PMID:17664401	1
PMID:17671180	1
PMID:17689681	1
PMID:17696253	1
PMID:17705132	1
PMID:1775136	1
PMID:17764444	1
PMID:17785579	1
PMID:17785633	1
PMID:1781406	1
PMID:17922573	1
PMID:17928287	1
PMID:17956871	1
PMID:18160775	1
PMID:18174359	1
PMID:18176564	1
PMID:18182446	1
PMID:18208837	1
PMID:18234909	1
PMID:18264089	1
PMID:18282108	1
PMID:18337838	1
PMID:1836454	1
PMID:18421578	1
PMID:18459127	1
PMID:18461170	1
PMID:18474398	1
PMID:1847689	1
PMID:18478180	1
PMID:18496514	1
PMID:18506848	1
PMID:18519709	1
PMID:18556800	1
PMID:18583320	1
PMID:18586828	1
PMID:18591936	1
PMID:18599618	1
PMID:18628967	1
PMID:18632798	1
PMID:18662995	1
PMID:18682241	1
PMID:18687992	1
PMID:18755854	1
PMID:18761606	1
PMID:18787026	1
PMID:18829533	1
PMID:18836447	1
PMID:18849531	1
PMID:18854042	1
PMID:19022561	1
PMID:1902783	1
PMID:19059462	1
PMID:19074998	1
PMID:19159624	1
PMID:19212333	1
PMID:19254740	1
PMID:19299445	1
PMID:19327734	1
PMID:19331172	1
PMID:19338047	1
PMID:19346495	1
PMID:19386588	1
PMID:19401440	1
PMID:19408304	1
PMID:19431182	1
PMID:19439415	1
PMID:19467240	1
PMID:19520737	1
PMID:19531481	1
PMID:19545172	1
PMID:19556240	1
PMID:19571439	1
PMID:19615412	1
PMID:19616114	1
PMID:19638425	1
PMID:1964490	1
PMID:19660458	1
PMID:19661464	1
PMID:19682433	1
PMID:19690621	1
PMID:19690980	1
PMID:19706729	1
PMID:19707792	1
PMID:19712670	1
PMID:1977134	1
PMID:19773398	1
PMID:19797210	1
PMID:19806612	1
PMID:19833192	1
PMID:19881470	1
PMID:19890878	1
PMID:19902333	1
PMID:1990282	1
PMID:19958188	1
PMID:19965778	1
PMID:19995889	1
PMID:20065963	1
PMID:20079471	1
PMID:20096094	1
PMID:20123678	1
PMID:20189986	1
PMID:20202217	1
PMID:20206639	1
PMID:20233723	1
PMID:2038339	1
PMID:20386744	1
PMID:2039496	1
PMID:20412780	1
PMID:20507355	1
PMID:20598273	1
PMID:20609221	1
PMID:2062380	1
PMID:20629177	1
PMID:20637858	1
PMID:20675569	1
PMID:20693263	1
PMID:20704263	1
PMID:20723539	1
PMID:20858598	1
PMID:20872845	1
PMID:20937271	1
PMID:20937833	1
PMID:20962249	1
PMID:20965237	1
PMID:21087171	1
PMID:21188138	1
PMID:21193556	1
PMID:21199372	1
PMID:21205797	1
PMID:21211522	1
PMID:21272048	1
PMID:21288909	1
PMID:21319151	1
PMID:21412441	1
PMID:21424707	1
PMID:21443745	1
PMID:21445863	1
PMID:21450989	1
PMID:21493749	1
PMID:21555002	1
PMID:2161847	1
PMID:21646728	1
PMID:21666725	1
PMID:21669963	1
PMID:2167445	1
PMID:21683323	1
PMID:21695148	1
PMID:21695256	1
PMID:21713995	1
PMID:2174889	1
PMID:21757507	1
PMID:21784138	1
PMID:21804629	1
PMID:21865161	1
PMID:21875313	1
PMID:21940735	1
PMID:21944778	1
PMID:21944779	1
PMID:21948798	1
PMID:21971485	1
PMID:21997191	1
PMID:2209539	1
PMID:22158048	1
PMID:2216716	1
PMID:2217202	1
PMID:22198669	1
PMID:22240097	1
PMID:22240313	1
PMID:22253417	1
PMID:22258560	1
PMID:22289258	1
PMID:22292071	1
PMID:22293114	1
PMID:22354993	1
PMID:22415835	1
PMID:22422618	1
PMID:22495965	1
PMID:22532872	1
PMID:22539273	1
PMID:22544812	1
PMID:22617288	1
PMID:22628303	1
PMID:22641479	1
PMID:22665440	1
PMID:22669946	1
PMID:22723857	1
PMID:22728071	1
PMID:22734700	1
PMID:22772991	1
PMID:22801370	1
PMID:22837390	1
PMID:22847929	1
PMID:22854964	1
PMID:22929025	1
PMID:22983127	1
PMID:23018034	1
PMID:23032104	1
PMID:2304460	1
PMID:23064752	1
PMID:2307466	1
PMID:23205607	1
PMID:23212346	1
PMID:23248301	1
PMID:23325854	1
PMID:23353771	1
PMID:23359656	1
PMID:23370526	1
PMID:23433111	1
PMID:23519980	1
PMID:23588714	1
PMID:23592398	1
PMID:23626735	1
PMID:2370857	1
PMID:23718986	1
PMID:23727221	1
PMID:23774402	1
PMID:23846226	1
PMID:23900540	1
PMID:23963652	1
PMID:24006278	1
PMID:2401360	1
PMID:24058409	1
PMID:24135681	1
PMID:24157522	1
PMID:24218639	1
PMID:24244860	1
PMID:24257117	1
PMID:24265455	1
PMID:24269235	1
PMID:24299031	1
PMID:24332177	1
PMID:24348888	1
PMID:24379351	1
PMID:24382322	1
PMID:24389203	1
PMID:24477565	1
PMID:2468995	1
PMID:24763282	1
PMID:2479822	1
PMID:24815547	1
PMID:24866380	1
PMID:24875419	1
PMID:24899578	1
PMID:24968361	1
PMID:25032857	1
PMID:25092869	1
PMID:25179629	1
PMID:25196122	1
PMID:25238230	1
PMID:25271810	1
PMID:2536160	1
PMID:25371204	1
PMID:2540188	1
PMID:25421094	1
PMID:2547598	1
PMID:25476002	1
PMID:2547779	1
PMID:25480529	1
PMID:25485533	1
PMID:25510553	1
PMID:2564317	1
PMID:25694435	1
PMID:25782671	1
PMID:2580830	1
PMID:25860031	1
PMID:25875015	1
PMID:25913741	1
PMID:26016667	1
PMID:26149409	1
PMID:26200491	1
PMID:26201802	1
PMID:26271992	1
PMID:26296469	1
PMID:26343999	1
PMID:26389665	1
PMID:26404484	1
PMID:26458913	1
PMID:26462627	1
PMID:26467040	1
PMID:26503787	1
PMID:26553150	1
PMID:26622774	1
PMID:26807528	1
PMID:26815508	1
PMID:26928806	1
PMID:2711183	1
PMID:27287812	1
PMID:27292645	1
PMID:27300003	1
PMID:2736625	1
PMID:27447537	1
PMID:27455076	1
PMID:2747632	1
PMID:27492765	1
PMID:27539513	1
[truncated: 221 more rows]

## Sheet: S2D_biologicalregions2features
Supplemental Table S2D. Human AR 109.20201120 and mouse AR 109 biological regions with categorizations based on feature counts and/or large-scale study derivation.
Description	Count for human	% human	Count for mouse	% mouse
Number of biological regions	4450	1	889	1
Biological regions with single features	3415	0.767416	703	0.790776
Biological regions with multiple features	1035	0.232584	186	0.209224
Biological regions with >=10 features	130	0.0292135	50	0.056243
Biological regions with at least one feature from a large-scale study*	3895	0.875281	638	0.71766
Single-feature biological regions based on a large-scale study*	3249	0.730112	625	0.703037
* Based on the publications supporting >50 features in Supplemental Table S2C
