# Supplementary material for: RefSeq Functional Elements as experimentally assayed nongenic reference standards and functional interactions in human and mouse
Source: HighWire-hosted journal article supplement (doi:10.1101/gr.275819.121), 2021-12-07
Supplement: Supplemental_Table_S3.xlsx [file Supplemental_Table_S3.xlsx]

## Sheet: S3A_location_overlap_stats
Supplemental Table S3A. Statistics for RefSeq Functional Element feature overlaps with genomic subregions from human AR 109.20201120 and mouse AR 109.
Genomic subregion	Called overlap count1	Unrestricted overlap count2	p-value3	Jaccard stat4	Min degree of overlap5	Max degree of overlap6	Av degree of overlap7	Degree of overlap StdDev8
Human AR 109.20201120 subregions:
Whole gene range	5305	5468	1.4345e-08	0.00207694	0.000739235	1	0.904975	0.248479
Exon	1625	2084	0	0.00327835	0.000739235	1	0.480565	0.373784
Intron	3680	4373	2.474e-15	0.00195586	0.00047536	1	0.902563	0.230147
CDS	425	743	6.1364e-66	0.00227742	0.000264061	1	0.315092	0.347593
UTR	1200	1735	0	0.00351842	0.000111882	1	0.442296	0.37539
Whole intergenic	4557	5235	1.045e-32	0.00159324	0.0065023	1	0.938604	0.179689
Gene 5'-proximal intergenic	1350	1906	0	0.00895725	0.0140905	1	0.834743	0.267779
Gene 5'-distal intergenic	3207	3485	6.7488e-127	0.00139077	0.00472654	1	0.953393	0.17293
All subregions9, all feature classes	9862	25029	range above	range above	0.000111882	1	0.828059	0.315082
All subregions9, all regulatory class features	6200	16242	range above	range above	0.000331785	1	0.798498	0.333053
All subregions9, all recombination class features	926	2608	range above	range above	0.000111882	1	0.755097	0.359043
All subregions9, all protein_bind class features	1379	2996	range above	range above	0.0428571	1	0.967218	0.141524
All subregions9, all other class features	1357	3183	range above	range above	0.00153669	1	0.907701	0.238389
Mouse AR 109 subregions:
Whole gene range	1200	1249	2.3282e-14	0.00096921	0.000597729	1	0.894857	0.262605
Exon	369	502	3.3634e-38	0.00130513	0.000597729	1	0.466922	0.388572
Intron	831	981	0.037199	0.00092669	0.0181635	1	0.900389	0.236674
CDS	29	97	2.146e-15	0.000329234	0.00044964	1	0.171452	0.287507
UTR	340	459	9.4166e-106	0.00166755	0.00170394	1	0.474431	0.387868
Whole intergenic	1071	1237	0.0075865	0.000692018	0.00100553	1	0.932355	0.194097
Gene 5'-proximal intergenic	464	578	0	0.00325057	0.0199501	1	0.878305	0.23822
Gene 5'-distal intergenic	607	707	4.0828e-80	0.000633157	0.00100553	1	0.913244	0.233151
All subregions9, all feature classes	2271	5810	range above	range above	0.00044964	1	0.822099	0.323084
All subregions9, all regulatory class features	1472	4052	range above	range above	0.00044964	1	0.761773	0.35658
All subregions9, all protein_bind class features	690	1503	range above	range above	0.025641	1	0.968274	0.139171
All subregions9, all other class features	109	255	range above	range above	0.0596154	1	0.919112	0.225603
1RefSeqFE feature count for called overlaps based on serial intersections requiring at least 10% of RefSeqFE feature overlap, with call preferences for gene>intergenic, exon>intron, CDS>UTR and gene 5'-proximal>gene 5'-distal, as described in Supplemental Material and represented in Figure 5A,B and Supplemental Table S3B,C, column E.
2RefSeqFE feature count for all intersections with the indicated subregion with no restrictions or calls, hence higher counts expected than for called overlaps due to multi-location overlaps
3Fisher two-tailed p-value based on all RefSeqFE feature intersections with no restrictions or calls
4Jaccard statistic based on all RefSeqFE feature intersections with no restrictions or calls
5Minimum value for degree of overlap (overlap length/RefSeqFE feature length) based on all RefSeqFE feature intersections with no restrictions or calls
6Maximum value for degree of overlap (overlap length/RefSeqFE feature length) based on all RefSeqFE feature intersections with no restrictions or calls
7Average value for degree of overlap (overlap length/RefSeqFE feature length) based on all RefSeqFE feature intersections with no restrictions or calls
8Standard deviation from the mean for degree of overlap (overlap length/RefSeqFE feature length) based on all RefSeqFE feature intersections with no restrictions or calls
9Based on intersections with each subregion carried out separately (hence p-value and Jaccard statistic ranges as in the rows above), then accumulating all results, followed by degree of overlap determination for either all features or mined out feature classes

## Sheet: S3B_Human_AR109.20201120_feats
Supplemental Table S3B. Human AR 109.20201120 RefSeq Functional Element features (columns 1-4 in BED format), gene-relative locations, overlapping genes and datasets (if applicable), and associated RefSeq accessions.
Chromosome	Start	Stop	Feature name (SO_type and GeneID)	Gene-relative location	Overlapping gene information	Datasets with overlapping features	NG_ accession	Organism
NC_000001.11	1069211	1069326	RefSeqFE_enhancer_GeneID:106783496	UTR-overlapping,exon-overlapping,gene-overlapping	lncRNA_GeneID:105378948_LOC105378948	ENCODEcCRE,dbSUPER	NG_046080.1	Homo_sapiens
NC_000001.11	1112508	1112803	RefSeqFE_enhancer_GeneID:112577469	gene-overlapping,intronic	protein_coding_GeneID:54991_C1orf159	.	NG_060033.1	Homo_sapiens
NC_000001.11	1134849	1135934	RefSeqFE_transcriptional_cis_regulatory_region_GeneID:115801415	intergenic_gene_5prime-proximal	.	ENCODEcCRE,FANTOM5,dbSUPER	NG_066073.1	Homo_sapiens
NC_000001.11	1287379	1288916	RefSeqFE_meiotic_recombination_region_GeneID:110599576	CDS-overlapping,exon-overlapping,gene-overlapping	protein_coding_GeneID:6339_SCNN1D	ENCODEcCRE,Ensembl104	NG_055440.1	Homo_sapiens
NC_000001.11	1288007	1290297	RefSeqFE_repeat_instability_region_GeneID:110599576	gene-overlapping,intronic	protein_coding_GeneID:6339_SCNN1D	ENCODEcCRE,Ensembl104	NG_055440.1	Homo_sapiens
NC_000001.11	1288179	1288192	RefSeqFE_nucleotide_motif_GeneID:110599576	gene-overlapping,intronic	protein_coding_GeneID:6339_SCNN1D	.	NG_055440.1	Homo_sapiens
NC_000001.11	1288199	1290253	RefSeqFE_tandem_repeat_GeneID:110599576	gene-overlapping,intronic	protein_coding_GeneID:6339_SCNN1D	ENCODEcCRE,Ensembl104	NG_055440.1	Homo_sapiens
NC_000001.11	1289306	1291600	RefSeqFE_meiotic_recombination_region_GeneID:110599576	CDS-overlapping,exon-overlapping,gene-overlapping	protein_coding_GeneID:6339_SCNN1D	ENCODEcCRE,Ensembl104,dbSUPER	NG_055440.1	Homo_sapiens
NC_000001.11	1290255	1290268	RefSeqFE_nucleotide_motif_GeneID:110599576	gene-overlapping,intronic	protein_coding_GeneID:6339_SCNN1D	ENCODEcCRE,Ensembl104	NG_055440.1	Homo_sapiens
NC_000001.11	1290849	1290862	RefSeqFE_nucleotide_motif_GeneID:110599576	gene-overlapping,intronic	protein_coding_GeneID:6339_SCNN1D	Ensembl104,dbSUPER	NG_055440.1	Homo_sapiens
NC_000001.11	1290911	1290927	RefSeqFE_nucleotide_motif_GeneID:110599576	CDS-overlapping,exon-overlapping,gene-overlapping	protein_coding_GeneID:6339_SCNN1D	Ensembl104,dbSUPER	NG_055440.1	Homo_sapiens
NC_000001.11	2255789	2256084	RefSeqFE_enhancer_GeneID:112577524	gene-overlapping,intronic	protein_coding_GeneID:6497_SKI[ClinVar_submission_gene,RSG_gene]	ENCODEcCRE,Ensembl104,dbSUPER	NG_060443.1	Homo_sapiens
NC_000001.11	2391549	2391844	RefSeqFE_enhancer_GeneID:112577525	intergenic_gene_5prime-proximal	.	ENCODEcCRE,Ensembl104	NG_060444.1	Homo_sapiens
NC_000001.11	3240944	3241239	RefSeqFE_enhancer_GeneID:112577578	gene-overlapping,intronic	protein_coding_GeneID:63976_PRDM16[ClinVar_submission_gene,RSG_gene]	Ensembl104,dbSUPER	NG_060494.1	Homo_sapiens
NC_000001.11	3274016	3274864	RefSeqFE_enhancer_GeneID:110120751	gene-overlapping,intronic	protein_coding_GeneID:63976_PRDM16[ClinVar_submission_gene,RSG_gene]	VISTA,dbSUPER	NG_053376.1	Homo_sapiens
NC_000001.11	3313184	3313479	RefSeqFE_enhancer_GeneID:112577579	UTR-overlapping,exon-overlapping,gene-overlapping	lncRNA_GeneID:105378604_LOC105378604[ClinVar_submission_gene,RSG_gene],protein_coding_GeneID:63976_PRDM16[ClinVar_submission_gene,RSG_gene]	ENCODEcCRE,FANTOM5,dbSUPER	NG_060495.1	Homo_sapiens
NC_000001.11	3345528	3349801	RefSeqFE_enhancer_GeneID:110121223	gene-overlapping,intronic	protein_coding_GeneID:63976_PRDM16[ClinVar_submission_gene,RSG_gene]	ENCODEcCRE,Ensembl104,VISTA,dbSUPER	NG_053838.1	Homo_sapiens
NC_000001.11	3503968	3504669	RefSeqFE_enhancer_GeneID:108281140	gene-overlapping,intronic	protein_coding_GeneID:1953_MEGF6	ENCODEcCRE,Ensembl104,FANTOM5,dbSUPER	NG_051096.1	Homo_sapiens
NC_000001.11	3504196	3504501	RefSeqFE_CAGE_cluster_GeneID:108281140	gene-overlapping,intronic	protein_coding_GeneID:1953_MEGF6	ENCODEcCRE,Ensembl104,FANTOM5,dbSUPER	NG_051096.1	Homo_sapiens
NC_000001.11	3796384	3796679	RefSeqFE_enhancer_GeneID:112577581	CDS-overlapping,exon-overlapping,gene-overlapping	protein_coding_GeneID:57470_LRRC47	ENCODEcCRE,Ensembl104	NG_060497.1	Homo_sapiens
NC_000001.11	5742550	5743135	RefSeqFE_DNAseI_hypersensitive_site_GeneID:108281186	intergenic_gene_5prime-distal	.	Ensembl104	NG_051146.1	Homo_sapiens
NC_000001.11	5742550	5743135	RefSeqFE_enhancer_GeneID:108281186	intergenic_gene_5prime-distal	.	Ensembl104	NG_051146.1	Homo_sapiens
NC_000001.11	6127708	6128003	RefSeqFE_enhancer_GeneID:112590813	gene-overlapping,intronic	protein_coding_GeneID:26038_CHD5	ENCODEcCRE,Ensembl104	NG_060603.1	Homo_sapiens
NC_000001.11	8070378	8071827	RefSeqFE_enhancer_GeneID:110121213	intergenic_gene_5prime-distal	.	ENCODEcCRE,Ensembl104,VISTA,dbSUPER	NG_053829.1	Homo_sapiens
NC_000001.11	8165708	8166003	RefSeqFE_enhancer_GeneID:112590821	intergenic_gene_5prime-distal	.	ENCODEcCRE,Ensembl104,dbSUPER	NG_060611.1	Homo_sapiens
NC_000001.11	8173055	8173586	RefSeqFE_enhancer_GeneID:108281189	intergenic_gene_5prime-distal	.	ENCODEcCRE,Ensembl104,dbSUPER	NG_051149.1	Homo_sapiens
NC_000001.11	8173278	8173375	RefSeqFE_epigenetically_modified_region_GeneID:108281189	intergenic_gene_5prime-distal	.	Ensembl104,dbSUPER	NG_051149.1	Homo_sapiens
NC_000001.11	8211968	8212263	RefSeqFE_enhancer_GeneID:112590822	gene-overlapping,intronic	lncRNA_GeneID:102724539_LINC01714	ENCODEcCRE,FANTOM5,dbSUPER	NG_060612.1	Homo_sapiens
NC_000001.11	8817589	8817884	RefSeqFE_enhancer_GeneID:112590823	UTR-overlapping,exon-overlapping,gene-overlapping	protein_coding_GeneID:473_RERE[ClinVar_submission_gene,RSG_gene]	ENCODEcCRE,Ensembl104	NG_060613.1	Homo_sapiens
NC_000001.11	9371067	9372775	RefSeqFE_enhancer_GeneID:110121160	intergenic_gene_5prime-distal	.	ENCODEcCRE,VISTA,dbSUPER	NG_053778.1	Homo_sapiens
NC_000001.11	9593910	9594205	RefSeqFE_enhancer_GeneID:112590825	gene-overlapping,intronic	protein_coding_GeneID:199953_TMEM201	ENCODEcCRE,Ensembl104	NG_060615.1	Homo_sapiens
NC_000001.11	9593910	9594205	RefSeqFE_silencer_GeneID:112590825	gene-overlapping,intronic	protein_coding_GeneID:199953_TMEM201	ENCODEcCRE,Ensembl104	NG_060615.1	Homo_sapiens
NC_000001.11	9627497	9627962	RefSeqFE_enhancer_GeneID:106783575	intergenic_gene_5prime-distal	.	ENCODEcCRE,Ensembl104,dbSUPER	NG_046127.1	Homo_sapiens
NC_000001.11	10672012	10673061	RefSeqFE_enhancer_GeneID:110120648	gene-overlapping,intronic	protein_coding_GeneID:54897_CASZ1	Ensembl104,VISTA,dbSUPER	NG_053274.1	Homo_sapiens
NC_000001.11	10721181	10721687	RefSeqFE_enhancer_GeneID:110120666	gene-overlapping,intronic	protein_coding_GeneID:54897_CASZ1	ENCODEcCRE,Ensembl104,VISTA,dbSUPER	NG_053292.1	Homo_sapiens
NC_000001.11	10735048	10739184	RefSeqFE_enhancer_GeneID:110121258	gene-overlapping,intronic	protein_coding_GeneID:54897_CASZ1	ENCODEcCRE,VISTA,dbSUPER	NG_053873.1	Homo_sapiens
NC_000001.11	10791512	10792116	RefSeqFE_enhancer_GeneID:110120672	gene-overlapping,intronic	protein_coding_GeneID:54897_CASZ1	ENCODEcCRE,Ensembl104,VISTA,dbSUPER	NG_053298.1	Homo_sapiens
NC_000001.11	10905071	10906087	RefSeqFE_enhancer_GeneID:110120623	intergenic_gene_5prime-distal	.	ENCODEcCRE,VISTA	NG_053250.1	Homo_sapiens
NC_000001.11	11846818	11848609	RefSeqFE_enhancer_GeneID:114827827	CDS-overlapping,exon-overlapping,gene-overlapping	antisense_RNA_GeneID:100379251_NPPA-AS1[ClinVar_submission_gene,LRG_gene,RSG_gene],protein_coding_GeneID:4878_NPPA[ClinVar_submission_gene,LRG_gene,RSG_gene]	Ensembl104,VISTA	NG_065183.1	Homo_sapiens
NC_000001.11	11885470	11889433	RefSeqFE_enhancer_GeneID:110121260	intergenic_gene_5prime-distal	.	ENCODEcCRE,Ensembl104,FANTOM5,VISTA,dbSUPER	NG_053875.1	Homo_sapiens
NC_000001.11	11926351	11926646	RefSeqFE_enhancer_GeneID:112577472	UTR-overlapping,exon-overlapping,gene-overlapping	protein_coding_GeneID:90231_KIAA2013	ENCODEcCRE,Ensembl104,dbSUPER	NG_060036.1	Homo_sapiens
NC_000001.11	11944311	11944606	RefSeqFE_enhancer_GeneID:112577486	CDS-overlapping,exon-overlapping,gene-overlapping	protein_coding_GeneID:5351_PLOD1[ClinVar_submission_gene,RSG_gene]	ENCODEcCRE,Ensembl104,dbSUPER	NG_060048.1	Homo_sapiens
NC_000001.11	12038248	12039371	RefSeqFE_transcriptional_cis_regulatory_region_GeneID:115801416	intergenic_gene_5prime-distal	.	ENCODEcCRE,Ensembl104,dbSUPER	NG_066074.1	Homo_sapiens
NC_000001.11	12433486	12433631	RefSeqFE_enhancer_GeneID:111591499	gene-overlapping,intronic	protein_coding_GeneID:55187_VPS13D[ClinVar_submission_gene,LRG_gene,RSG_gene]	ENCODEcCRE,FANTOM5,dbSUPER	NG_056090.1	Homo_sapiens
NC_000001.11	12433553	12433564	RefSeqFE_transcriptional_cis_regulatory_region_GeneID:111591499	gene-overlapping,intronic	protein_coding_GeneID:55187_VPS13D[ClinVar_submission_gene,LRG_gene,RSG_gene]	ENCODEcCRE,FANTOM5,dbSUPER	NG_056090.1	Homo_sapiens
NC_000001.11	12541562	12541857	RefSeqFE_enhancer_GeneID:112577487	intergenic_gene_5prime-distal	.	ENCODEcCRE,dbSUPER	NG_060049.1	Homo_sapiens
NC_000001.11	12573880	12574175	RefSeqFE_enhancer_GeneID:112577488	gene-overlapping,intronic	protein_coding_GeneID:9249_DHRS3	ENCODEcCRE,Ensembl104,dbSUPER	NG_060050.1	Homo_sapiens
NC_000001.11	14952772	14953067	RefSeqFE_enhancer_GeneID:112577491	gene-overlapping,intronic	protein_coding_GeneID:23254_KAZN[RSG_gene]	ENCODEcCRE,Ensembl104,dbSUPER	NG_060057.1	Homo_sapiens
NC_000001.11	15800233	15800528	RefSeqFE_enhancer_GeneID:112577504	intergenic_gene_5prime-distal	.	ENCODEcCRE,Ensembl104,dbSUPER	NG_060220.1	Homo_sapiens
NC_000001.11	15893297	15893442	RefSeqFE_enhancer_GeneID:111562380	gene-overlapping,intronic	protein_coding_GeneID:23013_SPEN[ClinVar_submission_gene,RSG_gene]	ENCODEcCRE,Ensembl104,dbSUPER	NG_056075.1	Homo_sapiens
NC_000001.11	15893364	15893375	RefSeqFE_transcriptional_cis_regulatory_region_GeneID:111562380	gene-overlapping,intronic	protein_coding_GeneID:23013_SPEN[ClinVar_submission_gene,RSG_gene]	ENCODEcCRE,Ensembl104,dbSUPER	NG_056075.1	Homo_sapiens
NC_000001.11	16023928	16024762	RefSeqFE_non_allelic_homologous_recombination_region_GeneID:106501712	gene-overlapping,intronic	protein_coding_GeneID:1187_CLCNKA[ClinVar_submission_gene,RSG_gene]	.	NG_042864.1	Homo_sapiens
NC_000001.11	16029800	16029964	RefSeqFE_non_allelic_homologous_recombination_region_GeneID:106501712	gene-overlapping,intronic	protein_coding_GeneID:1187_CLCNKA[ClinVar_submission_gene,RSG_gene]	.	NG_042864.1	Homo_sapiens
NC_000001.11	16034050	16036205	RefSeqFE_non_allelic_homologous_recombination_region_GeneID:106501712	UTR-overlapping,exon-overlapping,gene-overlapping	pseudogene_GeneID:440568_LOC440568	.	NG_042864.1	Homo_sapiens
NC_000001.11	16044592	16045557	RefSeqFE_non_allelic_homologous_recombination_region_GeneID:106501713	gene-overlapping,intronic	protein_coding_GeneID:1188_CLCNKB[ClinVar_submission_gene,RSG_gene]	Ensembl104	NG_042865.1	Homo_sapiens
NC_000001.11	16051375	16054065	RefSeqFE_meiotic_recombination_region_GeneID:106501713	gene-overlapping,intronic	protein_coding_GeneID:1188_CLCNKB[ClinVar_submission_gene,RSG_gene]	Ensembl104	NG_042865.1	Homo_sapiens
NC_000001.11	16051499	16051520	RefSeqFE_nucleotide_motif_GeneID:106501713	CDS-overlapping,exon-overlapping,gene-overlapping	protein_coding_GeneID:1188_CLCNKB[ClinVar_submission_gene,RSG_gene]	.	NG_042865.1	Homo_sapiens
NC_000001.11	16051547	16051709	RefSeqFE_non_allelic_homologous_recombination_region_GeneID:106501713	gene-overlapping,intronic	protein_coding_GeneID:1188_CLCNKB[ClinVar_submission_gene,RSG_gene]	.	NG_042865.1	Homo_sapiens
NC_000001.11	16052513	16054065	RefSeqFE_meiotic_recombination_region_GeneID:106501713	gene-overlapping,intronic	protein_coding_GeneID:1188_CLCNKB[ClinVar_submission_gene,RSG_gene]	Ensembl104	NG_042865.1	Homo_sapiens
NC_000001.11	16053402	16053415	RefSeqFE_nucleotide_motif_GeneID:106501713	gene-overlapping,intronic	protein_coding_GeneID:1188_CLCNKB[ClinVar_submission_gene,RSG_gene]	.	NG_042865.1	Homo_sapiens
NC_000001.11	16057308	16059459	RefSeqFE_non_allelic_homologous_recombination_region_GeneID:106501713	CDS-overlapping,exon-overlapping,gene-overlapping	protein_coding_GeneID:348487_FAM131C	Ensembl104	NG_042865.1	Homo_sapiens
NC_000001.11	16162433	16162728	RefSeqFE_enhancer_GeneID:112577505	UTR-overlapping,exon-overlapping,gene-overlapping	lncRNA_GeneID:101927479_LOC101927479	ENCODEcCRE,FANTOM5,dbSUPER	NG_060221.1	Homo_sapiens
NC_000001.11	18630529	18631315	RefSeqFE_promoter_GeneID:108254694	UTR-overlapping,exon-overlapping,gene-overlapping	protein_coding_GeneID:5081_PAX7[RSG_gene]	ENCODEcCRE,Ensembl104,dbSUPER	NG_051041.1	Homo_sapiens
NC_000001.11	18630718	18631629	RefSeqFE_promoter_GeneID:108254694	UTR-overlapping,exon-overlapping,gene-overlapping	protein_coding_GeneID:5081_PAX7[RSG_gene]	ENCODEcCRE,Ensembl104,dbSUPER	NG_051041.1	Homo_sapiens
NC_000001.11	18631352	18631629	RefSeqFE_promoter_GeneID:108254694	UTR-overlapping,exon-overlapping,gene-overlapping	protein_coding_GeneID:5081_PAX7[RSG_gene]	ENCODEcCRE,Ensembl104,dbSUPER	NG_051041.1	Homo_sapiens
NC_000001.11	18632168	18633682	RefSeqFE_enhancer_GeneID:108175348	gene-overlapping,intronic	protein_coding_GeneID:5081_PAX7[RSG_gene]	ENCODEcCRE,Ensembl104,VISTA,dbSUPER	NG_050921.1	Homo_sapiens
NC_000001.11	18632176	18633790	RefSeqFE_enhancer_GeneID:108175348	gene-overlapping,intronic	protein_coding_GeneID:5081_PAX7[RSG_gene]	ENCODEcCRE,Ensembl104,VISTA,dbSUPER	NG_050921.1	Homo_sapiens
NC_000001.11	18632688	18632929	RefSeqFE_conserved_region_GeneID:108175348	gene-overlapping,intronic	protein_coding_GeneID:5081_PAX7[RSG_gene]	ENCODEcCRE,Ensembl104,VISTA,dbSUPER	NG_050921.1	Homo_sapiens
NC_000001.11	18632856	18633060	RefSeqFE_conserved_region_GeneID:108175348	gene-overlapping,intronic	protein_coding_GeneID:5081_PAX7[RSG_gene]	ENCODEcCRE,Ensembl104,VISTA,dbSUPER	NG_050921.1	Homo_sapiens
NC_000001.11	18941274	18941569	RefSeqFE_enhancer_GeneID:111828503	gene-overlapping,intronic	protein_coding_GeneID:126917_IFFO2	ENCODEcCRE,dbSUPER	NG_056231.1	Homo_sapiens
NC_000001.11	18941294	18941589	RefSeqFE_enhancer_GeneID:111828503	gene-overlapping,intronic	protein_coding_GeneID:126917_IFFO2	ENCODEcCRE,dbSUPER	NG_056231.1	Homo_sapiens
NC_000001.11	21022399	21022544	RefSeqFE_enhancer_GeneID:111501793	gene-overlapping,intronic	protein_coding_GeneID:8672_EIF4G3[ClinVar_submission_gene,RSG_gene]	ENCODEcCRE	NG_055948.1	Homo_sapiens
NC_000001.11	21022466	21022477	RefSeqFE_transcriptional_cis_regulatory_region_GeneID:111501793	gene-overlapping,intronic	protein_coding_GeneID:8672_EIF4G3[ClinVar_submission_gene,RSG_gene]	ENCODEcCRE	NG_055948.1	Homo_sapiens
NC_000001.11	22611455	22611750	RefSeqFE_silencer_GeneID:113939986	intergenic_gene_5prime-distal	.	Ensembl104,dbSUPER	NG_063765.1	Homo_sapiens
NC_000001.11	23356778	23357008	RefSeqFE_enhancer_blocking_element_GeneID:111721714	intergenic_gene_5prime-distal	.	Ensembl104	NG_056158.1	Homo_sapiens
NC_000001.11	23356833	23356967	RefSeqFE_mobile_genetic_element_GeneID:111721714	intergenic_gene_5prime-distal	.	Ensembl104	NG_056158.1	Homo_sapiens
NC_000001.11	23544737	23545032	RefSeqFE_enhancer_GeneID:112577550	intergenic_gene_5prime-distal	.	ENCODEcCRE,Ensembl104,dbSUPER	NG_060469.1	Homo_sapiens
NC_000001.11	24365218	24365513	RefSeqFE_enhancer_GeneID:112577563	gene-overlapping,intronic	protein_coding_GeneID:90529_STPG1	ENCODEcCRE,Ensembl104,FANTOM5,dbSUPER	NG_060479.1	Homo_sapiens
NC_000001.11	24541058	24541353	RefSeqFE_enhancer_GeneID:112577564	gene-overlapping,intronic	lncRNA_GeneID:100506985_NCMAP-DT	ENCODEcCRE,dbSUPER	NG_060480.1	Homo_sapiens
NC_000001.11	24720117	24720412	RefSeqFE_enhancer_GeneID:112577570	intergenic_gene_5prime-distal	.	ENCODEcCRE,Ensembl104,dbSUPER	NG_060486.1	Homo_sapiens
NC_000001.11	25022138	25023701	RefSeqFE_enhancer_GeneID:109851610	intergenic_gene_5prime-proximal	.	ENCODEcCRE,Ensembl104,FANTOM5,dbSUPER	NG_052963.1	Homo_sapiens
NC_000001.11	25895417	25895712	RefSeqFE_enhancer_GeneID:112577571	gene-overlapping,intronic	protein_coding_GeneID:3925_STMN1	ENCODEcCRE,Ensembl104,dbSUPER	NG_060487.1	Homo_sapiens
NC_000001.11	25933355	25934013	RefSeqFE_transcriptional_cis_regulatory_region_GeneID:115801417	intergenic_gene_5prime-distal	.	ENCODEcCRE,dbSUPER	NG_066075.1	Homo_sapiens
NC_000001.11	26093361	26098252	RefSeqFE_enhancer_GeneID:110121289	intergenic_gene_5prime-distal	.	ENCODEcCRE,Ensembl104,FANTOM5,VISTA,dbSUPER	NG_053904.1	Homo_sapiens
NC_000001.11	26378037	26378931	RefSeqFE_transcriptional_cis_regulatory_region_GeneID:115801418	intergenic_gene_5prime-distal	.	ENCODEcCRE,Ensembl104	NG_066076.1	Homo_sapiens
NC_000001.11	26508575	26508796	RefSeqFE_transcriptional_cis_regulatory_region_GeneID:115801419	intergenic_gene_5prime-distal	.	Ensembl104	NG_066077.1	Homo_sapiens
NC_000001.11	26723099	26724341	RefSeqFE_enhancer_GeneID:107988049	gene-overlapping,intronic	protein_coding_GeneID:8289_ARID1A[ClinVar_submission_gene,LRG_gene,RSG_gene]	ENCODEcCRE,Ensembl104,VISTA,dbSUPER	NG_050810.1	Homo_sapiens
NC_000001.11	26723128	26724414	RefSeqFE_enhancer_GeneID:107988049	gene-overlapping,intronic	protein_coding_GeneID:8289_ARID1A[ClinVar_submission_gene,LRG_gene,RSG_gene]	ENCODEcCRE,Ensembl104,VISTA,dbSUPER	NG_050810.1	Homo_sapiens
NC_000001.11	26990677	26990972	RefSeqFE_enhancer_GeneID:112577572	intergenic_gene_5prime-distal	.	ENCODEcCRE,dbSUPER	NG_060488.1	Homo_sapiens
NC_000001.11	26997677	26997972	RefSeqFE_enhancer_GeneID:112577573	gene-overlapping,intronic	protein_coding_GeneID:388610_TRNP1	ENCODEcCRE,Ensembl104,dbSUPER	NG_060489.1	Homo_sapiens
NC_000001.11	27122657	27122952	RefSeqFE_enhancer_GeneID:112577574	gene-overlapping,intronic	protein_coding_GeneID:6548_SLC9A1[ClinVar_submission_gene,RSG_gene]	ENCODEcCRE,dbSUPER	NG_060490.1	Homo_sapiens
NC_000001.11	27867112	27867634	RefSeqFE_transcriptional_cis_regulatory_region_GeneID:115801420	intergenic_gene_5prime-distal	.	ENCODEcCRE,dbSUPER	NG_066078.1	Homo_sapiens
NC_000001.11	28369517	28369812	RefSeqFE_enhancer_GeneID:112577575	UTR-overlapping,exon-overlapping,gene-overlapping	protein_coding_GeneID:65979_PHACTR4	ENCODEcCRE,Ensembl104	NG_060491.1	Homo_sapiens
NC_000001.11	28552796	28553091	RefSeqFE_enhancer_GeneID:112577576	intergenic_gene_5prime-proximal	.	ENCODEcCRE,Ensembl104	NG_060492.1	Homo_sapiens
NC_000001.11	28775156	28775451	RefSeqFE_enhancer_GeneID:112577577	intergenic_gene_5prime-distal	.	ENCODEcCRE,FANTOM5	NG_060493.1	Homo_sapiens
NC_000001.11	28883747	28884318	RefSeqFE_transcriptional_cis_regulatory_region_GeneID:111501765	intergenic_gene_5prime-distal	.	ENCODEcCRE,Ensembl104,dbSUPER	NG_055933.2	Homo_sapiens
NC_000001.11	28884044	28884189	RefSeqFE_enhancer_GeneID:111501765	intergenic_gene_5prime-distal	.	ENCODEcCRE,Ensembl104,dbSUPER	NG_055933.2	Homo_sapiens
NC_000001.11	28884107	28884125	RefSeqFE_transcriptional_cis_regulatory_region_GeneID:111501765	intergenic_gene_5prime-distal	.	ENCODEcCRE,Ensembl104,dbSUPER	NG_055933.2	Homo_sapiens
NC_000001.11	28884561	28885466	RefSeqFE_transcriptional_cis_regulatory_region_GeneID:115801421	intergenic_gene_5prime-proximal	.	ENCODEcCRE,Ensembl104,FANTOM5,dbSUPER	NG_066079.1	Homo_sapiens
NC_000001.11	29313136	29313431	RefSeqFE_silencer_GeneID:113939988	gene-overlapping,intronic	protein_coding_GeneID:10076_PTPRU[ClinVar_submission_gene,RSG_gene]	ENCODEcCRE,Ensembl104	NG_063767.1	Homo_sapiens
NC_000001.11	30777480	30778146	RefSeqFE_transcriptional_cis_regulatory_region_GeneID:115801422	gene-overlapping,intronic	lncRNA_GeneID:105378621_LOC105378621	ENCODEcCRE,Ensembl104,FANTOM5,dbSUPER	NG_066080.1	Homo_sapiens
NC_000001.11	30779459	30779984	RefSeqFE_transcriptional_cis_regulatory_region_GeneID:115801423	gene-overlapping,intronic	lncRNA_GeneID:105378621_LOC105378621	ENCODEcCRE,Ensembl104,dbSUPER	NG_066081.1	Homo_sapiens
NC_000001.11	31428805	31434663	RefSeqFE_meiotic_recombination_region_GeneID:110594336	UTR-overlapping,exon-overlapping,gene-overlapping	protein_coding_GeneID:347735_SERINC2	ENCODEcCRE,Ensembl104,dbSUPER	NG_055425.1	Homo_sapiens
NC_000001.11	31429571	31434255	RefSeqFE_meiotic_recombination_region_GeneID:110594336	gene-overlapping,intronic	protein_coding_GeneID:347735_SERINC2	ENCODEcCRE,Ensembl104,dbSUPER	NG_055425.1	Homo_sapiens
NC_000001.11	31430127	31430143	RefSeqFE_nucleotide_motif_GeneID:110594336	gene-overlapping,intronic	protein_coding_GeneID:347735_SERINC2	dbSUPER	NG_055425.1	Homo_sapiens
NC_000001.11	31431103	31431119	RefSeqFE_nucleotide_motif_GeneID:110594336	gene-overlapping,intronic	protein_coding_GeneID:347735_SERINC2	dbSUPER	NG_055425.1	Homo_sapiens
NC_000001.11	31431433	31432680	RefSeqFE_repeat_instability_region_GeneID:110594336	gene-overlapping,intronic	protein_coding_GeneID:347735_SERINC2	ENCODEcCRE,Ensembl104,dbSUPER	NG_055425.1	Homo_sapiens
NC_000001.11	31431438	31433394	RefSeqFE_meiotic_recombination_region_GeneID:110594336	CDS-overlapping,exon-overlapping,gene-overlapping	protein_coding_GeneID:347735_SERINC2	ENCODEcCRE,Ensembl104,dbSUPER	NG_055425.1	Homo_sapiens
NC_000001.11	31431748	31432232	RefSeqFE_minisatellite_GeneID:110594336	gene-overlapping,intronic	protein_coding_GeneID:347735_SERINC2	ENCODEcCRE,Ensembl104,dbSUPER	NG_055425.1	Homo_sapiens
NC_000001.11	31431754	31431767	RefSeqFE_nucleotide_motif_GeneID:110594336	gene-overlapping,intronic	protein_coding_GeneID:347735_SERINC2	Ensembl104,dbSUPER	NG_055425.1	Homo_sapiens
NC_000001.11	31431781	31431794	RefSeqFE_nucleotide_motif_GeneID:110594336	gene-overlapping,intronic	protein_coding_GeneID:347735_SERINC2	Ensembl104,dbSUPER	NG_055425.1	Homo_sapiens
NC_000001.11	31431799	31431812	RefSeqFE_nucleotide_motif_GeneID:110594336	gene-overlapping,intronic	protein_coding_GeneID:347735_SERINC2	Ensembl104,dbSUPER	NG_055425.1	Homo_sapiens
NC_000001.11	31431817	31431830	RefSeqFE_nucleotide_motif_GeneID:110594336	gene-overlapping,intronic	protein_coding_GeneID:347735_SERINC2	Ensembl104,dbSUPER	NG_055425.1	Homo_sapiens
NC_000001.11	31431835	31431848	RefSeqFE_nucleotide_motif_GeneID:110594336	gene-overlapping,intronic	protein_coding_GeneID:347735_SERINC2	Ensembl104,dbSUPER	NG_055425.1	Homo_sapiens
NC_000001.11	31431853	31431866	RefSeqFE_nucleotide_motif_GeneID:110594336	gene-overlapping,intronic	protein_coding_GeneID:347735_SERINC2	Ensembl104,dbSUPER	NG_055425.1	Homo_sapiens
NC_000001.11	31431871	31431884	RefSeqFE_nucleotide_motif_GeneID:110594336	gene-overlapping,intronic	protein_coding_GeneID:347735_SERINC2	Ensembl104,dbSUPER	NG_055425.1	Homo_sapiens
NC_000001.11	31431889	31431902	RefSeqFE_nucleotide_motif_GeneID:110594336	gene-overlapping,intronic	protein_coding_GeneID:347735_SERINC2	Ensembl104,dbSUPER	NG_055425.1	Homo_sapiens
NC_000001.11	31431907	31431920	RefSeqFE_nucleotide_motif_GeneID:110594336	gene-overlapping,intronic	protein_coding_GeneID:347735_SERINC2	Ensembl104,dbSUPER	NG_055425.1	Homo_sapiens
NC_000001.11	31431925	31431938	RefSeqFE_nucleotide_motif_GeneID:110594336	gene-overlapping,intronic	protein_coding_GeneID:347735_SERINC2	Ensembl104,dbSUPER	NG_055425.1	Homo_sapiens
NC_000001.11	31431943	31431956	RefSeqFE_nucleotide_motif_GeneID:110594336	gene-overlapping,intronic	protein_coding_GeneID:347735_SERINC2	Ensembl104,dbSUPER	NG_055425.1	Homo_sapiens
NC_000001.11	31431961	31431974	RefSeqFE_nucleotide_motif_GeneID:110594336	gene-overlapping,intronic	protein_coding_GeneID:347735_SERINC2	Ensembl104,dbSUPER	NG_055425.1	Homo_sapiens
NC_000001.11	31431979	31431992	RefSeqFE_nucleotide_motif_GeneID:110594336	gene-overlapping,intronic	protein_coding_GeneID:347735_SERINC2	Ensembl104,dbSUPER	NG_055425.1	Homo_sapiens
NC_000001.11	31431997	31432010	RefSeqFE_nucleotide_motif_GeneID:110594336	gene-overlapping,intronic	protein_coding_GeneID:347735_SERINC2	Ensembl104,dbSUPER	NG_055425.1	Homo_sapiens
NC_000001.11	31432015	31432028	RefSeqFE_nucleotide_motif_GeneID:110594336	gene-overlapping,intronic	protein_coding_GeneID:347735_SERINC2	ENCODEcCRE,Ensembl104,dbSUPER	NG_055425.1	Homo_sapiens
NC_000001.11	31432033	31432046	RefSeqFE_nucleotide_motif_GeneID:110594336	gene-overlapping,intronic	protein_coding_GeneID:347735_SERINC2	ENCODEcCRE,Ensembl104,dbSUPER	NG_055425.1	Homo_sapiens
NC_000001.11	31432051	31432064	RefSeqFE_nucleotide_motif_GeneID:110594336	gene-overlapping,intronic	protein_coding_GeneID:347735_SERINC2	ENCODEcCRE,Ensembl104,dbSUPER	NG_055425.1	Homo_sapiens
NC_000001.11	31432069	31432082	RefSeqFE_nucleotide_motif_GeneID:110594336	gene-overlapping,intronic	protein_coding_GeneID:347735_SERINC2	ENCODEcCRE,Ensembl104,dbSUPER	NG_055425.1	Homo_sapiens
NC_000001.11	31432087	31432100	RefSeqFE_nucleotide_motif_GeneID:110594336	gene-overlapping,intronic	protein_coding_GeneID:347735_SERINC2	ENCODEcCRE,Ensembl104,dbSUPER	NG_055425.1	Homo_sapiens
NC_000001.11	31432105	31432118	RefSeqFE_nucleotide_motif_GeneID:110594336	gene-overlapping,intronic	protein_coding_GeneID:347735_SERINC2	ENCODEcCRE,Ensembl104,dbSUPER	NG_055425.1	Homo_sapiens
NC_000001.11	31432123	31432136	RefSeqFE_nucleotide_motif_GeneID:110594336	gene-overlapping,intronic	protein_coding_GeneID:347735_SERINC2	ENCODEcCRE,Ensembl104,dbSUPER	NG_055425.1	Homo_sapiens
NC_000001.11	31432141	31432154	RefSeqFE_nucleotide_motif_GeneID:110594336	gene-overlapping,intronic	protein_coding_GeneID:347735_SERINC2	ENCODEcCRE,Ensembl104,dbSUPER	NG_055425.1	Homo_sapiens
NC_000001.11	31432159	31432172	RefSeqFE_nucleotide_motif_GeneID:110594336	gene-overlapping,intronic	protein_coding_GeneID:347735_SERINC2	ENCODEcCRE,Ensembl104,dbSUPER	NG_055425.1	Homo_sapiens
NC_000001.11	31432177	31432190	RefSeqFE_nucleotide_motif_GeneID:110594336	gene-overlapping,intronic	protein_coding_GeneID:347735_SERINC2	ENCODEcCRE,Ensembl104,dbSUPER	NG_055425.1	Homo_sapiens
NC_000001.11	31432204	31432217	RefSeqFE_nucleotide_motif_GeneID:110594336	gene-overlapping,intronic	protein_coding_GeneID:347735_SERINC2	ENCODEcCRE,Ensembl104,dbSUPER	NG_055425.1	Homo_sapiens
NC_000001.11	31715167	31715462	RefSeqFE_enhancer_GeneID:112577582	intergenic_gene_5prime-distal	.	ENCODEcCRE,Ensembl104,FANTOM5,dbSUPER	NG_060498.1	Homo_sapiens
NC_000001.11	31955825	31956433	RefSeqFE_enhancer_GeneID:108254669	intergenic_gene_5prime-distal	.	ENCODEcCRE,Ensembl104,dbSUPER	NG_051015.1	Homo_sapiens
NC_000001.11	31956020	31956495	RefSeqFE_CAGE_cluster_GeneID:108254669	intergenic_gene_5prime-distal	.	ENCODEcCRE,Ensembl104,dbSUPER	NG_051015.1	Homo_sapiens
NC_000001.11	32044428	32045312	RefSeqFE_enhancer_GeneID:110120729	gene-overlapping,intronic	protein_coding_GeneID:10657_KHDRBS1	Ensembl104,VISTA	NG_053354.1	Homo_sapiens
NC_000001.11	32062467	32062762	RefSeqFE_enhancer_GeneID:112577583	intergenic_gene_5prime-distal	.	ENCODEcCRE	NG_060499.1	Homo_sapiens
NC_000001.11	32725227	32725522	RefSeqFE_enhancer_GeneID:112577584	intergenic_gene_5prime-distal	.	ENCODEcCRE,Ensembl104,dbSUPER	NG_060500.1	Homo_sapiens
NC_000001.11	33363187	33365346	RefSeqFE_enhancer_GeneID:110121088	gene-overlapping,intronic	protein_coding_GeneID:1912_PHC2	ENCODEcCRE,Ensembl104,FANTOM5,VISTA,dbSUPER	NG_053708.1	Homo_sapiens
NC_000001.11	35715507	35715802	RefSeqFE_enhancer_GeneID:112577585	CDS-overlapping,exon-overlapping,gene-overlapping	protein_coding_GeneID:127703_C1orf216	ENCODEcCRE,Ensembl104	NG_060501.1	Homo_sapiens
NC_000001.11	36248327	36248622	RefSeqFE_enhancer_GeneID:111828505	gene-overlapping,intronic	protein_coding_GeneID:9967_THRAP3	ENCODEcCRE,Ensembl104,dbSUPER	NG_056233.1	Homo_sapiens
NC_000001.11	36248387	36248682	RefSeqFE_enhancer_GeneID:111828505	gene-overlapping,intronic	protein_coding_GeneID:9967_THRAP3	ENCODEcCRE,Ensembl104,dbSUPER	NG_056233.1	Homo_sapiens
NC_000001.11	36269407	36269702	RefSeqFE_enhancer_GeneID:112577586	gene-overlapping,intronic	protein_coding_GeneID:9967_THRAP3	ENCODEcCRE,Ensembl104,dbSUPER	NG_060502.1	Homo_sapiens
NC_000001.11	36373807	36374102	RefSeqFE_enhancer_GeneID:112577587	gene-overlapping,intronic	protein_coding_GeneID:83931_STK40	ENCODEcCRE,Ensembl104,FANTOM5,dbSUPER	NG_060503.1	Homo_sapiens
NC_000001.11	36446367	36446662	RefSeqFE_enhancer_GeneID:112577588	gene-overlapping,intronic	lncRNA_GeneID:107984940_LOC107984940,protein_coding_GeneID:127700_OSCP1	ENCODEcCRE,Ensembl104	NG_060504.1	Homo_sapiens
NC_000001.11	36743832	36743965	RefSeqFE_transcriptional_cis_regulatory_region_GeneID:115801424	intergenic_gene_5prime-distal	.	Ensembl104	NG_066082.1	Homo_sapiens
NC_000001.11	37479687	37479982	RefSeqFE_enhancer_GeneID:112577589	gene-overlapping,intronic	protein_coding_GeneID:80149_ZC3H12A	ENCODEcCRE,Ensembl104,dbSUPER	NG_060505.1	Homo_sapiens
NC_000001.11	37556727	37557022	RefSeqFE_enhancer_GeneID:112577590	UTR-overlapping,exon-overlapping,gene-overlapping	protein_coding_GeneID:7802_DNALI1	ENCODEcCRE,Ensembl104	NG_060506.1	Homo_sapiens
NC_000001.11	38031456	38031751	RefSeqFE_enhancer_GeneID:112577591	intergenic_gene_5prime-distal	.	ENCODEcCRE,dbSUPER	NG_060507.1	Homo_sapiens
NC_000001.11	38094521	38095934	RefSeqFE_enhancer_GeneID:110120621	gene-overlapping,intronic	lncRNA_GeneID:105378653_MIR3659HG	ENCODEcCRE,Ensembl104,VISTA,dbSUPER	NG_053248.1	Homo_sapiens
NC_000001.11	38246402	38247845	RefSeqFE_enhancer_GeneID:110120958	intergenic_gene_5prime-distal	.	ENCODEcCRE,Ensembl104,VISTA	NG_053579.1	Homo_sapiens
NC_000001.11	38262512	38266844	RefSeqFE_enhancer_GeneID:110121256	intergenic_gene_5prime-distal	.	ENCODEcCRE,Ensembl104,VISTA	NG_053871.1	Homo_sapiens
NC_000001.11	38370323	38372434	RefSeqFE_enhancer_GeneID:110121139	gene-overlapping,intronic	lncRNA_GeneID:105378657_LOC105378657	ENCODEcCRE,Ensembl104,VISTA	NG_053758.1	Homo_sapiens
NC_000001.11	38489836	38490131	RefSeqFE_enhancer_GeneID:112577594	gene-overlapping,intronic	lncRNA_GeneID:105378657_LOC105378657	ENCODEcCRE,Ensembl104	NG_060526.1	Homo_sapiens
NC_000001.11	38502836	38503131	RefSeqFE_enhancer_GeneID:112577595	gene-overlapping,intronic	lncRNA_GeneID:105378657_LOC105378657	ENCODEcCRE,Ensembl104	NG_060527.1	Homo_sapiens
NC_000001.11	38502836	38503131	RefSeqFE_silencer_GeneID:112577595	gene-overlapping,intronic	lncRNA_GeneID:105378657_LOC105378657	ENCODEcCRE,Ensembl104	NG_060527.1	Homo_sapiens
NC_000001.11	38527393	38527597	RefSeqFE_transcriptional_cis_regulatory_region_GeneID:115801425	gene-overlapping,intronic	lncRNA_GeneID:105378658_LOC105378658	ENCODEcCRE,Ensembl104	NG_066083.1	Homo_sapiens
NC_000001.11	38726936	38728462	RefSeqFE_enhancer_GeneID:110120969	gene-overlapping,intronic	lncRNA_GeneID:105378660_LOC105378660	ENCODEcCRE,Ensembl104,FANTOM5,VISTA	NG_053590.1	Homo_sapiens
NC_000001.11	38783084	38784457	RefSeqFE_enhancer_GeneID:110121002	intergenic_gene_5prime-distal	.	ENCODEcCRE,Ensembl104,VISTA	NG_053623.1	Homo_sapiens
NC_000001.11	38859696	38859991	RefSeqFE_enhancer_GeneID:112577596	UTR-overlapping,exon-overlapping,gene-overlapping	protein_coding_GeneID:64121_RRAGC	ENCODEcCRE,Ensembl104	NG_060528.1	Homo_sapiens
NC_000001.11	39387390	39387887	RefSeqFE_enhancer_GeneID:114803468	CDS-overlapping,exon-overlapping,gene-overlapping	protein_coding_GeneID:23499_MACF1[ClinVar_submission_gene,RSG_gene]	ENCODEcCRE,Ensembl104,dbSUPER	NG_064644.1	Homo_sapiens
NC_000001.11	39658076	39658371	RefSeqFE_enhancer_GeneID:112577597	UTR-overlapping,exon-overlapping,gene-overlapping	protein_coding_GeneID:84618_NT5C1A	ENCODEcCRE,Ensembl104	NG_060529.1	Homo_sapiens
NC_000001.11	39899016	39899311	RefSeqFE_enhancer_GeneID:112577598	UTR-overlapping,exon-overlapping,gene-overlapping	lncRNA_GeneID:105378668_MYCL-AS1,protein_coding_GeneID:4610_MYCL	ENCODEcCRE,Ensembl104,dbSUPER	NG_060530.1	Homo_sapiens
NC_000001.11	40531436	40531731	RefSeqFE_enhancer_GeneID:112577599	UTR-overlapping,exon-overlapping,gene-overlapping	protein_coding_GeneID:127396_ZNF684	ENCODEcCRE,Ensembl104	NG_060531.1	Homo_sapiens
NC_000001.11	40820969	40821114	RefSeqFE_enhancer_GeneID:111464991	gene-overlapping,intronic	protein_coding_GeneID:9132_KCNQ4[ClinVar_submission_gene,RSG_gene]	ENCODEcCRE,dbSUPER	NG_055907.1	Homo_sapiens
NC_000001.11	40821011	40821156	RefSeqFE_enhancer_GeneID:111464991	gene-overlapping,intronic	protein_coding_GeneID:9132_KCNQ4[ClinVar_submission_gene,RSG_gene]	ENCODEcCRE,dbSUPER	NG_055907.1	Homo_sapiens
NC_000001.11	40821032	40821050	RefSeqFE_transcriptional_cis_regulatory_region_GeneID:111464991	gene-overlapping,intronic	protein_coding_GeneID:9132_KCNQ4[ClinVar_submission_gene,RSG_gene]	ENCODEcCRE,dbSUPER	NG_055907.1	Homo_sapiens
NC_000001.11	40821074	40821092	RefSeqFE_transcriptional_cis_regulatory_region_GeneID:111464991	gene-overlapping,intronic	protein_coding_GeneID:9132_KCNQ4[ClinVar_submission_gene,RSG_gene]	ENCODEcCRE,dbSUPER	NG_055907.1	Homo_sapiens
NC_000001.11	41331256	41331551	RefSeqFE_enhancer_GeneID:112590790	intergenic_gene_5prime-distal	.	ENCODEcCRE,Ensembl104	NG_060573.1	Homo_sapiens
NC_000001.11	43476117	43476412	RefSeqFE_enhancer_GeneID:112590791	intergenic_gene_5prime-distal	.	ENCODEcCRE,Ensembl104,dbSUPER	NG_060574.1	Homo_sapiens
NC_000001.11	43929596	43929891	RefSeqFE_enhancer_GeneID:112590792	gene-overlapping,intronic	protein_coding_GeneID:6487_ST3GAL3[ClinVar_submission_gene,RSG_gene]	ENCODEcCRE,Ensembl104,dbSUPER	NG_060575.1	Homo_sapiens
NC_000001.11	43994836	43995131	RefSeqFE_enhancer_GeneID:112590793	gene-overlapping,intronic	protein_coding_GeneID:149473_CCDC24	ENCODEcCRE,Ensembl104,dbSUPER	NG_060576.1	Homo_sapiens
NC_000001.11	44034710	44037665	RefSeqFE_enhancer_GeneID:110121214	gene-overlapping,intronic	lncRNA_GeneID:107984948_LOC107984948	ENCODEcCRE,Ensembl104,VISTA,dbSUPER	NG_053830.1	Homo_sapiens
NC_000001.11	44036048	44036193	RefSeqFE_enhancer_GeneID:110121214	gene-overlapping,intronic	lncRNA_GeneID:107984948_LOC107984948	ENCODEcCRE,Ensembl104,VISTA,dbSUPER	NG_053830.1	Homo_sapiens
NC_000001.11	44036111	44036129	RefSeqFE_transcriptional_cis_regulatory_region_GeneID:110121214	gene-overlapping,intronic	lncRNA_GeneID:107984948_LOC107984948	ENCODEcCRE,Ensembl104,VISTA,dbSUPER	NG_053830.1	Homo_sapiens
NC_000001.11	44213276	44213571	RefSeqFE_enhancer_GeneID:112590794	UTR-overlapping,exon-overlapping,gene-overlapping	protein_coding_GeneID:55929_DMAP1	ENCODEcCRE,Ensembl104	NG_060577.1	Homo_sapiens
NC_000001.11	44249747	44250457	RefSeqFE_enhancer_GeneID:110120642	gene-overlapping,intronic	protein_coding_GeneID:79033_ERI3	ENCODEcCRE,Ensembl104,VISTA,dbSUPER	NG_053268.1	Homo_sapiens
NC_000001.11	44298096	44298391	RefSeqFE_enhancer_GeneID:112590795	gene-overlapping,intronic	protein_coding_GeneID:79033_ERI3	ENCODEcCRE	NG_060586.1	Homo_sapiens
NC_000001.11	44524151	44525477	RefSeqFE_enhancer_GeneID:110120644	gene-overlapping,intronic	protein_coding_GeneID:55182_RNF220	ENCODEcCRE,Ensembl104,VISTA,dbSUPER	NG_053270.1	Homo_sapiens
NC_000001.11	45134436	45134731	RefSeqFE_enhancer_GeneID:112590799	gene-overlapping,intronic	protein_coding_GeneID:57643_ZSWIM5	ENCODEcCRE,Ensembl104	NG_060589.1	Homo_sapiens
NC_000001.11	45491156	45491451	RefSeqFE_enhancer_GeneID:112590800	intergenic_gene_5prime-proximal	.	ENCODEcCRE,Ensembl104	NG_060590.1	Homo_sapiens
NC_000001.11	46522175	46523248	RefSeqFE_transcriptional_cis_regulatory_region_GeneID:115801426	intergenic_gene_5prime-distal	.	ENCODEcCRE,Ensembl104	NG_066084.1	Homo_sapiens
NC_000001.11	46536041	46536138	RefSeqFE_transcriptional_cis_regulatory_region_GeneID:115801427	intergenic_gene_5prime-proximal	.	.	NG_066085.1	Homo_sapiens
NC_000001.11	47181247	47181392	RefSeqFE_enhancer_GeneID:111429629	intergenic_gene_5prime-distal	.	ENCODEcCRE,dbSUPER	NG_055901.1	Homo_sapiens
NC_000001.11	47181310	47181328	RefSeqFE_transcriptional_cis_regulatory_region_GeneID:111429629	intergenic_gene_5prime-distal	.	ENCODEcCRE,dbSUPER	NG_055901.1	Homo_sapiens
NC_000001.11	50110962	50111143	RefSeqFE_enhancer_GeneID:107992392	gene-overlapping,intronic	protein_coding_GeneID:1996_ELAVL4	ENCODEcCRE,Ensembl104,dbSUPER	NG_050844.1	Homo_sapiens
NC_000001.11	50568873	50570617	RefSeqFE_enhancer_GeneID:110120607	gene-overlapping,intronic	protein_coding_GeneID:11124_FAF1	ENCODEcCRE,Ensembl104,VISTA	NG_053235.1	Homo_sapiens
NC_000001.11	50699522	50701114	RefSeqFE_enhancer_GeneID:110120609	gene-overlapping,intronic	protein_coding_GeneID:11124_FAF1	ENCODEcCRE,Ensembl104,VISTA,dbSUPER	NG_053237.1	Homo_sapiens
NC_000001.11	50873656	50873951	RefSeqFE_enhancer_GeneID:112590801	gene-overlapping,intronic	protein_coding_GeneID:11124_FAF1	ENCODEcCRE,Ensembl104	NG_060591.1	Homo_sapiens
NC_000001.11	50978762	50979272	RefSeqFE_transcriptional_cis_regulatory_region_GeneID:115801428	intergenic_gene_5prime-distal	.	ENCODEcCRE,Ensembl104,dbSUPER	NG_066086.1	Homo_sapiens
NC_000001.11	51878716	51879011	RefSeqFE_enhancer_GeneID:112590802	intergenic_gene_5prime-proximal	.	ENCODEcCRE,Ensembl104,dbSUPER	NG_060592.1	Homo_sapiens
NC_000001.11	52007236	52007531	RefSeqFE_enhancer_GeneID:112590803	intergenic_gene_5prime-distal	.	ENCODEcCRE	NG_060593.1	Homo_sapiens
NC_000001.11	52651996	52652291	RefSeqFE_enhancer_GeneID:112590804	gene-overlapping,intronic	protein_coding_GeneID:348378_SHISAL2A	ENCODEcCRE,Ensembl104,dbSUPER	NG_060594.1	Homo_sapiens
NC_000001.11	52651996	52652291	RefSeqFE_silencer_GeneID:112590804	gene-overlapping,intronic	protein_coding_GeneID:348378_SHISAL2A	ENCODEcCRE,Ensembl104,dbSUPER	NG_060594.1	Homo_sapiens
NC_000001.11	53120605	53125383	RefSeqFE_enhancer_GeneID:114827846	gene-overlapping,intronic	protein_coding_GeneID:6512_SLC1A7	ENCODEcCRE,Ensembl104,VISTA,dbSUPER	NG_065202.1	Homo_sapiens
NC_000001.11	53393376	53393671	RefSeqFE_enhancer_GeneID:112590805	intergenic_gene_5prime-distal	.	ENCODEcCRE,Ensembl104	NG_060595.1	Homo_sapiens
NC_000001.11	53889735	53890030	RefSeqFE_enhancer_GeneID:112590806	UTR-overlapping,exon-overlapping,gene-overlapping	protein_coding_GeneID:54432_YIPF1	ENCODEcCRE,Ensembl104	NG_060596.1	Homo_sapiens
NC_000001.11	53957235	53957530	RefSeqFE_enhancer_GeneID:112590807	gene-overlapping,intronic	protein_coding_GeneID:115353_LRRC42	ENCODEcCRE,Ensembl104	NG_060597.1	Homo_sapiens
NC_000001.11	54053235	54053530	RefSeqFE_enhancer_GeneID:112590808	UTR-overlapping,exon-overlapping,gene-overlapping	protein_coding_GeneID:9528_TMEM59[ClinVar_submission_gene]	ENCODEcCRE,Ensembl104	NG_060598.1	Homo_sapiens
NC_000001.11	54459372	54463153	RefSeqFE_enhancer_GeneID:110121126	intergenic_gene_5prime-distal	.	ENCODEcCRE,VISTA,dbSUPER	NG_053745.1	Homo_sapiens
NC_000001.11	55774430	55776762	RefSeqFE_enhancer_GeneID:110121161	intergenic_gene_5prime-distal	.	Ensembl104,VISTA	NG_053779.1	Homo_sapiens
NC_000001.11	56448936	56449231	RefSeqFE_enhancer_GeneID:112590809	intergenic_gene_5prime-distal	.	ENCODEcCRE,Ensembl104,FANTOM5	NG_060599.1	Homo_sapiens
NC_000001.11	56461396	56461691	RefSeqFE_enhancer_GeneID:112590810	intergenic_gene_5prime-distal	.	ENCODEcCRE,Ensembl104	NG_060600.1	Homo_sapiens
NC_000001.11	58883096	58883391	RefSeqFE_enhancer_GeneID:112590812	UTR-overlapping,exon-overlapping,gene-overlapping	lncRNA_GeneID:100131060_LINC01135,lncRNA_GeneID:105378753_LINC02777	ENCODEcCRE,dbSUPER	NG_060602.1	Homo_sapiens
NC_000001.11	59056652	59058420	RefSeqFE_enhancer_GeneID:110121125	gene-overlapping,intronic	lncRNA_GeneID:101926925_LINC01358	ENCODEcCRE,Ensembl104,FANTOM5,VISTA,dbSUPER	NG_053744.1	Homo_sapiens
NC_000001.11	59730916	59731211	RefSeqFE_enhancer_GeneID:112590814	gene-overlapping,intronic	protein_coding_GeneID:55277_FGGY[RSG_gene]	ENCODEcCRE,Ensembl104,FANTOM5,dbSUPER	NG_060604.1	Homo_sapiens
NC_000001.11	61141586	61141731	RefSeqFE_enhancer_GeneID:111501769	gene-overlapping,intronic	protein_coding_GeneID:4774_NFIA[ClinVar_submission_gene,RSG_gene]	ENCODEcCRE,Ensembl104,dbSUPER	NG_055936.1	Homo_sapiens
NC_000001.11	61141653	61141664	RefSeqFE_transcriptional_cis_regulatory_region_GeneID:111501769	gene-overlapping,intronic	protein_coding_GeneID:4774_NFIA[ClinVar_submission_gene,RSG_gene]	ENCODEcCRE,Ensembl104,dbSUPER	NG_055936.1	Homo_sapiens
NC_000001.11	61452122	61454518	RefSeqFE_enhancer_GeneID:110121050	gene-overlapping,intronic	protein_coding_GeneID:4774_NFIA[ClinVar_submission_gene,RSG_gene]	ENCODEcCRE,Ensembl104,FANTOM5,VISTA,dbSUPER	NG_053670.1	Homo_sapiens
NC_000001.11	61579787	61582487	RefSeqFE_enhancer_GeneID:110121124	intergenic_gene_5prime-distal	.	Ensembl104,VISTA	NG_053743.1	Homo_sapiens
NC_000001.11	61587760	61590236	RefSeqFE_enhancer_GeneID:110121108	intergenic_gene_5prime-distal	.	ENCODEcCRE,Ensembl104,VISTA	NG_053727.1	Homo_sapiens
NC_000001.11	62903677	62905223	RefSeqFE_enhancer_GeneID:110120659	intergenic_gene_5prime-distal	.	VISTA	NG_053285.1	Homo_sapiens
NC_000001.11	62977862	62979213	RefSeqFE_enhancer_GeneID:110120599	intergenic_gene_5prime-distal	.	ENCODEcCRE,Ensembl104,VISTA	NG_053227.1	Homo_sapiens
NC_000001.11	62998610	63000046	RefSeqFE_enhancer_GeneID:110120600	intergenic_gene_5prime-distal	.	VISTA	NG_053228.1	Homo_sapiens
NC_000001.11	63199547	63200451	RefSeqFE_enhancer_GeneID:110120763	gene-overlapping,intronic	lncRNA_GeneID:199899_LINC00466	ENCODEcCRE,Ensembl104,VISTA	NG_053388.1	Homo_sapiens
NC_000001.11	64006716	64007011	RefSeqFE_enhancer_GeneID:112590815	gene-overlapping,intronic	protein_coding_GeneID:4919_ROR1[ClinVar_submission_gene,RSG_gene]	ENCODEcCRE,Ensembl104,dbSUPER	NG_060605.1	Homo_sapiens
NC_000001.11	64915905	64916200	RefSeqFE_enhancer_GeneID:112590816	gene-overlapping,intronic	protein_coding_GeneID:3716_JAK1[ClinVar_submission_gene,LRG_gene,RSG_gene]	ENCODEcCRE,FANTOM5,dbSUPER	NG_060606.1	Homo_sapiens
NC_000001.11	64934305	64934600	RefSeqFE_enhancer_GeneID:112590817	gene-overlapping,intronic	protein_coding_GeneID:3716_JAK1[ClinVar_submission_gene,LRG_gene,RSG_gene]	ENCODEcCRE,Ensembl104,FANTOM5,dbSUPER	NG_060607.1	Homo_sapiens
NC_000001.11	65412545	65412840	RefSeqFE_enhancer_GeneID:112590818	gene-overlapping,intronic	protein_coding_GeneID:9829_DNAJC6[ClinVar_submission_gene,RSG_gene]	ENCODEcCRE,Ensembl104,dbSUPER	NG_060608.1	Homo_sapiens
NC_000001.11	67682609	67683102	RefSeqFE_transcriptional_cis_regulatory_region_GeneID:115801429	intergenic_gene_5prime-distal	.	ENCODEcCRE,Ensembl104,dbSUPER	NG_066087.1	Homo_sapiens
NC_000001.11	70156605	70156900	RefSeqFE_enhancer_GeneID:112590819	gene-overlapping,intronic	protein_coding_GeneID:55631_LRRC40	Ensembl104	NG_060609.1	Homo_sapiens
NC_000001.11	70674897	70676314	RefSeqFE_transcriptional_cis_regulatory_region_GeneID:115801430	intergenic_gene_5prime-distal	.	ENCODEcCRE,Ensembl104	NG_066088.1	Homo_sapiens
NC_000001.11	75092044	75092339	RefSeqFE_enhancer_GeneID:112590820	intergenic_gene_5prime-distal	.	ENCODEcCRE,Ensembl104	NG_060610.1	Homo_sapiens
NC_000001.11	79075661	79083449	RefSeqFE_enhancer_GeneID:110121238	intergenic_gene_5prime-distal	.	ENCODEcCRE,Ensembl104,VISTA	NG_053853.1	Homo_sapiens
NC_000001.11	82879682	82880588	RefSeqFE_enhancer_GeneID:110120683	gene-overlapping,intronic	lncRNA_GeneID:107985396_LOC107985396	ENCODEcCRE,Ensembl104,VISTA	NG_053309.1	Homo_sapiens
NC_000001.11	87329508	87331054	RefSeqFE_enhancer_GeneID:110120776	gene-overlapping,intronic	protein_coding_GeneID:8543_LMO4	ENCODEcCRE,Ensembl104,VISTA,dbSUPER	NG_053401.1	Homo_sapiens
NC_000001.11	87355937	87357399	RefSeqFE_enhancer_GeneID:110120602	gene-overlapping,intronic	lncRNA_GeneID:100505768_LINC01364	ENCODEcCRE,VISTA	NG_053230.1	Homo_sapiens
NC_000001.11	87356109	87357227	RefSeqFE_enhancer_GeneID:110120602	gene-overlapping,intronic	lncRNA_GeneID:100505768_LINC01364	ENCODEcCRE,VISTA	NG_053230.1	Homo_sapiens
NC_000001.11	87560179	87561520	RefSeqFE_enhancer_GeneID:110121010	intergenic_gene_5prime-distal	.	ENCODEcCRE,Ensembl104,VISTA	NG_053631.1	Homo_sapiens
NC_000001.11	87599357	87600847	RefSeqFE_enhancer_GeneID:110121031	intergenic_gene_5prime-distal	.	ENCODEcCRE,Ensembl104,VISTA	NG_053652.1	Homo_sapiens
NC_000001.11	87642400	87643713	RefSeqFE_enhancer_GeneID:110120959	intergenic_gene_5prime-distal	.	ENCODEcCRE,VISTA	NG_053580.1	Homo_sapiens
NC_000001.11	88070035	88072707	RefSeqFE_enhancer_GeneID:110121023	intergenic_gene_5prime-distal	.	ENCODEcCRE,VISTA	NG_053644.1	Homo_sapiens
NC_000001.11	88150003	88151244	RefSeqFE_enhancer_GeneID:110120795	intergenic_gene_5prime-distal	.	ENCODEcCRE,Ensembl104,VISTA	NG_053420.1	Homo_sapiens
NC_000001.11	88220392	88222057	RefSeqFE_enhancer_GeneID:110120990	intergenic_gene_5prime-distal	.	ENCODEcCRE,Ensembl104,VISTA	NG_053611.1	Homo_sapiens
NC_000001.11	88461112	88462825	RefSeqFE_enhancer_GeneID:110120664	intergenic_gene_5prime-distal	.	ENCODEcCRE,Ensembl104,VISTA	NG_053290.1	Homo_sapiens
NC_000001.11	88647305	88647600	RefSeqFE_enhancer_GeneID:112590824	gene-overlapping,intronic	lncRNA_GeneID:101927891_PKN2-AS1,lncRNA_GeneID:105378838_LOC105378838	Ensembl104,FANTOM5	NG_060614.1	Homo_sapiens
NC_000001.11	89622929	89623224	RefSeqFE_silencer_GeneID:113939989	gene-overlapping,intronic	protein_coding_GeneID:84230_LRRC8C	ENCODEcCRE,Ensembl104,dbSUPER	NG_063768.1	Homo_sapiens
NC_000001.11	90840004	90841658	RefSeqFE_enhancer_GeneID:110120716	gene-overlapping,intronic	lncRNA_GeneID:105378853_LINC02609	ENCODEcCRE,Ensembl104,VISTA	NG_053341.1	Homo_sapiens
NC_000001.11	91732531	91732826	RefSeqFE_enhancer_GeneID:112590826	gene-overlapping,intronic	protein_coding_GeneID:7049_TGFBR3[ClinVar_submission_gene,RSG_gene]	ENCODEcCRE,Ensembl104,FANTOM5,dbSUPER	NG_060616.1	Homo_sapiens
NC_000001.11	93079031	93079326	RefSeqFE_enhancer_GeneID:112590827	UTR-overlapping,exon-overlapping,gene-overlapping	protein_coding_GeneID:22823_MTF2	ENCODEcCRE,Ensembl104	NG_060617.1	Homo_sapiens
NC_000001.11	93979952	93980247	RefSeqFE_enhancer_GeneID:112590828	intergenic_gene_5prime-distal	.	ENCODEcCRE,Ensembl104,dbSUPER	NG_060618.1	Homo_sapiens
NC_000001.11	95084408	95085129	RefSeqFE_transcriptional_cis_regulatory_region_GeneID:115801431	intergenic_gene_5prime-distal	.	ENCODEcCRE,Ensembl104,VISTA,dbSUPER	NG_066089.1	Homo_sapiens
NC_000001.11	95085195	95085844	RefSeqFE_transcriptional_cis_regulatory_region_GeneID:115801432	intergenic_gene_5prime-distal	.	ENCODEcCRE,Ensembl104,VISTA,dbSUPER	NG_066090.1	Homo_sapiens
NC_000001.11	95087021	95087486	RefSeqFE_transcriptional_cis_regulatory_region_GeneID:115801433	intergenic_gene_5prime-distal	.	ENCODEcCRE,Ensembl104,dbSUPER	NG_066091.1	Homo_sapiens
NC_000001.11	95111052	95111329	RefSeqFE_transcriptional_cis_regulatory_region_GeneID:115801434	gene-overlapping,intronic	protein_coding_GeneID:148534_TLCD4	ENCODEcCRE,Ensembl104	NG_066092.1	Homo_sapiens
NC_000001.11	95113738	95113968	RefSeqFE_transcriptional_cis_regulatory_region_GeneID:115801435	gene-overlapping,intronic	protein_coding_GeneID:148534_TLCD4	.	NG_066093.1	Homo_sapiens
NC_000001.11	95115579	95116107	RefSeqFE_transcriptional_cis_regulatory_region_GeneID:115801436	gene-overlapping,intronic	protein_coding_GeneID:148534_TLCD4	ENCODEcCRE,Ensembl104	NG_066094.1	Homo_sapiens
NC_000001.11	97144934	97146185	RefSeqFE_enhancer_GeneID:110120739	gene-overlapping,intronic	lncRNA_GeneID:100873932_DPYD-AS1[ClinVar_submission_gene,LRG_gene,RSG_gene],protein_coding_GeneID:1806_DPYD[ClinVar_submission_gene,LRG_gene,RSG_gene]	ENCODEcCRE,Ensembl104,VISTA	NG_053364.1	Homo_sapiens
NC_000001.11	100583072	100583217	RefSeqFE_enhancer_GeneID:111556158	intergenic_gene_5prime-distal	.	ENCODEcCRE,Ensembl104	NG_055980.1	Homo_sapiens
NC_000001.11	100583138	100583152	RefSeqFE_transcriptional_cis_regulatory_region_GeneID:111556158	intergenic_gene_5prime-distal	.	ENCODEcCRE,Ensembl104	NG_055980.1	Homo_sapiens
NC_000001.11	101922188	101924716	RefSeqFE_meiotic_recombination_region_GeneID:107457601	gene-overlapping,intronic	protein_coding_GeneID:118427_OLFM3	.	NG_046840.1	Homo_sapiens
NC_000001.11	101923403	101925357	RefSeqFE_meiotic_recombination_region_GeneID:107457601	gene-overlapping,intronic	protein_coding_GeneID:118427_OLFM3	.	NG_046840.1	Homo_sapiens
NC_000001.11	101923583	101924883	RefSeqFE_meiotic_recombination_region_GeneID:107457601	gene-overlapping,intronic	protein_coding_GeneID:118427_OLFM3	.	NG_046840.1	Homo_sapiens
NC_000001.11	101924249	101924265	RefSeqFE_nucleotide_motif_GeneID:107457601	gene-overlapping,intronic	protein_coding_GeneID:118427_OLFM3	.	NG_046840.1	Homo_sapiens
NC_000001.11	101924646	101924659	RefSeqFE_nucleotide_motif_GeneID:107457601	gene-overlapping,intronic	protein_coding_GeneID:118427_OLFM3	.	NG_046840.1	Homo_sapiens
NC_000001.11	108200266	108200561	RefSeqFE_enhancer_GeneID:112577470	UTR-overlapping,exon-overlapping,gene-overlapping	protein_coding_GeneID:29957_SLC25A24[ClinVar_submission_gene,RSG_gene]	ENCODEcCRE,Ensembl104,dbSUPER	NG_060034.1	Homo_sapiens
NC_000001.11	108533624	108534200	RefSeqFE_transcriptional_cis_regulatory_region_GeneID:115801437	intergenic_gene_5prime-distal	.	ENCODEcCRE,Ensembl104	NG_066095.1	Homo_sapiens
NC_000001.11	109253073	109256228	RefSeqFE_enhancer_GeneID:110121283	CDS-overlapping,exon-overlapping,gene-overlapping	protein_coding_GeneID:1952_CELSR2[ClinVar_submission_gene,RSG_gene]	ENCODEcCRE,Ensembl104,FANTOM5,VISTA,dbSUPER	NG_053898.1	Homo_sapiens
NC_000001.11	109274251	109276283	RefSeqFE_enhancer_GeneID:110121285	UTR-overlapping,exon-overlapping,gene-overlapping	protein_coding_GeneID:1952_CELSR2[ClinVar_submission_gene,RSG_gene]	ENCODEcCRE,VISTA,dbSUPER	NG_053900.1	Homo_sapiens
NC_000001.11	109277466	109277761	RefSeqFE_enhancer_GeneID:112577471	intergenic_gene_5prime-distal	.	ENCODEcCRE,Ensembl104,dbSUPER	NG_060035.1	Homo_sapiens
NC_000001.11	109772106	109772401	RefSeqFE_enhancer_GeneID:112577473	intergenic_gene_5prime-distal	.	ENCODEcCRE,Ensembl104,dbSUPER	NG_060037.1	Homo_sapiens
NC_000001.11	109889136	109889561	RefSeqFE_transcriptional_cis_regulatory_region_GeneID:115801438	gene-overlapping,intronic	lncRNA_GeneID:107985167_LINC01768	dbSUPER	NG_066096.1	Homo_sapiens
NC_000001.11	110341286	110341581	RefSeqFE_enhancer_GeneID:112577475	CDS-overlapping,exon-overlapping,gene-overlapping	protein_coding_GeneID:64783_RBM15	ENCODEcCRE,Ensembl104,dbSUPER	NG_060038.1	Homo_sapiens
NC_000001.11	111619526	111619821	RefSeqFE_enhancer_GeneID:112577476	UTR-overlapping,exon-overlapping,gene-overlapping	lncRNA_GeneID:107985184_LOC107985184,protein_coding_GeneID:5906_RAP1A	ENCODEcCRE,Ensembl104,dbSUPER	NG_060039.1	Homo_sapiens
NC_000001.11	112698986	112699281	RefSeqFE_enhancer_GeneID:112577477	CDS-overlapping,exon-overlapping,gene-overlapping	protein_coding_GeneID:4343_MOV10	ENCODEcCRE,dbSUPER	NG_060040.1	Homo_sapiens
NC_000001.11	112904066	112904361	RefSeqFE_enhancer_GeneID:112577478	intergenic_gene_5prime-distal	.	ENCODEcCRE,Ensembl104	NG_060041.1	Homo_sapiens
NC_000001.11	112997433	112999398	RefSeqFE_enhancer_GeneID:110121184	intergenic_gene_5prime-distal	.	ENCODEcCRE,Ensembl104,VISTA	NG_053802.1	Homo_sapiens
NC_000001.11	113027586	113027881	RefSeqFE_silencer_GeneID:113939977	gene-overlapping,intronic	lncRNA_GeneID:100996251_LRIG2-DT	ENCODEcCRE,Ensembl104	NG_063758.1	Homo_sapiens
NC_000001.11	113140525	113141426	RefSeqFE_transcriptional_cis_regulatory_region_GeneID:115801439	intergenic_gene_5prime-distal	.	ENCODEcCRE,Ensembl104	NG_066097.1	Homo_sapiens
NC_000001.11	113914325	113914470	RefSeqFE_enhancer_GeneID:111413047	intergenic_gene_5prime-distal	.	ENCODEcCRE,Ensembl104	NG_055877.1	Homo_sapiens
NC_000001.11	113914389	113914407	RefSeqFE_transcriptional_cis_regulatory_region_GeneID:111413047	intergenic_gene_5prime-distal	.	ENCODEcCRE,Ensembl104	NG_055877.1	Homo_sapiens
NC_000001.11	114458306	114458601	RefSeqFE_enhancer_GeneID:112577479	gene-overlapping,intronic	protein_coding_GeneID:51592_TRIM33[RSG_gene]	ENCODEcCRE,Ensembl104,FANTOM5,dbSUPER	NG_060042.1	Homo_sapiens
NC_000001.11	115595867	115596162	RefSeqFE_enhancer_GeneID:112577480	intergenic_gene_5prime-distal	.	ENCODEcCRE,Ensembl104	NG_060043.1	Homo_sapiens
NC_000001.11	116418446	116418741	RefSeqFE_enhancer_GeneID:112577481	UTR-overlapping,exon-overlapping,gene-overlapping	lncRNA_GeneID:84852_ATP1A1-AS1	ENCODEcCRE,Ensembl104,dbSUPER	NG_060044.1	Homo_sapiens
NC_000001.11	116475259	116475404	RefSeqFE_enhancer_GeneID:111365211	gene-overlapping,intronic	lncRNA_GeneID:101929023_LINC01762	ENCODEcCRE,Ensembl104,FANTOM5,dbSUPER	NG_055825.1	Homo_sapiens
NC_000001.11	116475324	116475338	RefSeqFE_transcriptional_cis_regulatory_region_GeneID:111365211	gene-overlapping,intronic	lncRNA_GeneID:101929023_LINC01762	ENCODEcCRE,Ensembl104,FANTOM5,dbSUPER	NG_055825.1	Homo_sapiens
NC_000001.11	116503159	116503212	RefSeqFE_transcriptional_cis_regulatory_region_GeneID:115801440	UTR-overlapping,exon-overlapping,gene-overlapping	protein_coding_GeneID:965_CD58	ENCODEcCRE,dbSUPER	NG_066098.1	Homo_sapiens
NC_000001.11	116503940	116504922	RefSeqFE_transcriptional_cis_regulatory_region_GeneID:112577483	UTR-overlapping,exon-overlapping,gene-overlapping	protein_coding_GeneID:965_CD58	ENCODEcCRE,Ensembl104,FANTOM5,dbSUPER	NG_060045.2	Homo_sapiens
NC_000001.11	116504426	116504721	RefSeqFE_enhancer_GeneID:112577483	UTR-overlapping,exon-overlapping,gene-overlapping	protein_coding_GeneID:965_CD58	ENCODEcCRE,Ensembl104,FANTOM5,dbSUPER	NG_060045.2	Homo_sapiens
NC_000001.11	116687161	116688033	RefSeqFE_transcriptional_cis_regulatory_region_GeneID:115801441	intergenic_gene_5prime-distal	.	ENCODEcCRE,Ensembl104,dbSUPER	NG_066099.1	Homo_sapiens
NC_000001.11	116751949	116754547	RefSeqFE_promoter_GeneID:107161156	intergenic_gene_5prime-proximal	.	ENCODEcCRE,Ensembl104,dbSUPER	NG_046701.1	Homo_sapiens
NC_000001.11	116752179	116752679	RefSeqFE_transcriptional_cis_regulatory_region_GeneID:107161156	intergenic_gene_5prime-proximal	.	dbSUPER	NG_046701.1	Homo_sapiens
NC_000001.11	116752179	116753183	RefSeqFE_DNAseI_hypersensitive_site_GeneID:107161156	intergenic_gene_5prime-proximal	.	Ensembl104,dbSUPER	NG_046701.1	Homo_sapiens
NC_000001.11	116752679	116753183	RefSeqFE_silencer_GeneID:107161156	intergenic_gene_5prime-proximal	.	Ensembl104,dbSUPER	NG_046701.1	Homo_sapiens
NC_000001.11	116753016	116753046	RefSeqFE_transcriptional_cis_regulatory_region_GeneID:107161156	intergenic_gene_5prime-proximal	.	Ensembl104,dbSUPER	NG_046701.1	Homo_sapiens
NC_000001.11	116754104	116754547	RefSeqFE_promoter_GeneID:107161156	CDS-overlapping,exon-overlapping,gene-overlapping	protein_coding_GeneID:914_CD2[RSG_gene]	ENCODEcCRE,Ensembl104,dbSUPER	NG_046701.1	Homo_sapiens
NC_000001.11	116754124	116754524	RefSeqFE_DNAseI_hypersensitive_site_GeneID:107161156	UTR-overlapping,exon-overlapping,gene-overlapping	protein_coding_GeneID:914_CD2[RSG_gene]	ENCODEcCRE,Ensembl104,dbSUPER	NG_046701.1	Homo_sapiens
NC_000001.11	116754383	116754413	RefSeqFE_protein_binding_site_upstream_transcription_factor_protein(s)_GeneID:107161156	intergenic_gene_5prime-proximal	.	ENCODEcCRE,Ensembl104,dbSUPER	NG_046701.1	Homo_sapiens
NC_000001.11	116769216	116770316	RefSeqFE_enhancer_GeneID:107126361	intergenic_gene_5prime-distal	.	ENCODEcCRE,dbSUPER	NG_046633.1	Homo_sapiens
NC_000001.11	116769216	116770516	RefSeqFE_enhancer_GeneID:107126361	intergenic_gene_5prime-distal	.	ENCODEcCRE,dbSUPER	NG_046633.1	Homo_sapiens
NC_000001.11	116769216	116770716	RefSeqFE_enhancer_GeneID:107126361	intergenic_gene_5prime-distal	.	ENCODEcCRE,dbSUPER	NG_046633.1	Homo_sapiens
NC_000001.11	116769216	116771338	RefSeqFE_locus_control_region_GeneID:107126361	intergenic_gene_5prime-distal	.	ENCODEcCRE,dbSUPER	NG_046633.1	Homo_sapiens
NC_000001.11	116769253	116774826	RefSeqFE_locus_control_region_GeneID:107126361	intergenic_gene_5prime-distal	.	ENCODEcCRE,dbSUPER	NG_046633.1	Homo_sapiens
NC_000001.11	116769616	116770216	RefSeqFE_DNAseI_hypersensitive_site_GeneID:107126361	intergenic_gene_5prime-distal	.	ENCODEcCRE,dbSUPER	NG_046633.1	Homo_sapiens
NC_000001.11	116769648	116770178	RefSeqFE_enhancer_GeneID:107126361	intergenic_gene_5prime-distal	.	ENCODEcCRE,dbSUPER	NG_046633.1	Homo_sapiens
NC_000001.11	116769663	116769684	RefSeqFE_transcriptional_cis_regulatory_region_GeneID:107126361	intergenic_gene_5prime-distal	.	ENCODEcCRE,dbSUPER	NG_046633.1	Homo_sapiens
NC_000001.11	116769751	116769775	RefSeqFE_protein_binding_site_SRY-box_4_GeneID:107126361	intergenic_gene_5prime-distal	.	ENCODEcCRE,dbSUPER	NG_046633.1	Homo_sapiens
NC_000001.11	116769751	116769775	RefSeqFE_transcriptional_cis_regulatory_region_GeneID:107126361	intergenic_gene_5prime-distal	.	ENCODEcCRE,dbSUPER	NG_046633.1	Homo_sapiens
NC_000001.11	116769849	116769872	RefSeqFE_transcriptional_cis_regulatory_region_GeneID:107126361	intergenic_gene_5prime-distal	.	ENCODEcCRE,dbSUPER	NG_046633.1	Homo_sapiens
NC_000001.11	116769946	116769978	RefSeqFE_protein_binding_site_E74-like_factor_1_(ets_domain_transcription_factor)_GeneID:107126361	intergenic_gene_5prime-distal	.	ENCODEcCRE,dbSUPER	NG_046633.1	Homo_sapiens
NC_000001.11	116769946	116769978	RefSeqFE_transcriptional_cis_regulatory_region_GeneID:107126361	intergenic_gene_5prime-distal	.	ENCODEcCRE,dbSUPER	NG_046633.1	Homo_sapiens
NC_000001.11	116770216	116770566	RefSeqFE_DNAseI_hypersensitive_site_GeneID:107126361	intergenic_gene_5prime-distal	.	ENCODEcCRE,dbSUPER	NG_046633.1	Homo_sapiens
NC_000001.11	116770616	116771016	RefSeqFE_DNAseI_hypersensitive_site_GeneID:107126361	intergenic_gene_5prime-distal	.	ENCODEcCRE,dbSUPER	NG_046633.1	Homo_sapiens
NC_000001.11	116770644	116770656	RefSeqFE_protein_binding_site_HMG-box_transcription_factor_1_GeneID:107126361	intergenic_gene_5prime-distal	.	dbSUPER	NG_046633.1	Homo_sapiens
NC_000001.11	116982286	116982581	RefSeqFE_enhancer_GeneID:112577484	gene-overlapping,intronic	protein_coding_GeneID:5738_PTGFRN	ENCODEcCRE,Ensembl104	NG_060046.1	Homo_sapiens
NC_000001.11	117929545	117929840	RefSeqFE_enhancer_GeneID:112577485	UTR-overlapping,exon-overlapping,gene-overlapping	protein_coding_GeneID:10885_WDR3,protein_coding_GeneID:54834_GDAP2	ENCODEcCRE,Ensembl104	NG_060047.1	Homo_sapiens
NC_000001.11	118485402	118487332	RefSeqFE_enhancer_GeneID:110121098	intergenic_gene_5prime-distal	.	ENCODEcCRE,Ensembl104,VISTA	NG_053717.1	Homo_sapiens
NC_000001.11	118906330	118906736	RefSeqFE_enhancer_GeneID:111721703	gene-overlapping,intronic	protein_coding_GeneID:6913_TBX15[RSG_gene]	ENCODEcCRE	NG_056146.1	Homo_sapiens
NC_000001.11	118928965	118929260	RefSeqFE_silencer_GeneID:113939978	gene-overlapping,intronic	protein_coding_GeneID:6913_TBX15[RSG_gene]	ENCODEcCRE,Ensembl104	NG_063759.1	Homo_sapiens
NC_000001.11	119414076	119415203	RefSeqFE_promoter_GeneID:109029530	UTR-overlapping,exon-overlapping,gene-overlapping	protein_coding_GeneID:3284_HSD3B2[ClinVar_submission_gene,RSG_gene]	.	NG_052011.1	Homo_sapiens
NC_000001.11	119414246	119414266	RefSeqFE_protein_binding_site_nuclear_receptor_subfamily_5_group_A_member_2_GeneID:109029530	intergenic_gene_5prime-proximal	.	.	NG_052011.1	Homo_sapiens
NC_000001.11	119414626	119415344	RefSeqFE_promoter_GeneID:109029530	UTR-overlapping,exon-overlapping,gene-overlapping	protein_coding_GeneID:3284_HSD3B2[ClinVar_submission_gene,RSG_gene]	.	NG_052011.1	Homo_sapiens
NC_000001.11	119414820	119414840	RefSeqFE_protein_binding_site_nuclear_receptor_subfamily_5_group_A_member_2_GeneID:109029530	intergenic_gene_5prime-proximal	.	.	NG_052011.1	Homo_sapiens
NC_000001.11	119414944	119414962	RefSeqFE_protein_binding_site_GATA_binding_protein_4_GeneID:109029530	UTR-overlapping,exon-overlapping,gene-overlapping	protein_coding_GeneID:3284_HSD3B2[ClinVar_submission_gene,RSG_gene]	.	NG_052011.1	Homo_sapiens
NC_000001.11	119415011	119415025	RefSeqFE_protein_binding_site_nuclear_receptor_subfamily_1_group_H_member_4_GeneID:109029530	UTR-overlapping,exon-overlapping,gene-overlapping	protein_coding_GeneID:3284_HSD3B2[ClinVar_submission_gene,RSG_gene]	.	NG_052011.1	Homo_sapiens
NC_000001.11	119415011	119415031	RefSeqFE_protein_binding_site_nuclear_receptor_subfamily_4_group_A_member_1_GeneID:109029530	UTR-overlapping,exon-overlapping,gene-overlapping	protein_coding_GeneID:3284_HSD3B2[ClinVar_submission_gene,RSG_gene]	.	NG_052011.1	Homo_sapiens
NC_000001.11	119415021	119415051	RefSeqFE_protein_binding_site_signal_transducer_and_activator_of_transcription_5_GeneID:109029530	UTR-overlapping,exon-overlapping,gene-overlapping	protein_coding_GeneID:3284_HSD3B2[ClinVar_submission_gene,RSG_gene]	.	NG_052011.1	Homo_sapiens
NC_000001.11	119415080	119415099	RefSeqFE_protein_binding_site_nuclear_receptor_subfamily_5_group_A_members_1_and_2_GeneID:109029530	UTR-overlapping,exon-overlapping,gene-overlapping	protein_coding_GeneID:3284_HSD3B2[ClinVar_submission_gene,RSG_gene]	.	NG_052011.1	Homo_sapiens
NC_000001.11	119415257	119415293	RefSeqFE_protein_binding_site_YY1_transcription_factor_GeneID:109029530	gene-overlapping,intronic	protein_coding_GeneID:3284_HSD3B2[ClinVar_submission_gene,RSG_gene]	.	NG_052011.1	Homo_sapiens
NC_000001.11	119415296	119415325	RefSeqFE_protein_binding_site_YY1_transcription_factor_GeneID:109029530	gene-overlapping,intronic	protein_coding_GeneID:3284_HSD3B2[ClinVar_submission_gene,RSG_gene]	.	NG_052011.1	Homo_sapiens
NC_000001.11	119504328	119507391	RefSeqFE_promoter_GeneID:109029529	intergenic_gene_5prime-proximal	.	ENCODEcCRE	NG_052010.1	Homo_sapiens
NC_000001.11	119504620	119504692	RefSeqFE_enhancer_GeneID:109029529	intergenic_gene_5prime-distal	.	ENCODEcCRE	NG_052010.1	Homo_sapiens
NC_000001.11	119504642	119504662	RefSeqFE_protein_binding_site_GATA_binding_protein_4_GeneID:109029529	intergenic_gene_5prime-distal	.	ENCODEcCRE	NG_052010.1	Homo_sapiens
NC_000001.11	119504642	119504662	RefSeqFE_protein_binding_site_TEA_domain_transcription_factor_3_GeneID:109029529	intergenic_gene_5prime-distal	.	ENCODEcCRE	NG_052010.1	Homo_sapiens
NC_000001.11	119506351	119506377	RefSeqFE_protein_binding_site_signal_transducer_and_activator_of_transcription_6_GeneID:109029529	intergenic_gene_5prime-proximal	.	.	NG_052010.1	Homo_sapiens
NC_000001.11	119506717	119507391	RefSeqFE_promoter_GeneID:109029529	gene-overlapping,intronic	protein_coding_GeneID:3283_HSD3B1[ClinVar_submission_gene,RSG_gene]	ENCODEcCRE	NG_052010.1	Homo_sapiens
NC_000001.11	119507042	119507068	RefSeqFE_protein_binding_site_signal_transducer_and_activator_of_transcription_6_GeneID:109029529	intergenic_gene_5prime-proximal	.	ENCODEcCRE	NG_052010.1	Homo_sapiens
NC_000001.11	119507072	119507093	RefSeqFE_protein_binding_site_nuclear_receptor_subfamily_4_group_A_members_1_and_2_GeneID:109029529	intergenic_gene_5prime-proximal	.	ENCODEcCRE	NG_052010.1	Homo_sapiens
NC_000001.11	119507313	119507337	RefSeqFE_enhancer_GeneID:109029529	gene-overlapping,intronic	protein_coding_GeneID:3283_HSD3B1[ClinVar_submission_gene,RSG_gene]	.	NG_052010.1	Homo_sapiens
NC_000001.11	119507313	119507337	RefSeqFE_protein_binding_site_Sp1_transcription_factor_GeneID:109029529	gene-overlapping,intronic	protein_coding_GeneID:3283_HSD3B1[ClinVar_submission_gene,RSG_gene]	.	NG_052010.1	Homo_sapiens
NC_000001.11	119507313	119507337	RefSeqFE_protein_binding_site_YY1_transcription_factor_GeneID:109029529	gene-overlapping,intronic	protein_coding_GeneID:3283_HSD3B1[ClinVar_submission_gene,RSG_gene]	.	NG_052010.1	Homo_sapiens
NC_000001.11	119507334	119507357	RefSeqFE_protein_binding_site_YY1_transcription_factor_GeneID:109029529	gene-overlapping,intronic	protein_coding_GeneID:3283_HSD3B1[ClinVar_submission_gene,RSG_gene]	.	NG_052010.1	Homo_sapiens
NC_000001.11	119948665	119948960	RefSeqFE_enhancer_GeneID:111776218	gene-overlapping,intronic	protein_coding_GeneID:4853_NOTCH2[ClinVar_submission_gene,RSG_gene]	ENCODEcCRE,Ensembl104,dbSUPER	NG_056187.1	Homo_sapiens
NC_000001.11	121184799	121185094	RefSeqFE_enhancer_GeneID:112577489	UTR-overlapping,exon-overlapping,gene-overlapping	protein_coding_GeneID:653464_SRGAP2C	ENCODEcCRE,Ensembl104	NG_060055.1	Homo_sapiens
NC_000001.11	144412674	144412969	RefSeqFE_silencer_GeneID:113939979	UTR-overlapping,exon-overlapping,gene-overlapping	lncRNA_GeneID:105373467_LOC105373467,snRNA_GeneID:101954267_RNVU1-15	ENCODEcCRE,Ensembl104	NG_063760.1	Homo_sapiens
NC_000001.11	145960449	145960568	RefSeqFE_enhancer_GeneID:106783502	CDS-overlapping,exon-overlapping,gene-overlapping	protein_coding_GeneID:284615_ANKRD34A[ClinVar_submission_gene],protein_coding_GeneID:84265_POLR3GL[ClinVar_submission_gene]	Ensembl104,dbSUPER	NG_046085.1	Homo_sapiens
NC_000001.11	145979292	145979934	RefSeqFE_enhancer_GeneID:108254679	intergenic_gene_5prime-distal	.	ENCODEcCRE,Ensembl104,FANTOM5,dbSUPER	NG_051026.1	Homo_sapiens
NC_000001.11	145979342	145979962	RefSeqFE_CAGE_cluster_GeneID:108254679	intergenic_gene_5prime-distal	.	ENCODEcCRE,Ensembl104,FANTOM5,dbSUPER	NG_051026.1	Homo_sapiens
NC_000001.11	147238168	147238313	RefSeqFE_enhancer_GeneID:111556113	gene-overlapping,intronic	protein_coding_GeneID:9557_CHD1L[ClinVar_submission_gene,RSG_gene]	ENCODEcCRE,Ensembl104	NG_055953.1	Homo_sapiens
NC_000001.11	147238234	147238248	RefSeqFE_transcriptional_cis_regulatory_region_GeneID:111556113	gene-overlapping,intronic	protein_coding_GeneID:9557_CHD1L[ClinVar_submission_gene,RSG_gene]	ENCODEcCRE,Ensembl104	NG_055953.1	Homo_sapiens
NC_000001.11	147748577	147753770	RefSeqFE_enhancer_GeneID:110121261	gene-overlapping,intronic	lncRNA_GeneID:102723321_LOC102723321	ENCODEcCRE,Ensembl104,VISTA,dbSUPER	NG_053876.1	Homo_sapiens
NC_000001.11	148264713	148265009	RefSeqFE_enhancer_GeneID:112577490	intergenic_gene_5prime-distal	.	ENCODEcCRE,Ensembl104	NG_060056.1	Homo_sapiens
NC_000001.11	150186817	150187104	RefSeqFE_transcriptional_cis_regulatory_region_GeneID:115801442	intergenic_gene_5prime-distal	.	ENCODEcCRE,Ensembl104,FANTOM5,dbSUPER	NG_066100.1	Homo_sapiens
NC_000001.11	150545400	150546120	RefSeqFE_transcriptional_cis_regulatory_region_GeneID:115801443	intergenic_gene_5prime-distal	.	ENCODEcCRE,Ensembl104,dbSUPER	NG_066101.1	Homo_sapiens
NC_000001.11	150579512	150579807	RefSeqFE_enhancer_GeneID:112577492	UTR-overlapping,exon-overlapping,gene-overlapping	protein_coding_GeneID:4170_MCL1[RSG_gene]	ENCODEcCRE,Ensembl104,dbSUPER	NG_060197.1	Homo_sapiens
NC_000001.11	150976844	150977758	RefSeqFE_transcriptional_cis_regulatory_region_GeneID:115801444	intergenic_gene_5prime-distal	.	ENCODEcCRE,Ensembl104,FANTOM5,dbSUPER	NG_066102.1	Homo_sapiens
NC_000001.11	151265532	151265827	RefSeqFE_enhancer_GeneID:112577493	CDS-overlapping,exon-overlapping,gene-overlapping	protein_coding_GeneID:5710_PSMD4[RSG_gene]	ENCODEcCRE,Ensembl104	NG_060198.1	Homo_sapiens
NC_000001.11	151265532	151265827	RefSeqFE_silencer_GeneID:112577493	CDS-overlapping,exon-overlapping,gene-overlapping	protein_coding_GeneID:5710_PSMD4[RSG_gene]	ENCODEcCRE,Ensembl104	NG_060198.1	Homo_sapiens
NC_000001.11	151311552	151311847	RefSeqFE_enhancer_GeneID:112577494	gene-overlapping,intronic	protein_coding_GeneID:5298_PI4KB	ENCODEcCRE,FANTOM5,dbSUPER	NG_060199.1	Homo_sapiens
NC_000001.11	151596241	151596992	RefSeqFE_transcriptional_cis_regulatory_region_GeneID:115801445	intergenic_gene_5prime-distal	.	ENCODEcCRE,Ensembl104	NG_066103.1	Homo_sapiens
NC_000001.11	152049545	152050038	RefSeqFE_CAGE_cluster_GeneID:108254671	UTR-overlapping,exon-overlapping,gene-overlapping	lncRNA_GeneID:101927949_LOC101927949	ENCODEcCRE,Ensembl104,FANTOM5,dbSUPER	NG_051017.1	Homo_sapiens
NC_000001.11	152049599	152050161	RefSeqFE_enhancer_GeneID:108254671	UTR-overlapping,exon-overlapping,gene-overlapping	lncRNA_GeneID:101927949_LOC101927949	ENCODEcCRE,Ensembl104,FANTOM5,dbSUPER	NG_051017.1	Homo_sapiens
NC_000001.11	152906046	152909786	RefSeqFE_promoter_GeneID:107880064	gene-overlapping,intronic	protein_coding_GeneID:3713_IVL[RSG_gene]	ENCODEcCRE,Ensembl104,FANTOM5	NG_047108.1	Homo_sapiens
NC_000001.11	152906071	152906457	RefSeqFE_enhancer_GeneID:107880064	intergenic_gene_5prime-distal	.	ENCODEcCRE,Ensembl104,FANTOM5	NG_047108.1	Homo_sapiens
NC_000001.11	152906071	152906595	RefSeqFE_enhancer_GeneID:107880064	intergenic_gene_5prime-distal	.	ENCODEcCRE,Ensembl104,FANTOM5	NG_047108.1	Homo_sapiens
NC_000001.11	152906071	152907313	RefSeqFE_enhancer_GeneID:107880064	intergenic_gene_5prime-proximal	.	ENCODEcCRE,Ensembl104,FANTOM5	NG_047108.1	Homo_sapiens
NC_000001.11	152906405	152906457	RefSeqFE_enhancer_GeneID:107880064	intergenic_gene_5prime-distal	.	ENCODEcCRE,Ensembl104,FANTOM5	NG_047108.1	Homo_sapiens
NC_000001.11	152906409	152906513	RefSeqFE_response_element_GeneID:107880064	intergenic_gene_5prime-distal	.	ENCODEcCRE,Ensembl104,FANTOM5	NG_047108.1	Homo_sapiens
NC_000001.11	152906410	152906450	RefSeqFE_protein_binding_site_JunB_proto-oncogene_AP-1_transcription_factor_subunit_GeneID:107880064	intergenic_gene_5prime-distal	.	ENCODEcCRE,Ensembl104,FANTOM5	NG_047108.1	Homo_sapiens
NC_000001.11	152906417	152906437	RefSeqFE_protein_binding_site_FOS_like_1_AP-1_trancription_factor_subunit_GeneID:107880064	intergenic_gene_5prime-distal	.	ENCODEcCRE,Ensembl104	NG_047108.1	Homo_sapiens
NC_000001.11	152906417	152906437	RefSeqFE_protein_binding_site_FOS_like_2_AP-1_trancription_factor_subunit_GeneID:107880064	intergenic_gene_5prime-distal	.	ENCODEcCRE,Ensembl104	NG_047108.1	Homo_sapiens
NC_000001.11	152906417	152906437	RefSeqFE_protein_binding_site_FosB_proto-oncogene_AP-1_trancription_factor_subunit_GeneID:107880064	intergenic_gene_5prime-distal	.	ENCODEcCRE,Ensembl104	NG_047108.1	Homo_sapiens
NC_000001.11	152906417	152906437	RefSeqFE_protein_binding_site_JunD_proto-oncogene_AP-1_transcription_factor_subunit_GeneID:107880064	intergenic_gene_5prime-distal	.	ENCODEcCRE,Ensembl104	NG_047108.1	Homo_sapiens
NC_000001.11	152906422	152906442	RefSeqFE_protein_binding_site_Sp1_transcription_factor_GeneID:107880064	intergenic_gene_5prime-distal	.	ENCODEcCRE,Ensembl104	NG_047108.1	Homo_sapiens
NC_000001.11	152906422	152906442	RefSeqFE_protein_binding_site_Sp3_transcription_factor_GeneID:107880064	intergenic_gene_5prime-distal	.	ENCODEcCRE,Ensembl104	NG_047108.1	Homo_sapiens
NC_000001.11	152906435	152906462	RefSeqFE_response_element_GeneID:107880064	intergenic_gene_5prime-distal	.	ENCODEcCRE,Ensembl104,FANTOM5	NG_047108.1	Homo_sapiens
NC_000001.11	152906745	152907228	RefSeqFE_enhancer_GeneID:107880064	intergenic_gene_5prime-proximal	.	Ensembl104	NG_047108.1	Homo_sapiens
NC_000001.11	152906852	152906877	RefSeqFE_protein_binding_site_transcription_factor_AP-2_gamma_GeneID:107880064	intergenic_gene_5prime-proximal	.	Ensembl104	NG_047108.1	Homo_sapiens
NC_000001.11	152907646	152908586	RefSeqFE_promoter_GeneID:107880064	intergenic_gene_5prime-proximal	.	ENCODEcCRE,Ensembl104	NG_047108.1	Homo_sapiens
NC_000001.11	152907663	152907673	RefSeqFE_protein_binding_site_signal_transducer_and_activator_of_transcription_1_GeneID:107880064	intergenic_gene_5prime-proximal	.	Ensembl104	NG_047108.1	Homo_sapiens
NC_000001.11	152907895	152908392	RefSeqFE_transcriptional_cis_regulatory_region_GeneID:107880064	intergenic_gene_5prime-proximal	.	ENCODEcCRE,Ensembl104	NG_047108.1	Homo_sapiens
NC_000001.11	152907996	152908013	RefSeqFE_protein_binding_site_TEA_domain_transcription_factor_1_GeneID:107880064	intergenic_gene_5prime-proximal	.	ENCODEcCRE,Ensembl104	NG_047108.1	Homo_sapiens
NC_000001.11	152908013	152908029	RefSeqFE_protein_binding_site_TEA_domain_transcription_factor_1_GeneID:107880064	intergenic_gene_5prime-proximal	.	ENCODEcCRE,Ensembl104	NG_047108.1	Homo_sapiens
NC_000001.11	152908068	152908092	RefSeqFE_protein_binding_site_PC4_and_SFRS1_interacting_protein_1_GeneID:107880064	intergenic_gene_5prime-proximal	.	Ensembl104	NG_047108.1	Homo_sapiens
NC_000001.11	152908116	152908136	RefSeqFE_protein_binding_site_TEA_domain_transcription_factor_1_GeneID:107880064	intergenic_gene_5prime-proximal	.	Ensembl104	NG_047108.1	Homo_sapiens
NC_000001.11	152908160	152908213	RefSeqFE_silencer_GeneID:107880064	intergenic_gene_5prime-proximal	.	Ensembl104	NG_047108.1	Homo_sapiens
NC_000001.11	152908173	152908213	RefSeqFE_protein_binding_site_POU_class_2_homeobox_2_GeneID:107880064	intergenic_gene_5prime-proximal	.	Ensembl104	NG_047108.1	Homo_sapiens
NC_000001.11	152908279	152908312	RefSeqFE_protein_binding_site_Jun_proto-oncogene_AP-1_transcription_factor_subunit_GeneID:107880064	intergenic_gene_5prime-proximal	.	ENCODEcCRE,Ensembl104	NG_047108.1	Homo_sapiens
NC_000001.11	152908305	152908540	RefSeqFE_promoter_GeneID:107880064	intergenic_gene_5prime-proximal	.	ENCODEcCRE,Ensembl104	NG_047108.1	Homo_sapiens
NC_000001.11	152908397	152908419	RefSeqFE_protein_binding_site_CCAAT/enhancer_binding_protein_alpha_GeneID:107880064	intergenic_gene_5prime-proximal	.	ENCODEcCRE,Ensembl104	NG_047108.1	Homo_sapiens
NC_000001.11	152908415	152908436	RefSeqFE_protein_binding_site_FOS_like_2_AP-1_trancription_factor_subunit_GeneID:107880064	intergenic_gene_5prime-proximal	.	ENCODEcCRE,Ensembl104	NG_047108.1	Homo_sapiens
NC_000001.11	152908415	152908436	RefSeqFE_protein_binding_site_JunB_proto-oncogene_AP-1_transcription_factor_subunit_GeneID:107880064	intergenic_gene_5prime-proximal	.	ENCODEcCRE,Ensembl104	NG_047108.1	Homo_sapiens
NC_000001.11	152908416	152908438	RefSeqFE_protein_binding_site_Fos_proto-oncogene_AP-1_trancription_factor_subunit_GeneID:107880064	intergenic_gene_5prime-proximal	.	ENCODEcCRE,Ensembl104	NG_047108.1	Homo_sapiens
NC_000001.11	152908416	152908438	RefSeqFE_protein_binding_site_Jun_proto-oncogene_AP-1_transcription_factor_subunit_GeneID:107880064	intergenic_gene_5prime-proximal	.	ENCODEcCRE,Ensembl104	NG_047108.1	Homo_sapiens
NC_000001.11	152908417	152908436	RefSeqFE_protein_binding_site_FOS_like_1_AP-1_trancription_factor_subunit_GeneID:107880064	intergenic_gene_5prime-proximal	.	ENCODEcCRE,Ensembl104	NG_047108.1	Homo_sapiens
NC_000001.11	152908417	152908436	RefSeqFE_protein_binding_site_FosB_proto-oncogene_AP-1_trancription_factor_subunit_GeneID:107880064	intergenic_gene_5prime-proximal	.	ENCODEcCRE,Ensembl104	NG_047108.1	Homo_sapiens
NC_000001.11	152908417	152908436	RefSeqFE_protein_binding_site_JunD_proto-oncogene_AP-1_transcription_factor_subunit_GeneID:107880064	intergenic_gene_5prime-proximal	.	ENCODEcCRE,Ensembl104	NG_047108.1	Homo_sapiens
NC_000001.11	152908585	152909786	RefSeqFE_silencer_GeneID:107880064	gene-overlapping,intronic	protein_coding_GeneID:3713_IVL[RSG_gene]	ENCODEcCRE,Ensembl104	NG_047108.1	Homo_sapiens
NC_000001.11	153434882	153435412	RefSeqFE_transcriptional_cis_regulatory_region_GeneID:115801446	intergenic_gene_5prime-distal	.	Ensembl104	NG_066104.1	Homo_sapiens
NC_000001.11	153532228	153532556	RefSeqFE_transcriptional_cis_regulatory_region_GeneID:115801447	intergenic_gene_5prime-distal	.	ENCODEcCRE,Ensembl104,FANTOM5,dbSUPER	NG_066105.1	Homo_sapiens
NC_000001.11	154860232	154860527	RefSeqFE_enhancer_GeneID:112577495	gene-overlapping,intronic	protein_coding_GeneID:3782_KCNN3[ClinVar_submission_gene,RSG_gene]	ENCODEcCRE,FANTOM5,dbSUPER	NG_060200.1	Homo_sapiens
NC_000001.11	155213011	155215463	RefSeqFE_non_allelic_homologous_recombination_region_GeneID:106627982	UTR-overlapping,exon-overlapping,gene-overlapping	protein_coding_GeneID:4580_MTX1,transcribed_pseudogene_GeneID:2630_GBAP1	Ensembl104,dbSUPER	NG_042868.1	Homo_sapiens
NC_000001.11	155216649	155216665	RefSeqFE_non_allelic_homologous_recombination_region_GeneID:106627982	gene-overlapping,intronic	transcribed_pseudogene_GeneID:2630_GBAP1	dbSUPER	NG_042868.1	Homo_sapiens
NC_000001.11	155217477	155217578	RefSeqFE_non_allelic_homologous_recombination_region_GeneID:106627982	UTR-overlapping,exon-overlapping,gene-overlapping	transcribed_pseudogene_GeneID:2630_GBAP1	dbSUPER	NG_042868.1	Homo_sapiens
NC_000001.11	155217882	155217908	RefSeqFE_non_allelic_homologous_recombination_region_GeneID:106627982	gene-overlapping,intronic	transcribed_pseudogene_GeneID:2630_GBAP1	dbSUPER	NG_042868.1	Homo_sapiens
NC_000001.11	155218147	155218165	RefSeqFE_non_allelic_homologous_recombination_region_GeneID:106627982	gene-overlapping,intronic	transcribed_pseudogene_GeneID:2630_GBAP1	dbSUPER	NG_042868.1	Homo_sapiens
NC_000001.11	155233638	155236144	RefSeqFE_non_allelic_homologous_recombination_region_GeneID:106627981	UTR-overlapping,exon-overlapping,gene-overlapping	protein_coding_GeneID:2629_GBA[ClinVar_submission_gene,RSG_gene],pseudogene_GeneID:4581_MTX1P1[ClinVar_submission_gene,RSG_gene]	Ensembl104,dbSUPER	NG_042867.1	Homo_sapiens
NC_000001.11	155237606	155237941	RefSeqFE_non_allelic_homologous_recombination_region_GeneID:106627981	gene-overlapping,intronic	protein_coding_GeneID:2629_GBA[ClinVar_submission_gene,RSG_gene]	ENCODEcCRE,Ensembl104,dbSUPER	NG_042867.1	Homo_sapiens
NC_000001.11	155238754	155238855	RefSeqFE_non_allelic_homologous_recombination_region_GeneID:106627981	gene-overlapping,intronic	protein_coding_GeneID:2629_GBA[ClinVar_submission_gene,RSG_gene]	ENCODEcCRE,dbSUPER	NG_042867.1	Homo_sapiens
NC_000001.11	155239804	155239830	RefSeqFE_non_allelic_homologous_recombination_region_GeneID:106627981	gene-overlapping,intronic	protein_coding_GeneID:2629_GBA[ClinVar_submission_gene,RSG_gene]	dbSUPER	NG_042867.1	Homo_sapiens
NC_000001.11	155240074	155240092	RefSeqFE_non_allelic_homologous_recombination_region_GeneID:106627981	CDS-overlapping,exon-overlapping,gene-overlapping	protein_coding_GeneID:2629_GBA[ClinVar_submission_gene,RSG_gene]	dbSUPER	NG_042867.1	Homo_sapiens
NC_000001.11	156102511	156107058	RefSeqFE_enhancer_GeneID:110121262	gene-overlapping,intronic	protein_coding_GeneID:4000_LMNA[ClinVar_submission_gene,LRG_gene,RSG_gene]	ENCODEcCRE,Ensembl104,FANTOM5,VISTA,dbSUPER	NG_053877.1	Homo_sapiens
NC_000001.11	156240843	156242193	RefSeqFE_promoter_GeneID:110013312	gene-overlapping,intronic	protein_coding_GeneID:100527963_PMF1-BGLAP	Ensembl104,dbSUPER	NG_053096.1	Homo_sapiens
NC_000001.11	156241547	156241577	RefSeqFE_transcriptional_cis_regulatory_region_GeneID:110013312	gene-overlapping,intronic	protein_coding_GeneID:100527963_PMF1-BGLAP	Ensembl104,dbSUPER	NG_053096.1	Homo_sapiens
NC_000001.11	156241615	156241776	RefSeqFE_enhancer_GeneID:110013312	gene-overlapping,intronic	protein_coding_GeneID:100527963_PMF1-BGLAP	Ensembl104,dbSUPER	NG_053096.1	Homo_sapiens
NC_000001.11	156241644	156241679	RefSeqFE_protein_binding_site_nuclear_factor_kappa_B_subunit_1_GeneID:110013312	gene-overlapping,intronic	protein_coding_GeneID:100527963_PMF1-BGLAP	Ensembl104,dbSUPER	NG_053096.1	Homo_sapiens
NC_000001.11	156241671	156241701	RefSeqFE_protein_binding_site_vitamin_D_(125-_dihydroxyvitamin_D3)_receptor_GeneID:110013312	gene-overlapping,intronic	protein_coding_GeneID:100527963_PMF1-BGLAP	Ensembl104,dbSUPER	NG_053096.1	Homo_sapiens
NC_000001.11	156241672	156241691	RefSeqFE_protein_binding_site_JunD_and_FOS_like_2_proto-oncogenes_AP-1_transcription_factor_subunits_GeneID:110013312	gene-overlapping,intronic	protein_coding_GeneID:100527963_PMF1-BGLAP	Ensembl104,dbSUPER	NG_053096.1	Homo_sapiens
NC_000001.11	156241673	156241695	RefSeqFE_protein_binding_site_Jun_and_Fos_proto-oncogenes_AP-1_transcription_factor_subunits_GeneID:110013312	gene-overlapping,intronic	protein_coding_GeneID:100527963_PMF1-BGLAP	Ensembl104,dbSUPER	NG_053096.1	Homo_sapiens
NC_000001.11	156241673	156241695	RefSeqFE_protein_binding_site_retinoic_acid_receptor_alpha_GeneID:110013312	gene-overlapping,intronic	protein_coding_GeneID:100527963_PMF1-BGLAP	Ensembl104,dbSUPER	NG_053096.1	Homo_sapiens
NC_000001.11	156241674	156241695	RefSeqFE_response_element_GeneID:110013312	gene-overlapping,intronic	protein_coding_GeneID:100527963_PMF1-BGLAP	Ensembl104,dbSUPER	NG_053096.1	Homo_sapiens
NC_000001.11	156241958	156242021	RefSeqFE_protein_binding_site_Jun_and_Fos_proto-oncogenes_AP-1_transcription_factor_subunits_GeneID:110013312	gene-overlapping,intronic	protein_coding_GeneID:100527963_PMF1-BGLAP	Ensembl104,dbSUPER	NG_053096.1	Homo_sapiens
NC_000001.11	156241960	156241966	RefSeqFE_protein_binding_site_transcriptional_repressor_GATA_binding_1_GeneID:110013312	gene-overlapping,intronic	protein_coding_GeneID:100527963_PMF1-BGLAP	Ensembl104,dbSUPER	NG_053096.1	Homo_sapiens
NC_000001.11	156241985	156242015	RefSeqFE_transcriptional_cis_regulatory_region_GeneID:110013312	gene-overlapping,intronic	protein_coding_GeneID:100527963_PMF1-BGLAP	Ensembl104,dbSUPER	NG_053096.1	Homo_sapiens
NC_000001.11	156241990	156242193	RefSeqFE_promoter_GeneID:110013312	gene-overlapping,intronic	protein_coding_GeneID:100527963_PMF1-BGLAP	Ensembl104,dbSUPER	NG_053096.1	Homo_sapiens
NC_000001.11	156242013	156242032	RefSeqFE_protein_binding_site_runt_related_transcription_factor_2_GeneID:110013312	gene-overlapping,intronic	protein_coding_GeneID:100527963_PMF1-BGLAP	Ensembl104,dbSUPER	NG_053096.1	Homo_sapiens
NC_000001.11	156242115	156242144	RefSeqFE_protein_binding_site_Sp1_Sp2_Sp3_transcription_factors_GeneID:110013312	gene-overlapping,intronic	protein_coding_GeneID:100527963_PMF1-BGLAP	Ensembl104,dbSUPER	NG_053096.1	Homo_sapiens
NC_000001.11	156242144	156242177	RefSeqFE_protein_binding_site_TATA-box_binding_protein_GeneID:110013312	gene-overlapping,intronic	protein_coding_GeneID:100527963_PMF1-BGLAP	Ensembl104,dbSUPER	NG_053096.1	Homo_sapiens
NC_000001.11	156242150	156242172	RefSeqFE_protein_binding_site_nuclear_receptor_subfamily_3_group_C_member_1_GeneID:110013312	gene-overlapping,intronic	protein_coding_GeneID:100527963_PMF1-BGLAP	Ensembl104,dbSUPER	NG_053096.1	Homo_sapiens
NC_000001.11	156242155	156242161	RefSeqFE_TATA_box_GeneID:110013312	gene-overlapping,intronic	protein_coding_GeneID:100527963_PMF1-BGLAP	Ensembl104,dbSUPER	NG_053096.1	Homo_sapiens
NC_000001.11	156242259	156242266	RefSeqFE_transcriptional_cis_regulatory_region_GeneID:110013312	CDS-overlapping,exon-overlapping,gene-overlapping	protein_coding_GeneID:100527963_PMF1-BGLAP[ClinVar_submission_gene,RSG_gene],protein_coding_GeneID:632_BGLAP[ClinVar_submission_gene,RSG_gene]	Ensembl104,dbSUPER	NG_053096.1	Homo_sapiens
NC_000001.11	156291397	156291692	RefSeqFE_enhancer_GeneID:111828496	CDS-overlapping,exon-overlapping,gene-overlapping	protein_coding_GeneID:23381_SMG5,protein_coding_GeneID:84283_TMEM79	ENCODEcCRE,Ensembl104,dbSUPER	NG_056230.1	Homo_sapiens
NC_000001.11	156291437	156291732	RefSeqFE_enhancer_GeneID:111828496	CDS-overlapping,exon-overlapping,gene-overlapping	protein_coding_GeneID:23381_SMG5,protein_coding_GeneID:84283_TMEM79	ENCODEcCRE,Ensembl104,dbSUPER	NG_056230.1	Homo_sapiens
NC_000001.11	156398462	156398757	RefSeqFE_transcriptional_cis_regulatory_region_GeneID:115801448	intergenic_gene_5prime-distal	.	ENCODEcCRE,Ensembl104,dbSUPER	NG_066106.1	Homo_sapiens
NC_000001.11	156660456	156665492	RefSeqFE_enhancer_GeneID:110121221	gene-overlapping,intronic	lncRNA_GeneID:105371453_BCAN-AS1	ENCODEcCRE,Ensembl104,FANTOM5,VISTA,dbSUPER	NG_053836.1	Homo_sapiens
NC_000001.11	157274685	157275184	RefSeqFE_transcriptional_cis_regulatory_region_GeneID:115801449	UTR-overlapping,exon-overlapping,gene-overlapping	lncRNA_GeneID:105371455_LINC02772,lncRNA_GeneID:105371456_LOC105371456	ENCODEcCRE,Ensembl104	NG_066107.1	Homo_sapiens
NC_000001.11	158019558	158019853	RefSeqFE_enhancer_GeneID:112577503	gene-overlapping,intronic	protein_coding_GeneID:55243_KIRREL1	ENCODEcCRE,Ensembl104,FANTOM5,dbSUPER	NG_060219.1	Homo_sapiens
NC_000001.11	158689135	158689433	RefSeqFE_transcriptional_cis_regulatory_region_GeneID:115801450	intergenic_gene_5prime-distal	.	ENCODEcCRE,Ensembl104,dbSUPER	NG_066108.1	Homo_sapiens
NC_000001.11	158691930	158692260	RefSeqFE_transcriptional_cis_regulatory_region_GeneID:115801451	intergenic_gene_5prime-distal	.	ENCODEcCRE,Ensembl104,dbSUPER	NG_066109.1	Homo_sapiens
NC_000001.11	159790290	159790668	RefSeqFE_transcriptional_cis_regulatory_region_GeneID:115801452	intergenic_gene_5prime-distal	.	ENCODEcCRE,Ensembl104	NG_066110.1	Homo_sapiens
NC_000001.11	160108958	160109253	RefSeqFE_enhancer_GeneID:112577506	intergenic_gene_5prime-distal	.	ENCODEcCRE,Ensembl104,dbSUPER	NG_060222.1	Homo_sapiens
NC_000001.11	160540198	160540493	RefSeqFE_enhancer_GeneID:112577507	gene-overlapping,intronic	lncRNA_GeneID:105371468_LOC105371468	ENCODEcCRE,Ensembl104,FANTOM5,dbSUPER	NG_060223.1	Homo_sapiens
NC_000001.11	161503005	161503327	RefSeqFE_transcriptional_cis_regulatory_region_GeneID:115801453	intergenic_gene_5prime-distal	.	ENCODEcCRE	NG_066111.1	Homo_sapiens
NC_000001.11	162144958	162145253	RefSeqFE_enhancer_GeneID:112577508	gene-overlapping,intronic	lncRNA_GeneID:105371475_LOC105371475[ClinVar_submission_gene,RSG_gene],protein_coding_GeneID:9722_NOS1AP[ClinVar_submission_gene,RSG_gene]	ENCODEcCRE,dbSUPER	NG_060224.1	Homo_sapiens
NC_000001.11	163085281	163085975	RefSeqFE_enhancer_GeneID:108281190	intergenic_gene_5prime-distal	.	ENCODEcCRE,Ensembl104	NG_051150.1	Homo_sapiens
NC_000001.11	163085513	163085749	RefSeqFE_epigenetically_modified_region_GeneID:108281190	intergenic_gene_5prime-distal	.	ENCODEcCRE,Ensembl104	NG_051150.1	Homo_sapiens
NC_000001.11	163472150	163473052	RefSeqFE_enhancer_GeneID:110120762	intergenic_gene_5prime-distal	.	ENCODEcCRE,Ensembl104,VISTA	NG_053387.1	Homo_sapiens
NC_000001.11	163538174	163539349	RefSeqFE_enhancer_GeneID:110121019	intergenic_gene_5prime-distal	.	Ensembl104,VISTA	NG_053640.1	Homo_sapiens
NC_000001.11	164611831	164612126	RefSeqFE_enhancer_GeneID:112577509	gene-overlapping,intronic	protein_coding_GeneID:5087_PBX1[ClinVar_submission_gene,RSG_gene]	ENCODEcCRE,FANTOM5,dbSUPER	NG_060225.1	Homo_sapiens
NC_000001.11	164634903	164636237	RefSeqFE_enhancer_GeneID:110121025	gene-overlapping,intronic	protein_coding_GeneID:5087_PBX1[ClinVar_submission_gene,RSG_gene]	ENCODEcCRE,Ensembl104,VISTA,dbSUPER	NG_053646.1	Homo_sapiens
NC_000001.11	164650800	164651927	RefSeqFE_enhancer_GeneID:110121037	gene-overlapping,intronic	protein_coding_GeneID:5087_PBX1[ClinVar_submission_gene,RSG_gene]	ENCODEcCRE,Ensembl104,VISTA,dbSUPER	NG_053658.1	Homo_sapiens
NC_000001.11	164699354	164700586	RefSeqFE_enhancer_GeneID:110121004	gene-overlapping,intronic	protein_coding_GeneID:5087_PBX1[ClinVar_submission_gene,RSG_gene]	ENCODEcCRE,Ensembl104,VISTA,dbSUPER	NG_053625.1	Homo_sapiens
NC_000001.11	164748260	164748780	RefSeqFE_enhancer_GeneID:108251792	gene-overlapping,intronic	protein_coding_GeneID:5087_PBX1[ClinVar_submission_gene,RSG_gene]	ENCODEcCRE,Ensembl104,FANTOM5,dbSUPER	NG_050993.1	Homo_sapiens
NC_000001.11	164748290	164748670	RefSeqFE_CAGE_cluster_GeneID:108251792	gene-overlapping,intronic	protein_coding_GeneID:5087_PBX1[ClinVar_submission_gene,RSG_gene]	ENCODEcCRE,Ensembl104,FANTOM5,dbSUPER	NG_050993.1	Homo_sapiens
NC_000001.11	164836269	164837557	RefSeqFE_enhancer_GeneID:110121021	gene-overlapping,intronic	protein_coding_GeneID:5087_PBX1[ClinVar_submission_gene,RSG_gene]	ENCODEcCRE,VISTA	NG_053642.1	Homo_sapiens
NC_000001.11	166950191	166950486	RefSeqFE_silencer_GeneID:113939980	gene-overlapping,intronic	protein_coding_GeneID:387597_ILDR2,protein_coding_GeneID:84944_MAEL	ENCODEcCRE	NG_063761.1	Homo_sapiens
NC_000001.11	167327716	167329809	RefSeqFE_enhancer_GeneID:110121063	UTR-overlapping,exon-overlapping,gene-overlapping	protein_coding_GeneID:5451_POU2F1	ENCODEcCRE,Ensembl104,VISTA,dbSUPER	NG_053683.1	Homo_sapiens
NC_000001.11	167548504	167548649	RefSeqFE_enhancer_GeneID:111464988	gene-overlapping,intronic	protein_coding_GeneID:8804_CREG1	ENCODEcCRE	NG_055905.1	Homo_sapiens
NC_000001.11	167548567	167548585	RefSeqFE_transcriptional_cis_regulatory_region_GeneID:111464988	gene-overlapping,intronic	protein_coding_GeneID:8804_CREG1	ENCODEcCRE	NG_055905.1	Homo_sapiens
NC_000001.11	168218809	168218977	RefSeqFE_transcriptional_cis_regulatory_region_GeneID:115801454	intergenic_gene_5prime-distal	.	Ensembl104	NG_066112.1	Homo_sapiens
NC_000001.11	168320990	168321285	RefSeqFE_enhancer_GeneID:112577510	intergenic_gene_5prime-distal	.	ENCODEcCRE,Ensembl104,dbSUPER	NG_060226.1	Homo_sapiens
NC_000001.11	169113630	169113925	RefSeqFE_enhancer_GeneID:112577511	gene-overlapping,intronic	protein_coding_GeneID:481_ATP1B1[ClinVar_submission_gene,RSG_gene]	ENCODEcCRE,Ensembl104,dbSUPER	NG_060227.1	Homo_sapiens
NC_000001.11	169113630	169113925	RefSeqFE_silencer_GeneID:112577511	gene-overlapping,intronic	protein_coding_GeneID:481_ATP1B1[ClinVar_submission_gene,RSG_gene]	ENCODEcCRE,Ensembl104,dbSUPER	NG_060227.1	Homo_sapiens
NC_000001.11	169576330	169576625	RefSeqFE_enhancer_GeneID:112577512	gene-overlapping,intronic	protein_coding_GeneID:2153_F5[ClinVar_submission_gene,LRG_gene,RSG_gene]	ENCODEcCRE	NG_060228.1	Homo_sapiens
NC_000001.11	169576330	169576625	RefSeqFE_silencer_GeneID:112577512	gene-overlapping,intronic	protein_coding_GeneID:2153_F5[ClinVar_submission_gene,LRG_gene,RSG_gene]	ENCODEcCRE	NG_060228.1	Homo_sapiens
NC_000001.11	169941254	169943938	RefSeqFE_enhancer_GeneID:110121105	gene-overlapping,intronic	protein_coding_GeneID:22920_KIFAP3[RSG_gene]	Ensembl104,VISTA	NG_053724.1	Homo_sapiens
NC_000001.11	171781348	171781643	RefSeqFE_enhancer_GeneID:112577513	intergenic_gene_5prime-proximal	.	ENCODEcCRE,Ensembl104	NG_060229.1	Homo_sapiens
NC_000001.11	172499628	172499923	RefSeqFE_enhancer_GeneID:112577514	intergenic_gene_5prime-distal	.	ENCODEcCRE,Ensembl104,FANTOM5,dbSUPER	NG_060230.1	Homo_sapiens
NC_000001.11	173670895	173671479	RefSeqFE_transcriptional_cis_regulatory_region_GeneID:115801455	UTR-overlapping,exon-overlapping,gene-overlapping	lncRNA_GeneID:105371619_LOC105371619,protein_coding_GeneID:339416_ANKRD45	ENCODEcCRE,FANTOM5	NG_066113.1	Homo_sapiens
NC_000001.11	174689590	174689885	RefSeqFE_enhancer_GeneID:112577515	gene-overlapping,intronic	protein_coding_GeneID:9910_RABGAP1L	ENCODEcCRE,Ensembl104	NG_060231.1	Homo_sapiens
NC_000001.11	176879980	176880125	RefSeqFE_enhancer_GeneID:111556138	gene-overlapping,intronic	protein_coding_GeneID:460_ASTN1[ClinVar_submission_gene]	ENCODEcCRE,Ensembl104	NG_055966.1	Homo_sapiens
NC_000001.11	176880044	176880062	RefSeqFE_transcriptional_cis_regulatory_region_GeneID:111556138	gene-overlapping,intronic	protein_coding_GeneID:460_ASTN1[ClinVar_submission_gene]	ENCODEcCRE,Ensembl104	NG_055966.1	Homo_sapiens
NC_000001.11	179016949	179017461	RefSeqFE_transcriptional_cis_regulatory_region_GeneID:115801456	intergenic_gene_5prime-distal	.	ENCODEcCRE,dbSUPER	NG_066114.1	Homo_sapiens
NC_000001.11	179882553	179882848	RefSeqFE_enhancer_GeneID:112577517	CDS-overlapping,exon-overlapping,gene-overlapping	protein_coding_GeneID:26092_TOR1AIP1[ClinVar_submission_gene,RSG_gene]	ENCODEcCRE,Ensembl104,dbSUPER	NG_060366.1	Homo_sapiens
NC_000001.11	180610411	180610898	RefSeqFE_transcriptional_cis_regulatory_region_GeneID:115804233	intergenic_gene_5prime-distal	.	ENCODEcCRE,Ensembl104	NG_066115.1	Homo_sapiens
NC_000001.11	181141426	181141976	RefSeqFE_transcriptional_cis_regulatory_region_GeneID:115804234	intergenic_gene_5prime-distal	.	ENCODEcCRE,Ensembl104,FANTOM5,dbSUPER	NG_066116.1	Homo_sapiens
NC_000001.11	181151912	181154518	RefSeqFE_enhancer_GeneID:110121215	intergenic_gene_5prime-distal	.	ENCODEcCRE,Ensembl104,FANTOM5,VISTA,dbSUPER	NG_053831.1	Homo_sapiens
NC_000001.11	181855453	181855748	RefSeqFE_enhancer_GeneID:112577519	intergenic_gene_5prime-distal	.	.	NG_060367.1	Homo_sapiens
NC_000001.11	181855453	181855748	RefSeqFE_silencer_GeneID:112577519	intergenic_gene_5prime-distal	.	.	NG_060367.1	Homo_sapiens
NC_000001.11	182291725	182292225	RefSeqFE_enhancer_GeneID:111365143	gene-overlapping,intronic	lncRNA_GeneID:400799_LINC01344	ENCODEcCRE,Ensembl104,dbSUPER	NG_055679.1	Homo_sapiens
NC_000001.11	182291903	182292048	RefSeqFE_enhancer_GeneID:111365143	gene-overlapping,intronic	lncRNA_GeneID:400799_LINC01344	ENCODEcCRE,Ensembl104,dbSUPER	NG_055679.1	Homo_sapiens
NC_000001.11	182291969	182291981	RefSeqFE_transcriptional_cis_regulatory_region_GeneID:111365143	gene-overlapping,intronic	lncRNA_GeneID:400799_LINC01344	Ensembl104,dbSUPER	NG_055679.1	Homo_sapiens
NC_000001.11	182337951	182338499	RefSeqFE_transcriptional_cis_regulatory_region_GeneID:115804235	intergenic_gene_5prime-distal	.	ENCODEcCRE	NG_066117.1	Homo_sapiens
NC_000001.11	182339030	182339323	RefSeqFE_transcriptional_cis_regulatory_region_GeneID:115804236	intergenic_gene_5prime-distal	.	ENCODEcCRE,Ensembl104	NG_066118.1	Homo_sapiens
NC_000001.11	182962573	182962868	RefSeqFE_enhancer_GeneID:112577520	intergenic_gene_5prime-distal	.	ENCODEcCRE,Ensembl104	NG_060368.1	Homo_sapiens
NC_000001.11	183604233	183604528	RefSeqFE_enhancer_GeneID:112577521	gene-overlapping,intronic	lncRNA_GeneID:107985235_LOC107985235	ENCODEcCRE,Ensembl104,FANTOM5,dbSUPER	NG_060369.1	Homo_sapiens
NC_000001.11	183611756	183612264	RefSeqFE_enhancer_GeneID:108318669	intergenic_gene_5prime-distal	.	dbSUPER	NG_051155.1	Homo_sapiens
NC_000001.11	183611923	183612082	RefSeqFE_epigenetically_modified_region_GeneID:108318669	intergenic_gene_5prime-distal	.	dbSUPER	NG_051155.1	Homo_sapiens
NC_000001.11	184002287	184002432	RefSeqFE_enhancer_GeneID:111501763	gene-overlapping,intronic	protein_coding_GeneID:23127_COLGALT2	ENCODEcCRE,Ensembl104,dbSUPER	NG_055931.1	Homo_sapiens
NC_000001.11	184002354	184002365	RefSeqFE_transcriptional_cis_regulatory_region_GeneID:111501763	gene-overlapping,intronic	protein_coding_GeneID:23127_COLGALT2	ENCODEcCRE,Ensembl104,dbSUPER	NG_055931.1	Homo_sapiens
NC_000001.11	184051514	184051809	RefSeqFE_enhancer_GeneID:112577522	CDS-overlapping,exon-overlapping,gene-overlapping	protein_coding_GeneID:116461_TSEN15[ClinVar_submission_gene,RSG_gene]	ENCODEcCRE,Ensembl104	NG_060370.1	Homo_sapiens
NC_000001.11	185917656	185917951	RefSeqFE_silencer_GeneID:113939981	gene-overlapping,intronic	protein_coding_GeneID:83872_HMCN1[ClinVar_submission_gene,RSG_gene]	Ensembl104	NG_063762.1	Homo_sapiens
NC_000001.11	188668051	188668618	RefSeqFE_DNAseI_hypersensitive_site_GeneID:108281185	intergenic_gene_5prime-distal	.	ENCODEcCRE,Ensembl104	NG_051145.1	Homo_sapiens
NC_000001.11	188668051	188668618	RefSeqFE_enhancer_GeneID:108281185	intergenic_gene_5prime-distal	.	ENCODEcCRE,Ensembl104	NG_051145.1	Homo_sapiens
NC_000001.11	188782237	188782532	RefSeqFE_enhancer_GeneID:112577523	intergenic_gene_5prime-distal	.	ENCODEcCRE,Ensembl104	NG_060371.1	Homo_sapiens
NC_000001.11	192701090	192701235	RefSeqFE_enhancer_GeneID:111556116	intergenic_gene_5prime-distal	.	ENCODEcCRE,Ensembl104	NG_055956.1	Homo_sapiens
NC_000001.11	192701156	192701170	RefSeqFE_transcriptional_cis_regulatory_region_GeneID:111556116	intergenic_gene_5prime-distal	.	Ensembl104	NG_055956.1	Homo_sapiens
NC_000001.11	198294431	198296612	RefSeqFE_enhancer_GeneID:110121056	gene-overlapping,intronic	protein_coding_GeneID:140609_NEK7	ENCODEcCRE,Ensembl104,VISTA	NG_053676.1	Homo_sapiens
NC_000001.11	198633685	198634101	RefSeqFE_transcriptional_cis_regulatory_region_GeneID:115804237	intergenic_gene_5prime-distal	.	ENCODEcCRE,Ensembl104,FANTOM5,dbSUPER	NG_066119.1	Homo_sapiens
NC_000001.11	198681669	198682240	RefSeqFE_enhancer_GeneID:108281163	gene-overlapping,intronic	protein_coding_GeneID:5788_PTPRC[ClinVar_submission_gene,RSG_gene]	ENCODEcCRE,Ensembl104,FANTOM5,dbSUPER	NG_051123.1	Homo_sapiens
NC_000001.11	198681800	198682514	RefSeqFE_CAGE_cluster_GeneID:108281163	gene-overlapping,intronic	protein_coding_GeneID:5788_PTPRC[ClinVar_submission_gene,RSG_gene]	ENCODEcCRE,Ensembl104,FANTOM5,dbSUPER	NG_051123.1	Homo_sapiens
NC_000001.11	200072515	200073089	RefSeqFE_enhancer_GeneID:107988045	gene-overlapping,intronic	protein_coding_GeneID:2494_NR5A2[ClinVar_submission_gene,RSG_gene]	ENCODEcCRE,Ensembl104	NG_050806.1	Homo_sapiens
NC_000001.11	201019440	201019735	RefSeqFE_enhancer_GeneID:112577526	gene-overlapping,intronic	protein_coding_GeneID:23046_KIF21B[ClinVar_submission_gene,RSG_gene]	ENCODEcCRE,Ensembl104,dbSUPER	NG_060445.1	Homo_sapiens
NC_000001.11	201028560	201028855	RefSeqFE_enhancer_GeneID:112577527	UTR-overlapping,exon-overlapping,gene-overlapping	lncRNA_GeneID:101929305_LOC101929305	ENCODEcCRE,dbSUPER	NG_060446.1	Homo_sapiens
NC_000001.11	201376209	201376706	RefSeqFE_enhancer_GeneID:111721704	gene-overlapping,intronic	protein_coding_GeneID:7139_TNNT2[ClinVar_submission_gene,RSG_gene]	ENCODEcCRE,Ensembl104,dbSUPER	NG_056147.1	Homo_sapiens
NC_000001.11	201566848	201567635	RefSeqFE_transcriptional_cis_regulatory_region_GeneID:115804238	intergenic_gene_5prime-distal	.	ENCODEcCRE,Ensembl104,dbSUPER	NG_066120.1	Homo_sapiens
NC_000001.11	201828940	201829235	RefSeqFE_enhancer_GeneID:112577528	UTR-overlapping,exon-overlapping,gene-overlapping	lncRNA_GeneID:100873949_IPO9-AS1,protein_coding_GeneID:55705_IPO9	ENCODEcCRE,Ensembl104	NG_060447.1	Homo_sapiens
NC_000001.11	201854480	201854775	RefSeqFE_enhancer_GeneID:112577529	CDS-overlapping,exon-overlapping,gene-overlapping	protein_coding_GeneID:55705_IPO9	.	NG_060448.1	Homo_sapiens
NC_000001.11	201888740	201889035	RefSeqFE_enhancer_GeneID:112577530	CDS-overlapping,exon-overlapping,gene-overlapping	protein_coding_GeneID:149345_SHISA4	ENCODEcCRE,Ensembl104,dbSUPER	NG_060449.1	Homo_sapiens
NC_000001.11	201989698	201992130	RefSeqFE_enhancer_GeneID:114827844	UTR-overlapping,exon-overlapping,gene-overlapping	lncRNA_GeneID:112268254_LOC112268254,protein_coding_GeneID:6051_RNPEP	ENCODEcCRE,VISTA	NG_065200.1	Homo_sapiens
NC_000001.11	202075982	202076422	RefSeqFE_transcriptional_cis_regulatory_region_GeneID:115804239	intergenic_gene_5prime-distal	.	ENCODEcCRE,Ensembl104,dbSUPER	NG_066121.1	Homo_sapiens
NC_000001.11	202087061	202087206	RefSeqFE_enhancer_GeneID:111429603	intergenic_gene_5prime-distal	.	ENCODEcCRE,Ensembl104,FANTOM5,dbSUPER	NG_055882.1	Homo_sapiens
NC_000001.11	202087128	202087140	RefSeqFE_transcriptional_cis_regulatory_region_GeneID:111429603	intergenic_gene_5prime-distal	.	ENCODEcCRE,Ensembl104,FANTOM5,dbSUPER	NG_055882.1	Homo_sapiens
NC_000001.11	202118781	202119349	RefSeqFE_transcriptional_cis_regulatory_region_GeneID:115804240	CDS-overlapping,exon-overlapping,gene-overlapping	protein_coding_GeneID:9283_GPR37L1	ENCODEcCRE,Ensembl104,dbSUPER	NG_066122.1	Homo_sapiens
NC_000001.11	203005702	203006052	RefSeqFE_transcriptional_cis_regulatory_region_GeneID:115804242	gene-overlapping,intronic	transcribed_pseudogene_GeneID:100506747_MGAT4FP	ENCODEcCRE,Ensembl104	NG_066125.1	Homo_sapiens
NC_000001.11	203311684	203312280	RefSeqFE_transcriptional_cis_regulatory_region_GeneID:115804243	intergenic_gene_5prime-distal	.	ENCODEcCRE,dbSUPER	NG_066126.1	Homo_sapiens
NC_000001.11	203861380	203861675	RefSeqFE_enhancer_GeneID:112577531	UTR-overlapping,exon-overlapping,gene-overlapping	protein_coding_GeneID:6635_SNRPE[RSG_gene]	ENCODEcCRE,Ensembl104	NG_060451.1	Homo_sapiens
NC_000001.11	204093386	204093531	RefSeqFE_enhancer_GeneID:111429612	gene-overlapping,intronic	protein_coding_GeneID:9580_SOX13	ENCODEcCRE,dbSUPER	NG_055889.1	Homo_sapiens
NC_000001.11	204093451	204093465	RefSeqFE_transcriptional_cis_regulatory_region_GeneID:111429612	gene-overlapping,intronic	protein_coding_GeneID:9580_SOX13	ENCODEcCRE,dbSUPER	NG_055889.1	Homo_sapiens
NC_000001.11	204162165	204166193	RefSeqFE_silencer_GeneID:107548112	gene-overlapping,intronic	protein_coding_GeneID:5972_REN[ClinVar_submission_gene,RSG_gene]	ENCODEcCRE,Ensembl104	NG_046884.1	Homo_sapiens
NC_000001.11	204162633	204162713	RefSeqFE_protein_binding_site_CCCTC-binding_factor_GeneID:107548112	gene-overlapping,intronic	protein_coding_GeneID:5972_REN[ClinVar_submission_gene,RSG_gene]	ENCODEcCRE,Ensembl104	NG_046884.1	Homo_sapiens
NC_000001.11	204166321	204178479	RefSeqFE_promoter_GeneID:107548112	intergenic_gene_5prime-proximal	.	ENCODEcCRE,Ensembl104	NG_046884.1	Homo_sapiens
NC_000001.11	204166333	204166485	RefSeqFE_promoter_GeneID:107548112	intergenic_gene_5prime-proximal	.	.	NG_046884.1	Homo_sapiens
NC_000001.11	204166335	204166371	RefSeqFE_protein_binding_site_ETS_proto-oncogene_1_transcription_factor_GeneID:107548112	intergenic_gene_5prime-proximal	.	.	NG_046884.1	Homo_sapiens
NC_000001.11	204166396	204166419	RefSeqFE_transcriptional_cis_regulatory_region_GeneID:107548112	intergenic_gene_5prime-proximal	.	.	NG_046884.1	Homo_sapiens
NC_000001.11	204166403	204166711	RefSeqFE_transcriptional_cis_regulatory_region_GeneID:107548112	intergenic_gene_5prime-proximal	.	ENCODEcCRE	NG_046884.1	Homo_sapiens
NC_000001.11	204166444	204166478	RefSeqFE_protein_binding_site_nuclear_receptor_subfamily_1_group_H_member_3_GeneID:107548112	intergenic_gene_5prime-proximal	.	.	NG_046884.1	Homo_sapiens
NC_000001.11	204166472	204166486	RefSeqFE_protein_binding_site_peroxisome_proliferator_activated_receptor_gamma_GeneID:107548112	intergenic_gene_5prime-proximal	.	.	NG_046884.1	Homo_sapiens
NC_000001.11	204166472	204166486	RefSeqFE_protein_binding_site_retinoid_X_receptor_alpha_GeneID:107548112	intergenic_gene_5prime-proximal	.	.	NG_046884.1	Homo_sapiens
NC_000001.11	204166485	204166920	RefSeqFE_promoter_GeneID:107548112	intergenic_gene_5prime-proximal	.	ENCODEcCRE	NG_046884.1	Homo_sapiens
NC_000001.11	204166535	204166571	RefSeqFE_protein_binding_site_activating_transcription_factor_1_GeneID:107548112	intergenic_gene_5prime-proximal	.	ENCODEcCRE	NG_046884.1	Homo_sapiens
NC_000001.11	204166535	204166571	RefSeqFE_protein_binding_site_cAMP_responsive_element_binding_protein_1_GeneID:107548112	intergenic_gene_5prime-proximal	.	ENCODEcCRE	NG_046884.1	Homo_sapiens
NC_000001.11	204166565	204166601	RefSeqFE_protein_binding_site_nuclear_receptor_subfamily_2_group_F_member_2_GeneID:107548112	intergenic_gene_5prime-proximal	.	ENCODEcCRE	NG_046884.1	Homo_sapiens
NC_000001.11	204166580	204166596	RefSeqFE_transcriptional_cis_regulatory_region_GeneID:107548112	intergenic_gene_5prime-proximal	.	ENCODEcCRE	NG_046884.1	Homo_sapiens
NC_000001.11	204167382	204167403	RefSeqFE_response_element_GeneID:107548112	intergenic_gene_5prime-proximal	.	.	NG_046884.1	Homo_sapiens
NC_000001.11	204168089	204168144	RefSeqFE_response_element_GeneID:107548112	intergenic_gene_5prime-proximal	.	.	NG_046884.1	Homo_sapiens
NC_000001.11	204168107	204168131	RefSeqFE_protein_binding_site_apurinic/apyrimidinic_endodeoxyribonuclease_1_GeneID:107548112	intergenic_gene_5prime-proximal	.	.	NG_046884.1	Homo_sapiens
NC_000001.11	204169156	204170255	RefSeqFE_transcriptional_cis_regulatory_region_GeneID:107548112	intergenic_gene_5prime-distal	.	ENCODEcCRE,Ensembl104	NG_046884.1	Homo_sapiens
NC_000001.11	204171622	204172214	RefSeqFE_enhancer_GeneID:107548112	intergenic_gene_5prime-distal	.	ENCODEcCRE,Ensembl104	NG_046884.1	Homo_sapiens
NC_000001.11	204171895	204172121	RefSeqFE_enhancer_GeneID:107548112	intergenic_gene_5prime-distal	.	ENCODEcCRE,Ensembl104	NG_046884.1	Homo_sapiens
NC_000001.11	204171961	204172000	RefSeqFE_transcriptional_cis_regulatory_region_GeneID:107548112	intergenic_gene_5prime-distal	.	ENCODEcCRE,Ensembl104	NG_046884.1	Homo_sapiens
NC_000001.11	204177346	204177565	RefSeqFE_conserved_region_GeneID:107548112	intergenic_gene_5prime-distal	.	Ensembl104	NG_046884.1	Homo_sapiens
NC_000001.11	204177351	204177371	RefSeqFE_response_element_GeneID:107548112	intergenic_gene_5prime-distal	.	Ensembl104	NG_046884.1	Homo_sapiens
NC_000001.11	204177353	204177565	RefSeqFE_enhancer_GeneID:107548112	intergenic_gene_5prime-distal	.	Ensembl104	NG_046884.1	Homo_sapiens
NC_000001.11	204177354	204177355	RefSeqFE_sequence_comparison_GeneID:107548112	intergenic_gene_5prime-distal	.	Ensembl104	NG_046884.1	Homo_sapiens
NC_000001.11	204177387	204177395	RefSeqFE_response_element_GeneID:107548112	intergenic_gene_5prime-distal	.	Ensembl104	NG_046884.1	Homo_sapiens
NC_000001.11	204177458	204177479	RefSeqFE_protein_binding_site_Wilms_tumor_1_-KTS_isoform_GeneID:107548112	intergenic_gene_5prime-distal	.	.	NG_046884.1	Homo_sapiens
NC_000001.11	204266613	204266758	RefSeqFE_enhancer_GeneID:111365207	gene-overlapping,intronic	protein_coding_GeneID:22874_PLEKHA6	ENCODEcCRE,Ensembl104,dbSUPER	NG_055822.1	Homo_sapiens
NC_000001.11	204266678	204266692	RefSeqFE_transcriptional_cis_regulatory_region_GeneID:111365207	gene-overlapping,intronic	protein_coding_GeneID:22874_PLEKHA6	ENCODEcCRE,Ensembl104,dbSUPER	NG_055822.1	Homo_sapiens
NC_000001.11	204454829	204455807	RefSeqFE_enhancer_GeneID:110121081	gene-overlapping,intronic	protein_coding_GeneID:5287_PIK3C2B	ENCODEcCRE,VISTA,dbSUPER	NG_053701.1	Homo_sapiens
NC_000001.11	205850060	205850355	RefSeqFE_enhancer_GeneID:112577532	UTR-overlapping,exon-overlapping,gene-overlapping	lncRNA_GeneID:107985250_LOC107985250,protein_coding_GeneID:148811_PM20D1	ENCODEcCRE,Ensembl104	NG_060452.1	Homo_sapiens
NC_000001.11	207746400	207746696	RefSeqFE_transcriptional_cis_regulatory_region_GeneID:115804244	intergenic_gene_5prime-distal	.	ENCODEcCRE,Ensembl104,dbSUPER	NG_066127.1	Homo_sapiens
NC_000001.11	207748123	207748418	RefSeqFE_enhancer_GeneID:112577533	intergenic_gene_5prime-distal	.	ENCODEcCRE,FANTOM5,dbSUPER	NG_060453.1	Homo_sapiens
NC_000001.11	208219663	208219958	RefSeqFE_enhancer_GeneID:112577534	gene-overlapping,intronic	lncRNA_GeneID:105372884_LOC105372884[ClinVar_submission_gene],protein_coding_GeneID:5362_PLXNA2[ClinVar_submission_gene]	ENCODEcCRE,Ensembl104,dbSUPER	NG_060454.1	Homo_sapiens
NC_000001.11	209815704	209816479	RefSeqFE_enhancer_GeneID:110120807	intergenic_gene_5prime-distal	.	ENCODEcCRE,Ensembl104,FANTOM5,VISTA,dbSUPER	NG_053432.1	Homo_sapiens
NC_000001.11	209937663	209937958	RefSeqFE_silencer_GeneID:113939983	intergenic_gene_5prime-proximal	.	ENCODEcCRE,Ensembl104	NG_063763.1	Homo_sapiens
NC_000001.11	210393704	210393999	RefSeqFE_enhancer_GeneID:112577535	gene-overlapping,intronic	protein_coding_GeneID:55733_HHAT[ClinVar_submission_gene]	ENCODEcCRE,Ensembl104,FANTOM5	NG_060455.1	Homo_sapiens
NC_000001.11	210671687	210671982	RefSeqFE_silencer_GeneID:113939984	gene-overlapping,intronic	protein_coding_GeneID:55733_HHAT[ClinVar_submission_gene]	ENCODEcCRE,Ensembl104	NG_063764.1	Homo_sapiens
NC_000001.11	211616566	211616861	RefSeqFE_enhancer_GeneID:112577536	intergenic_gene_5prime-distal	.	ENCODEcCRE,Ensembl104,dbSUPER	NG_060456.1	Homo_sapiens
NC_000001.11	211724786	211725081	RefSeqFE_enhancer_GeneID:112577537	intergenic_gene_5prime-distal	.	Ensembl104	NG_060457.1	Homo_sapiens
NC_000001.11	212430994	212431282	RefSeqFE_transcriptional_cis_regulatory_region_GeneID:115804245	gene-overlapping,intronic	lncRNA_GeneID:105372906_LOC105372906	ENCODEcCRE,dbSUPER	NG_066128.1	Homo_sapiens
NC_000001.11	212531403	212533951	RefSeqFE_enhancer_GeneID:110121257	intergenic_gene_5prime-distal	.	ENCODEcCRE,Ensembl104,FANTOM5,VISTA	NG_053872.1	Homo_sapiens
NC_000001.11	212596346	212596641	RefSeqFE_enhancer_GeneID:112577538	gene-overlapping,intronic	protein_coding_GeneID:467_ATF3[RSG_gene]	ENCODEcCRE,FANTOM5,dbSUPER	NG_060458.1	Homo_sapiens
NC_000001.11	212967826	212968121	RefSeqFE_enhancer_GeneID:112577542	gene-overlapping,intronic	protein_coding_GeneID:79805_VASH2	ENCODEcCRE,Ensembl104,dbSUPER	NG_060462.1	Homo_sapiens
NC_000001.11	213045206	213046165	RefSeqFE_transcriptional_cis_regulatory_region_GeneID:115804246	intergenic_gene_5prime-distal	.	ENCODEcCRE,Ensembl104	NG_066129.1	Homo_sapiens
NC_000001.11	213324768	213327791	RefSeqFE_enhancer_GeneID:110121057	gene-overlapping,intronic	protein_coding_GeneID:26750_RPS6KC1[ClinVar_submission_gene]	ENCODEcCRE,FANTOM5,VISTA	NG_053677.1	Homo_sapiens
NC_000001.11	213424620	213426181	RefSeqFE_enhancer_GeneID:110120610	gene-overlapping,intronic	lncRNA_GeneID:105372912_LOC105372912	VISTA	NG_053238.1	Homo_sapiens
NC_000001.11	214107251	214108737	RefSeqFE_enhancer_GeneID:110121306	gene-overlapping,intronic	lncRNA_GeneID:105372911_LINC02775	ENCODEcCRE,VISTA	NG_053921.1	Homo_sapiens
NC_000001.11	218034089	218035156	RefSeqFE_enhancer_GeneID:110121042	gene-overlapping,intronic	lncRNA_GeneID:105372922_LOC105372922	ENCODEcCRE,Ensembl104,VISTA	NG_053662.1	Homo_sapiens
NC_000001.11	221715590	221715735	RefSeqFE_enhancer_GeneID:111429604	gene-overlapping,intronic	protein_coding_GeneID:11221_DUSP10	ENCODEcCRE,Ensembl104,dbSUPER	NG_055883.1	Homo_sapiens
NC_000001.11	221715657	221715669	RefSeqFE_transcriptional_cis_regulatory_region_GeneID:111429604	gene-overlapping,intronic	protein_coding_GeneID:11221_DUSP10	ENCODEcCRE,dbSUPER	NG_055883.1	Homo_sapiens
NC_000001.11	221973077	221973528	RefSeqFE_mobile_genetic_element_GeneID:107325941	gene-overlapping,intronic	lncRNA_GeneID:105372950_LINC02257,lncRNA_GeneID:110806276_LINC02474	.	NG_046769.1	Homo_sapiens
NC_000001.11	221975431	221978506	RefSeqFE_mobile_genetic_element_GeneID:107325941	gene-overlapping,intronic	lncRNA_GeneID:105372950_LINC02257,lncRNA_GeneID:110806276_LINC02474	Ensembl104	NG_046769.1	Homo_sapiens
NC_000001.11	221977063	221977223	RefSeqFE_non_allelic_homologous_recombination_region_GeneID:107325941	gene-overlapping,intronic	lncRNA_GeneID:105372950_LINC02257,lncRNA_GeneID:110806276_LINC02474	Ensembl104	NG_046769.1	Homo_sapiens
NC_000001.11	221977225	221977278	RefSeqFE_non_allelic_homologous_recombination_region_GeneID:107325941	gene-overlapping,intronic	lncRNA_GeneID:105372950_LINC02257,lncRNA_GeneID:110806276_LINC02474	Ensembl104	NG_046769.1	Homo_sapiens
NC_000001.11	223026735	223029699	RefSeqFE_mobile_genetic_element_GeneID:107325942	intergenic_gene_5prime-distal	.	dbSUPER	NG_046770.1	Homo_sapiens
NC_000001.11	223028361	223028521	RefSeqFE_non_allelic_homologous_recombination_region_GeneID:107325942	intergenic_gene_5prime-distal	.	dbSUPER	NG_046770.1	Homo_sapiens
NC_000001.11	223028523	223028576	RefSeqFE_non_allelic_homologous_recombination_region_GeneID:107325942	intergenic_gene_5prime-distal	.	dbSUPER	NG_046770.1	Homo_sapiens
NC_000001.11	223029701	223030156	RefSeqFE_mobile_genetic_element_GeneID:107325942	intergenic_gene_5prime-distal	.	ENCODEcCRE,dbSUPER	NG_046770.1	Homo_sapiens
NC_000001.11	224160346	224160641	RefSeqFE_enhancer_GeneID:112577543	UTR-overlapping,exon-overlapping,gene-overlapping	protein_coding_GeneID:23219_FBXO28[ClinVar_submission_gene]	Ensembl104	NG_060463.1	Homo_sapiens
NC_000001.11	224160346	224160641	RefSeqFE_silencer_GeneID:112577543	UTR-overlapping,exon-overlapping,gene-overlapping	protein_coding_GeneID:23219_FBXO28[ClinVar_submission_gene]	Ensembl104	NG_060463.1	Homo_sapiens
NC_000001.11	224334046	224334341	RefSeqFE_enhancer_GeneID:112577544	intergenic_gene_5prime-distal	.	ENCODEcCRE,Ensembl104	NG_060464.1	Homo_sapiens
NC_000001.11	225444809	225445349	RefSeqFE_transcriptional_cis_regulatory_region_GeneID:115804247	intergenic_gene_5prime-distal	.	ENCODEcCRE,Ensembl104,dbSUPER	NG_066130.1	Homo_sapiens
NC_000001.11	225766687	225768183	RefSeqFE_enhancer_GeneID:110121307	intergenic_gene_5prime-distal	.	ENCODEcCRE,FANTOM5,VISTA,dbSUPER	NG_053922.1	Homo_sapiens
NC_000001.11	225928237	225928890	RefSeqFE_transcriptional_cis_regulatory_region_GeneID:115804248	intergenic_gene_5prime-distal	.	ENCODEcCRE,dbSUPER	NG_066131.1	Homo_sapiens
NC_000001.11	226828087	226828382	RefSeqFE_enhancer_GeneID:112577545	intergenic_gene_5prime-distal	.	ENCODEcCRE,Ensembl104,VISTA,dbSUPER	NG_060465.1	Homo_sapiens
NC_000001.11	228341067	228341362	RefSeqFE_enhancer_GeneID:112577546	CDS-overlapping,exon-overlapping,gene-overlapping	protein_coding_GeneID:84033_OBSCN[ClinVar_submission_gene,RSG_gene]	ENCODEcCRE,Ensembl104	NG_060466.1	Homo_sapiens
NC_000001.11	228490507	228490802	RefSeqFE_enhancer_GeneID:112577547	gene-overlapping,intronic	protein_coding_GeneID:149603_RNF187	ENCODEcCRE,FANTOM5,dbSUPER	NG_060467.1	Homo_sapiens
NC_000001.11	228500967	228501262	RefSeqFE_enhancer_GeneID:112577548	intergenic_gene_5prime-distal	.	ENCODEcCRE,Ensembl104,FANTOM5,dbSUPER	NG_060468.1	Homo_sapiens
NC_000001.11	229430761	229431056	RefSeqFE_silencer_GeneID:113939987	intergenic_gene_5prime-distal	.	ENCODEcCRE,Ensembl104,dbSUPER	NG_063766.1	Homo_sapiens
NC_000001.11	230127001	230127296	RefSeqFE_enhancer_GeneID:112577552	gene-overlapping,intronic	protein_coding_GeneID:2590_GALNT2[RSG_gene]	ENCODEcCRE,dbSUPER	NG_060470.1	Homo_sapiens
NC_000001.11	230332762	230333057	RefSeqFE_enhancer_GeneID:112577554	CDS-overlapping,exon-overlapping,gene-overlapping	protein_coding_GeneID:79605_PGBD5	ENCODEcCRE,dbSUPER	NG_060471.1	Homo_sapiens
NC_000001.11	230750692	230754328	RefSeqFE_enhancer_GeneID:110121263	gene-overlapping,intronic	protein_coding_GeneID:10753_CAPN9	ENCODEcCRE,FANTOM5,VISTA,dbSUPER	NG_053878.1	Homo_sapiens
NC_000001.11	230848776	230852235	RefSeqFE_enhancer_GeneID:110121205	gene-overlapping,intronic	protein_coding_GeneID:84886_C1orf198	ENCODEcCRE,Ensembl104,VISTA,dbSUPER	NG_053822.1	Homo_sapiens
NC_000001.11	231046854	231047143	RefSeqFE_transcriptional_cis_regulatory_region_GeneID:115804249	intergenic_gene_5prime-distal	.	.	NG_066132.1	Homo_sapiens
NC_000001.11	231049364	231049644	RefSeqFE_transcriptional_cis_regulatory_region_GeneID:115804250	intergenic_gene_5prime-distal	.	ENCODEcCRE,Ensembl104	NG_066133.1	Homo_sapiens
NC_000001.11	231053777	231053876	RefSeqFE_transcriptional_cis_regulatory_region_GeneID:115804251	intergenic_gene_5prime-distal	.	ENCODEcCRE	NG_066134.1	Homo_sapiens
NC_000001.11	231065594	231066065	RefSeqFE_transcriptional_cis_regulatory_region_GeneID:115804252	intergenic_gene_5prime-distal	.	ENCODEcCRE,Ensembl104	NG_066135.1	Homo_sapiens
NC_000001.11	234583797	234583942	RefSeqFE_enhancer_GeneID:111365197	intergenic_gene_5prime-distal	.	ENCODEcCRE,Ensembl104,dbSUPER	NG_055812.1	Homo_sapiens
NC_000001.11	234583864	234583875	RefSeqFE_transcriptional_cis_regulatory_region_GeneID:111365197	intergenic_gene_5prime-distal	.	ENCODEcCRE,Ensembl104,dbSUPER	NG_055812.1	Homo_sapiens
NC_000001.11	234643122	234643417	RefSeqFE_enhancer_GeneID:112577555	intergenic_gene_5prime-distal	.	ENCODEcCRE,Ensembl104,dbSUPER	NG_060472.1	Homo_sapiens
NC_000001.11	234643122	234643417	RefSeqFE_silencer_GeneID:112577555	intergenic_gene_5prime-distal	.	ENCODEcCRE,Ensembl104,dbSUPER	NG_060472.1	Homo_sapiens
NC_000001.11	234700241	234700536	RefSeqFE_enhancer_GeneID:112577556	intergenic_gene_5prime-distal	.	ENCODEcCRE,Ensembl104,dbSUPER	NG_060473.1	Homo_sapiens
NC_000001.11	234876447	234876592	RefSeqFE_enhancer_GeneID:111365208	UTR-overlapping,exon-overlapping,gene-overlapping	lncRNA_GeneID:107985365_LOC107985365	ENCODEcCRE,Ensembl104,FANTOM5,dbSUPER	NG_055823.1	Homo_sapiens
NC_000001.11	234876510	234876528	RefSeqFE_transcriptional_cis_regulatory_region_GeneID:111365208	UTR-overlapping,exon-overlapping,gene-overlapping	lncRNA_GeneID:107985365_LOC107985365	ENCODEcCRE,Ensembl104,FANTOM5,dbSUPER	NG_055823.1	Homo_sapiens
NC_000001.11	234986961	234987256	RefSeqFE_enhancer_GeneID:112577557	intergenic_gene_5prime-distal	.	ENCODEcCRE,FANTOM5,dbSUPER	NG_060474.1	Homo_sapiens
NC_000001.11	235011901	235012196	RefSeqFE_enhancer_GeneID:112577558	intergenic_gene_5prime-distal	.	ENCODEcCRE,dbSUPER	NG_060475.1	Homo_sapiens
NC_000001.11	235048141	235048436	RefSeqFE_enhancer_GeneID:112577559	intergenic_gene_5prime-distal	.	ENCODEcCRE,FANTOM5,dbSUPER	NG_060476.1	Homo_sapiens
NC_000001.11	235971491	235974491	RefSeqFE_meiotic_recombination_region_GeneID:107546747	UTR-overlapping,exon-overlapping,gene-overlapping	lncRNA_GeneID:105373212_LINC02768	ENCODEcCRE,Ensembl104,FANTOM5,dbSUPER	NG_046863.1	Homo_sapiens
NC_000001.11	235972207	235973501	RefSeqFE_meiotic_recombination_region_GeneID:107546747	UTR-overlapping,exon-overlapping,gene-overlapping	lncRNA_GeneID:105373212_LINC02768	ENCODEcCRE,Ensembl104,FANTOM5,dbSUPER	NG_046863.1	Homo_sapiens
NC_000001.11	235972462	235972478	RefSeqFE_nucleotide_motif_GeneID:107546747	UTR-overlapping,exon-overlapping,gene-overlapping	lncRNA_GeneID:105373212_LINC02768	ENCODEcCRE,Ensembl104,FANTOM5,dbSUPER	NG_046863.1	Homo_sapiens
NC_000001.11	235994132	236000886	RefSeqFE_meiotic_recombination_region_GeneID:107546746	gene-overlapping,intronic	protein_coding_GeneID:4811_NID1[ClinVar_submission_gene,RSG_gene]	ENCODEcCRE,Ensembl104,FANTOM5,dbSUPER	NG_046862.1	Homo_sapiens
NC_000001.11	235996841	235999483	RefSeqFE_meiotic_recombination_region_GeneID:107546746	gene-overlapping,intronic	protein_coding_GeneID:4811_NID1[ClinVar_submission_gene,RSG_gene]	ENCODEcCRE,Ensembl104,FANTOM5,dbSUPER	NG_046862.1	Homo_sapiens
NC_000001.11	235997889	236001318	RefSeqFE_meiotic_recombination_region_GeneID:107546746	gene-overlapping,intronic	protein_coding_GeneID:4811_NID1[ClinVar_submission_gene,RSG_gene]	ENCODEcCRE,Ensembl104,FANTOM5,dbSUPER	NG_046862.1	Homo_sapiens
NC_000001.11	235999610	235999611	RefSeqFE_sequence_feature_GeneID:107546746	gene-overlapping,intronic	protein_coding_GeneID:4811_NID1[ClinVar_submission_gene,RSG_gene]	ENCODEcCRE,Ensembl104,FANTOM5,dbSUPER	NG_046862.1	Homo_sapiens
NC_000001.11	236000984	236000985	RefSeqFE_sequence_feature_GeneID:107546746	gene-overlapping,intronic	protein_coding_GeneID:4811_NID1[ClinVar_submission_gene,RSG_gene]	Ensembl104,dbSUPER	NG_046862.1	Homo_sapiens
NC_000001.11	236036057	236040144	RefSeqFE_meiotic_recombination_region_GeneID:107546745	gene-overlapping,intronic	protein_coding_GeneID:4811_NID1[ClinVar_submission_gene,RSG_gene]	ENCODEcCRE,Ensembl104,dbSUPER	NG_046861.1	Homo_sapiens
NC_000001.11	236037746	236037762	RefSeqFE_nucleotide_motif_GeneID:107546745	gene-overlapping,intronic	protein_coding_GeneID:4811_NID1[ClinVar_submission_gene,RSG_gene]	.	NG_046861.1	Homo_sapiens
NC_000001.11	236038308	236039981	RefSeqFE_meiotic_recombination_region_GeneID:107546745	gene-overlapping,intronic	protein_coding_GeneID:4811_NID1[ClinVar_submission_gene,RSG_gene]	ENCODEcCRE,Ensembl104,dbSUPER	NG_046861.1	Homo_sapiens
NC_000001.11	236038336	236040337	RefSeqFE_meiotic_recombination_region_GeneID:107546745	gene-overlapping,intronic	protein_coding_GeneID:4811_NID1[ClinVar_submission_gene,RSG_gene]	ENCODEcCRE,Ensembl104,dbSUPER	NG_046861.1	Homo_sapiens
NC_000001.11	236038452	236040098	RefSeqFE_meiotic_recombination_region_GeneID:107546745	gene-overlapping,intronic	protein_coding_GeneID:4811_NID1[ClinVar_submission_gene,RSG_gene]	ENCODEcCRE,Ensembl104,dbSUPER	NG_046861.1	Homo_sapiens
NC_000001.11	236039404	236039405	RefSeqFE_sequence_alteration_GeneID:107546745	gene-overlapping,intronic	protein_coding_GeneID:4811_NID1[ClinVar_submission_gene,RSG_gene]	.	NG_046861.1	Homo_sapiens
NC_000001.11	236096117	236097975	RefSeqFE_meiotic_recombination_region_GeneID:107548103	intergenic_gene_5prime-distal	.	ENCODEcCRE,Ensembl104	NG_046870.1	Homo_sapiens
NC_000001.11	236096491	236097991	RefSeqFE_meiotic_recombination_region_GeneID:107548103	intergenic_gene_5prime-distal	.	ENCODEcCRE,Ensembl104	NG_046870.1	Homo_sapiens
NC_000001.11	236096858	236097484	RefSeqFE_repeat_instability_region_GeneID:107548103	intergenic_gene_5prime-distal	.	ENCODEcCRE,Ensembl104	NG_046870.1	Homo_sapiens
NC_000001.11	236097054	236097055	RefSeqFE_sequence_alteration_GeneID:107548103	intergenic_gene_5prime-distal	.	ENCODEcCRE,Ensembl104	NG_046870.1	Homo_sapiens
NC_000001.11	236097055	236097068	RefSeqFE_nucleotide_motif_GeneID:107548103	intergenic_gene_5prime-distal	.	ENCODEcCRE,Ensembl104	NG_046870.1	Homo_sapiens
NC_000001.11	236097103	236097410	RefSeqFE_minisatellite_GeneID:107548103	intergenic_gene_5prime-distal	.	ENCODEcCRE,Ensembl104	NG_046870.1	Homo_sapiens
NC_000001.11	236097228	236097523	RefSeqFE_enhancer_GeneID:112577560	intergenic_gene_5prime-distal	.	ENCODEcCRE	NG_060477.1	Homo_sapiens
NC_000001.11	236114613	236119357	RefSeqFE_meiotic_recombination_region_GeneID:107546778	intergenic_gene_5prime-distal	.	Ensembl104	NG_046867.1	Homo_sapiens
NC_000001.11	236116099	236116112	RefSeqFE_nucleotide_motif_GeneID:107546778	intergenic_gene_5prime-distal	.	.	NG_046867.1	Homo_sapiens
NC_000001.11	236117670	236117683	RefSeqFE_nucleotide_motif_GeneID:107546778	intergenic_gene_5prime-distal	.	Ensembl104	NG_046867.1	Homo_sapiens
NC_000001.11	236117956	236119156	RefSeqFE_meiotic_recombination_region_GeneID:107546778	intergenic_gene_5prime-distal	.	.	NG_046867.1	Homo_sapiens
NC_000001.11	236118348	236118361	RefSeqFE_nucleotide_motif_GeneID:107546778	intergenic_gene_5prime-distal	.	.	NG_046867.1	Homo_sapiens
NC_000001.11	236118748	236119550	RefSeqFE_meiotic_recombination_region_GeneID:107546778	intergenic_gene_5prime-distal	.	.	NG_046867.1	Homo_sapiens
NC_000001.11	236118806	236118819	RefSeqFE_nucleotide_motif_GeneID:107546778	intergenic_gene_5prime-distal	.	.	NG_046867.1	Homo_sapiens
NC_000001.11	236119598	236122208	RefSeqFE_meiotic_recombination_region_GeneID:107546778	intergenic_gene_5prime-distal	.	ENCODEcCRE,FANTOM5	NG_046867.1	Homo_sapiens
NC_000001.11	236120252	236120265	RefSeqFE_nucleotide_motif_GeneID:107546778	intergenic_gene_5prime-distal	.	.	NG_046867.1	Homo_sapiens
NC_000001.11	236120928	236120944	RefSeqFE_nucleotide_motif_GeneID:107546778	intergenic_gene_5prime-distal	.	ENCODEcCRE,FANTOM5	NG_046867.1	Homo_sapiens
NC_000001.11	236120938	236120951	RefSeqFE_nucleotide_motif_GeneID:107546778	intergenic_gene_5prime-distal	.	ENCODEcCRE,FANTOM5	NG_046867.1	Homo_sapiens
NC_000001.11	236121039	236121052	RefSeqFE_nucleotide_motif_GeneID:107546778	intergenic_gene_5prime-distal	.	FANTOM5	NG_046867.1	Homo_sapiens
NC_000001.11	236121172	236121185	RefSeqFE_nucleotide_motif_GeneID:107546778	intergenic_gene_5prime-distal	.	.	NG_046867.1	Homo_sapiens
NC_000001.11	236121373	236121386	RefSeqFE_nucleotide_motif_GeneID:107546778	intergenic_gene_5prime-distal	.	.	NG_046867.1	Homo_sapiens
NC_000001.11	236121476	236121489	RefSeqFE_nucleotide_motif_GeneID:107546778	intergenic_gene_5prime-distal	.	.	NG_046867.1	Homo_sapiens
NC_000001.11	236121702	236121715	RefSeqFE_nucleotide_motif_GeneID:107546778	intergenic_gene_5prime-distal	.	.	NG_046867.1	Homo_sapiens
NC_000001.11	236121797	236121810	RefSeqFE_nucleotide_motif_GeneID:107546778	intergenic_gene_5prime-distal	.	.	NG_046867.1	Homo_sapiens
NC_000001.11	236121837	236121850	RefSeqFE_nucleotide_motif_GeneID:107546778	intergenic_gene_5prime-distal	.	.	NG_046867.1	Homo_sapiens
NC_000001.11	236128592	236129560	RefSeqFE_meiotic_recombination_region_GeneID:107546780	intergenic_gene_5prime-distal	.	ENCODEcCRE,Ensembl104	NG_046868.1	Homo_sapiens
NC_000001.11	236128820	236130120	RefSeqFE_meiotic_recombination_region_GeneID:107546780	intergenic_gene_5prime-distal	.	ENCODEcCRE,Ensembl104	NG_046868.1	Homo_sapiens
NC_000001.11	236503168	236503463	RefSeqFE_enhancer_GeneID:112577561	intergenic_gene_5prime-distal	.	ENCODEcCRE,dbSUPER	NG_060478.1	Homo_sapiens
NC_000001.11	236639530	236640088	RefSeqFE_enhancer_GeneID:108004528	intergenic_gene_5prime-distal	.	ENCODEcCRE,VISTA	NG_050853.1	Homo_sapiens
NC_000001.11	236688082	236690415	RefSeqFE_enhancer_GeneID:110121264	gene-overlapping,intronic	protein_coding_GeneID:88_ACTN2[ClinVar_submission_gene,RSG_gene]	ENCODEcCRE,Ensembl104,FANTOM5,VISTA,dbSUPER	NG_053879.1	Homo_sapiens
NC_000001.11	236997311	237000217	RefSeqFE_enhancer_GeneID:110121265	gene-overlapping,intronic	lncRNA_GeneID:107985368_LOC107985368	ENCODEcCRE,Ensembl104,VISTA,dbSUPER	NG_053880.1	Homo_sapiens
NC_000001.11	237011217	237013545	RefSeqFE_enhancer_GeneID:110121266	intergenic_gene_5prime-distal	.	ENCODEcCRE,Ensembl104,VISTA,dbSUPER	NG_053881.1	Homo_sapiens
NC_000001.11	241191908	241192203	RefSeqFE_enhancer_GeneID:112577565	gene-overlapping,intronic	protein_coding_GeneID:6000_RGS7	ENCODEcCRE,Ensembl104	NG_060481.1	Homo_sapiens
NC_000001.11	241806920	241807276	RefSeqFE_transcriptional_cis_regulatory_region_GeneID:115804253	intergenic_gene_5prime-distal	.	ENCODEcCRE,Ensembl104	NG_066136.1	Homo_sapiens
NC_000001.11	243713164	243714591	RefSeqFE_enhancer_GeneID:110120698	gene-overlapping,intronic	protein_coding_GeneID:10000_AKT3[ClinVar_submission_gene,LRG_gene,RSG_gene]	ENCODEcCRE,Ensembl104,VISTA,dbSUPER	NG_053324.1	Homo_sapiens
NC_000001.11	243939246	243939541	RefSeqFE_enhancer_GeneID:112577566	gene-overlapping,intronic	lncRNA_GeneID:339529_LINC02774	ENCODEcCRE,Ensembl104	NG_060482.1	Homo_sapiens
NC_000001.11	244341686	244341981	RefSeqFE_enhancer_GeneID:111828504	intergenic_gene_5prime-distal	.	ENCODEcCRE,Ensembl104,FANTOM5,dbSUPER	NG_056232.1	Homo_sapiens
NC_000001.11	246305948	246308048	RefSeqFE_enhancer_GeneID:110121251	gene-overlapping,intronic	protein_coding_GeneID:64754_SMYD3	ENCODEcCRE,Ensembl104,VISTA	NG_053866.1	Homo_sapiens
NC_000001.11	246978846	246979141	RefSeqFE_enhancer_GeneID:112577567	gene-overlapping,intronic	lncRNA_GeneID:100533111_ZNF670-ZNF695,protein_coding_GeneID:57116_ZNF695	.	NG_060483.1	Homo_sapiens
NC_000001.11	247104306	247104601	RefSeqFE_enhancer_GeneID:112577568	UTR-overlapping,exon-overlapping,gene-overlapping	lncRNA_GeneID:400812_FLJ39095,protein_coding_GeneID:79862_ZNF669	ENCODEcCRE,Ensembl104	NG_060484.1	Homo_sapiens
NC_000001.11	247331746	247332041	RefSeqFE_enhancer_GeneID:112577569	UTR-overlapping,exon-overlapping,gene-overlapping	protein_coding_GeneID:84838_ZNF496	ENCODEcCRE,Ensembl104,dbSUPER	NG_060485.1	Homo_sapiens
NC_000001.11	247855099	247855664	RefSeqFE_transcriptional_cis_regulatory_region_GeneID:115804254	intergenic_gene_5prime-proximal	.	ENCODEcCRE,Ensembl104,FANTOM5	NG_066137.1	Homo_sapiens
NC_000001.11	248884983	248885196	RefSeqFE_transcriptional_cis_regulatory_region_GeneID:115804255	gene-overlapping,intronic	protein_coding_GeneID:267002_PGBD2	ENCODEcCRE,Ensembl104,dbSUPER	NG_066138.1	Homo_sapiens
NC_000001.11	248889418	248889875	RefSeqFE_transcriptional_cis_regulatory_region_GeneID:115804256	gene-overlapping,intronic	protein_coding_GeneID:267002_PGBD2	ENCODEcCRE,Ensembl104,dbSUPER	NG_066139.1	Homo_sapiens
NC_000002.12	3252097	3252392	RefSeqFE_silencer_GeneID:114004371	gene-overlapping,intronic	protein_coding_GeneID:7260_EIPR1	.	NG_063791.1	Homo_sapiens
NC_000002.12	3264424	3267078	RefSeqFE_enhancer_GeneID:110121085	gene-overlapping,intronic	protein_coding_GeneID:7260_EIPR1	ENCODEcCRE,Ensembl104,FANTOM5,VISTA	NG_053705.1	Homo_sapiens
NC_000002.12	5409484	5412892	RefSeqFE_enhancer_GeneID:110121127	intergenic_gene_5prime-distal	.	ENCODEcCRE,VISTA	NG_053746.1	Homo_sapiens
NC_000002.12	7037757	7038052	RefSeqFE_enhancer_GeneID:111811968	gene-overlapping,intronic	protein_coding_GeneID:9781_RNF144A	ENCODEcCRE,Ensembl104,dbSUPER	NG_056200.1	Homo_sapiens
NC_000002.12	7634261	7634939	RefSeqFE_enhancer_GeneID:110120665	intergenic_gene_5prime-distal	.	ENCODEcCRE,VISTA	NG_053291.1	Homo_sapiens
NC_000002.12	8525029	8526751	RefSeqFE_transcriptional_cis_regulatory_region_GeneID:115804257	intergenic_gene_5prime-distal	.	ENCODEcCRE,Ensembl104,dbSUPER	NG_066140.1	Homo_sapiens
NC_000002.12	8534650	8535653	RefSeqFE_transcriptional_cis_regulatory_region_GeneID:115804258	intergenic_gene_5prime-distal	.	ENCODEcCRE,Ensembl104,FANTOM5,dbSUPER	NG_066141.1	Homo_sapiens
NC_000002.12	8535675	8537868	RefSeqFE_transcriptional_cis_regulatory_region_GeneID:115804259	intergenic_gene_5prime-distal	.	ENCODEcCRE,Ensembl104,FANTOM5,dbSUPER	NG_066142.1	Homo_sapiens
NC_000002.12	8544958	8545253	RefSeqFE_enhancer_GeneID:112841600	intergenic_gene_5prime-distal	.	ENCODEcCRE,Ensembl104,dbSUPER	NG_061333.1	Homo_sapiens
NC_000002.12	8544958	8545253	RefSeqFE_silencer_GeneID:112841600	intergenic_gene_5prime-distal	.	ENCODEcCRE,Ensembl104,dbSUPER	NG_061333.1	Homo_sapiens
NC_000002.12	8641263	8643461	RefSeqFE_enhancer_GeneID:110121131	gene-overlapping,intronic	lncRNA_GeneID:105373411_LOC105373411	ENCODEcCRE,Ensembl104,VISTA	NG_053750.1	Homo_sapiens
NC_000002.12	9365179	9365474	RefSeqFE_enhancer_GeneID:112841604	gene-overlapping,intronic	protein_coding_GeneID:8853_ASAP2	ENCODEcCRE,Ensembl104,dbSUPER	NG_061337.1	Homo_sapiens
NC_000002.12	9763659	9763954	RefSeqFE_enhancer_GeneID:112841605	gene-overlapping,intronic	lncRNA_GeneID:100996549_LOC100996549	ENCODEcCRE,Ensembl104,dbSUPER	NG_061338.1	Homo_sapiens
NC_000002.12	10297811	10298424	RefSeqFE_transcriptional_cis_regulatory_region_GeneID:115804260	gene-overlapping,intronic	lncRNA_GeneID:101929691_LOC101929691	ENCODEcCRE,dbSUPER	NG_066143.1	Homo_sapiens
NC_000002.12	12006902	12007197	RefSeqFE_enhancer_GeneID:112806042	UTR-overlapping,exon-overlapping,gene-overlapping	lncRNA_GeneID:100506457_MIR3681HG	ENCODEcCRE,Ensembl104,dbSUPER	NG_060898.1	Homo_sapiens
NC_000002.12	12277655	12277800	RefSeqFE_enhancer_GeneID:111556161	gene-overlapping,intronic	lncRNA_GeneID:100506457_MIR3681HG	ENCODEcCRE,Ensembl104,FANTOM5,dbSUPER	NG_056063.1	Homo_sapiens
NC_000002.12	12277722	12277733	RefSeqFE_transcriptional_cis_regulatory_region_GeneID:111556161	gene-overlapping,intronic	lncRNA_GeneID:100506457_MIR3681HG	ENCODEcCRE,Ensembl104,FANTOM5,dbSUPER	NG_056063.1	Homo_sapiens
NC_000002.12	12705674	12706154	RefSeqFE_transcriptional_cis_regulatory_region_GeneID:115804261	intergenic_gene_5prime-distal	.	ENCODEcCRE,Ensembl104,dbSUPER	NG_066144.1	Homo_sapiens
NC_000002.12	19574353	19576457	RefSeqFE_enhancer_GeneID:110121045	intergenic_gene_5prime-distal	.	ENCODEcCRE,Ensembl104,VISTA	NG_053665.1	Homo_sapiens
NC_000002.12	20106807	20107102	RefSeqFE_enhancer_GeneID:112806072	gene-overlapping,intronic	lncRNA_GeneID:105373463_LAPTM4A-DT	ENCODEcCRE,Ensembl104,dbSUPER	NG_060925.1	Homo_sapiens
NC_000002.12	20578533	20580046	RefSeqFE_enhancer_GeneID:110121308	gene-overlapping,intronic	protein_coding_GeneID:64342_HS1BP3	ENCODEcCRE,FANTOM5,VISTA,dbSUPER	NG_053923.1	Homo_sapiens
NC_000002.12	21000400	21001352	RefSeqFE_insulator_GeneID:106632268	intergenic_gene_5prime-distal	.	.	NG_042877.1	Homo_sapiens
NC_000002.12	21000632	21001271	RefSeqFE_matrix_attachment_site_GeneID:106632268	intergenic_gene_5prime-distal	.	.	NG_042877.1	Homo_sapiens
NC_000002.12	21000680	21001281	RefSeqFE_DNAseI_hypersensitive_site_GeneID:106632268	intergenic_gene_5prime-distal	.	.	NG_042877.1	Homo_sapiens
NC_000002.12	21000695	21000709	RefSeqFE_repeat_region_GeneID:106632268	intergenic_gene_5prime-distal	.	.	NG_042877.1	Homo_sapiens
NC_000002.12	21000715	21000729	RefSeqFE_repeat_region_GeneID:106632268	intergenic_gene_5prime-distal	.	.	NG_042877.1	Homo_sapiens
NC_000002.12	21000738	21001243	RefSeqFE_repeat_region_GeneID:106632268	intergenic_gene_5prime-distal	.	.	NG_042877.1	Homo_sapiens
NC_000002.12	21001256	21001270	RefSeqFE_repeat_region_GeneID:106632268	intergenic_gene_5prime-distal	.	.	NG_042877.1	Homo_sapiens
NC_000002.12	21001440	21001841	RefSeqFE_DNAseI_hypersensitive_site_GeneID:106632268	CDS-overlapping,exon-overlapping,gene-overlapping	protein_coding_GeneID:338_APOB[ClinVar_submission_gene,RSG_gene]	.	NG_042877.1	Homo_sapiens
NC_000002.12	21041087	21043012	RefSeqFE_enhancer_GeneID:106560211	gene-overlapping,intronic	protein_coding_GeneID:338_APOB[ClinVar_submission_gene,RSG_gene]	ENCODEcCRE,Ensembl104	NG_042873.1	Homo_sapiens
NC_000002.12	21041139	21042040	RefSeqFE_regulatory_region_GeneID:106560211	gene-overlapping,intronic	protein_coding_GeneID:338_APOB[ClinVar_submission_gene,RSG_gene]	Ensembl104	NG_042873.1	Homo_sapiens
NC_000002.12	21041689	21041709	RefSeqFE_protein_binding_site_HNF1_homeobox_A_GeneID:106560211	gene-overlapping,intronic	protein_coding_GeneID:338_APOB[ClinVar_submission_gene,RSG_gene]	Ensembl104	NG_042873.1	Homo_sapiens
NC_000002.12	21041689	21041709	RefSeqFE_silencer_GeneID:106560211	gene-overlapping,intronic	protein_coding_GeneID:338_APOB[ClinVar_submission_gene,RSG_gene]	Ensembl104	NG_042873.1	Homo_sapiens
NC_000002.12	21041944	21043338	RefSeqFE_DNAseI_hypersensitive_site_GeneID:106560211	gene-overlapping,intronic	protein_coding_GeneID:338_APOB[ClinVar_submission_gene,RSG_gene]	ENCODEcCRE,Ensembl104,FANTOM5	NG_042873.1	Homo_sapiens
NC_000002.12	21042045	21042528	RefSeqFE_enhancer_GeneID:106560211	CDS-overlapping,exon-overlapping,gene-overlapping	protein_coding_GeneID:338_APOB[ClinVar_submission_gene,RSG_gene]	ENCODEcCRE,Ensembl104	NG_042873.1	Homo_sapiens
NC_000002.12	21042090	21042114	RefSeqFE_protein_binding_site_caudal_type_homeobox_2_and_4_GeneID:106560211	gene-overlapping,intronic	protein_coding_GeneID:338_APOB[ClinVar_submission_gene,RSG_gene]	ENCODEcCRE,Ensembl104	NG_042873.1	Homo_sapiens
NC_000002.12	21042090	21042114	RefSeqFE_silencer_GeneID:106560211	gene-overlapping,intronic	protein_coding_GeneID:338_APOB[ClinVar_submission_gene,RSG_gene]	ENCODEcCRE,Ensembl104	NG_042873.1	Homo_sapiens
NC_000002.12	21042109	21042267	RefSeqFE_enhancer_GeneID:106560211	gene-overlapping,intronic	protein_coding_GeneID:338_APOB[ClinVar_submission_gene,RSG_gene]	ENCODEcCRE,Ensembl104	NG_042873.1	Homo_sapiens
NC_000002.12	21043006	21043455	RefSeqFE_enhancer_GeneID:106560211	gene-overlapping,intronic	protein_coding_GeneID:338_APOB[ClinVar_submission_gene,RSG_gene]	ENCODEcCRE,Ensembl104,FANTOM5	NG_042873.1	Homo_sapiens
NC_000002.12	21043132	21043266	RefSeqFE_enhancer_GeneID:106560211	gene-overlapping,intronic	protein_coding_GeneID:338_APOB[ClinVar_submission_gene,RSG_gene]	ENCODEcCRE,Ensembl104,FANTOM5	NG_042873.1	Homo_sapiens
NC_000002.12	21043149	21043203	RefSeqFE_protein_binding_site_CCAAT/enhancer_binding_protein_(C/EBP)_GeneID:106560211	gene-overlapping,intronic	protein_coding_GeneID:338_APOB[ClinVar_submission_gene,RSG_gene]	ENCODEcCRE,Ensembl104,FANTOM5	NG_042873.1	Homo_sapiens
NC_000002.12	21043199	21043234	RefSeqFE_protein_binding_site_hepatocyte_nuclear_factor_1_forkhead_box_A1_GeneID:106560211	gene-overlapping,intronic	protein_coding_GeneID:338_APOB[ClinVar_submission_gene,RSG_gene]	ENCODEcCRE,Ensembl104,FANTOM5	NG_042873.1	Homo_sapiens
NC_000002.12	21043449	21043731	RefSeqFE_enhancer_GeneID:106560211	CDS-overlapping,exon-overlapping,gene-overlapping	protein_coding_GeneID:338_APOB[ClinVar_submission_gene,RSG_gene]	ENCODEcCRE,Ensembl104	NG_042873.1	Homo_sapiens
NC_000002.12	21043948	21044974	RefSeqFE_promoter_GeneID:106560211	UTR-overlapping,exon-overlapping,gene-overlapping	protein_coding_GeneID:338_APOB[ClinVar_submission_gene,RSG_gene]	ENCODEcCRE,Ensembl104	NG_042873.1	Homo_sapiens
NC_000002.12	21043951	21044078	RefSeqFE_transcriptional_cis_regulatory_region_GeneID:106560211	UTR-overlapping,exon-overlapping,gene-overlapping	protein_coding_GeneID:338_APOB[ClinVar_submission_gene,RSG_gene]	ENCODEcCRE,Ensembl104	NG_042873.1	Homo_sapiens
NC_000002.12	21044025	21044036	RefSeqFE_transcriptional_cis_regulatory_region_GeneID:106560211	UTR-overlapping,exon-overlapping,gene-overlapping	protein_coding_GeneID:338_APOB[ClinVar_submission_gene,RSG_gene]	ENCODEcCRE,Ensembl104	NG_042873.1	Homo_sapiens
NC_000002.12	21044033	21044064	RefSeqFE_protein_binding_site_topoisomerase_(DNA)_I_GeneID:106560211	UTR-overlapping,exon-overlapping,gene-overlapping	protein_coding_GeneID:338_APOB[ClinVar_submission_gene,RSG_gene]	ENCODEcCRE,Ensembl104	NG_042873.1	Homo_sapiens
NC_000002.12	21044038	21044059	RefSeqFE_transcriptional_cis_regulatory_region_GeneID:106560211	UTR-overlapping,exon-overlapping,gene-overlapping	protein_coding_GeneID:338_APOB[ClinVar_submission_gene,RSG_gene]	ENCODEcCRE,Ensembl104	NG_042873.1	Homo_sapiens
NC_000002.12	21044042	21045072	RefSeqFE_DNAseI_hypersensitive_site_GeneID:106560211	intergenic_gene_5prime-proximal	.	ENCODEcCRE,Ensembl104	NG_042873.1	Homo_sapiens
NC_000002.12	21044101	21044146	RefSeqFE_response_element_GeneID:106560211	intergenic_gene_5prime-proximal	.	ENCODEcCRE,Ensembl104	NG_042873.1	Homo_sapiens
NC_000002.12	21044104	21044125	RefSeqFE_protein_binding_site_CCAAT/enhancer_binding_protein_(C/EBP)_GeneID:106560211	intergenic_gene_5prime-proximal	.	ENCODEcCRE,Ensembl104	NG_042873.1	Homo_sapiens
NC_000002.12	21044124	21044144	RefSeqFE_protein_binding_site_CCAAT/enhancer_binding_protein_(C/EBP)_GeneID:106560211	intergenic_gene_5prime-proximal	.	ENCODEcCRE,Ensembl104	NG_042873.1	Homo_sapiens
NC_000002.12	21044131	21044157	RefSeqFE_protein_binding_site_hepatocyte_nuclear_factor_4_GeneID:106560211	intergenic_gene_5prime-proximal	.	ENCODEcCRE,Ensembl104	NG_042873.1	Homo_sapiens
NC_000002.12	21044133	21044158	RefSeqFE_protein_binding_site_nuclear_receptor_subfamily_2_group_F_members_1_2_6_GeneID:106560211	intergenic_gene_5prime-proximal	.	ENCODEcCRE,Ensembl104	NG_042873.1	Homo_sapiens
NC_000002.12	21044159	21044183	RefSeqFE_protein_binding_site_forkhead_box_A1_GeneID:106560211	intergenic_gene_5prime-proximal	.	ENCODEcCRE,Ensembl104	NG_042873.1	Homo_sapiens
NC_000002.12	21044169	21044190	RefSeqFE_protein_binding_site_CCAAT/enhancer_binding_protein_(C/EBP)_GeneID:106560211	intergenic_gene_5prime-proximal	.	ENCODEcCRE,Ensembl104	NG_042873.1	Homo_sapiens
NC_000002.12	21044184	21044213	RefSeqFE_protein_binding_site_CCAAT/enhancer_binding_protein_(C/EBP)_beta_and_delta_GeneID:106560211	intergenic_gene_5prime-proximal	.	ENCODEcCRE,Ensembl104	NG_042873.1	Homo_sapiens
NC_000002.12	21044498	21044523	RefSeqFE_silencer_GeneID:106560211	intergenic_gene_5prime-proximal	.	Ensembl104	NG_042873.1	Homo_sapiens
NC_000002.12	21044968	21046595	RefSeqFE_matrix_attachment_site_GeneID:106560211	intergenic_gene_5prime-proximal	.	ENCODEcCRE,Ensembl104	NG_042873.1	Homo_sapiens
NC_000002.12	21045868	21046205	RefSeqFE_silencer_GeneID:106560211	intergenic_gene_5prime-proximal	.	.	NG_042873.1	Homo_sapiens
NC_000002.12	21045868	21047291	RefSeqFE_silencer_GeneID:106560211	intergenic_gene_5prime-proximal	.	ENCODEcCRE	NG_042873.1	Homo_sapiens
NC_000002.12	21046543	21046815	RefSeqFE_silencer_GeneID:106560211	intergenic_gene_5prime-distal	.	ENCODEcCRE	NG_042873.1	Homo_sapiens
NC_000002.12	21046809	21047144	RefSeqFE_silencer_GeneID:106560211	intergenic_gene_5prime-distal	.	ENCODEcCRE	NG_042873.1	Homo_sapiens
NC_000002.12	21046854	21046877	RefSeqFE_protein_binding_site_nuclear_receptor_subfamily_2_group_F_member_2_GeneID:106560211	intergenic_gene_5prime-distal	.	.	NG_042873.1	Homo_sapiens
NC_000002.12	21046854	21046877	RefSeqFE_silencer_GeneID:106560211	intergenic_gene_5prime-distal	.	.	NG_042873.1	Homo_sapiens
NC_000002.12	21048314	21049341	RefSeqFE_insulator_GeneID:106560211	intergenic_gene_5prime-distal	.	.	NG_042873.1	Homo_sapiens
NC_000002.12	21048437	21049341	RefSeqFE_matrix_attachment_site_GeneID:106560211	intergenic_gene_5prime-distal	.	.	NG_042873.1	Homo_sapiens
NC_000002.12	21094584	21094755	RefSeqFE_silencer_GeneID:106633812	intergenic_gene_5prime-distal	.	.	NG_042891.1	Homo_sapiens
NC_000002.12	21094584	21097325	RefSeqFE_enhancer_GeneID:106633812	intergenic_gene_5prime-distal	.	ENCODEcCRE,Ensembl104	NG_042891.1	Homo_sapiens
NC_000002.12	21094749	21095110	RefSeqFE_enhancer_GeneID:106633812	intergenic_gene_5prime-distal	.	.	NG_042891.1	Homo_sapiens
NC_000002.12	21095104	21096144	RefSeqFE_DNAseI_hypersensitive_site_GeneID:106633812	intergenic_gene_5prime-distal	.	.	NG_042891.1	Homo_sapiens
NC_000002.12	21095104	21096144	RefSeqFE_enhancer_GeneID:106633812	intergenic_gene_5prime-distal	.	.	NG_042891.1	Homo_sapiens
NC_000002.12	21097099	21098100	RefSeqFE_DNAseI_hypersensitive_site_GeneID:106633812	intergenic_gene_5prime-distal	.	ENCODEcCRE,Ensembl104	NG_042891.1	Homo_sapiens
NC_000002.12	21097319	21097640	RefSeqFE_enhancer_GeneID:106633812	intergenic_gene_5prime-distal	.	ENCODEcCRE	NG_042891.1	Homo_sapiens
NC_000002.12	21097406	21097430	RefSeqFE_protein_binding_site_CCAAT/enhancer_binding_protein_(C/EBP)_alpha_and_beta_GeneID:106633812	intergenic_gene_5prime-distal	.	ENCODEcCRE	NG_042891.1	Homo_sapiens
NC_000002.12	21097434	21097456	RefSeqFE_protein_binding_site_hepatocyte_nuclear_factor_4_alpha_GeneID:106633812	intergenic_gene_5prime-distal	.	ENCODEcCRE	NG_042891.1	Homo_sapiens
NC_000002.12	21097520	21097546	RefSeqFE_protein_binding_site_CCAAT/enhancer_binding_protein_(C/EBP)_alpha_and_beta_GeneID:106633812	intergenic_gene_5prime-distal	.	ENCODEcCRE	NG_042891.1	Homo_sapiens
NC_000002.12	21097563	21097583	RefSeqFE_protein_binding_site_forkhead_box_A2_GeneID:106633812	intergenic_gene_5prime-distal	.	ENCODEcCRE	NG_042891.1	Homo_sapiens
NC_000002.12	21097634	21098125	RefSeqFE_enhancer_GeneID:106633812	intergenic_gene_5prime-distal	.	ENCODEcCRE,Ensembl104	NG_042891.1	Homo_sapiens
NC_000002.12	21097634	21099233	RefSeqFE_enhancer_GeneID:106633812	intergenic_gene_5prime-distal	.	ENCODEcCRE,Ensembl104	NG_042891.1	Homo_sapiens
NC_000002.12	21097634	21099233	RefSeqFE_enhancer_blocking_element_GeneID:106633812	intergenic_gene_5prime-distal	.	ENCODEcCRE,Ensembl104	NG_042891.1	Homo_sapiens
NC_000002.12	21097634	21099233	RefSeqFE_insulator_GeneID:106633812	intergenic_gene_5prime-distal	.	ENCODEcCRE,Ensembl104	NG_042891.1	Homo_sapiens
NC_000002.12	21097816	21097840	RefSeqFE_protein_binding_site_nuclear_receptor_subfamily_2_group_F_member_2_hepatocyte_nuclear_factor_4_alpha_GeneID:106633812	intergenic_gene_5prime-distal	.	Ensembl104	NG_042891.1	Homo_sapiens
NC_000002.12	21098059	21098091	RefSeqFE_enhancer_blocking_element_GeneID:106633812	intergenic_gene_5prime-distal	.	Ensembl104	NG_042891.1	Homo_sapiens
NC_000002.12	21098059	21098091	RefSeqFE_protein_binding_site_CCCTC-binding_factor_(zinc_finger_protein)_GeneID:106633812	intergenic_gene_5prime-distal	.	Ensembl104	NG_042891.1	Homo_sapiens
NC_000002.12	21100460	21101784	RefSeqFE_matrix_attachment_site_GeneID:106633812	intergenic_gene_5prime-distal	.	ENCODEcCRE	NG_042891.1	Homo_sapiens
NC_000002.12	23127457	23127752	RefSeqFE_enhancer_GeneID:112840907	gene-overlapping,intronic	protein_coding_GeneID:107985792_LOC107985792	ENCODEcCRE	NG_060942.1	Homo_sapiens
NC_000002.12	24399459	24399754	RefSeqFE_enhancer_GeneID:112840916	intergenic_gene_5prime-distal	.	ENCODEcCRE,Ensembl104	NG_060951.1	Homo_sapiens
NC_000002.12	24457757	24458115	RefSeqFE_transcriptional_cis_regulatory_region_GeneID:115945147	gene-overlapping,intronic	lncRNA_GeneID:105374329_LOC105374329	ENCODEcCRE	NG_066548.1	Homo_sapiens
NC_000002.12	24482699	24482994	RefSeqFE_enhancer_GeneID:112840917	intergenic_gene_5prime-distal	.	ENCODEcCRE,Ensembl104,FANTOM5	NG_060952.1	Homo_sapiens
NC_000002.12	25105719	25106014	RefSeqFE_silencer_GeneID:114004370	gene-overlapping,intronic	protein_coding_GeneID:22979_EFR3B	ENCODEcCRE,Ensembl104	NG_063789.1	Homo_sapiens
NC_000002.12	25168453	25169266	RefSeqFE_promoter_GeneID:108167315	UTR-overlapping,exon-overlapping,gene-overlapping	protein_coding_GeneID:5443_POMC[ClinVar_submission_gene,RSG_gene]	ENCODEcCRE,Ensembl104	NG_050903.1	Homo_sapiens
NC_000002.12	25168604	25168611	RefSeqFE_TATA_box_GeneID:108167315	intergenic_gene_5prime-proximal	.	Ensembl104	NG_050903.1	Homo_sapiens
NC_000002.12	25168604	25168617	RefSeqFE_transcriptional_cis_regulatory_region_GeneID:108167315	intergenic_gene_5prime-proximal	.	Ensembl104	NG_050903.1	Homo_sapiens
NC_000002.12	25168632	25168657	RefSeqFE_protein_binding_site_nuclear_receptor_subfamily_4_group_A_member_1_GeneID:108167315	intergenic_gene_5prime-proximal	.	Ensembl104	NG_050903.1	Homo_sapiens
NC_000002.12	25168632	25168661	RefSeqFE_protein_binding_site_nuclear_receptor_subfamily_3_group_C_member_1_GeneID:108167315	intergenic_gene_5prime-proximal	.	Ensembl104	NG_050903.1	Homo_sapiens
NC_000002.12	25168666	25168699	RefSeqFE_protein_binding_site_Jun_proto-oncogene_AP-1_transcription_factor_subunit_GeneID:108167315	intergenic_gene_5prime-proximal	.	ENCODEcCRE,Ensembl104	NG_050903.1	Homo_sapiens
NC_000002.12	25168676	25168696	RefSeqFE_enhancer_GeneID:108167315	intergenic_gene_5prime-proximal	.	ENCODEcCRE,Ensembl104	NG_050903.1	Homo_sapiens
NC_000002.12	25168682	25168856	RefSeqFE_transcriptional_cis_regulatory_region_GeneID:108167315	intergenic_gene_5prime-proximal	.	ENCODEcCRE,Ensembl104	NG_050903.1	Homo_sapiens
NC_000002.12	25168779	25168802	RefSeqFE_protein_binding_site_upstream_transcription_factor_1_GeneID:108167315	intergenic_gene_5prime-proximal	.	ENCODEcCRE,Ensembl104	NG_050903.1	Homo_sapiens
NC_000002.12	25168856	25168882	RefSeqFE_transcriptional_cis_regulatory_region_GeneID:108167315	intergenic_gene_5prime-proximal	.	ENCODEcCRE,Ensembl104	NG_050903.1	Homo_sapiens
NC_000002.12	25168903	25168929	RefSeqFE_protein_binding_site_cAMP_responsive_element_binding_protein_1_GeneID:108167315	intergenic_gene_5prime-proximal	.	ENCODEcCRE,Ensembl104	NG_050903.1	Homo_sapiens
NC_000002.12	25168957	25168986	RefSeqFE_protein_binding_site_E2F_transcription_factor_4_transcription_factor_Dp-1_GeneID:108167315	intergenic_gene_5prime-proximal	.	ENCODEcCRE,Ensembl104	NG_050903.1	Homo_sapiens
NC_000002.12	25176930	25179686	RefSeqFE_enhancer_GeneID:106728414	intergenic_gene_5prime-distal	.	ENCODEcCRE,Ensembl104	NG_044976.1	Homo_sapiens
NC_000002.12	25177360	25177534	RefSeqFE_conserved_region_GeneID:106728414	intergenic_gene_5prime-distal	.	Ensembl104	NG_044976.1	Homo_sapiens
NC_000002.12	25178596	25179232	RefSeqFE_conserved_region_GeneID:106728414	intergenic_gene_5prime-distal	.	ENCODEcCRE	NG_044976.1	Homo_sapiens
NC_000002.12	25178912	25179066	RefSeqFE_conserved_region_GeneID:106728414	intergenic_gene_5prime-distal	.	ENCODEcCRE	NG_044976.1	Homo_sapiens
NC_000002.12	26463620	26463915	RefSeqFE_enhancer_GeneID:112840921	gene-overlapping,intronic	protein_coding_GeneID:9381_OTOF[ClinVar_submission_gene,RSG_gene]	ENCODEcCRE,Ensembl104	NG_060956.1	Homo_sapiens
NC_000002.12	27321081	27321376	RefSeqFE_enhancer_GeneID:111828513	gene-overlapping,intronic	protein_coding_GeneID:4358_MPV17[ClinVar_submission_gene,RSG_gene]	ENCODEcCRE,Ensembl104,dbSUPER	NG_056241.1	Homo_sapiens
NC_000002.12	27321101	27321396	RefSeqFE_enhancer_GeneID:111828513	gene-overlapping,intronic	protein_coding_GeneID:4358_MPV17[ClinVar_submission_gene,RSG_gene]	ENCODEcCRE,Ensembl104,dbSUPER	NG_056241.1	Homo_sapiens
NC_000002.12	27537381	27537676	RefSeqFE_enhancer_GeneID:112840922	intergenic_gene_5prime-distal	.	ENCODEcCRE,Ensembl104	NG_060957.1	Homo_sapiens
NC_000002.12	28596761	28597056	RefSeqFE_enhancer_GeneID:112840923	gene-overlapping,intronic	protein_coding_GeneID:151056_PLB1[ClinVar_submission_gene,RSG_gene]	ENCODEcCRE,dbSUPER	NG_060958.1	Homo_sapiens
NC_000002.12	29108111	29108699	RefSeqFE_enhancer_GeneID:108281152	gene-overlapping,intronic	protein_coding_GeneID:79745_CLIP4	ENCODEcCRE,Ensembl104,FANTOM5,dbSUPER	NG_051112.1	Homo_sapiens
NC_000002.12	29108355	29108563	RefSeqFE_CAGE_cluster_GeneID:108281152	gene-overlapping,intronic	protein_coding_GeneID:79745_CLIP4	ENCODEcCRE,Ensembl104,FANTOM5,dbSUPER	NG_051112.1	Homo_sapiens
NC_000002.12	32865561	32865856	RefSeqFE_enhancer_GeneID:112840924	gene-overlapping,intronic	lncRNA_GeneID:285045_LINC00486	ENCODEcCRE	NG_060959.1	Homo_sapiens
NC_000002.12	33015441	33015736	RefSeqFE_enhancer_GeneID:112840925	gene-overlapping,intronic	protein_coding_GeneID:4052_LTBP1	ENCODEcCRE,Ensembl104	NG_060960.1	Homo_sapiens
NC_000002.12	33678501	33678796	RefSeqFE_enhancer_GeneID:112840926	intergenic_gene_5prime-distal	.	Ensembl104	NG_060961.1	Homo_sapiens
NC_000002.12	36333736	36337465	RefSeqFE_meiotic_recombination_region_GeneID:107457596	intergenic_gene_5prime-distal	.	ENCODEcCRE,Ensembl104,dbSUPER	NG_046837.1	Homo_sapiens
NC_000002.12	36335145	36336236	RefSeqFE_meiotic_recombination_region_GeneID:107457596	intergenic_gene_5prime-distal	.	dbSUPER	NG_046837.1	Homo_sapiens
NC_000002.12	36335336	36336836	RefSeqFE_meiotic_recombination_region_GeneID:107457596	intergenic_gene_5prime-distal	.	dbSUPER	NG_046837.1	Homo_sapiens
NC_000002.12	36335417	36336876	RefSeqFE_meiotic_recombination_region_GeneID:107457596	intergenic_gene_5prime-distal	.	dbSUPER	NG_046837.1	Homo_sapiens
NC_000002.12	36336011	36336024	RefSeqFE_nucleotide_motif_GeneID:107457596	intergenic_gene_5prime-distal	.	dbSUPER	NG_046837.1	Homo_sapiens
NC_000002.12	36336015	36336028	RefSeqFE_nucleotide_motif_GeneID:107457596	intergenic_gene_5prime-distal	.	dbSUPER	NG_046837.1	Homo_sapiens
NC_000002.12	36659985	36660280	RefSeqFE_enhancer_GeneID:112840927	intergenic_gene_5prime-distal	.	ENCODEcCRE,Ensembl104	NG_060962.1	Homo_sapiens
NC_000002.12	37416726	37418317	RefSeqFE_enhancer_GeneID:110121122	intergenic_gene_5prime-distal	.	ENCODEcCRE,Ensembl104,VISTA	NG_053741.1	Homo_sapiens
NC_000002.12	37561516	37562113	RefSeqFE_transcriptional_cis_regulatory_region_GeneID:115945149	gene-overlapping,intronic	lncRNA_GeneID:105374464_LOC105374464	ENCODEcCRE,FANTOM5,dbSUPER	NG_066549.1	Homo_sapiens
NC_000002.12	37562270	37562629	RefSeqFE_transcriptional_cis_regulatory_region_GeneID:115945150	gene-overlapping,intronic	lncRNA_GeneID:105374464_LOC105374464	ENCODEcCRE,FANTOM5,dbSUPER	NG_066550.1	Homo_sapiens
NC_000002.12	38076131	38077507	RefSeqFE_promoter_GeneID:110599580	intergenic_gene_5prime-proximal	.	ENCODEcCRE,Ensembl104,dbSUPER	NG_055444.1	Homo_sapiens
NC_000002.12	38076145	38076153	RefSeqFE_transcriptional_cis_regulatory_region_GeneID:110599580	UTR-overlapping,exon-overlapping,gene-overlapping	protein_coding_GeneID:1545_CYP1B1[ClinVar_submission_gene,RSG_gene]	ENCODEcCRE,Ensembl104,dbSUPER	NG_055444.1	Homo_sapiens
NC_000002.12	38076177	38076183	RefSeqFE_TATA_box_GeneID:110599580	intergenic_gene_5prime-proximal	.	ENCODEcCRE,Ensembl104,dbSUPER	NG_055444.1	Homo_sapiens
NC_000002.12	38076189	38076219	RefSeqFE_protein_binding_site_estrogen_receptor_1_GeneID:110599580	intergenic_gene_5prime-proximal	.	ENCODEcCRE,Ensembl104,dbSUPER	NG_055444.1	Homo_sapiens
NC_000002.12	38076968	38076994	RefSeqFE_protein_binding_site_Sp1_transcription_factor_GeneID:110599580	intergenic_gene_5prime-proximal	.	ENCODEcCRE,Ensembl104,dbSUPER	NG_055444.1	Homo_sapiens
NC_000002.12	38076973	38077172	RefSeqFE_enhancer_GeneID:110599580	intergenic_gene_5prime-proximal	.	ENCODEcCRE,Ensembl104,dbSUPER	NG_055444.1	Homo_sapiens
NC_000002.12	38076988	38077024	RefSeqFE_protein_binding_site_aryl_hydrocarbon_receptor_GeneID:110599580	intergenic_gene_5prime-proximal	.	ENCODEcCRE,Ensembl104,dbSUPER	NG_055444.1	Homo_sapiens
NC_000002.12	38077073	38077103	RefSeqFE_transcriptional_cis_regulatory_region_GeneID:110599580	intergenic_gene_5prime-proximal	.	ENCODEcCRE,Ensembl104,dbSUPER	NG_055444.1	Homo_sapiens
NC_000002.12	38077160	38077190	RefSeqFE_protein_binding_site_aryl_hydrocarbon_receptor_GeneID:110599580	intergenic_gene_5prime-proximal	.	ENCODEcCRE,Ensembl104,dbSUPER	NG_055444.1	Homo_sapiens
NC_000002.12	38077626	38077656	RefSeqFE_protein_binding_site_aryl_hydrocarbon_receptor_GeneID:110599580	intergenic_gene_5prime-proximal	.	ENCODEcCRE,Ensembl104,dbSUPER	NG_055444.1	Homo_sapiens
NC_000002.12	38077810	38077840	RefSeqFE_protein_binding_site_Sp1_transcription_factor_GeneID:110599580	intergenic_gene_5prime-proximal	.	Ensembl104,dbSUPER	NG_055444.1	Homo_sapiens
NC_000002.12	38436246	38436541	RefSeqFE_enhancer_GeneID:112840929	intergenic_gene_5prime-distal	.	ENCODEcCRE,Ensembl104,dbSUPER	NG_060964.1	Homo_sapiens
NC_000002.12	38643688	38644201	RefSeqFE_transcriptional_cis_regulatory_region_GeneID:115945151	intergenic_gene_5prime-distal	.	ENCODEcCRE,Ensembl104,dbSUPER	NG_066551.1	Homo_sapiens
NC_000002.12	38654142	38654816	RefSeqFE_transcriptional_cis_regulatory_region_GeneID:115945152	intergenic_gene_5prime-distal	.	ENCODEcCRE,Ensembl104,dbSUPER	NG_066552.1	Homo_sapiens
NC_000002.12	38827686	38827981	RefSeqFE_enhancer_GeneID:112840930	gene-overlapping,intronic	protein_coding_GeneID:90957_DHX57	ENCODEcCRE	NG_060965.1	Homo_sapiens
NC_000002.12	39141875	39142328	RefSeqFE_transcriptional_cis_regulatory_region_GeneID:115945153	intergenic_gene_5prime-distal	.	ENCODEcCRE,Ensembl104,FANTOM5,dbSUPER	NG_066553.1	Homo_sapiens
NC_000002.12	39150110	39150496	RefSeqFE_transcriptional_cis_regulatory_region_GeneID:115945154	intergenic_gene_5prime-distal	.	ENCODEcCRE,Ensembl104,dbSUPER	NG_066554.1	Homo_sapiens
NC_000002.12	39181407	39181702	RefSeqFE_enhancer_GeneID:112840931	gene-overlapping,intronic	protein_coding_GeneID:344387_CDKL4	ENCODEcCRE	NG_060966.1	Homo_sapiens
NC_000002.12	41962882	41968660	RefSeqFE_enhancer_GeneID:114827839	intergenic_gene_5prime-distal	.	ENCODEcCRE,Ensembl104,FANTOM5,VISTA,dbSUPER	NG_065195.1	Homo_sapiens
NC_000002.12	42195638	42195783	RefSeqFE_enhancer_GeneID:111465020	gene-overlapping,intronic	protein_coding_GeneID:27436_EML4	ENCODEcCRE	NG_055924.1	Homo_sapiens
NC_000002.12	42195704	42195718	RefSeqFE_transcriptional_cis_regulatory_region_GeneID:111465020	gene-overlapping,intronic	protein_coding_GeneID:27436_EML4	ENCODEcCRE	NG_055924.1	Homo_sapiens
NC_000002.12	42674048	42674343	RefSeqFE_enhancer_GeneID:112840932	gene-overlapping,intronic	protein_coding_GeneID:57504_MTA3[ClinVar_submission_gene]	Ensembl104	NG_060967.1	Homo_sapiens
NC_000002.12	42989345	42989519	RefSeqFE_transcriptional_cis_regulatory_region_GeneID:115945155	intergenic_gene_5prime-distal	.	dbSUPER	NG_066555.1	Homo_sapiens
NC_000002.12	43178624	43179481	RefSeqFE_transcriptional_cis_regulatory_region_GeneID:115945156	intergenic_gene_5prime-distal	.	ENCODEcCRE,FANTOM5,dbSUPER	NG_066556.1	Homo_sapiens
NC_000002.12	43190454	43191053	RefSeqFE_transcriptional_cis_regulatory_region_GeneID:115945157	intergenic_gene_5prime-distal	.	ENCODEcCRE,dbSUPER	NG_066557.1	Homo_sapiens
NC_000002.12	43217581	43220159	RefSeqFE_enhancer_GeneID:110121222	intergenic_gene_5prime-distal	.	ENCODEcCRE,Ensembl104,VISTA,dbSUPER	NG_053837.1	Homo_sapiens
NC_000002.12	43676369	43676664	RefSeqFE_enhancer_GeneID:112840935	UTR-overlapping,exon-overlapping,gene-overlapping	protein_coding_GeneID:130271_PLEKHH2,protein_coding_GeneID:728819_C1GALT1C1L	ENCODEcCRE,Ensembl104	NG_061302.1	Homo_sapiens
NC_000002.12	44803429	44805600	RefSeqFE_enhancer_GeneID:110120696	intergenic_gene_5prime-distal	.	ENCODEcCRE,Ensembl104,VISTA	NG_053322.1	Homo_sapiens
NC_000002.12	44879787	44880514	RefSeqFE_enhancer_GeneID:110120598	intergenic_gene_5prime-distal	.	ENCODEcCRE,Ensembl104,VISTA	NG_053226.1	Homo_sapiens
NC_000002.12	45650949	45651244	RefSeqFE_enhancer_GeneID:112840936	UTR-overlapping,exon-overlapping,gene-overlapping	protein_coding_GeneID:102724965_LOC102724965	ENCODEcCRE,Ensembl104	NG_061303.1	Homo_sapiens
NC_000002.12	45960089	45960384	RefSeqFE_enhancer_GeneID:112840937	gene-overlapping,intronic	protein_coding_GeneID:5581_PRKCE	ENCODEcCRE,Ensembl104	NG_061304.1	Homo_sapiens
NC_000002.12	46269629	46269924	RefSeqFE_enhancer_GeneID:112840938	gene-overlapping,intronic	lncRNA_GeneID:101926974_LOC101926974	ENCODEcCRE	NG_061305.1	Homo_sapiens
NC_000002.12	46283749	46284044	RefSeqFE_enhancer_GeneID:112840939	gene-overlapping,intronic	lncRNA_GeneID:101926974_LOC101926974	.	NG_061306.1	Homo_sapiens
NC_000002.12	46351809	46352104	RefSeqFE_enhancer_GeneID:112840940	gene-overlapping,intronic	protein_coding_GeneID:2034_EPAS1[ClinVar_submission_gene,RSG_gene]	ENCODEcCRE,FANTOM5,dbSUPER	NG_061307.1	Homo_sapiens
NC_000002.12	46435029	46435324	RefSeqFE_enhancer_GeneID:111776219	gene-overlapping,intronic	lncRNA_GeneID:101805491_LINC02583	ENCODEcCRE,Ensembl104,FANTOM5	NG_056188.1	Homo_sapiens
NC_000002.12	46435029	46435324	RefSeqFE_silencer_GeneID:111776219	gene-overlapping,intronic	lncRNA_GeneID:101805491_LINC02583	ENCODEcCRE,Ensembl104,FANTOM5	NG_056188.1	Homo_sapiens
NC_000002.12	46849809	46850104	RefSeqFE_enhancer_GeneID:112840941	UTR-overlapping,exon-overlapping,gene-overlapping	lncRNA_GeneID:100134259_LINC01119,lncRNA_GeneID:107985880_LOC107985880	ENCODEcCRE,Ensembl104,FANTOM5,dbSUPER	NG_061308.1	Homo_sapiens
NC_000002.12	46871949	46872244	RefSeqFE_enhancer_GeneID:112840942	intergenic_gene_5prime-distal	.	ENCODEcCRE,Ensembl104,dbSUPER	NG_061309.1	Homo_sapiens
NC_000002.12	46871949	46872244	RefSeqFE_silencer_GeneID:112840942	intergenic_gene_5prime-distal	.	ENCODEcCRE,Ensembl104,dbSUPER	NG_061309.1	Homo_sapiens
NC_000002.12	46967949	46968244	RefSeqFE_enhancer_GeneID:111776220	gene-overlapping,intronic	protein_coding_GeneID:57217_TTC7A[ClinVar_submission_gene,LRG_gene,RSG_gene]	ENCODEcCRE,Ensembl104,FANTOM5,dbSUPER	NG_056189.1	Homo_sapiens
NC_000002.12	47068635	47072293	RefSeqFE_enhancer_GeneID:110121235	gene-overlapping,intronic	protein_coding_GeneID:57217_TTC7A[ClinVar_submission_gene,LRG_gene,RSG_gene]	ENCODEcCRE,Ensembl104,FANTOM5,VISTA,dbSUPER	NG_053850.1	Homo_sapiens
NC_000002.12	47340089	47340384	RefSeqFE_silencer_GeneID:114004372	gene-overlapping,intronic	lncRNA_GeneID:101927043_EPCAM-DT	ENCODEcCRE,dbSUPER	NG_063792.1	Homo_sapiens
NC_000002.12	48120869	48121164	RefSeqFE_enhancer_GeneID:112840943	gene-overlapping,intronic	lncRNA_GeneID:105374593_LOC105374593	ENCODEcCRE,Ensembl104,FANTOM5	NG_061310.1	Homo_sapiens
NC_000002.12	49971631	49975473	RefSeqFE_enhancer_GeneID:114827832	gene-overlapping,intronic	protein_coding_GeneID:9378_NRXN1[ClinVar_submission_gene,RSG_gene]	ENCODEcCRE,Ensembl104,VISTA	NG_065188.1	Homo_sapiens
NC_000002.12	50613289	50616899	RefSeqFE_enhancer_GeneID:110121071	gene-overlapping,intronic	protein_coding_GeneID:9378_NRXN1[ClinVar_submission_gene,RSG_gene]	ENCODEcCRE,Ensembl104,VISTA	NG_053691.1	Homo_sapiens
NC_000002.12	55116072	55116367	RefSeqFE_enhancer_GeneID:112841579	gene-overlapping,intronic	protein_coding_GeneID:57142_RTN4[RSG_gene]	ENCODEcCRE,dbSUPER	NG_061312.1	Homo_sapiens
NC_000002.12	55133892	55134187	RefSeqFE_enhancer_GeneID:112841580	gene-overlapping,intronic	protein_coding_GeneID:57142_RTN4[RSG_gene]	ENCODEcCRE,FANTOM5,dbSUPER	NG_061313.1	Homo_sapiens
NC_000002.12	55140427	55141011	RefSeqFE_transcriptional_cis_regulatory_region_GeneID:115945158	intergenic_gene_5prime-distal	.	ENCODEcCRE,dbSUPER	NG_066558.1	Homo_sapiens
NC_000002.12	58112573	58113270	RefSeqFE_CAGE_cluster_GeneID:108281131	gene-overlapping,intronic	protein_coding_GeneID:7444_VRK2[RSG_gene]	ENCODEcCRE,FANTOM5	NG_051082.1	Homo_sapiens
NC_000002.12	58112606	58113191	RefSeqFE_enhancer_GeneID:108281131	gene-overlapping,intronic	protein_coding_GeneID:7444_VRK2[RSG_gene]	ENCODEcCRE,FANTOM5	NG_051082.1	Homo_sapiens
NC_000002.12	58521204	58523005	RefSeqFE_enhancer_GeneID:110121015	gene-overlapping,intronic	lncRNA_GeneID:400955_LINC01122	ENCODEcCRE,Ensembl104,VISTA	NG_053636.1	Homo_sapiens
NC_000002.12	58572593	58573472	RefSeqFE_enhancer_GeneID:110120980	gene-overlapping,intronic	lncRNA_GeneID:400955_LINC01122	Ensembl104,VISTA	NG_053601.1	Homo_sapiens
NC_000002.12	58632861	58634539	RefSeqFE_enhancer_GeneID:110121008	gene-overlapping,intronic	lncRNA_GeneID:400955_LINC01122	ENCODEcCRE,Ensembl104,VISTA	NG_053629.1	Homo_sapiens
NC_000002.12	58748602	58749980	RefSeqFE_enhancer_GeneID:110120979	gene-overlapping,intronic	lncRNA_GeneID:400955_LINC01122	ENCODEcCRE,VISTA	NG_053600.1	Homo_sapiens
NC_000002.12	58874935	58876245	RefSeqFE_enhancer_GeneID:110121024	gene-overlapping,intronic	lncRNA_GeneID:400955_LINC01122	Ensembl104,VISTA	NG_053645.1	Homo_sapiens
NC_000002.12	58951856	58953107	RefSeqFE_enhancer_GeneID:110121018	gene-overlapping,intronic	lncRNA_GeneID:400955_LINC01122	ENCODEcCRE,Ensembl104,VISTA	NG_053639.1	Homo_sapiens
NC_000002.12	58971769	58973394	RefSeqFE_enhancer_GeneID:110120667	gene-overlapping,intronic	lncRNA_GeneID:400955_LINC01122	Ensembl104,VISTA	NG_053293.1	Homo_sapiens
NC_000002.12	59077838	59079758	RefSeqFE_enhancer_GeneID:110120817	intergenic_gene_5prime-distal	.	ENCODEcCRE,VISTA	NG_053442.1	Homo_sapiens
NC_000002.12	59249468	59250820	RefSeqFE_enhancer_GeneID:110120997	UTR-overlapping,exon-overlapping,gene-overlapping	lncRNA_GeneID:101927285_LINC01793,lncRNA_GeneID:105374754_LOC105374754	ENCODEcCRE,Ensembl104,VISTA	NG_053618.1	Homo_sapiens
NC_000002.12	59313504	59314802	RefSeqFE_enhancer_GeneID:110120782	gene-overlapping,intronic	lncRNA_GeneID:105374754_LOC105374754	ENCODEcCRE,Ensembl104,VISTA	NG_053407.1	Homo_sapiens
NC_000002.12	59519241	59519857	RefSeqFE_enhancer_GeneID:110120668	intergenic_gene_5prime-distal	.	VISTA	NG_053294.1	Homo_sapiens
NC_000002.12	60125378	60126467	RefSeqFE_enhancer_GeneID:110120767	intergenic_gene_5prime-distal	.	Ensembl104,VISTA,dbSUPER	NG_053392.1	Homo_sapiens
NC_000002.12	60214359	60215380	RefSeqFE_enhancer_GeneID:110120669	intergenic_gene_5prime-distal	.	ENCODEcCRE,Ensembl104,VISTA	NG_053295.1	Homo_sapiens
NC_000002.12	60270921	60274878	RefSeqFE_enhancer_GeneID:110121136	intergenic_gene_5prime-distal	.	VISTA	NG_053755.1	Homo_sapiens
NC_000002.12	60534268	60535938	RefSeqFE_enhancer_GeneID:110120811	gene-overlapping,intronic	protein_coding_GeneID:53335_BCL11A[ClinVar_submission_gene,RSG_gene]	ENCODEcCRE,Ensembl104,VISTA,dbSUPER	NG_053436.1	Homo_sapiens
NC_000002.12	60627920	60629753	RefSeqFE_enhancer_GeneID:110121003	intergenic_gene_5prime-distal	.	ENCODEcCRE,Ensembl104,VISTA	NG_053624.1	Homo_sapiens
NC_000002.12	62966719	62967794	RefSeqFE_enhancer_GeneID:110120746	gene-overlapping,intronic	protein_coding_GeneID:23301_EHBP1[RSG_gene]	ENCODEcCRE,Ensembl104,VISTA	NG_053371.1	Homo_sapiens
NC_000002.12	63048559	63049968	RefSeqFE_enhancer_GeneID:110120978	UTR-overlapping,exon-overlapping,gene-overlapping	protein_coding_GeneID:5013_OTX1	ENCODEcCRE,Ensembl104,VISTA	NG_053599.1	Homo_sapiens
NC_000002.12	65834492	65835732	RefSeqFE_enhancer_GeneID:111258503	intergenic_gene_5prime-distal	.	ENCODEcCRE,Ensembl104	NG_055598.1	Homo_sapiens
NC_000002.12	65864154	65865818	RefSeqFE_enhancer_GeneID:111258504	intergenic_gene_5prime-distal	.	ENCODEcCRE,Ensembl104	NG_055599.1	Homo_sapiens
NC_000002.12	66070392	66072080	RefSeqFE_enhancer_GeneID:110120611	gene-overlapping,intronic	lncRNA_GeneID:105369168_LOC105369168	ENCODEcCRE,Ensembl104,VISTA	NG_053239.1	Homo_sapiens
NC_000002.12	66384301	66385496	RefSeqFE_enhancer_GeneID:111258516	gene-overlapping,intronic	lncRNA_GeneID:729348_LINC01873	.	NG_055609.1	Homo_sapiens
NC_000002.12	66433298	66433651	RefSeqFE_enhancer_GeneID:111258501	UTR-overlapping,exon-overlapping,gene-overlapping	lncRNA_GeneID:730198_MEIS1-AS3	ENCODEcCRE,Ensembl104,dbSUPER	NG_055597.1	Homo_sapiens
NC_000002.12	66433346	66433747	RefSeqFE_DNAseI_hypersensitive_site_GeneID:111258501	UTR-overlapping,exon-overlapping,gene-overlapping	lncRNA_GeneID:730198_MEIS1-AS3	ENCODEcCRE,Ensembl104,dbSUPER	NG_055597.1	Homo_sapiens
NC_000002.12	66434520	66435397	RefSeqFE_enhancer_GeneID:111258501	UTR-overlapping,exon-overlapping,gene-overlapping	protein_coding_GeneID:4211_MEIS1[RSG_gene]	ENCODEcCRE,Ensembl104,FANTOM5,dbSUPER	NG_055597.1	Homo_sapiens
NC_000002.12	66434882	66435423	RefSeqFE_promoter_GeneID:111258501	UTR-overlapping,exon-overlapping,gene-overlapping	protein_coding_GeneID:4211_MEIS1[RSG_gene]	ENCODEcCRE,Ensembl104,dbSUPER	NG_055597.1	Homo_sapiens
NC_000002.12	66435053	66435854	RefSeqFE_DNAseI_hypersensitive_site_GeneID:111258501	UTR-overlapping,exon-overlapping,gene-overlapping	protein_coding_GeneID:4211_MEIS1[RSG_gene]	ENCODEcCRE,Ensembl104,dbSUPER	NG_055597.1	Homo_sapiens
NC_000002.12	66435093	66435123	RefSeqFE_protein_binding_site_E74_like_ETS_transcription_factor_GeneID:111258501	intergenic_gene_5prime-proximal	.	ENCODEcCRE,Ensembl104,dbSUPER	NG_055597.1	Homo_sapiens
NC_000002.12	66435093	66435123	RefSeqFE_protein_binding_site_GA_binding_protein_transcription_factor_alpha_subunit_GeneID:111258501	intergenic_gene_5prime-proximal	.	ENCODEcCRE,Ensembl104,dbSUPER	NG_055597.1	Homo_sapiens
NC_000002.12	66435103	66435124	RefSeqFE_protein_binding_site_Spi-1_proto-oncogene_GeneID:111258501	intergenic_gene_5prime-proximal	.	ENCODEcCRE,Ensembl104,dbSUPER	NG_055597.1	Homo_sapiens
NC_000002.12	66442439	66444082	RefSeqFE_enhancer_GeneID:111258505	gene-overlapping,intronic	protein_coding_GeneID:4211_MEIS1[RSG_gene]	ENCODEcCRE,Ensembl104,dbSUPER	NG_055600.1	Homo_sapiens
NC_000002.12	66443716	66444317	RefSeqFE_DNAseI_hypersensitive_site_GeneID:111258505	gene-overlapping,intronic	protein_coding_GeneID:4211_MEIS1[RSG_gene]	ENCODEcCRE,Ensembl104,dbSUPER	NG_055600.1	Homo_sapiens
NC_000002.12	66445717	66446054	RefSeqFE_enhancer_GeneID:111258520	gene-overlapping,intronic	protein_coding_GeneID:4211_MEIS1[RSG_gene]	ENCODEcCRE,Ensembl104,dbSUPER	NG_055612.1	Homo_sapiens
NC_000002.12	66445717	66446918	RefSeqFE_DNAseI_hypersensitive_site_GeneID:111258520	gene-overlapping,intronic	protein_coding_GeneID:4211_MEIS1[RSG_gene]	ENCODEcCRE,Ensembl104,dbSUPER	NG_055612.1	Homo_sapiens
NC_000002.12	66461006	66463960	RefSeqFE_enhancer_GeneID:111258517	gene-overlapping,intronic	protein_coding_GeneID:4211_MEIS1[RSG_gene]	ENCODEcCRE,Ensembl104,dbSUPER	NG_055610.1	Homo_sapiens
NC_000002.12	66507191	66510455	RefSeqFE_enhancer_GeneID:111258506	gene-overlapping,intronic	protein_coding_GeneID:4211_MEIS1[RSG_gene]	ENCODEcCRE,Ensembl104,dbSUPER	NG_055601.1	Homo_sapiens
NC_000002.12	66507590	66509118	RefSeqFE_enhancer_GeneID:111258506	gene-overlapping,intronic	protein_coding_GeneID:4211_MEIS1[RSG_gene]	ENCODEcCRE,Ensembl104,dbSUPER	NG_055601.1	Homo_sapiens
NC_000002.12	66521122	66523909	RefSeqFE_enhancer_GeneID:111258518	gene-overlapping,intronic	protein_coding_GeneID:4211_MEIS1[RSG_gene]	ENCODEcCRE,Ensembl104,VISTA	NG_055611.1	Homo_sapiens
NC_000002.12	66526037	66527466	RefSeqFE_enhancer_GeneID:111258521	gene-overlapping,intronic	protein_coding_GeneID:4211_MEIS1[RSG_gene]	ENCODEcCRE,Ensembl104	NG_055613.1	Homo_sapiens
NC_000002.12	66535382	66537956	RefSeqFE_enhancer_GeneID:110121028	gene-overlapping,intronic	protein_coding_GeneID:4211_MEIS1[RSG_gene]	ENCODEcCRE,Ensembl104,VISTA,dbSUPER	NG_053649.1	Homo_sapiens
NC_000002.12	66536774	66537718	RefSeqFE_enhancer_GeneID:110121028	gene-overlapping,intronic	protein_coding_GeneID:4211_MEIS1[RSG_gene]	ENCODEcCRE,Ensembl104,VISTA,dbSUPER	NG_053649.1	Homo_sapiens
NC_000002.12	66536882	66537599	RefSeqFE_enhancer_GeneID:110121028	gene-overlapping,intronic	protein_coding_GeneID:4211_MEIS1[RSG_gene]	ENCODEcCRE,Ensembl104,VISTA,dbSUPER	NG_053649.1	Homo_sapiens
NC_000002.12	66537156	66537196	RefSeqFE_protein_binding_site_cAMP_responsive_element_binding_protein_1_GeneID:110121028	gene-overlapping,intronic	protein_coding_GeneID:4211_MEIS1[RSG_gene]	ENCODEcCRE,Ensembl104,VISTA,dbSUPER	NG_053649.1	Homo_sapiens
NC_000002.12	66547617	66548309	RefSeqFE_enhancer_GeneID:111258507	CDS-overlapping,exon-overlapping,gene-overlapping	protein_coding_GeneID:4211_MEIS1[RSG_gene]	Ensembl104,dbSUPER	NG_055602.1	Homo_sapiens
NC_000002.12	66548220	66549986	RefSeqFE_enhancer_GeneID:111258507	gene-overlapping,intronic	protein_coding_GeneID:4211_MEIS1[RSG_gene]	Ensembl104,dbSUPER	NG_055602.1	Homo_sapiens
NC_000002.12	66554607	66556426	RefSeqFE_enhancer_GeneID:111258508	gene-overlapping,intronic	protein_coding_GeneID:4211_MEIS1[RSG_gene]	ENCODEcCRE,dbSUPER	NG_055603.1	Homo_sapiens
NC_000002.12	66568893	66570974	RefSeqFE_enhancer_GeneID:111258509	gene-overlapping,intronic	protein_coding_GeneID:4211_MEIS1[RSG_gene]	ENCODEcCRE,Ensembl104,dbSUPER	NG_055604.1	Homo_sapiens
NC_000002.12	66569209	66569610	RefSeqFE_DNAseI_hypersensitive_site_GeneID:111258509	gene-overlapping,intronic	protein_coding_GeneID:4211_MEIS1[RSG_gene]	ENCODEcCRE,Ensembl104,dbSUPER	NG_055604.1	Homo_sapiens
NC_000002.12	66569479	66569524	RefSeqFE_conserved_region_GeneID:111258509	gene-overlapping,intronic	protein_coding_GeneID:4211_MEIS1[RSG_gene]	ENCODEcCRE,Ensembl104,dbSUPER	NG_055604.1	Homo_sapiens
NC_000002.12	66570952	66572869	RefSeqFE_enhancer_GeneID:111258509	UTR-overlapping,exon-overlapping,gene-overlapping	protein_coding_GeneID:4211_MEIS1[RSG_gene]	ENCODEcCRE,dbSUPER	NG_055604.1	Homo_sapiens
NC_000002.12	66574774	66575775	RefSeqFE_DNAseI_hypersensitive_site_GeneID:111258511	gene-overlapping,intronic	lncRNA_GeneID:100507073_LINC01798	ENCODEcCRE,Ensembl104,FANTOM5,dbSUPER	NG_055605.1	Homo_sapiens
NC_000002.12	66575263	66575719	RefSeqFE_enhancer_GeneID:111258511	gene-overlapping,intronic	lncRNA_GeneID:100507073_LINC01798	ENCODEcCRE,Ensembl104,dbSUPER	NG_055605.1	Homo_sapiens
NC_000002.12	66576831	66577632	RefSeqFE_DNAseI_hypersensitive_site_GeneID:111258511	gene-overlapping,intronic	lncRNA_GeneID:100507073_LINC01798	ENCODEcCRE,Ensembl104,FANTOM5,dbSUPER	NG_055605.1	Homo_sapiens
NC_000002.12	66578123	66578924	RefSeqFE_DNAseI_hypersensitive_site_GeneID:111258511	gene-overlapping,intronic	lncRNA_GeneID:100507073_LINC01798	ENCODEcCRE,Ensembl104,FANTOM5,dbSUPER	NG_055605.1	Homo_sapiens
NC_000002.12	66578233	66579843	RefSeqFE_enhancer_GeneID:111258511	gene-overlapping,intronic	lncRNA_GeneID:100507073_LINC01798	ENCODEcCRE,Ensembl104,FANTOM5,dbSUPER	NG_055605.1	Homo_sapiens
NC_000002.12	66824968	66825769	RefSeqFE_enhancer_GeneID:110121039	intergenic_gene_5prime-distal	.	Ensembl104,VISTA	NG_053660.1	Homo_sapiens
NC_000002.12	66994698	66996299	RefSeqFE_enhancer_GeneID:111258513	gene-overlapping,intronic	lncRNA_GeneID:105374785_LOC105374785	.	NG_055606.1	Homo_sapiens
NC_000002.12	67053941	67055675	RefSeqFE_enhancer_GeneID:110120780	intergenic_gene_5prime-distal	.	ENCODEcCRE,Ensembl104,VISTA	NG_053405.2	Homo_sapiens
NC_000002.12	67054124	67055408	RefSeqFE_enhancer_GeneID:110120780	intergenic_gene_5prime-distal	.	ENCODEcCRE,VISTA	NG_053405.2	Homo_sapiens
NC_000002.12	67235440	67236882	RefSeqFE_enhancer_GeneID:111258514	gene-overlapping,intronic	lncRNA_GeneID:101927661_LOC101927661,lncRNA_GeneID:102800447_LINC01828	.	NG_055607.1	Homo_sapiens
NC_000002.12	67266606	67268379	RefSeqFE_enhancer_GeneID:111258515	gene-overlapping,intronic	lncRNA_GeneID:102800447_LINC01828	ENCODEcCRE	NG_055608.1	Homo_sapiens
NC_000002.12	67266699	67268606	RefSeqFE_enhancer_GeneID:111258515	gene-overlapping,intronic	lncRNA_GeneID:102800447_LINC01828	ENCODEcCRE,Ensembl104	NG_055608.1	Homo_sapiens
NC_000002.12	68192840	68194859	RefSeqFE_enhancer_GeneID:110121243	gene-overlapping,intronic	protein_coding_GeneID:5534_PPP3R1	ENCODEcCRE,Ensembl104,VISTA,dbSUPER	NG_053858.1	Homo_sapiens
NC_000002.12	68352630	68353045	RefSeqFE_transcriptional_cis_regulatory_region_GeneID:115945159	intergenic_gene_5prime-distal	.	ENCODEcCRE,Ensembl104,dbSUPER	NG_066559.1	Homo_sapiens
NC_000002.12	68714936	68715231	RefSeqFE_enhancer_GeneID:112841582	gene-overlapping,intronic	protein_coding_GeneID:9938_ARHGAP25	ENCODEcCRE,Ensembl104,dbSUPER	NG_061317.1	Homo_sapiens
NC_000002.12	68829101	68829733	RefSeqFE_transcriptional_cis_regulatory_region_GeneID:115945160	intergenic_gene_5prime-distal	.	ENCODEcCRE,Ensembl104,FANTOM5,dbSUPER	NG_066560.1	Homo_sapiens
NC_000002.12	68876107	68881483	RefSeqFE_enhancer_GeneID:114827836	gene-overlapping,intronic	lncRNA_GeneID:105374792_LOC105374792	ENCODEcCRE,Ensembl104,VISTA,dbSUPER	NG_065192.1	Homo_sapiens
NC_000002.12	69171456	69171751	RefSeqFE_enhancer_GeneID:112841589	gene-overlapping,intronic	protein_coding_GeneID:84168_ANTXR1[ClinVar_submission_gene,RSG_gene]	ENCODEcCRE,dbSUPER	NG_061322.1	Homo_sapiens
NC_000002.12	69178376	69178671	RefSeqFE_enhancer_GeneID:112841592	gene-overlapping,intronic	protein_coding_GeneID:84168_ANTXR1[ClinVar_submission_gene,RSG_gene]	ENCODEcCRE,dbSUPER	NG_061326.1	Homo_sapiens
NC_000002.12	70070856	70071151	RefSeqFE_enhancer_GeneID:112841595	gene-overlapping,intronic	lncRNA_GeneID:400960_PCBP1-AS1[ClinVar_submission_gene,RSG_gene],protein_coding_GeneID:151516_ASPRV1[ClinVar_submission_gene,RSG_gene]	ENCODEcCRE,Ensembl104,dbSUPER	NG_061328.1	Homo_sapiens
NC_000002.12	70088614	70088781	RefSeqFE_enhancer_GeneID:106783504	CDS-overlapping,exon-overlapping,gene-overlapping	protein_coding_GeneID:5093_PCBP1[ClinVar_submission_gene,RSG_gene]	ENCODEcCRE,Ensembl104,dbSUPER	NG_046088.1	Homo_sapiens
NC_000002.12	71348358	71348653	RefSeqFE_silencer_GeneID:114004373	UTR-overlapping,exon-overlapping,gene-overlapping	protein_coding_GeneID:27332_ZNF638	Ensembl104	NG_063793.1	Homo_sapiens
NC_000002.12	71490875	71494083	RefSeqFE_enhancer_GeneID:110121268	gene-overlapping,intronic	protein_coding_GeneID:8291_DYSF[ClinVar_submission_gene,RSG_gene]	ENCODEcCRE,Ensembl104,VISTA,dbSUPER	NG_053883.1	Homo_sapiens
NC_000002.12	71670882	71673762	RefSeqFE_enhancer_GeneID:110121121	gene-overlapping,intronic	protein_coding_GeneID:8291_DYSF[ClinVar_submission_gene,RSG_gene]	ENCODEcCRE,Ensembl104,VISTA	NG_053740.1	Homo_sapiens
NC_000002.12	72897600	72898962	RefSeqFE_enhancer_GeneID:110120967	intergenic_gene_5prime-distal	.	ENCODEcCRE,VISTA	NG_053588.1	Homo_sapiens
NC_000002.12	72901284	72902066	RefSeqFE_transcriptional_cis_regulatory_region_GeneID:115945161	gene-overlapping,intronic	pseudogene_GeneID:100419678_LOC100419678	ENCODEcCRE,Ensembl104	NG_066561.1	Homo_sapiens
NC_000002.12	73214100	73214395	RefSeqFE_enhancer_GeneID:112841596	CDS-overlapping,exon-overlapping,gene-overlapping	protein_coding_GeneID:10322_SMYD5	ENCODEcCRE,Ensembl104	NG_061329.1	Homo_sapiens
NC_000002.12	73344040	73344335	RefSeqFE_enhancer_GeneID:112841597	intergenic_gene_5prime-distal	.	ENCODEcCRE	NG_061330.1	Homo_sapiens
NC_000002.12	74503221	74503516	RefSeqFE_enhancer_GeneID:112841598	UTR-overlapping,exon-overlapping,gene-overlapping	lncRNA_GeneID:151534_LBX2-AS1,protein_coding_GeneID:85474_LBX2	ENCODEcCRE,Ensembl104,dbSUPER	NG_061331.1	Homo_sapiens
NC_000002.12	75646582	75646877	RefSeqFE_enhancer_GeneID:112841599	CDS-overlapping,exon-overlapping,gene-overlapping	protein_coding_GeneID:9801_MRPL19	ENCODEcCRE,Ensembl104	NG_061332.1	Homo_sapiens
NC_000002.12	77088676	77091793	RefSeqFE_mobile_genetic_element_GeneID:108021854	gene-overlapping,intronic	protein_coding_GeneID:80059_LRRTM4[ClinVar_submission_gene,RSG_gene]	FANTOM5,dbSUPER	NG_050884.1	Homo_sapiens
NC_000002.12	77091142	77091192	RefSeqFE_non_allelic_homologous_recombination_region_GeneID:108021854	gene-overlapping,intronic	protein_coding_GeneID:80059_LRRTM4[ClinVar_submission_gene,RSG_gene]	dbSUPER	NG_050884.1	Homo_sapiens
NC_000002.12	77091294	77091435	RefSeqFE_non_allelic_homologous_recombination_region_GeneID:108021854	gene-overlapping,intronic	protein_coding_GeneID:80059_LRRTM4[ClinVar_submission_gene,RSG_gene]	dbSUPER	NG_050884.1	Homo_sapiens
NC_000002.12	77091550	77091614	RefSeqFE_non_allelic_homologous_recombination_region_GeneID:108021854	gene-overlapping,intronic	protein_coding_GeneID:80059_LRRTM4[ClinVar_submission_gene,RSG_gene]	dbSUPER	NG_050884.1	Homo_sapiens
NC_000002.12	77966029	77968522	RefSeqFE_mobile_genetic_element_GeneID:108021855	gene-overlapping,intronic	lncRNA_GeneID:101927967_LOC101927967	.	NG_050885.1	Homo_sapiens
NC_000002.12	77967875	77967925	RefSeqFE_non_allelic_homologous_recombination_region_GeneID:108021855	gene-overlapping,intronic	lncRNA_GeneID:101927967_LOC101927967	.	NG_050885.1	Homo_sapiens
NC_000002.12	77968027	77968168	RefSeqFE_non_allelic_homologous_recombination_region_GeneID:108021855	gene-overlapping,intronic	lncRNA_GeneID:101927967_LOC101927967	.	NG_050885.1	Homo_sapiens
NC_000002.12	77968283	77968347	RefSeqFE_non_allelic_homologous_recombination_region_GeneID:108021855	gene-overlapping,intronic	lncRNA_GeneID:101927967_LOC101927967	.	NG_050885.1	Homo_sapiens
NC_000002.12	82875944	82876239	RefSeqFE_enhancer_GeneID:112841601	intergenic_gene_5prime-distal	.	Ensembl104	NG_061334.1	Homo_sapiens
NC_000002.12	83969100	83969419	RefSeqFE_transcriptional_cis_regulatory_region_GeneID:115945162	intergenic_gene_5prime-distal	.	Ensembl104	NG_066562.1	Homo_sapiens
NC_000002.12	84919876	84920465	RefSeqFE_transcriptional_cis_regulatory_region_GeneID:115945164	intergenic_gene_5prime-distal	.	ENCODEcCRE,FANTOM5,dbSUPER	NG_066563.1	Homo_sapiens
NC_000002.12	85770343	85773882	RefSeqFE_enhancer_GeneID:110121178	UTR-overlapping,exon-overlapping,gene-overlapping	protein_coding_GeneID:84913_ATOH8	ENCODEcCRE,Ensembl104,VISTA,dbSUPER	NG_053796.1	Homo_sapiens
NC_000002.12	85993877	85994391	RefSeqFE_transcriptional_cis_regulatory_region_GeneID:115945183	gene-overlapping,intronic	lncRNA_GeneID:105374843_LOC105374843	ENCODEcCRE,FANTOM5,dbSUPER	NG_066564.1	Homo_sapiens
NC_000002.12	86039326	86039457	RefSeqFE_enhancer_GeneID:106783498	CDS-overlapping,exon-overlapping,gene-overlapping	protein_coding_GeneID:25885_POLR1A[ClinVar_submission_gene,RSG_gene]	ENCODEcCRE,Ensembl104,dbSUPER	NG_046082.1	Homo_sapiens
NC_000002.12	86218165	86218460	RefSeqFE_enhancer_GeneID:112841602	gene-overlapping,intronic	protein_coding_GeneID:65055_REEP1[ClinVar_submission_gene,LRG_gene,RSG_gene]	.	NG_061335.1	Homo_sapiens
NC_000002.12	86563305	86563600	RefSeqFE_enhancer_GeneID:112841603	CDS-overlapping,exon-overlapping,gene-overlapping	lncRNA_GeneID:105374845_LOC105374845,protein_coding_GeneID:100526767_RNF103-CHMP3,protein_coding_GeneID:51652_CHMP3	ENCODEcCRE,Ensembl104	NG_061336.1	Homo_sapiens
NC_000002.12	86786075	86787231	RefSeqFE_enhancer_GeneID:106699567	gene-overlapping,intronic	protein_coding_GeneID:925_CD8A[ClinVar_submission_gene,LRG_gene,RSG_gene]	ENCODEcCRE,Ensembl104,dbSUPER	NG_044961.1	Homo_sapiens
NC_000002.12	86786075	86788076	RefSeqFE_DNAseI_hypersensitive_site_GeneID:106699567	gene-overlapping,intronic	protein_coding_GeneID:925_CD8A[ClinVar_submission_gene,LRG_gene,RSG_gene]	ENCODEcCRE,Ensembl104,FANTOM5,dbSUPER	NG_044961.1	Homo_sapiens
NC_000002.12	86786179	86787231	RefSeqFE_enhancer_GeneID:106699567	gene-overlapping,intronic	protein_coding_GeneID:925_CD8A[ClinVar_submission_gene,LRG_gene,RSG_gene]	ENCODEcCRE,Ensembl104,dbSUPER	NG_044961.1	Homo_sapiens
NC_000002.12	86786359	86787019	RefSeqFE_enhancer_GeneID:106699567	gene-overlapping,intronic	protein_coding_GeneID:925_CD8A[ClinVar_submission_gene,LRG_gene,RSG_gene]	ENCODEcCRE,dbSUPER	NG_044961.1	Homo_sapiens
NC_000002.12	86786366	86786397	RefSeqFE_protein_binding_site_v-ets_avian_erythroblastosis_virus_E26_oncogene_homolog_1_GeneID:106699567	gene-overlapping,intronic	protein_coding_GeneID:925_CD8A[ClinVar_submission_gene,LRG_gene,RSG_gene]	ENCODEcCRE,dbSUPER	NG_044961.1	Homo_sapiens
NC_000002.12	86786611	86786642	RefSeqFE_protein_binding_site_hepatocyte_nuclear_factor_1-alpha_GeneID:106699567	gene-overlapping,intronic	protein_coding_GeneID:925_CD8A[ClinVar_submission_gene,LRG_gene,RSG_gene]	dbSUPER	NG_044961.1	Homo_sapiens
NC_000002.12	86786738	86787020	RefSeqFE_mobile_genetic_element_GeneID:106699567	gene-overlapping,intronic	protein_coding_GeneID:925_CD8A[ClinVar_submission_gene,LRG_gene,RSG_gene]	dbSUPER	NG_044961.1	Homo_sapiens
NC_000002.12	86786765	86786794	RefSeqFE_protein_binding_site_IKAROS_family_zinc_finger_1_(Ikaros)_GeneID:106699567	gene-overlapping,intronic	protein_coding_GeneID:925_CD8A[ClinVar_submission_gene,LRG_gene,RSG_gene]	dbSUPER	NG_044961.1	Homo_sapiens
NC_000002.12	86786866	86787253	RefSeqFE_sequence_secondary_structure_GeneID:106699567	gene-overlapping,intronic	protein_coding_GeneID:925_CD8A[ClinVar_submission_gene,LRG_gene,RSG_gene]	Ensembl104,dbSUPER	NG_044961.1	Homo_sapiens
NC_000002.12	86786899	86786928	RefSeqFE_protein_binding_site_IKAROS_family_zinc_finger_1_(Ikaros)_GeneID:106699567	gene-overlapping,intronic	protein_coding_GeneID:925_CD8A[ClinVar_submission_gene,LRG_gene,RSG_gene]	dbSUPER	NG_044961.1	Homo_sapiens
NC_000002.12	86786986	86787017	RefSeqFE_protein_binding_site_GATA_binding_protein_3_GeneID:106699567	gene-overlapping,intronic	protein_coding_GeneID:925_CD8A[ClinVar_submission_gene,LRG_gene,RSG_gene]	dbSUPER	NG_044961.1	Homo_sapiens
NC_000002.12	86787047	86787231	RefSeqFE_transcriptional_cis_regulatory_region_GeneID:106699567	gene-overlapping,intronic	protein_coding_GeneID:925_CD8A[ClinVar_submission_gene,LRG_gene,RSG_gene]	Ensembl104,dbSUPER	NG_044961.1	Homo_sapiens
NC_000002.12	86787099	86787253	RefSeqFE_mobile_genetic_element_GeneID:106699567	gene-overlapping,intronic	protein_coding_GeneID:925_CD8A[ClinVar_submission_gene,LRG_gene,RSG_gene]	Ensembl104,dbSUPER	NG_044961.1	Homo_sapiens
NC_000002.12	86788784	86789185	RefSeqFE_DNAseI_hypersensitive_site_GeneID:106699567	gene-overlapping,intronic	protein_coding_GeneID:925_CD8A[ClinVar_submission_gene,LRG_gene,RSG_gene]	ENCODEcCRE,Ensembl104,dbSUPER	NG_044961.1	Homo_sapiens
NC_000002.12	88057492	88057858	RefSeqFE_transcriptional_cis_regulatory_region_GeneID:115945184	intergenic_gene_5prime-proximal	.	ENCODEcCRE	NG_066565.1	Homo_sapiens
NC_000002.12	88067280	88067681	RefSeqFE_enhancer_GeneID:111721706	intergenic_gene_5prime-proximal	.	ENCODEcCRE	NG_056149.1	Homo_sapiens
NC_000002.12	88845564	88846667	RefSeqFE_enhancer_GeneID:108348023	intergenic_gene_5prime-distal	.	ENCODEcCRE,Ensembl104,FANTOM5,dbSUPER	NG_051176.1	Homo_sapiens
NC_000002.12	96157889	96158184	RefSeqFE_enhancer_GeneID:112841606	intergenic_gene_5prime-distal	.	ENCODEcCRE,Ensembl104,FANTOM5,dbSUPER	NG_061339.1	Homo_sapiens
NC_000002.12	96225110	96225405	RefSeqFE_enhancer_GeneID:112841607	gene-overlapping,intronic	lncRNA_GeneID:285033_STARD7-AS1	ENCODEcCRE,Ensembl104,dbSUPER	NG_061340.1	Homo_sapiens
NC_000002.12	96257963	96261352	RefSeqFE_enhancer_GeneID:110121224	gene-overlapping,intronic	protein_coding_GeneID:55654_TMEM127[ClinVar_submission_gene,LRG_gene,RSG_gene]	ENCODEcCRE,Ensembl104,FANTOM5,VISTA,dbSUPER	NG_053839.1	Homo_sapiens
NC_000002.12	96305410	96305705	RefSeqFE_enhancer_GeneID:112841608	UTR-overlapping,exon-overlapping,gene-overlapping	protein_coding_GeneID:23020_SNRNP200[ClinVar_submission_gene,RSG_gene]	ENCODEcCRE,Ensembl104	NG_061341.1	Homo_sapiens
NC_000002.12	98016599	98016973	RefSeqFE_enhancer_blocking_element_GeneID:111721715	intergenic_gene_5prime-distal	.	dbSUPER	NG_056159.1	Homo_sapiens
NC_000002.12	98016658	98016912	RefSeqFE_mobile_genetic_element_GeneID:111721715	intergenic_gene_5prime-distal	.	dbSUPER	NG_056159.1	Homo_sapiens
NC_000002.12	98016857	98016859	RefSeqFE_transcriptional_cis_regulatory_region_GeneID:111721715	intergenic_gene_5prime-distal	.	dbSUPER	NG_056159.1	Homo_sapiens
NC_000002.12	100104798	100104824	RefSeqFE_repeat_instability_region_GeneID:109113861	gene-overlapping,intronic	protein_coding_GeneID:3899_AFF3[RSG_gene]	ENCODEcCRE,Ensembl104	NG_052019.1	Homo_sapiens
NC_000002.12	100104798	100104824	RefSeqFE_tandem_repeat_GeneID:109113861	gene-overlapping,intronic	protein_coding_GeneID:3899_AFF3[RSG_gene]	ENCODEcCRE,Ensembl104	NG_052019.1	Homo_sapiens
NC_000002.12	101109635	101113030	RefSeqFE_enhancer_GeneID:110121226	UTR-overlapping,exon-overlapping,gene-overlapping	protein_coding_GeneID:11138_TBC1D8	ENCODEcCRE,Ensembl104,VISTA,dbSUPER	NG_053841.1	Homo_sapiens
NC_000002.12	102143608	102143903	RefSeqFE_enhancer_GeneID:111828510	gene-overlapping,intronic	protein_coding_GeneID:3554_IL1R1	ENCODEcCRE,Ensembl104,dbSUPER	NG_056238.1	Homo_sapiens
NC_000002.12	102143668	102143963	RefSeqFE_enhancer_GeneID:111828510	gene-overlapping,intronic	protein_coding_GeneID:3554_IL1R1	ENCODEcCRE,Ensembl104,dbSUPER	NG_056238.1	Homo_sapiens
NC_000002.12	102921902	102923410	RefSeqFE_enhancer_GeneID:110121029	intergenic_gene_5prime-distal	.	ENCODEcCRE,VISTA	NG_053650.1	Homo_sapiens
NC_000002.12	103152237	103156024	RefSeqFE_enhancer_GeneID:110121149	intergenic_gene_5prime-distal	.	VISTA	NG_053767.1	Homo_sapiens
NC_000002.12	103175869	103177361	RefSeqFE_enhancer_GeneID:110120987	intergenic_gene_5prime-distal	.	ENCODEcCRE,Ensembl104,VISTA	NG_053608.1	Homo_sapiens
NC_000002.12	103292899	103294763	RefSeqFE_enhancer_GeneID:110120992	intergenic_gene_5prime-distal	.	ENCODEcCRE,Ensembl104,VISTA	NG_053613.1	Homo_sapiens
NC_000002.12	103400187	103403366	RefSeqFE_enhancer_GeneID:110121142	intergenic_gene_5prime-distal	.	ENCODEcCRE,Ensembl104,FANTOM5,VISTA	NG_053760.1	Homo_sapiens
NC_000002.12	103668999	103670334	RefSeqFE_enhancer_GeneID:110121005	intergenic_gene_5prime-distal	.	Ensembl104,VISTA	NG_053626.1	Homo_sapiens
NC_000002.12	103737474	103740884	RefSeqFE_enhancer_GeneID:110121130	intergenic_gene_5prime-distal	.	ENCODEcCRE,Ensembl104,VISTA	NG_053749.1	Homo_sapiens
NC_000002.12	103961697	103964030	RefSeqFE_enhancer_GeneID:110121132	gene-overlapping,intronic	lncRNA_GeneID:107985928_LINC01965	ENCODEcCRE,Ensembl104,VISTA	NG_053751.1	Homo_sapiens
NC_000002.12	104051413	104054190	RefSeqFE_enhancer_GeneID:110121047	gene-overlapping,intronic	lncRNA_GeneID:107985928_LINC01965	ENCODEcCRE,Ensembl104,VISTA	NG_053667.1	Homo_sapiens
NC_000002.12	104070231	104072180	RefSeqFE_enhancer_GeneID:110121141	gene-overlapping,intronic	lncRNA_GeneID:107985928_LINC01965	Ensembl104,VISTA	NG_053759.1	Homo_sapiens
NC_000002.12	104120059	104120907	RefSeqFE_enhancer_GeneID:110120670	gene-overlapping,intronic	lncRNA_GeneID:105373523_LOC105373523	ENCODEcCRE,Ensembl104,VISTA	NG_053296.1	Homo_sapiens
NC_000002.12	104416034	104417987	RefSeqFE_enhancer_GeneID:110121001	intergenic_gene_5prime-distal	.	ENCODEcCRE,Ensembl104,VISTA,dbSUPER	NG_053622.1	Homo_sapiens
NC_000002.12	104427823	104431054	RefSeqFE_enhancer_GeneID:110121135	intergenic_gene_5prime-distal	.	ENCODEcCRE,Ensembl104,FANTOM5,VISTA,dbSUPER	NG_053754.1	Homo_sapiens
NC_000002.12	104516356	104517372	RefSeqFE_enhancer_GeneID:110120750	intergenic_gene_5prime-distal	.	VISTA	NG_053375.1	Homo_sapiens
NC_000002.12	104683885	104685199	RefSeqFE_enhancer_GeneID:110121017	intergenic_gene_5prime-distal	.	ENCODEcCRE,Ensembl104,VISTA	NG_053638.1	Homo_sapiens
NC_000002.12	104701121	104703398	RefSeqFE_enhancer_GeneID:110120814	UTR-overlapping,exon-overlapping,gene-overlapping	lncRNA_GeneID:101927383_LOC101927383	ENCODEcCRE,Ensembl104,VISTA	NG_053439.1	Homo_sapiens
NC_000002.12	104848527	104851080	RefSeqFE_enhancer_GeneID:110121140	gene-overlapping,intronic	lncRNA_GeneID:100506421_PANTR1	ENCODEcCRE,Ensembl104,FANTOM5,VISTA,dbSUPER	NG_054629.1	Homo_sapiens
NC_000002.12	104900278	104902032	RefSeqFE_enhancer_GeneID:110120821	intergenic_gene_5prime-distal	.	ENCODEcCRE,Ensembl104,VISTA	NG_053446.1	Homo_sapiens
NC_000002.12	104976870	104977165	RefSeqFE_enhancer_GeneID:112695110	gene-overlapping,intronic	lncRNA_GeneID:102724691_MRPS9-AS2	ENCODEcCRE,Ensembl104	NG_060887.1	Homo_sapiens
NC_000002.12	105080752	105081700	RefSeqFE_enhancer_GeneID:110120793	gene-overlapping,intronic	protein_coding_GeneID:64965_MRPS9	ENCODEcCRE,Ensembl104,VISTA	NG_053418.1	Homo_sapiens
NC_000002.12	105485959	105491174	RefSeqFE_enhancer_GeneID:114827847	intergenic_gene_5prime-distal	.	ENCODEcCRE,Ensembl104,VISTA,dbSUPER	NG_065203.1	Homo_sapiens
NC_000002.12	106143572	106143867	RefSeqFE_silencer_GeneID:114004366	gene-overlapping,intronic	protein_coding_GeneID:80146_UXS1	ENCODEcCRE,Ensembl104,dbSUPER	NG_063785.1	Homo_sapiens
NC_000002.12	106253838	106255451	RefSeqFE_mobile_genetic_element_GeneID:107305683	intergenic_gene_5prime-distal	.	.	NG_046763.1	Homo_sapiens
NC_000002.12	106254035	106254432	RefSeqFE_non_allelic_homologous_recombination_region_GeneID:107305683	intergenic_gene_5prime-distal	.	.	NG_046763.1	Homo_sapiens
NC_000002.12	106283432	106283727	RefSeqFE_enhancer_GeneID:112695111	intergenic_gene_5prime-distal	.	ENCODEcCRE,Ensembl104	NG_060888.1	Homo_sapiens
NC_000002.12	107921370	107922984	RefSeqFE_mobile_genetic_element_GeneID:107305684	intergenic_gene_5prime-distal	.	.	NG_046764.1	Homo_sapiens
NC_000002.12	107921566	107921963	RefSeqFE_non_allelic_homologous_recombination_region_GeneID:107305684	intergenic_gene_5prime-distal	.	.	NG_046764.1	Homo_sapiens
NC_000002.12	108521415	108521695	RefSeqFE_mobile_genetic_element_GeneID:107305685	gene-overlapping,intronic	lncRNA_GeneID:644903_GCC2-AS1	.	NG_046765.1	Homo_sapiens
NC_000002.12	108521644	108521679	RefSeqFE_non_allelic_homologous_recombination_region_GeneID:107305685	gene-overlapping,intronic	lncRNA_GeneID:644903_GCC2-AS1	.	NG_046765.1	Homo_sapiens
NC_000002.12	108662172	108662467	RefSeqFE_enhancer_GeneID:112695112	UTR-overlapping,exon-overlapping,gene-overlapping	protein_coding_GeneID:3987_LIMS1	ENCODEcCRE,Ensembl104	NG_060889.1	Homo_sapiens
NC_000002.12	109267012	109267307	RefSeqFE_enhancer_GeneID:112695113	gene-overlapping,intronic	protein_coding_GeneID:344558_SH3RF3	ENCODEcCRE,Ensembl104,FANTOM5	NG_060890.1	Homo_sapiens
NC_000002.12	109290932	109291227	RefSeqFE_enhancer_GeneID:112695114	gene-overlapping,intronic	protein_coding_GeneID:344558_SH3RF3	ENCODEcCRE,Ensembl104	NG_060891.1	Homo_sapiens
NC_000002.12	109558611	109558906	RefSeqFE_enhancer_GeneID:112695115	gene-overlapping,intronic	protein_coding_GeneID:151011_SEPTIN10	ENCODEcCRE,Ensembl104,FANTOM5	NG_060892.1	Homo_sapiens
NC_000002.12	109869637	109869917	RefSeqFE_mobile_genetic_element_GeneID:107305686	gene-overlapping,intronic	lncRNA_GeneID:102724848_LOC102724848	.	NG_046766.1	Homo_sapiens
NC_000002.12	109869768	109870749	RefSeqFE_meiotic_recombination_region_GeneID:107305686	gene-overlapping,intronic	lncRNA_GeneID:102724848_LOC102724848	.	NG_046766.1	Homo_sapiens
NC_000002.12	109869867	109869901	RefSeqFE_non_allelic_homologous_recombination_region_GeneID:107305686	gene-overlapping,intronic	lncRNA_GeneID:102724848_LOC102724848	.	NG_046766.1	Homo_sapiens
NC_000002.12	111975191	111975486	RefSeqFE_enhancer_GeneID:112806037	CDS-overlapping,exon-overlapping,gene-overlapping	protein_coding_GeneID:10461_MERTK[ClinVar_submission_gene,RSG_gene]	ENCODEcCRE,Ensembl104	NG_060893.1	Homo_sapiens
NC_000002.12	112256774	112257026	RefSeqFE_transcriptional_cis_regulatory_region_GeneID:115945185	intergenic_gene_5prime-proximal	.	.	NG_066566.1	Homo_sapiens
NC_000002.12	112790291	112790586	RefSeqFE_enhancer_GeneID:112806038	intergenic_gene_5prime-distal	.	ENCODEcCRE,dbSUPER	NG_060894.1	Homo_sapiens
NC_000002.12	113088591	113088886	RefSeqFE_enhancer_GeneID:112806039	intergenic_gene_5prime-distal	.	Ensembl104,dbSUPER	NG_060895.1	Homo_sapiens
NC_000002.12	113278393	113279523	RefSeqFE_promoter_GeneID:108281110	gene-overlapping,intronic	protein_coding_GeneID:7849_PAX8[ClinVar_submission_gene,RSG_gene]	ENCODEcCRE	NG_051051.1	Homo_sapiens
NC_000002.12	117814452	117814747	RefSeqFE_enhancer_GeneID:112806040	UTR-overlapping,exon-overlapping,gene-overlapping	protein_coding_GeneID:8886_DDX18	ENCODEcCRE,Ensembl104	NG_060896.1	Homo_sapiens
NC_000002.12	118222032	118222327	RefSeqFE_enhancer_GeneID:112806041	gene-overlapping,intronic	lncRNA_GeneID:105373578_LOC105373578	ENCODEcCRE,Ensembl104	NG_060897.1	Homo_sapiens
NC_000002.12	118802933	118803512	RefSeqFE_transcriptional_cis_regulatory_region_GeneID:115945186	intergenic_gene_5prime-distal	.	ENCODEcCRE,Ensembl104	NG_066567.1	Homo_sapiens
NC_000002.12	119487056	119491464	RefSeqFE_enhancer_GeneID:110121228	gene-overlapping,intronic	protein_coding_GeneID:6344_SCTR[RSG_gene]	ENCODEcCRE,Ensembl104,VISTA,dbSUPER	NG_053843.1	Homo_sapiens
NC_000002.12	119759612	119759907	RefSeqFE_enhancer_GeneID:112806043	UTR-overlapping,exon-overlapping,gene-overlapping	lncRNA_GeneID:101927764_LOC101927764	ENCODEcCRE,Ensembl104	NG_060899.1	Homo_sapiens
NC_000002.12	120343287	120343778	RefSeqFE_transcriptional_cis_regulatory_region_GeneID:115945187	gene-overlapping,intronic	protein_coding_GeneID:105373989_LOC105373989	ENCODEcCRE,Ensembl104	NG_066568.1	Homo_sapiens
NC_000002.12	120603992	120604287	RefSeqFE_enhancer_GeneID:112806044	intergenic_gene_5prime-distal	.	ENCODEcCRE,Ensembl104	NG_060900.1	Homo_sapiens
NC_000002.12	121074841	121075741	RefSeqFE_enhancer_GeneID:110120692	intergenic_gene_5prime-distal	.	ENCODEcCRE,Ensembl104,VISTA	NG_053318.1	Homo_sapiens
NC_000002.12	121954543	121957677	RefSeqFE_enhancer_GeneID:110121302	gene-overlapping,intronic	lncRNA_GeneID:105373592_LOC105373592	ENCODEcCRE,VISTA	NG_053917.1	Homo_sapiens
NC_000002.12	126645120	126645784	RefSeqFE_transcriptional_cis_regulatory_region_GeneID:115945188	intergenic_gene_5prime-distal	.	ENCODEcCRE,Ensembl104,dbSUPER	NG_066569.1	Homo_sapiens
NC_000002.12	126651063	126651403	RefSeqFE_transcriptional_cis_regulatory_region_GeneID:115945190	intergenic_gene_5prime-distal	.	ENCODEcCRE,dbSUPER	NG_066570.1	Homo_sapiens
NC_000002.12	127064772	127065067	RefSeqFE_enhancer_GeneID:112806045	gene-overlapping,intronic	protein_coding_GeneID:274_BIN1[ClinVar_submission_gene,RSG_gene]	ENCODEcCRE,Ensembl104,dbSUPER	NG_060901.1	Homo_sapiens
NC_000002.12	128446474	128446769	RefSeqFE_enhancer_GeneID:112806046	gene-overlapping,intronic	lncRNA_GeneID:105373611_LOC105373611	ENCODEcCRE	NG_060902.1	Homo_sapiens
NC_000002.12	129877435	129877730	RefSeqFE_enhancer_GeneID:112806047	UTR-overlapping,exon-overlapping,gene-overlapping	lncRNA_GeneID:105373615_LINC02572	ENCODEcCRE,Ensembl104	NG_060903.1	Homo_sapiens
NC_000002.12	130687740	130688006	RefSeqFE_mobile_genetic_element_GeneID:108228197	intergenic_gene_5prime-distal	.	.	NG_050970.1	Homo_sapiens
NC_000002.12	130687766	130687779	RefSeqFE_nucleotide_motif_GeneID:108228197	intergenic_gene_5prime-distal	.	.	NG_050970.1	Homo_sapiens
NC_000002.12	130687800	130687981	RefSeqFE_non_allelic_homologous_recombination_region_GeneID:108228197	intergenic_gene_5prime-distal	.	.	NG_050970.1	Homo_sapiens
NC_000002.12	131294429	131294695	RefSeqFE_mobile_genetic_element_GeneID:108228198	gene-overlapping,intronic	lncRNA_GeneID:440910_LOC440910	.	NG_050971.1	Homo_sapiens
NC_000002.12	131294455	131294468	RefSeqFE_nucleotide_motif_GeneID:108228198	gene-overlapping,intronic	lncRNA_GeneID:440910_LOC440910	.	NG_050971.1	Homo_sapiens
NC_000002.12	131294489	131294670	RefSeqFE_non_allelic_homologous_recombination_region_GeneID:108228198	gene-overlapping,intronic	lncRNA_GeneID:440910_LOC440910	.	NG_050971.1	Homo_sapiens
NC_000002.12	131668895	131669203	RefSeqFE_transcriptional_cis_regulatory_region_GeneID:115945197	intergenic_gene_5prime-distal	.	ENCODEcCRE,Ensembl104,FANTOM5	NG_066571.1	Homo_sapiens
NC_000002.12	132416435	132416730	RefSeqFE_enhancer_GeneID:112806048	intergenic_gene_5prime-proximal	.	ENCODEcCRE,Ensembl104,dbSUPER	NG_060904.1	Homo_sapiens
NC_000002.12	132416435	132416730	RefSeqFE_silencer_GeneID:112806048	intergenic_gene_5prime-proximal	.	ENCODEcCRE,Ensembl104,dbSUPER	NG_060904.1	Homo_sapiens
NC_000002.12	132859635	132859930	RefSeqFE_enhancer_GeneID:112806050	gene-overlapping,intronic	protein_coding_GeneID:344148_NCKAP5	.	NG_060905.1	Homo_sapiens
NC_000002.12	133435249	133435756	RefSeqFE_enhancer_GeneID:108281157	gene-overlapping,intronic	protein_coding_GeneID:344148_NCKAP5	ENCODEcCRE,Ensembl104,FANTOM5	NG_051117.1	Homo_sapiens
NC_000002.12	133435458	133435544	RefSeqFE_CAGE_cluster_GeneID:108281157	gene-overlapping,intronic	protein_coding_GeneID:344148_NCKAP5	ENCODEcCRE,Ensembl104,FANTOM5	NG_051117.1	Homo_sapiens
NC_000002.12	135091811	135091956	RefSeqFE_enhancer_GeneID:111562379	gene-overlapping,intronic	protein_coding_GeneID:22930_RAB3GAP1[ClinVar_submission_gene,RSG_gene]	ENCODEcCRE,Ensembl104	NG_056074.1	Homo_sapiens
NC_000002.12	135091876	135091890	RefSeqFE_transcriptional_cis_regulatory_region_GeneID:111562379	gene-overlapping,intronic	protein_coding_GeneID:22930_RAB3GAP1[ClinVar_submission_gene,RSG_gene]	ENCODEcCRE,Ensembl104	NG_056074.1	Homo_sapiens
NC_000002.12	142869762	142869907	RefSeqFE_enhancer_GeneID:111556162	gene-overlapping,intronic	lncRNA_GeneID:105373652_LOC105373652	ENCODEcCRE,dbSUPER	NG_056064.1	Homo_sapiens
NC_000002.12	142869828	142869842	RefSeqFE_transcriptional_cis_regulatory_region_GeneID:111556162	gene-overlapping,intronic	lncRNA_GeneID:105373652_LOC105373652	ENCODEcCRE,dbSUPER	NG_056064.1	Homo_sapiens
NC_000002.12	143346312	143348075	RefSeqFE_enhancer_GeneID:110120740	gene-overlapping,intronic	protein_coding_GeneID:55843_ARHGAP15	Ensembl104,VISTA	NG_053365.1	Homo_sapiens
NC_000002.12	144404495	144404933	RefSeqFE_enhancer_GeneID:111721705	CDS-overlapping,exon-overlapping,gene-overlapping	protein_coding_GeneID:9839_ZEB2[ClinVar_submission_gene,RSG_gene]	ENCODEcCRE,Ensembl104,dbSUPER	NG_056148.1	Homo_sapiens
NC_000002.12	144427161	144427456	RefSeqFE_enhancer_GeneID:112806051	gene-overlapping,intronic	protein_coding_GeneID:9839_ZEB2[ClinVar_submission_gene,RSG_gene]	ENCODEcCRE,Ensembl104,dbSUPER	NG_060906.1	Homo_sapiens
NC_000002.12	144430531	144432245	RefSeqFE_enhancer_GeneID:110120671	gene-overlapping,intronic	protein_coding_GeneID:9839_ZEB2[ClinVar_submission_gene,RSG_gene]	ENCODEcCRE,Ensembl104,VISTA,dbSUPER	NG_053297.1	Homo_sapiens
NC_000002.12	144582034	144583963	RefSeqFE_enhancer_GeneID:110121209	intergenic_gene_5prime-distal	.	ENCODEcCRE,VISTA,dbSUPER	NG_053825.1	Homo_sapiens
NC_000002.12	144582586	144583250	RefSeqFE_transcriptional_cis_regulatory_region_GeneID:110121209	intergenic_gene_5prime-distal	.	ENCODEcCRE,VISTA,dbSUPER	NG_053825.1	Homo_sapiens
NC_000002.12	145931481	145932531	RefSeqFE_enhancer_GeneID:110120731	intergenic_gene_5prime-distal	.	ENCODEcCRE,Ensembl104,VISTA	NG_053356.1	Homo_sapiens
NC_000002.12	145934719	145935715	RefSeqFE_enhancer_GeneID:110120706	intergenic_gene_5prime-distal	.	ENCODEcCRE,Ensembl104,VISTA	NG_053332.1	Homo_sapiens
NC_000002.12	145952131	145953242	RefSeqFE_origin_of_replication_GeneID:107228318	intergenic_gene_5prime-distal	.	.	NG_046740.1	Homo_sapiens
NC_000002.12	145952145	145952597	RefSeqFE_origin_of_replication_GeneID:107228318	intergenic_gene_5prime-distal	.	.	NG_046740.1	Homo_sapiens
NC_000002.12	146414435	146416234	RefSeqFE_enhancer_GeneID:110120715	intergenic_gene_5prime-distal	.	Ensembl104,VISTA	NG_053340.1	Homo_sapiens
NC_000002.12	150326359	150328958	RefSeqFE_enhancer_GeneID:110121086	gene-overlapping,intronic	lncRNA_GeneID:105373684_LINC01818	ENCODEcCRE,Ensembl104,VISTA	NG_053706.1	Homo_sapiens
NC_000002.12	151760260	151760750	RefSeqFE_transcriptional_cis_regulatory_region_GeneID:115945200	intergenic_gene_5prime-distal	.	ENCODEcCRE,Ensembl104,dbSUPER	NG_066572.1	Homo_sapiens
NC_000002.12	151771272	151772273	RefSeqFE_enhancer_GeneID:108348024	intergenic_gene_5prime-distal	.	ENCODEcCRE,Ensembl104,dbSUPER	NG_051177.1	Homo_sapiens
NC_000002.12	151782654	151782949	RefSeqFE_enhancer_GeneID:112806054	UTR-overlapping,exon-overlapping,gene-overlapping	lncRNA_GeneID:101929356_LOC101929356	ENCODEcCRE,dbSUPER	NG_060907.1	Homo_sapiens
NC_000002.12	152405274	152405569	RefSeqFE_enhancer_GeneID:112806055	gene-overlapping,intronic	protein_coding_GeneID:114793_FMNL2[ClinVar_submission_gene]	ENCODEcCRE,FANTOM5,dbSUPER	NG_060908.1	Homo_sapiens
NC_000002.12	154450015	154450160	RefSeqFE_enhancer_GeneID:111556122	gene-overlapping,intronic	lncRNA_GeneID:100144595_LOC100144595,protein_coding_GeneID:114805_GALNT13	ENCODEcCRE,Ensembl104	NG_055959.1	Homo_sapiens
NC_000002.12	154450080	154450094	RefSeqFE_transcriptional_cis_regulatory_region_GeneID:111556122	gene-overlapping,intronic	lncRNA_GeneID:100144595_LOC100144595,protein_coding_GeneID:114805_GALNT13	ENCODEcCRE,Ensembl104	NG_055959.1	Homo_sapiens
NC_000002.12	155546509	155547603	RefSeqFE_enhancer_GeneID:110120710	gene-overlapping,intronic	lncRNA_GeneID:107985953_LOC107985953	ENCODEcCRE,Ensembl104,VISTA	NG_053335.1	Homo_sapiens
NC_000002.12	155870068	155871093	RefSeqFE_enhancer_GeneID:110120673	gene-overlapping,intronic	lncRNA_GeneID:105373703_LOC105373703	VISTA	NG_053299.1	Homo_sapiens
NC_000002.12	156694501	156695440	RefSeqFE_enhancer_GeneID:110120674	UTR-overlapping,exon-overlapping,gene-overlapping	lncRNA_GeneID:105373708_LINC01958	ENCODEcCRE,VISTA	NG_053300.1	Homo_sapiens
NC_000002.12	156864115	156865074	RefSeqFE_enhancer_GeneID:110120736	gene-overlapping,intronic	lncRNA_GeneID:107985955_LOC107985955	ENCODEcCRE,Ensembl104,VISTA	NG_053361.1	Homo_sapiens
NC_000002.12	157004588	157005897	RefSeqFE_enhancer_GeneID:110120708	gene-overlapping,intronic	lncRNA_GeneID:105373710_LOC105373710	ENCODEcCRE,VISTA	NG_053333.1	Homo_sapiens
NC_000002.12	157043279	157044209	RefSeqFE_enhancer_GeneID:110120675	gene-overlapping,intronic	lncRNA_GeneID:105373709_LOC105373709,lncRNA_GeneID:105373710_LOC105373710	Ensembl104,VISTA	NG_053301.1	Homo_sapiens
NC_000002.12	158922804	158923829	RefSeqFE_enhancer_GeneID:110121120	intergenic_gene_5prime-distal	.	ENCODEcCRE,Ensembl104,VISTA	NG_053739.1	Homo_sapiens
NC_000002.12	159029475	159032500	RefSeqFE_enhancer_GeneID:110121242	gene-overlapping,intronic	protein_coding_GeneID:85461_TANC1	ENCODEcCRE,VISTA,dbSUPER	NG_053857.1	Homo_sapiens
NC_000002.12	160227254	160227790	RefSeqFE_enhancer_GeneID:108281133	intergenic_gene_5prime-distal	.	ENCODEcCRE,Ensembl104,FANTOM5,dbSUPER	NG_051084.1	Homo_sapiens
NC_000002.12	160227404	160227728	RefSeqFE_CAGE_cluster_GeneID:108281133	intergenic_gene_5prime-distal	.	ENCODEcCRE,Ensembl104,FANTOM5,dbSUPER	NG_051084.1	Homo_sapiens
NC_000002.12	161085217	161085512	RefSeqFE_enhancer_GeneID:112806056	gene-overlapping,intronic	lncRNA_GeneID:105373719_TANK-AS1	Ensembl104,dbSUPER	NG_060909.1	Homo_sapiens
NC_000002.12	161238383	161238940	RefSeqFE_enhancer_GeneID:110120676	gene-overlapping,intronic	lncRNA_GeneID:101929512_LOC101929512	ENCODEcCRE,FANTOM5,VISTA	NG_053302.1	Homo_sapiens
NC_000002.12	161370303	161372949	RefSeqFE_enhancer_GeneID:114827830	gene-overlapping,intronic	protein_coding_GeneID:10213_PSMD14	ENCODEcCRE,Ensembl104,VISTA	NG_065186.1	Homo_sapiens
NC_000002.12	162074619	162076396	RefSeqFE_promoter_GeneID:117152610	gene-overlapping,intronic	lncRNA_GeneID:100131604_DPP4-DT	ENCODEcCRE,Ensembl104,FANTOM5,dbSUPER	NG_068153.1	Homo_sapiens
NC_000002.12	162075725	162075808	RefSeqFE_protein_binding_site_nuclear_receptor_subfamily_3_group_C_member_1_GeneID:117152610	gene-overlapping,intronic	lncRNA_GeneID:100131604_DPP4-DT	ENCODEcCRE,dbSUPER	NG_068153.1	Homo_sapiens
NC_000002.12	162075749	162075764	RefSeqFE_nucleotide_motif_GeneID:117152610	gene-overlapping,intronic	lncRNA_GeneID:100131604_DPP4-DT	dbSUPER	NG_068153.1	Homo_sapiens
NC_000002.12	162078686	162078798	RefSeqFE_protein_binding_site_nuclear_receptor_subfamily_3_group_C_member_1_GeneID:117152611	intergenic_gene_5prime-distal	.	dbSUPER	NG_068154.1	Homo_sapiens
NC_000002.12	162078725	162078740	RefSeqFE_nucleotide_motif_GeneID:117152611	intergenic_gene_5prime-distal	.	dbSUPER	NG_068154.1	Homo_sapiens
NC_000002.12	162152134	162153856	RefSeqFE_promoter_GeneID:108175345	gene-overlapping,intronic	lncRNA_GeneID:101929532_LOC101929532	ENCODEcCRE,Ensembl104	NG_050919.1	Homo_sapiens
NC_000002.12	162152284	162152313	RefSeqFE_protein_binding_site_forkhead_box_A1_GeneID:108175345	gene-overlapping,intronic	lncRNA_GeneID:101929532_LOC101929532	.	NG_050919.1	Homo_sapiens
NC_000002.12	162152316	162152353	RefSeqFE_protein_binding_site_paired_box_6_GeneID:108175345	gene-overlapping,intronic	lncRNA_GeneID:101929532_LOC101929532	.	NG_050919.1	Homo_sapiens
NC_000002.12	162152317	162152355	RefSeqFE_conserved_region_GeneID:108175345	gene-overlapping,intronic	lncRNA_GeneID:101929532_LOC101929532	.	NG_050919.1	Homo_sapiens
NC_000002.12	162152423	162152460	RefSeqFE_protein_binding_site_nuclear_factor_of_activated_T-cells_GeneID:108175345	gene-overlapping,intronic	lncRNA_GeneID:101929532_LOC101929532	.	NG_050919.1	Homo_sapiens
NC_000002.12	162152432	162152455	RefSeqFE_conserved_region_GeneID:108175345	gene-overlapping,intronic	lncRNA_GeneID:101929532_LOC101929532	.	NG_050919.1	Homo_sapiens
NC_000002.12	162152504	162152543	RefSeqFE_protein_binding_site_PBX/knotted_1_homeobox_1_PBX_homeobox_1_GeneID:108175345	gene-overlapping,intronic	lncRNA_GeneID:101929532_LOC101929532	.	NG_050919.1	Homo_sapiens
NC_000002.12	162152504	162152544	RefSeqFE_protein_binding_site_paired_box_6_GeneID:108175345	gene-overlapping,intronic	lncRNA_GeneID:101929532_LOC101929532	.	NG_050919.1	Homo_sapiens
NC_000002.12	162152507	162152540	RefSeqFE_conserved_region_GeneID:108175345	gene-overlapping,intronic	lncRNA_GeneID:101929532_LOC101929532	.	NG_050919.1	Homo_sapiens
NC_000002.12	162152550	162152577	RefSeqFE_protein_binding_site_cAMP_responsive_element_binding_protein_1_GeneID:108175345	gene-overlapping,intronic	lncRNA_GeneID:101929532_LOC101929532	.	NG_050919.1	Homo_sapiens
NC_000002.12	163593633	163595248	RefSeqFE_enhancer_GeneID:110120601	intergenic_gene_5prime-distal	.	ENCODEcCRE,Ensembl104,VISTA	NG_053229.1	Homo_sapiens
NC_000002.12	163717496	163718948	RefSeqFE_enhancer_GeneID:110120725	gene-overlapping,intronic	protein_coding_GeneID:55137_FIGN	ENCODEcCRE,Ensembl104,VISTA,dbSUPER	NG_053350.1	Homo_sapiens
NC_000002.12	163987286	163988273	RefSeqFE_enhancer_GeneID:110120677	intergenic_gene_5prime-distal	.	VISTA	NG_053303.1	Homo_sapiens
NC_000002.12	164514518	164514813	RefSeqFE_enhancer_GeneID:112806057	gene-overlapping,intronic	protein_coding_GeneID:2888_GRB14[ClinVar_submission_gene,RSG_gene]	ENCODEcCRE,Ensembl104,FANTOM5	NG_060910.1	Homo_sapiens
NC_000002.12	164711783	164711928	RefSeqFE_enhancer_GeneID:111413009	gene-overlapping,intronic	protein_coding_GeneID:22837_COBLL1	ENCODEcCRE,dbSUPER	NG_055842.1	Homo_sapiens
NC_000002.12	164711848	164711862	RefSeqFE_transcriptional_cis_regulatory_region_GeneID:111413009	gene-overlapping,intronic	protein_coding_GeneID:22837_COBLL1	ENCODEcCRE,dbSUPER	NG_055842.1	Homo_sapiens
NC_000002.12	170013096	170014655	RefSeqFE_enhancer_GeneID:110121216	gene-overlapping,intronic	protein_coding_GeneID:130507_UBR3	ENCODEcCRE,Ensembl104,VISTA	NG_053832.1	Homo_sapiens
NC_000002.12	170362898	170363193	RefSeqFE_enhancer_GeneID:112806058	gene-overlapping,intronic	protein_coding_GeneID:140469_MYO3B[ClinVar_submission_gene,RSG_gene]	ENCODEcCRE,Ensembl104	NG_060911.1	Homo_sapiens
NC_000002.12	171513678	171514152	RefSeqFE_transcriptional_cis_regulatory_region_GeneID:115945201	intergenic_gene_5prime-distal	.	ENCODEcCRE,Ensembl104	NG_066573.1	Homo_sapiens
NC_000002.12	171963842	171964792	RefSeqFE_enhancer_GeneID:110120730	gene-overlapping,intronic	protein_coding_GeneID:8520_HAT1	VISTA	NG_053355.1	Homo_sapiens
NC_000002.12	172071790	172073521	RefSeqFE_enhancer_GeneID:110120701	gene-overlapping,intronic	protein_coding_GeneID:254042_METAP1D	ENCODEcCRE,Ensembl104,VISTA,dbSUPER	NG_053327.1	Homo_sapiens
NC_000002.12	172091150	172092324	RefSeqFE_enhancer_GeneID:110120678	intergenic_gene_5prime-distal	.	ENCODEcCRE,Ensembl104,VISTA,dbSUPER	NG_053304.1	Homo_sapiens
NC_000002.12	172552820	172553115	RefSeqFE_enhancer_GeneID:112806059	intergenic_gene_5prime-distal	.	ENCODEcCRE	NG_060912.1	Homo_sapiens
NC_000002.12	172552820	172553115	RefSeqFE_silencer_GeneID:112806059	intergenic_gene_5prime-distal	.	ENCODEcCRE	NG_060912.1	Homo_sapiens
NC_000002.12	173249642	173251205	RefSeqFE_enhancer_GeneID:110120624	gene-overlapping,intronic	lncRNA_GeneID:339751_MAP3K20-AS1[ClinVar_submission_gene,RSG_gene],protein_coding_GeneID:51776_MAP3K20[ClinVar_submission_gene,RSG_gene]	ENCODEcCRE,Ensembl104,VISTA	NG_053251.1	Homo_sapiens
NC_000002.12	174039920	174040215	RefSeqFE_enhancer_GeneID:112806060	intergenic_gene_5prime-distal	.	ENCODEcCRE,Ensembl104,dbSUPER	NG_060913.1	Homo_sapiens
NC_000002.12	174120815	174122736	RefSeqFE_enhancer_GeneID:110120625	gene-overlapping,intronic	protein_coding_GeneID:29789_OLA1[ClinVar_submission_gene,RSG_gene]	ENCODEcCRE,Ensembl104,VISTA	NG_053252.1	Homo_sapiens
NC_000002.12	174124008	174125635	RefSeqFE_enhancer_GeneID:110120626	gene-overlapping,intronic	protein_coding_GeneID:29789_OLA1[ClinVar_submission_gene,RSG_gene]	ENCODEcCRE,Ensembl104,VISTA	NG_053253.1	Homo_sapiens
NC_000002.12	174331314	174332386	RefSeqFE_enhancer_GeneID:110120790	gene-overlapping,intronic	lncRNA_GeneID:102724194_LOC102724194	ENCODEcCRE,Ensembl104,VISTA	NG_053415.1	Homo_sapiens
NC_000002.12	174338534	174340167	RefSeqFE_enhancer_GeneID:110120809	intergenic_gene_5prime-distal	.	ENCODEcCRE,Ensembl104,VISTA	NG_053434.1	Homo_sapiens
NC_000002.12	176075341	176076682	RefSeqFE_enhancer_GeneID:110120627	intergenic_gene_5prime-distal	.	ENCODEcCRE,Ensembl104,VISTA	NG_053254.1	Homo_sapiens
NC_000002.12	176084884	176084994	RefSeqFE_mitotic_recombination_region_GeneID:107126359	intergenic_gene_5prime-proximal	.	ENCODEcCRE,Ensembl104	NG_046630.1	Homo_sapiens
NC_000002.12	176638428	176638943	RefSeqFE_enhancer_GeneID:110120628	gene-overlapping,intronic	lncRNA_GeneID:102724224_LINC01117	ENCODEcCRE,Ensembl104,VISTA	NG_053255.1	Homo_sapiens
NC_000002.12	177168320	177168615	RefSeqFE_enhancer_GeneID:112806061	intergenic_gene_5prime-distal	.	ENCODEcCRE,Ensembl104,dbSUPER	NG_060914.1	Homo_sapiens
NC_000002.12	177906121	177906416	RefSeqFE_enhancer_GeneID:112806062	gene-overlapping,intronic	protein_coding_GeneID:50940_PDE11A[ClinVar_submission_gene,RSG_gene]	ENCODEcCRE,Ensembl104	NG_060915.1	Homo_sapiens
NC_000002.12	181810861	181811156	RefSeqFE_enhancer_GeneID:112806063	intergenic_gene_5prime-distal	.	ENCODEcCRE,FANTOM5,dbSUPER	NG_060916.1	Homo_sapiens
NC_000002.12	181876535	181877122	RefSeqFE_enhancer_GeneID:108281145	intergenic_gene_5prime-distal	.	ENCODEcCRE,Ensembl104,FANTOM5,dbSUPER	NG_051101.1	Homo_sapiens
NC_000002.12	181876657	181877119	RefSeqFE_CAGE_cluster_GeneID:108281145	intergenic_gene_5prime-distal	.	ENCODEcCRE,Ensembl104,FANTOM5,dbSUPER	NG_051101.1	Homo_sapiens
NC_000002.12	188298941	188299236	RefSeqFE_enhancer_GeneID:112806064	gene-overlapping,intronic	protein_coding_GeneID:51454_GULP1	ENCODEcCRE,Ensembl104,dbSUPER	NG_060917.1	Homo_sapiens
NC_000002.12	190277622	190277917	RefSeqFE_enhancer_GeneID:112806065	gene-overlapping,intronic	protein_coding_GeneID:26275_HIBCH[ClinVar_submission_gene,RSG_gene]	ENCODEcCRE,Ensembl104	NG_060918.1	Homo_sapiens
NC_000002.12	190781663	190782027	RefSeqFE_transcriptional_cis_regulatory_region_GeneID:115945202	intergenic_gene_5prime-distal	.	ENCODEcCRE,Ensembl104	NG_066574.1	Homo_sapiens
NC_000002.12	191377282	191377577	RefSeqFE_enhancer_GeneID:112806066	gene-overlapping,intronic	protein_coding_GeneID:4430_MYO1B	ENCODEcCRE,Ensembl104,dbSUPER	NG_060919.1	Homo_sapiens
NC_000002.12	191597194	191597646	RefSeqFE_transcriptional_cis_regulatory_region_GeneID:115947632	intergenic_gene_5prime-distal	.	ENCODEcCRE,Ensembl104	NG_066575.1	Homo_sapiens
NC_000002.12	191867022	191867317	RefSeqFE_enhancer_GeneID:112806067	intergenic_gene_5prime-distal	.	ENCODEcCRE,dbSUPER	NG_060920.1	Homo_sapiens
NC_000002.12	191869262	191869557	RefSeqFE_enhancer_GeneID:112806068	intergenic_gene_5prime-distal	.	ENCODEcCRE,Ensembl104,dbSUPER	NG_060921.1	Homo_sapiens
NC_000002.12	195695184	195695479	RefSeqFE_enhancer_GeneID:112806069	gene-overlapping,intronic	protein_coding_GeneID:57181_SLC39A10	ENCODEcCRE,Ensembl104	NG_060922.1	Homo_sapiens
NC_000002.12	196400204	196400499	RefSeqFE_enhancer_GeneID:112806070	gene-overlapping,intronic	protein_coding_GeneID:57520_HECW2[ClinVar_submission_gene,RSG_gene]	ENCODEcCRE,Ensembl104,FANTOM5,dbSUPER	NG_060923.1	Homo_sapiens
NC_000002.12	197847269	197848582	RefSeqFE_enhancer_GeneID:108353821	gene-overlapping,intronic	protein_coding_GeneID:5334_PLCL1	ENCODEcCRE,dbSUPER	NG_051217.1	Homo_sapiens
NC_000002.12	197929344	197929639	RefSeqFE_enhancer_GeneID:112806071	gene-overlapping,intronic	protein_coding_GeneID:5334_PLCL1	ENCODEcCRE,Ensembl104,dbSUPER	NG_060924.1	Homo_sapiens
NC_000002.12	199459525	199459820	RefSeqFE_enhancer_GeneID:112806073	gene-overlapping,intronic	protein_coding_GeneID:23314_SATB2[ClinVar_submission_gene,RSG_gene]	ENCODEcCRE,Ensembl104,dbSUPER	NG_060926.1	Homo_sapiens
NC_000002.12	200787308	200787825	RefSeqFE_enhancer_GeneID:108281167	gene-overlapping,intronic	lncRNA_GeneID:101927795_BZW1-AS1,pseudogene_GeneID:344454_AOX2P,transcribed_pseudogene_GeneID:107161151_AOX3P-AOX2P	ENCODEcCRE,Ensembl104,FANTOM5,dbSUPER	NG_051127.1	Homo_sapiens
NC_000002.12	200787478	200787672	RefSeqFE_CAGE_cluster_GeneID:108281167	gene-overlapping,intronic	lncRNA_GeneID:101927795_BZW1-AS1,pseudogene_GeneID:344454_AOX2P,transcribed_pseudogene_GeneID:107161151_AOX3P-AOX2P	ENCODEcCRE,Ensembl104,FANTOM5,dbSUPER	NG_051127.1	Homo_sapiens
NC_000002.12	205734464	205734759	RefSeqFE_enhancer_GeneID:112806074	gene-overlapping,intronic	protein_coding_GeneID:8828_NRP2[ClinVar_submission_gene,RSG_gene]	ENCODEcCRE,Ensembl104,dbSUPER	NG_060927.1	Homo_sapiens
NC_000002.12	207845354	207845499	RefSeqFE_enhancer_GeneID:111413021	gene-overlapping,intronic	protein_coding_GeneID:389072_PLEKHM3	ENCODEcCRE,Ensembl104,dbSUPER	NG_055853.1	Homo_sapiens
NC_000002.12	207845419	207845433	RefSeqFE_transcriptional_cis_regulatory_region_GeneID:111413021	gene-overlapping,intronic	protein_coding_GeneID:389072_PLEKHM3	ENCODEcCRE,Ensembl104,dbSUPER	NG_055853.1	Homo_sapiens
NC_000002.12	210548855	210549351	RefSeqFE_enhancer_GeneID:108254675	UTR-overlapping,exon-overlapping,gene-overlapping	protein_coding_GeneID:1373_CPS1[ClinVar_submission_gene,LRG_gene,RSG_gene]	ENCODEcCRE,Ensembl104,FANTOM5,dbSUPER	NG_051021.1	Homo_sapiens
NC_000002.12	210548935	210549284	RefSeqFE_CAGE_cluster_GeneID:108254675	UTR-overlapping,exon-overlapping,gene-overlapping	protein_coding_GeneID:1373_CPS1[ClinVar_submission_gene,LRG_gene,RSG_gene]	ENCODEcCRE,Ensembl104,FANTOM5,dbSUPER	NG_051021.1	Homo_sapiens
NC_000002.12	210559188	210559782	RefSeqFE_enhancer_GeneID:108178994	gene-overlapping,intronic	protein_coding_GeneID:1373_CPS1[ClinVar_submission_gene,LRG_gene,RSG_gene]	ENCODEcCRE,FANTOM5,dbSUPER	NG_050955.1	Homo_sapiens
NC_000002.12	210559268	210559642	RefSeqFE_CAGE_cluster_GeneID:108178994	gene-overlapping,intronic	protein_coding_GeneID:1373_CPS1[ClinVar_submission_gene,LRG_gene,RSG_gene]	ENCODEcCRE,FANTOM5,dbSUPER	NG_050955.1	Homo_sapiens
NC_000002.12	211390114	211392433	RefSeqFE_enhancer_GeneID:110121148	gene-overlapping,intronic	protein_coding_GeneID:2066_ERBB4[ClinVar_submission_gene,RSG_gene]	ENCODEcCRE,Ensembl104,VISTA	NG_053766.1	Homo_sapiens
NC_000002.12	215620085	215620380	RefSeqFE_enhancer_GeneID:112806075	gene-overlapping,intronic	lncRNA_GeneID:102724861_LOC102724861,lncRNA_GeneID:646324_LINC00607	ENCODEcCRE	NG_060928.1	Homo_sapiens
NC_000002.12	215772045	215772340	RefSeqFE_enhancer_GeneID:112806076	gene-overlapping,intronic	lncRNA_GeneID:646324_LINC00607	ENCODEcCRE,Ensembl104,FANTOM5,dbSUPER	NG_060929.1	Homo_sapiens
NC_000002.12	216114705	216115000	RefSeqFE_enhancer_GeneID:111828511	gene-overlapping,intronic	protein_coding_GeneID:7520_XRCC5[RSG_gene]	ENCODEcCRE,Ensembl104,dbSUPER	NG_056239.1	Homo_sapiens
NC_000002.12	216114725	216115020	RefSeqFE_enhancer_GeneID:111828511	gene-overlapping,intronic	protein_coding_GeneID:7520_XRCC5[RSG_gene]	ENCODEcCRE,Ensembl104,dbSUPER	NG_056239.1	Homo_sapiens
NC_000002.12	216412245	216412540	RefSeqFE_enhancer_GeneID:112806077	UTR-overlapping,exon-overlapping,gene-overlapping	lncRNA_GeneID:107985985_SMARCAL1-AS1[ClinVar_submission_gene,LRG_gene,RSG_gene],protein_coding_GeneID:50485_SMARCAL1[ClinVar_submission_gene,LRG_gene,RSG_gene]	ENCODEcCRE,Ensembl104	NG_060930.1	Homo_sapiens
NC_000002.12	216909485	216909780	RefSeqFE_silencer_GeneID:114004367	gene-overlapping,intronic	lncRNA_GeneID:101928278_LOC101928278	.	NG_063786.1	Homo_sapiens
NC_000002.12	217331685	217331980	RefSeqFE_enhancer_GeneID:112806078	gene-overlapping,intronic	lncRNA_GeneID:105373877_DIRC3-AS1,lncRNA_GeneID:729582_DIRC3	ENCODEcCRE,Ensembl104,FANTOM5,dbSUPER	NG_060931.1	Homo_sapiens
NC_000002.12	217785445	217785740	RefSeqFE_enhancer_GeneID:112806079	intergenic_gene_5prime-distal	.	ENCODEcCRE,Ensembl104,dbSUPER	NG_060932.1	Homo_sapiens
NC_000002.12	217936447	217938840	RefSeqFE_enhancer_GeneID:110121204	gene-overlapping,intronic	protein_coding_GeneID:7145_TNS1	ENCODEcCRE,Ensembl104,VISTA,dbSUPER	NG_053821.1	Homo_sapiens
NC_000002.12	219399708	219418413	RefSeqFE_locus_control_region_GeneID:106866982	gene-overlapping,intronic	lncRNA_GeneID:105373884_LOC105373884	ENCODEcCRE,Ensembl104,FANTOM5,VISTA,dbSUPER	NG_046330.1	Homo_sapiens
NC_000002.12	219400406	219401017	RefSeqFE_DNAseI_hypersensitive_site_GeneID:106866982	gene-overlapping,intronic	lncRNA_GeneID:105373884_LOC105373884	ENCODEcCRE,dbSUPER	NG_046330.1	Homo_sapiens
NC_000002.12	219402365	219403748	RefSeqFE_DNAseI_hypersensitive_site_GeneID:106866982	UTR-overlapping,exon-overlapping,gene-overlapping	lncRNA_GeneID:105373884_LOC105373884	ENCODEcCRE,Ensembl104,dbSUPER	NG_046330.1	Homo_sapiens
NC_000002.12	219404427	219405001	RefSeqFE_DNAseI_hypersensitive_site_GeneID:106866982	intergenic_gene_5prime-distal	.	ENCODEcCRE,Ensembl104,dbSUPER	NG_046330.1	Homo_sapiens
NC_000002.12	219405051	219405766	RefSeqFE_DNAseI_hypersensitive_site_GeneID:106866982	intergenic_gene_5prime-distal	.	ENCODEcCRE,Ensembl104,dbSUPER	NG_046330.1	Homo_sapiens
NC_000002.12	219406812	219407407	RefSeqFE_DNAseI_hypersensitive_site_GeneID:106866982	intergenic_gene_5prime-distal	.	ENCODEcCRE,VISTA,dbSUPER	NG_046330.1	Homo_sapiens
NC_000002.12	219408207	219408962	RefSeqFE_DNAseI_hypersensitive_site_GeneID:106866982	intergenic_gene_5prime-distal	.	ENCODEcCRE,dbSUPER	NG_046330.1	Homo_sapiens
NC_000002.12	219417395	219417514	RefSeqFE_enhancer_GeneID:106866982	intergenic_gene_5prime-proximal	.	ENCODEcCRE,dbSUPER	NG_046330.1	Homo_sapiens
NC_000002.12	219417395	219417671	RefSeqFE_enhancer_GeneID:106866982	intergenic_gene_5prime-proximal	.	ENCODEcCRE,dbSUPER	NG_046330.1	Homo_sapiens
NC_000002.12	219417395	219418452	RefSeqFE_transcriptional_cis_regulatory_region_GeneID:106866982	intergenic_gene_5prime-proximal	.	ENCODEcCRE,Ensembl104,dbSUPER	NG_046330.1	Homo_sapiens
NC_000002.12	219417441	219417470	RefSeqFE_protein_binding_site_myocyte_enhancer_factor_2A_GeneID:106866982	intergenic_gene_5prime-proximal	.	ENCODEcCRE,dbSUPER	NG_046330.1	Homo_sapiens
NC_000002.12	219417468	219417475	RefSeqFE_transcriptional_cis_regulatory_region_GeneID:106866982	intergenic_gene_5prime-proximal	.	ENCODEcCRE,dbSUPER	NG_046330.1	Homo_sapiens
NC_000002.12	219417474	219417498	RefSeqFE_protein_binding_site_myogenic_differentiation_1_GeneID:106866982	intergenic_gene_5prime-proximal	.	ENCODEcCRE,dbSUPER	NG_046330.1	Homo_sapiens
NC_000002.12	219417514	219417671	RefSeqFE_enhancer_GeneID:106866982	intergenic_gene_5prime-proximal	.	ENCODEcCRE,dbSUPER	NG_046330.1	Homo_sapiens
NC_000002.12	219417546	219417568	RefSeqFE_protein_binding_site_early_growth_response_1_or_2_GeneID:106866982	intergenic_gene_5prime-proximal	.	ENCODEcCRE,dbSUPER	NG_046330.1	Homo_sapiens
NC_000002.12	219417576	219417603	RefSeqFE_protein_binding_site_early_growth_response_1_or_2_and_Sp1_transcription_factor_GeneID:106866982	intergenic_gene_5prime-proximal	.	ENCODEcCRE,dbSUPER	NG_046330.1	Homo_sapiens
NC_000002.12	219417628	219417649	RefSeqFE_protein_binding_site_early_growth_response_1_or_2_GeneID:106866982	intergenic_gene_5prime-proximal	.	ENCODEcCRE,dbSUPER	NG_046330.1	Homo_sapiens
NC_000002.12	219417671	219418147	RefSeqFE_silencer_GeneID:106866982	intergenic_gene_5prime-proximal	.	ENCODEcCRE,Ensembl104,dbSUPER	NG_046330.1	Homo_sapiens
NC_000002.12	219418147	219418452	RefSeqFE_promoter_GeneID:106866982	UTR-overlapping,exon-overlapping,gene-overlapping	protein_coding_GeneID:1674_DES[ClinVar_submission_gene,LRG_gene,RSG_gene]	ENCODEcCRE,Ensembl104,dbSUPER	NG_046330.1	Homo_sapiens
NC_000002.12	219429149	219432239	RefSeqFE_enhancer_GeneID:110121267	intergenic_gene_5prime-distal	.	ENCODEcCRE,Ensembl104,VISTA,dbSUPER	NG_053882.1	Homo_sapiens
NC_000002.12	219510203	219510348	RefSeqFE_enhancer_GeneID:111501760	gene-overlapping,intronic	lncRNA_GeneID:105373885_ASIC4-AS1	ENCODEcCRE,Ensembl104	NG_055930.1	Homo_sapiens
NC_000002.12	219510266	219510284	RefSeqFE_transcriptional_cis_regulatory_region_GeneID:111501760	gene-overlapping,intronic	lncRNA_GeneID:105373885_ASIC4-AS1	ENCODEcCRE,Ensembl104	NG_055930.1	Homo_sapiens
NC_000002.12	219572006	219572301	RefSeqFE_enhancer_GeneID:112806080	intergenic_gene_5prime-proximal	.	ENCODEcCRE,Ensembl104	NG_060933.1	Homo_sapiens
NC_000002.12	219662026	219662194	RefSeqFE_transcriptional_cis_regulatory_region_GeneID:115947633	intergenic_gene_5prime-distal	.	ENCODEcCRE,Ensembl104	NG_066576.1	Homo_sapiens
NC_000002.12	219684686	219684981	RefSeqFE_enhancer_GeneID:112806081	UTR-overlapping,exon-overlapping,gene-overlapping	pseudogene_GeneID:101059990_DNAJB6P3	ENCODEcCRE,Ensembl104,dbSUPER	NG_060934.1	Homo_sapiens
NC_000002.12	219849146	219852579	RefSeqFE_enhancer_GeneID:110121128	intergenic_gene_5prime-distal	.	ENCODEcCRE,Ensembl104,FANTOM5,VISTA	NG_053747.1	Homo_sapiens
NC_000002.12	219906363	219908558	RefSeqFE_enhancer_GeneID:110121169	gene-overlapping,intronic	lncRNA_GeneID:105373890_LOC105373890	ENCODEcCRE,VISTA	NG_053787.1	Homo_sapiens
NC_000002.12	222298597	222299629	RefSeqFE_promoter_GeneID:107980445	UTR-overlapping,exon-overlapping,gene-overlapping	lncRNA_GeneID:151278_CCDC140[ClinVar_submission_gene,RSG_gene],protein_coding_GeneID:5077_PAX3[ClinVar_submission_gene,RSG_gene]	ENCODEcCRE,Ensembl104	NG_050755.1	Homo_sapiens
NC_000002.12	222299015	222299053	RefSeqFE_transcriptional_cis_regulatory_region_GeneID:107980445	gene-overlapping,intronic	lncRNA_GeneID:151278_CCDC140[RSG_gene]	ENCODEcCRE,Ensembl104	NG_050755.1	Homo_sapiens
NC_000002.12	222299018	222299026	RefSeqFE_TATA_box_GeneID:107980445	gene-overlapping,intronic	lncRNA_GeneID:151278_CCDC140[RSG_gene]	ENCODEcCRE,Ensembl104	NG_050755.1	Homo_sapiens
NC_000002.12	222299623	222300178	RefSeqFE_transcriptional_cis_regulatory_region_GeneID:107980445	gene-overlapping,intronic	lncRNA_GeneID:151278_CCDC140[RSG_gene]	ENCODEcCRE,Ensembl104	NG_050755.1	Homo_sapiens
NC_000002.12	222299894	222300070	RefSeqFE_conserved_region_GeneID:107980445	gene-overlapping,intronic	lncRNA_GeneID:151278_CCDC140[RSG_gene]	ENCODEcCRE	NG_050755.1	Homo_sapiens
NC_000002.12	222300222	222300448	RefSeqFE_conserved_region_GeneID:107980445	gene-overlapping,intronic	lncRNA_GeneID:151278_CCDC140[RSG_gene]	ENCODEcCRE,Ensembl104	NG_050755.1	Homo_sapiens
NC_000002.12	222709289	222709584	RefSeqFE_enhancer_GeneID:111828512	gene-overlapping,intronic	protein_coding_GeneID:116255_MOGAT1	ENCODEcCRE	NG_056240.1	Homo_sapiens
NC_000002.12	222860750	222861045	RefSeqFE_enhancer_GeneID:112840900	intergenic_gene_5prime-proximal	.	ENCODEcCRE,Ensembl104	NG_060935.1	Homo_sapiens
NC_000002.12	223563530	223563825	RefSeqFE_enhancer_GeneID:112840901	intergenic_gene_5prime-distal	.	ENCODEcCRE,Ensembl104,FANTOM5,dbSUPER	NG_060936.1	Homo_sapiens
NC_000002.12	223613050	223613345	RefSeqFE_enhancer_GeneID:112840902	intergenic_gene_5prime-distal	.	ENCODEcCRE,FANTOM5,dbSUPER	NG_060937.1	Homo_sapiens
NC_000002.12	223699631	223699926	RefSeqFE_enhancer_GeneID:112840903	intergenic_gene_5prime-distal	.	ENCODEcCRE,Ensembl104,FANTOM5,dbSUPER	NG_060938.1	Homo_sapiens
NC_000002.12	224039451	224039746	RefSeqFE_silencer_GeneID:114004368	intergenic_gene_5prime-proximal	.	ENCODEcCRE,Ensembl104	NG_063787.1	Homo_sapiens
NC_000002.12	226115132	226115427	RefSeqFE_enhancer_GeneID:112840904	intergenic_gene_5prime-distal	.	ENCODEcCRE,FANTOM5,dbSUPER	NG_060939.1	Homo_sapiens
NC_000002.12	226159932	226160227	RefSeqFE_enhancer_GeneID:112840905	gene-overlapping,intronic	lncRNA_GeneID:646736_LOC646736	ENCODEcCRE,Ensembl104,dbSUPER	NG_060940.1	Homo_sapiens
NC_000002.12	226650132	226650427	RefSeqFE_enhancer_GeneID:112840906	intergenic_gene_5prime-distal	.	ENCODEcCRE,dbSUPER	NG_060941.1	Homo_sapiens
NC_000002.12	229330627	229331708	RefSeqFE_enhancer_GeneID:108353814	intergenic_gene_5prime-distal	.	ENCODEcCRE,FANTOM5,dbSUPER	NG_051204.1	Homo_sapiens
NC_000002.12	229408023	229409044	RefSeqFE_enhancer_GeneID:108353815	gene-overlapping,intronic	lncRNA_GeneID:107985994_LOC107985994,protein_coding_GeneID:92737_DNER	ENCODEcCRE,Ensembl104,FANTOM5,dbSUPER	NG_051205.1	Homo_sapiens
NC_000002.12	230658623	230659752	RefSeqFE_transcriptional_cis_regulatory_region_GeneID:115947634	intergenic_gene_5prime-distal	.	ENCODEcCRE,FANTOM5,dbSUPER	NG_066577.1	Homo_sapiens
NC_000002.12	231455117	231455412	RefSeqFE_silencer_GeneID:114004369	CDS-overlapping,exon-overlapping,gene-overlapping	protein_coding_GeneID:4691_NCL	.	NG_063788.1	Homo_sapiens
NC_000002.12	231662317	231662612	RefSeqFE_enhancer_GeneID:108348027	intergenic_gene_5prime-distal	.	ENCODEcCRE,FANTOM5,VISTA,dbSUPER	NG_051185.2	Homo_sapiens
NC_000002.12	231662544	231667398	RefSeqFE_enhancer_GeneID:108348027	intergenic_gene_5prime-distal	.	ENCODEcCRE,FANTOM5,VISTA,dbSUPER	NG_051185.2	Homo_sapiens
NC_000002.12	231665890	231667098	RefSeqFE_enhancer_GeneID:108348027	intergenic_gene_5prime-distal	.	ENCODEcCRE,FANTOM5,VISTA,dbSUPER	NG_051185.2	Homo_sapiens
NC_000002.12	231666897	231667192	RefSeqFE_enhancer_GeneID:108348027	intergenic_gene_5prime-distal	.	ENCODEcCRE,FANTOM5,VISTA,dbSUPER	NG_051185.2	Homo_sapiens
NC_000002.12	231672135	231673248	RefSeqFE_enhancer_GeneID:108348027	intergenic_gene_5prime-distal	.	ENCODEcCRE,Ensembl104,FANTOM5,dbSUPER	NG_051185.2	Homo_sapiens
NC_000002.12	231749958	231750253	RefSeqFE_enhancer_GeneID:112840908	gene-overlapping,intronic	protein_coding_GeneID:5147_PDE6D[ClinVar_submission_gene,RSG_gene]	ENCODEcCRE,Ensembl104	NG_060943.1	Homo_sapiens
NC_000002.12	233426702	233426997	RefSeqFE_enhancer_GeneID:112840909	gene-overlapping,intronic	protein_coding_GeneID:8527_DGKD[ClinVar_submission_gene,RSG_gene]	ENCODEcCRE,dbSUPER	NG_060944.1	Homo_sapiens
NC_000002.12	234513222	234513772	RefSeqFE_transcriptional_cis_regulatory_region_GeneID:115947635	intergenic_gene_5prime-distal	.	ENCODEcCRE,Ensembl104	NG_066578.1	Homo_sapiens
NC_000002.12	234863404	234863699	RefSeqFE_enhancer_GeneID:112840910	gene-overlapping,intronic	lncRNA_GeneID:101927896_LOC101927896	ENCODEcCRE,Ensembl104	NG_060945.1	Homo_sapiens
NC_000002.12	235460433	235461258	RefSeqFE_transcriptional_cis_regulatory_region_GeneID:115947636	intergenic_gene_5prime-distal	.	ENCODEcCRE,Ensembl104	NG_066579.1	Homo_sapiens
NC_000002.12	235595484	235595779	RefSeqFE_enhancer_GeneID:112840911	gene-overlapping,intronic	protein_coding_GeneID:116987_AGAP1[RSG_gene]	ENCODEcCRE,Ensembl104,dbSUPER	NG_060946.1	Homo_sapiens
NC_000002.12	235864813	235866052	RefSeqFE_enhancer_GeneID:110120691	gene-overlapping,intronic	protein_coding_GeneID:116987_AGAP1[RSG_gene]	ENCODEcCRE,VISTA	NG_053317.1	Homo_sapiens
NC_000002.12	236001524	236001819	RefSeqFE_enhancer_GeneID:112840912	gene-overlapping,intronic	protein_coding_GeneID:116987_AGAP1[RSG_gene]	ENCODEcCRE,Ensembl104,FANTOM5	NG_060947.1	Homo_sapiens
NC_000002.12	236053954	236056213	RefSeqFE_enhancer_GeneID:110120803	gene-overlapping,intronic	protein_coding_GeneID:116987_AGAP1[RSG_gene]	ENCODEcCRE,Ensembl104,VISTA	NG_053428.1	Homo_sapiens
NC_000002.12	236162719	236163204	RefSeqFE_enhancer_GeneID:110120629	gene-overlapping,intronic	protein_coding_GeneID:105373944_LOC105373944	ENCODEcCRE,Ensembl104,VISTA	NG_053256.1	Homo_sapiens
NC_000002.12	236968105	236968400	RefSeqFE_enhancer_GeneID:112840913	gene-overlapping,intronic	lncRNA_GeneID:105373951_LOC105373951	ENCODEcCRE,FANTOM5,dbSUPER	NG_060948.1	Homo_sapiens
NC_000002.12	236968105	236968400	RefSeqFE_silencer_GeneID:112840913	gene-overlapping,intronic	lncRNA_GeneID:105373951_LOC105373951	ENCODEcCRE,FANTOM5,dbSUPER	NG_060948.1	Homo_sapiens
NC_000002.12	237313176	237316630	RefSeqFE_enhancer_GeneID:110121230	intergenic_gene_5prime-distal	.	ENCODEcCRE,Ensembl104,FANTOM5,VISTA,dbSUPER	NG_053845.1	Homo_sapiens
NC_000002.12	237613735	237617924	RefSeqFE_enhancer_GeneID:110121229	intergenic_gene_5prime-distal	.	ENCODEcCRE,Ensembl104,FANTOM5,VISTA,dbSUPER	NG_053844.1	Homo_sapiens
NC_000002.12	237894725	237898955	RefSeqFE_enhancer_GeneID:110121236	gene-overlapping,intronic	protein_coding_GeneID:10267_RAMP1	ENCODEcCRE,Ensembl104,FANTOM5,VISTA,dbSUPER	NG_053851.1	Homo_sapiens
NC_000002.12	237964147	237964551	RefSeqFE_transcriptional_cis_regulatory_region_GeneID:115947637	intergenic_gene_5prime-distal	.	ENCODEcCRE	NG_066580.1	Homo_sapiens
NC_000002.12	237964877	237965541	RefSeqFE_transcriptional_cis_regulatory_region_GeneID:115947638	intergenic_gene_5prime-proximal	.	ENCODEcCRE	NG_066581.1	Homo_sapiens
NC_000002.12	238098487	238098782	RefSeqFE_enhancer_GeneID:112840914	UTR-overlapping,exon-overlapping,gene-overlapping	lncRNA_GeneID:100533179_UBE2F-SCLY,protein_coding_GeneID:51540_SCLY	ENCODEcCRE	NG_060949.1	Homo_sapiens
NC_000002.12	238421294	238421980	RefSeqFE_transcriptional_cis_regulatory_region_GeneID:115947639	intergenic_gene_5prime-distal	.	ENCODEcCRE,dbSUPER	NG_066582.1	Homo_sapiens
NC_000002.12	238422150	238422783	RefSeqFE_transcriptional_cis_regulatory_region_GeneID:115947640	intergenic_gene_5prime-distal	.	ENCODEcCRE,FANTOM5,dbSUPER	NG_066583.1	Homo_sapiens
NC_000002.12	238864207	238864502	RefSeqFE_enhancer_GeneID:112840915	gene-overlapping,intronic	protein_coding_GeneID:117581_TWIST2[ClinVar_submission_gene,RSG_gene]	ENCODEcCRE,FANTOM5,dbSUPER	NG_060950.1	Homo_sapiens
NC_000002.12	240256331	240256626	RefSeqFE_enhancer_GeneID:112840918	UTR-overlapping,exon-overlapping,gene-overlapping	lncRNA_GeneID:105373968_LOC105373968	ENCODEcCRE,Ensembl104,FANTOM5,dbSUPER	NG_060953.1	Homo_sapiens
NC_000002.12	240257939	240260738	RefSeqFE_enhancer_GeneID:110121201	intergenic_gene_5prime-distal	.	ENCODEcCRE,Ensembl104,FANTOM5,VISTA,dbSUPER	NG_053818.1	Homo_sapiens
NC_000002.12	240368561	240373577	RefSeqFE_enhancer_GeneID:110121227	intergenic_gene_5prime-distal	.	ENCODEcCRE,Ensembl104,FANTOM5,VISTA,dbSUPER	NG_053842.1	Homo_sapiens
NC_000002.12	240387737	240387882	RefSeqFE_enhancer_GeneID:111501790	gene-overlapping,intronic	lncRNA_GeneID:102723825_LOC102723825	ENCODEcCRE,Ensembl104,dbSUPER	NG_055946.1	Homo_sapiens
NC_000002.12	240387804	240387815	RefSeqFE_transcriptional_cis_regulatory_region_GeneID:111501790	gene-overlapping,intronic	lncRNA_GeneID:102723825_LOC102723825	ENCODEcCRE,dbSUPER	NG_055946.1	Homo_sapiens
NC_000002.12	240434031	240434326	RefSeqFE_enhancer_GeneID:112840919	intergenic_gene_5prime-proximal	.	ENCODEcCRE,Ensembl104,FANTOM5,dbSUPER	NG_060954.1	Homo_sapiens
NC_000002.12	240560941	240561083	RefSeqFE_enhancer_GeneID:106783501	CDS-overlapping,exon-overlapping,gene-overlapping	protein_coding_GeneID:285193_DUSP28,protein_coding_GeneID:51281_ANKMY1	ENCODEcCRE,Ensembl104,dbSUPER	NG_046084.1	Homo_sapiens
NC_000002.12	240586511	240586806	RefSeqFE_enhancer_GeneID:112840920	UTR-overlapping,exon-overlapping,gene-overlapping	protein_coding_GeneID:11132_CAPN10[ClinVar_submission_gene,RSG_gene]	ENCODEcCRE,Ensembl104,dbSUPER	NG_060955.1	Homo_sapiens
NC_000002.12	241803953	241809030	RefSeqFE_meiotic_recombination_region_GeneID:110599582	intergenic_gene_5prime-proximal	.	ENCODEcCRE,Ensembl104	NG_055446.1	Homo_sapiens
NC_000002.12	241805162	241808139	RefSeqFE_repeat_instability_region_GeneID:110599582	intergenic_gene_5prime-proximal	.	ENCODEcCRE,Ensembl104	NG_055446.1	Homo_sapiens
NC_000002.12	241805182	241808000	RefSeqFE_minisatellite_GeneID:110599582	intergenic_gene_5prime-proximal	.	ENCODEcCRE,Ensembl104	NG_055446.1	Homo_sapiens
NC_000002.12	241805245	241805258	RefSeqFE_nucleotide_motif_GeneID:110599582	intergenic_gene_5prime-distal	.	.	NG_055446.1	Homo_sapiens
NC_000002.12	241805440	241805453	RefSeqFE_nucleotide_motif_GeneID:110599582	intergenic_gene_5prime-distal	.	.	NG_055446.1	Homo_sapiens
NC_000002.12	241805479	241805492	RefSeqFE_nucleotide_motif_GeneID:110599582	intergenic_gene_5prime-distal	.	.	NG_055446.1	Homo_sapiens
NC_000002.12	241805518	241805531	RefSeqFE_nucleotide_motif_GeneID:110599582	intergenic_gene_5prime-distal	.	.	NG_055446.1	Homo_sapiens
NC_000002.12	241805553	241805566	RefSeqFE_nucleotide_motif_GeneID:110599582	intergenic_gene_5prime-distal	.	.	NG_055446.1	Homo_sapiens
NC_000002.12	241805592	241805605	RefSeqFE_nucleotide_motif_GeneID:110599582	intergenic_gene_5prime-distal	.	.	NG_055446.1	Homo_sapiens
NC_000002.12	241805631	241805644	RefSeqFE_nucleotide_motif_GeneID:110599582	intergenic_gene_5prime-distal	.	.	NG_055446.1	Homo_sapiens
NC_000002.12	241805666	241805679	RefSeqFE_nucleotide_motif_GeneID:110599582	intergenic_gene_5prime-distal	.	.	NG_055446.1	Homo_sapiens
NC_000002.12	241805705	241805718	RefSeqFE_nucleotide_motif_GeneID:110599582	intergenic_gene_5prime-distal	.	.	NG_055446.1	Homo_sapiens
NC_000002.12	241805779	241805792	RefSeqFE_nucleotide_motif_GeneID:110599582	intergenic_gene_5prime-distal	.	.	NG_055446.1	Homo_sapiens
NC_000002.12	241805818	241805831	RefSeqFE_nucleotide_motif_GeneID:110599582	intergenic_gene_5prime-distal	.	.	NG_055446.1	Homo_sapiens
NC_000002.12	241805857	241805870	RefSeqFE_nucleotide_motif_GeneID:110599582	intergenic_gene_5prime-distal	.	.	NG_055446.1	Homo_sapiens
NC_000002.12	241805896	241805909	RefSeqFE_nucleotide_motif_GeneID:110599582	intergenic_gene_5prime-distal	.	.	NG_055446.1	Homo_sapiens
NC_000002.12	241805963	241805976	RefSeqFE_nucleotide_motif_GeneID:110599582	intergenic_gene_5prime-distal	.	.	NG_055446.1	Homo_sapiens
NC_000002.12	241805999	241806012	RefSeqFE_nucleotide_motif_GeneID:110599582	intergenic_gene_5prime-distal	.	.	NG_055446.1	Homo_sapiens
NC_000002.12	241806116	241806129	RefSeqFE_nucleotide_motif_GeneID:110599582	intergenic_gene_5prime-distal	.	.	NG_055446.1	Homo_sapiens
NC_000002.12	241806151	241806164	RefSeqFE_nucleotide_motif_GeneID:110599582	intergenic_gene_5prime-distal	.	.	NG_055446.1	Homo_sapiens
NC_000002.12	241806186	241806199	RefSeqFE_nucleotide_motif_GeneID:110599582	intergenic_gene_5prime-distal	.	.	NG_055446.1	Homo_sapiens
NC_000002.12	241806221	241806234	RefSeqFE_nucleotide_motif_GeneID:110599582	intergenic_gene_5prime-distal	.	Ensembl104	NG_055446.1	Homo_sapiens
NC_000002.12	241806378	241806391	RefSeqFE_nucleotide_motif_GeneID:110599582	intergenic_gene_5prime-distal	.	Ensembl104	NG_055446.1	Homo_sapiens
NC_000002.12	241806455	241806468	RefSeqFE_nucleotide_motif_GeneID:110599582	intergenic_gene_5prime-distal	.	.	NG_055446.1	Homo_sapiens
NC_000002.12	241806494	241806507	RefSeqFE_nucleotide_motif_GeneID:110599582	intergenic_gene_5prime-distal	.	.	NG_055446.1	Homo_sapiens
NC_000002.12	241806529	241806542	RefSeqFE_nucleotide_motif_GeneID:110599582	intergenic_gene_5prime-distal	.	.	NG_055446.1	Homo_sapiens
NC_000002.12	241806642	241806655	RefSeqFE_nucleotide_motif_GeneID:110599582	intergenic_gene_5prime-distal	.	Ensembl104	NG_055446.1	Homo_sapiens
NC_000002.12	241806681	241806694	RefSeqFE_nucleotide_motif_GeneID:110599582	intergenic_gene_5prime-distal	.	Ensembl104	NG_055446.1	Homo_sapiens
NC_000002.12	241806755	241806768	RefSeqFE_nucleotide_motif_GeneID:110599582	intergenic_gene_5prime-distal	.	Ensembl104	NG_055446.1	Homo_sapiens
NC_000002.12	241806794	241806807	RefSeqFE_nucleotide_motif_GeneID:110599582	intergenic_gene_5prime-distal	.	Ensembl104	NG_055446.1	Homo_sapiens
NC_000002.12	241806985	241806998	RefSeqFE_nucleotide_motif_GeneID:110599582	intergenic_gene_5prime-distal	.	Ensembl104	NG_055446.1	Homo_sapiens
NC_000002.12	241807020	241807033	RefSeqFE_nucleotide_motif_GeneID:110599582	intergenic_gene_5prime-distal	.	Ensembl104	NG_055446.1	Homo_sapiens
NC_000002.12	241807059	241807072	RefSeqFE_nucleotide_motif_GeneID:110599582	intergenic_gene_5prime-distal	.	Ensembl104	NG_055446.1	Homo_sapiens
NC_000002.12	241807098	241807111	RefSeqFE_nucleotide_motif_GeneID:110599582	intergenic_gene_5prime-distal	.	Ensembl104	NG_055446.1	Homo_sapiens
NC_000002.12	241807215	241807228	RefSeqFE_nucleotide_motif_GeneID:110599582	intergenic_gene_5prime-proximal	.	.	NG_055446.1	Homo_sapiens
NC_000002.12	241807449	241807462	RefSeqFE_nucleotide_motif_GeneID:110599582	intergenic_gene_5prime-proximal	.	.	NG_055446.1	Homo_sapiens
NC_000002.12	241807526	241807539	RefSeqFE_nucleotide_motif_GeneID:110599582	intergenic_gene_5prime-proximal	.	.	NG_055446.1	Homo_sapiens
NC_000002.12	241807608	241807621	RefSeqFE_nucleotide_motif_GeneID:110599582	intergenic_gene_5prime-proximal	.	.	NG_055446.1	Homo_sapiens
NC_000002.12	241807651	241807664	RefSeqFE_nucleotide_motif_GeneID:110599582	intergenic_gene_5prime-proximal	.	.	NG_055446.1	Homo_sapiens
NC_000002.12	241807690	241807703	RefSeqFE_nucleotide_motif_GeneID:110599582	intergenic_gene_5prime-proximal	.	.	NG_055446.1	Homo_sapiens
NC_000002.12	241807807	241807820	RefSeqFE_nucleotide_motif_GeneID:110599582	intergenic_gene_5prime-proximal	.	.	NG_055446.1	Homo_sapiens
NC_000002.12	241807846	241807859	RefSeqFE_nucleotide_motif_GeneID:110599582	intergenic_gene_5prime-proximal	.	.	NG_055446.1	Homo_sapiens
NC_000002.12	241807889	241807902	RefSeqFE_nucleotide_motif_GeneID:110599582	intergenic_gene_5prime-proximal	.	.	NG_055446.1	Homo_sapiens
NC_000002.12	241807932	241807945	RefSeqFE_nucleotide_motif_GeneID:110599582	intergenic_gene_5prime-proximal	.	.	NG_055446.1	Homo_sapiens
NC_000002.12	241807971	241807984	RefSeqFE_nucleotide_motif_GeneID:110599582	intergenic_gene_5prime-proximal	.	.	NG_055446.1	Homo_sapiens
NC_000002.12	241808096	241808109	RefSeqFE_nucleotide_motif_GeneID:110599582	intergenic_gene_5prime-proximal	.	.	NG_055446.1	Homo_sapiens
NC_000003.12	264777	264922	RefSeqFE_enhancer_GeneID:111429626	gene-overlapping,intronic	protein_coding_GeneID:10752_CHL1[ClinVar_submission_gene]	ENCODEcCRE,Ensembl104	NG_055899.1	Homo_sapiens
NC_000003.12	264843	264855	RefSeqFE_transcriptional_cis_regulatory_region_GeneID:111429626	gene-overlapping,intronic	protein_coding_GeneID:10752_CHL1[ClinVar_submission_gene]	ENCODEcCRE,Ensembl104	NG_055899.1	Homo_sapiens
NC_000003.12	1662983	1665345	RefSeqFE_meiotic_recombination_region_GeneID:107522035	intergenic_gene_5prime-distal	.	Ensembl104	NG_046856.1	Homo_sapiens
NC_000003.12	1664421	1666637	RefSeqFE_meiotic_recombination_region_GeneID:107522035	intergenic_gene_5prime-distal	.	.	NG_046856.1	Homo_sapiens
NC_000003.12	1664487	1667109	RefSeqFE_meiotic_recombination_region_GeneID:107522035	intergenic_gene_5prime-distal	.	.	NG_046856.1	Homo_sapiens
NC_000003.12	1664728	1665346	RefSeqFE_meiotic_recombination_region_GeneID:107522035	intergenic_gene_5prime-distal	.	.	NG_046856.1	Homo_sapiens
NC_000003.12	1667519	1668548	RefSeqFE_meiotic_recombination_region_GeneID:107522035	intergenic_gene_5prime-distal	.	.	NG_046856.1	Homo_sapiens
NC_000003.12	1667836	1667837	RefSeqFE_sequence_alteration_GeneID:107522035	intergenic_gene_5prime-distal	.	.	NG_046856.1	Homo_sapiens
NC_000003.12	2380638	2385861	RefSeqFE_meiotic_recombination_region_GeneID:107522028	gene-overlapping,intronic	protein_coding_GeneID:152330_CNTN4[RSG_gene]	Ensembl104	NG_046851.1	Homo_sapiens
NC_000003.12	2380690	2386447	RefSeqFE_meiotic_recombination_region_GeneID:107522028	gene-overlapping,intronic	protein_coding_GeneID:152330_CNTN4[RSG_gene]	ENCODEcCRE,Ensembl104	NG_046851.1	Homo_sapiens
NC_000003.12	2381104	2381120	RefSeqFE_nucleotide_motif_GeneID:107522028	gene-overlapping,intronic	protein_coding_GeneID:152330_CNTN4[RSG_gene]	.	NG_046851.1	Homo_sapiens
NC_000003.12	2382074	2382090	RefSeqFE_nucleotide_motif_GeneID:107522028	gene-overlapping,intronic	protein_coding_GeneID:152330_CNTN4[RSG_gene]	.	NG_046851.1	Homo_sapiens
NC_000003.12	2383619	2383635	RefSeqFE_nucleotide_motif_GeneID:107522028	gene-overlapping,intronic	protein_coding_GeneID:152330_CNTN4[RSG_gene]	.	NG_046851.1	Homo_sapiens
NC_000003.12	2383656	2383672	RefSeqFE_nucleotide_motif_GeneID:107522028	gene-overlapping,intronic	protein_coding_GeneID:152330_CNTN4[RSG_gene]	.	NG_046851.1	Homo_sapiens
NC_000003.12	2383804	2383820	RefSeqFE_nucleotide_motif_GeneID:107522028	gene-overlapping,intronic	protein_coding_GeneID:152330_CNTN4[RSG_gene]	.	NG_046851.1	Homo_sapiens
NC_000003.12	2383871	2386323	RefSeqFE_meiotic_recombination_region_GeneID:107522028	gene-overlapping,intronic	protein_coding_GeneID:152330_CNTN4[RSG_gene]	ENCODEcCRE,Ensembl104	NG_046851.1	Homo_sapiens
NC_000003.12	2384155	2385955	RefSeqFE_meiotic_recombination_region_GeneID:107522028	gene-overlapping,intronic	protein_coding_GeneID:152330_CNTN4[RSG_gene]	Ensembl104	NG_046851.1	Homo_sapiens
NC_000003.12	2385671	2385684	RefSeqFE_nucleotide_motif_GeneID:107522028	gene-overlapping,intronic	protein_coding_GeneID:152330_CNTN4[RSG_gene]	.	NG_046851.1	Homo_sapiens
NC_000003.12	4340584	4340879	RefSeqFE_enhancer_GeneID:112935931	gene-overlapping,intronic	protein_coding_GeneID:285362_SUMF1[ClinVar_submission_gene,RSG_gene]	ENCODEcCRE	NG_061447.1	Homo_sapiens
NC_000003.12	4533804	4534099	RefSeqFE_enhancer_GeneID:112935932	gene-overlapping,intronic	protein_coding_GeneID:3708_ITPR1[ClinVar_submission_gene,RSG_gene]	ENCODEcCRE,Ensembl104,FANTOM5,dbSUPER	NG_061448.1	Homo_sapiens
NC_000003.12	5021828	5022027	RefSeqFE_transcriptional_cis_regulatory_region_GeneID:115995504	gene-overlapping,intronic	lncRNA_GeneID:105376934_LOC105376934	ENCODEcCRE,FANTOM5,dbSUPER	NG_066585.1	Homo_sapiens
NC_000003.12	5349414	5349559	RefSeqFE_enhancer_GeneID:111501788	intergenic_gene_5prime-distal	.	ENCODEcCRE,Ensembl104	NG_055945.1	Homo_sapiens
NC_000003.12	5349481	5349492	RefSeqFE_transcriptional_cis_regulatory_region_GeneID:111501788	intergenic_gene_5prime-distal	.	ENCODEcCRE,Ensembl104	NG_055945.1	Homo_sapiens
NC_000003.12	9897904	9898199	RefSeqFE_enhancer_GeneID:112935963	intergenic_gene_5prime-distal	.	ENCODEcCRE,dbSUPER	NG_061478.1	Homo_sapiens
NC_000003.12	9897904	9898199	RefSeqFE_silencer_GeneID:112935963	intergenic_gene_5prime-distal	.	ENCODEcCRE,dbSUPER	NG_061478.1	Homo_sapiens
NC_000003.12	9950512	9950802	RefSeqFE_mobile_genetic_element_GeneID:107303337	gene-overlapping,intronic	lncRNA_GeneID:100874032_PRRT3-AS1,protein_coding_GeneID:285368_PRRT3	.	NG_046753.1	Homo_sapiens
NC_000003.12	9950596	9950627	RefSeqFE_non_allelic_homologous_recombination_region_GeneID:107303337	gene-overlapping,intronic	lncRNA_GeneID:100874032_PRRT3-AS1,protein_coding_GeneID:285368_PRRT3	.	NG_046753.1	Homo_sapiens
NC_000003.12	10030946	10031850	RefSeqFE_meiotic_recombination_region_GeneID:107303338	gene-overlapping,intronic	protein_coding_GeneID:2177_FANCD2[ClinVar_submission_gene,LRG_gene,RSG_gene]	.	NG_046754.1	Homo_sapiens
NC_000003.12	10031210	10031223	RefSeqFE_nucleotide_motif_GeneID:107303338	gene-overlapping,intronic	protein_coding_GeneID:2177_FANCD2[ClinVar_submission_gene,LRG_gene,RSG_gene]	.	NG_046754.1	Homo_sapiens
NC_000003.12	10031221	10031521	RefSeqFE_mobile_genetic_element_GeneID:107303338	gene-overlapping,intronic	protein_coding_GeneID:2177_FANCD2[ClinVar_submission_gene,LRG_gene,RSG_gene]	.	NG_046754.1	Homo_sapiens
NC_000003.12	10031263	10031276	RefSeqFE_nucleotide_motif_GeneID:107303338	gene-overlapping,intronic	protein_coding_GeneID:2177_FANCD2[ClinVar_submission_gene,LRG_gene,RSG_gene]	.	NG_046754.1	Homo_sapiens
NC_000003.12	10031451	10031481	RefSeqFE_non_allelic_homologous_recombination_region_GeneID:107303338	gene-overlapping,intronic	protein_coding_GeneID:2177_FANCD2[ClinVar_submission_gene,LRG_gene,RSG_gene]	.	NG_046754.1	Homo_sapiens
NC_000003.12	10050026	10050938	RefSeqFE_meiotic_recombination_region_GeneID:107303338	gene-overlapping,intronic	protein_coding_GeneID:2177_FANCD2[ClinVar_submission_gene,LRG_gene,RSG_gene]	.	NG_046754.1	Homo_sapiens
NC_000003.12	10050384	10050397	RefSeqFE_nucleotide_motif_GeneID:107303338	gene-overlapping,intronic	protein_coding_GeneID:2177_FANCD2[ClinVar_submission_gene,LRG_gene,RSG_gene]	.	NG_046754.1	Homo_sapiens
NC_000003.12	10067514	10067816	RefSeqFE_mobile_genetic_element_GeneID:107303338	gene-overlapping,intronic	protein_coding_GeneID:2177_FANCD2[ClinVar_submission_gene,LRG_gene,RSG_gene]	.	NG_046754.1	Homo_sapiens
NC_000003.12	10067596	10067617	RefSeqFE_non_allelic_homologous_recombination_region_GeneID:107303338	gene-overlapping,intronic	protein_coding_GeneID:2177_FANCD2[ClinVar_submission_gene,LRG_gene,RSG_gene]	.	NG_046754.1	Homo_sapiens
NC_000003.12	10078348	10078653	RefSeqFE_mobile_genetic_element_GeneID:107303338	gene-overlapping,intronic	protein_coding_GeneID:2177_FANCD2[ClinVar_submission_gene,LRG_gene,RSG_gene]	.	NG_046754.1	Homo_sapiens
NC_000003.12	10078486	10078502	RefSeqFE_non_allelic_homologous_recombination_region_GeneID:107303338	gene-overlapping,intronic	protein_coding_GeneID:2177_FANCD2[ClinVar_submission_gene,LRG_gene,RSG_gene]	.	NG_046754.1	Homo_sapiens
NC_000003.12	10120031	10120196	RefSeqFE_mobile_genetic_element_GeneID:107303339	gene-overlapping,intronic	protein_coding_GeneID:55845_BRK1	.	NG_046755.1	Homo_sapiens
NC_000003.12	10120132	10120137	RefSeqFE_non_allelic_homologous_recombination_region_GeneID:107303339	gene-overlapping,intronic	protein_coding_GeneID:55845_BRK1	.	NG_046755.1	Homo_sapiens
NC_000003.12	10127305	10127605	RefSeqFE_mobile_genetic_element_GeneID:107303339	intergenic_gene_5prime-distal	.	.	NG_046755.1	Homo_sapiens
NC_000003.12	10127403	10127412	RefSeqFE_non_allelic_homologous_recombination_region_GeneID:107303339	intergenic_gene_5prime-distal	.	.	NG_046755.1	Homo_sapiens
NC_000003.12	10130816	10131114	RefSeqFE_mobile_genetic_element_GeneID:107303339	intergenic_gene_5prime-distal	.	.	NG_046755.1	Homo_sapiens
NC_000003.12	10131026	10131032	RefSeqFE_non_allelic_homologous_recombination_region_GeneID:107303339	intergenic_gene_5prime-distal	.	.	NG_046755.1	Homo_sapiens
NC_000003.12	10131446	10131607	RefSeqFE_mobile_genetic_element_GeneID:107303339	intergenic_gene_5prime-distal	.	.	NG_046755.1	Homo_sapiens
NC_000003.12	10131586	10131589	RefSeqFE_non_allelic_homologous_recombination_region_GeneID:107303339	intergenic_gene_5prime-distal	.	.	NG_046755.1	Homo_sapiens
NC_000003.12	10133960	10134243	RefSeqFE_mobile_genetic_element_GeneID:107303339	intergenic_gene_5prime-distal	.	.	NG_046755.1	Homo_sapiens
NC_000003.12	10133979	10134180	RefSeqFE_non_allelic_homologous_recombination_region_GeneID:107303339	intergenic_gene_5prime-distal	.	.	NG_046755.1	Homo_sapiens
NC_000003.12	10136666	10136930	RefSeqFE_mobile_genetic_element_GeneID:107303339	intergenic_gene_5prime-distal	.	.	NG_046755.1	Homo_sapiens
NC_000003.12	10136783	10136787	RefSeqFE_non_allelic_homologous_recombination_region_GeneID:107303339	intergenic_gene_5prime-distal	.	.	NG_046755.1	Homo_sapiens
NC_000003.12	10137016	10137317	RefSeqFE_mobile_genetic_element_GeneID:107303339	intergenic_gene_5prime-distal	.	ENCODEcCRE,Ensembl104	NG_046755.1	Homo_sapiens
NC_000003.12	10137094	10137111	RefSeqFE_non_allelic_homologous_recombination_region_GeneID:107303339	intergenic_gene_5prime-distal	.	.	NG_046755.1	Homo_sapiens
NC_000003.12	10138112	10138411	RefSeqFE_mobile_genetic_element_GeneID:107303339	intergenic_gene_5prime-distal	.	.	NG_046755.1	Homo_sapiens
NC_000003.12	10138129	10138400	RefSeqFE_non_allelic_homologous_recombination_region_GeneID:107303339	intergenic_gene_5prime-distal	.	.	NG_046755.1	Homo_sapiens
NC_000003.12	10138529	10138833	RefSeqFE_mobile_genetic_element_GeneID:107303339	intergenic_gene_5prime-distal	.	.	NG_046755.1	Homo_sapiens
NC_000003.12	10138685	10138705	RefSeqFE_non_allelic_homologous_recombination_region_GeneID:107303339	intergenic_gene_5prime-distal	.	.	NG_046755.1	Homo_sapiens
NC_000003.12	10142338	10142643	RefSeqFE_mobile_genetic_element_GeneID:107303340	gene-overlapping,intronic	protein_coding_GeneID:7428_VHL[ClinVar_submission_gene,LRG_gene,RSG_gene]	ENCODEcCRE,Ensembl104	NG_046756.1	Homo_sapiens
NC_000003.12	10142362	10142614	RefSeqFE_non_allelic_homologous_recombination_region_GeneID:107303340	gene-overlapping,intronic	protein_coding_GeneID:7428_VHL[ClinVar_submission_gene,LRG_gene,RSG_gene]	ENCODEcCRE,Ensembl104	NG_046756.1	Homo_sapiens
NC_000003.12	10143117	10143428	RefSeqFE_mobile_genetic_element_GeneID:107303340	gene-overlapping,intronic	protein_coding_GeneID:7428_VHL[ClinVar_submission_gene,LRG_gene,RSG_gene]	ENCODEcCRE,Ensembl104	NG_046756.1	Homo_sapiens
NC_000003.12	10143378	10143394	RefSeqFE_non_allelic_homologous_recombination_region_GeneID:107303340	gene-overlapping,intronic	protein_coding_GeneID:7428_VHL[ClinVar_submission_gene,LRG_gene,RSG_gene]	ENCODEcCRE,Ensembl104	NG_046756.1	Homo_sapiens
NC_000003.12	10143461	10143729	RefSeqFE_mobile_genetic_element_GeneID:107303340	gene-overlapping,intronic	protein_coding_GeneID:7428_VHL[ClinVar_submission_gene,LRG_gene,RSG_gene]	ENCODEcCRE,Ensembl104	NG_046756.1	Homo_sapiens
NC_000003.12	10143465	10143467	RefSeqFE_non_allelic_homologous_recombination_region_GeneID:107303340	gene-overlapping,intronic	protein_coding_GeneID:7428_VHL[ClinVar_submission_gene,LRG_gene,RSG_gene]	ENCODEcCRE,Ensembl104	NG_046756.1	Homo_sapiens
NC_000003.12	10144956	10145209	RefSeqFE_mobile_genetic_element_GeneID:107303340	gene-overlapping,intronic	protein_coding_GeneID:7428_VHL[ClinVar_submission_gene,LRG_gene,RSG_gene]	Ensembl104	NG_046756.1	Homo_sapiens
NC_000003.12	10145112	10145118	RefSeqFE_non_allelic_homologous_recombination_region_GeneID:107303340	gene-overlapping,intronic	protein_coding_GeneID:7428_VHL[ClinVar_submission_gene,LRG_gene,RSG_gene]	.	NG_046756.1	Homo_sapiens
NC_000003.12	10145423	10145735	RefSeqFE_mobile_genetic_element_GeneID:107303340	gene-overlapping,intronic	protein_coding_GeneID:7428_VHL[ClinVar_submission_gene,LRG_gene,RSG_gene]	ENCODEcCRE,Ensembl104	NG_046756.1	Homo_sapiens
NC_000003.12	10145469	10145573	RefSeqFE_non_allelic_homologous_recombination_region_GeneID:107303340	gene-overlapping,intronic	protein_coding_GeneID:7428_VHL[ClinVar_submission_gene,LRG_gene,RSG_gene]	Ensembl104	NG_046756.1	Homo_sapiens
NC_000003.12	10146173	10146473	RefSeqFE_mobile_genetic_element_GeneID:107303340	gene-overlapping,intronic	protein_coding_GeneID:7428_VHL[ClinVar_submission_gene,LRG_gene,RSG_gene]	Ensembl104	NG_046756.1	Homo_sapiens
NC_000003.12	10146191	10146375	RefSeqFE_non_allelic_homologous_recombination_region_GeneID:107303340	gene-overlapping,intronic	protein_coding_GeneID:7428_VHL[ClinVar_submission_gene,LRG_gene,RSG_gene]	Ensembl104	NG_046756.1	Homo_sapiens
NC_000003.12	10147013	10147309	RefSeqFE_mobile_genetic_element_GeneID:107303340	gene-overlapping,intronic	protein_coding_GeneID:7428_VHL[ClinVar_submission_gene,LRG_gene,RSG_gene]	.	NG_046756.1	Homo_sapiens
NC_000003.12	10147054	10147211	RefSeqFE_non_allelic_homologous_recombination_region_GeneID:107303340	gene-overlapping,intronic	protein_coding_GeneID:7428_VHL[ClinVar_submission_gene,LRG_gene,RSG_gene]	.	NG_046756.1	Homo_sapiens
NC_000003.12	10147359	10147664	RefSeqFE_mobile_genetic_element_GeneID:107303340	gene-overlapping,intronic	protein_coding_GeneID:7428_VHL[ClinVar_submission_gene,LRG_gene,RSG_gene]	.	NG_046756.1	Homo_sapiens
NC_000003.12	10147617	10147635	RefSeqFE_non_allelic_homologous_recombination_region_GeneID:107303340	gene-overlapping,intronic	protein_coding_GeneID:7428_VHL[ClinVar_submission_gene,LRG_gene,RSG_gene]	.	NG_046756.1	Homo_sapiens
NC_000003.12	10148310	10148613	RefSeqFE_mobile_genetic_element_GeneID:107303340	gene-overlapping,intronic	protein_coding_GeneID:7428_VHL[ClinVar_submission_gene,LRG_gene,RSG_gene]	.	NG_046756.1	Homo_sapiens
NC_000003.12	10148314	10148534	RefSeqFE_non_allelic_homologous_recombination_region_GeneID:107303340	gene-overlapping,intronic	protein_coding_GeneID:7428_VHL[ClinVar_submission_gene,LRG_gene,RSG_gene]	.	NG_046756.1	Homo_sapiens
NC_000003.12	10148682	10148683	RefSeqFE_non_allelic_homologous_recombination_region_GeneID:107303340	gene-overlapping,intronic	protein_coding_GeneID:7428_VHL[ClinVar_submission_gene,LRG_gene,RSG_gene]	.	NG_046756.1	Homo_sapiens
NC_000003.12	10148682	10148972	RefSeqFE_mobile_genetic_element_GeneID:107303340	gene-overlapping,intronic	protein_coding_GeneID:7428_VHL[ClinVar_submission_gene,LRG_gene,RSG_gene]	.	NG_046756.1	Homo_sapiens
NC_000003.12	10149100	10149412	RefSeqFE_mobile_genetic_element_GeneID:107303340	gene-overlapping,intronic	protein_coding_GeneID:7428_VHL[ClinVar_submission_gene,LRG_gene,RSG_gene]	ENCODEcCRE,Ensembl104	NG_046756.1	Homo_sapiens
NC_000003.12	10149303	10149378	RefSeqFE_non_allelic_homologous_recombination_region_GeneID:107303340	gene-overlapping,intronic	protein_coding_GeneID:7428_VHL[ClinVar_submission_gene,LRG_gene,RSG_gene]	ENCODEcCRE,Ensembl104	NG_046756.1	Homo_sapiens
NC_000003.12	10149439	10149650	RefSeqFE_mobile_genetic_element_GeneID:107303340	gene-overlapping,intronic	protein_coding_GeneID:7428_VHL[ClinVar_submission_gene,LRG_gene,RSG_gene]	ENCODEcCRE,Ensembl104	NG_046756.1	Homo_sapiens
NC_000003.12	10149476	10149479	RefSeqFE_non_allelic_homologous_recombination_region_GeneID:107303340	gene-overlapping,intronic	protein_coding_GeneID:7428_VHL[ClinVar_submission_gene,LRG_gene,RSG_gene]	ENCODEcCRE,Ensembl104	NG_046756.1	Homo_sapiens
NC_000003.12	10150882	10151180	RefSeqFE_mobile_genetic_element_GeneID:107303340	UTR-overlapping,exon-overlapping,gene-overlapping	protein_coding_GeneID:7428_VHL[ClinVar_submission_gene,LRG_gene,RSG_gene]	.	NG_046756.1	Homo_sapiens
NC_000003.12	10150936	10150978	RefSeqFE_non_allelic_homologous_recombination_region_GeneID:107303340	UTR-overlapping,exon-overlapping,gene-overlapping	protein_coding_GeneID:7428_VHL[ClinVar_submission_gene,LRG_gene,RSG_gene]	.	NG_046756.1	Homo_sapiens
NC_000003.12	10152860	10152995	RefSeqFE_mobile_genetic_element_GeneID:107303340	UTR-overlapping,exon-overlapping,gene-overlapping	protein_coding_GeneID:7428_VHL[ClinVar_submission_gene,LRG_gene,RSG_gene]	.	NG_046756.1	Homo_sapiens
NC_000003.12	10152906	10152908	RefSeqFE_non_allelic_homologous_recombination_region_GeneID:107303340	UTR-overlapping,exon-overlapping,gene-overlapping	protein_coding_GeneID:7428_VHL[ClinVar_submission_gene,LRG_gene,RSG_gene]	.	NG_046756.1	Homo_sapiens
NC_000003.12	10157602	10157904	RefSeqFE_mobile_genetic_element_GeneID:107303340	intergenic_gene_5prime-distal	.	.	NG_046756.1	Homo_sapiens
NC_000003.12	10157796	10157803	RefSeqFE_non_allelic_homologous_recombination_region_GeneID:107303340	intergenic_gene_5prime-distal	.	.	NG_046756.1	Homo_sapiens
NC_000003.12	10158137	10158449	RefSeqFE_mobile_genetic_element_GeneID:107303340	intergenic_gene_5prime-distal	.	.	NG_046756.1	Homo_sapiens
NC_000003.12	10158302	10158321	RefSeqFE_non_allelic_homologous_recombination_region_GeneID:107303340	intergenic_gene_5prime-distal	.	.	NG_046756.1	Homo_sapiens
NC_000003.12	10160041	10160352	RefSeqFE_mobile_genetic_element_GeneID:107303340	intergenic_gene_5prime-distal	.	dbSUPER	NG_046756.1	Homo_sapiens
NC_000003.12	10160307	10160323	RefSeqFE_non_allelic_homologous_recombination_region_GeneID:107303340	intergenic_gene_5prime-distal	.	dbSUPER	NG_046756.1	Homo_sapiens
NC_000003.12	10160531	10170791	RefSeqFE_meiotic_recombination_region_GeneID:107303341	gene-overlapping,intronic	protein_coding_GeneID:3656_IRAK2	ENCODEcCRE,Ensembl104,dbSUPER	NG_046757.1	Homo_sapiens
NC_000003.12	10161266	10170495	RefSeqFE_meiotic_recombination_region_GeneID:107303341	gene-overlapping,intronic	protein_coding_GeneID:3656_IRAK2	ENCODEcCRE,Ensembl104,dbSUPER	NG_046757.1	Homo_sapiens
NC_000003.12	10163483	10163496	RefSeqFE_nucleotide_motif_GeneID:107303341	intergenic_gene_5prime-proximal	.	dbSUPER	NG_046757.1	Homo_sapiens
NC_000003.12	10164642	10166539	RefSeqFE_meiotic_recombination_region_GeneID:107303341	gene-overlapping,intronic	protein_coding_GeneID:3656_IRAK2	ENCODEcCRE,Ensembl104,dbSUPER	NG_046757.1	Homo_sapiens
NC_000003.12	10165296	10165309	RefSeqFE_nucleotide_motif_GeneID:107303341	gene-overlapping,intronic	protein_coding_GeneID:3656_IRAK2	ENCODEcCRE,Ensembl104,dbSUPER	NG_046757.1	Homo_sapiens
NC_000003.12	10165721	10165948	RefSeqFE_mobile_genetic_element_GeneID:107303341	gene-overlapping,intronic	protein_coding_GeneID:3656_IRAK2	ENCODEcCRE,Ensembl104,dbSUPER	NG_046757.1	Homo_sapiens
NC_000003.12	10165939	10165948	RefSeqFE_non_allelic_homologous_recombination_region_GeneID:107303341	gene-overlapping,intronic	protein_coding_GeneID:3656_IRAK2	Ensembl104,dbSUPER	NG_046757.1	Homo_sapiens
NC_000003.12	10165972	10165988	RefSeqFE_nucleotide_motif_GeneID:107303341	gene-overlapping,intronic	protein_coding_GeneID:3656_IRAK2	Ensembl104,dbSUPER	NG_046757.1	Homo_sapiens
NC_000003.12	10167414	10167714	RefSeqFE_mobile_genetic_element_GeneID:107303341	gene-overlapping,intronic	protein_coding_GeneID:3656_IRAK2	dbSUPER	NG_046757.1	Homo_sapiens
NC_000003.12	10167673	10167703	RefSeqFE_non_allelic_homologous_recombination_region_GeneID:107303341	gene-overlapping,intronic	protein_coding_GeneID:3656_IRAK2	dbSUPER	NG_046757.1	Homo_sapiens
NC_000003.12	10170540	10170556	RefSeqFE_nucleotide_motif_GeneID:107303341	gene-overlapping,intronic	protein_coding_GeneID:3656_IRAK2	Ensembl104,dbSUPER	NG_046757.1	Homo_sapiens
NC_000003.12	10171769	10171955	RefSeqFE_mobile_genetic_element_GeneID:107303341	gene-overlapping,intronic	protein_coding_GeneID:3656_IRAK2	Ensembl104,dbSUPER	NG_046757.1	Homo_sapiens
NC_000003.12	10171868	10171873	RefSeqFE_non_allelic_homologous_recombination_region_GeneID:107303341	gene-overlapping,intronic	protein_coding_GeneID:3656_IRAK2	Ensembl104,dbSUPER	NG_046757.1	Homo_sapiens
NC_000003.12	10175608	10175918	RefSeqFE_mobile_genetic_element_GeneID:107303341	gene-overlapping,intronic	protein_coding_GeneID:3656_IRAK2	Ensembl104,dbSUPER	NG_046757.1	Homo_sapiens
NC_000003.12	10175747	10175757	RefSeqFE_non_allelic_homologous_recombination_region_GeneID:107303341	gene-overlapping,intronic	protein_coding_GeneID:3656_IRAK2	Ensembl104,dbSUPER	NG_046757.1	Homo_sapiens
NC_000003.12	10182274	10182580	RefSeqFE_mobile_genetic_element_GeneID:107303341	gene-overlapping,intronic	protein_coding_GeneID:3656_IRAK2	Ensembl104,dbSUPER	NG_046757.1	Homo_sapiens
NC_000003.12	10182414	10182430	RefSeqFE_non_allelic_homologous_recombination_region_GeneID:107303341	gene-overlapping,intronic	protein_coding_GeneID:3656_IRAK2	Ensembl104,dbSUPER	NG_046757.1	Homo_sapiens
NC_000003.12	10184191	10185172	RefSeqFE_meiotic_recombination_region_GeneID:107303341	gene-overlapping,intronic	protein_coding_GeneID:3656_IRAK2	Ensembl104,dbSUPER	NG_046757.1	Homo_sapiens
NC_000003.12	10184975	10184988	RefSeqFE_nucleotide_motif_GeneID:107303341	gene-overlapping,intronic	protein_coding_GeneID:3656_IRAK2	dbSUPER	NG_046757.1	Homo_sapiens
NC_000003.12	10191012	10191307	RefSeqFE_mobile_genetic_element_GeneID:107303341	gene-overlapping,intronic	protein_coding_GeneID:3656_IRAK2	ENCODEcCRE,dbSUPER	NG_046757.1	Homo_sapiens
NC_000003.12	10191272	10191293	RefSeqFE_non_allelic_homologous_recombination_region_GeneID:107303341	gene-overlapping,intronic	protein_coding_GeneID:3656_IRAK2	ENCODEcCRE,dbSUPER	NG_046757.1	Homo_sapiens
NC_000003.12	10197917	10198200	RefSeqFE_mobile_genetic_element_GeneID:107303341	gene-overlapping,intronic	protein_coding_GeneID:3656_IRAK2	dbSUPER	NG_046757.1	Homo_sapiens
NC_000003.12	10198016	10198025	RefSeqFE_non_allelic_homologous_recombination_region_GeneID:107303341	gene-overlapping,intronic	protein_coding_GeneID:3656_IRAK2	dbSUPER	NG_046757.1	Homo_sapiens
NC_000003.12	10198876	10201593	RefSeqFE_meiotic_recombination_region_GeneID:107303341	gene-overlapping,intronic	protein_coding_GeneID:3656_IRAK2	ENCODEcCRE,FANTOM5,dbSUPER	NG_046757.1	Homo_sapiens
NC_000003.12	10199480	10199496	RefSeqFE_nucleotide_motif_GeneID:107303341	gene-overlapping,intronic	protein_coding_GeneID:3656_IRAK2	FANTOM5,dbSUPER	NG_046757.1	Homo_sapiens
NC_000003.12	10199538	10201616	RefSeqFE_meiotic_recombination_region_GeneID:107303341	gene-overlapping,intronic	protein_coding_GeneID:3656_IRAK2	ENCODEcCRE,Ensembl104,FANTOM5,dbSUPER	NG_046757.1	Homo_sapiens
NC_000003.12	10199884	10200187	RefSeqFE_mobile_genetic_element_GeneID:107303341	gene-overlapping,intronic	protein_coding_GeneID:3656_IRAK2	dbSUPER	NG_046757.1	Homo_sapiens
NC_000003.12	10199981	10200013	RefSeqFE_non_allelic_homologous_recombination_region_GeneID:107303341	gene-overlapping,intronic	protein_coding_GeneID:3656_IRAK2	dbSUPER	NG_046757.1	Homo_sapiens
NC_000003.12	10200239	10201782	RefSeqFE_meiotic_recombination_region_GeneID:107303341	gene-overlapping,intronic	protein_coding_GeneID:3656_IRAK2	Ensembl104,dbSUPER	NG_046757.1	Homo_sapiens
NC_000003.12	10253582	10255459	RefSeqFE_meiotic_recombination_region_GeneID:107303342	gene-overlapping,intronic	protein_coding_GeneID:9797_TATDN2	Ensembl104,dbSUPER	NG_046758.1	Homo_sapiens
NC_000003.12	10254980	10254996	RefSeqFE_nucleotide_motif_GeneID:107303342	gene-overlapping,intronic	protein_coding_GeneID:9797_TATDN2	Ensembl104,dbSUPER	NG_046758.1	Homo_sapiens
NC_000003.12	10257348	10257598	RefSeqFE_mobile_genetic_element_GeneID:107303342	gene-overlapping,intronic	protein_coding_GeneID:9797_TATDN2	dbSUPER	NG_046758.1	Homo_sapiens
NC_000003.12	10257429	10257450	RefSeqFE_non_allelic_homologous_recombination_region_GeneID:107303342	gene-overlapping,intronic	protein_coding_GeneID:9797_TATDN2	dbSUPER	NG_046758.1	Homo_sapiens
NC_000003.12	10263863	10267088	RefSeqFE_meiotic_recombination_region_GeneID:107303342	gene-overlapping,intronic	protein_coding_GeneID:9797_TATDN2	ENCODEcCRE,Ensembl104,dbSUPER	NG_046758.1	Homo_sapiens
NC_000003.12	10263863	10267423	RefSeqFE_meiotic_recombination_region_GeneID:107303342	gene-overlapping,intronic	protein_coding_GeneID:9797_TATDN2	ENCODEcCRE,Ensembl104,dbSUPER	NG_046758.1	Homo_sapiens
NC_000003.12	10266219	10268422	RefSeqFE_meiotic_recombination_region_GeneID:107303342	gene-overlapping,intronic	protein_coding_GeneID:9797_TATDN2	ENCODEcCRE,Ensembl104,dbSUPER	NG_046758.1	Homo_sapiens
NC_000003.12	10272076	10272080	RefSeqFE_non_allelic_homologous_recombination_region_GeneID:107303342	gene-overlapping,intronic	protein_coding_GeneID:9797_TATDN2	dbSUPER	NG_046758.1	Homo_sapiens
NC_000003.12	10460184	10460479	RefSeqFE_silencer_GeneID:114004374	gene-overlapping,intronic	protein_coding_GeneID:491_ATP2B2[ClinVar_submission_gene,RSG_gene]	Ensembl104,dbSUPER	NG_063794.1	Homo_sapiens
NC_000003.12	10758603	10758898	RefSeqFE_enhancer_GeneID:112841609	intergenic_gene_5prime-distal	.	ENCODEcCRE,Ensembl104	NG_061342.1	Homo_sapiens
NC_000003.12	11225802	11226097	RefSeqFE_enhancer_GeneID:112848342	UTR-overlapping,exon-overlapping,gene-overlapping	protein_coding_GeneID:3269_HRH1	ENCODEcCRE,Ensembl104,dbSUPER	NG_061346.1	Homo_sapiens
NC_000003.12	12405598	12406178	RefSeqFE_enhancer_GeneID:114803475	CDS-overlapping,exon-overlapping,gene-overlapping	protein_coding_GeneID:5468_PPARG[ClinVar_submission_gene,RSG_gene]	ENCODEcCRE,dbSUPER	NG_064651.1	Homo_sapiens
NC_000003.12	13451610	13452192	RefSeqFE_enhancer_GeneID:108254666	intergenic_gene_5prime-distal	.	ENCODEcCRE,FANTOM5,dbSUPER	NG_051012.1	Homo_sapiens
NC_000003.12	13451780	13452106	RefSeqFE_CAGE_cluster_GeneID:108254666	intergenic_gene_5prime-distal	.	ENCODEcCRE,FANTOM5,dbSUPER	NG_051012.1	Homo_sapiens
NC_000003.12	13662348	13662643	RefSeqFE_enhancer_GeneID:112903834	gene-overlapping,intronic	lncRNA_GeneID:285375_LINC00620	ENCODEcCRE,Ensembl104	NG_061365.1	Homo_sapiens
NC_000003.12	14232346	14233211	RefSeqFE_transcriptional_cis_regulatory_region_GeneID:115995505	intergenic_gene_5prime-distal	.	ENCODEcCRE,Ensembl104,dbSUPER	NG_066586.1	Homo_sapiens
NC_000003.12	14234497	14234613	RefSeqFE_transcriptional_cis_regulatory_region_GeneID:115995506	intergenic_gene_5prime-distal	.	ENCODEcCRE,dbSUPER	NG_066587.1	Homo_sapiens
NC_000003.12	14774744	14776723	RefSeqFE_meiotic_recombination_region_GeneID:107457584	intergenic_gene_5prime-distal	.	Ensembl104	NG_046832.1	Homo_sapiens
NC_000003.12	14774744	14777002	RefSeqFE_meiotic_recombination_region_GeneID:107457584	intergenic_gene_5prime-distal	.	Ensembl104	NG_046832.1	Homo_sapiens
NC_000003.12	14775155	14777347	RefSeqFE_meiotic_recombination_region_GeneID:107457584	intergenic_gene_5prime-distal	.	.	NG_046832.1	Homo_sapiens
NC_000003.12	14775719	14776919	RefSeqFE_meiotic_recombination_region_GeneID:107457584	intergenic_gene_5prime-distal	.	.	NG_046832.1	Homo_sapiens
NC_000003.12	14847961	14848256	RefSeqFE_enhancer_GeneID:112903841	gene-overlapping,intronic	protein_coding_GeneID:152273_FGD5	ENCODEcCRE,Ensembl104,dbSUPER	NG_061372.1	Homo_sapiens
NC_000003.12	16101521	16101816	RefSeqFE_enhancer_GeneID:112935902	intergenic_gene_5prime-distal	.	ENCODEcCRE,Ensembl104,dbSUPER	NG_061381.1	Homo_sapiens
NC_000003.12	18127869	18128745	RefSeqFE_enhancer_GeneID:110120630	gene-overlapping,intronic	lncRNA_GeneID:339862_LOC339862	ENCODEcCRE,Ensembl104,VISTA,dbSUPER	NG_053257.1	Homo_sapiens
NC_000003.12	20022859	20023307	RefSeqFE_transcriptional_cis_regulatory_region_GeneID:115995507	intergenic_gene_5prime-distal	.	ENCODEcCRE,Ensembl104	NG_066588.1	Homo_sapiens
NC_000003.12	20589336	20589631	RefSeqFE_enhancer_GeneID:112935927	intergenic_gene_5prime-distal	.	Ensembl104	NG_061442.1	Homo_sapiens
NC_000003.12	24352115	24352260	RefSeqFE_enhancer_GeneID:111465009	gene-overlapping,intronic	protein_coding_GeneID:7068_THRB[ClinVar_submission_gene,RSG_gene]	ENCODEcCRE,Ensembl104	NG_055915.1	Homo_sapiens
NC_000003.12	24352178	24352196	RefSeqFE_transcriptional_cis_regulatory_region_GeneID:111465009	gene-overlapping,intronic	protein_coding_GeneID:7068_THRB[ClinVar_submission_gene,RSG_gene]	Ensembl104	NG_055915.1	Homo_sapiens
NC_000003.12	24451718	24451863	RefSeqFE_enhancer_GeneID:111365223	gene-overlapping,intronic	protein_coding_GeneID:7068_THRB[ClinVar_submission_gene,RSG_gene]	ENCODEcCRE	NG_055838.1	Homo_sapiens
NC_000003.12	24451783	24451797	RefSeqFE_transcriptional_cis_regulatory_region_GeneID:111365223	gene-overlapping,intronic	protein_coding_GeneID:7068_THRB[ClinVar_submission_gene,RSG_gene]	ENCODEcCRE	NG_055838.1	Homo_sapiens
NC_000003.12	25617731	25617735	RefSeqFE_mitotic_recombination_region_GeneID:107133518	gene-overlapping,intronic	protein_coding_GeneID:7155_TOP2B[ClinVar_submission_gene,RSG_gene]	.	NG_046677.1	Homo_sapiens
NC_000003.12	27992336	27994260	RefSeqFE_enhancer_GeneID:110121143	intergenic_gene_5prime-distal	.	ENCODEcCRE,Ensembl104,VISTA	NG_053761.1	Homo_sapiens
NC_000003.12	30349532	30349677	RefSeqFE_enhancer_GeneID:111501778	UTR-overlapping,exon-overlapping,gene-overlapping	lncRNA_GeneID:101927995_LOC101927995	ENCODEcCRE,Ensembl104,dbSUPER	NG_055943.1	Homo_sapiens
NC_000003.12	30349596	30349614	RefSeqFE_transcriptional_cis_regulatory_region_GeneID:111501778	UTR-overlapping,exon-overlapping,gene-overlapping	lncRNA_GeneID:101927995_LOC101927995	ENCODEcCRE,Ensembl104,dbSUPER	NG_055943.1	Homo_sapiens
NC_000003.12	30597160	30597660	RefSeqFE_enhancer_GeneID:111365150	intergenic_gene_5prime-distal	.	ENCODEcCRE,dbSUPER	NG_055685.1	Homo_sapiens
NC_000003.12	30597338	30597483	RefSeqFE_enhancer_GeneID:111365150	intergenic_gene_5prime-distal	.	ENCODEcCRE,dbSUPER	NG_055685.1	Homo_sapiens
NC_000003.12	30597403	30597417	RefSeqFE_transcriptional_cis_regulatory_region_GeneID:111365150	intergenic_gene_5prime-distal	.	ENCODEcCRE,dbSUPER	NG_055685.1	Homo_sapiens
NC_000003.12	32800536	32800831	RefSeqFE_enhancer_GeneID:112935928	intergenic_gene_5prime-distal	.	Ensembl104	NG_061443.1	Homo_sapiens
NC_000003.12	36954886	36955096	RefSeqFE_transcriptional_cis_regulatory_region_GeneID:115995508	intergenic_gene_5prime-distal	.	ENCODEcCRE	NG_066589.1	Homo_sapiens
NC_000003.12	37229684	37230140	RefSeqFE_transcriptional_cis_regulatory_region_GeneID:115995509	intergenic_gene_5prime-distal	.	ENCODEcCRE,Ensembl104,dbSUPER	NG_066590.1	Homo_sapiens
NC_000003.12	37764507	37767589	RefSeqFE_enhancer_GeneID:110121232	gene-overlapping,intronic	lncRNA_GeneID:101928153_ITGA9-AS1[RSG_gene],protein_coding_GeneID:3680_ITGA9[RSG_gene]	ENCODEcCRE,Ensembl104,FANTOM5,VISTA	NG_053847.1	Homo_sapiens
NC_000003.12	37935306	37935451	RefSeqFE_enhancer_GeneID:111465007	gene-overlapping,intronic	protein_coding_GeneID:10217_CTDSPL	ENCODEcCRE,Ensembl104,dbSUPER	NG_055913.1	Homo_sapiens
NC_000003.12	37935372	37935386	RefSeqFE_transcriptional_cis_regulatory_region_GeneID:111465007	gene-overlapping,intronic	protein_coding_GeneID:10217_CTDSPL	ENCODEcCRE,Ensembl104,dbSUPER	NG_055913.1	Homo_sapiens
NC_000003.12	37993957	37994252	RefSeqFE_enhancer_GeneID:112935929	UTR-overlapping,exon-overlapping,gene-overlapping	protein_coding_GeneID:50853_VILL	ENCODEcCRE,Ensembl104,dbSUPER	NG_061444.1	Homo_sapiens
NC_000003.12	38275237	38275532	RefSeqFE_enhancer_GeneID:112935930	CDS-overlapping,exon-overlapping,gene-overlapping	protein_coding_GeneID:9390_SLC22A13	Ensembl104	NG_061446.1	Homo_sapiens
NC_000003.12	38531395	38534541	RefSeqFE_enhancer_GeneID:110121286	intergenic_gene_5prime-distal	.	ENCODEcCRE,Ensembl104,VISTA,dbSUPER	NG_053901.1	Homo_sapiens
NC_000003.12	38542666	38545253	RefSeqFE_enhancer_GeneID:110121287	intergenic_gene_5prime-distal	.	ENCODEcCRE,Ensembl104,FANTOM5,VISTA,dbSUPER	NG_053902.1	Homo_sapiens
NC_000003.12	38578361	38581496	RefSeqFE_enhancer_GeneID:110121269	CDS-overlapping,exon-overlapping,gene-overlapping	protein_coding_GeneID:6331_SCN5A[ClinVar_submission_gene,LRG_gene,RSG_gene]	ENCODEcCRE,Ensembl104,VISTA	NG_053884.1	Homo_sapiens
NC_000003.12	38722135	38726916	RefSeqFE_enhancer_GeneID:110121288	gene-overlapping,intronic	protein_coding_GeneID:6336_SCN10A[ClinVar_submission_gene,RSG_gene]	ENCODEcCRE,Ensembl104,VISTA	NG_053903.1	Homo_sapiens
NC_000003.12	39639220	39639720	RefSeqFE_enhancer_GeneID:111365149	intergenic_gene_5prime-distal	.	ENCODEcCRE,Ensembl104,FANTOM5	NG_055684.1	Homo_sapiens
NC_000003.12	39639398	39639543	RefSeqFE_enhancer_GeneID:111365149	intergenic_gene_5prime-distal	.	ENCODEcCRE,Ensembl104,FANTOM5	NG_055684.1	Homo_sapiens
NC_000003.12	39639465	39639476	RefSeqFE_transcriptional_cis_regulatory_region_GeneID:111365149	intergenic_gene_5prime-distal	.	ENCODEcCRE,Ensembl104,FANTOM5	NG_055684.1	Homo_sapiens
NC_000003.12	40457137	40457432	RefSeqFE_enhancer_GeneID:112935933	UTR-overlapping,exon-overlapping,gene-overlapping	protein_coding_GeneID:9045_RPL14	ENCODEcCRE,Ensembl104,dbSUPER	NG_061449.1	Homo_sapiens
NC_000003.12	41026577	41026872	RefSeqFE_enhancer_GeneID:112935934	intergenic_gene_5prime-distal	.	ENCODEcCRE,Ensembl104	NG_061450.1	Homo_sapiens
NC_000003.12	41115137	41115432	RefSeqFE_enhancer_GeneID:112935935	intergenic_gene_5prime-distal	.	ENCODEcCRE,Ensembl104	NG_061451.1	Homo_sapiens
NC_000003.12	42732296	42732591	RefSeqFE_enhancer_GeneID:112935936	gene-overlapping,intronic	protein_coding_GeneID:152206_CCDC13	ENCODEcCRE,Ensembl104,dbSUPER	NG_061452.1	Homo_sapiens
NC_000003.12	42732296	42732591	RefSeqFE_silencer_GeneID:112935936	gene-overlapping,intronic	protein_coding_GeneID:152206_CCDC13	ENCODEcCRE,Ensembl104,dbSUPER	NG_061452.1	Homo_sapiens
NC_000003.12	42823396	42823691	RefSeqFE_enhancer_GeneID:112935937	gene-overlapping,intronic	protein_coding_GeneID:1238_ACKR2	ENCODEcCRE,Ensembl104,dbSUPER	NG_061453.1	Homo_sapiens
NC_000003.12	42880976	42881271	RefSeqFE_enhancer_GeneID:112935938	intergenic_gene_5prime-distal	.	ENCODEcCRE,Ensembl104,FANTOM5	NG_061454.1	Homo_sapiens
NC_000003.12	43179056	43179351	RefSeqFE_enhancer_GeneID:111828516	intergenic_gene_5prime-distal	.	ENCODEcCRE,FANTOM5,dbSUPER	NG_056244.1	Homo_sapiens
NC_000003.12	43179116	43179411	RefSeqFE_enhancer_GeneID:111828516	intergenic_gene_5prime-distal	.	ENCODEcCRE,FANTOM5,dbSUPER	NG_056244.1	Homo_sapiens
NC_000003.12	43455156	43455451	RefSeqFE_enhancer_GeneID:112935941	UTR-overlapping,exon-overlapping,gene-overlapping	lncRNA_GeneID:107986080_LOC107986080[ClinVar_submission_gene,RSG_gene],protein_coding_GeneID:55129_ANO10[ClinVar_submission_gene,RSG_gene]	ENCODEcCRE,Ensembl104	NG_061455.1	Homo_sapiens
NC_000003.12	44532876	44533171	RefSeqFE_silencer_GeneID:114004378	intergenic_gene_5prime-distal	.	ENCODEcCRE,Ensembl104	NG_063798.1	Homo_sapiens
NC_000003.12	44885596	44885891	RefSeqFE_enhancer_GeneID:112935942	gene-overlapping,intronic	protein_coding_GeneID:7047_TGM4	ENCODEcCRE,Ensembl104,dbSUPER	NG_061456.1	Homo_sapiens
NC_000003.12	45885558	45886558	RefSeqFE_promoter_GeneID:119086083	gene-overlapping,intronic	protein_coding_GeneID:10803_CCR9[ClinVar_submission_gene,RSG_gene],protein_coding_GeneID:54585_LZTFL1[ClinVar_submission_gene,RSG_gene]	ENCODEcCRE,Ensembl104,dbSUPER	NG_070885.1	Homo_sapiens
NC_000003.12	46935498	46935793	RefSeqFE_enhancer_GeneID:112935943	gene-overlapping,intronic	protein_coding_GeneID:151903_CCDC12	ENCODEcCRE,Ensembl104,dbSUPER	NG_061457.1	Homo_sapiens
NC_000003.12	47781838	47782133	RefSeqFE_enhancer_GeneID:112935944	UTR-overlapping,exon-overlapping,gene-overlapping	protein_coding_GeneID:6599_SMARCC1	ENCODEcCRE,Ensembl104	NG_061458.1	Homo_sapiens
NC_000003.12	48240978	48241273	RefSeqFE_enhancer_GeneID:112935945	CDS-overlapping,exon-overlapping,gene-overlapping	protein_coding_GeneID:51385_ZNF589	ENCODEcCRE,Ensembl104	NG_061459.1	Homo_sapiens
NC_000003.12	49134489	49134703	RefSeqFE_transcriptional_cis_regulatory_region_GeneID:115995510	intergenic_gene_5prime-proximal	.	ENCODEcCRE,Ensembl104,dbSUPER	NG_066591.1	Homo_sapiens
NC_000003.12	49349801	49349946	RefSeqFE_enhancer_GeneID:111591507	intergenic_gene_5prime-distal	.	ENCODEcCRE,dbSUPER	NG_056098.1	Homo_sapiens
NC_000003.12	49349865	49349883	RefSeqFE_transcriptional_cis_regulatory_region_GeneID:111591507	intergenic_gene_5prime-distal	.	ENCODEcCRE,dbSUPER	NG_056098.1	Homo_sapiens
NC_000003.12	49411995	49412290	RefSeqFE_enhancer_GeneID:112935946	UTR-overlapping,exon-overlapping,gene-overlapping	protein_coding_GeneID:6988_TCTA	ENCODEcCRE,Ensembl104,dbSUPER	NG_061460.1	Homo_sapiens
NC_000003.12	50599046	50602727	RefSeqFE_enhancer_GeneID:110121200	intergenic_gene_5prime-distal	.	ENCODEcCRE,Ensembl104,FANTOM5,VISTA,dbSUPER	NG_053817.1	Homo_sapiens
NC_000003.12	51538492	51538787	RefSeqFE_enhancer_GeneID:112935947	UTR-overlapping,exon-overlapping,gene-overlapping	protein_coding_GeneID:23132_RAD54L2	ENCODEcCRE,Ensembl104	NG_061461.1	Homo_sapiens
NC_000003.12	52189152	52189447	RefSeqFE_enhancer_GeneID:112935948	intergenic_gene_5prime-distal	.	ENCODEcCRE,Ensembl104,dbSUPER	NG_061462.1	Homo_sapiens
NC_000003.12	52189152	52189447	RefSeqFE_silencer_GeneID:112935948	intergenic_gene_5prime-distal	.	ENCODEcCRE,Ensembl104,dbSUPER	NG_061462.1	Homo_sapiens
NC_000003.12	52210732	52211027	RefSeqFE_enhancer_GeneID:112935949	gene-overlapping,intronic	protein_coding_GeneID:211_ALAS1	ENCODEcCRE,Ensembl104,dbSUPER	NG_061463.1	Homo_sapiens
NC_000003.12	52427965	52431115	RefSeqFE_enhancer_GeneID:110121270	intergenic_gene_5prime-distal	.	ENCODEcCRE,Ensembl104,VISTA	NG_053885.1	Homo_sapiens
NC_000003.12	53194172	53194467	RefSeqFE_enhancer_GeneID:112935950	intergenic_gene_5prime-distal	.	ENCODEcCRE,dbSUPER	NG_061464.1	Homo_sapiens
NC_000003.12	53269877	53270754	RefSeqFE_transcriptional_cis_regulatory_region_GeneID:115995511	UTR-overlapping,exon-overlapping,gene-overlapping	lncRNA_GeneID:107986087_LOC107986087	ENCODEcCRE,Ensembl104,dbSUPER	NG_066592.1	Homo_sapiens
NC_000003.12	53478821	53479116	RefSeqFE_silencer_GeneID:114004379	intergenic_gene_5prime-distal	.	ENCODEcCRE,Ensembl104,dbSUPER	NG_063799.1	Homo_sapiens
NC_000003.12	54188181	54188476	RefSeqFE_silencer_GeneID:114004380	gene-overlapping,intronic	protein_coding_GeneID:55799_CACNA2D3[ClinVar_submission_gene]	Ensembl104	NG_063800.1	Homo_sapiens
NC_000003.12	54983447	54984533	RefSeqFE_enhancer_GeneID:110121103	gene-overlapping,intronic	protein_coding_GeneID:55799_CACNA2D3[ClinVar_submission_gene]	ENCODEcCRE,VISTA	NG_053722.1	Homo_sapiens
NC_000003.12	55490514	55492232	RefSeqFE_enhancer_GeneID:110121117	UTR-overlapping,exon-overlapping,gene-overlapping	protein_coding_GeneID:7474_WNT5A[ClinVar_submission_gene,RSG_gene]	ENCODEcCRE,Ensembl104,VISTA,dbSUPER	NG_053736.1	Homo_sapiens
NC_000003.12	57007580	57007875	RefSeqFE_enhancer_GeneID:112935951	gene-overlapping,intronic	protein_coding_GeneID:50650_ARHGEF3	ENCODEcCRE,dbSUPER	NG_061465.1	Homo_sapiens
NC_000003.12	57959776	57960334	RefSeqFE_enhancer_GeneID:108281142	UTR-overlapping,exon-overlapping,gene-overlapping	lncRNA_GeneID:105377104_LOC105377104	ENCODEcCRE,FANTOM5,dbSUPER	NG_051098.1	Homo_sapiens
NC_000003.12	57959899	57960223	RefSeqFE_CAGE_cluster_GeneID:108281142	UTR-overlapping,exon-overlapping,gene-overlapping	lncRNA_GeneID:105377104_LOC105377104	ENCODEcCRE,FANTOM5,dbSUPER	NG_051098.1	Homo_sapiens
NC_000003.12	57974820	57975115	RefSeqFE_CAGE_cluster_GeneID:108281136	gene-overlapping,intronic	lncRNA_GeneID:105377104_LOC105377104	ENCODEcCRE,Ensembl104,FANTOM5,dbSUPER	NG_051087.1	Homo_sapiens
NC_000003.12	57974825	57975362	RefSeqFE_enhancer_GeneID:108281136	gene-overlapping,intronic	lncRNA_GeneID:105377104_LOC105377104	ENCODEcCRE,Ensembl104,FANTOM5,dbSUPER	NG_051087.1	Homo_sapiens
NC_000003.12	58052341	58052636	RefSeqFE_enhancer_GeneID:112935952	gene-overlapping,intronic	protein_coding_GeneID:2317_FLNB[ClinVar_submission_gene,RSG_gene]	ENCODEcCRE,FANTOM5,dbSUPER	NG_061466.1	Homo_sapiens
NC_000003.12	58161761	58162056	RefSeqFE_enhancer_GeneID:112935953	gene-overlapping,intronic	protein_coding_GeneID:2317_FLNB[ClinVar_submission_gene,RSG_gene]	ENCODEcCRE,Ensembl104,dbSUPER	NG_061467.1	Homo_sapiens
NC_000003.12	58165581	58165876	RefSeqFE_silencer_GeneID:114004381	UTR-overlapping,exon-overlapping,gene-overlapping	lncRNA_GeneID:105377105_FLNB-AS1[ClinVar_submission_gene,RSG_gene],protein_coding_GeneID:2317_FLNB[ClinVar_submission_gene,RSG_gene]	ENCODEcCRE,Ensembl104,dbSUPER	NG_063801.1	Homo_sapiens
NC_000003.12	60475684	60478681	RefSeqFE_origin_of_replication_GeneID:107325936	gene-overlapping,intronic	protein_coding_GeneID:2272_FHIT[ClinVar_submission_gene,RSG_gene]	.	NG_046767.1	Homo_sapiens
NC_000003.12	60475979	60476106	RefSeqFE_origin_of_replication_GeneID:107325936	gene-overlapping,intronic	protein_coding_GeneID:2272_FHIT[ClinVar_submission_gene,RSG_gene]	.	NG_046767.1	Homo_sapiens
NC_000003.12	60487040	60489997	RefSeqFE_origin_of_replication_GeneID:107325936	gene-overlapping,intronic	protein_coding_GeneID:2272_FHIT[ClinVar_submission_gene,RSG_gene]	.	NG_046767.1	Homo_sapiens
NC_000003.12	60487904	60489370	RefSeqFE_origin_of_replication_GeneID:107325936	gene-overlapping,intronic	protein_coding_GeneID:2272_FHIT[ClinVar_submission_gene,RSG_gene]	.	NG_046767.1	Homo_sapiens
NC_000003.12	60501429	60502516	RefSeqFE_origin_of_replication_GeneID:107325936	gene-overlapping,intronic	protein_coding_GeneID:2272_FHIT[ClinVar_submission_gene,RSG_gene]	ENCODEcCRE	NG_046767.1	Homo_sapiens
NC_000003.12	60501930	60502859	RefSeqFE_origin_of_replication_GeneID:107325936	gene-overlapping,intronic	protein_coding_GeneID:2272_FHIT[ClinVar_submission_gene,RSG_gene]	.	NG_046767.1	Homo_sapiens
NC_000003.12	60505666	60507048	RefSeqFE_origin_of_replication_GeneID:107325936	gene-overlapping,intronic	protein_coding_GeneID:2272_FHIT[ClinVar_submission_gene,RSG_gene]	.	NG_046767.1	Homo_sapiens
NC_000003.12	60509876	60510714	RefSeqFE_origin_of_replication_GeneID:107325936	gene-overlapping,intronic	protein_coding_GeneID:2272_FHIT[ClinVar_submission_gene,RSG_gene]	.	NG_046767.1	Homo_sapiens
NC_000003.12	61251254	61251549	RefSeqFE_enhancer_GeneID:112935954	UTR-overlapping,exon-overlapping,gene-overlapping	protein_coding_GeneID:2272_FHIT[ClinVar_submission_gene,RSG_gene]	ENCODEcCRE,Ensembl104	NG_061468.1	Homo_sapiens
NC_000003.12	61985034	61985329	RefSeqFE_enhancer_GeneID:112935955	gene-overlapping,intronic	protein_coding_GeneID:5793_PTPRG	ENCODEcCRE,Ensembl104	NG_061470.1	Homo_sapiens
NC_000003.12	62365050	62366043	RefSeqFE_enhancer_GeneID:110120681	intergenic_gene_5prime-distal	.	ENCODEcCRE,Ensembl104,VISTA	NG_053307.1	Homo_sapiens
NC_000003.12	62374190	62374896	RefSeqFE_enhancer_GeneID:110120682	UTR-overlapping,exon-overlapping,gene-overlapping	lncRNA_GeneID:105377647_LOC105377647	ENCODEcCRE,Ensembl104,VISTA	NG_053308.1	Homo_sapiens
NC_000003.12	62420141	62422424	RefSeqFE_enhancer_GeneID:110121053	gene-overlapping,intronic	protein_coding_GeneID:8618_CADPS[ClinVar_submission_gene,RSG_gene]	ENCODEcCRE,Ensembl104,VISTA	NG_053673.1	Homo_sapiens
NC_000003.12	63687151	63689110	RefSeqFE_enhancer_GeneID:110121087	intergenic_gene_5prime-distal	.	ENCODEcCRE,Ensembl104,VISTA	NG_053707.1	Homo_sapiens
NC_000003.12	63912684	63912716	RefSeqFE_tandem_repeat_GeneID:108660406	CDS-overlapping,exon-overlapping,gene-overlapping	protein_coding_GeneID:6314_ATXN7[ClinVar_submission_gene,RSG_gene]	Ensembl104,dbSUPER	NG_051540.1	Homo_sapiens
NC_000003.12	63912685	63912715	RefSeqFE_repeat_instability_region_GeneID:108660406	CDS-overlapping,exon-overlapping,gene-overlapping	protein_coding_GeneID:6314_ATXN7[ClinVar_submission_gene,RSG_gene]	Ensembl104,dbSUPER	NG_051540.1	Homo_sapiens
NC_000003.12	66463148	66463293	RefSeqFE_enhancer_GeneID:111562376	gene-overlapping,intronic	protein_coding_GeneID:26018_LRIG1	ENCODEcCRE,Ensembl104,dbSUPER	NG_056072.1	Homo_sapiens
NC_000003.12	66463214	66463228	RefSeqFE_transcriptional_cis_regulatory_region_GeneID:111562376	gene-overlapping,intronic	protein_coding_GeneID:26018_LRIG1	ENCODEcCRE,dbSUPER	NG_056072.1	Homo_sapiens
NC_000003.12	68064254	68065171	RefSeqFE_enhancer_GeneID:108167314	gene-overlapping,intronic	protein_coding_GeneID:407738_TAFA1	.	NG_050904.1	Homo_sapiens
NC_000003.12	68064551	68064629	RefSeqFE_conserved_region_GeneID:108167314	gene-overlapping,intronic	protein_coding_GeneID:407738_TAFA1	.	NG_050904.1	Homo_sapiens
NC_000003.12	69724727	69725590	RefSeqFE_transcriptional_cis_regulatory_region_GeneID:111589208	intergenic_gene_5prime-distal	.	ENCODEcCRE,Ensembl104	NG_056079.2	Homo_sapiens
NC_000003.12	69724818	69724963	RefSeqFE_enhancer_GeneID:111589208	intergenic_gene_5prime-distal	.	ENCODEcCRE,Ensembl104	NG_056079.2	Homo_sapiens
NC_000003.12	69724885	69724896	RefSeqFE_transcriptional_cis_regulatory_region_GeneID:111589208	intergenic_gene_5prime-distal	.	ENCODEcCRE,Ensembl104	NG_056079.2	Homo_sapiens
NC_000003.12	69737257	69739600	RefSeqFE_promoter_GeneID:107988042	intergenic_gene_5prime-proximal	.	ENCODEcCRE,Ensembl104	NG_050804.1	Homo_sapiens
NC_000003.12	69738981	69739023	RefSeqFE_protein_binding_site_paired_box_2_GeneID:107988042	intergenic_gene_5prime-proximal	.	ENCODEcCRE,Ensembl104	NG_050804.1	Homo_sapiens
NC_000003.12	69738981	69739023	RefSeqFE_protein_binding_site_paired_box_6_GeneID:107988042	intergenic_gene_5prime-proximal	.	ENCODEcCRE,Ensembl104	NG_050804.1	Homo_sapiens
NC_000003.12	69864075	69866278	RefSeqFE_promoter_GeneID:107988044	gene-overlapping,intronic	protein_coding_GeneID:4286_MITF[ClinVar_submission_gene,LRG_gene,RSG_gene]	ENCODEcCRE,Ensembl104,dbSUPER	NG_050805.1	Homo_sapiens
NC_000003.12	69866091	69866193	RefSeqFE_transcriptional_cis_regulatory_region_GeneID:107988044	gene-overlapping,intronic	protein_coding_GeneID:4286_MITF[ClinVar_submission_gene,LRG_gene,RSG_gene]	ENCODEcCRE,Ensembl104,dbSUPER	NG_050805.1	Homo_sapiens
NC_000003.12	69922034	69923440	RefSeqFE_enhancer_GeneID:107988038	gene-overlapping,intronic	protein_coding_GeneID:4286_MITF[ClinVar_submission_gene,LRG_gene,RSG_gene]	ENCODEcCRE,dbSUPER	NG_050803.1	Homo_sapiens
NC_000003.12	69922489	69922786	RefSeqFE_enhancer_GeneID:107988038	gene-overlapping,intronic	protein_coding_GeneID:4286_MITF[ClinVar_submission_gene,LRG_gene,RSG_gene]	ENCODEcCRE,dbSUPER	NG_050803.1	Homo_sapiens
NC_000003.12	69922756	69922786	RefSeqFE_protein_binding_site_SRY-box_10_GeneID:107988038	gene-overlapping,intronic	protein_coding_GeneID:4286_MITF[ClinVar_submission_gene,LRG_gene,RSG_gene]	ENCODEcCRE,dbSUPER	NG_050803.1	Homo_sapiens
NC_000003.12	69934397	69934427	RefSeqFE_protein_binding_site_one_cut_homeobox_2_GeneID:107988030	gene-overlapping,intronic	protein_coding_GeneID:4286_MITF[ClinVar_submission_gene,LRG_gene,RSG_gene]	dbSUPER	NG_050802.1	Homo_sapiens
NC_000003.12	69934445	69936205	RefSeqFE_transcriptional_cis_regulatory_region_GeneID:107988030	gene-overlapping,intronic	protein_coding_GeneID:4286_MITF[ClinVar_submission_gene,LRG_gene,RSG_gene]	dbSUPER	NG_050802.1	Homo_sapiens
NC_000003.12	69934445	69936685	RefSeqFE_promoter_GeneID:107988030	gene-overlapping,intronic	protein_coding_GeneID:4286_MITF[ClinVar_submission_gene,LRG_gene,RSG_gene]	ENCODEcCRE,dbSUPER	NG_050802.1	Homo_sapiens
NC_000003.12	69936295	69936315	RefSeqFE_protein_binding_site_SRY-box_10_GeneID:107988030	gene-overlapping,intronic	protein_coding_GeneID:4286_MITF[ClinVar_submission_gene,LRG_gene,RSG_gene]	ENCODEcCRE,dbSUPER	NG_050802.1	Homo_sapiens
NC_000003.12	69936315	69936328	RefSeqFE_protein_binding_site_SRY-box_10_GeneID:107988030	gene-overlapping,intronic	protein_coding_GeneID:4286_MITF[ClinVar_submission_gene,LRG_gene,RSG_gene]	ENCODEcCRE,dbSUPER	NG_050802.1	Homo_sapiens
NC_000003.12	69936322	69936348	RefSeqFE_protein_binding_site_paired_box_3_GeneID:107988030	gene-overlapping,intronic	protein_coding_GeneID:4286_MITF[ClinVar_submission_gene,LRG_gene,RSG_gene]	ENCODEcCRE,dbSUPER	NG_050802.1	Homo_sapiens
NC_000003.12	69936349	69936379	RefSeqFE_protein_binding_site_SRY-box_10_GeneID:107988030	gene-overlapping,intronic	protein_coding_GeneID:4286_MITF[ClinVar_submission_gene,LRG_gene,RSG_gene]	ENCODEcCRE,dbSUPER	NG_050802.1	Homo_sapiens
NC_000003.12	69936360	69936402	RefSeqFE_protein_binding_site_lymphoid_enhancer_binding_factor_1_GeneID:107988030	gene-overlapping,intronic	protein_coding_GeneID:4286_MITF[ClinVar_submission_gene,LRG_gene,RSG_gene]	ENCODEcCRE,dbSUPER	NG_050802.1	Homo_sapiens
NC_000003.12	69936378	69936397	RefSeqFE_protein_binding_site_SRY-box_10_GeneID:107988030	gene-overlapping,intronic	protein_coding_GeneID:4286_MITF[ClinVar_submission_gene,LRG_gene,RSG_gene]	ENCODEcCRE,dbSUPER	NG_050802.1	Homo_sapiens
NC_000003.12	69936433	69936453	RefSeqFE_protein_binding_site_cAMP_responsive_element_binding_protein_1_GeneID:107988030	gene-overlapping,intronic	protein_coding_GeneID:4286_MITF[ClinVar_submission_gene,LRG_gene,RSG_gene]	ENCODEcCRE,dbSUPER	NG_050802.1	Homo_sapiens
NC_000003.12	69936449	69936479	RefSeqFE_protein_binding_site_one_cut_homeobox_2_GeneID:107988030	gene-overlapping,intronic	protein_coding_GeneID:4286_MITF[ClinVar_submission_gene,LRG_gene,RSG_gene]	ENCODEcCRE,dbSUPER	NG_050802.1	Homo_sapiens
NC_000003.12	69936532	69936559	RefSeqFE_protein_binding_site_POU_class_3_homeobox_2_GeneID:107988030	gene-overlapping,intronic	protein_coding_GeneID:4286_MITF[ClinVar_submission_gene,LRG_gene,RSG_gene]	ENCODEcCRE,dbSUPER	NG_050802.1	Homo_sapiens
NC_000003.12	69936706	69936727	RefSeqFE_protein_binding_site_SRY-box_10_GeneID:107988030	CDS-overlapping,exon-overlapping,gene-overlapping	protein_coding_GeneID:4286_MITF[ClinVar_submission_gene,LRG_gene,RSG_gene]	dbSUPER	NG_050802.1	Homo_sapiens
NC_000003.12	70264457	70264752	RefSeqFE_enhancer_GeneID:112935956	gene-overlapping,intronic	protein_coding_GeneID:107986096_MDFIC2	ENCODEcCRE,Ensembl104	NG_061471.1	Homo_sapiens
NC_000003.12	70985237	70986279	RefSeqFE_enhancer_GeneID:110120791	gene-overlapping,intronic	protein_coding_GeneID:27086_FOXP1[ClinVar_submission_gene,RSG_gene]	Ensembl104,VISTA,dbSUPER	NG_053416.1	Homo_sapiens
NC_000003.12	71050005	71051700	RefSeqFE_enhancer_GeneID:110120812	gene-overlapping,intronic	protein_coding_GeneID:27086_FOXP1[ClinVar_submission_gene,RSG_gene]	ENCODEcCRE,FANTOM5,VISTA,dbSUPER	NG_053437.1	Homo_sapiens
NC_000003.12	71104404	71105902	RefSeqFE_enhancer_GeneID:110120986	gene-overlapping,intronic	protein_coding_GeneID:27086_FOXP1[ClinVar_submission_gene,RSG_gene]	ENCODEcCRE,VISTA,dbSUPER	NG_053607.1	Homo_sapiens
NC_000003.12	71228160	71229805	RefSeqFE_enhancer_GeneID:110120720	gene-overlapping,intronic	protein_coding_GeneID:27086_FOXP1[ClinVar_submission_gene,RSG_gene]	ENCODEcCRE,VISTA,dbSUPER	NG_053345.1	Homo_sapiens
NC_000003.12	71241266	71243433	RefSeqFE_enhancer_GeneID:110120604	gene-overlapping,intronic	protein_coding_GeneID:27086_FOXP1[ClinVar_submission_gene,RSG_gene]	ENCODEcCRE,Ensembl104,VISTA,dbSUPER	NG_053232.1	Homo_sapiens
NC_000003.12	71397675	71399658	RefSeqFE_enhancer_GeneID:110120994	gene-overlapping,intronic	protein_coding_GeneID:27086_FOXP1[ClinVar_submission_gene,RSG_gene]	ENCODEcCRE,Ensembl104,FANTOM5,VISTA,dbSUPER	NG_053615.1	Homo_sapiens
NC_000003.12	71524455	71525389	RefSeqFE_enhancer_GeneID:110121007	gene-overlapping,intronic	protein_coding_GeneID:27086_FOXP1[ClinVar_submission_gene,RSG_gene]	ENCODEcCRE,Ensembl104,VISTA,dbSUPER	NG_053628.1	Homo_sapiens
NC_000003.12	72288826	72290063	RefSeqFE_transcriptional_cis_regulatory_region_GeneID:115995512	gene-overlapping,intronic	lncRNA_GeneID:105377158_LOC105377158	ENCODEcCRE,FANTOM5,dbSUPER	NG_066593.1	Homo_sapiens
NC_000003.12	72462717	72463012	RefSeqFE_enhancer_GeneID:112935957	gene-overlapping,intronic	lncRNA_GeneID:105377160_LOC105377160	Ensembl104	NG_061472.1	Homo_sapiens
NC_000003.12	72462717	72463012	RefSeqFE_silencer_GeneID:112935957	gene-overlapping,intronic	lncRNA_GeneID:105377160_LOC105377160	Ensembl104	NG_061472.1	Homo_sapiens
NC_000003.12	73051837	73052132	RefSeqFE_enhancer_GeneID:112935958	gene-overlapping,intronic	protein_coding_GeneID:151987_PPP4R2	ENCODEcCRE,Ensembl104	NG_061473.1	Homo_sapiens
NC_000003.12	73192077	73192372	RefSeqFE_enhancer_GeneID:112935959	gene-overlapping,intronic	lncRNA_GeneID:107986098_LOC107986098	ENCODEcCRE,Ensembl104	NG_061474.1	Homo_sapiens
NC_000003.12	75432877	75433172	RefSeqFE_enhancer_GeneID:112935961	gene-overlapping,intronic	transcribed_pseudogene_GeneID:692099_FAM86DP	ENCODEcCRE	NG_061476.1	Homo_sapiens
NC_000003.12	78993127	78995903	RefSeqFE_enhancer_GeneID:110121119	gene-overlapping,intronic	protein_coding_GeneID:6091_ROBO1[ClinVar_submission_gene,RSG_gene]	ENCODEcCRE,Ensembl104,VISTA	NG_053738.1	Homo_sapiens
NC_000003.12	78993514	78993659	RefSeqFE_enhancer_GeneID:110121119	gene-overlapping,intronic	protein_coding_GeneID:6091_ROBO1[ClinVar_submission_gene,RSG_gene]	ENCODEcCRE,Ensembl104,VISTA	NG_053738.1	Homo_sapiens
NC_000003.12	78993579	78993593	RefSeqFE_transcriptional_cis_regulatory_region_GeneID:110121119	gene-overlapping,intronic	protein_coding_GeneID:6091_ROBO1[ClinVar_submission_gene,RSG_gene]	ENCODEcCRE,Ensembl104,VISTA	NG_053738.1	Homo_sapiens
NC_000003.12	80547550	80555612	RefSeqFE_enhancer_GeneID:110121240	gene-overlapping,intronic	lncRNA_GeneID:105377177_LOC105377177	Ensembl104,VISTA	NG_053855.1	Homo_sapiens
NC_000003.12	81985957	81986252	RefSeqFE_enhancer_GeneID:112935962	UTR-overlapping,exon-overlapping,gene-overlapping	lncRNA_GeneID:105377180_LINC02008	ENCODEcCRE,Ensembl104	NG_061477.1	Homo_sapiens
NC_000003.12	87798013	87798334	RefSeqFE_transcriptional_cis_regulatory_region_GeneID:115995513	gene-overlapping,intronic	protein_coding_GeneID:3355_HTR1F	ENCODEcCRE,Ensembl104,dbSUPER	NG_066594.1	Homo_sapiens
NC_000003.12	87801554	87801742	RefSeqFE_transcriptional_cis_regulatory_region_GeneID:115995514	gene-overlapping,intronic	protein_coding_GeneID:3355_HTR1F	ENCODEcCRE,Ensembl104,dbSUPER	NG_066595.1	Homo_sapiens
NC_000003.12	94332173	94334985	RefSeqFE_enhancer_GeneID:110121113	intergenic_gene_5prime-distal	.	VISTA	NG_053732.1	Homo_sapiens
NC_000003.12	95923544	95923839	RefSeqFE_enhancer_GeneID:112935964	intergenic_gene_5prime-distal	.	ENCODEcCRE	NG_061480.1	Homo_sapiens
NC_000003.12	98039344	98039639	RefSeqFE_enhancer_GeneID:112935965	intergenic_gene_5prime-distal	.	ENCODEcCRE,Ensembl104	NG_061481.1	Homo_sapiens
NC_000003.12	99878044	99878339	RefSeqFE_enhancer_GeneID:112935966	gene-overlapping,intronic	protein_coding_GeneID:11259_FILIP1L,protein_coding_GeneID:84319_CMSS1	ENCODEcCRE,FANTOM5,dbSUPER	NG_061482.1	Homo_sapiens
NC_000003.12	101530269	101530818	RefSeqFE_transcriptional_cis_regulatory_region_GeneID:115995515	intergenic_gene_5prime-distal	.	ENCODEcCRE,Ensembl104,dbSUPER	NG_066596.1	Homo_sapiens
NC_000003.12	101779024	101779319	RefSeqFE_enhancer_GeneID:112841610	UTR-overlapping,exon-overlapping,gene-overlapping	protein_coding_GeneID:91775_NXPE3[ClinVar_submission_gene,RSG_gene]	ENCODEcCRE,Ensembl104,dbSUPER	NG_061343.1	Homo_sapiens
NC_000003.12	101849204	101849499	RefSeqFE_enhancer_GeneID:112841611	gene-overlapping,intronic	protein_coding_GeneID:64332_NFKBIZ	ENCODEcCRE,Ensembl104,dbSUPER	NG_061344.1	Homo_sapiens
NC_000003.12	102667317	102669538	RefSeqFE_enhancer_GeneID:110121116	UTR-overlapping,exon-overlapping,gene-overlapping	lncRNA_GeneID:105374016_LOC105374016	VISTA	NG_053735.1	Homo_sapiens
NC_000003.12	107367301	107367596	RefSeqFE_enhancer_GeneID:112848341	intergenic_gene_5prime-distal	.	ENCODEcCRE,Ensembl104	NG_061345.1	Homo_sapiens
NC_000003.12	108104249	108104804	RefSeqFE_transcriptional_cis_regulatory_region_GeneID:115995516	gene-overlapping,intronic	lncRNA_GeneID:105374031_LOC105374031	ENCODEcCRE,Ensembl104,dbSUPER	NG_066597.1	Homo_sapiens
NC_000003.12	112419745	112419895	RefSeqFE_mobile_genetic_element_GeneID:108004531	intergenic_gene_5prime-distal	.	.	NG_050855.1	Homo_sapiens
NC_000003.12	112419838	112419960	RefSeqFE_non_allelic_homologous_recombination_region_GeneID:108004531	intergenic_gene_5prime-distal	.	.	NG_050855.1	Homo_sapiens
NC_000003.12	112419874	112422911	RefSeqFE_mobile_genetic_element_GeneID:108004531	intergenic_gene_5prime-distal	.	.	NG_050855.1	Homo_sapiens
NC_000003.12	112419959	112420012	RefSeqFE_non_allelic_homologous_recombination_region_GeneID:108004531	intergenic_gene_5prime-distal	.	.	NG_050855.1	Homo_sapiens
NC_000003.12	112420175	112420230	RefSeqFE_non_allelic_homologous_recombination_region_GeneID:108004531	intergenic_gene_5prime-distal	.	.	NG_050855.1	Homo_sapiens
NC_000003.12	112420462	112420491	RefSeqFE_non_allelic_homologous_recombination_region_GeneID:108004531	intergenic_gene_5prime-distal	.	.	NG_050855.1	Homo_sapiens
NC_000003.12	112420521	112420588	RefSeqFE_non_allelic_homologous_recombination_region_GeneID:108004531	intergenic_gene_5prime-distal	.	.	NG_050855.1	Homo_sapiens
NC_000003.12	112420705	112420764	RefSeqFE_non_allelic_homologous_recombination_region_GeneID:108004531	intergenic_gene_5prime-distal	.	.	NG_050855.1	Homo_sapiens
NC_000003.12	112421129	112421139	RefSeqFE_non_allelic_homologous_recombination_region_GeneID:108004531	intergenic_gene_5prime-distal	.	.	NG_050855.1	Homo_sapiens
NC_000003.12	112770101	112770396	RefSeqFE_enhancer_GeneID:112848343	intergenic_gene_5prime-distal	.	ENCODEcCRE,Ensembl104,dbSUPER	NG_061347.1	Homo_sapiens
NC_000003.12	113092646	113097560	RefSeqFE_enhancer_GeneID:110121187	gene-overlapping,intronic	lncRNA_GeneID:107986114_LOC107986114	ENCODEcCRE,Ensembl104,FANTOM5,VISTA	NG_053805.1	Homo_sapiens
NC_000003.12	114237140	114238854	RefSeqFE_mobile_genetic_element_GeneID:111255649	UTR-overlapping,exon-overlapping,gene-overlapping	protein_coding_GeneID:7634_ZNF80	Ensembl104,dbSUPER	NG_055596.1	Homo_sapiens
NC_000003.12	114237524	114239397	RefSeqFE_promoter_GeneID:111255649	intergenic_gene_5prime-proximal	.	Ensembl104	NG_055596.1	Homo_sapiens
NC_000003.12	114714336	114716568	RefSeqFE_enhancer_GeneID:110120631	gene-overlapping,intronic	protein_coding_GeneID:26137_ZBTB20[ClinVar_submission_gene,RSG_gene]	ENCODEcCRE,Ensembl104,VISTA	NG_053258.1	Homo_sapiens
NC_000003.12	115217482	115219382	RefSeqFE_enhancer_GeneID:110121175	gene-overlapping,intronic	lncRNA_GeneID:101926886_LOC101926886	ENCODEcCRE,Ensembl104,VISTA	NG_053793.1	Homo_sapiens
NC_000003.12	115795687	115795834	RefSeqFE_mobile_genetic_element_GeneID:108004532	intergenic_gene_5prime-distal	.	dbSUPER	NG_050856.1	Homo_sapiens
NC_000003.12	115795777	115795899	RefSeqFE_non_allelic_homologous_recombination_region_GeneID:108004532	intergenic_gene_5prime-distal	.	dbSUPER	NG_050856.1	Homo_sapiens
NC_000003.12	115795813	115798714	RefSeqFE_mobile_genetic_element_GeneID:108004532	intergenic_gene_5prime-distal	.	dbSUPER	NG_050856.1	Homo_sapiens
NC_000003.12	115795898	115795951	RefSeqFE_non_allelic_homologous_recombination_region_GeneID:108004532	intergenic_gene_5prime-distal	.	dbSUPER	NG_050856.1	Homo_sapiens
NC_000003.12	115796113	115796169	RefSeqFE_non_allelic_homologous_recombination_region_GeneID:108004532	intergenic_gene_5prime-distal	.	dbSUPER	NG_050856.1	Homo_sapiens
NC_000003.12	115796213	115796241	RefSeqFE_non_allelic_homologous_recombination_region_GeneID:108004532	intergenic_gene_5prime-distal	.	dbSUPER	NG_050856.1	Homo_sapiens
NC_000003.12	115796272	115796339	RefSeqFE_non_allelic_homologous_recombination_region_GeneID:108004532	intergenic_gene_5prime-distal	.	dbSUPER	NG_050856.1	Homo_sapiens
NC_000003.12	115796456	115796515	RefSeqFE_non_allelic_homologous_recombination_region_GeneID:108004532	intergenic_gene_5prime-distal	.	dbSUPER	NG_050856.1	Homo_sapiens
NC_000003.12	115796880	115796890	RefSeqFE_non_allelic_homologous_recombination_region_GeneID:108004532	intergenic_gene_5prime-distal	.	dbSUPER	NG_050856.1	Homo_sapiens
NC_000003.12	119557921	119558216	RefSeqFE_enhancer_GeneID:112848344	gene-overlapping,intronic	protein_coding_GeneID:941_CD80	ENCODEcCRE,Ensembl104,dbSUPER	NG_061348.1	Homo_sapiens
NC_000003.12	119557921	119558216	RefSeqFE_silencer_GeneID:112848344	gene-overlapping,intronic	protein_coding_GeneID:941_CD80	ENCODEcCRE,Ensembl104,dbSUPER	NG_061348.1	Homo_sapiens
NC_000003.12	120094661	120094956	RefSeqFE_enhancer_GeneID:112872290	UTR-overlapping,exon-overlapping,gene-overlapping	protein_coding_GeneID:2932_GSK3B[RSG_gene]	ENCODEcCRE,Ensembl104,dbSUPER	NG_061349.1	Homo_sapiens
NC_000003.12	120572117	120572338	RefSeqFE_transcriptional_cis_regulatory_region_GeneID:115995517	intergenic_gene_5prime-distal	.	Ensembl104	NG_066598.1	Homo_sapiens
NC_000003.12	120742501	120742796	RefSeqFE_enhancer_GeneID:112872291	UTR-overlapping,exon-overlapping,gene-overlapping	protein_coding_GeneID:285282_RABL3,protein_coding_GeneID:2960_GTF2E1	ENCODEcCRE,Ensembl104	NG_061350.1	Homo_sapiens
NC_000003.12	121545841	121546136	RefSeqFE_enhancer_GeneID:112872292	CDS-overlapping,exon-overlapping,gene-overlapping	protein_coding_GeneID:10721_POLQ	ENCODEcCRE,Ensembl104	NG_061351.1	Homo_sapiens
NC_000003.12	121995361	121995656	RefSeqFE_enhancer_GeneID:112872293	gene-overlapping,intronic	protein_coding_GeneID:286676_ILDR1[ClinVar_submission_gene,RSG_gene]	ENCODEcCRE,Ensembl104,FANTOM5	NG_061352.1	Homo_sapiens
NC_000003.12	122365643	122365788	RefSeqFE_enhancer_GeneID:111365173	gene-overlapping,intronic	protein_coding_GeneID:131076_MIX23	ENCODEcCRE	NG_055760.1	Homo_sapiens
NC_000003.12	122365708	122365722	RefSeqFE_transcriptional_cis_regulatory_region_GeneID:111365173	gene-overlapping,intronic	protein_coding_GeneID:131076_MIX23	ENCODEcCRE	NG_055760.1	Homo_sapiens
NC_000003.12	123807861	123808156	RefSeqFE_enhancer_GeneID:112872294	gene-overlapping,intronic	protein_coding_GeneID:4638_MYLK[ClinVar_submission_gene,RSG_gene]	ENCODEcCRE,Ensembl104,FANTOM5,dbSUPER	NG_061353.1	Homo_sapiens
NC_000003.12	123807861	123808156	RefSeqFE_silencer_GeneID:112872294	gene-overlapping,intronic	protein_coding_GeneID:4638_MYLK[ClinVar_submission_gene,RSG_gene]	ENCODEcCRE,Ensembl104,FANTOM5,dbSUPER	NG_061353.1	Homo_sapiens
NC_000003.12	125014644	125014939	RefSeqFE_enhancer_GeneID:112872295	CDS-overlapping,exon-overlapping,gene-overlapping	protein_coding_GeneID:57493_HEG1	dbSUPER	NG_061354.1	Homo_sapiens
NC_000003.12	125579620	125579765	RefSeqFE_enhancer_GeneID:111562374	gene-overlapping,intronic	protein_coding_GeneID:114885_OSBPL11	.	NG_056070.1	Homo_sapiens
NC_000003.12	125579685	125579699	RefSeqFE_transcriptional_cis_regulatory_region_GeneID:111562374	gene-overlapping,intronic	protein_coding_GeneID:114885_OSBPL11	.	NG_056070.1	Homo_sapiens
NC_000003.12	126184605	126184900	RefSeqFE_enhancer_GeneID:112872296	gene-overlapping,intronic	lncRNA_GeneID:100862662_ALDH1L1-AS2[RSG_gene],protein_coding_GeneID:10840_ALDH1L1[RSG_gene]	ENCODEcCRE,Ensembl104	NG_061355.1	Homo_sapiens
NC_000003.12	126752205	126752500	RefSeqFE_enhancer_GeneID:111828514	gene-overlapping,intronic	protein_coding_GeneID:84303_CHCHD6	ENCODEcCRE,Ensembl104	NG_056242.1	Homo_sapiens
NC_000003.12	126752265	126752560	RefSeqFE_enhancer_GeneID:111828514	gene-overlapping,intronic	protein_coding_GeneID:84303_CHCHD6	ENCODEcCRE,Ensembl104	NG_056242.1	Homo_sapiens
NC_000003.12	127002185	127002480	RefSeqFE_enhancer_GeneID:112872297	gene-overlapping,intronic	protein_coding_GeneID:5361_PLXNA1	ENCODEcCRE,Ensembl104,FANTOM5,dbSUPER	NG_061356.1	Homo_sapiens
NC_000003.12	127746652	127747164	RefSeqFE_enhancer_GeneID:108192211	UTR-overlapping,exon-overlapping,gene-overlapping	lncRNA_GeneID:107986127_LOC107986127,protein_coding_GeneID:11343_MGLL	ENCODEcCRE,Ensembl104,FANTOM5,dbSUPER	NG_050961.1	Homo_sapiens
NC_000003.12	127746733	127747032	RefSeqFE_CAGE_cluster_GeneID:108192211	UTR-overlapping,exon-overlapping,gene-overlapping	lncRNA_GeneID:107986127_LOC107986127,protein_coding_GeneID:11343_MGLL	ENCODEcCRE,Ensembl104,FANTOM5,dbSUPER	NG_050961.1	Homo_sapiens
NC_000003.12	128052001	128052618	RefSeqFE_transcriptional_cis_regulatory_region_GeneID:117011629	UTR-overlapping,exon-overlapping,gene-overlapping	lncRNA_GeneID:102723759_LOC102723759[ClinVar_submission_gene,RSG_gene],protein_coding_GeneID:29927_SEC61A1[ClinVar_submission_gene,RSG_gene]	ENCODEcCRE,Ensembl104,dbSUPER	NG_068094.1	Homo_sapiens
NC_000003.12	128195301	128195842	RefSeqFE_transcriptional_cis_regulatory_region_GeneID:117038769	gene-overlapping,intronic	protein_coding_GeneID:60678_EEFSEC	ENCODEcCRE,Ensembl104	NG_068095.1	Homo_sapiens
NC_000003.12	128411601	128411787	RefSeqFE_transcriptional_cis_regulatory_region_GeneID:115995518	gene-overlapping,intronic	protein_coding_GeneID:60678_EEFSEC	ENCODEcCRE,Ensembl104,dbSUPER	NG_066599.1	Homo_sapiens
NC_000003.12	128412520	128413816	RefSeqFE_transcriptional_cis_regulatory_region_GeneID:115995519	gene-overlapping,intronic	protein_coding_GeneID:60678_EEFSEC	ENCODEcCRE,Ensembl104,dbSUPER	NG_066600.1	Homo_sapiens
NC_000003.12	128414281	128414349	RefSeqFE_transcriptional_cis_regulatory_region_GeneID:115995520	gene-overlapping,intronic	protein_coding_GeneID:60678_EEFSEC	Ensembl104,dbSUPER	NG_066601.1	Homo_sapiens
NC_000003.12	128415174	128417575	RefSeqFE_transcriptional_cis_regulatory_region_GeneID:115995521	gene-overlapping,intronic	protein_coding_GeneID:60678_EEFSEC	ENCODEcCRE,Ensembl104,FANTOM5,dbSUPER	NG_066602.1	Homo_sapiens
NC_000003.12	128426281	128426962	RefSeqFE_transcriptional_cis_regulatory_region_GeneID:117038770	intergenic_gene_5prime-distal	.	ENCODEcCRE,Ensembl104,dbSUPER	NG_068096.1	Homo_sapiens
NC_000003.12	128487670	128489452	RefSeqFE_transcriptional_cis_regulatory_region_GeneID:117038771	UTR-overlapping,exon-overlapping,gene-overlapping	lncRNA_GeneID:101927167_GATA2-AS1[ClinVar_submission_gene,LRG_gene,RSG_gene],protein_coding_GeneID:2624_GATA2[ClinVar_submission_gene,LRG_gene,RSG_gene]	ENCODEcCRE,Ensembl104,dbSUPER	NG_068097.1	Homo_sapiens
NC_000003.12	128532861	128533362	RefSeqFE_transcriptional_cis_regulatory_region_GeneID:117038772	intergenic_gene_5prime-distal	.	ENCODEcCRE,Ensembl104	NG_068098.1	Homo_sapiens
NC_000003.12	128592005	128592300	RefSeqFE_enhancer_GeneID:112872298	intergenic_gene_5prime-distal	.	ENCODEcCRE,Ensembl104,FANTOM5	NG_061357.1	Homo_sapiens
NC_000003.12	128813145	128813440	RefSeqFE_enhancer_GeneID:112872299	CDS-overlapping,exon-overlapping,gene-overlapping	protein_coding_GeneID:7879_RAB7A[ClinVar_submission_gene,LRG_gene,RSG_gene]	dbSUPER	NG_061358.1	Homo_sapiens
NC_000003.12	129172572	129172732	RefSeqFE_nucleotide_motif_GeneID:108644431	gene-overlapping,intronic	protein_coding_GeneID:7555_CNBP[RSG_gene]	dbSUPER	NG_051500.1	Homo_sapiens
NC_000003.12	129172576	129172659	RefSeqFE_tandem_repeat_GeneID:108644431	gene-overlapping,intronic	protein_coding_GeneID:7555_CNBP[RSG_gene]	dbSUPER	NG_051500.1	Homo_sapiens
NC_000003.12	129172624	129172656	RefSeqFE_repeat_instability_region_GeneID:108644431	gene-overlapping,intronic	protein_coding_GeneID:7555_CNBP[RSG_gene]	dbSUPER	NG_051500.1	Homo_sapiens
NC_000003.12	129172659	129172695	RefSeqFE_tandem_repeat_GeneID:108644431	gene-overlapping,intronic	protein_coding_GeneID:7555_CNBP[RSG_gene]	dbSUPER	NG_051500.1	Homo_sapiens
NC_000003.12	129172695	129172733	RefSeqFE_tandem_repeat_GeneID:108644431	gene-overlapping,intronic	protein_coding_GeneID:7555_CNBP[RSG_gene]	dbSUPER	NG_051500.1	Homo_sapiens
NC_000003.12	129211978	129212123	RefSeqFE_enhancer_GeneID:111556160	intergenic_gene_5prime-distal	.	ENCODEcCRE,Ensembl104,dbSUPER	NG_056062.1	Homo_sapiens
NC_000003.12	129212045	129212056	RefSeqFE_transcriptional_cis_regulatory_region_GeneID:111556160	intergenic_gene_5prime-distal	.	ENCODEcCRE,Ensembl104,dbSUPER	NG_056062.1	Homo_sapiens
NC_000003.12	129245621	129246162	RefSeqFE_transcriptional_cis_regulatory_region_GeneID:117038773	intergenic_gene_5prime-distal	.	ENCODEcCRE,Ensembl104,FANTOM5,dbSUPER	NG_068099.1	Homo_sapiens
NC_000003.12	129305621	129306122	RefSeqFE_transcriptional_cis_regulatory_region_GeneID:117038774	UTR-overlapping,exon-overlapping,gene-overlapping	protein_coding_GeneID:56941_HMCES	ENCODEcCRE,Ensembl104,dbSUPER	NG_068100.1	Homo_sapiens
NC_000003.12	129448345	129448640	RefSeqFE_enhancer_GeneID:112872300	gene-overlapping,intronic	protein_coding_GeneID:55764_IFT122[ClinVar_submission_gene,RSG_gene]	ENCODEcCRE,Ensembl104,FANTOM5,dbSUPER	NG_061359.1	Homo_sapiens
NC_000003.12	129526729	129526833	RefSeqFE_conserved_region_GeneID:107966124	intergenic_gene_5prime-proximal	.	Ensembl104	NG_050698.1	Homo_sapiens
NC_000003.12	129526762	129526806	RefSeqFE_conserved_region_GeneID:107966124	intergenic_gene_5prime-proximal	.	Ensembl104	NG_050698.1	Homo_sapiens
NC_000003.12	129558765	129559060	RefSeqFE_enhancer_GeneID:112872301	gene-overlapping,intronic	protein_coding_GeneID:23129_PLXND1	ENCODEcCRE,Ensembl104,dbSUPER	NG_061360.1	Homo_sapiens
NC_000003.12	129614925	129615220	RefSeqFE_enhancer_GeneID:112872302	intergenic_gene_5prime-distal	.	ENCODEcCRE,FANTOM5,dbSUPER	NG_061361.1	Homo_sapiens
NC_000003.12	129623585	129623880	RefSeqFE_enhancer_GeneID:112872303	intergenic_gene_5prime-distal	.	ENCODEcCRE,Ensembl104,dbSUPER	NG_061363.1	Homo_sapiens
NC_000003.12	129690301	129690822	RefSeqFE_transcriptional_cis_regulatory_region_GeneID:112872304	gene-overlapping,intronic	protein_coding_GeneID:23023_TMCC1	ENCODEcCRE,FANTOM5,dbSUPER	NG_061364.2	Homo_sapiens
NC_000003.12	129690385	129690680	RefSeqFE_enhancer_GeneID:112872304	gene-overlapping,intronic	protein_coding_GeneID:23023_TMCC1	ENCODEcCRE,FANTOM5,dbSUPER	NG_061364.2	Homo_sapiens
NC_000003.12	133038084	133038379	RefSeqFE_enhancer_GeneID:112903836	intergenic_gene_5prime-proximal	.	ENCODEcCRE,Ensembl104	NG_061367.1	Homo_sapiens
NC_000003.12	133041264	133041559	RefSeqFE_enhancer_GeneID:112903835	gene-overlapping,intronic	protein_coding_GeneID:66000_TMEM108	ENCODEcCRE,Ensembl104,FANTOM5	NG_061366.1	Homo_sapiens
NC_000003.12	133670502	133670647	RefSeqFE_enhancer_GeneID:111365202	gene-overlapping,intronic	protein_coding_GeneID:7018_TF[ClinVar_submission_gene,RSG_gene]	ENCODEcCRE,Ensembl104	NG_055817.1	Homo_sapiens
NC_000003.12	133670568	133670582	RefSeqFE_transcriptional_cis_regulatory_region_GeneID:111365202	gene-overlapping,intronic	protein_coding_GeneID:7018_TF[ClinVar_submission_gene,RSG_gene]	ENCODEcCRE,Ensembl104	NG_055817.1	Homo_sapiens
NC_000003.12	134224204	134224499	RefSeqFE_enhancer_GeneID:112903837	gene-overlapping,intronic	protein_coding_GeneID:6259_RYK[ClinVar_submission_gene,RSG_gene]	ENCODEcCRE,Ensembl104	NG_061368.1	Homo_sapiens
NC_000003.12	136213366	136213661	RefSeqFE_enhancer_GeneID:112903838	intergenic_gene_5prime-distal	.	.	NG_061369.1	Homo_sapiens
NC_000003.12	137013777	137014790	RefSeqFE_transcriptional_cis_regulatory_region_GeneID:115995522	intergenic_gene_5prime-distal	.	ENCODEcCRE,Ensembl104	NG_066603.1	Homo_sapiens
NC_000003.12	137263864	137265333	RefSeqFE_enhancer_GeneID:110120612	intergenic_gene_5prime-distal	.	ENCODEcCRE,Ensembl104,VISTA	NG_053240.1	Homo_sapiens
NC_000003.12	137328701	137330429	RefSeqFE_enhancer_GeneID:110120613	intergenic_gene_5prime-distal	.	ENCODEcCRE,VISTA	NG_053241.1	Homo_sapiens
NC_000003.12	137348779	137350083	RefSeqFE_enhancer_GeneID:110120614	intergenic_gene_5prime-distal	.	ENCODEcCRE,VISTA	NG_053242.1	Homo_sapiens
NC_000003.12	137467121	137468024	RefSeqFE_enhancer_GeneID:110120732	intergenic_gene_5prime-distal	.	VISTA	NG_053357.1	Homo_sapiens
NC_000003.12	137763409	137764741	RefSeqFE_promoter_GeneID:108281117	UTR-overlapping,exon-overlapping,gene-overlapping	protein_coding_GeneID:8403_SOX14[ClinVar_submission_gene,RSG_gene]	ENCODEcCRE,Ensembl104	NG_051061.1	Homo_sapiens
NC_000003.12	137764063	137764741	RefSeqFE_promoter_GeneID:108281117	UTR-overlapping,exon-overlapping,gene-overlapping	protein_coding_GeneID:8403_SOX14[ClinVar_submission_gene,RSG_gene]	ENCODEcCRE,Ensembl104	NG_051061.1	Homo_sapiens
NC_000003.12	137764152	137764255	RefSeqFE_protein_binding_site_nuclear_transcription_factor_Y_GeneID:108281117	intergenic_gene_5prime-proximal	.	ENCODEcCRE	NG_051061.1	Homo_sapiens
NC_000003.12	137920068	137921266	RefSeqFE_enhancer_GeneID:110120785	intergenic_gene_5prime-distal	.	VISTA	NG_053410.1	Homo_sapiens
NC_000003.12	138875635	138876369	RefSeqFE_transcriptional_cis_regulatory_region_GeneID:115995523	intergenic_gene_5prime-distal	.	ENCODEcCRE,Ensembl104,FANTOM5,dbSUPER	NG_066604.1	Homo_sapiens
NC_000003.12	139344126	139344421	RefSeqFE_enhancer_GeneID:112903839	CDS-overlapping,exon-overlapping,gene-overlapping	protein_coding_GeneID:56945_MRPS22[ClinVar_submission_gene,RSG_gene]	ENCODEcCRE,Ensembl104	NG_061370.1	Homo_sapiens
NC_000003.12	139772646	139772941	RefSeqFE_enhancer_GeneID:112903840	intergenic_gene_5prime-distal	.	ENCODEcCRE,FANTOM5,dbSUPER	NG_061371.1	Homo_sapiens
NC_000003.12	141848707	141848852	RefSeqFE_transcriptional_cis_regulatory_region_GeneID:115995524	intergenic_gene_5prime-distal	.	ENCODEcCRE,Ensembl104	NG_066605.1	Homo_sapiens
NC_000003.12	141848999	141849859	RefSeqFE_transcriptional_cis_regulatory_region_GeneID:115995525	intergenic_gene_5prime-distal	.	ENCODEcCRE,Ensembl104	NG_066606.1	Homo_sapiens
NC_000003.12	141860620	141861968	RefSeqFE_enhancer_GeneID:110121244	UTR-overlapping,exon-overlapping,gene-overlapping	lncRNA_GeneID:105374134_LOC105374134	ENCODEcCRE,Ensembl104,VISTA	NG_053859.1	Homo_sapiens
NC_000003.12	142285206	142285501	RefSeqFE_enhancer_GeneID:112903842	intergenic_gene_5prime-distal	.	ENCODEcCRE,Ensembl104	NG_061373.1	Homo_sapiens
NC_000003.12	143084841	143085490	RefSeqFE_transcriptional_cis_regulatory_region_GeneID:115995526	gene-overlapping,intronic	lncRNA_GeneID:105374138_LOC105374138	ENCODEcCRE,Ensembl104	NG_066607.1	Homo_sapiens
NC_000003.12	147331748	147333313	RefSeqFE_enhancer_GeneID:110120615	intergenic_gene_5prime-distal	.	VISTA	NG_053243.1	Homo_sapiens
NC_000003.12	147407358	147408549	RefSeqFE_enhancer_GeneID:110120973	intergenic_gene_5prime-proximal	.	ENCODEcCRE,Ensembl104,FANTOM5,VISTA,dbSUPER	NG_053594.1	Homo_sapiens
NC_000003.12	147660759	147662816	RefSeqFE_enhancer_GeneID:110121014	intergenic_gene_5prime-distal	.	ENCODEcCRE,VISTA	NG_053635.1	Homo_sapiens
NC_000003.12	147845621	147848817	RefSeqFE_enhancer_GeneID:110121146	intergenic_gene_5prime-distal	.	Ensembl104,VISTA	NG_053764.1	Homo_sapiens
NC_000003.12	147933888	147935649	RefSeqFE_enhancer_GeneID:110121033	intergenic_gene_5prime-distal	.	ENCODEcCRE,VISTA	NG_053654.1	Homo_sapiens
NC_000003.12	148083227	148084382	RefSeqFE_enhancer_GeneID:110120733	gene-overlapping,intronic	lncRNA_GeneID:100507461_LINC02032	ENCODEcCRE,VISTA	NG_053358.1	Homo_sapiens
NC_000003.12	148084569	148085799	RefSeqFE_enhancer_GeneID:110121026	gene-overlapping,intronic	lncRNA_GeneID:100507461_LINC02032	ENCODEcCRE,Ensembl104,VISTA	NG_053647.1	Homo_sapiens
NC_000003.12	148158241	148158536	RefSeqFE_enhancer_GeneID:112935896	intergenic_gene_5prime-distal	.	Ensembl104	NG_061375.1	Homo_sapiens
NC_000003.12	148288711	148290023	RefSeqFE_enhancer_GeneID:110120993	gene-overlapping,intronic	lncRNA_GeneID:105374149_LINC02046	VISTA	NG_053614.1	Homo_sapiens
NC_000003.12	148602313	148602458	RefSeqFE_enhancer_GeneID:111464993	intergenic_gene_5prime-distal	.	ENCODEcCRE,Ensembl104,FANTOM5	NG_055909.1	Homo_sapiens
NC_000003.12	148602379	148602393	RefSeqFE_transcriptional_cis_regulatory_region_GeneID:111464993	intergenic_gene_5prime-distal	.	ENCODEcCRE,Ensembl104,FANTOM5	NG_055909.1	Homo_sapiens
NC_000003.12	150038921	150039216	RefSeqFE_enhancer_GeneID:112935897	intergenic_gene_5prime-distal	.	ENCODEcCRE,Ensembl104	NG_061376.1	Homo_sapiens
NC_000003.12	150371861	150372156	RefSeqFE_enhancer_GeneID:112935898	intergenic_gene_5prime-distal	.	ENCODEcCRE,dbSUPER	NG_061377.1	Homo_sapiens
NC_000003.12	150729664	150730057	RefSeqFE_transcriptional_cis_regulatory_region_GeneID:115995527	intergenic_gene_5prime-distal	.	ENCODEcCRE,Ensembl104,dbSUPER	NG_066608.1	Homo_sapiens
NC_000003.12	150733305	150733997	RefSeqFE_transcriptional_cis_regulatory_region_GeneID:115995528	intergenic_gene_5prime-distal	.	ENCODEcCRE,Ensembl104,FANTOM5,dbSUPER	NG_066609.1	Homo_sapiens
NC_000003.12	152976279	152976692	RefSeqFE_transcriptional_cis_regulatory_region_GeneID:115995529	intergenic_gene_5prime-distal	.	ENCODEcCRE,Ensembl104	NG_066610.1	Homo_sapiens
NC_000003.12	153023919	153024214	RefSeqFE_enhancer_GeneID:112935899	intergenic_gene_5prime-distal	.	Ensembl104	NG_061378.1	Homo_sapiens
NC_000003.12	154324379	154324674	RefSeqFE_enhancer_GeneID:112935900	CDS-overlapping,exon-overlapping,gene-overlapping	protein_coding_GeneID:170506_DHX36	ENCODEcCRE,Ensembl104	NG_061379.1	Homo_sapiens
NC_000003.12	156812539	156812834	RefSeqFE_enhancer_GeneID:112935901	gene-overlapping,intronic	lncRNA_GeneID:730091_LINC00886	ENCODEcCRE,FANTOM5,dbSUPER	NG_061380.1	Homo_sapiens
NC_000003.12	157247165	157253098	RefSeqFE_enhancer_GeneID:114827843	UTR-overlapping,exon-overlapping,gene-overlapping	lncRNA_GeneID:101928236_LOC101928236,lncRNA_GeneID:105374179_LOC105374179	ENCODEcCRE,Ensembl104,VISTA,dbSUPER	NG_065199.1	Homo_sapiens
NC_000003.12	157534752	157535190	RefSeqFE_transcriptional_cis_regulatory_region_GeneID:115995530	intergenic_gene_5prime-distal	.	Ensembl104,dbSUPER	NG_066611.1	Homo_sapiens
NC_000003.12	157871436	157872574	RefSeqFE_enhancer_GeneID:110120724	intergenic_gene_5prime-distal	.	VISTA	NG_053349.1	Homo_sapiens
NC_000003.12	158057952	158060211	RefSeqFE_enhancer_GeneID:108449887	intergenic_gene_5prime-distal	.	ENCODEcCRE,Ensembl104,VISTA	NG_051325.2	Homo_sapiens
NC_000003.12	158058910	158059013	RefSeqFE_conserved_region_GeneID:108449887	intergenic_gene_5prime-distal	.	ENCODEcCRE,Ensembl104,VISTA	NG_051325.2	Homo_sapiens
NC_000003.12	158061632	158063431	RefSeqFE_enhancer_GeneID:108449887	intergenic_gene_5prime-distal	.	VISTA	NG_051325.2	Homo_sapiens
NC_000003.12	158164513	158166174	RefSeqFE_enhancer_GeneID:110120723	gene-overlapping,intronic	protein_coding_GeneID:51319_RSRC1	ENCODEcCRE,Ensembl104,VISTA	NG_053348.1	Homo_sapiens
NC_000003.12	158185520	158186853	RefSeqFE_enhancer_GeneID:110120755	gene-overlapping,intronic	protein_coding_GeneID:51319_RSRC1	ENCODEcCRE,VISTA	NG_053380.1	Homo_sapiens
NC_000003.12	158367860	158369043	RefSeqFE_enhancer_GeneID:110121092	gene-overlapping,intronic	protein_coding_GeneID:51319_RSRC1	ENCODEcCRE,Ensembl104,VISTA	NG_053712.1	Homo_sapiens
NC_000003.12	158768466	158775583	RefSeqFE_enhancer_GeneID:110121239	UTR-overlapping,exon-overlapping,gene-overlapping	misc_RNA_GeneID:100287290_LOC100287290	ENCODEcCRE,Ensembl104,FANTOM5,VISTA,dbSUPER	NG_053854.1	Homo_sapiens
NC_000003.12	168116228	168116729	RefSeqFE_transcriptional_cis_regulatory_region_GeneID:115995531	intergenic_gene_5prime-distal	.	ENCODEcCRE,Ensembl104	NG_066612.1	Homo_sapiens
NC_000003.12	169232860	169233155	RefSeqFE_enhancer_GeneID:112935904	gene-overlapping,intronic	protein_coding_GeneID:2122_MECOM[ClinVar_submission_gene,RSG_gene]	ENCODEcCRE,Ensembl104,dbSUPER	NG_061420.1	Homo_sapiens
NC_000003.12	169240544	169245156	RefSeqFE_enhancer_GeneID:110121102	gene-overlapping,intronic	protein_coding_GeneID:2122_MECOM[ClinVar_submission_gene,RSG_gene]	ENCODEcCRE,FANTOM5,VISTA,dbSUPER	NG_053721.1	Homo_sapiens
NC_000003.12	169764991	169765496	RefSeqFE_promoter_GeneID:110806306	UTR-overlapping,exon-overlapping,gene-overlapping	telomerase_RNA_GeneID:7012_TERC[ClinVar_submission_gene,LRG_gene,RSG_gene]	ENCODEcCRE,Ensembl104	NG_055509.1	Homo_sapiens
NC_000003.12	169764991	169765858	RefSeqFE_promoter_GeneID:110806306	intergenic_gene_5prime-proximal	.	ENCODEcCRE,Ensembl104	NG_055509.1	Homo_sapiens
NC_000003.12	169765024	169765042	RefSeqFE_protein_binding_site_Sp1_and_Sp3_transcription_factors_GeneID:110806306	UTR-overlapping,exon-overlapping,gene-overlapping	telomerase_RNA_GeneID:7012_TERC[ClinVar_submission_gene,LRG_gene,RSG_gene]	ENCODEcCRE,Ensembl104	NG_055509.1	Homo_sapiens
NC_000003.12	169765037	169765062	RefSeqFE_protein_binding_site_Sp1_and_Sp3_transcription_factors_GeneID:110806306	UTR-overlapping,exon-overlapping,gene-overlapping	telomerase_RNA_GeneID:7012_TERC[ClinVar_submission_gene,LRG_gene,RSG_gene]	ENCODEcCRE,Ensembl104	NG_055509.1	Homo_sapiens
NC_000003.12	169765076	169765104	RefSeqFE_protein_binding_site_Sp1_and_Sp3_transcription_factors_GeneID:110806306	intergenic_gene_5prime-proximal	.	ENCODEcCRE,Ensembl104	NG_055509.1	Homo_sapiens
NC_000003.12	169765083	169765088	RefSeqFE_TATA_box_GeneID:110806306	intergenic_gene_5prime-proximal	.	ENCODEcCRE,Ensembl104	NG_055509.1	Homo_sapiens
NC_000003.12	169765101	169765123	RefSeqFE_protein_binding_site_nuclear_transcription_factor_Y_subunits_alpha_and_beta_GeneID:110806306	intergenic_gene_5prime-proximal	.	ENCODEcCRE,Ensembl104	NG_055509.1	Homo_sapiens
NC_000003.12	169765113	169765118	RefSeqFE_CAAT_signal_GeneID:110806306	intergenic_gene_5prime-proximal	.	ENCODEcCRE,Ensembl104	NG_055509.1	Homo_sapiens
NC_000003.12	169765150	169765170	RefSeqFE_protein_binding_site_Sp1_and_Sp3_transcription_factors_GeneID:110806306	intergenic_gene_5prime-proximal	.	ENCODEcCRE,Ensembl104	NG_055509.1	Homo_sapiens
NC_000003.12	169773200	169773495	RefSeqFE_enhancer_GeneID:112935905	UTR-overlapping,exon-overlapping,gene-overlapping	protein_coding_GeneID:55892_MYNN	ENCODEcCRE,Ensembl104	NG_061421.1	Homo_sapiens
NC_000003.12	170330360	170330655	RefSeqFE_enhancer_GeneID:112935906	intergenic_gene_5prime-distal	.	ENCODEcCRE,Ensembl104,dbSUPER	NG_061423.1	Homo_sapiens
NC_000003.12	170584559	170584854	RefSeqFE_silencer_GeneID:114004375	gene-overlapping,intronic	lncRNA_GeneID:101928583_SLC7A14-AS1[ClinVar_submission_gene,RSG_gene],protein_coding_GeneID:57709_SLC7A14[ClinVar_submission_gene,RSG_gene]	ENCODEcCRE,Ensembl104,FANTOM5	NG_063795.1	Homo_sapiens
NC_000003.12	171159139	171159434	RefSeqFE_enhancer_GeneID:112935907	gene-overlapping,intronic	lncRNA_GeneID:105374216_LOC105374216[RSG_gene],protein_coding_GeneID:23043_TNIK[RSG_gene]	ENCODEcCRE,Ensembl104,dbSUPER	NG_061424.1	Homo_sapiens
NC_000003.12	171321954	171325964	RefSeqFE_enhancer_GeneID:114827826	gene-overlapping,intronic	protein_coding_GeneID:23043_TNIK[RSG_gene]	ENCODEcCRE,Ensembl104,VISTA,dbSUPER	NG_065182.1	Homo_sapiens
NC_000003.12	171470684	171471177	RefSeqFE_transcriptional_cis_regulatory_region_GeneID:115995532	intergenic_gene_5prime-distal	.	ENCODEcCRE,FANTOM5,dbSUPER	NG_066613.1	Homo_sapiens
NC_000003.12	171967354	171967499	RefSeqFE_enhancer_GeneID:111413008	gene-overlapping,intronic	lncRNA_GeneID:105374217_LOC105374217	ENCODEcCRE,FANTOM5,dbSUPER	NG_055841.1	Homo_sapiens
NC_000003.12	171967421	171967433	RefSeqFE_transcriptional_cis_regulatory_region_GeneID:111413008	gene-overlapping,intronic	lncRNA_GeneID:105374217_LOC105374217	ENCODEcCRE,FANTOM5,dbSUPER	NG_055841.1	Homo_sapiens
NC_000003.12	172103134	172103279	RefSeqFE_enhancer_GeneID:111365195	UTR-overlapping,exon-overlapping,gene-overlapping	protein_coding_GeneID:64778_FNDC3B	dbSUPER	NG_055810.1	Homo_sapiens
NC_000003.12	172103199	172103213	RefSeqFE_transcriptional_cis_regulatory_region_GeneID:111365195	UTR-overlapping,exon-overlapping,gene-overlapping	protein_coding_GeneID:64778_FNDC3B	dbSUPER	NG_055810.1	Homo_sapiens
NC_000003.12	172179858	172180153	RefSeqFE_enhancer_GeneID:112935908	gene-overlapping,intronic	protein_coding_GeneID:64778_FNDC3B	ENCODEcCRE,dbSUPER	NG_061425.1	Homo_sapiens
NC_000003.12	172289578	172289873	RefSeqFE_enhancer_GeneID:112935909	gene-overlapping,intronic	protein_coding_GeneID:64778_FNDC3B	ENCODEcCRE,Ensembl104,dbSUPER	NG_061426.1	Homo_sapiens
NC_000003.12	172711038	172711333	RefSeqFE_enhancer_GeneID:112935910	intergenic_gene_5prime-proximal	.	ENCODEcCRE,Ensembl104	NG_061427.1	Homo_sapiens
NC_000003.12	177039920	177040215	RefSeqFE_enhancer_GeneID:112935911	gene-overlapping,intronic	protein_coding_GeneID:79718_TBL1XR1[ClinVar_submission_gene,RSG_gene]	ENCODEcCRE,Ensembl104	NG_061428.1	Homo_sapiens
NC_000003.12	177359880	177360175	RefSeqFE_enhancer_GeneID:112935912	intergenic_gene_5prime-distal	.	ENCODEcCRE,FANTOM5,dbSUPER	NG_061429.1	Homo_sapiens
NC_000003.12	179301640	179302057	RefSeqFE_transcriptional_cis_regulatory_region_GeneID:115995533	intergenic_gene_5prime-distal	.	Ensembl104	NG_066614.1	Homo_sapiens
NC_000003.12	180718638	180720170	RefSeqFE_enhancer_GeneID:110120632	gene-overlapping,intronic	lncRNA_GeneID:101928882_LOC101928882	ENCODEcCRE,VISTA	NG_053259.1	Homo_sapiens
NC_000003.12	180744036	180745086	RefSeqFE_enhancer_GeneID:110120734	gene-overlapping,intronic	lncRNA_GeneID:101928882_LOC101928882	ENCODEcCRE,Ensembl104,VISTA,dbSUPER	NG_053359.1	Homo_sapiens
NC_000003.12	181055850	181058014	RefSeqFE_enhancer_GeneID:110120606	gene-overlapping,intronic	lncRNA_GeneID:347689_SOX2-OT	Ensembl104,VISTA	NG_053234.1	Homo_sapiens
NC_000003.12	181316500	181316795	RefSeqFE_silencer_GeneID:114004376	gene-overlapping,intronic	lncRNA_GeneID:347689_SOX2-OT	Ensembl104	NG_063796.1	Homo_sapiens
NC_000003.12	181707861	181708258	RefSeqFE_enhancer_GeneID:108281177	gene-overlapping,intronic	lncRNA_GeneID:347689_SOX2-OT	ENCODEcCRE,Ensembl104,dbSUPER	NG_051137.1	Homo_sapiens
NC_000003.12	181710174	181710187	RefSeqFE_protein_binding_site_high_mobility_group_AT-hook_2_GeneID:108281177	gene-overlapping,intronic	lncRNA_GeneID:347689_SOX2-OT	Ensembl104,dbSUPER	NG_051137.1	Homo_sapiens
NC_000003.12	181711152	181712186	RefSeqFE_promoter_GeneID:108281177	UTR-overlapping,exon-overlapping,gene-overlapping	lncRNA_GeneID:347689_SOX2-OT[ClinVar_submission_gene,LRG_gene,RSG_gene],protein_coding_GeneID:6657_SOX2[ClinVar_submission_gene,LRG_gene,RSG_gene]	ENCODEcCRE,Ensembl104,dbSUPER	NG_051137.1	Homo_sapiens
NC_000003.12	181711651	181711676	RefSeqFE_protein_binding_site_signal_transducer_and_activator_of_transcription_6_GeneID:108281177	gene-overlapping,intronic	lncRNA_GeneID:347689_SOX2-OT	ENCODEcCRE,Ensembl104,dbSUPER	NG_051137.1	Homo_sapiens
NC_000003.12	181716056	181716248	RefSeqFE_enhancer_GeneID:108281178	gene-overlapping,intronic	lncRNA_GeneID:347689_SOX2-OT	ENCODEcCRE,Ensembl104,dbSUPER	NG_051138.1	Homo_sapiens
NC_000003.12	182240985	182243339	RefSeqFE_enhancer_GeneID:110121064	intergenic_gene_5prime-distal	.	ENCODEcCRE,Ensembl104,FANTOM5,VISTA	NG_053684.1	Homo_sapiens
NC_000003.12	182714134	182714400	RefSeqFE_transcriptional_cis_regulatory_region_GeneID:115995534	intergenic_gene_5prime-distal	.	ENCODEcCRE,Ensembl104,dbSUPER	NG_066615.1	Homo_sapiens
NC_000003.12	182715177	182715267	RefSeqFE_transcriptional_cis_regulatory_region_GeneID:115995535	intergenic_gene_5prime-distal	.	ENCODEcCRE,dbSUPER	NG_066616.1	Homo_sapiens
NC_000003.12	183298880	183299175	RefSeqFE_enhancer_GeneID:112935913	UTR-overlapping,exon-overlapping,gene-overlapping	lncRNA_GeneID:107986160_LOC107986160,protein_coding_GeneID:23101_MCF2L2	ENCODEcCRE,dbSUPER	NG_061430.1	Homo_sapiens
NC_000003.12	185795296	185798581	RefSeqFE_enhancer_GeneID:114827824	gene-overlapping,intronic	protein_coding_GeneID:10644_IGF2BP2[RSG_gene]	ENCODEcCRE,Ensembl104,VISTA,dbSUPER	NG_065180.1	Homo_sapiens
NC_000003.12	186596939	186597234	RefSeqFE_enhancer_GeneID:112935914	UTR-overlapping,exon-overlapping,gene-overlapping	pseudogene_GeneID:100287402_LOC100287402	Ensembl104	NG_061431.1	Homo_sapiens
NC_000003.12	186840009	186840167	RefSeqFE_enhancer_GeneID:106660625	intergenic_gene_5prime-distal	.	Ensembl104	NG_044949.1	Homo_sapiens
NC_000003.12	186840076	186840083	RefSeqFE_protein_binding_site_CCAAT/enhancer_binding_protein_(C/EBP)_alpha_GeneID:106660625	intergenic_gene_5prime-distal	.	Ensembl104	NG_044949.1	Homo_sapiens
NC_000003.12	186840149	186840157	RefSeqFE_protein_binding_site_CCAAT/enhancer_binding_protein_(C/EBP)_alpha_GeneID:106660625	intergenic_gene_5prime-distal	.	Ensembl104	NG_044949.1	Homo_sapiens
NC_000003.12	186842033	186842732	RefSeqFE_promoter_GeneID:106660625	intergenic_gene_5prime-proximal	.	Ensembl104	NG_044949.1	Homo_sapiens
NC_000003.12	186842133	186842161	RefSeqFE_transcriptional_cis_regulatory_region_GeneID:106660625	intergenic_gene_5prime-proximal	.	.	NG_044949.1	Homo_sapiens
NC_000003.12	186842423	186842435	RefSeqFE_protein_binding_site_peroxisome_proliferator-activated_receptor_protein_alpha/retinoid_X_receptor_protein_alpha_heterodimer_GeneID:106660625	intergenic_gene_5prime-proximal	.	.	NG_044949.1	Homo_sapiens
NC_000003.12	186842471	186842480	RefSeqFE_protein_binding_site_nuclear_receptor_subfamily_5_group_A_member_2_protein_GeneID:106660625	intergenic_gene_5prime-proximal	.	.	NG_044949.1	Homo_sapiens
NC_000003.12	186842749	186853050	RefSeqFE_enhancer_GeneID:106660625	UTR-overlapping,exon-overlapping,gene-overlapping	lncRNA_GeneID:100874095_ADIPOQ-AS1[ClinVar_submission_gene,RSG_gene],protein_coding_GeneID:9370_ADIPOQ[ClinVar_submission_gene,RSG_gene]	ENCODEcCRE,Ensembl104	NG_044949.1	Homo_sapiens
NC_000003.12	186845792	186845813	RefSeqFE_protein_binding_site_CCAAT/enhancer_binding_protein_(C/EBP)_alpha_GeneID:106660625	gene-overlapping,intronic	protein_coding_GeneID:9370_ADIPOQ[ClinVar_submission_gene,RSG_gene]	ENCODEcCRE	NG_044949.1	Homo_sapiens
NC_000003.12	186845792	186845840	RefSeqFE_enhancer_GeneID:106660625	gene-overlapping,intronic	protein_coding_GeneID:9370_ADIPOQ[ClinVar_submission_gene,RSG_gene]	ENCODEcCRE	NG_044949.1	Homo_sapiens
NC_000003.12	186845806	186845819	RefSeqFE_protein_binding_site_CCAAT/enhancer_binding_protein_(C/EBP)_alpha_GeneID:106660625	gene-overlapping,intronic	protein_coding_GeneID:9370_ADIPOQ[ClinVar_submission_gene,RSG_gene]	ENCODEcCRE	NG_044949.1	Homo_sapiens
NC_000003.12	186845819	186845840	RefSeqFE_protein_binding_site_CCAAT/enhancer_binding_protein_(C/EBP)_alpha_GeneID:106660625	gene-overlapping,intronic	protein_coding_GeneID:9370_ADIPOQ[ClinVar_submission_gene,RSG_gene]	ENCODEcCRE	NG_044949.1	Homo_sapiens
NC_000003.12	186845905	186848724	RefSeqFE_silencer_GeneID:106660625	gene-overlapping,intronic	protein_coding_GeneID:9370_ADIPOQ[ClinVar_submission_gene,RSG_gene]	ENCODEcCRE,Ensembl104	NG_044949.1	Homo_sapiens
NC_000003.12	186848640	186848659	RefSeqFE_protein_binding_site_CCAAT/enhancer_binding_protein_(C/EBP)_alpha_GeneID:106660625	gene-overlapping,intronic	protein_coding_GeneID:9370_ADIPOQ[ClinVar_submission_gene,RSG_gene]	.	NG_044949.1	Homo_sapiens
NC_000003.12	186849297	186849316	RefSeqFE_protein_binding_site_CCAAT/enhancer_binding_protein_(C/EBP)_alpha_GeneID:106660625	gene-overlapping,intronic	protein_coding_GeneID:9370_ADIPOQ[ClinVar_submission_gene,RSG_gene]	Ensembl104	NG_044949.1	Homo_sapiens
NC_000003.12	186850599	186850618	RefSeqFE_protein_binding_site_CCAAT/enhancer_binding_protein_(C/EBP)_alpha_GeneID:106660625	gene-overlapping,intronic	protein_coding_GeneID:9370_ADIPOQ[ClinVar_submission_gene,RSG_gene]	.	NG_044949.1	Homo_sapiens
NC_000003.12	186850649	186850668	RefSeqFE_protein_binding_site_CCAAT/enhancer_binding_protein_(C/EBP)_alpha_GeneID:106660625	gene-overlapping,intronic	protein_coding_GeneID:9370_ADIPOQ[ClinVar_submission_gene,RSG_gene]	.	NG_044949.1	Homo_sapiens
NC_000003.12	186852662	186852681	RefSeqFE_protein_binding_site_CCAAT/enhancer_binding_protein_(C/EBP)_alpha_GeneID:106660625	UTR-overlapping,exon-overlapping,gene-overlapping	lncRNA_GeneID:100874095_ADIPOQ-AS1[ClinVar_submission_gene,RSG_gene],protein_coding_GeneID:9370_ADIPOQ[ClinVar_submission_gene,RSG_gene]	.	NG_044949.1	Homo_sapiens
NC_000003.12	186871296	186871900	RefSeqFE_transcriptional_cis_regulatory_region_GeneID:115995536	intergenic_gene_5prime-distal	.	ENCODEcCRE,Ensembl104	NG_066617.1	Homo_sapiens
NC_000003.12	187021401	187021979	RefSeqFE_promoter_GeneID:111242785	UTR-overlapping,exon-overlapping,gene-overlapping	protein_coding_GeneID:6480_ST6GAL1	ENCODEcCRE,Ensembl104,dbSUPER	NG_055592.1	Homo_sapiens
NC_000003.12	187021457	187021741	RefSeqFE_mobile_genetic_element_GeneID:111242785	gene-overlapping,intronic	protein_coding_GeneID:6480_ST6GAL1	ENCODEcCRE,dbSUPER	NG_055592.1	Homo_sapiens
NC_000003.12	187021803	187021967	RefSeqFE_mobile_genetic_element_GeneID:111242785	UTR-overlapping,exon-overlapping,gene-overlapping	protein_coding_GeneID:6480_ST6GAL1	ENCODEcCRE,Ensembl104,dbSUPER	NG_055592.1	Homo_sapiens
NC_000003.12	187021885	187021979	RefSeqFE_transcriptional_cis_regulatory_region_GeneID:111242785	UTR-overlapping,exon-overlapping,gene-overlapping	protein_coding_GeneID:6480_ST6GAL1	ENCODEcCRE,Ensembl104,dbSUPER	NG_055592.1	Homo_sapiens
NC_000003.12	187038295	187038755	RefSeqFE_promoter_GeneID:111242783	gene-overlapping,intronic	protein_coding_GeneID:6480_ST6GAL1	ENCODEcCRE,Ensembl104,dbSUPER	NG_055591.1	Homo_sapiens
NC_000003.12	187038558	187038739	RefSeqFE_promoter_GeneID:111242783	UTR-overlapping,exon-overlapping,gene-overlapping	protein_coding_GeneID:6480_ST6GAL1	ENCODEcCRE,Ensembl104,dbSUPER	NG_055591.1	Homo_sapiens
NC_000003.12	187038655	187038663	RefSeqFE_transcriptional_cis_regulatory_region_GeneID:111242783	gene-overlapping,intronic	protein_coding_GeneID:6480_ST6GAL1	ENCODEcCRE,Ensembl104,dbSUPER	NG_055591.1	Homo_sapiens
NC_000003.12	187038663	187038677	RefSeqFE_transcriptional_cis_regulatory_region_GeneID:111242783	gene-overlapping,intronic	protein_coding_GeneID:6480_ST6GAL1	ENCODEcCRE,Ensembl104,dbSUPER	NG_055591.1	Homo_sapiens
NC_000003.12	187038699	187038707	RefSeqFE_transcriptional_cis_regulatory_region_GeneID:111242783	gene-overlapping,intronic	protein_coding_GeneID:6480_ST6GAL1	ENCODEcCRE,Ensembl104,dbSUPER	NG_055591.1	Homo_sapiens
NC_000003.12	187038719	187038728	RefSeqFE_transcriptional_cis_regulatory_region_GeneID:111242783	UTR-overlapping,exon-overlapping,gene-overlapping	protein_coding_GeneID:6480_ST6GAL1	ENCODEcCRE,Ensembl104,dbSUPER	NG_055591.1	Homo_sapiens
NC_000003.12	187286443	187287000	RefSeqFE_enhancer_GeneID:108281160	gene-overlapping,intronic	protein_coding_GeneID:5648_MASP1[ClinVar_submission_gene,LRG_gene,RSG_gene]	ENCODEcCRE,Ensembl104,FANTOM5	NG_051120.1	Homo_sapiens
NC_000003.12	187286580	187286875	RefSeqFE_enhancer_GeneID:108281160	gene-overlapping,intronic	protein_coding_GeneID:5648_MASP1[ClinVar_submission_gene,LRG_gene,RSG_gene]	ENCODEcCRE,Ensembl104,FANTOM5	NG_051120.1	Homo_sapiens
NC_000003.12	187286713	187286835	RefSeqFE_CAGE_cluster_GeneID:108281160	gene-overlapping,intronic	protein_coding_GeneID:5648_MASP1[ClinVar_submission_gene,LRG_gene,RSG_gene]	ENCODEcCRE,Ensembl104,FANTOM5	NG_051120.1	Homo_sapiens
NC_000003.12	187986540	187986835	RefSeqFE_enhancer_GeneID:112935917	intergenic_gene_5prime-distal	.	ENCODEcCRE,Ensembl104,FANTOM5,dbSUPER	NG_061432.1	Homo_sapiens
NC_000003.12	188290640	188290935	RefSeqFE_enhancer_GeneID:112935918	gene-overlapping,intronic	protein_coding_GeneID:4026_LPP[RSG_gene]	ENCODEcCRE,Ensembl104,dbSUPER	NG_061433.1	Homo_sapiens
NC_000003.12	189630703	189631513	RefSeqFE_promoter_GeneID:111162620	UTR-overlapping,exon-overlapping,gene-overlapping	protein_coding_GeneID:8626_TP63[ClinVar_submission_gene,RSG_gene]	ENCODEcCRE,Ensembl104	NG_055551.1	Homo_sapiens
NC_000003.12	189630831	189630856	RefSeqFE_protein_binding_site_nuclear_factor_kappa_B_subunit_1_RELA_proto-oncogene_NF-kB_subunit_GeneID:111162620	gene-overlapping,intronic	protein_coding_GeneID:8626_TP63[ClinVar_submission_gene,RSG_gene]	ENCODEcCRE,Ensembl104	NG_055551.1	Homo_sapiens
NC_000003.12	189630905	189630916	RefSeqFE_transcriptional_cis_regulatory_region_GeneID:111162620	gene-overlapping,intronic	protein_coding_GeneID:8626_TP63[ClinVar_submission_gene,RSG_gene]	ENCODEcCRE,Ensembl104	NG_055551.1	Homo_sapiens
NC_000003.12	189630942	189630968	RefSeqFE_protein_binding_site_nuclear_factor_kappa_B_subunit_1_RELA_proto-oncogene_NF-kB_subunit_GeneID:111162620	gene-overlapping,intronic	protein_coding_GeneID:8626_TP63[ClinVar_submission_gene,RSG_gene]	ENCODEcCRE,Ensembl104	NG_055551.1	Homo_sapiens
NC_000003.12	189786612	189789795	RefSeqFE_promoter_GeneID:111162621	gene-overlapping,intronic	protein_coding_GeneID:8626_TP63[ClinVar_submission_gene,RSG_gene]	ENCODEcCRE,Ensembl104,dbSUPER	NG_055552.1	Homo_sapiens
NC_000003.12	189788715	189789801	RefSeqFE_promoter_GeneID:111162621	UTR-overlapping,exon-overlapping,gene-overlapping	protein_coding_GeneID:8626_TP63[ClinVar_submission_gene,RSG_gene]	ENCODEcCRE,Ensembl104,dbSUPER	NG_055552.1	Homo_sapiens
NC_000003.12	189788976	189789006	RefSeqFE_protein_binding_site_signal_transducer_and_activator_of_transcription_3_GeneID:111162621	gene-overlapping,intronic	protein_coding_GeneID:8626_TP63[ClinVar_submission_gene,RSG_gene]	Ensembl104,dbSUPER	NG_055552.1	Homo_sapiens
NC_000003.12	189789043	189789066	RefSeqFE_enhancer_GeneID:111162621	gene-overlapping,intronic	protein_coding_GeneID:8626_TP63[ClinVar_submission_gene,RSG_gene]	Ensembl104,dbSUPER	NG_055552.1	Homo_sapiens
NC_000003.12	189789043	189789066	RefSeqFE_protein_binding_site_tumor_protein_p53_GeneID:111162621	gene-overlapping,intronic	protein_coding_GeneID:8626_TP63[ClinVar_submission_gene,RSG_gene]	Ensembl104,dbSUPER	NG_055552.1	Homo_sapiens
NC_000003.12	189789043	189789066	RefSeqFE_protein_binding_site_tumor_protein_p63_GeneID:111162621	gene-overlapping,intronic	protein_coding_GeneID:8626_TP63[ClinVar_submission_gene,RSG_gene]	Ensembl104,dbSUPER	NG_055552.1	Homo_sapiens
NC_000003.12	189789487	189789700	RefSeqFE_conserved_region_GeneID:111162621	UTR-overlapping,exon-overlapping,gene-overlapping	protein_coding_GeneID:8626_TP63[ClinVar_submission_gene,RSG_gene]	ENCODEcCRE,Ensembl104,dbSUPER	NG_055552.1	Homo_sapiens
NC_000003.12	189789506	189789537	RefSeqFE_protein_binding_site_POU_class_3_homeobox_1_GeneID:111162621	gene-overlapping,intronic	protein_coding_GeneID:8626_TP63[ClinVar_submission_gene,RSG_gene]	ENCODEcCRE,Ensembl104,dbSUPER	NG_055552.1	Homo_sapiens
NC_000003.12	189789576	189789616	RefSeqFE_enhancer_GeneID:111162621	gene-overlapping,intronic	protein_coding_GeneID:8626_TP63[ClinVar_submission_gene,RSG_gene]	ENCODEcCRE,Ensembl104,dbSUPER	NG_055552.1	Homo_sapiens
NC_000003.12	190386419	190386714	RefSeqFE_enhancer_GeneID:112935919	gene-overlapping,intronic	protein_coding_GeneID:10686_CLDN16[ClinVar_submission_gene,RSG_gene]	ENCODEcCRE,FANTOM5,dbSUPER	NG_061434.1	Homo_sapiens
NC_000003.12	192513999	192514294	RefSeqFE_silencer_GeneID:114004377	gene-overlapping,intronic	protein_coding_GeneID:2257_FGF12[ClinVar_submission_gene,RSG_gene]	ENCODEcCRE,Ensembl104	NG_063797.1	Homo_sapiens
NC_000003.12	193771569	193773544	RefSeqFE_enhancer_GeneID:110121144	UTR-overlapping,exon-overlapping,gene-overlapping	lncRNA_GeneID:105374282_LOC105374282	ENCODEcCRE,Ensembl104,VISTA	NG_053762.1	Homo_sapiens
NC_000003.12	193942559	193942854	RefSeqFE_enhancer_GeneID:112935920	intergenic_gene_5prime-distal	.	ENCODEcCRE,Ensembl104	NG_061435.1	Homo_sapiens
NC_000003.12	193943027	193944689	RefSeqFE_enhancer_GeneID:110121069	intergenic_gene_5prime-distal	.	ENCODEcCRE,Ensembl104,VISTA	NG_053689.1	Homo_sapiens
NC_000003.12	193959728	193962381	RefSeqFE_enhancer_GeneID:110121110	gene-overlapping,intronic	lncRNA_GeneID:647323_LINC02026	ENCODEcCRE,Ensembl104,FANTOM5,VISTA	NG_053729.1	Homo_sapiens
NC_000003.12	194205739	194206034	RefSeqFE_enhancer_GeneID:112935921	gene-overlapping,intronic	lncRNA_GeneID:100505920_LINC02036	ENCODEcCRE,FANTOM5	NG_061436.1	Homo_sapiens
NC_000003.12	194211570	194213668	RefSeqFE_enhancer_GeneID:110121137	gene-overlapping,intronic	lncRNA_GeneID:100505920_LINC02036	ENCODEcCRE,Ensembl104,VISTA	NG_053756.1	Homo_sapiens
NC_000003.12	194722699	194722994	RefSeqFE_enhancer_GeneID:112935922	gene-overlapping,intronic	lncRNA_GeneID:100507391_LINC01968,lncRNA_GeneID:105374292_LOC105374292	ENCODEcCRE,Ensembl104	NG_061437.1	Homo_sapiens
NC_000003.12	194769199	194769494	RefSeqFE_enhancer_GeneID:112935923	gene-overlapping,intronic	lncRNA_GeneID:100507391_LINC01968,lncRNA_GeneID:105374292_LOC105374292	ENCODEcCRE,Ensembl104	NG_061438.1	Homo_sapiens
NC_000003.12	196181818	196182308	RefSeqFE_transcriptional_cis_regulatory_region_GeneID:115995537	intergenic_gene_5prime-distal	.	ENCODEcCRE,dbSUPER	NG_066618.1	Homo_sapiens
NC_000003.12	196193786	196194446	RefSeqFE_transcriptional_cis_regulatory_region_GeneID:115995538	UTR-overlapping,exon-overlapping,gene-overlapping	lncRNA_GeneID:105374303_LOC105374303	ENCODEcCRE,FANTOM5,dbSUPER	NG_066619.1	Homo_sapiens
NC_000003.12	196338477	196338772	RefSeqFE_enhancer_GeneID:112935924	intergenic_gene_5prime-proximal	.	ENCODEcCRE,Ensembl104,dbSUPER	NG_061439.1	Homo_sapiens
NC_000003.12	197541777	197542072	RefSeqFE_silencer_GeneID:111828515	gene-overlapping,intronic	protein_coding_GeneID:622_BDH1	ENCODEcCRE,Ensembl104,dbSUPER	NG_056243.1	Homo_sapiens
NC_000003.12	197541877	197542172	RefSeqFE_enhancer_GeneID:111828515	gene-overlapping,intronic	protein_coding_GeneID:622_BDH1	ENCODEcCRE,Ensembl104,dbSUPER	NG_056243.1	Homo_sapiens
NC_000003.12	197712337	197712632	RefSeqFE_enhancer_GeneID:112935925	gene-overlapping,intronic	protein_coding_GeneID:9711_RUBCN[ClinVar_submission_gene,RSG_gene]	ENCODEcCRE,FANTOM5,dbSUPER	NG_061440.1	Homo_sapiens
NC_000003.12	197718957	197719252	RefSeqFE_enhancer_GeneID:112935926	gene-overlapping,intronic	protein_coding_GeneID:9711_RUBCN[ClinVar_submission_gene,RSG_gene]	ENCODEcCRE,Ensembl104,dbSUPER	NG_061441.1	Homo_sapiens
NC_000003.12	197898046	197898053	RefSeqFE_mitotic_recombination_region_GeneID:107133517	gene-overlapping,intronic	protein_coding_GeneID:84223_IQCG[RSG_gene]	.	NG_046676.1	Homo_sapiens
NC_000004.12	1403220	1403515	RefSeqFE_silencer_GeneID:114004382	CDS-overlapping,exon-overlapping,gene-overlapping	protein_coding_GeneID:54729_NKX1-1	ENCODEcCRE,Ensembl104	NG_063802.1	Homo_sapiens
NC_000004.12	1410460	1410755	RefSeqFE_silencer_GeneID:114004383	intergenic_gene_5prime-distal	.	Ensembl104	NG_063803.1	Homo_sapiens
NC_000004.12	1611751	1612379	RefSeqFE_enhancer_GeneID:110120693	gene-overlapping,intronic	protein_coding_GeneID:152877_FAM53A	VISTA	NG_053319.1	Homo_sapiens
NC_000004.12	1784887	1786262	RefSeqFE_transcriptional_cis_regulatory_region_GeneID:116158483	intergenic_gene_5prime-distal	.	ENCODEcCRE,Ensembl104,dbSUPER	NG_066625.1	Homo_sapiens
NC_000004.12	2266869	2267922	RefSeqFE_transcriptional_cis_regulatory_region_GeneID:116158484	intergenic_gene_5prime-distal	.	ENCODEcCRE	NG_066626.1	Homo_sapiens
NC_000004.12	2811875	2812960	RefSeqFE_enhancer_GeneID:106804089	UTR-overlapping,exon-overlapping,gene-overlapping	protein_coding_GeneID:6452_SH3BP2[ClinVar_submission_gene,LRG_gene,RSG_gene]	ENCODEcCRE,Ensembl104,FANTOM5,dbSUPER	NG_046157.1	Homo_sapiens
NC_000004.12	3074876	3074939	RefSeqFE_repeat_instability_region_GeneID:109461479	CDS-overlapping,exon-overlapping,gene-overlapping	protein_coding_GeneID:3064_HTT[ClinVar_submission_gene,LRG_gene,RSG_gene]	ENCODEcCRE,Ensembl104	NG_052623.1	Homo_sapiens
NC_000004.12	3074876	3074940	RefSeqFE_tandem_repeat_GeneID:109461479	CDS-overlapping,exon-overlapping,gene-overlapping	protein_coding_GeneID:3064_HTT[ClinVar_submission_gene,LRG_gene,RSG_gene]	ENCODEcCRE,Ensembl104	NG_052623.1	Homo_sapiens
NC_000004.12	3206081	3206376	RefSeqFE_enhancer_GeneID:112939930	gene-overlapping,intronic	protein_coding_GeneID:3064_HTT[ClinVar_submission_gene,LRG_gene,RSG_gene]	ENCODEcCRE	NG_061508.1	Homo_sapiens
NC_000004.12	4259521	4259816	RefSeqFE_enhancer_GeneID:112939936	intergenic_gene_5prime-distal	.	ENCODEcCRE,Ensembl104	NG_061514.1	Homo_sapiens
NC_000004.12	4521139	4522323	RefSeqFE_enhancer_GeneID:110120757	gene-overlapping,intronic	protein_coding_GeneID:53407_STX18	ENCODEcCRE,Ensembl104,VISTA	NG_053382.1	Homo_sapiens
NC_000004.12	4541921	4542216	RefSeqFE_enhancer_GeneID:112942284	CDS-overlapping,exon-overlapping,gene-overlapping	lncRNA_GeneID:100507266_STX18-AS1,protein_coding_GeneID:53407_STX18	ENCODEcCRE,Ensembl104	NG_061515.1	Homo_sapiens
NC_000004.12	4660089	4660234	RefSeqFE_enhancer_GeneID:111519897	gene-overlapping,intronic	lncRNA_GeneID:100507266_STX18-AS1	ENCODEcCRE,Ensembl104	NG_055949.1	Homo_sapiens
NC_000004.12	4660156	4660167	RefSeqFE_transcriptional_cis_regulatory_region_GeneID:111519897	gene-overlapping,intronic	lncRNA_GeneID:100507266_STX18-AS1	ENCODEcCRE,Ensembl104	NG_055949.1	Homo_sapiens
NC_000004.12	6297013	6299211	RefSeqFE_enhancer_GeneID:110121237	gene-overlapping,intronic	protein_coding_GeneID:7466_WFS1[ClinVar_submission_gene,RSG_gene]	ENCODEcCRE,VISTA,dbSUPER	NG_053852.1	Homo_sapiens
NC_000004.12	6734481	6734776	RefSeqFE_enhancer_GeneID:112978664	intergenic_gene_5prime-distal	.	ENCODEcCRE,Ensembl104,dbSUPER	NG_061521.1	Homo_sapiens
NC_000004.12	7539741	7540036	RefSeqFE_enhancer_GeneID:112978667	gene-overlapping,intronic	protein_coding_GeneID:57537_SORCS2	ENCODEcCRE	NG_061522.1	Homo_sapiens
NC_000004.12	7782699	7782860	RefSeqFE_enhancer_GeneID:107992393	gene-overlapping,intronic	protein_coding_GeneID:60312_AFAP1	dbSUPER	NG_050845.1	Homo_sapiens
NC_000004.12	7831401	7831696	RefSeqFE_enhancer_GeneID:112978668	gene-overlapping,intronic	protein_coding_GeneID:60312_AFAP1	ENCODEcCRE,FANTOM5,dbSUPER	NG_061523.1	Homo_sapiens
NC_000004.12	8479141	8479436	RefSeqFE_enhancer_GeneID:112997536	gene-overlapping,intronic	protein_coding_GeneID:152992_TRMT44[RSG_gene]	ENCODEcCRE,Ensembl104	NG_061529.1	Homo_sapiens
NC_000004.12	10239961	10240811	RefSeqFE_transcriptional_cis_regulatory_region_GeneID:116158485	intergenic_gene_5prime-distal	.	ENCODEcCRE,Ensembl104	NG_066627.1	Homo_sapiens
NC_000004.12	12745414	12747000	RefSeqFE_enhancer_GeneID:114827818	intergenic_gene_5prime-distal	.	VISTA	NG_065174.1	Homo_sapiens
NC_000004.12	13007693	13008703	RefSeqFE_enhancer_GeneID:110120633	intergenic_gene_5prime-distal	.	VISTA	NG_053260.1	Homo_sapiens
NC_000004.12	13484224	13484519	RefSeqFE_enhancer_GeneID:111828517	UTR-overlapping,exon-overlapping,gene-overlapping	lncRNA_GeneID:105374495_LOC105374495[ClinVar_submission_gene,RSG_gene],protein_coding_GeneID:9364_RAB28[ClinVar_submission_gene,RSG_gene]	ENCODEcCRE,Ensembl104	NG_056245.1	Homo_sapiens
NC_000004.12	13484484	13484779	RefSeqFE_silencer_GeneID:111828517	UTR-overlapping,exon-overlapping,gene-overlapping	lncRNA_GeneID:105374495_LOC105374495	ENCODEcCRE,Ensembl104	NG_056245.1	Homo_sapiens
NC_000004.12	14267208	14268300	RefSeqFE_enhancer_GeneID:110120784	intergenic_gene_5prime-distal	.	ENCODEcCRE,Ensembl104,VISTA	NG_053409.1	Homo_sapiens
NC_000004.12	17494205	17494500	RefSeqFE_enhancer_GeneID:112939924	gene-overlapping,intronic	protein_coding_GeneID:5860_QDPR[ClinVar_submission_gene,RSG_gene]	ENCODEcCRE,Ensembl104,FANTOM5,dbSUPER	NG_061503.1	Homo_sapiens
NC_000004.12	22238165	22238460	RefSeqFE_enhancer_GeneID:114004385	intergenic_gene_5prime-distal	.	ENCODEcCRE,Ensembl104	NG_063805.1	Homo_sapiens
NC_000004.12	22238165	22238460	RefSeqFE_silencer_GeneID:114004385	intergenic_gene_5prime-distal	.	ENCODEcCRE,Ensembl104	NG_063805.1	Homo_sapiens
NC_000004.12	23930437	23932069	RefSeqFE_enhancer_GeneID:110121305	gene-overlapping,intronic	protein_coding_GeneID:10891_PPARGC1A[RSG_gene]	ENCODEcCRE,Ensembl104,VISTA	NG_053920.1	Homo_sapiens
NC_000004.12	24137905	24138200	RefSeqFE_enhancer_GeneID:112939928	gene-overlapping,intronic	protein_coding_GeneID:10891_PPARGC1A[RSG_gene]	ENCODEcCRE,Ensembl104	NG_061506.1	Homo_sapiens
NC_000004.12	27696286	27696581	RefSeqFE_enhancer_GeneID:112939929	gene-overlapping,intronic	lncRNA_GeneID:105374548_LOC105374548	.	NG_061507.1	Homo_sapiens
NC_000004.12	34335226	34335521	RefSeqFE_enhancer_GeneID:112939931	intergenic_gene_5prime-distal	.	Ensembl104	NG_061509.1	Homo_sapiens
NC_000004.12	37431386	37431681	RefSeqFE_enhancer_GeneID:112939932	gene-overlapping,intronic	protein_coding_GeneID:57495_NWD2	ENCODEcCRE,Ensembl104,dbSUPER	NG_061510.1	Homo_sapiens
NC_000004.12	37648272	37648417	RefSeqFE_enhancer_GeneID:111465013	gene-overlapping,intronic	protein_coding_GeneID:768211_RELL1	ENCODEcCRE,Ensembl104,dbSUPER	NG_055918.1	Homo_sapiens
NC_000004.12	37648338	37648352	RefSeqFE_transcriptional_cis_regulatory_region_GeneID:111465013	gene-overlapping,intronic	protein_coding_GeneID:768211_RELL1	ENCODEcCRE,Ensembl104,dbSUPER	NG_055918.1	Homo_sapiens
NC_000004.12	38050477	38050941	RefSeqFE_enhancer_GeneID:111721707	gene-overlapping,intronic	protein_coding_GeneID:23216_TBC1D1	ENCODEcCRE,Ensembl104,dbSUPER	NG_056151.1	Homo_sapiens
NC_000004.12	38802627	38802922	RefSeqFE_enhancer_GeneID:112939933	gene-overlapping,intronic	protein_coding_GeneID:7096_TLR1[ClinVar_submission_gene,RSG_gene]	ENCODEcCRE,dbSUPER	NG_061511.1	Homo_sapiens
NC_000004.12	39182228	39182523	RefSeqFE_enhancer_GeneID:112939934	UTR-overlapping,exon-overlapping,gene-overlapping	protein_coding_GeneID:57728_WDR19[ClinVar_submission_gene,RSG_gene]	ENCODEcCRE,Ensembl104	NG_061512.1	Homo_sapiens
NC_000004.12	39458868	39459163	RefSeqFE_enhancer_GeneID:112939935	CDS-overlapping,exon-overlapping,gene-overlapping	protein_coding_GeneID:11019_LIAS[ClinVar_submission_gene,RSG_gene],protein_coding_GeneID:6133_RPL9[ClinVar_submission_gene,RSG_gene]	ENCODEcCRE,Ensembl104,dbSUPER	NG_061513.1	Homo_sapiens
NC_000004.12	39515008	39515303	RefSeqFE_enhancer_GeneID:111365176	gene-overlapping,intronic	protein_coding_GeneID:7358_UGDH[ClinVar_submission_gene]	ENCODEcCRE,Ensembl104	NG_055763.3	Homo_sapiens
NC_000004.12	39515150	39515295	RefSeqFE_enhancer_GeneID:111365176	gene-overlapping,intronic	protein_coding_GeneID:7358_UGDH[ClinVar_submission_gene]	ENCODEcCRE,Ensembl104	NG_055763.3	Homo_sapiens
NC_000004.12	39515189	39515334	RefSeqFE_enhancer_GeneID:111365176	gene-overlapping,intronic	protein_coding_GeneID:7358_UGDH[ClinVar_submission_gene]	ENCODEcCRE,Ensembl104	NG_055763.3	Homo_sapiens
NC_000004.12	39515217	39515228	RefSeqFE_transcriptional_cis_regulatory_region_GeneID:111365176	gene-overlapping,intronic	protein_coding_GeneID:7358_UGDH[ClinVar_submission_gene]	ENCODEcCRE,Ensembl104	NG_055763.3	Homo_sapiens
NC_000004.12	39515255	39515269	RefSeqFE_transcriptional_cis_regulatory_region_GeneID:111365176	gene-overlapping,intronic	protein_coding_GeneID:7358_UGDH[ClinVar_submission_gene]	ENCODEcCRE,Ensembl104	NG_055763.3	Homo_sapiens
NC_000004.12	40418584	40418729	RefSeqFE_enhancer_GeneID:111465010	intergenic_gene_5prime-distal	.	ENCODEcCRE,Ensembl104,dbSUPER	NG_055916.1	Homo_sapiens
NC_000004.12	40418649	40418663	RefSeqFE_transcriptional_cis_regulatory_region_GeneID:111465010	intergenic_gene_5prime-distal	.	ENCODEcCRE,Ensembl104,dbSUPER	NG_055916.1	Homo_sapiens
NC_000004.12	40897591	40897886	RefSeqFE_enhancer_GeneID:112942285	gene-overlapping,intronic	protein_coding_GeneID:323_APBB2[RSG_gene]	ENCODEcCRE,Ensembl104	NG_061516.1	Homo_sapiens
NC_000004.12	41745974	41745989	RefSeqFE_repeat_instability_region_GeneID:110011216	CDS-overlapping,exon-overlapping,gene-overlapping	protein_coding_GeneID:8929_PHOX2B[ClinVar_submission_gene,LRG_gene,RSG_gene]	ENCODEcCRE	NG_053075.1	Homo_sapiens
NC_000004.12	41745975	41746022	RefSeqFE_tandem_repeat_GeneID:110011216	CDS-overlapping,exon-overlapping,gene-overlapping	protein_coding_GeneID:8929_PHOX2B[ClinVar_submission_gene,LRG_gene,RSG_gene]	ENCODEcCRE	NG_053075.1	Homo_sapiens
NC_000004.12	41745977	41745998	RefSeqFE_repeat_instability_region_GeneID:110011216	CDS-overlapping,exon-overlapping,gene-overlapping	protein_coding_GeneID:8929_PHOX2B[ClinVar_submission_gene,LRG_gene,RSG_gene]	ENCODEcCRE	NG_053075.1	Homo_sapiens
NC_000004.12	41745977	41746016	RefSeqFE_repeat_instability_region_GeneID:110011216	CDS-overlapping,exon-overlapping,gene-overlapping	protein_coding_GeneID:8929_PHOX2B[ClinVar_submission_gene,LRG_gene,RSG_gene]	ENCODEcCRE	NG_053075.1	Homo_sapiens
NC_000004.12	41745986	41746001	RefSeqFE_repeat_instability_region_GeneID:110011216	CDS-overlapping,exon-overlapping,gene-overlapping	protein_coding_GeneID:8929_PHOX2B[ClinVar_submission_gene,LRG_gene,RSG_gene]	ENCODEcCRE	NG_053075.1	Homo_sapiens
NC_000004.12	41745986	41746019	RefSeqFE_repeat_instability_region_GeneID:110011216	CDS-overlapping,exon-overlapping,gene-overlapping	protein_coding_GeneID:8929_PHOX2B[ClinVar_submission_gene,LRG_gene,RSG_gene]	ENCODEcCRE	NG_053075.1	Homo_sapiens
NC_000004.12	41745989	41745990	RefSeqFE_sequence_alteration_GeneID:110011216	CDS-overlapping,exon-overlapping,gene-overlapping	protein_coding_GeneID:8929_PHOX2B[ClinVar_submission_gene,LRG_gene,RSG_gene]	ENCODEcCRE	NG_053075.1	Homo_sapiens
NC_000004.12	41745995	41746013	RefSeqFE_repeat_instability_region_GeneID:110011216	CDS-overlapping,exon-overlapping,gene-overlapping	protein_coding_GeneID:8929_PHOX2B[ClinVar_submission_gene,LRG_gene,RSG_gene]	ENCODEcCRE	NG_053075.1	Homo_sapiens
NC_000004.12	41746010	41746028	RefSeqFE_repeat_instability_region_GeneID:110011216	CDS-overlapping,exon-overlapping,gene-overlapping	protein_coding_GeneID:8929_PHOX2B[ClinVar_submission_gene,LRG_gene,RSG_gene]	ENCODEcCRE	NG_053075.1	Homo_sapiens
NC_000004.12	42148073	42149047	RefSeqFE_enhancer_GeneID:110120787	gene-overlapping,intronic	protein_coding_GeneID:389206_BEND4	ENCODEcCRE,VISTA	NG_053412.1	Homo_sapiens
NC_000004.12	42302411	42302706	RefSeqFE_enhancer_GeneID:112942286	gene-overlapping,intronic	lncRNA_GeneID:105374428_LOC105374428	ENCODEcCRE,Ensembl104,dbSUPER	NG_061517.1	Homo_sapiens
NC_000004.12	42332191	42332486	RefSeqFE_enhancer_GeneID:112942287	gene-overlapping,intronic	lncRNA_GeneID:105374428_LOC105374428	ENCODEcCRE,Ensembl104	NG_061518.1	Homo_sapiens
NC_000004.12	46405011	46405306	RefSeqFE_enhancer_GeneID:112978663	intergenic_gene_5prime-distal	.	Ensembl104	NG_061520.1	Homo_sapiens
NC_000004.12	47824448	47826035	RefSeqFE_enhancer_GeneID:110121309	gene-overlapping,intronic	protein_coding_GeneID:10699_CORIN[ClinVar_submission_gene,RSG_gene]	ENCODEcCRE,Ensembl104,VISTA	NG_053924.1	Homo_sapiens
NC_000004.12	48481612	48482008	RefSeqFE_transcriptional_cis_regulatory_region_GeneID:116158486	intergenic_gene_5prime-proximal	.	ENCODEcCRE,Ensembl104	NG_066628.1	Homo_sapiens
NC_000004.12	52862341	52862636	RefSeqFE_silencer_GeneID:114004386	CDS-overlapping,exon-overlapping,gene-overlapping	protein_coding_GeneID:65997_RASL11B	ENCODEcCRE,Ensembl104	NG_063806.1	Homo_sapiens
NC_000004.12	53076115	53078130	RefSeqFE_enhancer_GeneID:110121183	gene-overlapping,intronic	protein_coding_GeneID:152579_SCFD2	ENCODEcCRE,VISTA	NG_053801.1	Homo_sapiens
NC_000004.12	53195306	53199113	RefSeqFE_enhancer_GeneID:110121111	gene-overlapping,intronic	protein_coding_GeneID:152579_SCFD2	ENCODEcCRE,Ensembl104,VISTA	NG_053730.1	Homo_sapiens
NC_000004.12	54015054	54016288	RefSeqFE_enhancer_GeneID:110120745	gene-overlapping,intronic	protein_coding_GeneID:26511_CHIC2[RSG_gene]	ENCODEcCRE,VISTA	NG_053370.1	Homo_sapiens
NC_000004.12	54095830	54096629	RefSeqFE_enhancer_GeneID:110120742	intergenic_gene_5prime-distal	.	VISTA	NG_053367.1	Homo_sapiens
NC_000004.12	54542486	54543098	RefSeqFE_transcriptional_cis_regulatory_region_GeneID:116158487	intergenic_gene_5prime-distal	.	FANTOM5,dbSUPER	NG_066629.1	Homo_sapiens
NC_000004.12	54571161	54571986	RefSeqFE_transcriptional_cis_regulatory_region_GeneID:116158488	intergenic_gene_5prime-distal	.	ENCODEcCRE,Ensembl104,FANTOM5	NG_066630.1	Homo_sapiens
NC_000004.12	55666538	55666736	RefSeqFE_transcriptional_cis_regulatory_region_GeneID:116158489	intergenic_gene_5prime-distal	.	.	NG_066631.1	Homo_sapiens
NC_000004.12	55723509	55723669	RefSeqFE_transcriptional_cis_regulatory_region_GeneID:116158490	intergenic_gene_5prime-distal	.	.	NG_066632.1	Homo_sapiens
NC_000004.12	55729687	55730414	RefSeqFE_transcriptional_cis_regulatory_region_GeneID:116158491	intergenic_gene_5prime-distal	.	ENCODEcCRE,Ensembl104	NG_066633.1	Homo_sapiens
NC_000004.12	55730464	55730928	RefSeqFE_transcriptional_cis_regulatory_region_GeneID:116158492	intergenic_gene_5prime-distal	.	ENCODEcCRE,Ensembl104	NG_066634.1	Homo_sapiens
NC_000004.12	55733861	55734227	RefSeqFE_transcriptional_cis_regulatory_region_GeneID:116158493	intergenic_gene_5prime-distal	.	ENCODEcCRE,Ensembl104	NG_066635.1	Homo_sapiens
NC_000004.12	56053422	56057627	RefSeqFE_enhancer_GeneID:110121177	gene-overlapping,intronic	protein_coding_GeneID:57482_CRACD	ENCODEcCRE,Ensembl104,VISTA	NG_053795.1	Homo_sapiens
NC_000004.12	66123761	66124648	RefSeqFE_enhancer_GeneID:110120783	intergenic_gene_5prime-distal	.	ENCODEcCRE,VISTA	NG_053408.1	Homo_sapiens
NC_000004.12	69098439	69098816	RefSeqFE_enhancer_GeneID:114803476	CDS-overlapping,exon-overlapping,gene-overlapping	protein_coding_GeneID:7364_UGT2B7	ENCODEcCRE,Ensembl104	NG_064652.1	Homo_sapiens
NC_000004.12	69103075	69103220	RefSeqFE_enhancer_GeneID:111589210	gene-overlapping,intronic	protein_coding_GeneID:7364_UGT2B7	ENCODEcCRE,Ensembl104	NG_056081.1	Homo_sapiens
NC_000004.12	69103141	69103153	RefSeqFE_transcriptional_cis_regulatory_region_GeneID:111589210	gene-overlapping,intronic	protein_coding_GeneID:7364_UGT2B7	.	NG_056081.1	Homo_sapiens
NC_000004.12	69832590	69832885	RefSeqFE_enhancer_GeneID:112978669	intergenic_gene_5prime-distal	.	ENCODEcCRE,FANTOM5,dbSUPER	NG_061524.1	Homo_sapiens
NC_000004.12	71856005	71859344	RefSeqFE_enhancer_GeneID:114827842	intergenic_gene_5prime-distal	.	ENCODEcCRE,VISTA	NG_065198.1	Homo_sapiens
NC_000004.12	72112551	72112846	RefSeqFE_enhancer_GeneID:112978670	gene-overlapping,intronic	protein_coding_GeneID:10886_NPFFR2	ENCODEcCRE,Ensembl104,FANTOM5,dbSUPER	NG_061525.1	Homo_sapiens
NC_000004.12	73397684	73397765	RefSeqFE_enhancer_GeneID:111832671	intergenic_gene_5prime-distal	.	ENCODEcCRE	NG_056261.1	Homo_sapiens
NC_000004.12	73402421	73402642	RefSeqFE_enhancer_GeneID:111832671	intergenic_gene_5prime-proximal	.	.	NG_056261.1	Homo_sapiens
NC_000004.12	73403180	73404342	RefSeqFE_promoter_GeneID:111832671	intergenic_gene_5prime-proximal	.	ENCODEcCRE	NG_056261.1	Homo_sapiens
NC_000004.12	73403914	73403954	RefSeqFE_enhancer_GeneID:111832671	intergenic_gene_5prime-proximal	.	.	NG_056261.1	Homo_sapiens
NC_000004.12	73403921	73404327	RefSeqFE_promoter_GeneID:111832671	UTR-overlapping,exon-overlapping,gene-overlapping	protein_coding_GeneID:213_ALB[ClinVar_submission_gene,RSG_gene]	ENCODEcCRE	NG_056261.1	Homo_sapiens
NC_000004.12	73404054	73404074	RefSeqFE_protein_binding_site_CCAAT/enhancer-binding_protein_alpha_GeneID:111832671	intergenic_gene_5prime-proximal	.	ENCODEcCRE	NG_056261.1	Homo_sapiens
NC_000004.12	73404256	73404263	RefSeqFE_TATA_box_GeneID:111832671	intergenic_gene_5prime-proximal	.	ENCODEcCRE	NG_056261.1	Homo_sapiens
NC_000004.12	73430192	73430601	RefSeqFE_enhancer_GeneID:111832670	intergenic_gene_5prime-distal	.	ENCODEcCRE	NG_056260.1	Homo_sapiens
NC_000004.12	73430404	73430429	RefSeqFE_protein_binding_site_CCAAT/enhancer_binding_proteins_alpha_and_beta_GeneID:111832670	intergenic_gene_5prime-distal	.	ENCODEcCRE	NG_056260.1	Homo_sapiens
NC_000004.12	73431542	73431552	RefSeqFE_transcriptional_cis_regulatory_region_GeneID:111832670	intergenic_gene_5prime-distal	.	.	NG_056260.1	Homo_sapiens
NC_000004.12	73431887	73431897	RefSeqFE_transcriptional_cis_regulatory_region_GeneID:111832670	intergenic_gene_5prime-distal	.	.	NG_056260.1	Homo_sapiens
NC_000004.12	73432038	73432439	RefSeqFE_enhancer_GeneID:111832670	intergenic_gene_5prime-distal	.	ENCODEcCRE,Ensembl104	NG_056260.1	Homo_sapiens
NC_000004.12	73432102	73432124	RefSeqFE_enhancer_GeneID:111832670	intergenic_gene_5prime-distal	.	Ensembl104	NG_056260.1	Homo_sapiens
NC_000004.12	73432102	73432467	RefSeqFE_enhancer_GeneID:111832670	intergenic_gene_5prime-distal	.	ENCODEcCRE,Ensembl104	NG_056260.1	Homo_sapiens
NC_000004.12	73432126	73432145	RefSeqFE_enhancer_GeneID:111832670	intergenic_gene_5prime-distal	.	Ensembl104	NG_056260.1	Homo_sapiens
NC_000004.12	73432175	73432203	RefSeqFE_enhancer_GeneID:111832670	intergenic_gene_5prime-distal	.	ENCODEcCRE,Ensembl104	NG_056260.1	Homo_sapiens
NC_000004.12	73432304	73432323	RefSeqFE_protein_binding_site_CCAAT/enhancer_binding_protein_alpha_GeneID:111832670	intergenic_gene_5prime-distal	.	ENCODEcCRE,Ensembl104	NG_056260.1	Homo_sapiens
NC_000004.12	73432304	73432325	RefSeqFE_enhancer_GeneID:111832670	intergenic_gene_5prime-distal	.	ENCODEcCRE,Ensembl104	NG_056260.1	Homo_sapiens
NC_000004.12	73432434	73432467	RefSeqFE_enhancer_GeneID:111832670	intergenic_gene_5prime-distal	.	ENCODEcCRE,Ensembl104	NG_056260.1	Homo_sapiens
NC_000004.12	73432435	73432452	RefSeqFE_protein_binding_site_CCAAT/enhancer_binding_protein_alpha_GeneID:111832670	intergenic_gene_5prime-distal	.	ENCODEcCRE,Ensembl104	NG_056260.1	Homo_sapiens
NC_000004.12	73432478	73432889	RefSeqFE_enhancer_GeneID:111832670	intergenic_gene_5prime-distal	.	ENCODEcCRE,Ensembl104	NG_056260.1	Homo_sapiens
NC_000004.12	73432478	73436247	RefSeqFE_promoter_GeneID:111832670	intergenic_gene_5prime-proximal	.	ENCODEcCRE,Ensembl104	NG_056260.1	Homo_sapiens
NC_000004.12	73432689	73432772	RefSeqFE_enhancer_GeneID:111832670	intergenic_gene_5prime-distal	.	ENCODEcCRE,Ensembl104	NG_056260.1	Homo_sapiens
NC_000004.12	73432724	73432755	RefSeqFE_protein_binding_site_HNF1_homeobox_A_GeneID:111832670	intergenic_gene_5prime-distal	.	ENCODEcCRE,Ensembl104	NG_056260.1	Homo_sapiens
NC_000004.12	73432724	73432755	RefSeqFE_protein_binding_site_inhibitor_of_growth_family_member_1_GeneID:111832670	intergenic_gene_5prime-distal	.	ENCODEcCRE,Ensembl104	NG_056260.1	Homo_sapiens
NC_000004.12	73432730	73432754	RefSeqFE_enhancer_GeneID:111832670	intergenic_gene_5prime-distal	.	ENCODEcCRE,Ensembl104	NG_056260.1	Homo_sapiens
NC_000004.12	73432730	73432923	RefSeqFE_enhancer_GeneID:111832670	intergenic_gene_5prime-distal	.	ENCODEcCRE,Ensembl104	NG_056260.1	Homo_sapiens
NC_000004.12	73432732	73432747	RefSeqFE_protein_binding_site_zinc_finger_homeobox_3_GeneID:111832670	intergenic_gene_5prime-distal	.	ENCODEcCRE,Ensembl104	NG_056260.1	Homo_sapiens
NC_000004.12	73432737	73432749	RefSeqFE_protein_binding_site_CCAAT/enhancer_binding_protein_alpha_GeneID:111832670	intergenic_gene_5prime-distal	.	ENCODEcCRE,Ensembl104	NG_056260.1	Homo_sapiens
NC_000004.12	73432773	73432790	RefSeqFE_protein_binding_site_CCAAT/enhancer_binding_protein_alpha_GeneID:111832670	intergenic_gene_5prime-distal	.	ENCODEcCRE,Ensembl104	NG_056260.1	Homo_sapiens
NC_000004.12	73432773	73432793	RefSeqFE_enhancer_GeneID:111832670	intergenic_gene_5prime-distal	.	ENCODEcCRE,Ensembl104	NG_056260.1	Homo_sapiens
NC_000004.12	73432900	73432919	RefSeqFE_protein_binding_site_CCAAT/enhancer_binding_protein_alpha_GeneID:111832670	intergenic_gene_5prime-distal	.	Ensembl104	NG_056260.1	Homo_sapiens
NC_000004.12	73432900	73432923	RefSeqFE_enhancer_GeneID:111832670	intergenic_gene_5prime-distal	.	Ensembl104	NG_056260.1	Homo_sapiens
NC_000004.12	73434397	73434804	RefSeqFE_silencer_GeneID:111832670	intergenic_gene_5prime-proximal	.	ENCODEcCRE,Ensembl104	NG_056260.1	Homo_sapiens
NC_000004.12	73434410	73434427	RefSeqFE_dispersed_repeat_GeneID:111832670	intergenic_gene_5prime-proximal	.	Ensembl104	NG_056260.1	Homo_sapiens
NC_000004.12	73434427	73434458	RefSeqFE_silencer_GeneID:111832670	intergenic_gene_5prime-proximal	.	ENCODEcCRE,Ensembl104	NG_056260.1	Homo_sapiens
NC_000004.12	73434433	73434450	RefSeqFE_dispersed_repeat_GeneID:111832670	intergenic_gene_5prime-proximal	.	ENCODEcCRE,Ensembl104	NG_056260.1	Homo_sapiens
NC_000004.12	73434447	73434464	RefSeqFE_dispersed_repeat_GeneID:111832670	intergenic_gene_5prime-proximal	.	ENCODEcCRE,Ensembl104	NG_056260.1	Homo_sapiens
NC_000004.12	73434475	73434492	RefSeqFE_dispersed_repeat_GeneID:111832670	intergenic_gene_5prime-proximal	.	ENCODEcCRE,Ensembl104	NG_056260.1	Homo_sapiens
NC_000004.12	73435818	73436050	RefSeqFE_transcriptional_cis_regulatory_region_GeneID:111832670	intergenic_gene_5prime-proximal	.	ENCODEcCRE	NG_056260.1	Homo_sapiens
NC_000004.12	73435901	73435918	RefSeqFE_dispersed_repeat_GeneID:111832670	intergenic_gene_5prime-proximal	.	.	NG_056260.1	Homo_sapiens
NC_000004.12	73435964	73436247	RefSeqFE_promoter_GeneID:111832670	intergenic_gene_5prime-proximal	.	ENCODEcCRE	NG_056260.1	Homo_sapiens
NC_000004.12	73436040	73436061	RefSeqFE_enhancer_GeneID:111832670	intergenic_gene_5prime-proximal	.	ENCODEcCRE	NG_056260.1	Homo_sapiens
NC_000004.12	73436050	73436247	RefSeqFE_enhancer_GeneID:111832670	UTR-overlapping,exon-overlapping,gene-overlapping	protein_coding_GeneID:174_AFP[RSG_gene]	ENCODEcCRE	NG_056260.1	Homo_sapiens
NC_000004.12	73436050	73436247	RefSeqFE_promoter_GeneID:111832670	UTR-overlapping,exon-overlapping,gene-overlapping	protein_coding_GeneID:174_AFP[RSG_gene]	ENCODEcCRE	NG_056260.1	Homo_sapiens
NC_000004.12	73436087	73436110	RefSeqFE_enhancer_GeneID:111832670	intergenic_gene_5prime-proximal	.	ENCODEcCRE	NG_056260.1	Homo_sapiens
NC_000004.12	73436092	73436107	RefSeqFE_protein_binding_site_HNF1_homeobox_A_GeneID:111832670	intergenic_gene_5prime-proximal	.	ENCODEcCRE	NG_056260.1	Homo_sapiens
NC_000004.12	73436092	73436108	RefSeqFE_protein_binding_site_CCAAT/enhancer_binding_protein_alpha_GeneID:111832670	intergenic_gene_5prime-proximal	.	ENCODEcCRE	NG_056260.1	Homo_sapiens
NC_000004.12	73436099	73436100	RefSeqFE_sequence_alteration_GeneID:111832670	intergenic_gene_5prime-proximal	.	ENCODEcCRE	NG_056260.1	Homo_sapiens
NC_000004.12	73436150	73436178	RefSeqFE_protein_binding_site_HNF1_homeobox_A_GeneID:111832670	intergenic_gene_5prime-proximal	.	ENCODEcCRE	NG_056260.1	Homo_sapiens
NC_000004.12	73436191	73436198	RefSeqFE_TATA_box_GeneID:111832670	intergenic_gene_5prime-proximal	.	ENCODEcCRE	NG_056260.1	Homo_sapiens
NC_000004.12	73436201	73436216	RefSeqFE_protein_binding_site_CCAAT/enhancer_binding_protein_alpha_GeneID:111832670	intergenic_gene_5prime-proximal	.	ENCODEcCRE	NG_056260.1	Homo_sapiens
NC_000004.12	74056552	74057496	RefSeqFE_transcriptional_cis_regulatory_region_GeneID:116158494	intergenic_gene_5prime-proximal	.	ENCODEcCRE,Ensembl104,FANTOM5,dbSUPER	NG_066636.1	Homo_sapiens
NC_000004.12	74057708	74057893	RefSeqFE_transcriptional_cis_regulatory_region_GeneID:116158495	intergenic_gene_5prime-distal	.	ENCODEcCRE,dbSUPER	NG_066637.1	Homo_sapiens
NC_000004.12	74191151	74191446	RefSeqFE_enhancer_GeneID:112978671	gene-overlapping,intronic	protein_coding_GeneID:441024_MTHFD2L	Ensembl104	NG_061526.1	Homo_sapiens
NC_000004.12	74330486	74330786	RefSeqFE_transcriptional_cis_regulatory_region_GeneID:116158496	intergenic_gene_5prime-distal	.	ENCODEcCRE,FANTOM5,dbSUPER	NG_066638.1	Homo_sapiens
NC_000004.12	74531891	74532186	RefSeqFE_enhancer_GeneID:111828520	intergenic_gene_5prime-distal	.	ENCODEcCRE,Ensembl104,FANTOM5,dbSUPER	NG_056246.1	Homo_sapiens
NC_000004.12	74531931	74532226	RefSeqFE_enhancer_GeneID:111828520	intergenic_gene_5prime-distal	.	ENCODEcCRE,Ensembl104,FANTOM5,dbSUPER	NG_056246.1	Homo_sapiens
NC_000004.12	76301409	76301554	RefSeqFE_enhancer_GeneID:111591506	gene-overlapping,intronic	lncRNA_GeneID:105377286_LOC105377286,protein_coding_GeneID:100631383_FAM47E-STBD1	ENCODEcCRE,FANTOM5	NG_056097.1	Homo_sapiens
NC_000004.12	76301476	76301487	RefSeqFE_transcriptional_cis_regulatory_region_GeneID:111591506	gene-overlapping,intronic	lncRNA_GeneID:105377286_LOC105377286,protein_coding_GeneID:100631383_FAM47E-STBD1	ENCODEcCRE,FANTOM5	NG_056097.1	Homo_sapiens
NC_000004.12	76781935	76782230	RefSeqFE_enhancer_GeneID:112997534	UTR-overlapping,exon-overlapping,gene-overlapping	lncRNA_GeneID:105377289_SHROOM3-AS1[RSG_gene],protein_coding_GeneID:57619_SHROOM3[RSG_gene]	ENCODEcCRE,dbSUPER	NG_061527.1	Homo_sapiens
NC_000004.12	78691566	78691673	RefSeqFE_transcriptional_cis_regulatory_region_GeneID:116158497	intergenic_gene_5prime-distal	.	ENCODEcCRE,Ensembl104,dbSUPER	NG_066639.1	Homo_sapiens
NC_000004.12	78691838	78692517	RefSeqFE_transcriptional_cis_regulatory_region_GeneID:116158498	intergenic_gene_5prime-distal	.	ENCODEcCRE,Ensembl104,FANTOM5,dbSUPER	NG_066640.1	Homo_sapiens
NC_000004.12	78721022	78721507	RefSeqFE_transcriptional_cis_regulatory_region_GeneID:116158499	gene-overlapping,intronic	lncRNA_GeneID:101928893_LOC101928893	ENCODEcCRE,FANTOM5,dbSUPER	NG_066641.1	Homo_sapiens
NC_000004.12	78732499	78733133	RefSeqFE_transcriptional_cis_regulatory_region_GeneID:116158500	gene-overlapping,intronic	lncRNA_GeneID:101928893_LOC101928893	ENCODEcCRE,Ensembl104,dbSUPER	NG_066642.1	Homo_sapiens
NC_000004.12	78862454	78862749	RefSeqFE_enhancer_GeneID:112997535	gene-overlapping,intronic	protein_coding_GeneID:55589_BMP2K[ClinVar_submission_gene,RSG_gene]	ENCODEcCRE,Ensembl104,dbSUPER	NG_061528.1	Homo_sapiens
NC_000004.12	80127464	80127602	RefSeqFE_transcriptional_cis_regulatory_region_GeneID:116158501	intergenic_gene_5prime-distal	.	ENCODEcCRE,FANTOM5,dbSUPER	NG_066643.1	Homo_sapiens
NC_000004.12	80143298	80143719	RefSeqFE_transcriptional_cis_regulatory_region_GeneID:116158502	intergenic_gene_5prime-distal	.	ENCODEcCRE,Ensembl104,dbSUPER	NG_066644.1	Homo_sapiens
NC_000004.12	80179525	80180174	RefSeqFE_transcriptional_cis_regulatory_region_GeneID:116158503	intergenic_gene_5prime-distal	.	ENCODEcCRE,Ensembl104,dbSUPER	NG_066645.1	Homo_sapiens
NC_000004.12	82531895	82532190	RefSeqFE_enhancer_GeneID:112997537	gene-overlapping,intronic	protein_coding_GeneID:441027_TMEM150C	ENCODEcCRE,Ensembl104	NG_061530.1	Homo_sapiens
NC_000004.12	83034895	83035190	RefSeqFE_enhancer_GeneID:112997538	intergenic_gene_5prime-proximal	.	ENCODEcCRE,Ensembl104	NG_061531.1	Homo_sapiens
NC_000004.12	83139675	83139970	RefSeqFE_enhancer_GeneID:112997539	intergenic_gene_5prime-distal	.	ENCODEcCRE,Ensembl104,dbSUPER	NG_061532.1	Homo_sapiens
NC_000004.12	83284635	83284930	RefSeqFE_enhancer_GeneID:112997540	CDS-overlapping,exon-overlapping,gene-overlapping	protein_coding_GeneID:27235_COQ2[ClinVar_submission_gene,RSG_gene]	ENCODEcCRE,Ensembl104,dbSUPER	NG_061533.1	Homo_sapiens
NC_000004.12	83323135	83323430	RefSeqFE_enhancer_GeneID:112997541	gene-overlapping,intronic	protein_coding_GeneID:10855_HPSE[RSG_gene]	.	NG_061534.1	Homo_sapiens
NC_000004.12	83455815	83456110	RefSeqFE_enhancer_GeneID:112997542	CDS-overlapping,exon-overlapping,gene-overlapping	protein_coding_GeneID:113510_HELQ,protein_coding_GeneID:51023_MRPS18C	ENCODEcCRE,Ensembl104	NG_061535.1	Homo_sapiens
NC_000004.12	83548495	83548790	RefSeqFE_enhancer_GeneID:112997543	gene-overlapping,intronic	protein_coding_GeneID:84803_GPAT3	ENCODEcCRE,Ensembl104,dbSUPER	NG_061536.1	Homo_sapiens
NC_000004.12	83618475	83618770	RefSeqFE_enhancer_GeneID:112997544	intergenic_gene_5prime-distal	.	ENCODEcCRE,Ensembl104	NG_061537.1	Homo_sapiens
NC_000004.12	83629891	83630615	RefSeqFE_transcriptional_cis_regulatory_region_GeneID:112997545	intergenic_gene_5prime-distal	.	ENCODEcCRE	NG_061538.2	Homo_sapiens
NC_000004.12	83630215	83630510	RefSeqFE_enhancer_GeneID:112997545	intergenic_gene_5prime-distal	.	ENCODEcCRE	NG_061538.2	Homo_sapiens
NC_000004.12	83778857	83780112	RefSeqFE_enhancer_GeneID:110120752	intergenic_gene_5prime-distal	.	ENCODEcCRE,Ensembl104,VISTA	NG_053377.1	Homo_sapiens
NC_000004.12	84253096	84253458	RefSeqFE_enhancer_GeneID:107988048	gene-overlapping,intronic	lncRNA_GeneID:101928978_LOC101928978	.	NG_050809.1	Homo_sapiens
NC_000004.12	84324437	84325402	RefSeqFE_enhancer_GeneID:110120743	intergenic_gene_5prime-distal	.	ENCODEcCRE,Ensembl104,VISTA	NG_053368.1	Homo_sapiens
NC_000004.12	87317576	87317871	RefSeqFE_enhancer_GeneID:112997546	gene-overlapping,intronic	protein_coding_GeneID:345275_HSD17B13	ENCODEcCRE,Ensembl104	NG_061539.1	Homo_sapiens
NC_000004.12	87794551	87799611	RefSeqFE_promoter_GeneID:110351180	intergenic_gene_5prime-proximal	.	ENCODEcCRE	NG_054764.1	Homo_sapiens
NC_000004.12	87795080	87798591	RefSeqFE_mobile_genetic_element_GeneID:110351180	intergenic_gene_5prime-proximal	.	.	NG_054764.1	Homo_sapiens
NC_000004.12	87795080	87798624	RefSeqFE_silencer_GeneID:110351180	intergenic_gene_5prime-proximal	.	.	NG_054764.1	Homo_sapiens
NC_000004.12	87798623	87799611	RefSeqFE_promoter_GeneID:110351180	intergenic_gene_5prime-proximal	.	ENCODEcCRE	NG_054764.1	Homo_sapiens
NC_000004.12	87798742	87798766	RefSeqFE_protein_binding_site_Jun_Fos_FOS_like_2_JunD_proto-oncogenes_AP-1_transcription_factor_subunits_GeneID:110351180	intergenic_gene_5prime-proximal	.	.	NG_054764.1	Homo_sapiens
NC_000004.12	87798742	87798766	RefSeqFE_protein_binding_site_cAMP_responsive_element_binding_protein_1_GeneID:110351180	intergenic_gene_5prime-proximal	.	.	NG_054764.1	Homo_sapiens
NC_000004.12	87798871	87798894	RefSeqFE_protein_binding_site_SMAD_family_member_1_GeneID:110351180	intergenic_gene_5prime-proximal	.	.	NG_054764.1	Homo_sapiens
NC_000004.12	87798871	87798894	RefSeqFE_protein_binding_site_cAMP_responsive_element_binding_protein_1_GeneID:110351180	intergenic_gene_5prime-proximal	.	.	NG_054764.1	Homo_sapiens
NC_000004.12	87799141	87799151	RefSeqFE_transcriptional_cis_regulatory_region_GeneID:110351180	intergenic_gene_5prime-proximal	.	.	NG_054764.1	Homo_sapiens
NC_000004.12	87799204	87799556	RefSeqFE_conserved_region_GeneID:110351180	intergenic_gene_5prime-proximal	.	ENCODEcCRE	NG_054764.1	Homo_sapiens
NC_000004.12	87799228	87799702	RefSeqFE_promoter_GeneID:110351180	UTR-overlapping,exon-overlapping,gene-overlapping	protein_coding_GeneID:3381_IBSP	ENCODEcCRE	NG_054764.1	Homo_sapiens
NC_000004.12	87799352	87799359	RefSeqFE_transcriptional_cis_regulatory_region_GeneID:110351180	intergenic_gene_5prime-proximal	.	ENCODEcCRE	NG_054764.1	Homo_sapiens
NC_000004.12	87799452	87799472	RefSeqFE_protein_binding_site_runt_related_transcription_factor_2_GeneID:110351180	intergenic_gene_5prime-proximal	.	ENCODEcCRE	NG_054764.1	Homo_sapiens
NC_000004.12	87799467	87799489	RefSeqFE_protein_binding_site_JunD_FOS_like_2_proto-oncogenes_AP-1_transcription_factor_subunits_GeneID:110351180	intergenic_gene_5prime-proximal	.	ENCODEcCRE	NG_054764.1	Homo_sapiens
NC_000004.12	87799467	87799489	RefSeqFE_protein_binding_site_cAMP_responsive_element_binding_protein_1_GeneID:110351180	intergenic_gene_5prime-proximal	.	ENCODEcCRE	NG_054764.1	Homo_sapiens
NC_000004.12	87799497	87799502	RefSeqFE_CAAT_signal_GeneID:110351180	intergenic_gene_5prime-proximal	.	ENCODEcCRE	NG_054764.1	Homo_sapiens
NC_000004.12	87799523	87799529	RefSeqFE_TATA_box_GeneID:110351180	intergenic_gene_5prime-proximal	.	ENCODEcCRE	NG_054764.1	Homo_sapiens
NC_000004.12	87799649	87799673	RefSeqFE_protein_binding_site_YY1_transcription_factor_GeneID:110351180	gene-overlapping,intronic	protein_coding_GeneID:3381_IBSP	ENCODEcCRE	NG_054764.1	Homo_sapiens
NC_000004.12	87973467	87975710	RefSeqFE_promoter_GeneID:110283621	intergenic_gene_5prime-proximal	.	ENCODEcCRE,Ensembl104	NG_054758.1	Homo_sapiens
NC_000004.12	87974709	87975797	RefSeqFE_promoter_GeneID:110283621	intergenic_gene_5prime-proximal	.	ENCODEcCRE,Ensembl104	NG_054758.1	Homo_sapiens
NC_000004.12	87974719	87974729	RefSeqFE_transcriptional_cis_regulatory_region_GeneID:110283621	intergenic_gene_5prime-proximal	.	.	NG_054758.1	Homo_sapiens
NC_000004.12	87974944	87974953	RefSeqFE_transcriptional_cis_regulatory_region_GeneID:110283621	intergenic_gene_5prime-proximal	.	ENCODEcCRE,Ensembl104	NG_054758.1	Homo_sapiens
NC_000004.12	87974971	87974992	RefSeqFE_enhancer_GeneID:110283621	intergenic_gene_5prime-proximal	.	ENCODEcCRE,Ensembl104	NG_054758.1	Homo_sapiens
NC_000004.12	87975019	87975028	RefSeqFE_transcriptional_cis_regulatory_region_GeneID:110283621	intergenic_gene_5prime-proximal	.	ENCODEcCRE,Ensembl104	NG_054758.1	Homo_sapiens
NC_000004.12	87975251	87975281	RefSeqFE_protein_binding_site_MYB_proto-oncogene_transcription_factor_GeneID:110283621	intergenic_gene_5prime-proximal	.	ENCODEcCRE,Ensembl104	NG_054758.1	Homo_sapiens
NC_000004.12	87975465	87975481	RefSeqFE_transcriptional_cis_regulatory_region_GeneID:110283621	intergenic_gene_5prime-proximal	.	ENCODEcCRE,Ensembl104	NG_054758.1	Homo_sapiens
NC_000004.12	87975539	87975573	RefSeqFE_protein_binding_site_runt_related_transcription_factor_2_GeneID:110283621	intergenic_gene_5prime-proximal	.	ENCODEcCRE,Ensembl104	NG_054758.1	Homo_sapiens
NC_000004.12	87975544	87975568	RefSeqFE_protein_binding_site_sex_determining_region_Y_GeneID:110283621	intergenic_gene_5prime-proximal	.	ENCODEcCRE,Ensembl104	NG_054758.1	Homo_sapiens
NC_000004.12	87975563	87975583	RefSeqFE_protein_binding_site_CCAAT/enhancer_binding_protein_alpha_GeneID:110283621	intergenic_gene_5prime-proximal	.	ENCODEcCRE,Ensembl104	NG_054758.1	Homo_sapiens
NC_000004.12	87975563	87975583	RefSeqFE_protein_binding_site_runt_related_transcription_factor_1_GeneID:110283621	intergenic_gene_5prime-proximal	.	ENCODEcCRE,Ensembl104	NG_054758.1	Homo_sapiens
NC_000004.12	87975580	87975606	RefSeqFE_protein_binding_site_ERG_ETS_transcription_factor_GeneID:110283621	intergenic_gene_5prime-proximal	.	ENCODEcCRE,Ensembl104	NG_054758.1	Homo_sapiens
NC_000004.12	87975586	87975800	RefSeqFE_promoter_GeneID:110283621	UTR-overlapping,exon-overlapping,gene-overlapping	protein_coding_GeneID:6696_SPP1[RSG_gene]	ENCODEcCRE,Ensembl104	NG_054758.1	Homo_sapiens
NC_000004.12	87975602	87975630	RefSeqFE_protein_binding_site_Sp1_transcription_factor_GeneID:110283621	intergenic_gene_5prime-proximal	.	ENCODEcCRE,Ensembl104	NG_054758.1	Homo_sapiens
NC_000004.12	87975614	87975660	RefSeqFE_protein_binding_site_MYC_proto-oncogene_bHLH_transcription_factor_GeneID:110283621	intergenic_gene_5prime-proximal	.	ENCODEcCRE,Ensembl104	NG_054758.1	Homo_sapiens
NC_000004.12	87975616	87975687	RefSeqFE_enhancer_GeneID:110283621	intergenic_gene_5prime-proximal	.	ENCODEcCRE,Ensembl104	NG_054758.1	Homo_sapiens
NC_000004.12	87975625	87975646	RefSeqFE_protein_binding_site_Jun_and_Fos_proto-oncogenes_AP-1_transcription_factor_subunits_GeneID:110283621	intergenic_gene_5prime-proximal	.	ENCODEcCRE,Ensembl104	NG_054758.1	Homo_sapiens
NC_000004.12	87975631	87975657	RefSeqFE_protein_binding_site_Sp1/Sp3_transcription_factor_GeneID:110283621	intergenic_gene_5prime-proximal	.	ENCODEcCRE,Ensembl104	NG_054758.1	Homo_sapiens
NC_000004.12	87975655	87975665	RefSeqFE_transcriptional_cis_regulatory_region_GeneID:110283621	intergenic_gene_5prime-proximal	.	ENCODEcCRE,Ensembl104	NG_054758.1	Homo_sapiens
NC_000004.12	87975660	87975693	RefSeqFE_protein_binding_site_POU_class_2_homeobox_1_and_2_GeneID:110283621	intergenic_gene_5prime-proximal	.	ENCODEcCRE,Ensembl104	NG_054758.1	Homo_sapiens
NC_000004.12	87975699	87975709	RefSeqFE_transcriptional_cis_regulatory_region_GeneID:110283621	intergenic_gene_5prime-proximal	.	ENCODEcCRE,Ensembl104	NG_054758.1	Homo_sapiens
NC_000004.12	87975838	87975867	RefSeqFE_protein_binding_site_nuclear_factor_kappa_B_subunit_1_RELA_proto-oncogene_NF-kB_subunit_GeneID:110283621	gene-overlapping,intronic	protein_coding_GeneID:6696_SPP1[RSG_gene]	Ensembl104	NG_054758.1	Homo_sapiens
NC_000004.12	87976851	87976881	RefSeqFE_protein_binding_site_CCAAT/enhancer_binding_protein_beta_GeneID:110283621	gene-overlapping,intronic	protein_coding_GeneID:6696_SPP1[RSG_gene]	Ensembl104	NG_054758.1	Homo_sapiens
NC_000004.12	88754119	88754264	RefSeqFE_enhancer_GeneID:111365205	gene-overlapping,intronic	protein_coding_GeneID:10144_FAM13A	ENCODEcCRE,Ensembl104,dbSUPER	NG_055820.1	Homo_sapiens
NC_000004.12	88754185	88754199	RefSeqFE_transcriptional_cis_regulatory_region_GeneID:111365205	gene-overlapping,intronic	protein_coding_GeneID:10144_FAM13A	ENCODEcCRE,Ensembl104,dbSUPER	NG_055820.1	Homo_sapiens
NC_000004.12	89995881	89999902	RefSeqFE_enhancer_GeneID:110121083	intergenic_gene_5prime-distal	.	ENCODEcCRE,Ensembl104,VISTA	NG_053703.1	Homo_sapiens
NC_000004.12	94148037	94148332	RefSeqFE_enhancer_GeneID:112997547	gene-overlapping,intronic	lncRNA_GeneID:101929210_LOC101929210	ENCODEcCRE,Ensembl104	NG_061540.1	Homo_sapiens
NC_000004.12	94668293	94670308	RefSeqFE_enhancer_GeneID:110121104	intergenic_gene_5prime-distal	.	ENCODEcCRE,Ensembl104,VISTA	NG_053723.1	Homo_sapiens
NC_000004.12	98682655	98683111	RefSeqFE_transcriptional_cis_regulatory_region_GeneID:116158504	intergenic_gene_5prime-distal	.	Ensembl104	NG_066646.1	Homo_sapiens
NC_000004.12	98686845	98687272	RefSeqFE_transcriptional_cis_regulatory_region_GeneID:116158505	intergenic_gene_5prime-distal	.	Ensembl104	NG_066647.1	Homo_sapiens
NC_000004.12	99088717	99088741	RefSeqFE_protein_binding_site_Sp1_transcription_factor_GeneID:111216290	UTR-overlapping,exon-overlapping,gene-overlapping	protein_coding_GeneID:128_ADH5	ENCODEcCRE,Ensembl104	NG_055572.1	Homo_sapiens
NC_000004.12	99088732	99089986	RefSeqFE_promoter_GeneID:111216290	UTR-overlapping,exon-overlapping,gene-overlapping	lncRNA_GeneID:100507053_LOC100507053	ENCODEcCRE,Ensembl104	NG_055572.1	Homo_sapiens
NC_000004.12	99088758	99088780	RefSeqFE_protein_binding_site_Sp1_transcription_factor_GeneID:111216290	UTR-overlapping,exon-overlapping,gene-overlapping	protein_coding_GeneID:128_ADH5	ENCODEcCRE,Ensembl104	NG_055572.1	Homo_sapiens
[truncated: 7,864 more rows]

## Sheet: S3C_Mouse_AR109_feats
Supplemental Table S3C. Mouse AR 109 RefSeq Functional Element features (columns 1-4 in BED format), gene-relative locations, overlapping genes and datasets (if applicable), and associated RefSeq accessions.
Chromosome	Start	Stop	Feature name (SO_type and GeneID)	Gene-relative location	Overlapping gene information	Datasets with overlapping features	NG_ accession	Organism
NC_000067.7	9718447	9721190	RefSeqFE_enhancer_GeneID:110120427	intergenic_gene_5prime-distal	.	ENCODEcCRE,Ensembl104,VISTA	NG_054490.1	Mus_musculus
NC_000067.7	12579399	12582117	RefSeqFE_enhancer_GeneID:110120424	intergenic_gene_5prime-distal	.	ENCODEcCRE,Ensembl104,VISTA	NG_054487.1	Mus_musculus
NC_000067.7	39984769	39989632	RefSeqFE_enhancer_GeneID:109280110	gene-overlapping,intronic	protein_coding_GeneID:26921_Map4k4	ENCODEcCRE,Ensembl104,VISTA,dbSUPER	NG_054379.1	Mus_musculus
NC_000067.7	41313635	41315206	RefSeqFE_enhancer_GeneID:114827887	intergenic_gene_5prime-distal	.	ENCODEcCRE,Ensembl104,VISTA	NG_065243.1	Mus_musculus
NC_000067.7	56325488	56326702	RefSeqFE_enhancer_GeneID:109279972	intergenic_gene_5prime-distal	.	Ensembl104,VISTA	NG_054244.1	Mus_musculus
NC_000067.7	57369076	57369889	RefSeqFE_enhancer_GeneID:106707176	intergenic_gene_5prime-distal	.	ENCODEcCRE,Ensembl104	NG_044971.1	Mus_musculus
NC_000067.7	57369492	57369817	RefSeqFE_conserved_region_GeneID:106707176	intergenic_gene_5prime-distal	.	Ensembl104	NG_044971.1	Mus_musculus
NC_000067.7	57369550	57369723	RefSeqFE_mobile_genetic_element_GeneID:106707176	intergenic_gene_5prime-distal	.	Ensembl104	NG_044971.1	Mus_musculus
NC_000067.7	59373081	59374592	RefSeqFE_enhancer_GeneID:110120428	gene-overlapping,intronic	protein_coding_GeneID:271697_Cdk15	ENCODEcCRE,Ensembl104,VISTA	NG_054491.1	Mus_musculus
NC_000067.7	59380020	59381205	RefSeqFE_enhancer_GeneID:109279966	gene-overlapping,intronic	protein_coding_GeneID:271697_Cdk15	ENCODEcCRE,VISTA	NG_054238.1	Mus_musculus
NC_000067.7	61241360	61243741	RefSeqFE_enhancer_GeneID:110120429	intergenic_gene_5prime-distal	.	ENCODEcCRE,VISTA	NG_054492.1	Mus_musculus
NC_000067.7	64032452	64035731	RefSeqFE_enhancer_GeneID:110120373	intergenic_gene_5prime-distal	.	ENCODEcCRE,VISTA	NG_054436.1	Mus_musculus
NC_000067.7	67834087	67835623	RefSeqFE_enhancer_GeneID:110120367	gene-overlapping,intronic	lncRNA_GeneID:105243951_Gm15669	Ensembl104,VISTA	NG_054430.1	Mus_musculus
NC_000067.7	74149394	74151822	RefSeqFE_enhancer_GeneID:114827884	gene-overlapping,intronic	protein_coding_GeneID:21961_Tns1	ENCODEcCRE,FANTOM5,VISTA	NG_065240.1	Mus_musculus
NC_000067.7	74854222	74857466	RefSeqFE_enhancer_GeneID:110120417	UTR-overlapping,exon-overlapping,gene-overlapping	lncRNA_GeneID:102634772_Gm32275	ENCODEcCRE,Ensembl104,VISTA,dbSUPER	NG_054480.1	Mus_musculus
NC_000067.7	75264930	75267816	RefSeqFE_enhancer_GeneID:109280123	intergenic_gene_5prime-distal	.	ENCODEcCRE,Ensembl104,FANTOM5,VISTA	NG_054392.1	Mus_musculus
NC_000067.7	75316101	75316513	RefSeqFE_conserved_region_GeneID:107075095	intergenic_gene_5prime-distal	.	ENCODEcCRE	NG_046373.1	Mus_musculus
NC_000067.7	75318508	75318635	RefSeqFE_conserved_region_GeneID:107075095	intergenic_gene_5prime-distal	.	.	NG_046373.1	Mus_musculus
NC_000067.7	75319673	75319732	RefSeqFE_conserved_region_GeneID:107075095	intergenic_gene_5prime-distal	.	ENCODEcCRE,Ensembl104	NG_046373.1	Mus_musculus
NC_000067.7	75319759	75319820	RefSeqFE_conserved_region_GeneID:107075095	intergenic_gene_5prime-distal	.	ENCODEcCRE,Ensembl104	NG_046373.1	Mus_musculus
NC_000067.7	75320227	75320279	RefSeqFE_conserved_region_GeneID:107075095	intergenic_gene_5prime-distal	.	.	NG_046373.1	Mus_musculus
NC_000067.7	75320974	75321084	RefSeqFE_conserved_region_GeneID:107075095	intergenic_gene_5prime-distal	.	ENCODEcCRE	NG_046373.1	Mus_musculus
NC_000067.7	75321474	75321515	RefSeqFE_conserved_region_GeneID:107075095	intergenic_gene_5prime-distal	.	ENCODEcCRE,FANTOM5	NG_046373.1	Mus_musculus
NC_000067.7	75321856	75321888	RefSeqFE_conserved_region_GeneID:107075095	intergenic_gene_5prime-distal	.	ENCODEcCRE,Ensembl104	NG_046373.1	Mus_musculus
NC_000067.7	75324061	75324250	RefSeqFE_conserved_region_GeneID:107075095	intergenic_gene_5prime-distal	.	ENCODEcCRE,dbSUPER	NG_046373.1	Mus_musculus
NC_000067.7	75325697	75325740	RefSeqFE_conserved_region_GeneID:107075095	intergenic_gene_5prime-distal	.	dbSUPER	NG_046373.1	Mus_musculus
NC_000067.7	75325969	75326028	RefSeqFE_conserved_region_GeneID:107075095	intergenic_gene_5prime-distal	.	ENCODEcCRE,dbSUPER	NG_046373.1	Mus_musculus
NC_000067.7	75326054	75326104	RefSeqFE_conserved_region_GeneID:107075095	intergenic_gene_5prime-distal	.	ENCODEcCRE,dbSUPER	NG_046373.1	Mus_musculus
NC_000067.7	75332935	75332963	RefSeqFE_protein_binding_site_POU_class_homeobox_family_member(s)_GeneID:107075095	intergenic_gene_5prime-distal	.	dbSUPER	NG_046373.1	Mus_musculus
NC_000067.7	75332938	75334462	RefSeqFE_enhancer_GeneID:107075095	intergenic_gene_5prime-distal	.	ENCODEcCRE,dbSUPER	NG_046373.1	Mus_musculus
NC_000067.7	75332938	75337047	RefSeqFE_transcriptional_cis_regulatory_region_GeneID:107075095	intergenic_gene_5prime-proximal	.	ENCODEcCRE,Ensembl104,dbSUPER	NG_046373.1	Mus_musculus
NC_000067.7	75332938	75337584	RefSeqFE_transcriptional_cis_regulatory_region_GeneID:107075095	CDS-overlapping,exon-overlapping,gene-overlapping	protein_coding_GeneID:13346_Des	ENCODEcCRE,Ensembl104,dbSUPER	NG_046373.1	Mus_musculus
NC_000067.7	75333248	75333276	RefSeqFE_protein_binding_site_POU_class_homeobox_family_member(s)_GeneID:107075095	intergenic_gene_5prime-distal	.	dbSUPER	NG_046373.1	Mus_musculus
NC_000067.7	75333248	75333276	RefSeqFE_protein_binding_site_serum_response_factor_GeneID:107075095	intergenic_gene_5prime-distal	.	dbSUPER	NG_046373.1	Mus_musculus
NC_000067.7	75335998	75336398	RefSeqFE_enhancer_GeneID:107075095	intergenic_gene_5prime-proximal	.	ENCODEcCRE,dbSUPER	NG_046373.1	Mus_musculus
NC_000067.7	75335999	75337168	RefSeqFE_transcriptional_cis_regulatory_region_GeneID:107075095	UTR-overlapping,exon-overlapping,gene-overlapping	protein_coding_GeneID:13346_Des	ENCODEcCRE,Ensembl104,dbSUPER	NG_046373.1	Mus_musculus
NC_000067.7	75336103	75336128	RefSeqFE_protein_binding_site_myocyte_enhancer_factor_2_GeneID:107075095	intergenic_gene_5prime-proximal	.	ENCODEcCRE,dbSUPER	NG_046373.1	Mus_musculus
NC_000067.7	75336138	75336154	RefSeqFE_protein_binding_site_myogenic_differentiation_1_GeneID:107075095	intergenic_gene_5prime-proximal	.	ENCODEcCRE,dbSUPER	NG_046373.1	Mus_musculus
NC_000067.7	75336138	75336154	RefSeqFE_protein_binding_site_myogenin_(myogenic_factor_4)_GeneID:107075095	intergenic_gene_5prime-proximal	.	ENCODEcCRE,dbSUPER	NG_046373.1	Mus_musculus
NC_000067.7	75336397	75336443	RefSeqFE_silencer_GeneID:107075095	intergenic_gene_5prime-proximal	.	Ensembl104,dbSUPER	NG_046373.1	Mus_musculus
NC_000067.7	75336442	75336609	RefSeqFE_transcriptional_cis_regulatory_region_GeneID:107075095	intergenic_gene_5prime-proximal	.	Ensembl104,dbSUPER	NG_046373.1	Mus_musculus
NC_000067.7	75336609	75336897	RefSeqFE_silencer_GeneID:107075095	intergenic_gene_5prime-proximal	.	ENCODEcCRE,Ensembl104,dbSUPER	NG_046373.1	Mus_musculus
NC_000067.7	75336891	75336911	RefSeqFE_protein_binding_site_myogenic_differentiation_1_GeneID:107075095	intergenic_gene_5prime-proximal	.	ENCODEcCRE,Ensembl104,dbSUPER	NG_046373.1	Mus_musculus
NC_000067.7	75336891	75336911	RefSeqFE_protein_binding_site_myogenin_(myogenic_factor_4)_GeneID:107075095	intergenic_gene_5prime-proximal	.	ENCODEcCRE,Ensembl104,dbSUPER	NG_046373.1	Mus_musculus
NC_000067.7	75336897	75336978	RefSeqFE_promoter_GeneID:107075095	UTR-overlapping,exon-overlapping,gene-overlapping	protein_coding_GeneID:13346_Des	ENCODEcCRE,Ensembl104,dbSUPER	NG_046373.1	Mus_musculus
NC_000067.7	75336942	75336948	RefSeqFE_TATA_box_GeneID:107075095	UTR-overlapping,exon-overlapping,gene-overlapping	protein_coding_GeneID:13346_Des	ENCODEcCRE,Ensembl104,dbSUPER	NG_046373.1	Mus_musculus
NC_000067.7	75637396	75639898	RefSeqFE_enhancer_GeneID:110120420	intergenic_gene_5prime-distal	.	ENCODEcCRE,VISTA	NG_054483.1	Mus_musculus
NC_000067.7	75761004	75764082	RefSeqFE_enhancer_GeneID:110120418	intergenic_gene_5prime-distal	.	ENCODEcCRE,Ensembl104,VISTA	NG_054481.1	Mus_musculus
NC_000067.7	75777534	75781974	RefSeqFE_enhancer_GeneID:110120419	intergenic_gene_5prime-distal	.	Ensembl104,VISTA	NG_054482.1	Mus_musculus
NC_000067.7	75859313	75863124	RefSeqFE_enhancer_GeneID:110120421	intergenic_gene_5prime-distal	.	Ensembl104,VISTA	NG_054484.1	Mus_musculus
NC_000067.7	77498536	77499012	RefSeqFE_enhancer_GeneID:109279844	UTR-overlapping,exon-overlapping,gene-overlapping	lncRNA_GeneID:102635461_Gm32793	ENCODEcCRE	NG_052557.1	Mus_musculus
NC_000067.7	77498614	77498623	RefSeqFE_protein_binding_site_early_growth_response_2_GeneID:109279844	intergenic_gene_5prime-distal	.	ENCODEcCRE	NG_052557.1	Mus_musculus
NC_000067.7	77498735	77498744	RefSeqFE_protein_binding_site_early_growth_response_2_GeneID:109279844	intergenic_gene_5prime-distal	.	ENCODEcCRE	NG_052557.1	Mus_musculus
NC_000067.7	77498792	77498801	RefSeqFE_protein_binding_site_early_growth_response_2_GeneID:109279844	intergenic_gene_5prime-distal	.	.	NG_052557.1	Mus_musculus
NC_000067.7	77498802	77498815	RefSeqFE_protein_binding_site_early_growth_response_2_GeneID:109279844	intergenic_gene_5prime-distal	.	.	NG_052557.1	Mus_musculus
NC_000067.7	77498821	77498830	RefSeqFE_protein_binding_site_early_growth_response_2_GeneID:109279844	UTR-overlapping,exon-overlapping,gene-overlapping	lncRNA_GeneID:102635461_Gm32793	.	NG_052557.1	Mus_musculus
NC_000067.7	77498868	77498877	RefSeqFE_protein_binding_site_early_growth_response_2_GeneID:109279844	UTR-overlapping,exon-overlapping,gene-overlapping	lncRNA_GeneID:102635461_Gm32793	.	NG_052557.1	Mus_musculus
NC_000067.7	77498880	77498891	RefSeqFE_protein_binding_site_early_growth_response_2_GeneID:109279844	UTR-overlapping,exon-overlapping,gene-overlapping	lncRNA_GeneID:102635461_Gm32793	.	NG_052557.1	Mus_musculus
NC_000067.7	77498939	77498948	RefSeqFE_protein_binding_site_early_growth_response_2_GeneID:109279844	UTR-overlapping,exon-overlapping,gene-overlapping	lncRNA_GeneID:102635461_Gm32793	ENCODEcCRE	NG_052557.1	Mus_musculus
NC_000067.7	77501709	77502336	RefSeqFE_enhancer_GeneID:109279845	gene-overlapping,intronic	lncRNA_GeneID:102635461_Gm32793	.	NG_052558.1	Mus_musculus
NC_000067.7	77501820	77501840	RefSeqFE_enhancer_GeneID:109279845	gene-overlapping,intronic	lncRNA_GeneID:102635461_Gm32793	.	NG_052558.1	Mus_musculus
NC_000067.7	77501853	77501871	RefSeqFE_enhancer_GeneID:109279845	gene-overlapping,intronic	lncRNA_GeneID:102635461_Gm32793	.	NG_052558.1	Mus_musculus
NC_000067.7	77501853	77501871	RefSeqFE_protein_binding_site_mesoderm_posterior_bHLH_transcription_factor_2_transcription_factor_3_GeneID:109279845	gene-overlapping,intronic	lncRNA_GeneID:102635461_Gm32793	.	NG_052558.1	Mus_musculus
NC_000067.7	77501959	77501979	RefSeqFE_enhancer_GeneID:109279845	gene-overlapping,intronic	lncRNA_GeneID:102635461_Gm32793	.	NG_052558.1	Mus_musculus
NC_000067.7	78036039	78038144	RefSeqFE_enhancer_GeneID:110120423	intergenic_gene_5prime-distal	.	ENCODEcCRE,VISTA	NG_054486.1	Mus_musculus
NC_000067.7	78144071	78145031	RefSeqFE_enhancer_GeneID:107980444	gene-overlapping,intronic	protein_coding_GeneID:18505_Pax3	ENCODEcCRE	NG_050754.1	Mus_musculus
NC_000067.7	78173336	78175327	RefSeqFE_promoter_GeneID:107980439	UTR-overlapping,exon-overlapping,gene-overlapping	protein_coding_GeneID:18505_Pax3	ENCODEcCRE,Ensembl104	NG_050739.1	Mus_musculus
NC_000067.7	78173766	78173781	RefSeqFE_TATA_box_GeneID:107980439	UTR-overlapping,exon-overlapping,gene-overlapping	protein_coding_GeneID:18505_Pax3	ENCODEcCRE,Ensembl104	NG_050739.1	Mus_musculus
NC_000067.7	78174491	78174724	RefSeqFE_transcriptional_cis_regulatory_region_GeneID:107980439	intergenic_gene_5prime-proximal	.	ENCODEcCRE,Ensembl104	NG_050739.1	Mus_musculus
NC_000067.7	78174491	78175102	RefSeqFE_enhancer_GeneID:107980439	intergenic_gene_5prime-proximal	.	ENCODEcCRE,Ensembl104	NG_050739.1	Mus_musculus
NC_000067.7	78174513	78174539	RefSeqFE_protein_binding_site_TEA_domain_transcription_factor_2_GeneID:107980439	intergenic_gene_5prime-proximal	.	ENCODEcCRE,Ensembl104	NG_050739.1	Mus_musculus
NC_000067.7	78174583	78174623	RefSeqFE_protein_binding_site_caudal_type_homeobox_1_GeneID:107980439	intergenic_gene_5prime-proximal	.	ENCODEcCRE,Ensembl104	NG_050739.1	Mus_musculus
NC_000067.7	78174587	78174607	RefSeqFE_protein_binding_site_POU_class_2_homeobox_1_GeneID:107980439	intergenic_gene_5prime-proximal	.	ENCODEcCRE,Ensembl104	NG_050739.1	Mus_musculus
NC_000067.7	78174587	78174607	RefSeqFE_protein_binding_site_POU_class_3_homeobox_2_GeneID:107980439	intergenic_gene_5prime-proximal	.	ENCODEcCRE,Ensembl104	NG_050739.1	Mus_musculus
NC_000067.7	78174587	78174607	RefSeqFE_protein_binding_site_POU_class_3_homeobox_3_GeneID:107980439	intergenic_gene_5prime-proximal	.	ENCODEcCRE,Ensembl104	NG_050739.1	Mus_musculus
NC_000067.7	78174612	78174648	RefSeqFE_protein_binding_site_forkhead_box_D3_GeneID:107980439	intergenic_gene_5prime-proximal	.	Ensembl104	NG_050739.1	Mus_musculus
NC_000067.7	78174613	78174653	RefSeqFE_protein_binding_site_caudal_type_homeobox_1_GeneID:107980439	intergenic_gene_5prime-proximal	.	ENCODEcCRE,Ensembl104	NG_050739.1	Mus_musculus
NC_000067.7	78174643	78174683	RefSeqFE_protein_binding_site_Zic_family_member_2_GeneID:107980439	intergenic_gene_5prime-proximal	.	ENCODEcCRE,Ensembl104	NG_050739.1	Mus_musculus
NC_000067.7	78174673	78174713	RefSeqFE_protein_binding_site_caudal_type_homeobox_1_GeneID:107980439	intergenic_gene_5prime-proximal	.	ENCODEcCRE,Ensembl104	NG_050739.1	Mus_musculus
NC_000067.7	78174879	78174896	RefSeqFE_protein_binding_site_Meis_homeobox_1_GeneID:107980439	intergenic_gene_5prime-proximal	.	ENCODEcCRE,Ensembl104	NG_050739.1	Mus_musculus
NC_000067.7	78174879	78174896	RefSeqFE_protein_binding_site_Meis_homeobox_2_GeneID:107980439	intergenic_gene_5prime-proximal	.	ENCODEcCRE,Ensembl104	NG_050739.1	Mus_musculus
NC_000067.7	78174879	78174896	RefSeqFE_protein_binding_site_PBX/knotted_1_homeobox_1_GeneID:107980439	intergenic_gene_5prime-proximal	.	ENCODEcCRE,Ensembl104	NG_050739.1	Mus_musculus
NC_000067.7	78174879	78174896	RefSeqFE_protein_binding_site_PBX_homeobox_GeneID:107980439	intergenic_gene_5prime-proximal	.	ENCODEcCRE,Ensembl104	NG_050739.1	Mus_musculus
NC_000067.7	78174879	78174896	RefSeqFE_protein_binding_site_homeobox_B4_GeneID:107980439	intergenic_gene_5prime-proximal	.	ENCODEcCRE,Ensembl104	NG_050739.1	Mus_musculus
NC_000067.7	78174879	78175102	RefSeqFE_transcriptional_cis_regulatory_region_GeneID:107980439	intergenic_gene_5prime-proximal	.	ENCODEcCRE,Ensembl104	NG_050739.1	Mus_musculus
NC_000067.7	78174918	78174951	RefSeqFE_protein_binding_site_forkhead_box_D3_GeneID:107980439	intergenic_gene_5prime-proximal	.	ENCODEcCRE,Ensembl104	NG_050739.1	Mus_musculus
NC_000067.7	78175042	78175061	RefSeqFE_protein_binding_site_Meis_homeobox_1_GeneID:107980439	intergenic_gene_5prime-proximal	.	ENCODEcCRE,Ensembl104	NG_050739.1	Mus_musculus
NC_000067.7	78175042	78175061	RefSeqFE_protein_binding_site_Meis_homeobox_2_GeneID:107980439	intergenic_gene_5prime-proximal	.	ENCODEcCRE,Ensembl104	NG_050739.1	Mus_musculus
NC_000067.7	78175042	78175061	RefSeqFE_protein_binding_site_PBX/knotted_1_homeobox_1_GeneID:107980439	intergenic_gene_5prime-proximal	.	ENCODEcCRE,Ensembl104	NG_050739.1	Mus_musculus
NC_000067.7	78175042	78175061	RefSeqFE_protein_binding_site_PBX_homeobox_GeneID:107980439	intergenic_gene_5prime-proximal	.	ENCODEcCRE,Ensembl104	NG_050739.1	Mus_musculus
NC_000067.7	78175087	78175107	RefSeqFE_protein_binding_site_POU_class_2_homeobox_1_GeneID:107980439	intergenic_gene_5prime-proximal	.	ENCODEcCRE,Ensembl104	NG_050739.1	Mus_musculus
NC_000067.7	78175087	78175107	RefSeqFE_protein_binding_site_POU_class_3_homeobox_2_GeneID:107980439	intergenic_gene_5prime-proximal	.	ENCODEcCRE,Ensembl104	NG_050739.1	Mus_musculus
NC_000067.7	78175087	78175107	RefSeqFE_protein_binding_site_POU_class_3_homeobox_3_GeneID:107980439	intergenic_gene_5prime-proximal	.	ENCODEcCRE,Ensembl104	NG_050739.1	Mus_musculus
NC_000067.7	78179418	78179709	RefSeqFE_conserved_region_GeneID:107980442	UTR-overlapping,exon-overlapping,gene-overlapping	lncRNA_GeneID:102635943_Gm33152	ENCODEcCRE,Ensembl104	NG_050749.1	Mus_musculus
NC_000067.7	78179418	78179709	RefSeqFE_enhancer_GeneID:107980442	UTR-overlapping,exon-overlapping,gene-overlapping	lncRNA_GeneID:102635943_Gm33152	ENCODEcCRE,Ensembl104	NG_050749.1	Mus_musculus
NC_000067.7	78179443	78180585	RefSeqFE_enhancer_GeneID:107980442	UTR-overlapping,exon-overlapping,gene-overlapping	lncRNA_GeneID:102635943_Gm33152	ENCODEcCRE,Ensembl104	NG_050749.1	Mus_musculus
NC_000067.7	86238317	86239471	RefSeqFE_transcriptional_cis_regulatory_region_GeneID:116803643	intergenic_gene_5prime-distal	.	ENCODEcCRE,FANTOM5	NG_068048.1	Mus_musculus
NC_000067.7	91890649	91893682	RefSeqFE_enhancer_GeneID:109280001	gene-overlapping,intronic	protein_coding_GeneID:208727_Hdac4	ENCODEcCRE,Ensembl104,VISTA	NG_054272.1	Mus_musculus
NC_000067.7	92472652	92474462	RefSeqFE_enhancer_GeneID:114515513	intergenic_gene_5prime-distal	.	.	NG_064613.1	Mus_musculus
NC_000067.7	92473614	92474084	RefSeqFE_transcriptional_cis_regulatory_region_GeneID:114515513	intergenic_gene_5prime-distal	.	.	NG_064613.1	Mus_musculus
NC_000067.7	92473836	92473886	RefSeqFE_protein_binding_site_LIM_homeobox_protein_2_GeneID:114515513	intergenic_gene_5prime-distal	.	.	NG_064613.1	Mus_musculus
NC_000067.7	92716823	92720644	RefSeqFE_enhancer_GeneID:110120422	intergenic_gene_5prime-distal	.	ENCODEcCRE,VISTA,dbSUPER	NG_054485.1	Mus_musculus
NC_000067.7	97466221	97470466	RefSeqFE_enhancer_GeneID:109280106	intergenic_gene_5prime-distal	.	ENCODEcCRE,VISTA	NG_054375.1	Mus_musculus
NC_000067.7	127482101	127484616	RefSeqFE_enhancer_GeneID:110120371	gene-overlapping,intronic	protein_coding_GeneID:72160_Tmem163	ENCODEcCRE,Ensembl104,VISTA	NG_054434.1	Mus_musculus
NC_000067.7	132260407	132262200	RefSeqFE_enhancer_GeneID:110120368	UTR-overlapping,exon-overlapping,gene-overlapping	protein_coding_GeneID:74137_Nuak2	ENCODEcCRE,Ensembl104,VISTA,dbSUPER	NG_054431.1	Mus_musculus
NC_000067.7	133108405	133111955	RefSeqFE_enhancer_GeneID:110120372	UTR-overlapping,exon-overlapping,gene-overlapping	protein_coding_GeneID:240753_Plekha6	ENCODEcCRE,Ensembl104,FANTOM5,VISTA,dbSUPER	NG_054435.1	Mus_musculus
NC_000067.7	133113717	133117231	RefSeqFE_enhancer_GeneID:110120426	gene-overlapping,intronic	protein_coding_GeneID:240753_Plekha6	ENCODEcCRE,VISTA,dbSUPER	NG_054489.1	Mus_musculus
NC_000067.7	133273724	133275784	RefSeqFE_enhancer_GeneID:107604629	intergenic_gene_5prime-distal	.	ENCODEcCRE,Ensembl104,FANTOM5	NG_046881.1	Mus_musculus
NC_000067.7	133273724	133278419	RefSeqFE_promoter_GeneID:107604629	intergenic_gene_5prime-proximal	.	ENCODEcCRE,Ensembl104,FANTOM5	NG_046881.1	Mus_musculus
NC_000067.7	133275540	133275761	RefSeqFE_conserved_region_GeneID:107604629	intergenic_gene_5prime-distal	.	ENCODEcCRE,Ensembl104,FANTOM5	NG_046881.1	Mus_musculus
NC_000067.7	133275540	133275784	RefSeqFE_enhancer_GeneID:107604629	intergenic_gene_5prime-distal	.	ENCODEcCRE,Ensembl104,FANTOM5	NG_046881.1	Mus_musculus
NC_000067.7	133275553	133275579	RefSeqFE_protein_binding_site_nuclear_factor_I_C_GeneID:107604629	intergenic_gene_5prime-distal	.	Ensembl104,FANTOM5	NG_046881.1	Mus_musculus
NC_000067.7	133275578	133275604	RefSeqFE_protein_binding_site_nuclear_factor_I_C_GeneID:107604629	intergenic_gene_5prime-distal	.	ENCODEcCRE,Ensembl104,FANTOM5	NG_046881.1	Mus_musculus
NC_000067.7	133275650	133275672	RefSeqFE_protein_binding_site_nuclear_factor_I_C_GeneID:107604629	intergenic_gene_5prime-distal	.	ENCODEcCRE,Ensembl104,FANTOM5	NG_046881.1	Mus_musculus
NC_000067.7	133275669	133275695	RefSeqFE_protein_binding_site_Sp1/Sp3_transcription_factors_GeneID:107604629	intergenic_gene_5prime-distal	.	ENCODEcCRE,Ensembl104,FANTOM5	NG_046881.1	Mus_musculus
NC_000067.7	133275688	133275718	RefSeqFE_protein_binding_site_activating_transcription_factor_2_GeneID:107604629	intergenic_gene_5prime-distal	.	ENCODEcCRE,Ensembl104,FANTOM5	NG_046881.1	Mus_musculus
NC_000067.7	133275688	133275718	RefSeqFE_protein_binding_site_nuclear_factor_of_kappa_light_polypeptide_gene_enhancer_in_B_cells_2_p49/p100_v-rel_reticuloendotheliosis_viral_oncogene_homolog_A_(avian)_GeneID:107604629	intergenic_gene_5prime-distal	.	ENCODEcCRE,Ensembl104,FANTOM5	NG_046881.1	Mus_musculus
NC_000067.7	133275689	133275717	RefSeqFE_protein_binding_site_nuclear_factor_I_C_GeneID:107604629	intergenic_gene_5prime-distal	.	ENCODEcCRE,Ensembl104,FANTOM5	NG_046881.1	Mus_musculus
[truncated: 2,153 more rows]
