# Supplementary material for: RefSeq Functional Elements as experimentally assayed nongenic reference standards and functional interactions in human and mouse
Source: HighWire-hosted journal article supplement (doi:10.1101/gr.275819.121), 2021-12-07
Supplement: Supplemental_Table_S4.xlsx [file Supplemental_Table_S4.xlsx]

## Sheet: AR109.20201120_target_genes
Supplemental Table S4. Human target genes represented in AR109.20201120 regulatory interactions and their occurrence in clinically relevant gene datasets.
Target gene	RefSeqGene	Locus Reference Genomic	ClinVar submissions	Clinically relevant
AAK1	No	No	No	No
ABCD1	Yes	Yes	Yes	Yes
ABO	Yes	Yes	No	Yes
ACE2	Yes	No	No	Yes
ADA	Yes	Yes	Yes	Yes
ADAMTS14	Yes	No	No	Yes
ADAMTSL4	Yes	No	Yes	Yes
ADH1A	No	No	No	No
ADH1B	Yes	No	No	Yes
ADH1C	Yes	No	No	Yes
ADH4	No	No	No	No
ADH5	No	No	Yes	Yes
ADH6	No	No	No	No
ADH7	No	No	No	No
ADIPOQ	Yes	No	Yes	Yes
ADM	No	No	No	No
AFP	Yes	No	Yes	Yes
AGAP1	Yes	No	Yes	Yes
AGO4	No	No	No	No
AK1	Yes	Yes	Yes	Yes
AKAP11	No	No	No	No
AKR1C1	No	No	No	No
AKR1C2	Yes	No	Yes	Yes
ALAS2	Yes	Yes	Yes	Yes
ALB	Yes	No	Yes	Yes
AMH	Yes	No	Yes	Yes
AMHR2	Yes	No	Yes	Yes
ANKRD10	No	No	No	No
ANKRD45	No	No	No	No
ANP32B	No	No	No	No
ANPEP	No	No	Yes	Yes
ANTXR2	Yes	No	Yes	Yes
ANXA1	No	No	No	No
APEX1	Yes	No	No	Yes
APIP	No	No	No	No
APLP2	Yes	No	No	Yes
APOB	Yes	No	Yes	Yes
APOC1	Yes	No	No	Yes
ARFGEF1	No	No	Yes	Yes
ARID5B	Yes	No	No	Yes
ARL4A	No	No	No	No
ARL4C	No	No	No	No
ASAH1	Yes	No	Yes	Yes
ASB1	No	No	No	No
ASH2L	No	No	Yes	Yes
ATF5	No	No	No	No
ATF7IP	No	No	No	No
ATF7IP2	No	No	No	No
ATG2A	No	No	No	No
ATP11B	No	No	No	No
ATP1B3	No	No	No	No
AVP	Yes	Yes	Yes	Yes
B3GALT5	No	No	No	No
BATF2	No	No	No	No
BAX	Yes	No	Yes	Yes
BBC3	Yes	No	No	Yes
BBS12	Yes	No	Yes	Yes
BCAT2	Yes	No	Yes	Yes
BEX4	Yes	No	No	Yes
BGLAP	Yes	No	Yes	Yes
BHLHE40	No	No	No	No
BLVRA	Yes	No	Yes	Yes
BMP2	Yes	No	Yes	Yes
BMP2K	Yes	No	Yes	Yes
BMP4	Yes	No	Yes	Yes
BMP7	Yes	No	Yes	Yes
BORCS5	No	No	Yes	Yes
BPGM	Yes	No	Yes	Yes
BRCA1	Yes	Yes	Yes	Yes
BRCA2	Yes	Yes	Yes	Yes
BSG	Yes	Yes	No	Yes
BST2	No	No	No	No
BTG1	Yes	Yes	No	Yes
BTG2	Yes	No	No	Yes
C11orf71	No	No	No	No
C12orf76	No	No	No	No
C1GALT1	Yes	No	No	Yes
CA1	Yes	No	Yes	Yes
CA8	Yes	No	Yes	Yes
CAB39	No	No	No	No
CALR	Yes	Yes	Yes	Yes
CAT	Yes	No	Yes	Yes
CCAR2	No	No	No	No
CCDC22	Yes	No	Yes	Yes
CCDC74A	No	No	No	No
CCDC88B	No	No	No	No
CCND1	Yes	Yes	No	Yes
CCND2	Yes	No	Yes	Yes
CCR9	Yes	No	No	Yes
CD2	Yes	No	No	Yes
CD209	Yes	No	No	Yes
CD2AP	Yes	No	Yes	Yes
CD46	Yes	Yes	Yes	Yes
CD47	No	No	No	No
CD52	No	No	No	No
CD58	No	No	No	No
CD69	No	No	No	No
CD83	Yes	No	No	Yes
CD8A	Yes	Yes	Yes	Yes
CD9	Yes	Yes	Yes	Yes
CDC42EP1	No	No	No	No
CDC42EP3	No	No	No	No
CDK6	Yes	Yes	Yes	Yes
CDKN2C	No	No	Yes	Yes
CEP162	No	No	No	No
CERS2	No	No	No	No
CFTR	Yes	Yes	Yes	Yes
CHD4	Yes	No	Yes	Yes
CHPF	No	No	No	No
CHRNA10	No	No	No	No
CHST12	Yes	No	No	Yes
CHST2	Yes	No	No	Yes
CITED2	Yes	No	Yes	Yes
CLEC11A	No	No	No	No
CLEC4G	Yes	No	No	Yes
CLEC4M	Yes	No	No	Yes
CLNS1A	No	No	No	No
CLTCL1	Yes	No	Yes	Yes
CMBL	No	No	No	No
CNKSR3	No	No	No	No
CNPY2	No	No	No	No
CNRIP1	No	No	No	No
COA1	No	No	No	No
COL15A1	No	No	Yes	Yes
COL18A1	Yes	No	Yes	Yes
COPZ1	No	No	Yes	Yes
CPEB4	No	No	No	No
CPPED1	No	No	No	No
CREBRF	No	No	No	No
CSF1R	Yes	No	Yes	Yes
CSH1	Yes	No	No	Yes
CSH2	No	No	No	No
CSHL1	No	No	No	No
CSTB	Yes	Yes	Yes	Yes
CTSB	Yes	No	Yes	Yes
CTSC	Yes	Yes	Yes	Yes
CTSL	No	No	No	No
CXCL2	No	No	No	No
CXCL3	No	No	No	No
CYB5R4	No	No	No	No
CYBRD1	No	No	No	No
CYP11A1	Yes	No	Yes	Yes
CYP11B1	Yes	No	Yes	Yes
CYP17A1	Yes	No	Yes	Yes
CYP19A1	Yes	No	Yes	Yes
CYP1A1	Yes	Yes	No	Yes
CYP1A2	Yes	Yes	No	Yes
CYP1B1	Yes	No	Yes	Yes
CYP21A2	Yes	Yes	Yes	Yes
CYP2A6	Yes	No	Yes	Yes
CYP2B6	Yes	Yes	No	Yes
CYP2C19	Yes	Yes	No	Yes
CYP2C8	Yes	No	Yes	Yes
CYP2C9	Yes	Yes	Yes	Yes
CYP2D6	Yes	Yes	No	Yes
CYP2E1	Yes	No	No	Yes
CYP3A4	Yes	No	Yes	Yes
CYP3A5	Yes	Yes	No	Yes
CYP3A7	Yes	No	No	Yes
CYP7A1	Yes	No	No	Yes
CYSTM1	No	No	No	No
CYTH1	No	No	No	No
DAPK1	Yes	No	No	Yes
DAZAP1	Yes	No	No	Yes
DBN1	No	No	No	No
DECR1	Yes	No	No	Yes
DENND5B	No	No	No	No
DES	Yes	Yes	Yes	Yes
DGCR2	Yes	No	Yes	Yes
DHPS	No	No	No	No
DHRS13	No	No	No	No
DIPK1C	No	No	No	No
DLL3	Yes	No	Yes	Yes
DMBX1	Yes	No	Yes	Yes
DMKN	No	No	No	No
DNAJB1	No	No	No	No
DNASE2	No	No	No	No
DPP4	No	No	No	No
DRAM1	No	No	No	No
DRAP1	No	No	No	No
DUSP1	No	No	No	No
DUSP23	No	No	No	No
EBP	Yes	No	Yes	Yes
ECI2	No	No	No	No
EDNRB	Yes	No	Yes	Yes
EED	Yes	No	Yes	Yes
EGFL7	No	No	No	No
EGR1	Yes	No	No	Yes
EIF5	No	No	Yes	Yes
ELF3	No	No	No	No
ELK1	Yes	No	No	Yes
ELOVL6	No	No	No	No
EMID1	No	No	Yes	Yes
EMX1	No	No	No	No
EN1	Yes	No	Yes	Yes
ENC1	No	No	No	No
ENDOD1	No	No	No	No
EP300	Yes	Yes	Yes	Yes
EPB41	Yes	No	Yes	Yes
EPHB6	No	No	No	No
EPHX2	Yes	No	Yes	Yes
EREG	No	No	No	No
ERMP1	No	No	Yes	Yes
ERVW-1	No	No	No	No
ETFA	Yes	No	Yes	Yes
EXO1	Yes	No	Yes	Yes
FAM102B	No	No	No	No
FAM110A	No	No	No	No
FAM20B	No	No	No	No
FAM83A	No	No	No	No
FAM89A	No	No	No	No
FBXO43	No	No	No	No
FCGR2A	Yes	Yes	No	Yes
FDXR	No	No	Yes	Yes
FEM1B	No	No	No	No
FEZ1	No	No	No	No
FGF1	No	No	No	No
FGF19	No	No	No	No
FGF2	Yes	Yes	No	Yes
FGF21	Yes	No	No	Yes
FGF3	Yes	Yes	Yes	Yes
FGF4	No	No	No	No
FGF8	Yes	No	Yes	Yes
FGFR3	Yes	Yes	Yes	Yes
FGFR4	Yes	No	Yes	Yes
FKBPL	No	No	No	No
FLOT2	No	No	No	No
FMNL2	No	No	Yes	Yes
FOSL1	No	No	No	No
FSCN1	Yes	No	No	Yes
FTH1	Yes	No	Yes	Yes
FTL	Yes	No	Yes	Yes
FUT1	Yes	Yes	Yes	Yes
FXN	Yes	Yes	Yes	Yes
GADD45A	No	No	No	No
GALM	No	No	Yes	Yes
GATA1	Yes	Yes	Yes	Yes
GATA2	Yes	Yes	Yes	Yes
GCAT	No	No	No	No
GCG	No	No	No	No
GDF5	Yes	No	Yes	Yes
GFI1B	Yes	Yes	Yes	Yes
GH1	Yes	No	Yes	Yes
GH2	No	No	No	No
GHR	Yes	No	Yes	Yes
GIGYF1	Yes	No	No	Yes
GIPC1	No	No	Yes	Yes
GLRX5	Yes	No	Yes	Yes
GLUL	Yes	No	Yes	Yes
GMPR	Yes	No	No	Yes
GNPDA1	No	No	No	No
GOLGA4	Yes	No	No	Yes
GOLIM4	No	No	No	No
GPAT3	No	No	No	No
GPR68	Yes	No	Yes	Yes
GSDMB	Yes	No	No	Yes
GYPC	Yes	Yes	Yes	Yes
H1-10	No	No	No	No
H1-2	No	No	No	No
H1-3	No	No	No	No
H1-4	No	No	Yes	Yes
H1-5	No	No	No	No
H19	Yes	Yes	Yes	Yes
H2AC6	No	No	No	No
H2BC11	No	No	No	No
H2BC12	No	No	No	No
H2BC5	No	No	No	No
H4C3	No	No	Yes	Yes
H4C8	No	No	No	No
HAPLN3	No	No	No	No
HARS1	Yes	Yes	Yes	Yes
HARS2	Yes	Yes	Yes	Yes
HBA1	Yes	Yes	Yes	Yes
HBA2	Yes	Yes	Yes	Yes
HBB	Yes	Yes	Yes	Yes
HBD	Yes	Yes	Yes	Yes
HBE1	Yes	No	No	Yes
HBG1	Yes	No	Yes	Yes
HBG2	Yes	No	Yes	Yes
HBQ1	Yes	No	No	Yes
HBZ	Yes	No	Yes	Yes
HDAC6	Yes	No	Yes	Yes
HDDC2	No	No	No	No
HEMGN	No	No	No	No
HHEX	No	No	No	No
HIBCH	Yes	No	Yes	Yes
HMGCS1	No	No	No	No
HNRNPA1	Yes	No	Yes	Yes
HNRNPAB	No	No	No	No
HNRNPLL	No	No	No	No
HPCAL1	No	No	No	No
HSD17B1	No	No	No	No
HSD3B1	Yes	No	No	Yes
HSD3B2	Yes	No	Yes	Yes
HSPB1	Yes	Yes	Yes	Yes
HTR1F	No	No	No	No
IBSP	No	No	No	No
ICAM2	No	No	No	No
ICAM3	No	No	No	No
ICAM5	No	No	No	No
ID1	Yes	No	No	Yes
ID2	No	No	No	No
IER3	No	No	No	No
IER5	No	No	No	No
IFITM1	No	No	No	No
IFNAR1	No	No	No	No
IFNGR2	Yes	Yes	Yes	Yes
IGF2	Yes	Yes	Yes	Yes
IGFBP4	No	No	Yes	Yes
IGSF3	Yes	No	Yes	Yes
IL2RB	No	No	Yes	Yes
IL4	Yes	No	No	Yes
IL6	Yes	No	No	Yes
IMPA2	Yes	No	No	Yes
INAFM1	No	No	No	No
INSIG1	No	No	Yes	Yes
INSL4	No	No	No	No
INTS8	Yes	No	Yes	Yes
IQGAP2	Yes	No	No	Yes
IRAK1	Yes	No	Yes	Yes
ISL1	Yes	No	No	Yes
ISYNA1	Yes	No	No	Yes
ITPRIP	No	No	No	No
IVL	Yes	No	No	Yes
JSRP1	Yes	No	No	Yes
JUNB	No	No	No	No
JUND	No	No	No	No
JUP	Yes	Yes	Yes	Yes
KAT2B	No	No	Yes	Yes
KCNN1	Yes	No	No	Yes
KCNN4	Yes	Yes	Yes	Yes
KEL	Yes	Yes	Yes	Yes
KIF2A	Yes	No	Yes	Yes
KIT	Yes	Yes	Yes	Yes
KLF1	Yes	Yes	Yes	Yes
KLF6	Yes	No	Yes	Yes
KLK2	Yes	No	No	Yes
KLK3	Yes	No	No	Yes
KLRF1	No	No	No	No
KRCC1	No	No	No	No
KRT18	Yes	No	Yes	Yes
KRT19	Yes	No	No	Yes
LAPTM5	No	No	No	No
LARP1	No	No	No	No
LBR	Yes	No	Yes	Yes
LCOR	Yes	No	No	Yes
LEP	Yes	No	Yes	Yes
LETM1	Yes	No	Yes	Yes
LETMD1	Yes	No	No	Yes
LGALS1	No	No	No	No
LGALS3	Yes	No	No	Yes
LIMK2	Yes	No	No	Yes
LIN28A	No	No	No	No
LMO2	No	No	No	No
LPCAT1	Yes	No	No	Yes
LRRC59	No	No	No	No
LSM3	No	No	Yes	Yes
LYL1	Yes	No	No	Yes
LYN	Yes	No	No	Yes
LYSMD2	No	No	No	No
MAGEB2	Yes	No	No	Yes
MAGI3	No	No	Yes	Yes
MANEAL	No	No	Yes	Yes
MANSC1	No	No	No	No
MAP1LC3B	Yes	No	No	Yes
MAP3K3	No	No	No	No
MATN1	Yes	No	No	Yes
MBD3	Yes	No	No	Yes
MBOAT2	No	No	No	No
MDK	No	No	No	No
MED13L	Yes	No	Yes	Yes
MEIS1	Yes	No	No	Yes
MEX3B	No	No	No	No
MFGE8	No	No	No	No
MGARP	No	No	No	No
MGAT3	No	No	No	No
MID1	Yes	No	Yes	Yes
MIIP	Yes	No	No	Yes
MINPP1	Yes	No	Yes	Yes
MIR9-1HG	No	No	No	No
MITF	Yes	Yes	Yes	Yes
MKNK2	Yes	No	No	Yes
MOCS2	Yes	No	Yes	Yes
MPC2	No	No	No	No
MPO	Yes	Yes	Yes	Yes
MPST	No	No	No	No
MRAP2	Yes	No	No	Yes
MRPL16	No	No	No	No
MRPL47	No	No	No	No
MRPL48	No	No	No	No
MRPL49	No	No	No	No
MRPS10	No	No	No	No
MSL2	No	No	No	No
MSLN	No	No	No	No
MYEOV	No	No	No	No
MYL4	Yes	No	Yes	Yes
MYLIP	No	No	No	No
NABP1	No	No	No	No
NADK	No	No	No	No
NAIF1	No	No	No	No
NAIP	Yes	No	No	Yes
NANOG	No	No	No	No
NAT10	Yes	No	No	Yes
NAV1	Yes	No	Yes	Yes
NBR2	No	No	No	No
NCOA1	Yes	No	No	Yes
NDUFB4	No	No	No	No
NEDD4L	Yes	No	Yes	Yes
NEK9	Yes	No	Yes	Yes
NENF	No	No	No	No
NET1	Yes	No	No	Yes
NF1	Yes	Yes	Yes	Yes
NFE2	No	No	No	No
NFKBIA	Yes	Yes	Yes	Yes
NLK	No	No	No	No
NMU	No	No	No	No
NOS1	Yes	No	No	Yes
NOS2	Yes	No	No	Yes
NOS3	Yes	No	Yes	Yes
NPW	No	No	No	No
NR0B1	Yes	Yes	Yes	Yes
NR2F2	Yes	No	Yes	Yes
NR5A1	Yes	No	Yes	Yes
NRIP1	Yes	No	Yes	Yes
NT5C2	Yes	No	Yes	Yes
NUCB1	No	No	No	No
NUP58	Yes	No	No	Yes
OPN1LW	Yes	No	Yes	Yes
OPN1MW	Yes	No	Yes	Yes
OPN1MW2	No	No	Yes	Yes
OPN1MW3	No	No	No	No
OPN1SW	Yes	No	Yes	Yes
OR2AT4	No	No	No	No
OR2B6	No	No	No	No
OSGEP	No	No	Yes	Yes
P2RY1	Yes	Yes	No	Yes
P4HB	Yes	No	Yes	Yes
PARD6B	No	No	No	No
PAX3	Yes	No	Yes	Yes
PAX4	Yes	No	Yes	Yes
PAX5	Yes	Yes	Yes	Yes
PAX6	Yes	Yes	Yes	Yes
PAX7	Yes	No	Yes	Yes
PAX8	Yes	No	Yes	Yes
PAX9	Yes	No	Yes	Yes
PCSEAT	No	No	No	No
PCTP	No	No	No	No
PDCD4	No	No	No	No
PDCL2	No	No	No	No
PDLIM1	No	No	No	No
PDZD8	No	No	No	No
PFKFB4	No	No	No	No
PFKL	Yes	No	No	Yes
PGAP3	Yes	No	Yes	Yes
PGLYRP4	No	No	No	No
PHB	Yes	No	No	Yes
PHF19	No	No	No	No
PHLDB1	No	No	No	No
PICALM	Yes	No	No	Yes
PIK3CB	No	No	Yes	Yes
PIM1	Yes	No	No	Yes
PKM	Yes	No	No	Yes
PLAAT3	No	No	No	No
PLIN2	No	No	No	No
PLIN3	Yes	No	No	Yes
PLP2	Yes	No	No	Yes
PNRC1	No	No	No	No
POMC	Yes	No	Yes	Yes
POU5F1	No	No	No	No
PPP1R14C	No	No	No	No
PPP1R35	No	No	No	No
PPP1R9B	Yes	No	No	Yes
PPTC7	No	No	No	No
PQBP1	Yes	No	Yes	Yes
PRDX2	Yes	No	No	Yes
PRELID2	No	No	No	No
PRKAA1	No	No	No	No
PRKAR2B	No	No	No	No
PRKCA	Yes	No	No	Yes
PRKCB	Yes	No	Yes	Yes
PRNP	Yes	No	Yes	Yes
PRODH	Yes	No	Yes	Yes
PRSS23	No	No	No	No
PSAP	Yes	No	Yes	Yes
PTBP1	No	No	No	No
PTGER3	Yes	No	Yes	Yes
PTGES2	Yes	No	No	Yes
PTH	Yes	No	Yes	Yes
PTN	No	No	No	No
PTPRC	Yes	Yes	Yes	Yes
PYCR2	Yes	No	Yes	Yes
RAB31	No	No	No	No
RAC3	No	No	Yes	Yes
RAD23A	No	No	No	No
RAD50	Yes	Yes	Yes	Yes
RAD54L	Yes	Yes	Yes	Yes
RALB	No	No	No	No
RBCK1	Yes	Yes	Yes	Yes
RELN	Yes	No	Yes	Yes
REN	Yes	No	Yes	Yes
REPS2	Yes	No	Yes	Yes
RET	Yes	Yes	Yes	Yes
RHAG	Yes	Yes	Yes	Yes
RHO	Yes	No	Yes	Yes
RNASE1	No	No	No	No
RNASEH2A	Yes	Yes	Yes	Yes
RNASET2	Yes	No	Yes	Yes
RNF182	No	No	No	No
RNF213	Yes	No	Yes	Yes
RNF24	No	No	No	No
RPN1	No	No	No	No
RPS6KC1	No	No	Yes	Yes
RRNAD1	No	No	No	No
RTN4	Yes	No	No	Yes
RUNX1	Yes	Yes	Yes	Yes
RUNX2	Yes	No	Yes	Yes
RUNX3	No	No	No	No
RYBP	No	No	No	No
S100A11	No	No	No	No
S100A6	No	No	No	No
SAMSN1	No	No	No	No
SARS1	No	No	Yes	Yes
SARS2	Yes	No	Yes	Yes
SAT1	Yes	No	No	Yes
SAT2	No	No	No	No
SCARB1	Yes	No	Yes	Yes
SCG3	Yes	No	No	Yes
SEMA7A	Yes	Yes	No	Yes
SENP7	No	No	No	No
SERPINH1	Yes	No	Yes	Yes
SHH	Yes	No	Yes	Yes
SHOX	Yes	Yes	Yes	Yes
SIAH2	No	No	No	No
SIRT1	Yes	No	No	Yes
SKA1	No	No	No	No
SLC10A4	No	No	No	No
SLC13A3	Yes	No	Yes	Yes
SLC23A2	Yes	No	Yes	Yes
SLC25A37	No	No	No	No
SLC25A39	No	No	No	No
SLC26A11	No	No	No	No
SLC29A1	Yes	Yes	Yes	Yes
SLC2A3	No	No	No	No
SLC39A3	No	No	No	No
SLC4A1	Yes	Yes	Yes	Yes
SLC6A4	Yes	No	Yes	Yes
SLC6A6	No	No	Yes	Yes
SLC6A8	Yes	No	Yes	Yes
SLC7A5	No	No	Yes	Yes
SMARCD2	Yes	No	Yes	Yes
SMIM10	No	No	No	No
SNX18	No	No	No	No
SOCS3	Yes	Yes	No	Yes
SOS1	Yes	Yes	Yes	Yes
SOX14	Yes	No	No	Yes
SOX18	Yes	No	Yes	Yes
SOX2	Yes	Yes	Yes	Yes
SOX3	Yes	No	Yes	Yes
SOX6	Yes	No	Yes	Yes
SOX9	Yes	No	Yes	Yes
SP6	No	No	No	No
SPATA5	Yes	No	Yes	Yes
SPCS3	No	No	No	No
SPP1	Yes	No	No	Yes
SPTA1	Yes	Yes	Yes	Yes
SRD5A3	Yes	No	Yes	Yes
SRSF7	No	No	No	No
SRY	Yes	No	Yes	Yes
SSBP2	Yes	No	No	Yes
SSBP4	No	No	No	No
ST3GAL5	Yes	No	Yes	Yes
ST6GAL1	No	No	No	No
ST7	Yes	No	Yes	Yes
STAR	Yes	No	Yes	Yes
STAT5B	Yes	Yes	Yes	Yes
STC2	No	No	No	No
STEAP1B	No	No	No	No
SYNGR1	Yes	No	No	Yes
SYNJ2	Yes	No	Yes	Yes
SYT10	No	No	No	No
TAC3	Yes	No	Yes	Yes
TBC1D17	No	No	No	No
TBX2	No	No	Yes	Yes
TBX21	Yes	No	Yes	Yes
TBX22	Yes	No	Yes	Yes
TBX3	Yes	No	Yes	Yes
TCEAL8	Yes	No	No	Yes
TERC	Yes	Yes	Yes	Yes
TERT	Yes	Yes	Yes	Yes
TEX15	Yes	No	Yes	Yes
TFRC	Yes	No	Yes	Yes
TGFBR1	Yes	No	Yes	Yes
TGIF1	Yes	No	Yes	Yes
TGM1	Yes	No	Yes	Yes
THADA	Yes	No	Yes	Yes
THEMIS2	No	No	No	No
TKT	Yes	No	Yes	Yes
TLCD4	No	No	No	No
TMA16	No	No	Yes	Yes
TMEM106A	No	No	No	No
TMEM141	No	No	No	No
TMEM183A	Yes	No	No	Yes
TMEM98	Yes	No	Yes	Yes
TMOD2	No	No	No	No
TMPRSS2	Yes	Yes	No	Yes
TMSB10	No	No	No	No
TMSB4X	No	No	No	No
TNFRSF10A	Yes	No	Yes	Yes
TNFRSF10B	Yes	No	Yes	Yes
TNIK	Yes	No	Yes	Yes
TP63	Yes	Yes	Yes	Yes
TPD52L1	Yes	No	No	Yes
TPST2	No	No	No	No
TRANK1	No	No	Yes	Yes
TRIB2	Yes	No	No	Yes
TRIM24	Yes	No	No	Yes
TRIM27	No	No	No	No
TRIM38	No	No	No	No
TRIM58	No	No	No	No
TRIR	No	No	No	No
TRMT1	Yes	No	Yes	Yes
TRPV2	No	No	Yes	Yes
TSKU	No	No	No	No
TSPAN5	Yes	No	No	Yes
TST	Yes	No	No	Yes
TTF2	No	No	No	No
TUBA1A	Yes	No	Yes	Yes
TUBB2A	Yes	No	Yes	Yes
TUBB4A	Yes	No	Yes	Yes
TYR	Yes	No	Yes	Yes
UBC	Yes	No	No	Yes
UBE2D2	No	No	No	No
UBE2F	No	No	No	No
UBE2S	No	No	No	No
USP6NL	No	No	No	No
UXT	No	No	No	No
VCL	Yes	Yes	Yes	Yes
VEPH1	No	No	No	No
VGF	No	No	No	No
VPS16	No	No	Yes	Yes
VPS45	Yes	Yes	Yes	Yes
WDR18	No	No	No	No
WDR83OS	No	No	No	No
WIPF3	No	No	No	No
WNK1	Yes	Yes	Yes	Yes
WRNIP1	No	No	No	No
WT1	Yes	Yes	Yes	Yes
WT1-AS	Yes	Yes	Yes	Yes
XPC	Yes	Yes	Yes	Yes
XPR1	Yes	No	Yes	Yes
YPEL3	No	No	No	No
ZAR1L	Yes	No	No	Yes
ZC3H8	No	No	No	No
ZDHHC19	No	No	No	No
ZEB2	Yes	No	Yes	Yes
ZFP36L2	No	No	No	No
ZKSCAN8	No	No	No	No
ZMYND8	No	No	No	No
ZNF121	No	No	No	No
ZNF165	No	No	No	No
ZNF273	No	No	No	No
ZNF431	Yes	No	No	Yes
ZNF518B	No	No	No	No
ZNF582	Yes	No	No	Yes
ZNF672	No	No	No	No
ZNF700	No	No	No	No
ZNF80	No	No	No	No
Count in dataset:	351	89	269	388
