# Supplementary material for: RefSeq Functional Elements as experimentally assayed nongenic reference standards and functional interactions in human and mouse
Source: HighWire-hosted journal article supplement (doi:10.1101/gr.275819.121), 2021-12-07
Supplement: Supplemental_Table_S5.xlsx [file Supplemental_Table_S5.xlsx]

## Sheet: S5A_dataset_stats&contents
Supplemental Table S5A. Statistics and general content information for RefSeq Functional Elements and other comparative gene regulatory datasets.
Dataset	Genome_cov1	%_cov2	Feat_count3	Min_length4	Max_length5	Av_length6	StdDev7	Feature_types	Data_derivation	Publication
Human datasets:
RefSeqFE AR109.2020110	6062944	0.185293	9862	1	141940	781.01	3187.83	Numerous types as in Supplemental Table S2A,B	Various experimental assays from the literature	This manuscript
ENCODE cCREs	253321371	7.74188	926535	150	350	273.41	67.26	CTCF-only, DNase-H3K4me3, distal_enhancer, promoter, proximal_enhancer	Epigenomic signatures, ChIP-seq, accessibility assays	The ENCODE Project Consortium et al. 2020, PMID:32728249
Ensembl Regulation 104	510358468	15.5973	622457	2	69402	874.22	1209.26	CTCF_binding_site, TF_binding_site, enhancer, open_chromatin_region, promoter, promoter_flanking_region	Epigenomic signatures, ChIP-seq, accessibility assays	Zerbino et al. 2016, PMID:26888907
FANTOM5 enhancers	18641566	0.569714	63285	2	2804	294.57	170.46	enhancer	Bidirectional balanced CAGE data, reporter assays/transgenesis for a subset	Andersson et al. 2014, PMID:24670763
VISTA enhancers	3803366	0.116237	1989	315	8062	1920.82	1126.29	enhancer	Comparative genomics, transgenic assays	Visel et al. 2007, PMID:17130149
dbSUPER enhancers	540491068	16.5182	69340	285	498572	36240.2	29216.2	super_enhancer	Epigenomic signatures, ChIP-seq	Khan and Zhang, 2016, PMID:26438538
Above non-NCBI datasets combined	943284760	28.8282	1683606	2	498572	1979.59	9284.62	As above	As above	As above
Mouse datasets:
RefSeqFE AR109	2240051	0.0821066	2271	1	32327	1124.52	1862.81	Numerous types as in Supplemental Table S2A,B	Various experimental assays from the literature	This manuscript
ENCODE cCREs	92508934	3.39081	343747	44	351	272.2	66	CTCF-only, DNase-H3K4me3, distal_enhancer, promoter, proximal_enhancer	Epigenomic signatures, ChIP-seq	The ENCODE Project Consortium et al. 2020, PMID:32728249
Ensembl Regulation 104	297987684	10.9224	364670	2	78202	858.02	1261.96	CTCF_binding_site, TF_binding_site, enhancer, open_chromatin_region, promoter, promoter_flanking_region	Epigenomic signatures, ChIP-seq	Zerbino et al. 2016, PMID:26888907
FANTOM5 enhancers	14831390	0.543628	49802	3	3339	297.81	170.87	enhancer	Bidirectional balanced CAGE data	Andersson et al. 2014, PMID:24670763
VISTA enhancers	3508026	0.128583	1291	188	11484	2790.14	1448.77	enhancer	Comparative genomics, transgenic assays	Visel et al. 2007, PMID:17130149
dbSUPER enhancers	159498046	5.84623	12103	320	202016	23301.6	18008.9	super_enhancer	Epigenomic signatures, ChIP-seq	Khan and Zhang, 2016, PMID:26438538
Above non-NCBI datasets combined	428095484	15.6914	771613	2	202016	916.15	3731.43	As above	As above	As above
1Genome coverage based on the total length (bps) of all collapsed features from the indicated dataset
2Percent genome coverage of all collapsed features from the indicated datasets relevant to all chromosomes/contigs/scaffolds on the human GRCh38.p13 or mouse GRCm39 reference assemblies
3Number of distinct features represented in the indicated dataset on the GRCh38.p13 or GRCm39 reference assemblies
4Minimum feature length in the indicated dataset
5Maximum feature length in the indicated dataset
6Average feature length in the indicated dataset
7Feature length standard deviation from the mean in the indicated dataset

## Sheet: S5B_human_overlap_stats
Supplemental Table S5B. Statistics for human AR 109.20201120 RefSeq Functional Element intersections with other gene regulatory datasets.
	Statistics WRT RefSeqFE features			Statistics WRT non-NCBI dataset features
Description	Overlap count1	Input count2	% overlap3	Overlap count4	Input count5	% overlap6	Fisher p-value7	Jaccard statistic8
ENCODE cCRE overlaps:
All RefSeqFE features vs. all ENCODE cCRE features	6249	9862	63.3644	7212	926535	0.778384	0	0.0068709
RefSeqFE regulatory class features vs. all ENCODE cCRE features	4900	6200	79.0323	6684	926535	0.721397	0	0.00643936
RefSeqFE enhancer features vs. all ENCODE cCRE features	3105	3781	82.1211	5010	926535	0.540724	0	0.00481774
RefSeqFE enhancer features vs. ENCODE cCRE enhancer features	2697	3781	71.3303	4480	809429	0.553477	0	0.00490835
Ensembl Regulation 104 overlaps:
All RefSeqFE features vs. all Ensembl features	5680	9862	57.5948	4568	622457	0.733866	0	0.00468242
RefSeqFE regulatory class features vs. all Ensembl features	4159	6200	67.0806	4061	622457	0.652415	0	0.00395659
RefSeqFE enhancer features vs. all Ensembl features	2637	3781	69.7435	3108	622457	0.499312	0	0.0029618
RefSeqFE enhancer features vs. Ensembl enhancer features	335	3781	8.86009	353	127935	0.275921	1.4742e-20	0.0029618
FANTOM5 enhancer overlaps:
All RefSeqFE features vs. all FANTOM5 enhancers	1280	9862	12.9791	974	63285	1.53907	0	0.0111189
RefSeqFE regulatory class features vs. all FANTOM5 enhancers	1066	6200	17.1935	945	63285	1.49324	0	0.0115601
RefSeqFE enhancer features vs. all FANTOM5 enhancers	710	3781	18.7781	716	63285	1.13139	0	0.00887803
VISTA enhancer overlaps:
All RefSeqFE features vs. all VISTA enhancers	1102	9862	11.1742	1033	1989	51.9356	0	0.272345
RefSeqFE regulatory class features vs. all VISTA enhancers	1079	6200	17.4032	1033	1989	51.9356	0	0.356761
RefSeqFE enhancer features vs. all VISTA enhancers (positives and negatives)	1057	3781	27.9556	1026	1989	51.5837	0	0.435238
RefSeqFE enhancer features vs. all VISTA positive enhancers	1044	3781	27.6117	1009	1022	98.728	0	0.662247
dbSUPER overlaps:
All RefSeqFE features vs. all dbSUPER super-enhancers	4199	9862	42.5776	13190	69340	19.0222	0	0.00453687
RefSeqFE regulatory class features vs. all dbSUPER super-enhancers	2992	6200	48.2581	12768	69340	18.4136	0	0.0036029
RefSeqFE enhancer features vs. all dbSUPER super-enhancers	1766	3781	46.7072	10625	69340	15.323	0	0.00255441
Overlaps with all non-NCBI datasets combined:
All RefSeqFE features vs. all combined non-NCBI dataset features	7873	9862	79.8317	26977	1683606	1.60233	1	0.00476777
RefSeqFE regulatory class features vs. all combined non-NCBI dataset features	5661	6200	91.3065	25491	1683606	1.51407	1	0.00399256
RefSeqFE enhancer features vs. all combined non-NCBI dataset features	3536	3781	93.5202	20485	1683606	1.21673	1	0.00312431
RefSeqFE enhancer features vs. combined non-NCBI dataset enhancer features	3230	3781	85.4271	17200	1071978	1.60451	1	0.00388221
RefSeqFE features lacking overlap with any of the non-NCBI datasets:
All RefSeqFE features vs. all combined non-NCBI dataset features	1989	9862	20.1683	0	1683606	0	n/a	n/a
1Number of RefSeqFE features showing overlap with features in the indicated dataset following feature uniquification, based on intersections with no restrictions or calls; for row 39 the count is based on lack of overlap
2Number of input RefSeqFE features used in the intersection with the indicated dataset
3Percent of input RefSeqFE features showing overlap with the indicated dataset (overlap count/input count X 100); results plotted in Figure 6B; for row 39 the percentage is based on lack of overlap
4Number of non-NCBI dataset features showing overlap with RefSeqFE features following feature uniquification, based on intersections with no restrictions or calls
5Number of input non-NCBI dataset features used in the intersection with RefSeqFE features
6Percent of input non-NCBI dataset features showing overlap with RefSeqFE features (overlap count/input count X 100)
7Two-tailed Fisher p-value based on feature intersections with no restrictions or calls
8Jaccard statistic based on feature intersections with no restrictions or calls

## Sheet: S5C_mouse_overlap_stats
Supplemental Table S5C. Statistics for mouse AR 109 RefSeq Functional Element intersections with other gene regulatory datasets.
	Statistics WRT RefSeqFE features			Statistics WRT non-NCBI dataset features
Description	Overlap count1	Input count2	% overlap3	Overlap count4	Input count5	% overlap6	Fisher p-value7	Jaccard statistic8
ENCODE cCRE overlaps:
All RefSeqFE features vs. all ENCODE cCRE features	1459	2271	64.2448	2464	343747	0.716806	0	0.00665758
RefSeqFE regulatory class features vs. all ENCODE cCRE features	1066	1472	72.4185	2452	343747	0.713315	0	0.00664055
RefSeqFE enhancer features vs. all ENCODE cCRE features	790	1016	77.7559	2110	343747	0.613824	0	0.00573378
RefSeqFE enhancer features vs. ENCODE cCRE enhancer features	752	1016	74.0157	2047	285016	0.718205	0	0.00675177
Ensembl Regulation 104 overlaps:
All RefSeqFE features vs. all Ensembl features	1381	2271	60.8102	915	364670	0.250912	0	0.00297211
RefSeqFE regulatory class features vs. all Ensembl features	974	1472	66.1685	906	364670	0.248444	0	0.00296598
RefSeqFE enhancer features vs. all Ensembl features	664	1016	65.3543	753	364670	0.206488	1.0981e-221	0.00247277
RefSeqFE enhancer features vs. Ensembl enhancer features	77	1016	7.57874	78	70004	0.111422	0.032833	0.00108877
FANTOM5 enhancer overlaps:
All RefSeqFE features vs. all FANTOM5 enhancers	468	2271	20.6077	438	49802	0.879483	0	0.0091816
RefSeqFE regulatory class features vs. all FANTOM5 enhancers	371	1472	25.2038	436	49802	0.875467	0	0.00917451
RefSeqFE enhancer features vs. all FANTOM5 enhancers	291	1016	28.6417	364	49802	0.730894	1.2024e-280	0.00744638
VISTA enhancer overlaps:
All RefSeqFE features vs. all VISTA enhancers	673	2271	29.6345	628	1291	48.6445	0	0.355694
RefSeqFE regulatory class features vs. all VISTA enhancers	653	1472	44.3614	628	1291	48.6445	0	0.357086
RefSeqFE enhancer features vs. all VISTA enhancers (positives and negatives)	640	1016	62.9921	627	1291	48.567	0	0.395396
RefSeqFE enhancer features vs. all VISTA positive enhancers	633	1016	62.3031	622	655	94.9618	0	0.768724
dbSUPER overlaps:
All RefSeqFE features vs. all dbSUPER super-enhancers	669	2271	29.4584	723	12103	5.97373	0	0.00581968
RefSeqFE regulatory class features vs. all dbSUPER super-enhancers	508	1472	34.5109	723	12103	5.97373	0	0.00581396
RefSeqFE enhancer features vs. all dbSUPER super-enhancers	378	1016	37.2047	685	12103	5.65975	0	0.00470024
Overlaps with all non-NCBI datasets combined:
All RefSeqFE features vs. all combined non-NCBI dataset features	1847	2271	81.3298	5168	771613	0.669766	0	0.00457651
RefSeqFE regulatory class features vs. all combined non-NCBI dataset features	1286	1472	87.3641	5145	771613	0.666785	0	0.00456861
RefSeqFE enhancer features vs. all combined non-NCBI dataset features	919	1016	90.4528	4539	771613	0.588248	0	0.00392357
RefSeqFE enhancer features vs. combined non-NCBI dataset enhancer features	850	1016	83.6614	3801	418216	0.90886	0	0.00620031
RefSeqFE features lacking overlap with any of the non-NCBI datasets:
All RefSeqFE features vs. all combined non-NCBI dataset features	424	2271	18.6702	0	771613	0	n/a	n/a
1Number of RefSeqFE features showing overlap with features in the indicated dataset following feature uniquification, based on intersections with no restrictions or calls; for row 39 the count is based on lack of overlap
2Number of input RefSeqFE features used in the intersection with the indicated dataset
3Percent of input RefSeqFE features showing overlap with the indicated dataset (overlap count/input count X 100); results plotted in Figure 6D; for row 39 the percentage is based on lack of overlap
4Number of non-NCBI dataset features showing overlap with RefSeqFE features following feature uniquification, based on intersections with no restrictions or calls
5Number of input non-NCBI dataset features used in the intersection with RefSeqFE features
6Percent of input non-NCBI dataset features showing overlap with RefSeqFE features (overlap count/input count X 100)
7Two-tailed Fisher p-value based on feature intersections with no restrictions or calls
8Jaccard statistic based on feature intersections with no restrictions or calls

## Sheet: S5D_human_overlap_output
Supplemental Table S5D. Output for human AR 109.20201120 RefSeq Functional Element intersections with other gene regulatory datasets, including feature and overlap lengths and degrees of overlap with respect to each dataset feature.
RefSeqFE chr	RefSeqFE start	RefSeqFE stop	RefSeqFE feature	Other dataset chr	Other dataset start	Other dataset stop	Other dataset feature	Overlap length	RefSeqFE feat_length	Other feat_length	RefSeqFE overlap degree	Other overlap degree
NC_000001.11	1069211	1069326	RefSeqFE_enhancer_GeneID:106783496	NC_000001.11	1066583	1080657	dbSUPER_LNCaP_SE_41944	115	115	14074	1	0.0081711
NC_000001.11	1069211	1069326	RefSeqFE_enhancer_GeneID:106783496	NC_000001.11	1069169	1069516	ENCODEcCRE_EH38E1310441_distal_enhancer	115	115	347	1	0.331412
NC_000001.11	1069211	1069326	RefSeqFE_enhancer_GeneID:106783496	NC_000001.11	1058140	1092691	dbSUPER_HCT-116_SE_34539	115	115	34551	1	0.00332841
NC_000001.11	1069211	1069326	RefSeqFE_enhancer_GeneID:106783496	NC_000001.11	1058432	1080814	dbSUPER_Pancreatic_islets_SE_65935	115	115	22382	1	0.00513806
NC_000001.11	1069211	1069326	RefSeqFE_enhancer_GeneID:106783496	NC_000001.11	1059762	1080693	dbSUPER_Colon_Crypt_2_SE_24070	115	115	20931	1	0.00549424
NC_000001.11	1069211	1069326	RefSeqFE_enhancer_GeneID:106783496	NC_000001.11	1063831	1080706	dbSUPER_VACO_9m_SE_58139	115	115	16875	1	0.00681481
NC_000001.11	1069211	1069326	RefSeqFE_enhancer_GeneID:106783496	NC_000001.11	1063863	1080513	dbSUPER_Esophagus_SE_27529	115	115	16650	1	0.00690691
NC_000001.11	1069211	1069326	RefSeqFE_enhancer_GeneID:106783496	NC_000001.11	1024742	1080725	dbSUPER_Colon_Crypt_3_SE_24817	115	115	55983	1	0.0020542
NC_000001.11	1134849	1135934	RefSeqFE_transcriptional_cis_regulatory_region_GeneID:115801415	NC_000001.11	1134034	1138376	dbSUPER_Colon_Crypt_3_SE_25166	1085	1085	4342	1	0.249885
NC_000001.11	1134849	1135934	RefSeqFE_transcriptional_cis_regulatory_region_GeneID:115801415	NC_000001.11	1134063	1138337	dbSUPER_Colon_Crypt_2_SE_24460	1085	1085	4274	1	0.253861
NC_000001.11	1134849	1135934	RefSeqFE_transcriptional_cis_regulatory_region_GeneID:115801415	NC_000001.11	1135365	1135771	FANTOM5_enhancer_chr1:1135365-1135771	406	1085	406	0.374194	1
NC_000001.11	1134849	1135934	RefSeqFE_transcriptional_cis_regulatory_region_GeneID:115801415	NC_000001.11	1135383	1135733	ENCODEcCRE_EH38E1310517_proximal_enhancer	350	1085	350	0.322581	1
NC_000001.11	1134849	1135934	RefSeqFE_transcriptional_cis_regulatory_region_GeneID:115801415	NC_000001.11	1123586	1166497	dbSUPER_Small_Intestine_SE_52392	1085	1085	42911	1	0.0252849
NC_000001.11	1134849	1135934	RefSeqFE_transcriptional_cis_regulatory_region_GeneID:115801415	NC_000001.11	1124032	1166306	dbSUPER_Fetal_Intestine_Large_SE_29232	1085	1085	42274	1	0.0256659
NC_000001.11	1134849	1135934	RefSeqFE_transcriptional_cis_regulatory_region_GeneID:115801415	NC_000001.11	1124253	1166523	dbSUPER_Fetal_Intestine_SE_28002	1085	1085	42270	1	0.0256683
NC_000001.11	1134849	1135934	RefSeqFE_transcriptional_cis_regulatory_region_GeneID:115801415	NC_000001.11	1124302	1166533	dbSUPER_VACO_400_SE_56870	1085	1085	42231	1	0.025692
NC_000001.11	1134849	1135934	RefSeqFE_transcriptional_cis_regulatory_region_GeneID:115801415	NC_000001.11	1132198	1166798	dbSUPER_LNCaP_SE_41856	1085	1085	34600	1	0.0313584
NC_000001.11	1134849	1135934	RefSeqFE_transcriptional_cis_regulatory_region_GeneID:115801415	NC_000001.11	1132806	1166516	dbSUPER_Esophagus_SE_27531	1085	1085	33710	1	0.0321863
NC_000001.11	1134849	1135934	RefSeqFE_transcriptional_cis_regulatory_region_GeneID:115801415	NC_000001.11	1135410	1159007	dbSUPER_CD19_Primary_SE_10678	524	1085	23597	0.482949	0.0222062
NC_000001.11	1287379	1288916	RefSeqFE_meiotic_recombination_region_GeneID:110599576	NC_000001.11	1287492	1287737	ENCODEcCRE_EH38E1310720_distal_enhancer	245	1537	245	0.159401	1
NC_000001.11	1287379	1288916	RefSeqFE_meiotic_recombination_region_GeneID:110599576	NC_000001.11	1287600	1287800	Ensembl104_CTCF_binding_site:ENSR00001164831	200	1537	200	0.130124	1
NC_000001.11	1287379	1288916	RefSeqFE_meiotic_recombination_region_GeneID:110599576	NC_000001.11	1287707	1287991	Ensembl104_TF_binding_site:ENSR00001164832	284	1537	284	0.184776	1
NC_000001.11	1287379	1288916	RefSeqFE_meiotic_recombination_region_GeneID:110599576	NC_000001.11	1288200	1292800	Ensembl104_CTCF_binding_site:ENSR00000249817	716	1537	4600	0.465843	0.155652
NC_000001.11	1288007	1290297	RefSeqFE_repeat_instability_region_GeneID:110599576	NC_000001.11	1288200	1292800	Ensembl104_CTCF_binding_site:ENSR00000249817	2097	2290	4600	0.915721	0.45587
NC_000001.11	1288007	1290297	RefSeqFE_repeat_instability_region_GeneID:110599576	NC_000001.11	1290080	1292400	Ensembl104_promoter_flanking_region:ENSR00000918437	217	2290	2320	0.0947598	0.0935345
NC_000001.11	1288007	1290297	RefSeqFE_repeat_instability_region_GeneID:110599576	NC_000001.11	1290198	1290501	ENCODEcCRE_EH38E1310722_CTCF-only	99	2290	303	0.0432314	0.326733
NC_000001.11	1288199	1290253	RefSeqFE_tandem_repeat_GeneID:110599576	NC_000001.11	1288200	1292800	Ensembl104_CTCF_binding_site:ENSR00000249817	2053	2054	4600	0.999513	0.446304
NC_000001.11	1288199	1290253	RefSeqFE_tandem_repeat_GeneID:110599576	NC_000001.11	1290080	1292400	Ensembl104_promoter_flanking_region:ENSR00000918437	173	2054	2320	0.0842259	0.074569
NC_000001.11	1288199	1290253	RefSeqFE_tandem_repeat_GeneID:110599576	NC_000001.11	1290198	1290501	ENCODEcCRE_EH38E1310722_CTCF-only	55	2054	303	0.026777	0.181518
NC_000001.11	1289306	1291600	RefSeqFE_meiotic_recombination_region_GeneID:110599576	NC_000001.11	1288200	1292800	Ensembl104_CTCF_binding_site:ENSR00000249817	2294	2294	4600	1	0.498696
NC_000001.11	1289306	1291600	RefSeqFE_meiotic_recombination_region_GeneID:110599576	NC_000001.11	1290080	1292400	Ensembl104_promoter_flanking_region:ENSR00000918437	1520	2294	2320	0.662598	0.655172
NC_000001.11	1289306	1291600	RefSeqFE_meiotic_recombination_region_GeneID:110599576	NC_000001.11	1290198	1290501	ENCODEcCRE_EH38E1310722_CTCF-only	303	2294	303	0.132084	1
NC_000001.11	1289306	1291600	RefSeqFE_meiotic_recombination_region_GeneID:110599576	NC_000001.11	1291218	1291535	ENCODEcCRE_EH38E1310725_distal_enhancer	317	2294	317	0.138187	1
NC_000001.11	1289306	1291600	RefSeqFE_meiotic_recombination_region_GeneID:110599576	NC_000001.11	1290394	1322532	dbSUPER_Brain_Hippocampus_Middle_SE_06507	1206	2294	32138	0.525719	0.0375257
NC_000001.11	1289306	1291600	RefSeqFE_meiotic_recombination_region_GeneID:110599576	NC_000001.11	1290824	1319782	dbSUPER_Brain_Hippocampus_Middle_150_SE_07598	776	2294	28958	0.338274	0.0267974
NC_000001.11	1290255	1290268	RefSeqFE_nucleotide_motif_GeneID:110599576	NC_000001.11	1288200	1292800	Ensembl104_CTCF_binding_site:ENSR00000249817	13	13	4600	1	0.00282609
NC_000001.11	1290255	1290268	RefSeqFE_nucleotide_motif_GeneID:110599576	NC_000001.11	1290080	1292400	Ensembl104_promoter_flanking_region:ENSR00000918437	13	13	2320	1	0.00560345
NC_000001.11	1290255	1290268	RefSeqFE_nucleotide_motif_GeneID:110599576	NC_000001.11	1290198	1290501	ENCODEcCRE_EH38E1310722_CTCF-only	13	13	303	1	0.0429043
NC_000001.11	1290849	1290862	RefSeqFE_nucleotide_motif_GeneID:110599576	NC_000001.11	1288200	1292800	Ensembl104_CTCF_binding_site:ENSR00000249817	13	13	4600	1	0.00282609
NC_000001.11	1290849	1290862	RefSeqFE_nucleotide_motif_GeneID:110599576	NC_000001.11	1290080	1292400	Ensembl104_promoter_flanking_region:ENSR00000918437	13	13	2320	1	0.00560345
NC_000001.11	1290849	1290862	RefSeqFE_nucleotide_motif_GeneID:110599576	NC_000001.11	1290394	1322532	dbSUPER_Brain_Hippocampus_Middle_SE_06507	13	13	32138	1	0.000404506
NC_000001.11	1290849	1290862	RefSeqFE_nucleotide_motif_GeneID:110599576	NC_000001.11	1290824	1319782	dbSUPER_Brain_Hippocampus_Middle_150_SE_07598	13	13	28958	1	0.000448926
NC_000001.11	1290911	1290927	RefSeqFE_nucleotide_motif_GeneID:110599576	NC_000001.11	1288200	1292800	Ensembl104_CTCF_binding_site:ENSR00000249817	16	16	4600	1	0.00347826
NC_000001.11	1290911	1290927	RefSeqFE_nucleotide_motif_GeneID:110599576	NC_000001.11	1290080	1292400	Ensembl104_promoter_flanking_region:ENSR00000918437	16	16	2320	1	0.00689655
NC_000001.11	1290911	1290927	RefSeqFE_nucleotide_motif_GeneID:110599576	NC_000001.11	1290394	1322532	dbSUPER_Brain_Hippocampus_Middle_SE_06507	16	16	32138	1	0.000497853
NC_000001.11	1290911	1290927	RefSeqFE_nucleotide_motif_GeneID:110599576	NC_000001.11	1290824	1319782	dbSUPER_Brain_Hippocampus_Middle_150_SE_07598	16	16	28958	1	0.000552524
NC_000001.11	2255789	2256084	RefSeqFE_enhancer_GeneID:112577524	NC_000001.11	2251416	2259770	dbSUPER_CD8_primary_SE_22376	295	295	8354	1	0.0353124
NC_000001.11	2255789	2256084	RefSeqFE_enhancer_GeneID:112577524	NC_000001.11	2253101	2260002	dbSUPER_CD4p_CD225int_CD127p_Tmem_SE_17042	295	295	6901	1	0.0427474
NC_000001.11	2255789	2256084	RefSeqFE_enhancer_GeneID:112577524	NC_000001.11	2253226	2259522	dbSUPER_CD3_SE_12005	295	295	6296	1	0.0468551
NC_000001.11	2255789	2256084	RefSeqFE_enhancer_GeneID:112577524	NC_000001.11	2253730	2260274	dbSUPER_CD8_Naive_8pool_SE_21979	295	295	6544	1	0.0450795
NC_000001.11	2255789	2256084	RefSeqFE_enhancer_GeneID:112577524	NC_000001.11	2253902	2257622	dbSUPER_CD8_Naive_7pool_SE_21558	295	295	3720	1	0.0793011
NC_000001.11	2255789	2256084	RefSeqFE_enhancer_GeneID:112577524	NC_000001.11	2253912	2257697	dbSUPER_CD4_Naive_Primary_8pool_SE_16427	295	295	3785	1	0.0779392
NC_000001.11	2255789	2256084	RefSeqFE_enhancer_GeneID:112577524	NC_000001.11	2253995	2257178	dbSUPER_CD8_Memory_7pool_SE_21247	295	295	3183	1	0.0926799
NC_000001.11	2255789	2256084	RefSeqFE_enhancer_GeneID:112577524	NC_000001.11	2254212	2257230	dbSUPER_CD4_Naive_Primary_7pool_SE_15942	295	295	3018	1	0.0977469
NC_000001.11	2255789	2256084	RefSeqFE_enhancer_GeneID:112577524	NC_000001.11	2254599	2258601	Ensembl104_promoter:ENSR00001164914	295	295	4002	1	0.0737131
NC_000001.11	2255789	2256084	RefSeqFE_enhancer_GeneID:112577524	NC_000001.11	2255658	2255862	ENCODEcCRE_EH38E1311701_distal_enhancer	73	295	204	0.247458	0.357843
NC_000001.11	2255789	2256084	RefSeqFE_enhancer_GeneID:112577524	NC_000001.11	2255898	2256245	ENCODEcCRE_EH38E1311702_distal_enhancer	186	295	347	0.630508	0.536023
NC_000001.11	2255789	2256084	RefSeqFE_enhancer_GeneID:112577524	NC_000001.11	2228657	2260642	dbSUPER_CD4p_CD25-_CD45ROp_Memory_SE_17845	295	295	31985	1	0.00922307
NC_000001.11	2255789	2256084	RefSeqFE_enhancer_GeneID:112577524	NC_000001.11	2228664	2316514	dbSUPER_CD4p_CD25-_CD45RAp_Naive_SE_17322	295	295	87850	1	0.003358
NC_000001.11	2255789	2256084	RefSeqFE_enhancer_GeneID:112577524	NC_000001.11	2228683	2315826	dbSUPER_CD4p_CD25-_Il17p_PMAstim_Th17_SE_19191	295	295	87143	1	0.00338524
NC_000001.11	2255789	2256084	RefSeqFE_enhancer_GeneID:112577524	NC_000001.11	2228689	2313747	dbSUPER_LNCaP_SE_41586	295	295	85058	1	0.00346822
NC_000001.11	2255789	2256084	RefSeqFE_enhancer_GeneID:112577524	NC_000001.11	2228709	2314961	dbSUPER_CD4p_CD25-_Il17-_PMAstim_Th_SE_18345	295	295	86252	1	0.00342021
NC_000001.11	2255789	2256084	RefSeqFE_enhancer_GeneID:112577524	NC_000001.11	2228711	2260494	dbSUPER_Brain_Cingulate_Gyrus_SE_05718	295	295	31783	1	0.00928169
NC_000001.11	2255789	2256084	RefSeqFE_enhancer_GeneID:112577524	NC_000001.11	2228749	2259651	dbSUPER_CD56_SE_20071	295	295	30902	1	0.00954631
NC_000001.11	2255789	2256084	RefSeqFE_enhancer_GeneID:112577524	NC_000001.11	2228812	2260894	dbSUPER_Brain_Inferior_Temporal_Lobe_SE_08491	295	295	32082	1	0.00919519
NC_000001.11	2255789	2256084	RefSeqFE_enhancer_GeneID:112577524	NC_000001.11	2228915	2323574	dbSUPER_Osteoblasts_SE_46124	295	295	94659	1	0.00311645
NC_000001.11	2255789	2256084	RefSeqFE_enhancer_GeneID:112577524	NC_000001.11	2229852	2259860	dbSUPER_Brain_Angular_Gyrus_SE_03761	295	295	30008	1	0.00983071
NC_000001.11	2255789	2256084	RefSeqFE_enhancer_GeneID:112577524	NC_000001.11	2230723	2257281	dbSUPER_Brain_Mid_Frontal_Lobe_SE_08969	295	295	26558	1	0.0111078
NC_000001.11	2255789	2256084	RefSeqFE_enhancer_GeneID:112577524	NC_000001.11	2188947	2260303	dbSUPER_Tonsil_SE_62490	295	295	71356	1	0.0041342
NC_000001.11	2255789	2256084	RefSeqFE_enhancer_GeneID:112577524	NC_000001.11	2205220	2260333	dbSUPER_Brain_Hippocampus_Middle_150_SE_07454	295	295	55113	1	0.00535264
NC_000001.11	2255789	2256084	RefSeqFE_enhancer_GeneID:112577524	NC_000001.11	2226691	2260884	dbSUPER_CD20_SE_11007	295	295	34193	1	0.0086275
NC_000001.11	2391549	2391844	RefSeqFE_enhancer_GeneID:112577525	NC_000001.11	2391522	2391872	ENCODEcCRE_EH38E1311879_promoter	295	295	350	1	0.842857
NC_000001.11	2391549	2391844	RefSeqFE_enhancer_GeneID:112577525	NC_000001.11	2390199	2393601	Ensembl104_promoter:ENSR00000000337	295	295	3402	1	0.0867137
NC_000001.11	3240944	3241239	RefSeqFE_enhancer_GeneID:112577578	NC_000001.11	3240947	3241312	Ensembl104_TF_binding_site:ENSR00000000412	292	295	365	0.989831	0.8
NC_000001.11	3240944	3241239	RefSeqFE_enhancer_GeneID:112577578	NC_000001.11	3150874	3242879	dbSUPER_Aorta_SE_01552	295	295	92005	1	0.00320635
NC_000001.11	3240944	3241239	RefSeqFE_enhancer_GeneID:112577578	NC_000001.11	3153972	3285941	dbSUPER_Gastric_SE_31389	295	295	131969	1	0.00223537
NC_000001.11	3240944	3241239	RefSeqFE_enhancer_GeneID:112577578	NC_000001.11	3154161	3284583	dbSUPER_Pancreatic_islets_SE_65324	295	295	130422	1	0.00226189
NC_000001.11	3274016	3274864	RefSeqFE_enhancer_GeneID:110120751	NC_000001.11	3274016	3274864	VISTA_enhancer_positive_hs705	848	848	848	1	1
NC_000001.11	3274016	3274864	RefSeqFE_enhancer_GeneID:110120751	NC_000001.11	3153972	3285941	dbSUPER_Gastric_SE_31389	848	848	131969	1	0.00642575
NC_000001.11	3274016	3274864	RefSeqFE_enhancer_GeneID:110120751	NC_000001.11	3154161	3284583	dbSUPER_Pancreatic_islets_SE_65324	848	848	130422	1	0.00650197
NC_000001.11	3313184	3313479	RefSeqFE_enhancer_GeneID:112577579	NC_000001.11	3313114	3313464	ENCODEcCRE_EH38E1312550_distal_enhancer	280	295	350	0.949153	0.8
NC_000001.11	3313184	3313479	RefSeqFE_enhancer_GeneID:112577579	NC_000001.11	3313147	3313593	FANTOM5_enhancer_chr1:3313147-3313593	295	295	446	1	0.661435
NC_000001.11	3313184	3313479	RefSeqFE_enhancer_GeneID:112577579	NC_000001.11	3306606	3401272	dbSUPER_Aorta_SE_01548	295	295	94666	1	0.00311622
NC_000001.11	3313184	3313479	RefSeqFE_enhancer_GeneID:112577579	NC_000001.11	3307480	3371089	dbSUPER_Left_Ventricle_SE_40807	295	295	63609	1	0.00463771
NC_000001.11	3313184	3313479	RefSeqFE_enhancer_GeneID:112577579	NC_000001.11	3311570	3358062	dbSUPER_Pancreatic_islets_SE_65787	295	295	46492	1	0.00634518
NC_000001.11	3313184	3313479	RefSeqFE_enhancer_GeneID:112577579	NC_000001.11	3312372	3379144	dbSUPER_Gastric_SE_31959	295	295	66772	1	0.00441802
NC_000001.11	3313184	3313479	RefSeqFE_enhancer_GeneID:112577579	NC_000001.11	3312697	3357268	dbSUPER_Fetal_Intestine_SE_28099	295	295	44571	1	0.00661865
NC_000001.11	3313184	3313479	RefSeqFE_enhancer_GeneID:112577579	NC_000001.11	3312796	3366543	dbSUPER_Pancreas_SE_47515	295	295	53747	1	0.00548868
NC_000001.11	3345528	3349801	RefSeqFE_enhancer_GeneID:110121223	NC_000001.11	3345528	3349801	VISTA_enhancer_positive_hs1912	4273	4273	4273	1	1
NC_000001.11	3345528	3349801	RefSeqFE_enhancer_GeneID:110121223	NC_000001.11	3345800	3346000	Ensembl104_promoter_flanking_region:ENSR00001165012	200	4273	200	0.0468055	1
NC_000001.11	3345528	3349801	RefSeqFE_enhancer_GeneID:110121223	NC_000001.11	3348216	3348503	ENCODEcCRE_EH38E1312586_distal_enhancer	287	4273	287	0.0671659	1
NC_000001.11	3345528	3349801	RefSeqFE_enhancer_GeneID:110121223	NC_000001.11	3348519	3348841	ENCODEcCRE_EH38E1312587_distal_enhancer	322	4273	322	0.0753569	1
NC_000001.11	3345528	3349801	RefSeqFE_enhancer_GeneID:110121223	NC_000001.11	3349133	3349483	ENCODEcCRE_EH38E1312588_distal_enhancer	350	4273	350	0.0819097	1
NC_000001.11	3345528	3349801	RefSeqFE_enhancer_GeneID:110121223	NC_000001.11	3349400	3351400	Ensembl104_CTCF_binding_site:ENSR00000345153	401	4273	2000	0.0938451	0.2005
NC_000001.11	3345528	3349801	RefSeqFE_enhancer_GeneID:110121223	NC_000001.11	3349712	3349980	ENCODEcCRE_EH38E1312589_distal_enhancer	89	4273	268	0.0208285	0.33209
NC_000001.11	3345528	3349801	RefSeqFE_enhancer_GeneID:110121223	NC_000001.11	3306606	3401272	dbSUPER_Aorta_SE_01548	4273	4273	94666	1	0.0451376
NC_000001.11	3345528	3349801	RefSeqFE_enhancer_GeneID:110121223	NC_000001.11	3307480	3371089	dbSUPER_Left_Ventricle_SE_40807	4273	4273	63609	1	0.067176
NC_000001.11	3345528	3349801	RefSeqFE_enhancer_GeneID:110121223	NC_000001.11	3311570	3358062	dbSUPER_Pancreatic_islets_SE_65787	4273	4273	46492	1	0.0919083
NC_000001.11	3345528	3349801	RefSeqFE_enhancer_GeneID:110121223	NC_000001.11	3312372	3379144	dbSUPER_Gastric_SE_31959	4273	4273	66772	1	0.0639939
NC_000001.11	3345528	3349801	RefSeqFE_enhancer_GeneID:110121223	NC_000001.11	3312697	3357268	dbSUPER_Fetal_Intestine_SE_28099	4273	4273	44571	1	0.0958695
NC_000001.11	3345528	3349801	RefSeqFE_enhancer_GeneID:110121223	NC_000001.11	3312796	3366543	dbSUPER_Pancreas_SE_47515	4273	4273	53747	1	0.0795021
NC_000001.11	3345528	3349801	RefSeqFE_enhancer_GeneID:110121223	NC_000001.11	3327455	3355301	dbSUPER_Right_Ventricle_SE_49549	4273	4273	27846	1	0.153451
NC_000001.11	3503968	3504669	RefSeqFE_enhancer_GeneID:108281140	NC_000001.11	3503201	3505599	Ensembl104_promoter_flanking_region:ENSR00000345219	701	701	2398	1	0.292327
NC_000001.11	3503968	3504669	RefSeqFE_enhancer_GeneID:108281140	NC_000001.11	3504176	3504525	ENCODEcCRE_EH38E1312737_distal_enhancer	349	701	349	0.49786	1
NC_000001.11	3503968	3504669	RefSeqFE_enhancer_GeneID:108281140	NC_000001.11	3504197	3504615	FANTOM5_enhancer_chr1:3504197-3504615	418	701	418	0.596291	1
NC_000001.11	3503968	3504669	RefSeqFE_enhancer_GeneID:108281140	NC_000001.11	3481809	3513185	dbSUPER_VACO_503_SE_57628	701	701	31376	1	0.0223419
NC_000001.11	3504196	3504501	RefSeqFE_CAGE_cluster_GeneID:108281140	NC_000001.11	3503201	3505599	Ensembl104_promoter_flanking_region:ENSR00000345219	305	305	2398	1	0.127189
NC_000001.11	3504196	3504501	RefSeqFE_CAGE_cluster_GeneID:108281140	NC_000001.11	3504176	3504525	ENCODEcCRE_EH38E1312737_distal_enhancer	305	305	349	1	0.873926
NC_000001.11	3504196	3504501	RefSeqFE_CAGE_cluster_GeneID:108281140	NC_000001.11	3504197	3504615	FANTOM5_enhancer_chr1:3504197-3504615	304	305	418	0.996721	0.727273
NC_000001.11	3504196	3504501	RefSeqFE_CAGE_cluster_GeneID:108281140	NC_000001.11	3481809	3513185	dbSUPER_VACO_503_SE_57628	305	305	31376	1	0.00972081
NC_000001.11	3796384	3796679	RefSeqFE_enhancer_GeneID:112577581	NC_000001.11	3792999	3797601	Ensembl104_promoter:ENSR00000000516	295	295	4602	1	0.0641026
NC_000001.11	3796384	3796679	RefSeqFE_enhancer_GeneID:112577581	NC_000001.11	3796383	3796733	ENCODEcCRE_EH38E1313041_promoter	295	295	350	1	0.842857
NC_000001.11	5742550	5743135	RefSeqFE_DNAseI_hypersensitive_site_GeneID:108281186	NC_000001.11	5742600	5743000	Ensembl104_CTCF_binding_site:ENSR00000345646	400	585	400	0.683761	1
NC_000001.11	5742550	5743135	RefSeqFE_enhancer_GeneID:108281186	NC_000001.11	5742600	5743000	Ensembl104_CTCF_binding_site:ENSR00000345646	400	585	400	0.683761	1
NC_000001.11	6127708	6128003	RefSeqFE_enhancer_GeneID:112590813	NC_000001.11	6127731	6128080	ENCODEcCRE_EH38E1314129_distal_enhancer	272	295	349	0.922034	0.77937
NC_000001.11	6127708	6128003	RefSeqFE_enhancer_GeneID:112590813	NC_000001.11	6127399	6128001	Ensembl104_promoter:ENSR00001165167	293	295	602	0.99322	0.486711
NC_000001.11	8070378	8071827	RefSeqFE_enhancer_GeneID:110121213	NC_000001.11	8069801	8071600	Ensembl104_promoter_flanking_region:ENSR00000000868	1222	1449	1799	0.84334	0.679266
NC_000001.11	8070378	8071827	RefSeqFE_enhancer_GeneID:110121213	NC_000001.11	8070337	8070684	ENCODEcCRE_EH38E1315714_distal_enhancer	306	1449	347	0.21118	0.881844
NC_000001.11	8070378	8071827	RefSeqFE_enhancer_GeneID:110121213	NC_000001.11	8070378	8071827	VISTA_enhancer_positive_hs1833	1449	1449	1449	1	1
NC_000001.11	8070378	8071827	RefSeqFE_enhancer_GeneID:110121213	NC_000001.11	8070980	8071201	ENCODEcCRE_EH38E1315715_distal_enhancer	221	1449	221	0.152519	1
NC_000001.11	8070378	8071827	RefSeqFE_enhancer_GeneID:110121213	NC_000001.11	8071218	8071440	ENCODEcCRE_EH38E1315716_distal_enhancer	222	1449	222	0.153209	1
NC_000001.11	8070378	8071827	RefSeqFE_enhancer_GeneID:110121213	NC_000001.11	8002900	8098683	dbSUPER_HeLa_SE_34846	1449	1449	95783	1	0.0151279
NC_000001.11	8070378	8071827	RefSeqFE_enhancer_GeneID:110121213	NC_000001.11	8003798	8098720	dbSUPER_HSMM_SE_63484	1449	1449	94922	1	0.0152652
NC_000001.11	8070378	8071827	RefSeqFE_enhancer_GeneID:110121213	NC_000001.11	8003799	8098809	dbSUPER_Skeletal_Muscle_Myoblast_SE_51696	1449	1449	95010	1	0.015251
NC_000001.11	8070378	8071827	RefSeqFE_enhancer_GeneID:110121213	NC_000001.11	8003932	8098211	dbSUPER_Aorta_SE_01874	1449	1449	94279	1	0.0153693
NC_000001.11	8070378	8071827	RefSeqFE_enhancer_GeneID:110121213	NC_000001.11	8024909	8098388	dbSUPER_Small_Intestine_SE_52775	1449	1449	73479	1	0.0197199
NC_000001.11	8070378	8071827	RefSeqFE_enhancer_GeneID:110121213	NC_000001.11	8045314	8098830	dbSUPER_HMEC_SE_36051	1449	1449	53516	1	0.027076
NC_000001.11	8070378	8071827	RefSeqFE_enhancer_GeneID:110121213	NC_000001.11	8060967	8098859	dbSUPER_Fetal_Intestine_SE_28462	1449	1449	37892	1	0.0382403
NC_000001.11	8070378	8071827	RefSeqFE_enhancer_GeneID:110121213	NC_000001.11	8061154	8098355	dbSUPER_VACO_503_SE_57523	1449	1449	37201	1	0.0389506
NC_000001.11	8070378	8071827	RefSeqFE_enhancer_GeneID:110121213	NC_000001.11	8070040	8098554	dbSUPER_NHEK_SE_65162	1449	1449	28514	1	0.0508171
NC_000001.11	8070378	8071827	RefSeqFE_enhancer_GeneID:110121213	NC_000001.11	7993495	8139216	dbSUPER_HSMMtube_SE_36931	1449	1449	145721	1	0.00994366
NC_000001.11	8070378	8071827	RefSeqFE_enhancer_GeneID:110121213	NC_000001.11	8002113	8216599	dbSUPER_Panc1_SE_47106	1449	1449	214486	1	0.00675569
NC_000001.11	8070378	8071827	RefSeqFE_enhancer_GeneID:110121213	NC_000001.11	8003946	8216396	dbSUPER_HCT-116_SE_34231	1449	1449	212450	1	0.00682043
NC_000001.11	8070378	8071827	RefSeqFE_enhancer_GeneID:110121213	NC_000001.11	8003955	8139257	dbSUPER_HCC1954_SE_33765	1449	1449	135302	1	0.0107094
NC_000001.11	8070378	8071827	RefSeqFE_enhancer_GeneID:110121213	NC_000001.11	8070249	8138535	dbSUPER_Fetal_Intestine_Large_SE_29143	1449	1449	68286	1	0.0212196
NC_000001.11	8165708	8166003	RefSeqFE_enhancer_GeneID:112590821	NC_000001.11	8165590	8170999	Ensembl104_promoter_flanking_region:ENSR00000346344	295	295	5409	1	0.0545387
NC_000001.11	8165708	8166003	RefSeqFE_enhancer_GeneID:112590821	NC_000001.11	8165600	8166200	Ensembl104_CTCF_binding_site:ENSR00000250143	295	295	600	1	0.491667
NC_000001.11	8165708	8166003	RefSeqFE_enhancer_GeneID:112590821	NC_000001.11	8165686	8165955	ENCODEcCRE_EH38E1315817_distal_enhancer	247	295	269	0.837288	0.918216
NC_000001.11	8165708	8166003	RefSeqFE_enhancer_GeneID:112590821	NC_000001.11	8146891	8218507	dbSUPER_Pancreatic_islets_SE_65889	295	295	71616	1	0.00411919
NC_000001.11	8165708	8166003	RefSeqFE_enhancer_GeneID:112590821	NC_000001.11	8165981	8216149	dbSUPER_VACO_503_SE_57530	22	295	50168	0.0745763	0.000438527
NC_000001.11	8165708	8166003	RefSeqFE_enhancer_GeneID:112590821	NC_000001.11	8002113	8216599	dbSUPER_Panc1_SE_47106	295	295	214486	1	0.00137538
NC_000001.11	8165708	8166003	RefSeqFE_enhancer_GeneID:112590821	NC_000001.11	8003946	8216396	dbSUPER_HCT-116_SE_34231	295	295	212450	1	0.00138856
NC_000001.11	8173055	8173586	RefSeqFE_enhancer_GeneID:108281189	NC_000001.11	8172861	8173104	ENCODEcCRE_EH38E1315830_distal_enhancer	49	531	243	0.0922787	0.201646
NC_000001.11	8173055	8173586	RefSeqFE_enhancer_GeneID:108281189	NC_000001.11	8173014	8173476	Ensembl104_TF_binding_site:ENSR00001165319	421	531	462	0.792844	0.911255
NC_000001.11	8173055	8173586	RefSeqFE_enhancer_GeneID:108281189	NC_000001.11	8146891	8218507	dbSUPER_Pancreatic_islets_SE_65889	531	531	71616	1	0.00741454
NC_000001.11	8173055	8173586	RefSeqFE_enhancer_GeneID:108281189	NC_000001.11	8165981	8216149	dbSUPER_VACO_503_SE_57530	531	531	50168	1	0.0105844
NC_000001.11	8173055	8173586	RefSeqFE_enhancer_GeneID:108281189	NC_000001.11	8169062	8219266	dbSUPER_u87_SE_55963	531	531	50204	1	0.0105768
NC_000001.11	8173055	8173586	RefSeqFE_enhancer_GeneID:108281189	NC_000001.11	8169273	8240016	dbSUPER_HCC1954_SE_33918	531	531	70743	1	0.00750604
NC_000001.11	8173055	8173586	RefSeqFE_enhancer_GeneID:108281189	NC_000001.11	8173581	8240090	dbSUPER_HeLa_SE_34786	5	531	66509	0.0094162	7.51778e-05
NC_000001.11	8173055	8173586	RefSeqFE_enhancer_GeneID:108281189	NC_000001.11	8002113	8216599	dbSUPER_Panc1_SE_47106	531	531	214486	1	0.00247569
NC_000001.11	8173055	8173586	RefSeqFE_enhancer_GeneID:108281189	NC_000001.11	8003946	8216396	dbSUPER_HCT-116_SE_34231	531	531	212450	1	0.00249941
NC_000001.11	8173278	8173375	RefSeqFE_epigenetically_modified_region_GeneID:108281189	NC_000001.11	8173014	8173476	Ensembl104_TF_binding_site:ENSR00001165319	97	97	462	1	0.209957
NC_000001.11	8173278	8173375	RefSeqFE_epigenetically_modified_region_GeneID:108281189	NC_000001.11	8146891	8218507	dbSUPER_Pancreatic_islets_SE_65889	97	97	71616	1	0.00135445
NC_000001.11	8173278	8173375	RefSeqFE_epigenetically_modified_region_GeneID:108281189	NC_000001.11	8165981	8216149	dbSUPER_VACO_503_SE_57530	97	97	50168	1	0.0019335
NC_000001.11	8173278	8173375	RefSeqFE_epigenetically_modified_region_GeneID:108281189	NC_000001.11	8169062	8219266	dbSUPER_u87_SE_55963	97	97	50204	1	0.00193212
NC_000001.11	8173278	8173375	RefSeqFE_epigenetically_modified_region_GeneID:108281189	NC_000001.11	8169273	8240016	dbSUPER_HCC1954_SE_33918	97	97	70743	1	0.00137116
NC_000001.11	8173278	8173375	RefSeqFE_epigenetically_modified_region_GeneID:108281189	NC_000001.11	8002113	8216599	dbSUPER_Panc1_SE_47106	97	97	214486	1	0.000452244
NC_000001.11	8173278	8173375	RefSeqFE_epigenetically_modified_region_GeneID:108281189	NC_000001.11	8003946	8216396	dbSUPER_HCT-116_SE_34231	97	97	212450	1	0.000456578
NC_000001.11	8211968	8212263	RefSeqFE_enhancer_GeneID:112590822	NC_000001.11	8211847	8212330	FANTOM5_enhancer_chr1:8211847-8212330	295	295	483	1	0.610766
NC_000001.11	8211968	8212263	RefSeqFE_enhancer_GeneID:112590822	NC_000001.11	8211932	8212281	ENCODEcCRE_EH38E1315866_distal_enhancer	295	295	349	1	0.845272
NC_000001.11	8211968	8212263	RefSeqFE_enhancer_GeneID:112590822	NC_000001.11	8146891	8218507	dbSUPER_Pancreatic_islets_SE_65889	295	295	71616	1	0.00411919
NC_000001.11	8211968	8212263	RefSeqFE_enhancer_GeneID:112590822	NC_000001.11	8165981	8216149	dbSUPER_VACO_503_SE_57530	295	295	50168	1	0.00588024
NC_000001.11	8211968	8212263	RefSeqFE_enhancer_GeneID:112590822	NC_000001.11	8169062	8219266	dbSUPER_u87_SE_55963	295	295	50204	1	0.00587603
NC_000001.11	8211968	8212263	RefSeqFE_enhancer_GeneID:112590822	NC_000001.11	8169273	8240016	dbSUPER_HCC1954_SE_33918	295	295	70743	1	0.00417002
NC_000001.11	8211968	8212263	RefSeqFE_enhancer_GeneID:112590822	NC_000001.11	8173581	8240090	dbSUPER_HeLa_SE_34786	295	295	66509	1	0.00443549
NC_000001.11	8211968	8212263	RefSeqFE_enhancer_GeneID:112590822	NC_000001.11	8189285	8218189	dbSUPER_Stomach_Smooth_Muscle_SE_54787	295	295	28904	1	0.0102062
NC_000001.11	8211968	8212263	RefSeqFE_enhancer_GeneID:112590822	NC_000001.11	8189416	8218077	dbSUPER_Aorta_SE_02150	295	295	28661	1	0.0102927
NC_000001.11	8211968	8212263	RefSeqFE_enhancer_GeneID:112590822	NC_000001.11	8200030	8239720	dbSUPER_IMR90_SE_38987	295	295	39690	1	0.0074326
NC_000001.11	8211968	8212263	RefSeqFE_enhancer_GeneID:112590822	NC_000001.11	8002113	8216599	dbSUPER_Panc1_SE_47106	295	295	214486	1	0.00137538
NC_000001.11	8211968	8212263	RefSeqFE_enhancer_GeneID:112590822	NC_000001.11	8003946	8216396	dbSUPER_HCT-116_SE_34231	295	295	212450	1	0.00138856
NC_000001.11	8817589	8817884	RefSeqFE_enhancer_GeneID:112590823	NC_000001.11	8814799	8819001	Ensembl104_promoter:ENSR00000001016	295	295	4202	1	0.0702047
NC_000001.11	8817589	8817884	RefSeqFE_enhancer_GeneID:112590823	NC_000001.11	8817620	8817968	ENCODEcCRE_EH38E1316507_promoter	264	295	348	0.894915	0.758621
NC_000001.11	9371067	9372775	RefSeqFE_enhancer_GeneID:110121160	NC_000001.11	9371983	9372231	ENCODEcCRE_EH38E1317058_distal_enhancer	248	1708	248	0.145199	1
NC_000001.11	9371067	9372775	RefSeqFE_enhancer_GeneID:110121160	NC_000001.11	9314240	9378548	dbSUPER_Ovary_SE_46801	1708	1708	64308	1	0.0265597
NC_000001.11	9371067	9372775	RefSeqFE_enhancer_GeneID:110121160	NC_000001.11	9339208	9402710	dbSUPER_Brain_Anterior_Caudate_SE_04130	1708	1708	63502	1	0.0268968
NC_000001.11	9371067	9372775	RefSeqFE_enhancer_GeneID:110121160	NC_000001.11	9344135	9402641	dbSUPER_Brain_Cingulate_Gyrus_SE_05237	1708	1708	58506	1	0.0291936
NC_000001.11	9371067	9372775	RefSeqFE_enhancer_GeneID:110121160	NC_000001.11	9344334	9401997	dbSUPER_Brain_Hippocampus_Middle_150_SE_07340	1708	1708	57663	1	0.0296204
NC_000001.11	9371067	9372775	RefSeqFE_enhancer_GeneID:110121160	NC_000001.11	9348608	9415239	dbSUPER_HSMMtube_SE_37396	1708	1708	66631	1	0.0256337
NC_000001.11	9371067	9372775	RefSeqFE_enhancer_GeneID:110121160	NC_000001.11	9351771	9401302	dbSUPER_Brain_Inferior_Temporal_Lobe_SE_08488	1708	1708	49531	1	0.0344835
NC_000001.11	9371067	9372775	RefSeqFE_enhancer_GeneID:110121160	NC_000001.11	9371067	9372775	VISTA_enhancer_positive_hs1615	1708	1708	1708	1	1
NC_000001.11	9371067	9372775	RefSeqFE_enhancer_GeneID:110121160	NC_000001.11	9371515	9371841	ENCODEcCRE_EH38E1317057_distal_enhancer	326	1708	326	0.190867	1
NC_000001.11	9371067	9372775	RefSeqFE_enhancer_GeneID:110121160	NC_000001.11	9275605	9386236	dbSUPER_Small_Intestine_SE_52461	1708	1708	110631	1	0.0154387
NC_000001.11	9371067	9372775	RefSeqFE_enhancer_GeneID:110121160	NC_000001.11	9277988	9386502	dbSUPER_Sigmoid_Colon_SE_50208	1708	1708	108514	1	0.0157399
NC_000001.11	9371067	9372775	RefSeqFE_enhancer_GeneID:110121160	NC_000001.11	9289563	9386186	dbSUPER_Esophagus_SE_26667	1708	1708	96623	1	0.017677
NC_000001.11	9371067	9372775	RefSeqFE_enhancer_GeneID:110121160	NC_000001.11	9289685	9414266	dbSUPER_Brain_Hippocampus_Middle_SE_05868	1708	1708	124581	1	0.01371
NC_000001.11	9371067	9372775	RefSeqFE_enhancer_GeneID:110121160	NC_000001.11	9292848	9415132	dbSUPER_Aorta_SE_01570	1708	1708	122284	1	0.0139675
NC_000001.11	9371067	9372775	RefSeqFE_enhancer_GeneID:110121160	NC_000001.11	9372664	9449348	dbSUPER_Panc1_SE_47313	111	1708	76684	0.0649883	0.0014475
NC_000001.11	9593910	9594205	RefSeqFE_enhancer_GeneID:112590825	NC_000001.11	9593737	9594082	ENCODEcCRE_EH38E1317268_distal_enhancer	172	295	345	0.583051	0.498551
NC_000001.11	9593910	9594205	RefSeqFE_enhancer_GeneID:112590825	NC_000001.11	9593800	9594400	Ensembl104_CTCF_binding_site:ENSR00000346797	295	295	600	1	0.491667
NC_000001.11	9593910	9594205	RefSeqFE_silencer_GeneID:112590825	NC_000001.11	9593737	9594082	ENCODEcCRE_EH38E1317268_distal_enhancer	172	295	345	0.583051	0.498551
NC_000001.11	9593910	9594205	RefSeqFE_silencer_GeneID:112590825	NC_000001.11	9593800	9594400	Ensembl104_CTCF_binding_site:ENSR00000346797	295	295	600	1	0.491667
NC_000001.11	9627497	9627962	RefSeqFE_enhancer_GeneID:106783575	NC_000001.11	9626400	9627800	Ensembl104_CTCF_binding_site:ENSR00000346804	303	465	1400	0.651613	0.216429
NC_000001.11	9627497	9627962	RefSeqFE_enhancer_GeneID:106783575	NC_000001.11	9627440	9627601	ENCODEcCRE_EH38E1317290_distal_enhancer	104	465	161	0.223656	0.645963
NC_000001.11	9627497	9627962	RefSeqFE_enhancer_GeneID:106783575	NC_000001.11	9627849	9628050	ENCODEcCRE_EH38E1317291_distal_enhancer	113	465	201	0.243011	0.562189
NC_000001.11	9627497	9627962	RefSeqFE_enhancer_GeneID:106783575	NC_000001.11	9625591	9658085	dbSUPER_Toledo_SE_61808	465	465	32494	1	0.0143103
NC_000001.11	9627497	9627962	RefSeqFE_enhancer_GeneID:106783575	NC_000001.11	9625967	9658565	dbSUPER_Tonsil_SE_62727	465	465	32598	1	0.0142647
NC_000001.11	9627497	9627962	RefSeqFE_enhancer_GeneID:106783575	NC_000001.11	9625340	9733993	dbSUPER_CD20_SE_11127	465	465	108653	1	0.00427968
NC_000001.11	9627497	9627962	RefSeqFE_enhancer_GeneID:106783575	NC_000001.11	9626468	9729868	dbSUPER_CD4p_CD25-_CD45RAp_Naive_SE_17476	465	465	103400	1	0.0044971
NC_000001.11	9627497	9627962	RefSeqFE_enhancer_GeneID:106783575	NC_000001.11	9626549	9731607	dbSUPER_CD4p_CD25-_Il17-_PMAstim_Th_SE_18450	465	465	105058	1	0.00442613
NC_000001.11	9627497	9627962	RefSeqFE_enhancer_GeneID:106783575	NC_000001.11	9627218	9729913	dbSUPER_CD8_primary_SE_22609	465	465	102695	1	0.00452797
NC_000001.11	10672012	10673061	RefSeqFE_enhancer_GeneID:110120648	NC_000001.11	10672012	10673061	VISTA_enhancer_positive_hs289	1049	1049	1049	1	1
NC_000001.11	10672012	10673061	RefSeqFE_enhancer_GeneID:110120648	NC_000001.11	10672800	10673000	Ensembl104_enhancer:ENSR00001165519	200	1049	200	0.190658	1
NC_000001.11	10672012	10673061	RefSeqFE_enhancer_GeneID:110120648	NC_000001.11	10621733	10701266	dbSUPER_Esophagus_SE_26713	1049	1049	79533	1	0.0131895
NC_000001.11	10672012	10673061	RefSeqFE_enhancer_GeneID:110120648	NC_000001.11	10624663	10695990	dbSUPER_H2171_SE_33519	1049	1049	71327	1	0.0147069
NC_000001.11	10672012	10673061	RefSeqFE_enhancer_GeneID:110120648	NC_000001.11	10628113	10738485	dbSUPER_Stomach_Smooth_Muscle_SE_54510	1049	1049	110372	1	0.00950422
NC_000001.11	10672012	10673061	RefSeqFE_enhancer_GeneID:110120648	NC_000001.11	10662200	10672200	Ensembl104_promoter_flanking_region:ENSR00000919659	188	1049	10000	0.179218	0.0188
NC_000001.11	10672012	10673061	RefSeqFE_enhancer_GeneID:110120648	NC_000001.11	10662370	10688812	dbSUPER_HSMMtube_SE_37889	1049	1049	26442	1	0.0396717
NC_000001.11	10672012	10673061	RefSeqFE_enhancer_GeneID:110120648	NC_000001.11	10662373	10694628	dbSUPER_Fetal_Muscle_SE_30102	1049	1049	32255	1	0.0325221
NC_000001.11	10672012	10673061	RefSeqFE_enhancer_GeneID:110120648	NC_000001.11	10662399	10697503	dbSUPER_Psoas_Muscle_SE_48550	1049	1049	35104	1	0.0298826
NC_000001.11	10672012	10673061	RefSeqFE_enhancer_GeneID:110120648	NC_000001.11	10663214	10695652	dbSUPER_Fetal_Intestine_SE_28494	1049	1049	32438	1	0.0323386
NC_000001.11	10672012	10673061	RefSeqFE_enhancer_GeneID:110120648	NC_000001.11	10664177	10738796	dbSUPER_Pancreas_SE_47486	1049	1049	74619	1	0.0140581
NC_000001.11	10672012	10673061	RefSeqFE_enhancer_GeneID:110120648	NC_000001.11	10665890	10699924	dbSUPER_Colon_Crypt_3_SE_25175	1049	1049	34034	1	0.0308221
NC_000001.11	10672012	10673061	RefSeqFE_enhancer_GeneID:110120648	NC_000001.11	10666390	10695470	dbSUPER_VACO_400_SE_57180	1049	1049	29080	1	0.0360729
NC_000001.11	10672012	10673061	RefSeqFE_enhancer_GeneID:110120648	NC_000001.11	10671585	10700663	dbSUPER_Colon_Crypt_1_SE_23439	1049	1049	29078	1	0.0360754
NC_000001.11	10672012	10673061	RefSeqFE_enhancer_GeneID:110120648	NC_000001.11	10671715	10699576	dbSUPER_Colon_Crypt_2_SE_24212	1049	1049	27861	1	0.0376512
NC_000001.11	10672012	10673061	RefSeqFE_enhancer_GeneID:110120648	NC_000001.11	10624118	10823242	dbSUPER_Gastric_SE_31374	1049	1049	199124	1	0.00526807
NC_000001.11	10672012	10673061	RefSeqFE_enhancer_GeneID:110120648	NC_000001.11	10628210	10816205	dbSUPER_LNCaP_SE_41555	1049	1049	187995	1	0.00557994
NC_000001.11	10672012	10673061	RefSeqFE_enhancer_GeneID:110120648	NC_000001.11	10633976	10823835	dbSUPER_Lung_SE_42099	1049	1049	189859	1	0.00552515
NC_000001.11	10672012	10673061	RefSeqFE_enhancer_GeneID:110120648	NC_000001.11	10656630	10828535	dbSUPER_Pancreatic_islets_SE_65281	1049	1049	171905	1	0.00610221
NC_000001.11	10672012	10673061	RefSeqFE_enhancer_GeneID:110120648	NC_000001.11	10661892	10797323	dbSUPER_Left_Ventricle_SE_40607	1049	1049	135431	1	0.00774564
NC_000001.11	10672012	10673061	RefSeqFE_enhancer_GeneID:110120648	NC_000001.11	10662041	10766643	dbSUPER_Right_Atrium_SE_48591	1049	1049	104602	1	0.0100285
NC_000001.11	10721181	10721687	RefSeqFE_enhancer_GeneID:110120666	NC_000001.11	10720401	10730400	Ensembl104_promoter_flanking_region:ENSR00000347105	506	506	9999	1	0.0506051
NC_000001.11	10721181	10721687	RefSeqFE_enhancer_GeneID:110120666	NC_000001.11	10721181	10721687	VISTA_enhancer_positive_hs389	506	506	506	1	1
NC_000001.11	10721181	10721687	RefSeqFE_enhancer_GeneID:110120666	NC_000001.11	10721643	10721954	ENCODEcCRE_EH38E1318293_distal_enhancer	44	506	311	0.0869565	0.141479
NC_000001.11	10721181	10721687	RefSeqFE_enhancer_GeneID:110120666	NC_000001.11	10628113	10738485	dbSUPER_Stomach_Smooth_Muscle_SE_54510	506	506	110372	1	0.0045845
NC_000001.11	10721181	10721687	RefSeqFE_enhancer_GeneID:110120666	NC_000001.11	10664177	10738796	dbSUPER_Pancreas_SE_47486	506	506	74619	1	0.00678111
NC_000001.11	10721181	10721687	RefSeqFE_enhancer_GeneID:110120666	NC_000001.11	10624118	10823242	dbSUPER_Gastric_SE_31374	506	506	199124	1	0.00254113
NC_000001.11	10721181	10721687	RefSeqFE_enhancer_GeneID:110120666	NC_000001.11	10628210	10816205	dbSUPER_LNCaP_SE_41555	506	506	187995	1	0.00269156
NC_000001.11	10721181	10721687	RefSeqFE_enhancer_GeneID:110120666	NC_000001.11	10633976	10823835	dbSUPER_Lung_SE_42099	506	506	189859	1	0.00266514
NC_000001.11	10721181	10721687	RefSeqFE_enhancer_GeneID:110120666	NC_000001.11	10656630	10828535	dbSUPER_Pancreatic_islets_SE_65281	506	506	171905	1	0.00294349
NC_000001.11	10721181	10721687	RefSeqFE_enhancer_GeneID:110120666	NC_000001.11	10661892	10797323	dbSUPER_Left_Ventricle_SE_40607	506	506	135431	1	0.00373622
NC_000001.11	10721181	10721687	RefSeqFE_enhancer_GeneID:110120666	NC_000001.11	10662041	10766643	dbSUPER_Right_Atrium_SE_48591	506	506	104602	1	0.00483738
NC_000001.11	10721181	10721687	RefSeqFE_enhancer_GeneID:110120666	NC_000001.11	10685574	10775201	dbSUPER_Right_Ventricle_SE_49447	506	506	89627	1	0.00564562
NC_000001.11	10721181	10721687	RefSeqFE_enhancer_GeneID:110120666	NC_000001.11	10713272	10797308	dbSUPER_Psoas_Muscle_SE_48119	506	506	84036	1	0.00602123
NC_000001.11	10721181	10721687	RefSeqFE_enhancer_GeneID:110120666	NC_000001.11	10714323	10833489	dbSUPER_Esophagus_SE_26723	506	506	119166	1	0.00424618
NC_000001.11	10721181	10721687	RefSeqFE_enhancer_GeneID:110120666	NC_000001.11	10717647	10820757	dbSUPER_Colon_Crypt_3_SE_24724	506	506	103110	1	0.00490738
NC_000001.11	10735048	10739184	RefSeqFE_enhancer_GeneID:110121258	NC_000001.11	10734933	10735264	ENCODEcCRE_EH38E1318312_distal_enhancer	216	4136	331	0.0522244	0.652568
NC_000001.11	10735048	10739184	RefSeqFE_enhancer_GeneID:110121258	NC_000001.11	10735048	10739184	VISTA_enhancer_positive_hs2094	4136	4136	4136	1	1
NC_000001.11	10735048	10739184	RefSeqFE_enhancer_GeneID:110121258	NC_000001.11	10735280	10735524	ENCODEcCRE_EH38E1318313_distal_enhancer	244	4136	244	0.0589942	1
NC_000001.11	10735048	10739184	RefSeqFE_enhancer_GeneID:110121258	NC_000001.11	10736575	10736920	ENCODEcCRE_EH38E1318315_distal_enhancer	345	4136	345	0.0834139	1
NC_000001.11	10735048	10739184	RefSeqFE_enhancer_GeneID:110121258	NC_000001.11	10737043	10737193	ENCODEcCRE_EH38E1318316_distal_enhancer	150	4136	150	0.0362669	1
NC_000001.11	10735048	10739184	RefSeqFE_enhancer_GeneID:110121258	NC_000001.11	10737267	10737551	ENCODEcCRE_EH38E1318317_distal_enhancer	284	4136	284	0.0686654	1
NC_000001.11	10735048	10739184	RefSeqFE_enhancer_GeneID:110121258	NC_000001.11	10737718	10737897	ENCODEcCRE_EH38E1318318_distal_enhancer	179	4136	179	0.0432785	1
NC_000001.11	10735048	10739184	RefSeqFE_enhancer_GeneID:110121258	NC_000001.11	10738036	10738386	ENCODEcCRE_EH38E1318319_distal_enhancer	350	4136	350	0.0846228	1
NC_000001.11	10735048	10739184	RefSeqFE_enhancer_GeneID:110121258	NC_000001.11	10738408	10738689	ENCODEcCRE_EH38E1318320_distal_enhancer	281	4136	281	0.06794	1
NC_000001.11	10735048	10739184	RefSeqFE_enhancer_GeneID:110121258	NC_000001.11	10738746	10739090	ENCODEcCRE_EH38E1318321_distal_enhancer	344	4136	344	0.0831721	1
NC_000001.11	10735048	10739184	RefSeqFE_enhancer_GeneID:110121258	NC_000001.11	10628113	10738485	dbSUPER_Stomach_Smooth_Muscle_SE_54510	3437	4136	110372	0.830996	0.0311401
NC_000001.11	10735048	10739184	RefSeqFE_enhancer_GeneID:110121258	NC_000001.11	10664177	10738796	dbSUPER_Pancreas_SE_47486	3748	4136	74619	0.90619	0.0502285
NC_000001.11	10735048	10739184	RefSeqFE_enhancer_GeneID:110121258	NC_000001.11	10624118	10823242	dbSUPER_Gastric_SE_31374	4136	4136	199124	1	0.020771
NC_000001.11	10735048	10739184	RefSeqFE_enhancer_GeneID:110121258	NC_000001.11	10628210	10816205	dbSUPER_LNCaP_SE_41555	4136	4136	187995	1	0.0220006
NC_000001.11	10735048	10739184	RefSeqFE_enhancer_GeneID:110121258	NC_000001.11	10633976	10823835	dbSUPER_Lung_SE_42099	4136	4136	189859	1	0.0217846
NC_000001.11	10735048	10739184	RefSeqFE_enhancer_GeneID:110121258	NC_000001.11	10656630	10828535	dbSUPER_Pancreatic_islets_SE_65281	4136	4136	171905	1	0.0240598
NC_000001.11	10735048	10739184	RefSeqFE_enhancer_GeneID:110121258	NC_000001.11	10661892	10797323	dbSUPER_Left_Ventricle_SE_40607	4136	4136	135431	1	0.0305395
NC_000001.11	10735048	10739184	RefSeqFE_enhancer_GeneID:110121258	NC_000001.11	10662041	10766643	dbSUPER_Right_Atrium_SE_48591	4136	4136	104602	1	0.0395404
NC_000001.11	10735048	10739184	RefSeqFE_enhancer_GeneID:110121258	NC_000001.11	10685574	10775201	dbSUPER_Right_Ventricle_SE_49447	4136	4136	89627	1	0.0461468
NC_000001.11	10735048	10739184	RefSeqFE_enhancer_GeneID:110121258	NC_000001.11	10713272	10797308	dbSUPER_Psoas_Muscle_SE_48119	4136	4136	84036	1	0.049217
NC_000001.11	10735048	10739184	RefSeqFE_enhancer_GeneID:110121258	NC_000001.11	10714323	10833489	dbSUPER_Esophagus_SE_26723	4136	4136	119166	1	0.0347079
NC_000001.11	10735048	10739184	RefSeqFE_enhancer_GeneID:110121258	NC_000001.11	10717647	10820757	dbSUPER_Colon_Crypt_3_SE_24724	4136	4136	103110	1	0.0401125
NC_000001.11	10735048	10739184	RefSeqFE_enhancer_GeneID:110121258	NC_000001.11	10723491	10820195	dbSUPER_Colon_Crypt_1_SE_23090	4136	4136	96704	1	0.0427697
NC_000001.11	10735048	10739184	RefSeqFE_enhancer_GeneID:110121258	NC_000001.11	10731359	10820788	dbSUPER_Small_Intestine_SE_52397	4136	4136	89429	1	0.046249
NC_000001.11	10791512	10792116	RefSeqFE_enhancer_GeneID:110120672	NC_000001.11	10791399	10791601	Ensembl104_promoter:ENSR00001165533	89	604	202	0.147351	0.440594
NC_000001.11	10791512	10792116	RefSeqFE_enhancer_GeneID:110120672	NC_000001.11	10791512	10792116	VISTA_enhancer_positive_hs408	604	604	604	1	1
NC_000001.11	10791512	10792116	RefSeqFE_enhancer_GeneID:110120672	NC_000001.11	10791566	10791736	ENCODEcCRE_EH38E1318380_distal_enhancer	170	604	170	0.281457	1
NC_000001.11	10791512	10792116	RefSeqFE_enhancer_GeneID:110120672	NC_000001.11	10791792	10791977	ENCODEcCRE_EH38E1318381_distal_enhancer	185	604	185	0.306291	1
NC_000001.11	10791512	10792116	RefSeqFE_enhancer_GeneID:110120672	NC_000001.11	10749429	10838238	dbSUPER_H2171_SE_33443	604	604	88809	1	0.00680111
NC_000001.11	10791512	10792116	RefSeqFE_enhancer_GeneID:110120672	NC_000001.11	10754543	10797005	dbSUPER_Ly4_SE_59918	604	604	42462	1	0.0142245
NC_000001.11	10791512	10792116	RefSeqFE_enhancer_GeneID:110120672	NC_000001.11	10755007	10820171	dbSUPER_Colon_Crypt_2_SE_23754	604	604	65164	1	0.00926892
NC_000001.11	10791512	10792116	RefSeqFE_enhancer_GeneID:110120672	NC_000001.11	10755305	10819597	dbSUPER_Sigmoid_Colon_SE_50332	604	604	64292	1	0.00939464
NC_000001.11	10791512	10792116	RefSeqFE_enhancer_GeneID:110120672	NC_000001.11	10765413	10795320	dbSUPER_GLC16_SE_63279	604	604	29907	1	0.0201959
NC_000001.11	10791512	10792116	RefSeqFE_enhancer_GeneID:110120672	NC_000001.11	10624118	10823242	dbSUPER_Gastric_SE_31374	604	604	199124	1	0.00303329
NC_000001.11	10791512	10792116	RefSeqFE_enhancer_GeneID:110120672	NC_000001.11	10628210	10816205	dbSUPER_LNCaP_SE_41555	604	604	187995	1	0.00321285
NC_000001.11	10791512	10792116	RefSeqFE_enhancer_GeneID:110120672	NC_000001.11	10633976	10823835	dbSUPER_Lung_SE_42099	604	604	189859	1	0.00318131
NC_000001.11	10791512	10792116	RefSeqFE_enhancer_GeneID:110120672	NC_000001.11	10656630	10828535	dbSUPER_Pancreatic_islets_SE_65281	604	604	171905	1	0.00351357
NC_000001.11	10791512	10792116	RefSeqFE_enhancer_GeneID:110120672	NC_000001.11	10661892	10797323	dbSUPER_Left_Ventricle_SE_40607	604	604	135431	1	0.00445984
NC_000001.11	10791512	10792116	RefSeqFE_enhancer_GeneID:110120672	NC_000001.11	10713272	10797308	dbSUPER_Psoas_Muscle_SE_48119	604	604	84036	1	0.0071874
NC_000001.11	10791512	10792116	RefSeqFE_enhancer_GeneID:110120672	NC_000001.11	10714323	10833489	dbSUPER_Esophagus_SE_26723	604	604	119166	1	0.00506856
NC_000001.11	10791512	10792116	RefSeqFE_enhancer_GeneID:110120672	NC_000001.11	10717647	10820757	dbSUPER_Colon_Crypt_3_SE_24724	604	604	103110	1	0.00585782
NC_000001.11	10791512	10792116	RefSeqFE_enhancer_GeneID:110120672	NC_000001.11	10723491	10820195	dbSUPER_Colon_Crypt_1_SE_23090	604	604	96704	1	0.00624586
NC_000001.11	10791512	10792116	RefSeqFE_enhancer_GeneID:110120672	NC_000001.11	10731359	10820788	dbSUPER_Small_Intestine_SE_52397	604	604	89429	1	0.00675396
NC_000001.11	10905071	10906087	RefSeqFE_enhancer_GeneID:110120623	NC_000001.11	10904872	10905222	ENCODEcCRE_EH38E1318483_distal_enhancer	151	1016	350	0.148622	0.431429
NC_000001.11	10905071	10906087	RefSeqFE_enhancer_GeneID:110120623	NC_000001.11	10905071	10906087	VISTA_enhancer_positive_hs241	1016	1016	1016	1	1
NC_000001.11	10905071	10906087	RefSeqFE_enhancer_GeneID:110120623	NC_000001.11	10905701	10906043	ENCODEcCRE_EH38E1318484_distal_enhancer	342	1016	342	0.336614	1
NC_000001.11	11846818	11848609	RefSeqFE_enhancer_GeneID:114827827	NC_000001.11	11846818	11848609	VISTA_enhancer_positive_hs2123	1791	1791	1791	1	1
NC_000001.11	11846818	11848609	RefSeqFE_enhancer_GeneID:114827827	NC_000001.11	11847601	11848800	Ensembl104_promoter_flanking_region:ENSR00001165614	1008	1791	1199	0.562814	0.840701
NC_000001.11	11885470	11889433	RefSeqFE_enhancer_GeneID:110121260	NC_000001.11	11885400	11886800	Ensembl104_promoter_flanking_region:ENSR00000347456	1330	3963	1400	0.335604	0.95
NC_000001.11	11885470	11889433	RefSeqFE_enhancer_GeneID:110121260	NC_000001.11	11885470	11889433	VISTA_enhancer_positive_hs2125	3963	3963	3963	1	1
NC_000001.11	11885470	11889433	RefSeqFE_enhancer_GeneID:110121260	NC_000001.11	11886053	11886291	ENCODEcCRE_EH38E1319190_distal_enhancer	238	3963	238	0.0600555	1
NC_000001.11	11885470	11889433	RefSeqFE_enhancer_GeneID:110121260	NC_000001.11	11886989	11887159	FANTOM5_enhancer_chr1:11886989-11887159	170	3963	170	0.0428968	1
NC_000001.11	11885470	11889433	RefSeqFE_enhancer_GeneID:110121260	NC_000001.11	11887000	11887400	Ensembl104_promoter_flanking_region:ENSR00001165617	400	3963	400	0.100934	1
NC_000001.11	11885470	11889433	RefSeqFE_enhancer_GeneID:110121260	NC_000001.11	11887227	11887557	ENCODEcCRE_EH38E1319192_distal_enhancer	330	3963	330	0.0832702	1
NC_000001.11	11885470	11889433	RefSeqFE_enhancer_GeneID:110121260	NC_000001.11	11887600	11888000	Ensembl104_CTCF_binding_site:ENSR00000347457	400	3963	400	0.100934	1
NC_000001.11	11885470	11889433	RefSeqFE_enhancer_GeneID:110121260	NC_000001.11	11887734	11887940	ENCODEcCRE_EH38E1319193_distal_enhancer	206	3963	206	0.0519808	1
NC_000001.11	11885470	11889433	RefSeqFE_enhancer_GeneID:110121260	NC_000001.11	11888581	11888930	ENCODEcCRE_EH38E1319194_distal_enhancer	349	3963	349	0.0880646	1
NC_000001.11	11885470	11889433	RefSeqFE_enhancer_GeneID:110121260	NC_000001.11	11856430	11889564	dbSUPER_Left_Ventricle_SE_40948	3963	3963	33134	1	0.119605
NC_000001.11	11885470	11889433	RefSeqFE_enhancer_GeneID:110121260	NC_000001.11	11873712	11889196	dbSUPER_Right_Ventricle_SE_49584	3726	3963	15484	0.940197	0.240635
NC_000001.11	11926351	11926646	RefSeqFE_enhancer_GeneID:112577472	NC_000001.11	11923799	11927201	Ensembl104_promoter:ENSR00000001461	295	295	3402	1	0.0867137
NC_000001.11	11926351	11926646	RefSeqFE_enhancer_GeneID:112577472	NC_000001.11	11926347	11926697	ENCODEcCRE_EH38E1319233_promoter	295	295	350	1	0.842857
NC_000001.11	11926351	11926646	RefSeqFE_enhancer_GeneID:112577472	NC_000001.11	11906760	11945636	dbSUPER_HCT-116_SE_34570	295	295	38876	1	0.00758823
NC_000001.11	11926351	11926646	RefSeqFE_enhancer_GeneID:112577472	NC_000001.11	11906770	11961549	dbSUPER_Brain_Hippocampus_Middle_SE_06308	295	295	54779	1	0.00538528
NC_000001.11	11926351	11926646	RefSeqFE_enhancer_GeneID:112577472	NC_000001.11	11907310	11939069	dbSUPER_CD4_Memory_Primary_7pool_SE_14675	295	295	31759	1	0.00928871
NC_000001.11	11926351	11926646	RefSeqFE_enhancer_GeneID:112577472	NC_000001.11	11907345	11962192	dbSUPER_Brain_Hippocampus_Middle_150_SE_07453	295	295	54847	1	0.0053786
NC_000001.11	11926351	11926646	RefSeqFE_enhancer_GeneID:112577472	NC_000001.11	11907381	11961488	dbSUPER_Brain_Inferior_Temporal_Lobe_SE_08423	295	295	54107	1	0.00545216
NC_000001.11	11926351	11926646	RefSeqFE_enhancer_GeneID:112577472	NC_000001.11	11907402	11961734	dbSUPER_Brain_Cingulate_Gyrus_SE_05426	295	295	54332	1	0.00542958
NC_000001.11	11926351	11926646	RefSeqFE_enhancer_GeneID:112577472	NC_000001.11	11907565	11931489	dbSUPER_Spleen_SE_54351	295	295	23924	1	0.0123307
NC_000001.11	11926351	11926646	RefSeqFE_enhancer_GeneID:112577472	NC_000001.11	11907745	11961718	dbSUPER_Brain_Anterior_Caudate_SE_04401	295	295	53973	1	0.0054657
NC_000001.11	11944311	11944606	RefSeqFE_enhancer_GeneID:112577486	NC_000001.11	11944285	11944635	ENCODEcCRE_EH38E1319251_distal_enhancer	295	295	350	1	0.842857
NC_000001.11	11944311	11944606	RefSeqFE_enhancer_GeneID:112577486	NC_000001.11	11943400	11945400	Ensembl104_promoter_flanking_region:ENSR00000919814	295	295	2000	1	0.1475
NC_000001.11	11944311	11944606	RefSeqFE_enhancer_GeneID:112577486	NC_000001.11	11906760	11945636	dbSUPER_HCT-116_SE_34570	295	295	38876	1	0.00758823
NC_000001.11	11944311	11944606	RefSeqFE_enhancer_GeneID:112577486	NC_000001.11	11906770	11961549	dbSUPER_Brain_Hippocampus_Middle_SE_06308	295	295	54779	1	0.00538528
NC_000001.11	11944311	11944606	RefSeqFE_enhancer_GeneID:112577486	NC_000001.11	11907345	11962192	dbSUPER_Brain_Hippocampus_Middle_150_SE_07453	295	295	54847	1	0.0053786
NC_000001.11	11944311	11944606	RefSeqFE_enhancer_GeneID:112577486	NC_000001.11	11907381	11961488	dbSUPER_Brain_Inferior_Temporal_Lobe_SE_08423	295	295	54107	1	0.00545216
NC_000001.11	11944311	11944606	RefSeqFE_enhancer_GeneID:112577486	NC_000001.11	11907402	11961734	dbSUPER_Brain_Cingulate_Gyrus_SE_05426	295	295	54332	1	0.00542958
NC_000001.11	11944311	11944606	RefSeqFE_enhancer_GeneID:112577486	NC_000001.11	11907745	11961718	dbSUPER_Brain_Anterior_Caudate_SE_04401	295	295	53973	1	0.0054657
NC_000001.11	12038248	12039371	RefSeqFE_transcriptional_cis_regulatory_region_GeneID:115801416	NC_000001.11	12038428	12038720	ENCODEcCRE_EH38E1319331_proximal_enhancer	292	1123	292	0.260018	1
NC_000001.11	12038248	12039371	RefSeqFE_transcriptional_cis_regulatory_region_GeneID:115801416	NC_000001.11	12038790	12039139	ENCODEcCRE_EH38E1319332_proximal_enhancer	349	1123	349	0.310775	1
NC_000001.11	12038248	12039371	RefSeqFE_transcriptional_cis_regulatory_region_GeneID:115801416	NC_000001.11	12039170	12039497	ENCODEcCRE_EH38E1319333_distal_enhancer	201	1123	327	0.178985	0.614679
NC_000001.11	12038248	12039371	RefSeqFE_transcriptional_cis_regulatory_region_GeneID:115801416	NC_000001.11	12033401	12042599	Ensembl104_promoter_flanking_region:ENSR00000919829	1123	1123	9198	1	0.122092
NC_000001.11	12038248	12039371	RefSeqFE_transcriptional_cis_regulatory_region_GeneID:115801416	NC_000001.11	12039091	12089130	dbSUPER_GM12878_SE_32538	280	1123	50039	0.249332	0.00559564
NC_000001.11	12433486	12433631	RefSeqFE_enhancer_GeneID:111591499	NC_000001.11	12433257	12433630	FANTOM5_enhancer_chr1:12433257-12433630	144	145	373	0.993103	0.386059
NC_000001.11	12433486	12433631	RefSeqFE_enhancer_GeneID:111591499	NC_000001.11	12433490	12433831	ENCODEcCRE_EH38E1319698_distal_enhancer	141	145	341	0.972414	0.41349
NC_000001.11	12433486	12433631	RefSeqFE_enhancer_GeneID:111591499	NC_000001.11	12401212	12481929	dbSUPER_Osteoblasts_SE_45864	145	145	80717	1	0.0017964
NC_000001.11	12433486	12433631	RefSeqFE_enhancer_GeneID:111591499	NC_000001.11	12406169	12487282	dbSUPER_Esophagus_SE_26716	145	145	81113	1	0.00178763
NC_000001.11	12433486	12433631	RefSeqFE_enhancer_GeneID:111591499	NC_000001.11	12422600	12480002	dbSUPER_Fetal_Muscle_SE_29871	145	145	57402	1	0.00252604
NC_000001.11	12433486	12433631	RefSeqFE_enhancer_GeneID:111591499	NC_000001.11	12422718	12512535	dbSUPER_Aorta_SE_01743	145	145	89817	1	0.00161439
NC_000001.11	12433486	12433631	RefSeqFE_enhancer_GeneID:111591499	NC_000001.11	12422775	12497204	dbSUPER_Left_Ventricle_SE_41209	145	145	74429	1	0.00194817
NC_000001.11	12433486	12433631	RefSeqFE_enhancer_GeneID:111591499	NC_000001.11	12422870	12497374	dbSUPER_Right_Atrium_SE_49026	145	145	74504	1	0.0019462
NC_000001.11	12433486	12433631	RefSeqFE_enhancer_GeneID:111591499	NC_000001.11	12422994	12512730	dbSUPER_Skeletal_Muscle_SE_51539	145	145	89736	1	0.00161585
NC_000001.11	12433486	12433631	RefSeqFE_enhancer_GeneID:111591499	NC_000001.11	12423307	12482448	dbSUPER_Duodenum_Smooth_Muscle_SE_26086	145	145	59141	1	0.00245177
NC_000001.11	12433486	12433631	RefSeqFE_enhancer_GeneID:111591499	NC_000001.11	12427512	12482319	dbSUPER_Fetal_Intestine_Large_SE_29231	145	145	54807	1	0.00264565
NC_000001.11	12433486	12433631	RefSeqFE_enhancer_GeneID:111591499	NC_000001.11	12427997	12512080	dbSUPER_K562_SE_39882	145	145	84083	1	0.00172449
NC_000001.11	12433486	12433631	RefSeqFE_enhancer_GeneID:111591499	NC_000001.11	12432553	12497274	dbSUPER_Lung_SE_42647	145	145	64721	1	0.00224039
NC_000001.11	12433486	12433631	RefSeqFE_enhancer_GeneID:111591499	NC_000001.11	12432563	12455263	dbSUPER_CD4_Memory_Primary_7pool_SE_15065	145	145	22700	1	0.00638767
NC_000001.11	12433486	12433631	RefSeqFE_enhancer_GeneID:111591499	NC_000001.11	12432676	12506480	dbSUPER_HSMMtube_SE_37319	145	145	73804	1	0.00196466
NC_000001.11	12433486	12433631	RefSeqFE_enhancer_GeneID:111591499	NC_000001.11	12432689	12482446	dbSUPER_Small_Intestine_SE_52815	145	145	49757	1	0.00291416
NC_000001.11	12433486	12433631	RefSeqFE_enhancer_GeneID:111591499	NC_000001.11	12432689	12487434	dbSUPER_HCC1954_SE_33776	145	145	54745	1	0.00264864
NC_000001.11	12433486	12433631	RefSeqFE_enhancer_GeneID:111591499	NC_000001.11	12432726	12497735	dbSUPER_Stomach_Smooth_Muscle_SE_54847	145	145	65009	1	0.00223046
NC_000001.11	12433486	12433631	RefSeqFE_enhancer_GeneID:111591499	NC_000001.11	12432821	12482447	dbSUPER_Sigmoid_Colon_SE_50544	145	145	49626	1	0.00292186
NC_000001.11	12433486	12433631	RefSeqFE_enhancer_GeneID:111591499	NC_000001.11	12432911	12479547	dbSUPER_CD8_Memory_7pool_SE_20910	145	145	46636	1	0.00310919
NC_000001.11	12433486	12433631	RefSeqFE_enhancer_GeneID:111591499	NC_000001.11	12433251	12481636	dbSUPER_Bladder_SE_03005	145	145	48385	1	0.0029968
NC_000001.11	12433486	12433631	RefSeqFE_enhancer_GeneID:111591499	NC_000001.11	12395793	12638911	dbSUPER_Adipose_Nuclei_SE_00009	145	145	243118	1	0.000596418
NC_000001.11	12433553	12433564	RefSeqFE_transcriptional_cis_regulatory_region_GeneID:111591499	NC_000001.11	12433257	12433630	FANTOM5_enhancer_chr1:12433257-12433630	11	11	373	1	0.0294906
NC_000001.11	12433553	12433564	RefSeqFE_transcriptional_cis_regulatory_region_GeneID:111591499	NC_000001.11	12433490	12433831	ENCODEcCRE_EH38E1319698_distal_enhancer	11	11	341	1	0.0322581
NC_000001.11	12433553	12433564	RefSeqFE_transcriptional_cis_regulatory_region_GeneID:111591499	NC_000001.11	12401212	12481929	dbSUPER_Osteoblasts_SE_45864	11	11	80717	1	0.000136279
NC_000001.11	12433553	12433564	RefSeqFE_transcriptional_cis_regulatory_region_GeneID:111591499	NC_000001.11	12406169	12487282	dbSUPER_Esophagus_SE_26716	11	11	81113	1	0.000135613
NC_000001.11	12433553	12433564	RefSeqFE_transcriptional_cis_regulatory_region_GeneID:111591499	NC_000001.11	12422600	12480002	dbSUPER_Fetal_Muscle_SE_29871	11	11	57402	1	0.000191631
NC_000001.11	12433553	12433564	RefSeqFE_transcriptional_cis_regulatory_region_GeneID:111591499	NC_000001.11	12422718	12512535	dbSUPER_Aorta_SE_01743	11	11	89817	1	0.000122471
NC_000001.11	12433553	12433564	RefSeqFE_transcriptional_cis_regulatory_region_GeneID:111591499	NC_000001.11	12422775	12497204	dbSUPER_Left_Ventricle_SE_41209	11	11	74429	1	0.000147792
NC_000001.11	12433553	12433564	RefSeqFE_transcriptional_cis_regulatory_region_GeneID:111591499	NC_000001.11	12422870	12497374	dbSUPER_Right_Atrium_SE_49026	11	11	74504	1	0.000147643
NC_000001.11	12433553	12433564	RefSeqFE_transcriptional_cis_regulatory_region_GeneID:111591499	NC_000001.11	12422994	12512730	dbSUPER_Skeletal_Muscle_SE_51539	11	11	89736	1	0.000122582
NC_000001.11	12433553	12433564	RefSeqFE_transcriptional_cis_regulatory_region_GeneID:111591499	NC_000001.11	12423307	12482448	dbSUPER_Duodenum_Smooth_Muscle_SE_26086	11	11	59141	1	0.000185996
NC_000001.11	12433553	12433564	RefSeqFE_transcriptional_cis_regulatory_region_GeneID:111591499	NC_000001.11	12427512	12482319	dbSUPER_Fetal_Intestine_Large_SE_29231	11	11	54807	1	0.000200704
NC_000001.11	12433553	12433564	RefSeqFE_transcriptional_cis_regulatory_region_GeneID:111591499	NC_000001.11	12427997	12512080	dbSUPER_K562_SE_39882	11	11	84083	1	0.000130823
NC_000001.11	12433553	12433564	RefSeqFE_transcriptional_cis_regulatory_region_GeneID:111591499	NC_000001.11	12432553	12497274	dbSUPER_Lung_SE_42647	11	11	64721	1	0.00016996
NC_000001.11	12433553	12433564	RefSeqFE_transcriptional_cis_regulatory_region_GeneID:111591499	NC_000001.11	12432563	12455263	dbSUPER_CD4_Memory_Primary_7pool_SE_15065	11	11	22700	1	0.000484581
NC_000001.11	12433553	12433564	RefSeqFE_transcriptional_cis_regulatory_region_GeneID:111591499	NC_000001.11	12432676	12506480	dbSUPER_HSMMtube_SE_37319	11	11	73804	1	0.000149043
NC_000001.11	12433553	12433564	RefSeqFE_transcriptional_cis_regulatory_region_GeneID:111591499	NC_000001.11	12432689	12482446	dbSUPER_Small_Intestine_SE_52815	11	11	49757	1	0.000221074
NC_000001.11	12433553	12433564	RefSeqFE_transcriptional_cis_regulatory_region_GeneID:111591499	NC_000001.11	12432689	12487434	dbSUPER_HCC1954_SE_33776	11	11	54745	1	0.000200932
NC_000001.11	12433553	12433564	RefSeqFE_transcriptional_cis_regulatory_region_GeneID:111591499	NC_000001.11	12432726	12497735	dbSUPER_Stomach_Smooth_Muscle_SE_54847	11	11	65009	1	0.000169207
NC_000001.11	12433553	12433564	RefSeqFE_transcriptional_cis_regulatory_region_GeneID:111591499	NC_000001.11	12432821	12482447	dbSUPER_Sigmoid_Colon_SE_50544	11	11	49626	1	0.000221658
NC_000001.11	12433553	12433564	RefSeqFE_transcriptional_cis_regulatory_region_GeneID:111591499	NC_000001.11	12432911	12479547	dbSUPER_CD8_Memory_7pool_SE_20910	11	11	46636	1	0.000235869
NC_000001.11	12433553	12433564	RefSeqFE_transcriptional_cis_regulatory_region_GeneID:111591499	NC_000001.11	12433251	12481636	dbSUPER_Bladder_SE_03005	11	11	48385	1	0.000227343
NC_000001.11	12433553	12433564	RefSeqFE_transcriptional_cis_regulatory_region_GeneID:111591499	NC_000001.11	12395793	12638911	dbSUPER_Adipose_Nuclei_SE_00009	11	11	243118	1	4.52455e-05
NC_000001.11	12541562	12541857	RefSeqFE_enhancer_GeneID:112577487	NC_000001.11	12541535	12541879	ENCODEcCRE_EH38E1319843_distal_enhancer	295	295	344	1	0.857558
NC_000001.11	12541562	12541857	RefSeqFE_enhancer_GeneID:112577487	NC_000001.11	12538938	12558735	dbSUPER_HSMMtube_SE_37524	295	295	19797	1	0.0149012
NC_000001.11	12541562	12541857	RefSeqFE_enhancer_GeneID:112577487	NC_000001.11	12395793	12638911	dbSUPER_Adipose_Nuclei_SE_00009	295	295	243118	1	0.0012134
NC_000001.11	12541562	12541857	RefSeqFE_enhancer_GeneID:112577487	NC_000001.11	12520778	12622950	dbSUPER_Panc1_SE_47179	295	295	102172	1	0.00288729
NC_000001.11	12541562	12541857	RefSeqFE_enhancer_GeneID:112577487	NC_000001.11	12525124	12622933	dbSUPER_Lung_SE_42271	295	295	97809	1	0.00301608
NC_000001.11	12541562	12541857	RefSeqFE_enhancer_GeneID:112577487	NC_000001.11	12525219	12621108	dbSUPER_HCC1954_SE_33994	295	295	95889	1	0.00307647
NC_000001.11	12541562	12541857	RefSeqFE_enhancer_GeneID:112577487	NC_000001.11	12527617	12623094	dbSUPER_Esophagus_SE_26610	295	295	95477	1	0.00308975
NC_000001.11	12541562	12541857	RefSeqFE_enhancer_GeneID:112577487	NC_000001.11	12539076	12623358	dbSUPER_Aorta_SE_01632	295	295	84282	1	0.00350015
NC_000001.11	12541562	12541857	RefSeqFE_enhancer_GeneID:112577487	NC_000001.11	12539288	12637381	dbSUPER_Skeletal_Muscle_SE_51223	295	295	98093	1	0.00300735
NC_000001.11	12541562	12541857	RefSeqFE_enhancer_GeneID:112577487	NC_000001.11	12539823	12637395	dbSUPER_Left_Ventricle_SE_40699	295	295	97572	1	0.00302341
NC_000001.11	12573880	12574175	RefSeqFE_enhancer_GeneID:112577488	NC_000001.11	12572506	12574799	Ensembl104_promoter_flanking_region:ENSR00000919906	295	295	2293	1	0.128652
NC_000001.11	12573880	12574175	RefSeqFE_enhancer_GeneID:112577488	NC_000001.11	12573761	12574094	ENCODEcCRE_EH38E1319873_distal_enhancer	214	295	333	0.725424	0.642643
NC_000001.11	12573880	12574175	RefSeqFE_enhancer_GeneID:112577488	NC_000001.11	12395793	12638911	dbSUPER_Adipose_Nuclei_SE_00009	295	295	243118	1	0.0012134
NC_000001.11	12573880	12574175	RefSeqFE_enhancer_GeneID:112577488	NC_000001.11	12520778	12622950	dbSUPER_Panc1_SE_47179	295	295	102172	1	0.00288729
NC_000001.11	12573880	12574175	RefSeqFE_enhancer_GeneID:112577488	NC_000001.11	12525124	12622933	dbSUPER_Lung_SE_42271	295	295	97809	1	0.00301608
NC_000001.11	12573880	12574175	RefSeqFE_enhancer_GeneID:112577488	NC_000001.11	12525219	12621108	dbSUPER_HCC1954_SE_33994	295	295	95889	1	0.00307647
NC_000001.11	12573880	12574175	RefSeqFE_enhancer_GeneID:112577488	NC_000001.11	12527617	12623094	dbSUPER_Esophagus_SE_26610	295	295	95477	1	0.00308975
NC_000001.11	12573880	12574175	RefSeqFE_enhancer_GeneID:112577488	NC_000001.11	12539076	12623358	dbSUPER_Aorta_SE_01632	295	295	84282	1	0.00350015
NC_000001.11	12573880	12574175	RefSeqFE_enhancer_GeneID:112577488	NC_000001.11	12539288	12637381	dbSUPER_Skeletal_Muscle_SE_51223	295	295	98093	1	0.00300735
NC_000001.11	12573880	12574175	RefSeqFE_enhancer_GeneID:112577488	NC_000001.11	12539823	12637395	dbSUPER_Left_Ventricle_SE_40699	295	295	97572	1	0.00302341
NC_000001.11	12573880	12574175	RefSeqFE_enhancer_GeneID:112577488	NC_000001.11	12572435	12620763	dbSUPER_Osteoblasts_SE_46249	295	295	48328	1	0.00610412
NC_000001.11	12573880	12574175	RefSeqFE_enhancer_GeneID:112577488	NC_000001.11	12572645	12620009	dbSUPER_Right_Ventricle_SE_49489	295	295	47364	1	0.00622836
NC_000001.11	14952772	14953067	RefSeqFE_enhancer_GeneID:112577491	NC_000001.11	14952578	14953599	Ensembl104_promoter_flanking_region:ENSR00000920099	295	295	1021	1	0.288932
NC_000001.11	14952772	14953067	RefSeqFE_enhancer_GeneID:112577491	NC_000001.11	14952819	14953135	ENCODEcCRE_EH38E1321058_distal_enhancer	248	295	316	0.840678	0.78481
NC_000001.11	14952772	14953067	RefSeqFE_enhancer_GeneID:112577491	NC_000001.11	14878577	15067743	dbSUPER_Spleen_SE_53292	295	295	189166	1	0.00155948
NC_000001.11	14952772	14953067	RefSeqFE_enhancer_GeneID:112577491	NC_000001.11	14939413	15029789	dbSUPER_Esophagus_SE_26798	295	295	90376	1	0.00326414
NC_000001.11	15800233	15800528	RefSeqFE_enhancer_GeneID:112577504	NC_000001.11	15798999	15800801	Ensembl104_promoter:ENSR00001165885	295	295	1802	1	0.163707
NC_000001.11	15800233	15800528	RefSeqFE_enhancer_GeneID:112577504	NC_000001.11	15800297	15800639	ENCODEcCRE_EH38E1321879_distal_enhancer	231	295	342	0.783051	0.675439
NC_000001.11	15800233	15800528	RefSeqFE_enhancer_GeneID:112577504	NC_000001.11	15776256	15802970	dbSUPER_VACO_503_SE_57781	295	295	26714	1	0.0110429
NC_000001.11	15800233	15800528	RefSeqFE_enhancer_GeneID:112577504	NC_000001.11	15788261	15801135	dbSUPER_NHEK_SE_65105	295	295	12874	1	0.0229144
NC_000001.11	15800233	15800528	RefSeqFE_enhancer_GeneID:112577504	NC_000001.11	15788300	15801497	dbSUPER_HSMM_SE_64100	295	295	13197	1	0.0223536
NC_000001.11	15800233	15800528	RefSeqFE_enhancer_GeneID:112577504	NC_000001.11	15788449	15801596	dbSUPER_Skeletal_Muscle_Myoblast_SE_52322	295	295	13147	1	0.0224386
NC_000001.11	15800233	15800528	RefSeqFE_enhancer_GeneID:112577504	NC_000001.11	15793716	15801429	dbSUPER_HUVEC_SE_38801	295	295	7713	1	0.0382471
NC_000001.11	15893297	15893442	RefSeqFE_enhancer_GeneID:111562380	NC_000001.11	15893198	15893539	ENCODEcCRE_EH38E1321965_distal_enhancer	145	145	341	1	0.42522
NC_000001.11	15893297	15893442	RefSeqFE_enhancer_GeneID:111562380	NC_000001.11	15882586	15967129	dbSUPER_Osteoblasts_SE_45986	145	145	84543	1	0.0017151
NC_000001.11	15893297	15893442	RefSeqFE_enhancer_GeneID:111562380	NC_000001.11	15890200	15894600	Ensembl104_promoter_flanking_region:ENSR00000348408	145	145	4400	1	0.0329545
NC_000001.11	15893364	15893375	RefSeqFE_transcriptional_cis_regulatory_region_GeneID:111562380	NC_000001.11	15893198	15893539	ENCODEcCRE_EH38E1321965_distal_enhancer	11	11	341	1	0.0322581
NC_000001.11	15893364	15893375	RefSeqFE_transcriptional_cis_regulatory_region_GeneID:111562380	NC_000001.11	15882586	15967129	dbSUPER_Osteoblasts_SE_45986	11	11	84543	1	0.000130111
NC_000001.11	15893364	15893375	RefSeqFE_transcriptional_cis_regulatory_region_GeneID:111562380	NC_000001.11	15890200	15894600	Ensembl104_promoter_flanking_region:ENSR00000348408	11	11	4400	1	0.0025
NC_000001.11	16044592	16045557	RefSeqFE_non_allelic_homologous_recombination_region_GeneID:106501713	NC_000001.11	16044217	16045000	Ensembl104_promoter_flanking_region:ENSR00001165904	408	965	783	0.422798	0.521073
NC_000001.11	16051375	16054065	RefSeqFE_meiotic_recombination_region_GeneID:106501713	NC_000001.11	16053836	16054687	Ensembl104_TF_binding_site:ENSR00000920235	229	2690	851	0.0851301	0.269095
NC_000001.11	16052513	16054065	RefSeqFE_meiotic_recombination_region_GeneID:106501713	NC_000001.11	16053836	16054687	Ensembl104_TF_binding_site:ENSR00000920235	229	1552	851	0.147552	0.269095
NC_000001.11	16057308	16059459	RefSeqFE_non_allelic_homologous_recombination_region_GeneID:106501713	NC_000001.11	16057400	16057600	Ensembl104_enhancer:ENSR00000920237	200	2151	200	0.09298	1
NC_000001.11	16057308	16059459	RefSeqFE_non_allelic_homologous_recombination_region_GeneID:106501713	NC_000001.11	16058800	16059200	Ensembl104_CTCF_binding_site:ENSR00000348473	400	2151	400	0.18596	1
NC_000001.11	16057308	16059459	RefSeqFE_non_allelic_homologous_recombination_region_GeneID:106501713	NC_000001.11	16058848	16059170	Ensembl104_open_chromatin_region:ENSR00000920238	322	2151	322	0.149698	1
NC_000001.11	16162433	16162728	RefSeqFE_enhancer_GeneID:112577505	NC_000001.11	16162439	16162614	ENCODEcCRE_EH38E1322236_distal_enhancer	175	295	175	0.59322	1
NC_000001.11	16162433	16162728	RefSeqFE_enhancer_GeneID:112577505	NC_000001.11	16162526	16162712	FANTOM5_enhancer_chr1:16162526-16162712	186	295	186	0.630508	1
NC_000001.11	16162433	16162728	RefSeqFE_enhancer_GeneID:112577505	NC_000001.11	16122313	16189698	dbSUPER_HCT-116_SE_34268	295	295	67385	1	0.00437783
NC_000001.11	16162433	16162728	RefSeqFE_enhancer_GeneID:112577505	NC_000001.11	16126200	16182984	dbSUPER_Left_Ventricle_SE_40833	295	295	56784	1	0.00519513
NC_000001.11	16162433	16162728	RefSeqFE_enhancer_GeneID:112577505	NC_000001.11	16127732	16183032	dbSUPER_Right_Atrium_SE_48744	295	295	55300	1	0.00533454
NC_000001.11	16162433	16162728	RefSeqFE_enhancer_GeneID:112577505	NC_000001.11	16137585	16190519	dbSUPER_VACO_503_SE_57357	295	295	52934	1	0.00557298
NC_000001.11	16162433	16162728	RefSeqFE_enhancer_GeneID:112577505	NC_000001.11	16137769	16227389	dbSUPER_Colon_Crypt_3_SE_24743	295	295	89620	1	0.00329168
NC_000001.11	16162433	16162728	RefSeqFE_enhancer_GeneID:112577505	NC_000001.11	16137894	16190573	dbSUPER_HeLa_SE_34628	295	295	52679	1	0.00559995
NC_000001.11	16162433	16162728	RefSeqFE_enhancer_GeneID:112577505	NC_000001.11	16138079	16183379	dbSUPER_HUVEC_SE_38062	295	295	45300	1	0.00651214
NC_000001.11	16162433	16162728	RefSeqFE_enhancer_GeneID:112577505	NC_000001.11	16138410	16189792	dbSUPER_Small_Intestine_SE_52536	295	295	51382	1	0.00574131
NC_000001.11	16162433	16162728	RefSeqFE_enhancer_GeneID:112577505	NC_000001.11	16138558	16220391	dbSUPER_Colon_Crypt_1_SE_23091	295	295	81833	1	0.0036049
NC_000001.11	16162433	16162728	RefSeqFE_enhancer_GeneID:112577505	NC_000001.11	16138651	16190584	dbSUPER_Pancreatic_islets_SE_65472	295	295	51933	1	0.0056804
NC_000001.11	16162433	16162728	RefSeqFE_enhancer_GeneID:112577505	NC_000001.11	16138788	16182954	dbSUPER_NHLF_SE_44998	295	295	44166	1	0.00667935
NC_000001.11	16162433	16162728	RefSeqFE_enhancer_GeneID:112577505	NC_000001.11	16138837	16189666	dbSUPER_HMEC_SE_36144	295	295	50829	1	0.00580377
NC_000001.11	16162433	16162728	RefSeqFE_enhancer_GeneID:112577505	NC_000001.11	16138962	16227354	dbSUPER_Colon_Crypt_2_SE_23751	295	295	88392	1	0.00333741
NC_000001.11	16162433	16162728	RefSeqFE_enhancer_GeneID:112577505	NC_000001.11	16141047	16189310	dbSUPER_NHEK_SE_64726	295	295	48263	1	0.00611234
NC_000001.11	16162433	16162728	RefSeqFE_enhancer_GeneID:112577505	NC_000001.11	16141097	16187912	dbSUPER_VACO_400_SE_56795	295	295	46815	1	0.0063014
NC_000001.11	16162433	16162728	RefSeqFE_enhancer_GeneID:112577505	NC_000001.11	16141296	16189568	dbSUPER_Fetal_Intestine_Large_SE_29455	295	295	48272	1	0.0061112
NC_000001.11	16162433	16162728	RefSeqFE_enhancer_GeneID:112577505	NC_000001.11	16142581	16182823	dbSUPER_VACO_9m_SE_57939	295	295	40242	1	0.00733065
NC_000001.11	16162433	16162728	RefSeqFE_enhancer_GeneID:112577505	NC_000001.11	16142998	16189786	dbSUPER_Sigmoid_Colon_SE_50427	295	295	46788	1	0.00630504
NC_000001.11	16162433	16162728	RefSeqFE_enhancer_GeneID:112577505	NC_000001.11	16143020	16189689	dbSUPER_Fetal_Intestine_SE_28102	295	295	46669	1	0.00632111
NC_000001.11	16162433	16162728	RefSeqFE_enhancer_GeneID:112577505	NC_000001.11	16143217	16182664	dbSUPER_Pancreas_SE_47539	295	295	39447	1	0.00747839
NC_000001.11	16162433	16162728	RefSeqFE_enhancer_GeneID:112577505	NC_000001.11	16109360	16192567	dbSUPER_Esophagus_SE_26540	295	295	83207	1	0.00354537
NC_000001.11	16162433	16162728	RefSeqFE_enhancer_GeneID:112577505	NC_000001.11	16111246	16207828	dbSUPER_Osteoblasts_SE_46140	295	295	96582	1	0.0030544
NC_000001.11	16162433	16162728	RefSeqFE_enhancer_GeneID:112577505	NC_000001.11	16120123	16189579	dbSUPER_Gastric_SE_31527	295	295	69456	1	0.00424729
NC_000001.11	16162433	16162728	RefSeqFE_enhancer_GeneID:112577505	NC_000001.11	16121163	16188733	dbSUPER_Panc1_SE_47150	295	295	67570	1	0.00436584
NC_000001.11	18630529	18631315	RefSeqFE_promoter_GeneID:108254694	NC_000001.11	18630286	18630566	ENCODEcCRE_EH38E1323936_proximal_enhancer	37	786	280	0.0470738	0.132143
NC_000001.11	18630529	18631315	RefSeqFE_promoter_GeneID:108254694	NC_000001.11	18630735	18631075	ENCODEcCRE_EH38E1323937_promoter	340	786	340	0.43257	1
NC_000001.11	18630529	18631315	RefSeqFE_promoter_GeneID:108254694	NC_000001.11	18630799	18632001	Ensembl104_promoter:ENSR00000349249	516	786	1202	0.656489	0.429285
NC_000001.11	18630529	18631315	RefSeqFE_promoter_GeneID:108254694	NC_000001.11	18631255	18631568	ENCODEcCRE_EH38E1323938_promoter	60	786	313	0.0763359	0.191693
NC_000001.11	18630529	18631315	RefSeqFE_promoter_GeneID:108254694	NC_000001.11	18630569	18646922	dbSUPER_Fetal_Muscle_SE_30763	746	786	16353	0.949109	0.0456185
NC_000001.11	18630718	18631629	RefSeqFE_promoter_GeneID:108254694	NC_000001.11	18630735	18631075	ENCODEcCRE_EH38E1323937_promoter	340	911	340	0.373216	1
NC_000001.11	18630718	18631629	RefSeqFE_promoter_GeneID:108254694	NC_000001.11	18630799	18632001	Ensembl104_promoter:ENSR00000349249	830	911	1202	0.911087	0.690516
NC_000001.11	18630718	18631629	RefSeqFE_promoter_GeneID:108254694	NC_000001.11	18631255	18631568	ENCODEcCRE_EH38E1323938_promoter	313	911	313	0.343578	1
NC_000001.11	18630718	18631629	RefSeqFE_promoter_GeneID:108254694	NC_000001.11	18631591	18631846	ENCODEcCRE_EH38E1323939_promoter	38	911	255	0.0417124	0.14902
NC_000001.11	18630718	18631629	RefSeqFE_promoter_GeneID:108254694	NC_000001.11	18630569	18646922	dbSUPER_Fetal_Muscle_SE_30763	911	911	16353	1	0.0557084
NC_000001.11	18631352	18631629	RefSeqFE_promoter_GeneID:108254694	NC_000001.11	18630799	18632001	Ensembl104_promoter:ENSR00000349249	277	277	1202	1	0.230449
NC_000001.11	18631352	18631629	RefSeqFE_promoter_GeneID:108254694	NC_000001.11	18631255	18631568	ENCODEcCRE_EH38E1323938_promoter	216	277	313	0.779783	0.690096
NC_000001.11	18631352	18631629	RefSeqFE_promoter_GeneID:108254694	NC_000001.11	18631591	18631846	ENCODEcCRE_EH38E1323939_promoter	38	277	255	0.137184	0.14902
NC_000001.11	18631352	18631629	RefSeqFE_promoter_GeneID:108254694	NC_000001.11	18630569	18646922	dbSUPER_Fetal_Muscle_SE_30763	277	277	16353	1	0.0169388
NC_000001.11	18632168	18633682	RefSeqFE_enhancer_GeneID:108175348	NC_000001.11	18632176	18633790	VISTA_enhancer_positive_hs1702	1506	1514	1614	0.994716	0.933086
NC_000001.11	18632168	18633682	RefSeqFE_enhancer_GeneID:108175348	NC_000001.11	18632264	18632588	ENCODEcCRE_EH38E1323941_proximal_enhancer	324	1514	324	0.214003	1
NC_000001.11	18632168	18633682	RefSeqFE_enhancer_GeneID:108175348	NC_000001.11	18632619	18634037	Ensembl104_open_chromatin_region:ENSR00000920579	1063	1514	1418	0.702114	0.749647
NC_000001.11	18632168	18633682	RefSeqFE_enhancer_GeneID:108175348	NC_000001.11	18632819	18633166	ENCODEcCRE_EH38E1323942_proximal_enhancer	347	1514	347	0.229194	1
NC_000001.11	18632168	18633682	RefSeqFE_enhancer_GeneID:108175348	NC_000001.11	18633269	18633536	ENCODEcCRE_EH38E1323943_proximal_enhancer	267	1514	267	0.176354	1
NC_000001.11	18632168	18633682	RefSeqFE_enhancer_GeneID:108175348	NC_000001.11	18630569	18646922	dbSUPER_Fetal_Muscle_SE_30763	1514	1514	16353	1	0.0925824
NC_000001.11	18632176	18633790	RefSeqFE_enhancer_GeneID:108175348	NC_000001.11	18632176	18633790	VISTA_enhancer_positive_hs1702	1614	1614	1614	1	1
NC_000001.11	18632176	18633790	RefSeqFE_enhancer_GeneID:108175348	NC_000001.11	18632264	18632588	ENCODEcCRE_EH38E1323941_proximal_enhancer	324	1614	324	0.200743	1
NC_000001.11	18632176	18633790	RefSeqFE_enhancer_GeneID:108175348	NC_000001.11	18632619	18634037	Ensembl104_open_chromatin_region:ENSR00000920579	1171	1614	1418	0.725527	0.825811
NC_000001.11	18632176	18633790	RefSeqFE_enhancer_GeneID:108175348	NC_000001.11	18632819	18633166	ENCODEcCRE_EH38E1323942_proximal_enhancer	347	1614	347	0.214994	1
NC_000001.11	18632176	18633790	RefSeqFE_enhancer_GeneID:108175348	NC_000001.11	18633269	18633536	ENCODEcCRE_EH38E1323943_proximal_enhancer	267	1614	267	0.165428	1
NC_000001.11	18632176	18633790	RefSeqFE_enhancer_GeneID:108175348	NC_000001.11	18630569	18646922	dbSUPER_Fetal_Muscle_SE_30763	1614	1614	16353	1	0.0986975
NC_000001.11	18632688	18632929	RefSeqFE_conserved_region_GeneID:108175348	NC_000001.11	18632176	18633790	VISTA_enhancer_positive_hs1702	241	241	1614	1	0.149318
NC_000001.11	18632688	18632929	RefSeqFE_conserved_region_GeneID:108175348	NC_000001.11	18632619	18634037	Ensembl104_open_chromatin_region:ENSR00000920579	241	241	1418	1	0.169958
NC_000001.11	18632688	18632929	RefSeqFE_conserved_region_GeneID:108175348	NC_000001.11	18632819	18633166	ENCODEcCRE_EH38E1323942_proximal_enhancer	110	241	347	0.456432	0.317003
NC_000001.11	18632688	18632929	RefSeqFE_conserved_region_GeneID:108175348	NC_000001.11	18630569	18646922	dbSUPER_Fetal_Muscle_SE_30763	241	241	16353	1	0.0147374
NC_000001.11	18632856	18633060	RefSeqFE_conserved_region_GeneID:108175348	NC_000001.11	18632176	18633790	VISTA_enhancer_positive_hs1702	204	204	1614	1	0.126394
NC_000001.11	18632856	18633060	RefSeqFE_conserved_region_GeneID:108175348	NC_000001.11	18632619	18634037	Ensembl104_open_chromatin_region:ENSR00000920579	204	204	1418	1	0.143865
NC_000001.11	18632856	18633060	RefSeqFE_conserved_region_GeneID:108175348	NC_000001.11	18632819	18633166	ENCODEcCRE_EH38E1323942_proximal_enhancer	204	204	347	1	0.587896
NC_000001.11	18632856	18633060	RefSeqFE_conserved_region_GeneID:108175348	NC_000001.11	18630569	18646922	dbSUPER_Fetal_Muscle_SE_30763	204	204	16353	1	0.0124748
NC_000001.11	18941274	18941569	RefSeqFE_enhancer_GeneID:111828503	NC_000001.11	18940242	18955489	dbSUPER_Brain_Angular_Gyrus_SE_03730	295	295	15247	1	0.0193481
NC_000001.11	18941274	18941569	RefSeqFE_enhancer_GeneID:111828503	NC_000001.11	18941266	18941613	ENCODEcCRE_EH38E1324154_distal_enhancer	295	295	347	1	0.850144
NC_000001.11	18941274	18941569	RefSeqFE_enhancer_GeneID:111828503	NC_000001.11	18894352	18957476	dbSUPER_Spleen_SE_53460	295	295	63124	1	0.00467334
NC_000001.11	18941274	18941569	RefSeqFE_enhancer_GeneID:111828503	NC_000001.11	18899310	18963384	dbSUPER_Esophagus_SE_26830	295	295	64074	1	0.00460405
NC_000001.11	18941274	18941569	RefSeqFE_enhancer_GeneID:111828503	NC_000001.11	18901323	18955929	dbSUPER_Panc1_SE_47330	295	295	54606	1	0.00540234
NC_000001.11	18941274	18941569	RefSeqFE_enhancer_GeneID:111828503	NC_000001.11	18906468	18957662	dbSUPER_HUVEC_SE_38219	295	295	51194	1	0.00576239
NC_000001.11	18941274	18941569	RefSeqFE_enhancer_GeneID:111828503	NC_000001.11	18906503	18958252	dbSUPER_Brain_Hippocampus_Middle_SE_05988	295	295	51749	1	0.00570059
NC_000001.11	18941274	18941569	RefSeqFE_enhancer_GeneID:111828503	NC_000001.11	18906601	18957634	dbSUPER_CD4p_CD25-_Il17p_PMAstim_Th17_SE_19155	295	295	51033	1	0.00578057
NC_000001.11	18941274	18941569	RefSeqFE_enhancer_GeneID:111828503	NC_000001.11	18906693	18957362	dbSUPER_Lung_SE_42513	295	295	50669	1	0.0058221
NC_000001.11	18941274	18941569	RefSeqFE_enhancer_GeneID:111828503	NC_000001.11	18906871	18956041	dbSUPER_Brain_Inferior_Temporal_Lobe_SE_08107	295	295	49170	1	0.00599959
NC_000001.11	18941274	18941569	RefSeqFE_enhancer_GeneID:111828503	NC_000001.11	18906935	18963236	dbSUPER_Pancreatic_islets_SE_65885	295	295	56301	1	0.00523969
NC_000001.11	18941274	18941569	RefSeqFE_enhancer_GeneID:111828503	NC_000001.11	18907139	18955162	dbSUPER_Adrenal_Gland_SE_01018	295	295	48023	1	0.00614289
NC_000001.11	18941274	18941569	RefSeqFE_enhancer_GeneID:111828503	NC_000001.11	18907198	18965849	dbSUPER_Pancreas_SE_47564	295	295	58651	1	0.00502975
NC_000001.11	18941274	18941569	RefSeqFE_enhancer_GeneID:111828503	NC_000001.11	18907294	18956254	dbSUPER_CD4p_CD25-_Il17-_PMAstim_Th_SE_18508	295	295	48960	1	0.00602533
NC_000001.11	18941274	18941569	RefSeqFE_enhancer_GeneID:111828503	NC_000001.11	18912500	18958019	dbSUPER_CD4p_CD25-_CD45ROp_Memory_SE_17874	295	295	45519	1	0.00648081
NC_000001.11	18941274	18941569	RefSeqFE_enhancer_GeneID:111828503	NC_000001.11	18921374	18956686	dbSUPER_HMEC_SE_35893	295	295	35312	1	0.0083541
NC_000001.11	18941274	18941569	RefSeqFE_enhancer_GeneID:111828503	NC_000001.11	18921507	18952342	dbSUPER_Fetal_Muscle_SE_30281	295	295	30835	1	0.00956705
NC_000001.11	18941274	18941569	RefSeqFE_enhancer_GeneID:111828503	NC_000001.11	18921565	18950776	dbSUPER_H2171_SE_33643	295	295	29211	1	0.0100989
NC_000001.11	18941274	18941569	RefSeqFE_enhancer_GeneID:111828503	NC_000001.11	18921651	18955843	dbSUPER_NHEK_SE_64648	295	295	34192	1	0.00862775
NC_000001.11	18941274	18941569	RefSeqFE_enhancer_GeneID:111828503	NC_000001.11	18921885	18950687	dbSUPER_Brain_Mid_Frontal_Lobe_SE_08947	295	295	28802	1	0.0102423
NC_000001.11	18941274	18941569	RefSeqFE_enhancer_GeneID:111828503	NC_000001.11	18923127	18956615	dbSUPER_CD4_Memory_Primary_7pool_SE_14542	295	295	33488	1	0.00880913
NC_000001.11	18941274	18941569	RefSeqFE_enhancer_GeneID:111828503	NC_000001.11	18926124	18955849	dbSUPER_CD3_SE_12029	295	295	29725	1	0.00992431
NC_000001.11	18941274	18941569	RefSeqFE_enhancer_GeneID:111828503	NC_000001.11	18937805	18956226	dbSUPER_Brain_Cingulate_Gyrus_SE_05621	295	295	18421	1	0.0160143
NC_000001.11	18941274	18941569	RefSeqFE_enhancer_GeneID:111828503	NC_000001.11	18937978	18966680	dbSUPER_HSMMtube_SE_37377	295	295	28702	1	0.010278
NC_000001.11	18941274	18941569	RefSeqFE_enhancer_GeneID:111828503	NC_000001.11	18938078	18955931	dbSUPER_Brain_Anterior_Caudate_SE_04479	295	295	17853	1	0.0165238
NC_000001.11	18941274	18941569	RefSeqFE_enhancer_GeneID:111828503	NC_000001.11	18938162	18957731	dbSUPER_Brain_Hippocampus_Middle_150_SE_07595	295	295	19569	1	0.0150749
NC_000001.11	18941294	18941589	RefSeqFE_enhancer_GeneID:111828503	NC_000001.11	18940242	18955489	dbSUPER_Brain_Angular_Gyrus_SE_03730	295	295	15247	1	0.0193481
NC_000001.11	18941294	18941589	RefSeqFE_enhancer_GeneID:111828503	NC_000001.11	18941266	18941613	ENCODEcCRE_EH38E1324154_distal_enhancer	295	295	347	1	0.850144
NC_000001.11	18941294	18941589	RefSeqFE_enhancer_GeneID:111828503	NC_000001.11	18894352	18957476	dbSUPER_Spleen_SE_53460	295	295	63124	1	0.00467334
NC_000001.11	18941294	18941589	RefSeqFE_enhancer_GeneID:111828503	NC_000001.11	18899310	18963384	dbSUPER_Esophagus_SE_26830	295	295	64074	1	0.00460405
NC_000001.11	18941294	18941589	RefSeqFE_enhancer_GeneID:111828503	NC_000001.11	18901323	18955929	dbSUPER_Panc1_SE_47330	295	295	54606	1	0.00540234
NC_000001.11	18941294	18941589	RefSeqFE_enhancer_GeneID:111828503	NC_000001.11	18906468	18957662	dbSUPER_HUVEC_SE_38219	295	295	51194	1	0.00576239
NC_000001.11	18941294	18941589	RefSeqFE_enhancer_GeneID:111828503	NC_000001.11	18906503	18958252	dbSUPER_Brain_Hippocampus_Middle_SE_05988	295	295	51749	1	0.00570059
NC_000001.11	18941294	18941589	RefSeqFE_enhancer_GeneID:111828503	NC_000001.11	18906601	18957634	dbSUPER_CD4p_CD25-_Il17p_PMAstim_Th17_SE_19155	295	295	51033	1	0.00578057
NC_000001.11	18941294	18941589	RefSeqFE_enhancer_GeneID:111828503	NC_000001.11	18906693	18957362	dbSUPER_Lung_SE_42513	295	295	50669	1	0.0058221
NC_000001.11	18941294	18941589	RefSeqFE_enhancer_GeneID:111828503	NC_000001.11	18906871	18956041	dbSUPER_Brain_Inferior_Temporal_Lobe_SE_08107	295	295	49170	1	0.00599959
NC_000001.11	18941294	18941589	RefSeqFE_enhancer_GeneID:111828503	NC_000001.11	18906935	18963236	dbSUPER_Pancreatic_islets_SE_65885	295	295	56301	1	0.00523969
NC_000001.11	18941294	18941589	RefSeqFE_enhancer_GeneID:111828503	NC_000001.11	18907139	18955162	dbSUPER_Adrenal_Gland_SE_01018	295	295	48023	1	0.00614289
NC_000001.11	18941294	18941589	RefSeqFE_enhancer_GeneID:111828503	NC_000001.11	18907198	18965849	dbSUPER_Pancreas_SE_47564	295	295	58651	1	0.00502975
NC_000001.11	18941294	18941589	RefSeqFE_enhancer_GeneID:111828503	NC_000001.11	18907294	18956254	dbSUPER_CD4p_CD25-_Il17-_PMAstim_Th_SE_18508	295	295	48960	1	0.00602533
NC_000001.11	18941294	18941589	RefSeqFE_enhancer_GeneID:111828503	NC_000001.11	18912500	18958019	dbSUPER_CD4p_CD25-_CD45ROp_Memory_SE_17874	295	295	45519	1	0.00648081
NC_000001.11	18941294	18941589	RefSeqFE_enhancer_GeneID:111828503	NC_000001.11	18921374	18956686	dbSUPER_HMEC_SE_35893	295	295	35312	1	0.0083541
NC_000001.11	18941294	18941589	RefSeqFE_enhancer_GeneID:111828503	NC_000001.11	18921507	18952342	dbSUPER_Fetal_Muscle_SE_30281	295	295	30835	1	0.00956705
NC_000001.11	18941294	18941589	RefSeqFE_enhancer_GeneID:111828503	NC_000001.11	18921565	18950776	dbSUPER_H2171_SE_33643	295	295	29211	1	0.0100989
NC_000001.11	18941294	18941589	RefSeqFE_enhancer_GeneID:111828503	NC_000001.11	18921651	18955843	dbSUPER_NHEK_SE_64648	295	295	34192	1	0.00862775
NC_000001.11	18941294	18941589	RefSeqFE_enhancer_GeneID:111828503	NC_000001.11	18921885	18950687	dbSUPER_Brain_Mid_Frontal_Lobe_SE_08947	295	295	28802	1	0.0102423
NC_000001.11	18941294	18941589	RefSeqFE_enhancer_GeneID:111828503	NC_000001.11	18923127	18956615	dbSUPER_CD4_Memory_Primary_7pool_SE_14542	295	295	33488	1	0.00880913
NC_000001.11	18941294	18941589	RefSeqFE_enhancer_GeneID:111828503	NC_000001.11	18926124	18955849	dbSUPER_CD3_SE_12029	295	295	29725	1	0.00992431
NC_000001.11	18941294	18941589	RefSeqFE_enhancer_GeneID:111828503	NC_000001.11	18937805	18956226	dbSUPER_Brain_Cingulate_Gyrus_SE_05621	295	295	18421	1	0.0160143
NC_000001.11	18941294	18941589	RefSeqFE_enhancer_GeneID:111828503	NC_000001.11	18937978	18966680	dbSUPER_HSMMtube_SE_37377	295	295	28702	1	0.010278
NC_000001.11	18941294	18941589	RefSeqFE_enhancer_GeneID:111828503	NC_000001.11	18938078	18955931	dbSUPER_Brain_Anterior_Caudate_SE_04479	295	295	17853	1	0.0165238
NC_000001.11	18941294	18941589	RefSeqFE_enhancer_GeneID:111828503	NC_000001.11	18938162	18957731	dbSUPER_Brain_Hippocampus_Middle_150_SE_07595	295	295	19569	1	0.0150749
NC_000001.11	21022399	21022544	RefSeqFE_enhancer_GeneID:111501793	NC_000001.11	21022317	21022667	ENCODEcCRE_EH38E1325786_distal_enhancer	145	145	350	1	0.414286
NC_000001.11	21022466	21022477	RefSeqFE_transcriptional_cis_regulatory_region_GeneID:111501793	NC_000001.11	21022317	21022667	ENCODEcCRE_EH38E1325786_distal_enhancer	11	11	350	1	0.0314286
NC_000001.11	22611455	22611750	RefSeqFE_silencer_GeneID:113939986	NC_000001.11	22611458	22611900	Ensembl104_TF_binding_site:ENSR00000002916	292	295	442	0.989831	0.660633
NC_000001.11	22611455	22611750	RefSeqFE_silencer_GeneID:113939986	NC_000001.11	22610223	22630256	dbSUPER_H2171_SE_33731	295	295	20033	1	0.0147257
NC_000001.11	23356778	23357008	RefSeqFE_enhancer_blocking_element_GeneID:111721714	NC_000001.11	23356400	23357999	Ensembl104_promoter_flanking_region:ENSR00000350557	230	230	1599	1	0.14384
NC_000001.11	23356833	23356967	RefSeqFE_mobile_genetic_element_GeneID:111721714	NC_000001.11	23356400	23357999	Ensembl104_promoter_flanking_region:ENSR00000350557	134	134	1599	1	0.0838024
NC_000001.11	23544737	23545032	RefSeqFE_enhancer_GeneID:112577550	NC_000001.11	23544200	23545400	Ensembl104_CTCF_binding_site:ENSR00000250731	295	295	1200	1	0.245833
NC_000001.11	23544737	23545032	RefSeqFE_enhancer_GeneID:112577550	NC_000001.11	23544401	23545799	Ensembl104_promoter_flanking_region:ENSR00000350618	295	295	1398	1	0.211016
NC_000001.11	23544737	23545032	RefSeqFE_enhancer_GeneID:112577550	NC_000001.11	23544745	23545085	ENCODEcCRE_EH38E1327896_distal_enhancer	287	295	340	0.972881	0.844118
NC_000001.11	23544737	23545032	RefSeqFE_enhancer_GeneID:112577550	NC_000001.11	23523456	23568746	dbSUPER_Colon_Crypt_2_SE_23782	295	295	45290	1	0.00651358
NC_000001.11	23544737	23545032	RefSeqFE_enhancer_GeneID:112577550	NC_000001.11	23523844	23578131	dbSUPER_Fetal_Intestine_SE_27884	295	295	54287	1	0.00543408
NC_000001.11	23544737	23545032	RefSeqFE_enhancer_GeneID:112577550	NC_000001.11	23523976	23578323	dbSUPER_Fetal_Intestine_Large_SE_28880	295	295	54347	1	0.00542808
NC_000001.11	23544737	23545032	RefSeqFE_enhancer_GeneID:112577550	NC_000001.11	23544126	23582057	dbSUPER_Brain_Inferior_Temporal_Lobe_SE_08579	295	295	37931	1	0.00777728
NC_000001.11	23544737	23545032	RefSeqFE_enhancer_GeneID:112577550	NC_000001.11	23544403	23582319	dbSUPER_Brain_Hippocampus_Middle_SE_06239	295	295	37916	1	0.00778036
NC_000001.11	23544737	23545032	RefSeqFE_enhancer_GeneID:112577550	NC_000001.11	23544523	23582054	dbSUPER_Brain_Cingulate_Gyrus_SE_05716	295	295	37531	1	0.00786017
NC_000001.11	23544737	23545032	RefSeqFE_enhancer_GeneID:112577550	NC_000001.11	23523329	23621301	dbSUPER_Sigmoid_Colon_SE_50077	295	295	97972	1	0.00301106
NC_000001.11	23544737	23545032	RefSeqFE_enhancer_GeneID:112577550	NC_000001.11	23524627	23594507	dbSUPER_HeLa_SE_34689	295	295	69880	1	0.00422152
NC_000001.11	24365218	24365513	RefSeqFE_enhancer_GeneID:112577563	NC_000001.11	24365236	24365584	ENCODEcCRE_EH38E1328623_distal_enhancer	277	295	348	0.938983	0.795977
NC_000001.11	24365218	24365513	RefSeqFE_enhancer_GeneID:112577563	NC_000001.11	24365343	24365592	FANTOM5_enhancer_chr1:24365343-24365592	170	295	249	0.576271	0.682731
NC_000001.11	24365218	24365513	RefSeqFE_enhancer_GeneID:112577563	NC_000001.11	24362601	24366399	Ensembl104_promoter_flanking_region:ENSR00000350853	295	295	3798	1	0.0776725
NC_000001.11	24365218	24365513	RefSeqFE_enhancer_GeneID:112577563	NC_000001.11	24350005	24393590	dbSUPER_Esophagus_SE_26747	295	295	43585	1	0.00676838
NC_000001.11	24541058	24541353	RefSeqFE_enhancer_GeneID:112577564	NC_000001.11	24541066	24541294	ENCODEcCRE_EH38E1328768_distal_enhancer	228	295	228	0.772881	1
NC_000001.11	24541058	24541353	RefSeqFE_enhancer_GeneID:112577564	NC_000001.11	24535650	24569233	dbSUPER_Fetal_Intestine_SE_28444	295	295	33583	1	0.00878421
NC_000001.11	24541058	24541353	RefSeqFE_enhancer_GeneID:112577564	NC_000001.11	24535703	24569448	dbSUPER_Fetal_Intestine_Large_SE_29333	295	295	33745	1	0.00874204
NC_000001.11	24541058	24541353	RefSeqFE_enhancer_GeneID:112577564	NC_000001.11	24459383	24542118	dbSUPER_CD4p_CD25-_Il17-_PMAstim_Th_SE_18454	295	295	82735	1	0.0035656
NC_000001.11	24541058	24541353	RefSeqFE_enhancer_GeneID:112577564	NC_000001.11	24463115	24541960	dbSUPER_CD4p_CD25-_CD45RAp_Naive_SE_17366	295	295	78845	1	0.00374152
NC_000001.11	24720117	24720412	RefSeqFE_enhancer_GeneID:112577570	NC_000001.11	24717801	24721799	Ensembl104_promoter_flanking_region:ENSR00001166580	295	295	3998	1	0.0737869
NC_000001.11	24720117	24720412	RefSeqFE_enhancer_GeneID:112577570	NC_000001.11	24720135	24720484	ENCODEcCRE_EH38E1328911_distal_enhancer	277	295	349	0.938983	0.793696
NC_000001.11	24720117	24720412	RefSeqFE_enhancer_GeneID:112577570	NC_000001.11	24668947	24749060	dbSUPER_HSMMtube_SE_37045	295	295	80113	1	0.0036823
NC_000001.11	24720117	24720412	RefSeqFE_enhancer_GeneID:112577570	NC_000001.11	24682402	24771455	dbSUPER_Left_Ventricle_SE_41323	295	295	89053	1	0.00331263
NC_000001.11	24720117	24720412	RefSeqFE_enhancer_GeneID:112577570	NC_000001.11	24701965	24727946	dbSUPER_HSMM_SE_63833	295	295	25981	1	0.0113545
NC_000001.11	24720117	24720412	RefSeqFE_enhancer_GeneID:112577570	NC_000001.11	24702057	24725867	dbSUPER_Skeletal_Muscle_Myoblast_SE_52042	295	295	23810	1	0.0123898
NC_000001.11	24720117	24720412	RefSeqFE_enhancer_GeneID:112577570	NC_000001.11	24704092	24747649	dbSUPER_Brain_Hippocampus_Middle_SE_06312	295	295	43557	1	0.00677273
NC_000001.11	24720117	24720412	RefSeqFE_enhancer_GeneID:112577570	NC_000001.11	24704105	24748946	dbSUPER_Brain_Hippocampus_Middle_150_SE_07165	295	295	44841	1	0.0065788
NC_000001.11	24720117	24720412	RefSeqFE_enhancer_GeneID:112577570	NC_000001.11	24704196	24747413	dbSUPER_Brain_Cingulate_Gyrus_SE_05379	295	295	43217	1	0.00682602
NC_000001.11	24720117	24720412	RefSeqFE_enhancer_GeneID:112577570	NC_000001.11	24704239	24744632	dbSUPER_Brain_Anterior_Caudate_SE_04517	295	295	40393	1	0.00730325
NC_000001.11	24720117	24720412	RefSeqFE_enhancer_GeneID:112577570	NC_000001.11	24704316	24754954	dbSUPER_u87_SE_56631	295	295	50638	1	0.00582566
NC_000001.11	24720117	24720412	RefSeqFE_enhancer_GeneID:112577570	NC_000001.11	24704342	24744478	dbSUPER_Brain_Angular_Gyrus_SE_03668	295	295	40136	1	0.00735001
NC_000001.11	24720117	24720412	RefSeqFE_enhancer_GeneID:112577570	NC_000001.11	24704762	24747509	dbSUPER_Brain_Inferior_Temporal_Lobe_SE_08484	295	295	42747	1	0.00690107
NC_000001.11	25022138	25023701	RefSeqFE_enhancer_GeneID:109851610	NC_000001.11	25021999	25023601	Ensembl104_promoter:ENSR00001166611	1463	1563	1602	0.93602	0.913233
NC_000001.11	25022138	25023701	RefSeqFE_enhancer_GeneID:109851610	NC_000001.11	25022064	25022242	ENCODEcCRE_EH38E1329228_proximal_enhancer	104	1563	178	0.0665387	0.58427
NC_000001.11	25022138	25023701	RefSeqFE_enhancer_GeneID:109851610	NC_000001.11	25022168	25022854	FANTOM5_enhancer_chr1:25022168-25022854	686	1563	686	0.4389	1
NC_000001.11	25022138	25023701	RefSeqFE_enhancer_GeneID:109851610	NC_000001.11	25022354	25022704	ENCODEcCRE_EH38E1329229_proximal_enhancer	350	1563	350	0.223928	1
NC_000001.11	25022138	25023701	RefSeqFE_enhancer_GeneID:109851610	NC_000001.11	25022826	25023175	ENCODEcCRE_EH38E1329230_proximal_enhancer	349	1563	349	0.223289	1
NC_000001.11	25022138	25023701	RefSeqFE_enhancer_GeneID:109851610	NC_000001.11	25023248	25023510	ENCODEcCRE_EH38E1329231_promoter	262	1563	262	0.167626	1
NC_000001.11	25022138	25023701	RefSeqFE_enhancer_GeneID:109851610	NC_000001.11	25006112	25038175	dbSUPER_Ly4_SE_59636	1563	1563	32063	1	0.0487478
NC_000001.11	25022138	25023701	RefSeqFE_enhancer_GeneID:109851610	NC_000001.11	25017265	25034889	dbSUPER_CD4p_CD25-_Il17p_PMAstim_Th17_SE_19667	1563	1563	17624	1	0.0886859
NC_000001.11	25022138	25023701	RefSeqFE_enhancer_GeneID:109851610	NC_000001.11	25017366	25038206	dbSUPER_Tonsil_SE_62783	1563	1563	20840	1	0.075
NC_000001.11	25022138	25023701	RefSeqFE_enhancer_GeneID:109851610	NC_000001.11	25018613	25037741	dbSUPER_GM12878_SE_32553	1563	1563	19128	1	0.0817127
NC_000001.11	25022138	25023701	RefSeqFE_enhancer_GeneID:109851610	NC_000001.11	25020224	25036545	dbSUPER_CD8_primary_SE_22581	1563	1563	16321	1	0.0957662
NC_000001.11	25022138	25023701	RefSeqFE_enhancer_GeneID:109851610	NC_000001.11	25020460	25035315	dbSUPER_CD4p_CD25-_CD45ROp_Memory_SE_18229	1563	1563	14855	1	0.105217
NC_000001.11	25022138	25023701	RefSeqFE_enhancer_GeneID:109851610	NC_000001.11	25020463	25037795	dbSUPER_CD56_SE_20229	1563	1563	17332	1	0.09018
NC_000001.11	25022138	25023701	RefSeqFE_enhancer_GeneID:109851610	NC_000001.11	25020667	25035020	dbSUPER_CD34_Primary_RO01480_SE_13266	1563	1563	14353	1	0.108897
NC_000001.11	25022138	25023701	RefSeqFE_enhancer_GeneID:109851610	NC_000001.11	25020977	25035055	dbSUPER_CD3_SE_12047	1563	1563	14078	1	0.111024
NC_000001.11	25895417	25895712	RefSeqFE_enhancer_GeneID:112577571	NC_000001.11	25895000	25896000	Ensembl104_CTCF_binding_site:ENSR00000351356	295	295	1000	1	0.295
NC_000001.11	25895417	25895712	RefSeqFE_enhancer_GeneID:112577571	NC_000001.11	25895383	25895733	ENCODEcCRE_EH38E1329993_distal_enhancer	295	295	350	1	0.842857
NC_000001.11	25895417	25895712	RefSeqFE_enhancer_GeneID:112577571	NC_000001.11	25874095	25908568	dbSUPER_Brain_Hippocampus_Middle_SE_06612	295	295	34473	1	0.00855742
NC_000001.11	25895417	25895712	RefSeqFE_enhancer_GeneID:112577571	NC_000001.11	25874638	25934260	dbSUPER_Brain_Angular_Gyrus_SE_03348	295	295	59622	1	0.00494784
NC_000001.11	25895417	25895712	RefSeqFE_enhancer_GeneID:112577571	NC_000001.11	25890858	25923769	dbSUPER_HSMMtube_SE_37807	295	295	32911	1	0.00896357
NC_000001.11	25895417	25895712	RefSeqFE_enhancer_GeneID:112577571	NC_000001.11	25892096	25934751	dbSUPER_Brain_Hippocampus_Middle_150_SE_07163	295	295	42655	1	0.00691595
NC_000001.11	25895417	25895712	RefSeqFE_enhancer_GeneID:112577571	NC_000001.11	25893466	25934156	dbSUPER_Brain_Cingulate_Gyrus_SE_05300	295	295	40690	1	0.00724994
NC_000001.11	25895417	25895712	RefSeqFE_enhancer_GeneID:112577571	NC_000001.11	25895194	25927814	dbSUPER_Brain_Anterior_Caudate_SE_04754	295	295	32620	1	0.00904353
NC_000001.11	25933355	25934013	RefSeqFE_transcriptional_cis_regulatory_region_GeneID:115801417	NC_000001.11	25933478	25933821	ENCODEcCRE_EH38E1330044_distal_enhancer	343	658	343	0.521277	1
NC_000001.11	25933355	25934013	RefSeqFE_transcriptional_cis_regulatory_region_GeneID:115801417	NC_000001.11	25933910	25934061	ENCODEcCRE_EH38E1330045_distal_enhancer	103	658	151	0.156535	0.682119
NC_000001.11	25933355	25934013	RefSeqFE_transcriptional_cis_regulatory_region_GeneID:115801417	NC_000001.11	25874638	25934260	dbSUPER_Brain_Angular_Gyrus_SE_03348	658	658	59622	1	0.0110362
NC_000001.11	25933355	25934013	RefSeqFE_transcriptional_cis_regulatory_region_GeneID:115801417	NC_000001.11	25892096	25934751	dbSUPER_Brain_Hippocampus_Middle_150_SE_07163	658	658	42655	1	0.0154261
NC_000001.11	25933355	25934013	RefSeqFE_transcriptional_cis_regulatory_region_GeneID:115801417	NC_000001.11	25893466	25934156	dbSUPER_Brain_Cingulate_Gyrus_SE_05300	658	658	40690	1	0.016171
NC_000001.11	26093361	26098252	RefSeqFE_enhancer_GeneID:110121289	NC_000001.11	26093361	26098252	VISTA_enhancer_positive_hs2271	4891	4891	4891	1	1
NC_000001.11	26093361	26098252	RefSeqFE_enhancer_GeneID:110121289	NC_000001.11	26093606	26093932	ENCODEcCRE_EH38E1330209_distal_enhancer	326	4891	326	0.066653	1
NC_000001.11	26093361	26098252	RefSeqFE_enhancer_GeneID:110121289	NC_000001.11	26094132	26094298	ENCODEcCRE_EH38E1330210_distal_enhancer	166	4891	166	0.0339399	1
NC_000001.11	26093361	26098252	RefSeqFE_enhancer_GeneID:110121289	NC_000001.11	26094303	26094653	ENCODEcCRE_EH38E1330211_distal_enhancer	350	4891	350	0.07156	1
NC_000001.11	26093361	26098252	RefSeqFE_enhancer_GeneID:110121289	NC_000001.11	26094389	26094633	FANTOM5_enhancer_chr1:26094389-26094633	244	4891	244	0.0498875	1
NC_000001.11	26093361	26098252	RefSeqFE_enhancer_GeneID:110121289	NC_000001.11	26094400	26095000	Ensembl104_CTCF_binding_site:ENSR00000351421	600	4891	600	0.122674	1
NC_000001.11	26093361	26098252	RefSeqFE_enhancer_GeneID:110121289	NC_000001.11	26094775	26095124	ENCODEcCRE_EH38E1330212_distal_enhancer	349	4891	349	0.0713556	1
NC_000001.11	26093361	26098252	RefSeqFE_enhancer_GeneID:110121289	NC_000001.11	26096200	26098800	Ensembl104_enhancer:ENSR00000921547	2052	4891	2600	0.419546	0.789231
NC_000001.11	26093361	26098252	RefSeqFE_enhancer_GeneID:110121289	NC_000001.11	26097701	26098042	ENCODEcCRE_EH38E1330216_distal_enhancer	341	4891	341	0.0697199	1
NC_000001.11	26093361	26098252	RefSeqFE_enhancer_GeneID:110121289	NC_000001.11	26023872	26095651	dbSUPER_Psoas_Muscle_SE_48141	2290	4891	71779	0.468207	0.0319035
NC_000001.11	26093361	26098252	RefSeqFE_enhancer_GeneID:110121289	NC_000001.11	26034707	26095517	dbSUPER_Right_Ventricle_SE_49516	2156	4891	60810	0.44081	0.0354547
NC_000001.11	26093361	26098252	RefSeqFE_enhancer_GeneID:110121289	NC_000001.11	26059924	26122558	dbSUPER_Lung_SE_42814	4891	4891	62634	1	0.0780886
NC_000001.11	26378037	26378931	RefSeqFE_transcriptional_cis_regulatory_region_GeneID:115801418	NC_000001.11	26378403	26378753	ENCODEcCRE_EH38E1330470_distal_enhancer	350	894	350	0.391499	1
NC_000001.11	26378037	26378931	RefSeqFE_transcriptional_cis_regulatory_region_GeneID:115801418	NC_000001.11	26377990	26378340	ENCODEcCRE_EH38E1330469_distal_enhancer	303	894	350	0.338926	0.865714
NC_000001.11	26378037	26378931	RefSeqFE_transcriptional_cis_regulatory_region_GeneID:115801418	NC_000001.11	26378199	26378601	Ensembl104_promoter:ENSR00000351511	402	894	402	0.449664	1
NC_000001.11	26508575	26508796	RefSeqFE_transcriptional_cis_regulatory_region_GeneID:115801419	NC_000001.11	26508303	26508720	Ensembl104_TF_binding_site:ENSR00000351535	145	221	417	0.656109	0.347722
NC_000001.11	26723099	26724341	RefSeqFE_enhancer_GeneID:107988049	NC_000001.11	26722999	26724001	Ensembl104_promoter:ENSR00000351589	902	1242	1002	0.726248	0.9002
NC_000001.11	26723099	26724341	RefSeqFE_enhancer_GeneID:107988049	NC_000001.11	26723128	26724414	VISTA_enhancer_positive_hs569	1213	1242	1286	0.976651	0.943235
NC_000001.11	26723099	26724341	RefSeqFE_enhancer_GeneID:107988049	NC_000001.11	26723294	26723526	ENCODEcCRE_EH38E1330746_distal_enhancer	232	1242	232	0.186795	1
NC_000001.11	26723099	26724341	RefSeqFE_enhancer_GeneID:107988049	NC_000001.11	26723551	26723901	ENCODEcCRE_EH38E1330747_distal_enhancer	350	1242	350	0.281804	1
NC_000001.11	26723099	26724341	RefSeqFE_enhancer_GeneID:107988049	NC_000001.11	26676511	26789818	dbSUPER_CD14_SE_09344	1242	1242	113307	1	0.0109614
NC_000001.11	26723099	26724341	RefSeqFE_enhancer_GeneID:107988049	NC_000001.11	26677382	26748731	dbSUPER_CD34_Primary_RO01536_SE_13430	1242	1242	71349	1	0.0174074
NC_000001.11	26723099	26724341	RefSeqFE_enhancer_GeneID:107988049	NC_000001.11	26682340	26806175	dbSUPER_CD4_Memory_Primary_7pool_SE_14400	1242	1242	123835	1	0.0100295
NC_000001.11	26723099	26724341	RefSeqFE_enhancer_GeneID:107988049	NC_000001.11	26691447	26790462	dbSUPER_CD20_SE_11056	1242	1242	99015	1	0.0125436
NC_000001.11	26723099	26724341	RefSeqFE_enhancer_GeneID:107988049	NC_000001.11	26691593	26802884	dbSUPER_CD4p_CD25-_Il17-_PMAstim_Th_SE_18323	1242	1242	111291	1	0.0111599
NC_000001.11	26723128	26724414	RefSeqFE_enhancer_GeneID:107988049	NC_000001.11	26722999	26724001	Ensembl104_promoter:ENSR00000351589	873	1286	1002	0.678849	0.871257
NC_000001.11	26723128	26724414	RefSeqFE_enhancer_GeneID:107988049	NC_000001.11	26723128	26724414	VISTA_enhancer_positive_hs569	1286	1286	1286	1	1
NC_000001.11	26723128	26724414	RefSeqFE_enhancer_GeneID:107988049	NC_000001.11	26723294	26723526	ENCODEcCRE_EH38E1330746_distal_enhancer	232	1286	232	0.180404	1
NC_000001.11	26723128	26724414	RefSeqFE_enhancer_GeneID:107988049	NC_000001.11	26723551	26723901	ENCODEcCRE_EH38E1330747_distal_enhancer	350	1286	350	0.272162	1
NC_000001.11	26723128	26724414	RefSeqFE_enhancer_GeneID:107988049	NC_000001.11	26676511	26789818	dbSUPER_CD14_SE_09344	1286	1286	113307	1	0.0113497
NC_000001.11	26723128	26724414	RefSeqFE_enhancer_GeneID:107988049	NC_000001.11	26677382	26748731	dbSUPER_CD34_Primary_RO01536_SE_13430	1286	1286	71349	1	0.0180241
NC_000001.11	26723128	26724414	RefSeqFE_enhancer_GeneID:107988049	NC_000001.11	26682340	26806175	dbSUPER_CD4_Memory_Primary_7pool_SE_14400	1286	1286	123835	1	0.0103848
NC_000001.11	26723128	26724414	RefSeqFE_enhancer_GeneID:107988049	NC_000001.11	26691447	26790462	dbSUPER_CD20_SE_11056	1286	1286	99015	1	0.0129879
NC_000001.11	26723128	26724414	RefSeqFE_enhancer_GeneID:107988049	NC_000001.11	26691593	26802884	dbSUPER_CD4p_CD25-_Il17-_PMAstim_Th_SE_18323	1286	1286	111291	1	0.0115553
NC_000001.11	26990677	26990972	RefSeqFE_enhancer_GeneID:112577572	NC_000001.11	26990569	26990916	ENCODEcCRE_EH38E1330972_distal_enhancer	239	295	347	0.810169	0.688761
NC_000001.11	26990677	26990972	RefSeqFE_enhancer_GeneID:112577572	NC_000001.11	26990961	26991139	ENCODEcCRE_EH38E1330973_distal_enhancer	11	295	178	0.0372881	0.0617978
NC_000001.11	26990677	26990972	RefSeqFE_enhancer_GeneID:112577572	NC_000001.11	26969299	27013607	dbSUPER_Gastric_SE_31795	295	295	44308	1	0.00665794
NC_000001.11	26990677	26990972	RefSeqFE_enhancer_GeneID:112577572	NC_000001.11	26986935	27011169	dbSUPER_Pancreas_SE_47963	295	295	24234	1	0.012173
NC_000001.11	26990677	26990972	RefSeqFE_enhancer_GeneID:112577572	NC_000001.11	26989245	27013705	dbSUPER_HCT-116_SE_34461	295	295	24460	1	0.0120605
NC_000001.11	26997677	26997972	RefSeqFE_enhancer_GeneID:112577573	NC_000001.11	26991599	27000601	Ensembl104_promoter:ENSR00000351671	295	295	9002	1	0.0327705
NC_000001.11	26997677	26997972	RefSeqFE_enhancer_GeneID:112577573	NC_000001.11	26996800	26998200	Ensembl104_CTCF_binding_site:ENSR00000351677	295	295	1400	1	0.210714
NC_000001.11	26997677	26997972	RefSeqFE_enhancer_GeneID:112577573	NC_000001.11	26997660	26998003	ENCODEcCRE_EH38E1330986_distal_enhancer	295	295	343	1	0.860058
NC_000001.11	26997677	26997972	RefSeqFE_enhancer_GeneID:112577573	NC_000001.11	26969299	27013607	dbSUPER_Gastric_SE_31795	295	295	44308	1	0.00665794
NC_000001.11	26997677	26997972	RefSeqFE_enhancer_GeneID:112577573	NC_000001.11	26986935	27011169	dbSUPER_Pancreas_SE_47963	295	295	24234	1	0.012173
NC_000001.11	26997677	26997972	RefSeqFE_enhancer_GeneID:112577573	NC_000001.11	26989245	27013705	dbSUPER_HCT-116_SE_34461	295	295	24460	1	0.0120605
NC_000001.11	26997677	26997972	RefSeqFE_enhancer_GeneID:112577573	NC_000001.11	26993445	27013485	dbSUPER_Right_Atrium_SE_49333	295	295	20040	1	0.0147206
NC_000001.11	26997677	26997972	RefSeqFE_enhancer_GeneID:112577573	NC_000001.11	26993609	27013598	dbSUPER_Esophagus_SE_26796	295	295	19989	1	0.0147581
NC_000001.11	26997677	26997972	RefSeqFE_enhancer_GeneID:112577573	NC_000001.11	26993629	27013690	dbSUPER_HMEC_SE_36077	295	295	20061	1	0.0147051
NC_000001.11	26997677	26997972	RefSeqFE_enhancer_GeneID:112577573	NC_000001.11	26994447	27013445	dbSUPER_NHEK_SE_65116	295	295	18998	1	0.015528
NC_000001.11	26997677	26997972	RefSeqFE_enhancer_GeneID:112577573	NC_000001.11	26997342	27013504	dbSUPER_Lung_SE_43164	295	295	16162	1	0.0182527
NC_000001.11	26997677	26997972	RefSeqFE_enhancer_GeneID:112577573	NC_000001.11	26997791	27011310	dbSUPER_H1_SE_32801	181	295	13519	0.613559	0.0133886
NC_000001.11	27122657	27122952	RefSeqFE_enhancer_GeneID:112577574	NC_000001.11	27122656	27122982	ENCODEcCRE_EH38E1331122_distal_enhancer	295	295	326	1	0.904908
NC_000001.11	27122657	27122952	RefSeqFE_enhancer_GeneID:112577574	NC_000001.11	27097465	27162380	dbSUPER_CD14_SE_09350	295	295	64915	1	0.0045444
NC_000001.11	27122657	27122952	RefSeqFE_enhancer_GeneID:112577574	NC_000001.11	27097963	27155953	dbSUPER_Left_Ventricle_SE_41510	295	295	57990	1	0.00508708
NC_000001.11	27122657	27122952	RefSeqFE_enhancer_GeneID:112577574	NC_000001.11	27098053	27156048	dbSUPER_Lung_SE_42522	295	295	57995	1	0.00508665
NC_000001.11	27122657	27122952	RefSeqFE_enhancer_GeneID:112577574	NC_000001.11	27098116	27162641	dbSUPER_Spleen_SE_53642	295	295	64525	1	0.00457187
NC_000001.11	27122657	27122952	RefSeqFE_enhancer_GeneID:112577574	NC_000001.11	27098153	27162595	dbSUPER_Gastric_SE_31553	295	295	64442	1	0.00457776
NC_000001.11	27122657	27122952	RefSeqFE_enhancer_GeneID:112577574	NC_000001.11	27098241	27156468	dbSUPER_HSMMtube_SE_37352	295	295	58227	1	0.00506638
NC_000001.11	27122657	27122952	RefSeqFE_enhancer_GeneID:112577574	NC_000001.11	27098272	27162671	dbSUPER_Sigmoid_Colon_SE_50517	295	295	64399	1	0.00458082
NC_000001.11	27122657	27122952	RefSeqFE_enhancer_GeneID:112577574	NC_000001.11	27098578	27156176	dbSUPER_Brain_Inferior_Temporal_Lobe_SE_08182	295	295	57598	1	0.00512171
NC_000001.11	27122657	27122952	RefSeqFE_enhancer_GeneID:112577574	NC_000001.11	27098681	27162639	dbSUPER_Small_Intestine_SE_52500	295	295	63958	1	0.0046124
NC_000001.11	27122657	27122952	RefSeqFE_enhancer_GeneID:112577574	NC_000001.11	27098782	27156300	dbSUPER_Duodenum_Smooth_Muscle_SE_26354	295	295	57518	1	0.00512883
NC_000001.11	27122657	27122952	RefSeqFE_enhancer_GeneID:112577574	NC_000001.11	27098794	27162627	dbSUPER_Colon_Crypt_1_SE_23485	295	295	63833	1	0.00462143
NC_000001.11	27122657	27122952	RefSeqFE_enhancer_GeneID:112577574	NC_000001.11	27098870	27155315	dbSUPER_Adrenal_Gland_SE_01262	295	295	56445	1	0.00522633
NC_000001.11	27122657	27122952	RefSeqFE_enhancer_GeneID:112577574	NC_000001.11	27098918	27162537	dbSUPER_Colon_Crypt_2_SE_24258	295	295	63619	1	0.00463698
NC_000001.11	27122657	27122952	RefSeqFE_enhancer_GeneID:112577574	NC_000001.11	27106233	27155976	dbSUPER_Brain_Anterior_Caudate_SE_04452	295	295	49743	1	0.00593048
NC_000001.11	27122657	27122952	RefSeqFE_enhancer_GeneID:112577574	NC_000001.11	27112201	27153919	dbSUPER_Brain_Angular_Gyrus_SE_03596	295	295	41718	1	0.00707129
NC_000001.11	27122657	27122952	RefSeqFE_enhancer_GeneID:112577574	NC_000001.11	27114959	27156015	dbSUPER_Right_Atrium_SE_49041	295	295	41056	1	0.00718531
NC_000001.11	27867112	27867634	RefSeqFE_transcriptional_cis_regulatory_region_GeneID:115801420	NC_000001.11	27867235	27867585	ENCODEcCRE_EH38E1331827_distal_enhancer	350	522	350	0.670498	1
NC_000001.11	27867112	27867634	RefSeqFE_transcriptional_cis_regulatory_region_GeneID:115801420	NC_000001.11	27857847	27913285	dbSUPER_CD14_SE_09233	522	522	55438	1	0.00941592
NC_000001.11	27867112	27867634	RefSeqFE_transcriptional_cis_regulatory_region_GeneID:115801420	NC_000001.11	27857904	27893770	dbSUPER_Tonsil_SE_62491	522	522	35866	1	0.0145542
NC_000001.11	27867112	27867634	RefSeqFE_transcriptional_cis_regulatory_region_GeneID:115801420	NC_000001.11	27858029	27893140	dbSUPER_Spleen_SE_53500	522	522	35111	1	0.0148671
NC_000001.11	27867112	27867634	RefSeqFE_transcriptional_cis_regulatory_region_GeneID:115801420	NC_000001.11	27862060	27893364	dbSUPER_Sigmoid_Colon_SE_50884	522	522	31304	1	0.0166752
NC_000001.11	27867112	27867634	RefSeqFE_transcriptional_cis_regulatory_region_GeneID:115801420	NC_000001.11	27862430	27895323	dbSUPER_CD56_SE_20343	522	522	32893	1	0.0158696
NC_000001.11	28369517	28369812	RefSeqFE_enhancer_GeneID:112577575	NC_000001.11	28368999	28372201	Ensembl104_promoter:ENSR00000003860	295	295	3202	1	0.0921299
NC_000001.11	28369517	28369812	RefSeqFE_enhancer_GeneID:112577575	NC_000001.11	28369465	28369799	ENCODEcCRE_EH38E1332245_promoter	282	295	334	0.955932	0.844311
NC_000001.11	28552796	28553091	RefSeqFE_enhancer_GeneID:112577576	NC_000001.11	28551799	28554601	Ensembl104_promoter:ENSR00000003883	295	295	2802	1	0.105282
NC_000001.11	28552796	28553091	RefSeqFE_enhancer_GeneID:112577576	NC_000001.11	28552800	28553150	ENCODEcCRE_EH38E1332385_promoter	291	295	350	0.986441	0.831429
NC_000001.11	28775156	28775451	RefSeqFE_enhancer_GeneID:112577577	NC_000001.11	28775032	28775462	FANTOM5_enhancer_chr1:28775032-28775462	295	295	430	1	0.686047
NC_000001.11	28775156	28775451	RefSeqFE_enhancer_GeneID:112577577	NC_000001.11	28775241	28775585	ENCODEcCRE_EH38E1332528_distal_enhancer	210	295	344	0.711864	0.610465
NC_000001.11	28883747	28884318	RefSeqFE_transcriptional_cis_regulatory_region_GeneID:111501765	NC_000001.11	28883438	28883758	ENCODEcCRE_EH38E1332594_proximal_enhancer	11	571	320	0.0192644	0.034375
NC_000001.11	28883747	28884318	RefSeqFE_transcriptional_cis_regulatory_region_GeneID:111501765	NC_000001.11	28883600	28884600	Ensembl104_CTCF_binding_site:ENSR00000352127	571	571	1000	1	0.571
NC_000001.11	28883747	28884318	RefSeqFE_transcriptional_cis_regulatory_region_GeneID:111501765	NC_000001.11	28883799	28884201	Ensembl104_promoter:ENSR00000003917	402	571	402	0.704028	1
NC_000001.11	28883747	28884318	RefSeqFE_transcriptional_cis_regulatory_region_GeneID:111501765	NC_000001.11	28883870	28884220	ENCODEcCRE_EH38E1332595_distal_enhancer	350	571	350	0.61296	1
NC_000001.11	28883747	28884318	RefSeqFE_transcriptional_cis_regulatory_region_GeneID:111501765	NC_000001.11	28881968	28903124	dbSUPER_K562_SE_39906	571	571	21156	1	0.02699
NC_000001.11	28883747	28884318	RefSeqFE_transcriptional_cis_regulatory_region_GeneID:111501765	NC_000001.11	28882025	28933944	dbSUPER_CD4_Memory_Primary_7pool_SE_14593	571	571	51919	1	0.0109979
NC_000001.11	28884044	28884189	RefSeqFE_enhancer_GeneID:111501765	NC_000001.11	28883600	28884600	Ensembl104_CTCF_binding_site:ENSR00000352127	145	145	1000	1	0.145
NC_000001.11	28884044	28884189	RefSeqFE_enhancer_GeneID:111501765	NC_000001.11	28883799	28884201	Ensembl104_promoter:ENSR00000003917	145	145	402	1	0.360697
NC_000001.11	28884044	28884189	RefSeqFE_enhancer_GeneID:111501765	NC_000001.11	28883870	28884220	ENCODEcCRE_EH38E1332595_distal_enhancer	145	145	350	1	0.414286
NC_000001.11	28884044	28884189	RefSeqFE_enhancer_GeneID:111501765	NC_000001.11	28881968	28903124	dbSUPER_K562_SE_39906	145	145	21156	1	0.00685385
NC_000001.11	28884044	28884189	RefSeqFE_enhancer_GeneID:111501765	NC_000001.11	28882025	28933944	dbSUPER_CD4_Memory_Primary_7pool_SE_14593	145	145	51919	1	0.00279281
NC_000001.11	28884107	28884125	RefSeqFE_transcriptional_cis_regulatory_region_GeneID:111501765	NC_000001.11	28883600	28884600	Ensembl104_CTCF_binding_site:ENSR00000352127	18	18	1000	1	0.018
NC_000001.11	28884107	28884125	RefSeqFE_transcriptional_cis_regulatory_region_GeneID:111501765	NC_000001.11	28883799	28884201	Ensembl104_promoter:ENSR00000003917	18	18	402	1	0.0447761
NC_000001.11	28884107	28884125	RefSeqFE_transcriptional_cis_regulatory_region_GeneID:111501765	NC_000001.11	28883870	28884220	ENCODEcCRE_EH38E1332595_distal_enhancer	18	18	350	1	0.0514286
NC_000001.11	28884107	28884125	RefSeqFE_transcriptional_cis_regulatory_region_GeneID:111501765	NC_000001.11	28881968	28903124	dbSUPER_K562_SE_39906	18	18	21156	1	0.000850822
NC_000001.11	28884107	28884125	RefSeqFE_transcriptional_cis_regulatory_region_GeneID:111501765	NC_000001.11	28882025	28933944	dbSUPER_CD4_Memory_Primary_7pool_SE_14593	18	18	51919	1	0.000346694
NC_000001.11	28884561	28885466	RefSeqFE_transcriptional_cis_regulatory_region_GeneID:115801421	NC_000001.11	28883600	28884600	Ensembl104_CTCF_binding_site:ENSR00000352127	39	905	1000	0.0430939	0.039
NC_000001.11	28884561	28885466	RefSeqFE_transcriptional_cis_regulatory_region_GeneID:115801421	NC_000001.11	28884497	28884685	ENCODEcCRE_EH38E1332596_distal_enhancer	124	905	188	0.137017	0.659574
NC_000001.11	28884561	28885466	RefSeqFE_transcriptional_cis_regulatory_region_GeneID:115801421	NC_000001.11	28884733	28884895	ENCODEcCRE_EH38E1332597_distal_enhancer	162	905	162	0.179006	1
NC_000001.11	28884561	28885466	RefSeqFE_transcriptional_cis_regulatory_region_GeneID:115801421	NC_000001.11	28885223	28885238	FANTOM5_enhancer_chr1:28885223-28885238	15	905	15	0.0165746	1
NC_000001.11	28884561	28885466	RefSeqFE_transcriptional_cis_regulatory_region_GeneID:115801421	NC_000001.11	28881968	28903124	dbSUPER_K562_SE_39906	905	905	21156	1	0.0427775
NC_000001.11	28884561	28885466	RefSeqFE_transcriptional_cis_regulatory_region_GeneID:115801421	NC_000001.11	28882025	28933944	dbSUPER_CD4_Memory_Primary_7pool_SE_14593	905	905	51919	1	0.017431
NC_000001.11	28884561	28885466	RefSeqFE_transcriptional_cis_regulatory_region_GeneID:115801421	NC_000001.11	28884986	28885336	ENCODEcCRE_EH38E1332598_proximal_enhancer	350	905	350	0.38674	1
NC_000001.11	29313136	29313431	RefSeqFE_silencer_GeneID:113939988	NC_000001.11	29313000	29313400	Ensembl104_CTCF_binding_site:ENSR00000352226	264	295	400	0.894915	0.66
NC_000001.11	29313136	29313431	RefSeqFE_silencer_GeneID:113939988	NC_000001.11	29313177	29313334	ENCODEcCRE_EH38E1332912_CTCF-only	157	295	157	0.532203	1
NC_000001.11	29313136	29313431	RefSeqFE_silencer_GeneID:113939988	NC_000001.11	29313207	29313449	Ensembl104_TF_binding_site:ENSR00000352227	224	295	242	0.759322	0.92562
NC_000001.11	30777480	30778146	RefSeqFE_transcriptional_cis_regulatory_region_GeneID:115801422	NC_000001.11	30777507	30777837	ENCODEcCRE_EH38E1333584_distal_enhancer	330	666	330	0.495495	1
NC_000001.11	30777480	30778146	RefSeqFE_transcriptional_cis_regulatory_region_GeneID:115801422	NC_000001.11	30777579	30777735	FANTOM5_enhancer_chr1:30777579-30777735	156	666	156	0.234234	1
NC_000001.11	30777480	30778146	RefSeqFE_transcriptional_cis_regulatory_region_GeneID:115801422	NC_000001.11	30777600	30780200	Ensembl104_CTCF_binding_site:ENSR00000251036	546	666	2600	0.81982	0.21
NC_000001.11	30777480	30778146	RefSeqFE_transcriptional_cis_regulatory_region_GeneID:115801422	NC_000001.11	30777890	30778076	ENCODEcCRE_EH38E1333585_distal_enhancer	186	666	186	0.279279	1
NC_000001.11	30777480	30778146	RefSeqFE_transcriptional_cis_regulatory_region_GeneID:115801422	NC_000001.11	30728698	30780931	dbSUPER_Tonsil_SE_62248	666	666	52233	1	0.0127506
NC_000001.11	30777480	30778146	RefSeqFE_transcriptional_cis_regulatory_region_GeneID:115801422	NC_000001.11	30732207	30780178	dbSUPER_HBL1_SE_61144	666	666	47971	1	0.0138834
NC_000001.11	30777480	30778146	RefSeqFE_transcriptional_cis_regulatory_region_GeneID:115801422	NC_000001.11	30740599	30780012	dbSUPER_CD34_Primary_RO01536_SE_13496	666	666	39413	1	0.016898
NC_000001.11	30777480	30778146	RefSeqFE_transcriptional_cis_regulatory_region_GeneID:115801422	NC_000001.11	30742679	30780068	dbSUPER_CD8_Memory_7pool_SE_20783	666	666	37389	1	0.0178127
NC_000001.11	30777480	30778146	RefSeqFE_transcriptional_cis_regulatory_region_GeneID:115801422	NC_000001.11	30759728	30784018	dbSUPER_K562_SE_39886	666	666	24290	1	0.0274187
NC_000001.11	30777480	30778146	RefSeqFE_transcriptional_cis_regulatory_region_GeneID:115801422	NC_000001.11	30761614	30778111	dbSUPER_CD34_adult_SE_12625	631	666	16497	0.947447	0.0382494
NC_000001.11	30779459	30779984	RefSeqFE_transcriptional_cis_regulatory_region_GeneID:115801423	NC_000001.11	30777600	30780200	Ensembl104_CTCF_binding_site:ENSR00000251036	525	525	2600	1	0.201923
NC_000001.11	30779459	30779984	RefSeqFE_transcriptional_cis_regulatory_region_GeneID:115801423	NC_000001.11	30779576	30779922	ENCODEcCRE_EH38E1333588_distal_enhancer	346	525	346	0.659048	1
NC_000001.11	30779459	30779984	RefSeqFE_transcriptional_cis_regulatory_region_GeneID:115801423	NC_000001.11	30728698	30780931	dbSUPER_Tonsil_SE_62248	525	525	52233	1	0.0100511
NC_000001.11	30779459	30779984	RefSeqFE_transcriptional_cis_regulatory_region_GeneID:115801423	NC_000001.11	30732207	30780178	dbSUPER_HBL1_SE_61144	525	525	47971	1	0.0109441
NC_000001.11	30779459	30779984	RefSeqFE_transcriptional_cis_regulatory_region_GeneID:115801423	NC_000001.11	30740599	30780012	dbSUPER_CD34_Primary_RO01536_SE_13496	525	525	39413	1	0.0133205
NC_000001.11	30779459	30779984	RefSeqFE_transcriptional_cis_regulatory_region_GeneID:115801423	NC_000001.11	30742679	30780068	dbSUPER_CD8_Memory_7pool_SE_20783	525	525	37389	1	0.0140416
NC_000001.11	30779459	30779984	RefSeqFE_transcriptional_cis_regulatory_region_GeneID:115801423	NC_000001.11	30759728	30784018	dbSUPER_K562_SE_39886	525	525	24290	1	0.0216138
NC_000001.11	31428805	31434663	RefSeqFE_meiotic_recombination_region_GeneID:110594336	NC_000001.11	31430575	31430881	ENCODEcCRE_EH38E1334116_distal_enhancer	306	5858	306	0.0522363	1
NC_000001.11	31428805	31434663	RefSeqFE_meiotic_recombination_region_GeneID:110594336	NC_000001.11	31431597	31432306	Ensembl104_promoter_flanking_region:ENSR00000922121	709	5858	709	0.121031	1
NC_000001.11	31428805	31434663	RefSeqFE_meiotic_recombination_region_GeneID:110594336	NC_000001.11	31431800	31432000	Ensembl104_CTCF_binding_site:ENSR00000352770	200	5858	200	0.0341413	1
NC_000001.11	31428805	31434663	RefSeqFE_meiotic_recombination_region_GeneID:110594336	NC_000001.11	31432012	31432207	ENCODEcCRE_EH38E1334118_distal_enhancer	195	5858	195	0.0332878	1
NC_000001.11	31428805	31434663	RefSeqFE_meiotic_recombination_region_GeneID:110594336	NC_000001.11	31434158	31434353	ENCODEcCRE_EH38E1334120_distal_enhancer	195	5858	195	0.0332878	1
NC_000001.11	31428805	31434663	RefSeqFE_meiotic_recombination_region_GeneID:110594336	NC_000001.11	31434166	31434999	Ensembl104_promoter_flanking_region:ENSR00000352771	497	5858	833	0.0848412	0.596639
NC_000001.11	31428805	31434663	RefSeqFE_meiotic_recombination_region_GeneID:110594336	NC_000001.11	31434391	31434699	ENCODEcCRE_EH38E1334121_distal_enhancer	272	5858	308	0.0464322	0.883117
NC_000001.11	31428805	31434663	RefSeqFE_meiotic_recombination_region_GeneID:110594336	NC_000001.11	31412637	31453860	dbSUPER_Colon_Crypt_1_SE_23283	5858	5858	41223	1	0.142105
NC_000001.11	31429571	31434255	RefSeqFE_meiotic_recombination_region_GeneID:110594336	NC_000001.11	31430575	31430881	ENCODEcCRE_EH38E1334116_distal_enhancer	306	4684	306	0.0653288	1
NC_000001.11	31429571	31434255	RefSeqFE_meiotic_recombination_region_GeneID:110594336	NC_000001.11	31431597	31432306	Ensembl104_promoter_flanking_region:ENSR00000922121	709	4684	709	0.151366	1
NC_000001.11	31429571	31434255	RefSeqFE_meiotic_recombination_region_GeneID:110594336	NC_000001.11	31431800	31432000	Ensembl104_CTCF_binding_site:ENSR00000352770	200	4684	200	0.0426985	1
NC_000001.11	31429571	31434255	RefSeqFE_meiotic_recombination_region_GeneID:110594336	NC_000001.11	31432012	31432207	ENCODEcCRE_EH38E1334118_distal_enhancer	195	4684	195	0.0416311	1
NC_000001.11	31429571	31434255	RefSeqFE_meiotic_recombination_region_GeneID:110594336	NC_000001.11	31434158	31434353	ENCODEcCRE_EH38E1334120_distal_enhancer	97	4684	195	0.0207088	0.497436
NC_000001.11	31429571	31434255	RefSeqFE_meiotic_recombination_region_GeneID:110594336	NC_000001.11	31434166	31434999	Ensembl104_promoter_flanking_region:ENSR00000352771	89	4684	833	0.0190009	0.106843
NC_000001.11	31429571	31434255	RefSeqFE_meiotic_recombination_region_GeneID:110594336	NC_000001.11	31412637	31453860	dbSUPER_Colon_Crypt_1_SE_23283	4684	4684	41223	1	0.113626
NC_000001.11	31430127	31430143	RefSeqFE_nucleotide_motif_GeneID:110594336	NC_000001.11	31412637	31453860	dbSUPER_Colon_Crypt_1_SE_23283	16	16	41223	1	0.000388133
NC_000001.11	31431103	31431119	RefSeqFE_nucleotide_motif_GeneID:110594336	NC_000001.11	31412637	31453860	dbSUPER_Colon_Crypt_1_SE_23283	16	16	41223	1	0.000388133
NC_000001.11	31431433	31432680	RefSeqFE_repeat_instability_region_GeneID:110594336	NC_000001.11	31431597	31432306	Ensembl104_promoter_flanking_region:ENSR00000922121	709	1247	709	0.568565	1
NC_000001.11	31431433	31432680	RefSeqFE_repeat_instability_region_GeneID:110594336	NC_000001.11	31431800	31432000	Ensembl104_CTCF_binding_site:ENSR00000352770	200	1247	200	0.160385	1
NC_000001.11	31431433	31432680	RefSeqFE_repeat_instability_region_GeneID:110594336	NC_000001.11	31432012	31432207	ENCODEcCRE_EH38E1334118_distal_enhancer	195	1247	195	0.156375	1
NC_000001.11	31431433	31432680	RefSeqFE_repeat_instability_region_GeneID:110594336	NC_000001.11	31412637	31453860	dbSUPER_Colon_Crypt_1_SE_23283	1247	1247	41223	1	0.0302501
NC_000001.11	31431438	31433394	RefSeqFE_meiotic_recombination_region_GeneID:110594336	NC_000001.11	31431597	31432306	Ensembl104_promoter_flanking_region:ENSR00000922121	709	1956	709	0.362474	1
NC_000001.11	31431438	31433394	RefSeqFE_meiotic_recombination_region_GeneID:110594336	NC_000001.11	31431800	31432000	Ensembl104_CTCF_binding_site:ENSR00000352770	200	1956	200	0.102249	1
NC_000001.11	31431438	31433394	RefSeqFE_meiotic_recombination_region_GeneID:110594336	NC_000001.11	31432012	31432207	ENCODEcCRE_EH38E1334118_distal_enhancer	195	1956	195	0.0996933	1
NC_000001.11	31431438	31433394	RefSeqFE_meiotic_recombination_region_GeneID:110594336	NC_000001.11	31412637	31453860	dbSUPER_Colon_Crypt_1_SE_23283	1956	1956	41223	1	0.0474492
NC_000001.11	31431748	31432232	RefSeqFE_minisatellite_GeneID:110594336	NC_000001.11	31431597	31432306	Ensembl104_promoter_flanking_region:ENSR00000922121	484	484	709	1	0.682652
NC_000001.11	31431748	31432232	RefSeqFE_minisatellite_GeneID:110594336	NC_000001.11	31431800	31432000	Ensembl104_CTCF_binding_site:ENSR00000352770	200	484	200	0.413223	1
NC_000001.11	31431748	31432232	RefSeqFE_minisatellite_GeneID:110594336	NC_000001.11	31432012	31432207	ENCODEcCRE_EH38E1334118_distal_enhancer	195	484	195	0.402893	1
NC_000001.11	31431748	31432232	RefSeqFE_minisatellite_GeneID:110594336	NC_000001.11	31412637	31453860	dbSUPER_Colon_Crypt_1_SE_23283	484	484	41223	1	0.011741
NC_000001.11	31431754	31431767	RefSeqFE_nucleotide_motif_GeneID:110594336	NC_000001.11	31431597	31432306	Ensembl104_promoter_flanking_region:ENSR00000922121	13	13	709	1	0.0183357
NC_000001.11	31431754	31431767	RefSeqFE_nucleotide_motif_GeneID:110594336	NC_000001.11	31412637	31453860	dbSUPER_Colon_Crypt_1_SE_23283	13	13	41223	1	0.000315358
NC_000001.11	31431781	31431794	RefSeqFE_nucleotide_motif_GeneID:110594336	NC_000001.11	31431597	31432306	Ensembl104_promoter_flanking_region:ENSR00000922121	13	13	709	1	0.0183357
NC_000001.11	31431781	31431794	RefSeqFE_nucleotide_motif_GeneID:110594336	NC_000001.11	31412637	31453860	dbSUPER_Colon_Crypt_1_SE_23283	13	13	41223	1	0.000315358
NC_000001.11	31431799	31431812	RefSeqFE_nucleotide_motif_GeneID:110594336	NC_000001.11	31431597	31432306	Ensembl104_promoter_flanking_region:ENSR00000922121	13	13	709	1	0.0183357
NC_000001.11	31431799	31431812	RefSeqFE_nucleotide_motif_GeneID:110594336	NC_000001.11	31431800	31432000	Ensembl104_CTCF_binding_site:ENSR00000352770	12	13	200	0.923077	0.06
NC_000001.11	31431799	31431812	RefSeqFE_nucleotide_motif_GeneID:110594336	NC_000001.11	31412637	31453860	dbSUPER_Colon_Crypt_1_SE_23283	13	13	41223	1	0.000315358
NC_000001.11	31431817	31431830	RefSeqFE_nucleotide_motif_GeneID:110594336	NC_000001.11	31431597	31432306	Ensembl104_promoter_flanking_region:ENSR00000922121	13	13	709	1	0.0183357
NC_000001.11	31431817	31431830	RefSeqFE_nucleotide_motif_GeneID:110594336	NC_000001.11	31431800	31432000	Ensembl104_CTCF_binding_site:ENSR00000352770	13	13	200	1	0.065
NC_000001.11	31431817	31431830	RefSeqFE_nucleotide_motif_GeneID:110594336	NC_000001.11	31412637	31453860	dbSUPER_Colon_Crypt_1_SE_23283	13	13	41223	1	0.000315358
NC_000001.11	31431835	31431848	RefSeqFE_nucleotide_motif_GeneID:110594336	NC_000001.11	31431597	31432306	Ensembl104_promoter_flanking_region:ENSR00000922121	13	13	709	1	0.0183357
NC_000001.11	31431835	31431848	RefSeqFE_nucleotide_motif_GeneID:110594336	NC_000001.11	31431800	31432000	Ensembl104_CTCF_binding_site:ENSR00000352770	13	13	200	1	0.065
NC_000001.11	31431835	31431848	RefSeqFE_nucleotide_motif_GeneID:110594336	NC_000001.11	31412637	31453860	dbSUPER_Colon_Crypt_1_SE_23283	13	13	41223	1	0.000315358
NC_000001.11	31431853	31431866	RefSeqFE_nucleotide_motif_GeneID:110594336	NC_000001.11	31431597	31432306	Ensembl104_promoter_flanking_region:ENSR00000922121	13	13	709	1	0.0183357
NC_000001.11	31431853	31431866	RefSeqFE_nucleotide_motif_GeneID:110594336	NC_000001.11	31431800	31432000	Ensembl104_CTCF_binding_site:ENSR00000352770	13	13	200	1	0.065
NC_000001.11	31431853	31431866	RefSeqFE_nucleotide_motif_GeneID:110594336	NC_000001.11	31412637	31453860	dbSUPER_Colon_Crypt_1_SE_23283	13	13	41223	1	0.000315358
NC_000001.11	31431871	31431884	RefSeqFE_nucleotide_motif_GeneID:110594336	NC_000001.11	31431597	31432306	Ensembl104_promoter_flanking_region:ENSR00000922121	13	13	709	1	0.0183357
NC_000001.11	31431871	31431884	RefSeqFE_nucleotide_motif_GeneID:110594336	NC_000001.11	31431800	31432000	Ensembl104_CTCF_binding_site:ENSR00000352770	13	13	200	1	0.065
NC_000001.11	31431871	31431884	RefSeqFE_nucleotide_motif_GeneID:110594336	NC_000001.11	31412637	31453860	dbSUPER_Colon_Crypt_1_SE_23283	13	13	41223	1	0.000315358
NC_000001.11	31431889	31431902	RefSeqFE_nucleotide_motif_GeneID:110594336	NC_000001.11	31431597	31432306	Ensembl104_promoter_flanking_region:ENSR00000922121	13	13	709	1	0.0183357
NC_000001.11	31431889	31431902	RefSeqFE_nucleotide_motif_GeneID:110594336	NC_000001.11	31431800	31432000	Ensembl104_CTCF_binding_site:ENSR00000352770	13	13	200	1	0.065
NC_000001.11	31431889	31431902	RefSeqFE_nucleotide_motif_GeneID:110594336	NC_000001.11	31412637	31453860	dbSUPER_Colon_Crypt_1_SE_23283	13	13	41223	1	0.000315358
NC_000001.11	31431907	31431920	RefSeqFE_nucleotide_motif_GeneID:110594336	NC_000001.11	31431597	31432306	Ensembl104_promoter_flanking_region:ENSR00000922121	13	13	709	1	0.0183357
NC_000001.11	31431907	31431920	RefSeqFE_nucleotide_motif_GeneID:110594336	NC_000001.11	31431800	31432000	Ensembl104_CTCF_binding_site:ENSR00000352770	13	13	200	1	0.065
NC_000001.11	31431907	31431920	RefSeqFE_nucleotide_motif_GeneID:110594336	NC_000001.11	31412637	31453860	dbSUPER_Colon_Crypt_1_SE_23283	13	13	41223	1	0.000315358
NC_000001.11	31431925	31431938	RefSeqFE_nucleotide_motif_GeneID:110594336	NC_000001.11	31431597	31432306	Ensembl104_promoter_flanking_region:ENSR00000922121	13	13	709	1	0.0183357
NC_000001.11	31431925	31431938	RefSeqFE_nucleotide_motif_GeneID:110594336	NC_000001.11	31431800	31432000	Ensembl104_CTCF_binding_site:ENSR00000352770	13	13	200	1	0.065
NC_000001.11	31431925	31431938	RefSeqFE_nucleotide_motif_GeneID:110594336	NC_000001.11	31412637	31453860	dbSUPER_Colon_Crypt_1_SE_23283	13	13	41223	1	0.000315358
NC_000001.11	31431943	31431956	RefSeqFE_nucleotide_motif_GeneID:110594336	NC_000001.11	31431597	31432306	Ensembl104_promoter_flanking_region:ENSR00000922121	13	13	709	1	0.0183357
NC_000001.11	31431943	31431956	RefSeqFE_nucleotide_motif_GeneID:110594336	NC_000001.11	31431800	31432000	Ensembl104_CTCF_binding_site:ENSR00000352770	13	13	200	1	0.065
NC_000001.11	31431943	31431956	RefSeqFE_nucleotide_motif_GeneID:110594336	NC_000001.11	31412637	31453860	dbSUPER_Colon_Crypt_1_SE_23283	13	13	41223	1	0.000315358
NC_000001.11	31431961	31431974	RefSeqFE_nucleotide_motif_GeneID:110594336	NC_000001.11	31431597	31432306	Ensembl104_promoter_flanking_region:ENSR00000922121	13	13	709	1	0.0183357
NC_000001.11	31431961	31431974	RefSeqFE_nucleotide_motif_GeneID:110594336	NC_000001.11	31431800	31432000	Ensembl104_CTCF_binding_site:ENSR00000352770	13	13	200	1	0.065
NC_000001.11	31431961	31431974	RefSeqFE_nucleotide_motif_GeneID:110594336	NC_000001.11	31412637	31453860	dbSUPER_Colon_Crypt_1_SE_23283	13	13	41223	1	0.000315358
NC_000001.11	31431979	31431992	RefSeqFE_nucleotide_motif_GeneID:110594336	NC_000001.11	31431597	31432306	Ensembl104_promoter_flanking_region:ENSR00000922121	13	13	709	1	0.0183357
NC_000001.11	31431979	31431992	RefSeqFE_nucleotide_motif_GeneID:110594336	NC_000001.11	31431800	31432000	Ensembl104_CTCF_binding_site:ENSR00000352770	13	13	200	1	0.065
NC_000001.11	31431979	31431992	RefSeqFE_nucleotide_motif_GeneID:110594336	NC_000001.11	31412637	31453860	dbSUPER_Colon_Crypt_1_SE_23283	13	13	41223	1	0.000315358
NC_000001.11	31431997	31432010	RefSeqFE_nucleotide_motif_GeneID:110594336	NC_000001.11	31431597	31432306	Ensembl104_promoter_flanking_region:ENSR00000922121	13	13	709	1	0.0183357
NC_000001.11	31431997	31432010	RefSeqFE_nucleotide_motif_GeneID:110594336	NC_000001.11	31431800	31432000	Ensembl104_CTCF_binding_site:ENSR00000352770	3	13	200	0.230769	0.015
NC_000001.11	31431997	31432010	RefSeqFE_nucleotide_motif_GeneID:110594336	NC_000001.11	31412637	31453860	dbSUPER_Colon_Crypt_1_SE_23283	13	13	41223	1	0.000315358
NC_000001.11	31432015	31432028	RefSeqFE_nucleotide_motif_GeneID:110594336	NC_000001.11	31431597	31432306	Ensembl104_promoter_flanking_region:ENSR00000922121	13	13	709	1	0.0183357
NC_000001.11	31432015	31432028	RefSeqFE_nucleotide_motif_GeneID:110594336	NC_000001.11	31432012	31432207	ENCODEcCRE_EH38E1334118_distal_enhancer	13	13	195	1	0.0666667
NC_000001.11	31432015	31432028	RefSeqFE_nucleotide_motif_GeneID:110594336	NC_000001.11	31412637	31453860	dbSUPER_Colon_Crypt_1_SE_23283	13	13	41223	1	0.000315358
NC_000001.11	31432033	31432046	RefSeqFE_nucleotide_motif_GeneID:110594336	NC_000001.11	31431597	31432306	Ensembl104_promoter_flanking_region:ENSR00000922121	13	13	709	1	0.0183357
NC_000001.11	31432033	31432046	RefSeqFE_nucleotide_motif_GeneID:110594336	NC_000001.11	31432012	31432207	ENCODEcCRE_EH38E1334118_distal_enhancer	13	13	195	1	0.0666667
NC_000001.11	31432033	31432046	RefSeqFE_nucleotide_motif_GeneID:110594336	NC_000001.11	31412637	31453860	dbSUPER_Colon_Crypt_1_SE_23283	13	13	41223	1	0.000315358
NC_000001.11	31432051	31432064	RefSeqFE_nucleotide_motif_GeneID:110594336	NC_000001.11	31431597	31432306	Ensembl104_promoter_flanking_region:ENSR00000922121	13	13	709	1	0.0183357
NC_000001.11	31432051	31432064	RefSeqFE_nucleotide_motif_GeneID:110594336	NC_000001.11	31432012	31432207	ENCODEcCRE_EH38E1334118_distal_enhancer	13	13	195	1	0.0666667
NC_000001.11	31432051	31432064	RefSeqFE_nucleotide_motif_GeneID:110594336	NC_000001.11	31412637	31453860	dbSUPER_Colon_Crypt_1_SE_23283	13	13	41223	1	0.000315358
NC_000001.11	31432069	31432082	RefSeqFE_nucleotide_motif_GeneID:110594336	NC_000001.11	31431597	31432306	Ensembl104_promoter_flanking_region:ENSR00000922121	13	13	709	1	0.0183357
NC_000001.11	31432069	31432082	RefSeqFE_nucleotide_motif_GeneID:110594336	NC_000001.11	31432012	31432207	ENCODEcCRE_EH38E1334118_distal_enhancer	13	13	195	1	0.0666667
NC_000001.11	31432069	31432082	RefSeqFE_nucleotide_motif_GeneID:110594336	NC_000001.11	31412637	31453860	dbSUPER_Colon_Crypt_1_SE_23283	13	13	41223	1	0.000315358
NC_000001.11	31432087	31432100	RefSeqFE_nucleotide_motif_GeneID:110594336	NC_000001.11	31431597	31432306	Ensembl104_promoter_flanking_region:ENSR00000922121	13	13	709	1	0.0183357
NC_000001.11	31432087	31432100	RefSeqFE_nucleotide_motif_GeneID:110594336	NC_000001.11	31432012	31432207	ENCODEcCRE_EH38E1334118_distal_enhancer	13	13	195	1	0.0666667
NC_000001.11	31432087	31432100	RefSeqFE_nucleotide_motif_GeneID:110594336	NC_000001.11	31412637	31453860	dbSUPER_Colon_Crypt_1_SE_23283	13	13	41223	1	0.000315358
NC_000001.11	31432105	31432118	RefSeqFE_nucleotide_motif_GeneID:110594336	NC_000001.11	31431597	31432306	Ensembl104_promoter_flanking_region:ENSR00000922121	13	13	709	1	0.0183357
NC_000001.11	31432105	31432118	RefSeqFE_nucleotide_motif_GeneID:110594336	NC_000001.11	31432012	31432207	ENCODEcCRE_EH38E1334118_distal_enhancer	13	13	195	1	0.0666667
NC_000001.11	31432105	31432118	RefSeqFE_nucleotide_motif_GeneID:110594336	NC_000001.11	31412637	31453860	dbSUPER_Colon_Crypt_1_SE_23283	13	13	41223	1	0.000315358
NC_000001.11	31432123	31432136	RefSeqFE_nucleotide_motif_GeneID:110594336	NC_000001.11	31431597	31432306	Ensembl104_promoter_flanking_region:ENSR00000922121	13	13	709	1	0.0183357
NC_000001.11	31432123	31432136	RefSeqFE_nucleotide_motif_GeneID:110594336	NC_000001.11	31432012	31432207	ENCODEcCRE_EH38E1334118_distal_enhancer	13	13	195	1	0.0666667
NC_000001.11	31432123	31432136	RefSeqFE_nucleotide_motif_GeneID:110594336	NC_000001.11	31412637	31453860	dbSUPER_Colon_Crypt_1_SE_23283	13	13	41223	1	0.000315358
NC_000001.11	31432141	31432154	RefSeqFE_nucleotide_motif_GeneID:110594336	NC_000001.11	31431597	31432306	Ensembl104_promoter_flanking_region:ENSR00000922121	13	13	709	1	0.0183357
NC_000001.11	31432141	31432154	RefSeqFE_nucleotide_motif_GeneID:110594336	NC_000001.11	31432012	31432207	ENCODEcCRE_EH38E1334118_distal_enhancer	13	13	195	1	0.0666667
NC_000001.11	31432141	31432154	RefSeqFE_nucleotide_motif_GeneID:110594336	NC_000001.11	31412637	31453860	dbSUPER_Colon_Crypt_1_SE_23283	13	13	41223	1	0.000315358
NC_000001.11	31432159	31432172	RefSeqFE_nucleotide_motif_GeneID:110594336	NC_000001.11	31431597	31432306	Ensembl104_promoter_flanking_region:ENSR00000922121	13	13	709	1	0.0183357
NC_000001.11	31432159	31432172	RefSeqFE_nucleotide_motif_GeneID:110594336	NC_000001.11	31432012	31432207	ENCODEcCRE_EH38E1334118_distal_enhancer	13	13	195	1	0.0666667
NC_000001.11	31432159	31432172	RefSeqFE_nucleotide_motif_GeneID:110594336	NC_000001.11	31412637	31453860	dbSUPER_Colon_Crypt_1_SE_23283	13	13	41223	1	0.000315358
NC_000001.11	31432177	31432190	RefSeqFE_nucleotide_motif_GeneID:110594336	NC_000001.11	31431597	31432306	Ensembl104_promoter_flanking_region:ENSR00000922121	13	13	709	1	0.0183357
NC_000001.11	31432177	31432190	RefSeqFE_nucleotide_motif_GeneID:110594336	NC_000001.11	31432012	31432207	ENCODEcCRE_EH38E1334118_distal_enhancer	13	13	195	1	0.0666667
NC_000001.11	31432177	31432190	RefSeqFE_nucleotide_motif_GeneID:110594336	NC_000001.11	31412637	31453860	dbSUPER_Colon_Crypt_1_SE_23283	13	13	41223	1	0.000315358
NC_000001.11	31432204	31432217	RefSeqFE_nucleotide_motif_GeneID:110594336	NC_000001.11	31431597	31432306	Ensembl104_promoter_flanking_region:ENSR00000922121	13	13	709	1	0.0183357
NC_000001.11	31432204	31432217	RefSeqFE_nucleotide_motif_GeneID:110594336	NC_000001.11	31432012	31432207	ENCODEcCRE_EH38E1334118_distal_enhancer	3	13	195	0.230769	0.0153846
NC_000001.11	31432204	31432217	RefSeqFE_nucleotide_motif_GeneID:110594336	NC_000001.11	31412637	31453860	dbSUPER_Colon_Crypt_1_SE_23283	13	13	41223	1	0.000315358
NC_000001.11	31715167	31715462	RefSeqFE_enhancer_GeneID:112577582	NC_000001.11	31714000	31716600	Ensembl104_CTCF_binding_site:ENSR00000352849	295	295	2600	1	0.113462
NC_000001.11	31715167	31715462	RefSeqFE_enhancer_GeneID:112577582	NC_000001.11	31715002	31715385	FANTOM5_enhancer_chr1:31715002-31715385	218	295	383	0.738983	0.569191
NC_000001.11	31715167	31715462	RefSeqFE_enhancer_GeneID:112577582	NC_000001.11	31715010	31715359	ENCODEcCRE_EH38E1334433_distal_enhancer	192	295	349	0.650847	0.550143
NC_000001.11	31715167	31715462	RefSeqFE_enhancer_GeneID:112577582	NC_000001.11	31687396	31716188	dbSUPER_Ovary_SE_46800	295	295	28792	1	0.0102459
NC_000001.11	31715167	31715462	RefSeqFE_enhancer_GeneID:112577582	NC_000001.11	31688442	31716105	dbSUPER_NHLF_SE_45258	295	295	27663	1	0.0106641
NC_000001.11	31715167	31715462	RefSeqFE_enhancer_GeneID:112577582	NC_000001.11	31688713	31716041	dbSUPER_u87_SE_56472	295	295	27328	1	0.0107948
NC_000001.11	31715167	31715462	RefSeqFE_enhancer_GeneID:112577582	NC_000001.11	31688983	31716183	dbSUPER_HSMMtube_SE_37841	295	295	27200	1	0.0108456
NC_000001.11	31715167	31715462	RefSeqFE_enhancer_GeneID:112577582	NC_000001.11	31689013	31716083	dbSUPER_Osteoblasts_SE_46488	295	295	27070	1	0.0108977
NC_000001.11	31715167	31715462	RefSeqFE_enhancer_GeneID:112577582	NC_000001.11	31690516	31717428	dbSUPER_Brain_Hippocampus_Middle_SE_06381	295	295	26912	1	0.0109617
NC_000001.11	31715167	31715462	RefSeqFE_enhancer_GeneID:112577582	NC_000001.11	31698944	31716208	dbSUPER_Aorta_SE_02054	295	295	17264	1	0.0170876
NC_000001.11	31715167	31715462	RefSeqFE_enhancer_GeneID:112577582	NC_000001.11	31700446	31716222	dbSUPER_Fetal_Muscle_SE_30826	295	295	15776	1	0.0186993
NC_000001.11	31955825	31956433	RefSeqFE_enhancer_GeneID:108254669	NC_000001.11	31956000	31956343	ENCODEcCRE_EH38E1334689_distal_enhancer	343	608	343	0.564145	1
NC_000001.11	31955825	31956433	RefSeqFE_enhancer_GeneID:108254669	NC_000001.11	31956000	31956400	Ensembl104_CTCF_binding_site:ENSR00000352929	400	608	400	0.657895	1
NC_000001.11	31955825	31956433	RefSeqFE_enhancer_GeneID:108254669	NC_000001.11	31956391	31956571	ENCODEcCRE_EH38E1334690_distal_enhancer	42	608	180	0.0690789	0.233333
NC_000001.11	31955825	31956433	RefSeqFE_enhancer_GeneID:108254669	NC_000001.11	31866005	31964726	dbSUPER_Ly4_SE_59623	608	608	98721	1	0.00615877
NC_000001.11	31955825	31956433	RefSeqFE_enhancer_GeneID:108254669	NC_000001.11	31879686	31962862	dbSUPER_CD20_SE_11611	608	608	83176	1	0.0073098
NC_000001.11	31955825	31956433	RefSeqFE_enhancer_GeneID:108254669	NC_000001.11	31903644	31962784	dbSUPER_CD14_SE_09496	608	608	59140	1	0.0102807
NC_000001.11	31955825	31956433	RefSeqFE_enhancer_GeneID:108254669	NC_000001.11	31904557	31961115	dbSUPER_Adipose_Nuclei_SE_00185	608	608	56558	1	0.01075
NC_000001.11	31955825	31956433	RefSeqFE_enhancer_GeneID:108254669	NC_000001.11	31904857	31958716	dbSUPER_CD4p_CD25-_Il17-_PMAstim_Th_SE_18474	608	608	53859	1	0.0112887
NC_000001.11	31955825	31956433	RefSeqFE_enhancer_GeneID:108254669	NC_000001.11	31905965	31965012	dbSUPER_Brain_Cingulate_Gyrus_SE_05505	608	608	59047	1	0.0102969
NC_000001.11	31955825	31956433	RefSeqFE_enhancer_GeneID:108254669	NC_000001.11	31910344	31958695	dbSUPER_CD4p_CD25-_CD45ROp_Memory_SE_18176	608	608	48351	1	0.0125747
NC_000001.11	31955825	31956433	RefSeqFE_enhancer_GeneID:108254669	NC_000001.11	31910477	31958523	dbSUPER_CD8_primary_SE_22706	608	608	48046	1	0.0126545
NC_000001.11	31955825	31956433	RefSeqFE_enhancer_GeneID:108254669	NC_000001.11	31910481	31962520	dbSUPER_Tonsil_SE_62431	608	608	52039	1	0.0116835
NC_000001.11	31955825	31956433	RefSeqFE_enhancer_GeneID:108254669	NC_000001.11	31910859	31958512	dbSUPER_CD4_Memory_Primary_7pool_SE_14567	608	608	47653	1	0.0127589
NC_000001.11	31955825	31956433	RefSeqFE_enhancer_GeneID:108254669	NC_000001.11	31911220	31958439	dbSUPER_CD3_SE_12303	608	608	47219	1	0.0128762
NC_000001.11	31955825	31956433	RefSeqFE_enhancer_GeneID:108254669	NC_000001.11	31912030	31962855	dbSUPER_GM12878_SE_32591	608	608	50825	1	0.0119626
NC_000001.11	31955825	31956433	RefSeqFE_enhancer_GeneID:108254669	NC_000001.11	31912294	31958325	dbSUPER_CD4p_CD25-_Il17p_PMAstim_Th17_SE_19618	608	608	46031	1	0.0132085
NC_000001.11	31955825	31956433	RefSeqFE_enhancer_GeneID:108254669	NC_000001.11	31920676	31956809	dbSUPER_Fetal_Intestine_SE_28018	608	608	36133	1	0.0168267
NC_000001.11	31955825	31956433	RefSeqFE_enhancer_GeneID:108254669	NC_000001.11	31920792	31964790	dbSUPER_DND41_SE_25437	608	608	43998	1	0.0138188
NC_000001.11	31955825	31956433	RefSeqFE_enhancer_GeneID:108254669	NC_000001.11	31920816	31957029	dbSUPER_Fetal_Intestine_Large_SE_29138	608	608	36213	1	0.0167896
NC_000001.11	31955825	31956433	RefSeqFE_enhancer_GeneID:108254669	NC_000001.11	31920979	31962352	dbSUPER_Fetal_Thymus_SE_31027	608	608	41373	1	0.0146956
NC_000001.11	31955825	31956433	RefSeqFE_enhancer_GeneID:108254669	NC_000001.11	31921367	31958520	dbSUPER_Skeletal_Muscle_SE_51637	608	608	37153	1	0.0163648
NC_000001.11	31955825	31956433	RefSeqFE_enhancer_GeneID:108254669	NC_000001.11	31922388	31962260	dbSUPER_Thymus_SE_55181	608	608	39872	1	0.0152488
NC_000001.11	31955825	31956433	RefSeqFE_enhancer_GeneID:108254669	NC_000001.11	31923439	31956807	dbSUPER_HCT-116_SE_34572	608	608	33368	1	0.0182211
NC_000001.11	31955825	31956433	RefSeqFE_enhancer_GeneID:108254669	NC_000001.11	31923523	31962330	dbSUPER_Jurkat_SE_39509	608	608	38807	1	0.0156673
NC_000001.11	31955825	31956433	RefSeqFE_enhancer_GeneID:108254669	NC_000001.11	31923548	31958220	dbSUPER_Gastric_SE_31788	608	608	34672	1	0.0175358
NC_000001.11	31955825	31956433	RefSeqFE_enhancer_GeneID:108254669	NC_000001.11	31923580	31956639	dbSUPER_Pancreas_SE_47857	608	608	33059	1	0.0183914
NC_000001.11	31955825	31956433	RefSeqFE_enhancer_GeneID:108254669	NC_000001.11	31923831	31958714	dbSUPER_CD8_Memory_7pool_SE_20913	608	608	34883	1	0.0174297
NC_000001.11	31955825	31956433	RefSeqFE_enhancer_GeneID:108254669	NC_000001.11	31923928	31958464	dbSUPER_CD34_Primary_RO01536_SE_13610	608	608	34536	1	0.0176048
NC_000001.11	31955825	31956433	RefSeqFE_enhancer_GeneID:108254669	NC_000001.11	31926646	31958384	dbSUPER_Small_Intestine_SE_52642	608	608	31738	1	0.0191568
NC_000001.11	31955825	31956433	RefSeqFE_enhancer_GeneID:108254669	NC_000001.11	31926647	31956732	dbSUPER_Right_Atrium_SE_49021	608	608	30085	1	0.0202094
NC_000001.11	31955825	31956433	RefSeqFE_enhancer_GeneID:108254669	NC_000001.11	31927138	31958218	dbSUPER_K562_SE_39960	608	608	31080	1	0.0195624
NC_000001.11	31955825	31956433	RefSeqFE_enhancer_GeneID:108254669	NC_000001.11	31927343	31958388	dbSUPER_Spleen_SE_53748	608	608	31045	1	0.0195845
NC_000001.11	31955825	31956433	RefSeqFE_enhancer_GeneID:108254669	NC_000001.11	31928283	31956751	dbSUPER_Sigmoid_Colon_SE_50456	608	608	28468	1	0.0213573
NC_000001.11	31955825	31956433	RefSeqFE_enhancer_GeneID:108254669	NC_000001.11	31928626	31956970	dbSUPER_Left_Ventricle_SE_41137	608	608	28344	1	0.0214507
NC_000001.11	31955825	31956433	RefSeqFE_enhancer_GeneID:108254669	NC_000001.11	31930194	31956833	dbSUPER_HUVEC_SE_38810	608	608	26639	1	0.0228237
NC_000001.11	31955825	31956433	RefSeqFE_enhancer_GeneID:108254669	NC_000001.11	31930289	31957140	dbSUPER_Duodenum_Smooth_Muscle_SE_26248	608	608	26851	1	0.0226435
NC_000001.11	31955825	31956433	RefSeqFE_enhancer_GeneID:108254669	NC_000001.11	31930306	31957100	dbSUPER_Osteoblasts_SE_46136	608	608	26794	1	0.0226916
NC_000001.11	31955825	31956433	RefSeqFE_enhancer_GeneID:108254669	NC_000001.11	31930378	31956868	dbSUPER_Panc1_SE_47391	608	608	26490	1	0.0229521
NC_000001.11	31955825	31956433	RefSeqFE_enhancer_GeneID:108254669	NC_000001.11	31930535	31957278	dbSUPER_HSMMtube_SE_37823	608	608	26743	1	0.0227349
NC_000001.11	31955825	31956433	RefSeqFE_enhancer_GeneID:108254669	NC_000001.11	31930724	31956783	dbSUPER_Fetal_Muscle_SE_30289	608	608	26059	1	0.0233317
NC_000001.11	31955825	31956433	RefSeqFE_enhancer_GeneID:108254669	NC_000001.11	31930739	31964746	dbSUPER_HeLa_SE_34675	608	608	34007	1	0.0178787
NC_000001.11	31955825	31956433	RefSeqFE_enhancer_GeneID:108254669	NC_000001.11	31930801	31957017	dbSUPER_u87_SE_56686	608	608	26216	1	0.0231919
NC_000001.11	31955825	31956433	RefSeqFE_enhancer_GeneID:108254669	NC_000001.11	31931201	31956772	dbSUPER_NHEK_SE_64663	608	608	25571	1	0.0237769
NC_000001.11	31955825	31956433	RefSeqFE_enhancer_GeneID:108254669	NC_000001.11	31932370	31958197	dbSUPER_Lung_SE_42547	608	608	25827	1	0.0235413
NC_000001.11	31955825	31956433	RefSeqFE_enhancer_GeneID:108254669	NC_000001.11	31932417	31956759	dbSUPER_NHLF_SE_45230	608	608	24342	1	0.0249774
NC_000001.11	31955825	31956433	RefSeqFE_enhancer_GeneID:108254669	NC_000001.11	31933013	31956764	dbSUPER_Bladder_SE_03010	608	608	23751	1	0.0255989
NC_000001.11	31955825	31956433	RefSeqFE_enhancer_GeneID:108254669	NC_000001.11	31934791	31956648	dbSUPER_Colon_Crypt_3_SE_25246	608	608	21857	1	0.0278172
NC_000001.11	31955825	31956433	RefSeqFE_enhancer_GeneID:108254669	NC_000001.11	31934811	31957244	dbSUPER_Esophagus_SE_27326	608	608	22433	1	0.0271029
NC_000001.11	31955825	31956433	RefSeqFE_enhancer_GeneID:108254669	NC_000001.11	31935145	31956811	dbSUPER_Adrenal_Gland_SE_01455	608	608	21666	1	0.0280624
NC_000001.11	31955825	31956433	RefSeqFE_enhancer_GeneID:108254669	NC_000001.11	31935197	31956617	dbSUPER_Colon_Crypt_2_SE_24317	608	608	21420	1	0.0283847
NC_000001.11	31955825	31956433	RefSeqFE_enhancer_GeneID:108254669	NC_000001.11	31943757	31956876	dbSUPER_IMR90_SE_39284	608	608	13119	1	0.046345
NC_000001.11	31956020	31956495	RefSeqFE_CAGE_cluster_GeneID:108254669	NC_000001.11	31956000	31956343	ENCODEcCRE_EH38E1334689_distal_enhancer	323	475	343	0.68	0.941691
NC_000001.11	31956020	31956495	RefSeqFE_CAGE_cluster_GeneID:108254669	NC_000001.11	31956000	31956400	Ensembl104_CTCF_binding_site:ENSR00000352929	380	475	400	0.8	0.95
NC_000001.11	31956020	31956495	RefSeqFE_CAGE_cluster_GeneID:108254669	NC_000001.11	31956391	31956571	ENCODEcCRE_EH38E1334690_distal_enhancer	104	475	180	0.218947	0.577778
NC_000001.11	31956020	31956495	RefSeqFE_CAGE_cluster_GeneID:108254669	NC_000001.11	31866005	31964726	dbSUPER_Ly4_SE_59623	475	475	98721	1	0.00481154
NC_000001.11	31956020	31956495	RefSeqFE_CAGE_cluster_GeneID:108254669	NC_000001.11	31879686	31962862	dbSUPER_CD20_SE_11611	475	475	83176	1	0.00571078
NC_000001.11	31956020	31956495	RefSeqFE_CAGE_cluster_GeneID:108254669	NC_000001.11	31903644	31962784	dbSUPER_CD14_SE_09496	475	475	59140	1	0.00803179
NC_000001.11	31956020	31956495	RefSeqFE_CAGE_cluster_GeneID:108254669	NC_000001.11	31904557	31961115	dbSUPER_Adipose_Nuclei_SE_00185	475	475	56558	1	0.00839846
NC_000001.11	31956020	31956495	RefSeqFE_CAGE_cluster_GeneID:108254669	NC_000001.11	31904857	31958716	dbSUPER_CD4p_CD25-_Il17-_PMAstim_Th_SE_18474	475	475	53859	1	0.00881932
NC_000001.11	31956020	31956495	RefSeqFE_CAGE_cluster_GeneID:108254669	NC_000001.11	31905965	31965012	dbSUPER_Brain_Cingulate_Gyrus_SE_05505	475	475	59047	1	0.00804444
NC_000001.11	31956020	31956495	RefSeqFE_CAGE_cluster_GeneID:108254669	NC_000001.11	31910344	31958695	dbSUPER_CD4p_CD25-_CD45ROp_Memory_SE_18176	475	475	48351	1	0.009824
NC_000001.11	31956020	31956495	RefSeqFE_CAGE_cluster_GeneID:108254669	NC_000001.11	31910477	31958523	dbSUPER_CD8_primary_SE_22706	475	475	48046	1	0.00988636
NC_000001.11	31956020	31956495	RefSeqFE_CAGE_cluster_GeneID:108254669	NC_000001.11	31910481	31962520	dbSUPER_Tonsil_SE_62431	475	475	52039	1	0.00912777
NC_000001.11	31956020	31956495	RefSeqFE_CAGE_cluster_GeneID:108254669	NC_000001.11	31910859	31958512	dbSUPER_CD4_Memory_Primary_7pool_SE_14567	475	475	47653	1	0.00996789
NC_000001.11	31956020	31956495	RefSeqFE_CAGE_cluster_GeneID:108254669	NC_000001.11	31911220	31958439	dbSUPER_CD3_SE_12303	475	475	47219	1	0.0100595
NC_000001.11	31956020	31956495	RefSeqFE_CAGE_cluster_GeneID:108254669	NC_000001.11	31912030	31962855	dbSUPER_GM12878_SE_32591	475	475	50825	1	0.00934579
NC_000001.11	31956020	31956495	RefSeqFE_CAGE_cluster_GeneID:108254669	NC_000001.11	31912294	31958325	dbSUPER_CD4p_CD25-_Il17p_PMAstim_Th17_SE_19618	475	475	46031	1	0.0103191
NC_000001.11	31956020	31956495	RefSeqFE_CAGE_cluster_GeneID:108254669	NC_000001.11	31920676	31956809	dbSUPER_Fetal_Intestine_SE_28018	475	475	36133	1	0.0131459
NC_000001.11	31956020	31956495	RefSeqFE_CAGE_cluster_GeneID:108254669	NC_000001.11	31920792	31964790	dbSUPER_DND41_SE_25437	475	475	43998	1	0.0107959
NC_000001.11	31956020	31956495	RefSeqFE_CAGE_cluster_GeneID:108254669	NC_000001.11	31920816	31957029	dbSUPER_Fetal_Intestine_Large_SE_29138	475	475	36213	1	0.0131168
NC_000001.11	31956020	31956495	RefSeqFE_CAGE_cluster_GeneID:108254669	NC_000001.11	31920979	31962352	dbSUPER_Fetal_Thymus_SE_31027	475	475	41373	1	0.0114809
NC_000001.11	31956020	31956495	RefSeqFE_CAGE_cluster_GeneID:108254669	NC_000001.11	31921367	31958520	dbSUPER_Skeletal_Muscle_SE_51637	475	475	37153	1	0.012785
NC_000001.11	31956020	31956495	RefSeqFE_CAGE_cluster_GeneID:108254669	NC_000001.11	31922388	31962260	dbSUPER_Thymus_SE_55181	475	475	39872	1	0.0119131
NC_000001.11	31956020	31956495	RefSeqFE_CAGE_cluster_GeneID:108254669	NC_000001.11	31923439	31956807	dbSUPER_HCT-116_SE_34572	475	475	33368	1	0.0142352
NC_000001.11	31956020	31956495	RefSeqFE_CAGE_cluster_GeneID:108254669	NC_000001.11	31923523	31962330	dbSUPER_Jurkat_SE_39509	475	475	38807	1	0.0122401
NC_000001.11	31956020	31956495	RefSeqFE_CAGE_cluster_GeneID:108254669	NC_000001.11	31923548	31958220	dbSUPER_Gastric_SE_31788	475	475	34672	1	0.0136998
NC_000001.11	31956020	31956495	RefSeqFE_CAGE_cluster_GeneID:108254669	NC_000001.11	31923580	31956639	dbSUPER_Pancreas_SE_47857	475	475	33059	1	0.0143683
NC_000001.11	31956020	31956495	RefSeqFE_CAGE_cluster_GeneID:108254669	NC_000001.11	31923831	31958714	dbSUPER_CD8_Memory_7pool_SE_20913	475	475	34883	1	0.0136169
NC_000001.11	31956020	31956495	RefSeqFE_CAGE_cluster_GeneID:108254669	NC_000001.11	31923928	31958464	dbSUPER_CD34_Primary_RO01536_SE_13610	475	475	34536	1	0.0137538
NC_000001.11	31956020	31956495	RefSeqFE_CAGE_cluster_GeneID:108254669	NC_000001.11	31926646	31958384	dbSUPER_Small_Intestine_SE_52642	475	475	31738	1	0.0149663
NC_000001.11	31956020	31956495	RefSeqFE_CAGE_cluster_GeneID:108254669	NC_000001.11	31926647	31956732	dbSUPER_Right_Atrium_SE_49021	475	475	30085	1	0.0157886
NC_000001.11	31956020	31956495	RefSeqFE_CAGE_cluster_GeneID:108254669	NC_000001.11	31927138	31958218	dbSUPER_K562_SE_39960	475	475	31080	1	0.0152831
NC_000001.11	31956020	31956495	RefSeqFE_CAGE_cluster_GeneID:108254669	NC_000001.11	31927343	31958388	dbSUPER_Spleen_SE_53748	475	475	31045	1	0.0153004
NC_000001.11	31956020	31956495	RefSeqFE_CAGE_cluster_GeneID:108254669	NC_000001.11	31928283	31956751	dbSUPER_Sigmoid_Colon_SE_50456	475	475	28468	1	0.0166854
NC_000001.11	31956020	31956495	RefSeqFE_CAGE_cluster_GeneID:108254669	NC_000001.11	31928626	31956970	dbSUPER_Left_Ventricle_SE_41137	475	475	28344	1	0.0167584
NC_000001.11	31956020	31956495	RefSeqFE_CAGE_cluster_GeneID:108254669	NC_000001.11	31930194	31956833	dbSUPER_HUVEC_SE_38810	475	475	26639	1	0.017831
NC_000001.11	31956020	31956495	RefSeqFE_CAGE_cluster_GeneID:108254669	NC_000001.11	31930289	31957140	dbSUPER_Duodenum_Smooth_Muscle_SE_26248	475	475	26851	1	0.0176902
NC_000001.11	31956020	31956495	RefSeqFE_CAGE_cluster_GeneID:108254669	NC_000001.11	31930306	31957100	dbSUPER_Osteoblasts_SE_46136	475	475	26794	1	0.0177278
NC_000001.11	31956020	31956495	RefSeqFE_CAGE_cluster_GeneID:108254669	NC_000001.11	31930378	31956868	dbSUPER_Panc1_SE_47391	475	475	26490	1	0.0179313
NC_000001.11	31956020	31956495	RefSeqFE_CAGE_cluster_GeneID:108254669	NC_000001.11	31930535	31957278	dbSUPER_HSMMtube_SE_37823	475	475	26743	1	0.0177617
NC_000001.11	31956020	31956495	RefSeqFE_CAGE_cluster_GeneID:108254669	NC_000001.11	31930724	31956783	dbSUPER_Fetal_Muscle_SE_30289	475	475	26059	1	0.0182279
NC_000001.11	31956020	31956495	RefSeqFE_CAGE_cluster_GeneID:108254669	NC_000001.11	31930739	31964746	dbSUPER_HeLa_SE_34675	475	475	34007	1	0.0139677
NC_000001.11	31956020	31956495	RefSeqFE_CAGE_cluster_GeneID:108254669	NC_000001.11	31930801	31957017	dbSUPER_u87_SE_56686	475	475	26216	1	0.0181187
NC_000001.11	31956020	31956495	RefSeqFE_CAGE_cluster_GeneID:108254669	NC_000001.11	31931201	31956772	dbSUPER_NHEK_SE_64663	475	475	25571	1	0.0185757
NC_000001.11	31956020	31956495	RefSeqFE_CAGE_cluster_GeneID:108254669	NC_000001.11	31932370	31958197	dbSUPER_Lung_SE_42547	475	475	25827	1	0.0183916
NC_000001.11	31956020	31956495	RefSeqFE_CAGE_cluster_GeneID:108254669	NC_000001.11	31932417	31956759	dbSUPER_NHLF_SE_45230	475	475	24342	1	0.0195136
NC_000001.11	31956020	31956495	RefSeqFE_CAGE_cluster_GeneID:108254669	NC_000001.11	31933013	31956764	dbSUPER_Bladder_SE_03010	475	475	23751	1	0.0199992
NC_000001.11	31956020	31956495	RefSeqFE_CAGE_cluster_GeneID:108254669	NC_000001.11	31934791	31956648	dbSUPER_Colon_Crypt_3_SE_25246	475	475	21857	1	0.0217322
NC_000001.11	31956020	31956495	RefSeqFE_CAGE_cluster_GeneID:108254669	NC_000001.11	31934811	31957244	dbSUPER_Esophagus_SE_27326	475	475	22433	1	0.0211742
NC_000001.11	31956020	31956495	RefSeqFE_CAGE_cluster_GeneID:108254669	NC_000001.11	31935145	31956811	dbSUPER_Adrenal_Gland_SE_01455	475	475	21666	1	0.0219238
NC_000001.11	31956020	31956495	RefSeqFE_CAGE_cluster_GeneID:108254669	NC_000001.11	31935197	31956617	dbSUPER_Colon_Crypt_2_SE_24317	475	475	21420	1	0.0221755
NC_000001.11	31956020	31956495	RefSeqFE_CAGE_cluster_GeneID:108254669	NC_000001.11	31943757	31956876	dbSUPER_IMR90_SE_39284	475	475	13119	1	0.036207
NC_000001.11	32044428	32045312	RefSeqFE_enhancer_GeneID:110120729	NC_000001.11	32044428	32045312	VISTA_enhancer_positive_hs645	884	884	884	1	1
NC_000001.11	32044428	32045312	RefSeqFE_enhancer_GeneID:110120729	NC_000001.11	32045000	32046599	Ensembl104_promoter_flanking_region:ENSR00000352951	312	884	1599	0.352941	0.195122
NC_000001.11	32062467	32062762	RefSeqFE_enhancer_GeneID:112577583	NC_000001.11	32062538	32062880	ENCODEcCRE_EH38E1334765_distal_enhancer	224	295	342	0.759322	0.654971
NC_000001.11	32725227	32725522	RefSeqFE_enhancer_GeneID:112577584	NC_000001.11	32724799	32725401	Ensembl104_promoter:ENSR00000353102	174	295	602	0.589831	0.289037
NC_000001.11	32725227	32725522	RefSeqFE_enhancer_GeneID:112577584	NC_000001.11	32725171	32725521	ENCODEcCRE_EH38E1335263_promoter	294	295	350	0.99661	0.84
NC_000001.11	32725227	32725522	RefSeqFE_enhancer_GeneID:112577584	NC_000001.11	32683833	32776134	dbSUPER_Esophagus_SE_26629	295	295	92301	1	0.00319607
NC_000001.11	32725227	32725522	RefSeqFE_enhancer_GeneID:112577584	NC_000001.11	32695110	32774688	dbSUPER_LNCaP_SE_41588	295	295	79578	1	0.00370705
NC_000001.11	32725227	32725522	RefSeqFE_enhancer_GeneID:112577584	NC_000001.11	32711959	32774849	dbSUPER_Pancreatic_islets_SE_65538	295	295	62890	1	0.00469073
NC_000001.11	32725227	32725522	RefSeqFE_enhancer_GeneID:112577584	NC_000001.11	32712427	32768358	dbSUPER_Colon_Crypt_1_SE_23116	295	295	55931	1	0.00527436
NC_000001.11	32725227	32725522	RefSeqFE_enhancer_GeneID:112577584	NC_000001.11	32712428	32776097	dbSUPER_Adrenal_Gland_SE_00938	295	295	63669	1	0.00463334
NC_000001.11	33363187	33365346	RefSeqFE_enhancer_GeneID:110121088	NC_000001.11	33363100	33363319	ENCODEcCRE_EH38E1335917_distal_enhancer	132	2159	219	0.0611394	0.60274
NC_000001.11	33363187	33365346	RefSeqFE_enhancer_GeneID:110121088	NC_000001.11	33363187	33365346	VISTA_enhancer_positive_hs1388	2159	2159	2159	1	1
NC_000001.11	33363187	33365346	RefSeqFE_enhancer_GeneID:110121088	NC_000001.11	33363400	33363717	ENCODEcCRE_EH38E1335918_distal_enhancer	317	2159	317	0.146827	1
NC_000001.11	33363187	33365346	RefSeqFE_enhancer_GeneID:110121088	NC_000001.11	33363912	33364280	FANTOM5_enhancer_chr1:33363912-33364280	368	2159	368	0.170449	1
NC_000001.11	33363187	33365346	RefSeqFE_enhancer_GeneID:110121088	NC_000001.11	33363996	33364344	ENCODEcCRE_EH38E1335919_distal_enhancer	348	2159	348	0.161186	1
NC_000001.11	33363187	33365346	RefSeqFE_enhancer_GeneID:110121088	NC_000001.11	33364200	33365000	Ensembl104_CTCF_binding_site:ENSR00000353284	800	2159	800	0.370542	1
NC_000001.11	33363187	33365346	RefSeqFE_enhancer_GeneID:110121088	NC_000001.11	33364364	33364564	ENCODEcCRE_EH38E1335920_distal_enhancer	200	2159	200	0.0926355	1
NC_000001.11	33363187	33365346	RefSeqFE_enhancer_GeneID:110121088	NC_000001.11	33364647	33364830	ENCODEcCRE_EH38E1335921_distal_enhancer	183	2159	183	0.0847615	1
NC_000001.11	33363187	33365346	RefSeqFE_enhancer_GeneID:110121088	NC_000001.11	33364974	33365186	ENCODEcCRE_EH38E1335922_distal_enhancer	212	2159	212	0.0981936	1
NC_000001.11	33363187	33365346	RefSeqFE_enhancer_GeneID:110121088	NC_000001.11	33322687	33393716	dbSUPER_Brain_Hippocampus_Middle_SE_05882	2159	2159	71029	1	0.030396
NC_000001.11	33363187	33365346	RefSeqFE_enhancer_GeneID:110121088	NC_000001.11	33323626	33394150	dbSUPER_Brain_Inferior_Temporal_Lobe_SE_07821	2159	2159	70524	1	0.0306137
NC_000001.11	33363187	33365346	RefSeqFE_enhancer_GeneID:110121088	NC_000001.11	33324067	33393522	dbSUPER_Brain_Anterior_Caudate_SE_03931	2159	2159	69455	1	0.0310849
NC_000001.11	33363187	33365346	RefSeqFE_enhancer_GeneID:110121088	NC_000001.11	33324742	33392924	dbSUPER_Brain_Hippocampus_Middle_150_SE_06849	2159	2159	68182	1	0.0316652
NC_000001.11	33363187	33365346	RefSeqFE_enhancer_GeneID:110121088	NC_000001.11	33324778	33394161	dbSUPER_Brain_Cingulate_Gyrus_SE_04902	2159	2159	69383	1	0.0311171
NC_000001.11	33363187	33365346	RefSeqFE_enhancer_GeneID:110121088	NC_000001.11	33325110	33410782	dbSUPER_Lung_SE_42268	2159	2159	85672	1	0.0252008
NC_000001.11	33363187	33365346	RefSeqFE_enhancer_GeneID:110121088	NC_000001.11	33325166	33367990	dbSUPER_Spleen_SE_53534	2159	2159	42824	1	0.0504157
NC_000001.11	33363187	33365346	RefSeqFE_enhancer_GeneID:110121088	NC_000001.11	33326947	33366256	dbSUPER_Sigmoid_Colon_SE_50397	2159	2159	39309	1	0.0549238
NC_000001.11	33363187	33365346	RefSeqFE_enhancer_GeneID:110121088	NC_000001.11	33326981	33392273	dbSUPER_Brain_Angular_Gyrus_SE_03193	2159	2159	65292	1	0.0330668
NC_000001.11	33363187	33365346	RefSeqFE_enhancer_GeneID:110121088	NC_000001.11	33327180	33366417	dbSUPER_HSMMtube_SE_37317	2159	2159	39237	1	0.0550246
NC_000001.11	33363187	33365346	RefSeqFE_enhancer_GeneID:110121088	NC_000001.11	33330829	33368198	dbSUPER_Psoas_Muscle_SE_48345	2159	2159	37369	1	0.0577752
NC_000001.11	33363187	33365346	RefSeqFE_enhancer_GeneID:110121088	NC_000001.11	33330906	33385032	dbSUPER_Skeletal_Muscle_SE_51341	2159	2159	54126	1	0.0398884
NC_000001.11	33363187	33365346	RefSeqFE_enhancer_GeneID:110121088	NC_000001.11	33331723	33383958	dbSUPER_Right_Atrium_SE_48801	2159	2159	52235	1	0.0413324
NC_000001.11	33363187	33365346	RefSeqFE_enhancer_GeneID:110121088	NC_000001.11	33331738	33375946	dbSUPER_Stomach_Smooth_Muscle_SE_54994	2159	2159	44208	1	0.0488373
NC_000001.11	33363187	33365346	RefSeqFE_enhancer_GeneID:110121088	NC_000001.11	33331759	33366597	dbSUPER_Duodenum_Smooth_Muscle_SE_25917	2159	2159	34838	1	0.0619726
NC_000001.11	33363187	33365346	RefSeqFE_enhancer_GeneID:110121088	NC_000001.11	33336197	33380503	dbSUPER_H2171_SE_33616	2159	2159	44306	1	0.0487293
NC_000001.11	33363187	33365346	RefSeqFE_enhancer_GeneID:110121088	NC_000001.11	33337923	33366723	dbSUPER_Fetal_Muscle_SE_30304	2159	2159	28800	1	0.0749653
NC_000001.11	33363187	33365346	RefSeqFE_enhancer_GeneID:110121088	NC_000001.11	33362332	33383109	dbSUPER_Brain_Mid_Frontal_Lobe_SE_09073	2159	2159	20777	1	0.103913
NC_000001.11	33363187	33365346	RefSeqFE_enhancer_GeneID:110121088	NC_000001.11	33326893	33436327	dbSUPER_Left_Ventricle_SE_40689	2159	2159	109434	1	0.0197288
NC_000001.11	35715507	35715802	RefSeqFE_enhancer_GeneID:112577585	NC_000001.11	35715000	35716400	Ensembl104_CTCF_binding_site:ENSR00000353746	295	295	1400	1	0.210714
NC_000001.11	35715507	35715802	RefSeqFE_enhancer_GeneID:112577585	NC_000001.11	35715490	35715835	ENCODEcCRE_EH38E1337000_distal_enhancer	295	295	345	1	0.855072
NC_000001.11	36248327	36248622	RefSeqFE_enhancer_GeneID:111828505	NC_000001.11	36248364	36248687	ENCODEcCRE_EH38E1337334_distal_enhancer	258	295	323	0.874576	0.798762
NC_000001.11	36248327	36248622	RefSeqFE_enhancer_GeneID:111828505	NC_000001.11	36222423	36249450	dbSUPER_CD4_Memory_Primary_7pool_SE_15018	295	295	27027	1	0.010915
NC_000001.11	36248327	36248622	RefSeqFE_enhancer_GeneID:111828505	NC_000001.11	36222743	36301083	dbSUPER_Skeletal_Muscle_SE_51263	295	295	78340	1	0.00376564
NC_000001.11	36248327	36248622	RefSeqFE_enhancer_GeneID:111828505	NC_000001.11	36226194	36301582	dbSUPER_Psoas_Muscle_SE_48396	295	295	75388	1	0.00391309
NC_000001.11	36248327	36248622	RefSeqFE_enhancer_GeneID:111828505	NC_000001.11	36246800	36259600	Ensembl104_promoter_flanking_region:ENSR00000353863	295	295	12800	1	0.0230469
NC_000001.11	36248387	36248682	RefSeqFE_enhancer_GeneID:111828505	NC_000001.11	36248364	36248687	ENCODEcCRE_EH38E1337334_distal_enhancer	295	295	323	1	0.913313
NC_000001.11	36248387	36248682	RefSeqFE_enhancer_GeneID:111828505	NC_000001.11	36222423	36249450	dbSUPER_CD4_Memory_Primary_7pool_SE_15018	295	295	27027	1	0.010915
NC_000001.11	36248387	36248682	RefSeqFE_enhancer_GeneID:111828505	NC_000001.11	36222743	36301083	dbSUPER_Skeletal_Muscle_SE_51263	295	295	78340	1	0.00376564
NC_000001.11	36248387	36248682	RefSeqFE_enhancer_GeneID:111828505	NC_000001.11	36226194	36301582	dbSUPER_Psoas_Muscle_SE_48396	295	295	75388	1	0.00391309
NC_000001.11	36248387	36248682	RefSeqFE_enhancer_GeneID:111828505	NC_000001.11	36246800	36259600	Ensembl104_promoter_flanking_region:ENSR00000353863	295	295	12800	1	0.0230469
NC_000001.11	36269407	36269702	RefSeqFE_enhancer_GeneID:112577586	NC_000001.11	36269041	36269848	Ensembl104_TF_binding_site:ENSR00001167226	295	295	807	1	0.365551
NC_000001.11	36269407	36269702	RefSeqFE_enhancer_GeneID:112577586	NC_000001.11	36269420	36269746	ENCODEcCRE_EH38E1337358_distal_enhancer	282	295	326	0.955932	0.865031
NC_000001.11	36269407	36269702	RefSeqFE_enhancer_GeneID:112577586	NC_000001.11	36222743	36301083	dbSUPER_Skeletal_Muscle_SE_51263	295	295	78340	1	0.00376564
NC_000001.11	36269407	36269702	RefSeqFE_enhancer_GeneID:112577586	NC_000001.11	36226194	36301582	dbSUPER_Psoas_Muscle_SE_48396	295	295	75388	1	0.00391309
NC_000001.11	36373807	36374102	RefSeqFE_enhancer_GeneID:112577587	NC_000001.11	36372581	36388287	dbSUPER_Ovary_SE_46918	295	295	15706	1	0.0187826
NC_000001.11	36373807	36374102	RefSeqFE_enhancer_GeneID:112577587	NC_000001.11	36372632	36388457	dbSUPER_HMEC_SE_36804	295	295	15825	1	0.0186414
NC_000001.11	36373807	36374102	RefSeqFE_enhancer_GeneID:112577587	NC_000001.11	36372701	36388397	dbSUPER_NHEK_SE_64626	295	295	15696	1	0.0187946
NC_000001.11	36373807	36374102	RefSeqFE_enhancer_GeneID:112577587	NC_000001.11	36372745	36387973	dbSUPER_VACO_400_SE_57079	295	295	15228	1	0.0193722
NC_000001.11	36373807	36374102	RefSeqFE_enhancer_GeneID:112577587	NC_000001.11	36372839	36388303	dbSUPER_Colon_Crypt_1_SE_23471	295	295	15464	1	0.0190766
NC_000001.11	36373807	36374102	RefSeqFE_enhancer_GeneID:112577587	NC_000001.11	36373140	36388136	dbSUPER_Pancreas_SE_47743	295	295	14996	1	0.0196719
NC_000001.11	36373807	36374102	RefSeqFE_enhancer_GeneID:112577587	NC_000001.11	36373823	36374173	ENCODEcCRE_EH38E1337458_distal_enhancer	279	295	350	0.945763	0.797143
NC_000001.11	36373807	36374102	RefSeqFE_enhancer_GeneID:112577587	NC_000001.11	36373850	36374369	FANTOM5_enhancer_chr1:36373850-36374369	252	295	519	0.854237	0.485549
NC_000001.11	36373807	36374102	RefSeqFE_enhancer_GeneID:112577587	NC_000001.11	36373999	36375201	Ensembl104_promoter:ENSR00001167237	103	295	1202	0.349153	0.0856905
NC_000001.11	36373807	36374102	RefSeqFE_enhancer_GeneID:112577587	NC_000001.11	36341553	36390292	dbSUPER_Aorta_SE_01740	295	295	48739	1	0.00605265
NC_000001.11	36373807	36374102	RefSeqFE_enhancer_GeneID:112577587	NC_000001.11	36341976	36388542	dbSUPER_HUVEC_SE_38175	295	295	46566	1	0.00633509
NC_000001.11	36373807	36374102	RefSeqFE_enhancer_GeneID:112577587	NC_000001.11	36342061	36401263	dbSUPER_Adipose_Nuclei_SE_00264	295	295	59202	1	0.00498294
NC_000001.11	36373807	36374102	RefSeqFE_enhancer_GeneID:112577587	NC_000001.11	36342332	36409061	dbSUPER_Osteoblasts_SE_45845	295	295	66729	1	0.00442087
NC_000001.11	36373807	36374102	RefSeqFE_enhancer_GeneID:112577587	NC_000001.11	36342465	36388667	dbSUPER_u87_SE_55982	295	295	46202	1	0.006385
NC_000001.11	36373807	36374102	RefSeqFE_enhancer_GeneID:112577587	NC_000001.11	36342482	36388791	dbSUPER_Brain_Hippocampus_Middle_SE_06364	295	295	46309	1	0.00637025
NC_000001.11	36373807	36374102	RefSeqFE_enhancer_GeneID:112577587	NC_000001.11	36342567	36402465	dbSUPER_CD14_SE_09252	295	295	59898	1	0.00492504
NC_000001.11	36373807	36374102	RefSeqFE_enhancer_GeneID:112577587	NC_000001.11	36342666	36401105	dbSUPER_Esophagus_SE_26702	295	295	58439	1	0.005048
NC_000001.11	36373807	36374102	RefSeqFE_enhancer_GeneID:112577587	NC_000001.11	36342791	36388436	dbSUPER_NHLF_SE_44847	295	295	45645	1	0.00646292
NC_000001.11	36373807	36374102	RefSeqFE_enhancer_GeneID:112577587	NC_000001.11	36342851	36388335	dbSUPER_HSMM_SE_63764	295	295	45484	1	0.0064858
NC_000001.11	36373807	36374102	RefSeqFE_enhancer_GeneID:112577587	NC_000001.11	36343000	36388321	dbSUPER_Skeletal_Muscle_Myoblast_SE_51965	295	295	45321	1	0.00650912
NC_000001.11	36373807	36374102	RefSeqFE_enhancer_GeneID:112577587	NC_000001.11	36348575	36401914	dbSUPER_Tonsil_SE_62579	295	295	53339	1	0.00553066
NC_000001.11	36373807	36374102	RefSeqFE_enhancer_GeneID:112577587	NC_000001.11	36348669	36390604	dbSUPER_HSMMtube_SE_37159	295	295	41935	1	0.0070347
NC_000001.11	36373807	36374102	RefSeqFE_enhancer_GeneID:112577587	NC_000001.11	36349090	36402109	dbSUPER_Sigmoid_Colon_SE_50223	295	295	53019	1	0.00556404
NC_000001.11	36373807	36374102	RefSeqFE_enhancer_GeneID:112577587	NC_000001.11	36349470	36401818	dbSUPER_Small_Intestine_SE_52539	295	295	52348	1	0.00563536
NC_000001.11	36373807	36374102	RefSeqFE_enhancer_GeneID:112577587	NC_000001.11	36349774	36388477	dbSUPER_CD34_Primary_RO01536_SE_13460	295	295	38703	1	0.00762215
NC_000001.11	36373807	36374102	RefSeqFE_enhancer_GeneID:112577587	NC_000001.11	36349822	36388539	dbSUPER_CD4_Memory_Primary_7pool_SE_14627	295	295	38717	1	0.00761939
NC_000001.11	36373807	36374102	RefSeqFE_enhancer_GeneID:112577587	NC_000001.11	36349860	36388687	dbSUPER_CD4p_CD25-_Il17-_PMAstim_Th_SE_18903	295	295	38827	1	0.00759781
NC_000001.11	36373807	36374102	RefSeqFE_enhancer_GeneID:112577587	NC_000001.11	36358725	36402109	dbSUPER_CD20_SE_11159	295	295	43384	1	0.00679974
NC_000001.11	36373807	36374102	RefSeqFE_enhancer_GeneID:112577587	NC_000001.11	36359230	36401850	dbSUPER_CD19_Primary_SE_10618	295	295	42620	1	0.00692163
NC_000001.11	36373807	36374102	RefSeqFE_enhancer_GeneID:112577587	NC_000001.11	36359626	36388311	dbSUPER_LNCaP_SE_41942	295	295	28685	1	0.0102841
NC_000001.11	36373807	36374102	RefSeqFE_enhancer_GeneID:112577587	NC_000001.11	36364849	36402098	dbSUPER_Brain_Hippocampus_Middle_150_SE_07553	295	295	37249	1	0.00791968
NC_000001.11	36373807	36374102	RefSeqFE_enhancer_GeneID:112577587	NC_000001.11	36364857	36390194	dbSUPER_Brain_Inferior_Temporal_Lobe_SE_08563	295	295	25337	1	0.0116431
NC_000001.11	36373807	36374102	RefSeqFE_enhancer_GeneID:112577587	NC_000001.11	36365040	36388456	dbSUPER_CD4p_CD25-_CD45ROp_Memory_SE_18215	295	295	23416	1	0.0125982
NC_000001.11	36373807	36374102	RefSeqFE_enhancer_GeneID:112577587	NC_000001.11	36365136	36390182	dbSUPER_Fetal_Muscle_SE_30355	295	295	25046	1	0.0117783
NC_000001.11	36373807	36374102	RefSeqFE_enhancer_GeneID:112577587	NC_000001.11	36365146	36388359	dbSUPER_CD4p_CD25-_Il17p_PMAstim_Th17_SE_19575	295	295	23213	1	0.0127084
NC_000001.11	36373807	36374102	RefSeqFE_enhancer_GeneID:112577587	NC_000001.11	36365170	36402021	dbSUPER_Skeletal_Muscle_SE_51487	295	295	36851	1	0.00800521
NC_000001.11	36373807	36374102	RefSeqFE_enhancer_GeneID:112577587	NC_000001.11	36365182	36388496	dbSUPER_Brain_Anterior_Caudate_SE_04744	295	295	23314	1	0.0126533
NC_000001.11	36373807	36374102	RefSeqFE_enhancer_GeneID:112577587	NC_000001.11	36365392	36388542	dbSUPER_Fetal_Intestine_SE_27925	295	295	23150	1	0.012743
NC_000001.11	36373807	36374102	RefSeqFE_enhancer_GeneID:112577587	NC_000001.11	36365428	36388490	dbSUPER_CD8_Memory_7pool_SE_20930	295	295	23062	1	0.0127916
NC_000001.11	36373807	36374102	RefSeqFE_enhancer_GeneID:112577587	NC_000001.11	36365435	36388371	dbSUPER_Brain_Angular_Gyrus_SE_03711	295	295	22936	1	0.0128619
NC_000001.11	36373807	36374102	RefSeqFE_enhancer_GeneID:112577587	NC_000001.11	36365573	36388437	dbSUPER_Left_Ventricle_SE_41385	295	295	22864	1	0.0129024
NC_000001.11	36373807	36374102	RefSeqFE_enhancer_GeneID:112577587	NC_000001.11	36365573	36388615	dbSUPER_Fetal_Intestine_Large_SE_28867	295	295	23042	1	0.0128027
NC_000001.11	36373807	36374102	RefSeqFE_enhancer_GeneID:112577587	NC_000001.11	36365616	36402419	dbSUPER_CD56_SE_20413	295	295	36803	1	0.00801565
NC_000001.11	36373807	36374102	RefSeqFE_enhancer_GeneID:112577587	NC_000001.11	36365825	36401628	dbSUPER_Gastric_SE_31812	295	295	35803	1	0.00823953
NC_000001.11	36373807	36374102	RefSeqFE_enhancer_GeneID:112577587	NC_000001.11	36365833	36388294	dbSUPER_Adrenal_Gland_SE_01346	295	295	22461	1	0.0131339
NC_000001.11	36373807	36374102	RefSeqFE_enhancer_GeneID:112577587	NC_000001.11	36365839	36390368	dbSUPER_Right_Atrium_SE_48926	295	295	24529	1	0.0120266
NC_000001.11	36373807	36374102	RefSeqFE_enhancer_GeneID:112577587	NC_000001.11	36365846	36391495	dbSUPER_Pancreatic_islets_SE_65601	295	295	25649	1	0.0115014
NC_000001.11	36373807	36374102	RefSeqFE_enhancer_GeneID:112577587	NC_000001.11	36365959	36388163	dbSUPER_CD34_Primary_RO01549_SE_14329	295	295	22204	1	0.0132859
NC_000001.11	36373807	36374102	RefSeqFE_enhancer_GeneID:112577587	NC_000001.11	36365972	36388143	dbSUPER_Colon_Crypt_2_SE_24109	295	295	22171	1	0.0133057
NC_000001.11	36373807	36374102	RefSeqFE_enhancer_GeneID:112577587	NC_000001.11	36368886	36398644	dbSUPER_DHL6_SE_60634	295	295	29758	1	0.0099133
NC_000001.11	36373807	36374102	RefSeqFE_enhancer_GeneID:112577587	NC_000001.11	36369235	36402764	dbSUPER_HCT-116_SE_34522	295	295	33529	1	0.00879835
NC_000001.11	36373807	36374102	RefSeqFE_enhancer_GeneID:112577587	NC_000001.11	36371425	36402164	dbSUPER_K562_SE_39851	295	295	30739	1	0.00959693
NC_000001.11	36373807	36374102	RefSeqFE_enhancer_GeneID:112577587	NC_000001.11	36371457	36392746	dbSUPER_Psoas_Muscle_SE_48304	295	295	21289	1	0.0138569
NC_000001.11	36373807	36374102	RefSeqFE_enhancer_GeneID:112577587	NC_000001.11	36371819	36390882	dbSUPER_Duodenum_Smooth_Muscle_SE_26185	295	295	19063	1	0.015475
NC_000001.11	36373807	36374102	RefSeqFE_enhancer_GeneID:112577587	NC_000001.11	36371965	36388444	dbSUPER_IMR90_SE_39220	295	295	16479	1	0.0179016
NC_000001.11	36373807	36374102	RefSeqFE_enhancer_GeneID:112577587	NC_000001.11	36372078	36391434	dbSUPER_Stomach_Smooth_Muscle_SE_54977	295	295	19356	1	0.0152408
NC_000001.11	36373807	36374102	RefSeqFE_enhancer_GeneID:112577587	NC_000001.11	36372138	36413193	dbSUPER_HeLa_SE_35269	295	295	41055	1	0.00718548
NC_000001.11	36373807	36374102	RefSeqFE_enhancer_GeneID:112577587	NC_000001.11	36372292	36388079	dbSUPER_CD34_Primary_RO01480_SE_13093	295	295	15787	1	0.0186863
NC_000001.11	36373807	36374102	RefSeqFE_enhancer_GeneID:112577587	NC_000001.11	36372323	36388338	dbSUPER_Astrocytes_SE_02710	295	295	16015	1	0.0184202
NC_000001.11	36446367	36446662	RefSeqFE_enhancer_GeneID:112577588	NC_000001.11	36446200	36446800	Ensembl104_CTCF_binding_site:ENSR00000251202	295	295	600	1	0.491667
NC_000001.11	36446367	36446662	RefSeqFE_enhancer_GeneID:112577588	NC_000001.11	36446427	36446658	ENCODEcCRE_EH38E1337526_distal_enhancer	231	295	231	0.783051	1
NC_000001.11	36446367	36446662	RefSeqFE_enhancer_GeneID:112577588	NC_000001.11	36446599	36447001	Ensembl104_promoter:ENSR00000922623	63	295	402	0.213559	0.156716
NC_000001.11	36743832	36743965	RefSeqFE_transcriptional_cis_regulatory_region_GeneID:115801424	NC_000001.11	36743388	36744084	Ensembl104_open_chromatin_region:ENSR00000353996	133	133	696	1	0.191092
NC_000001.11	37479687	37479982	RefSeqFE_enhancer_GeneID:112577589	NC_000001.11	37471211	37480703	dbSUPER_Astrocytes_SE_02806	295	295	9492	1	0.0310788
NC_000001.11	37479687	37479982	RefSeqFE_enhancer_GeneID:112577589	NC_000001.11	37471302	37480612	dbSUPER_Bladder_SE_03113	295	295	9310	1	0.0316864
NC_000001.11	37479687	37479982	RefSeqFE_enhancer_GeneID:112577589	NC_000001.11	37471309	37480723	dbSUPER_VACO_503_SE_57614	295	295	9414	1	0.0313363
NC_000001.11	37479687	37479982	RefSeqFE_enhancer_GeneID:112577589	NC_000001.11	37471478	37486206	dbSUPER_CD4p_CD25-_Il17-_PMAstim_Th_SE_18659	295	295	14728	1	0.0200299
NC_000001.11	37479687	37479982	RefSeqFE_enhancer_GeneID:112577589	NC_000001.11	37471627	37482368	dbSUPER_CD56_SE_20187	295	295	10741	1	0.0274649
NC_000001.11	37479687	37479982	RefSeqFE_enhancer_GeneID:112577589	NC_000001.11	37471644	37481908	dbSUPER_CD4_Memory_Primary_7pool_SE_14941	295	295	10264	1	0.0287412
NC_000001.11	37479687	37479982	RefSeqFE_enhancer_GeneID:112577589	NC_000001.11	37471664	37481126	dbSUPER_CD8_Naive_7pool_SE_21794	295	295	9462	1	0.0311773
NC_000001.11	37479687	37479982	RefSeqFE_enhancer_GeneID:112577589	NC_000001.11	37472108	37482243	dbSUPER_CD3_SE_12046	295	295	10135	1	0.0291071
NC_000001.11	37479687	37479982	RefSeqFE_enhancer_GeneID:112577589	NC_000001.11	37472399	37481401	Ensembl104_promoter:ENSR00000004852	295	295	9002	1	0.0327705
NC_000001.11	37479687	37479982	RefSeqFE_enhancer_GeneID:112577589	NC_000001.11	37472506	37480713	dbSUPER_CD4_Naive_Primary_8pool_SE_16682	295	295	8207	1	0.0359449
NC_000001.11	37479687	37479982	RefSeqFE_enhancer_GeneID:112577589	NC_000001.11	37472676	37481288	dbSUPER_CD8_Memory_7pool_SE_21053	295	295	8612	1	0.0342545
NC_000001.11	37479687	37479982	RefSeqFE_enhancer_GeneID:112577589	NC_000001.11	37472754	37481000	dbSUPER_CD4p_CD225int_CD127p_Tmem_SE_16974	295	295	8246	1	0.0357749
NC_000001.11	37479687	37479982	RefSeqFE_enhancer_GeneID:112577589	NC_000001.11	37473559	37480680	dbSUPER_CD4_Memory_Primary_8pool_SE_15766	295	295	7121	1	0.0414268
NC_000001.11	37479687	37479982	RefSeqFE_enhancer_GeneID:112577589	NC_000001.11	37473924	37480953	dbSUPER_VACO_9m_SE_58251	295	295	7029	1	0.041969
NC_000001.11	37479687	37479982	RefSeqFE_enhancer_GeneID:112577589	NC_000001.11	37479645	37479994	ENCODEcCRE_EH38E1338064_proximal_enhancer	295	295	349	1	0.845272
NC_000001.11	37479687	37479982	RefSeqFE_enhancer_GeneID:112577589	NC_000001.11	37465426	37486188	dbSUPER_Pancreas_SE_47620	295	295	20762	1	0.0142087
NC_000001.11	37479687	37479982	RefSeqFE_enhancer_GeneID:112577589	NC_000001.11	37451759	37488071	dbSUPER_Pancreatic_islets_SE_65323	295	295	36312	1	0.00812404
NC_000001.11	37479687	37479982	RefSeqFE_enhancer_GeneID:112577589	NC_000001.11	37454517	37500046	dbSUPER_Osteoblasts_SE_46585	295	295	45529	1	0.00647939
NC_000001.11	37479687	37479982	RefSeqFE_enhancer_GeneID:112577589	NC_000001.11	37454531	37508860	dbSUPER_Psoas_Muscle_SE_48484	295	295	54329	1	0.00542988
NC_000001.11	37479687	37479982	RefSeqFE_enhancer_GeneID:112577589	NC_000001.11	37454642	37487602	dbSUPER_Adrenal_Gland_SE_00995	295	295	32960	1	0.00895024
NC_000001.11	37479687	37479982	RefSeqFE_enhancer_GeneID:112577589	NC_000001.11	37464256	37487885	dbSUPER_Fetal_Intestine_Large_SE_28852	295	295	23629	1	0.0124847
NC_000001.11	37479687	37479982	RefSeqFE_enhancer_GeneID:112577589	NC_000001.11	37464469	37487687	dbSUPER_Fetal_Intestine_SE_27863	295	295	23218	1	0.0127057
NC_000001.11	37479687	37479982	RefSeqFE_enhancer_GeneID:112577589	NC_000001.11	37464515	37499705	dbSUPER_Gastric_SE_31547	295	295	35190	1	0.00838306
NC_000001.11	37479687	37479982	RefSeqFE_enhancer_GeneID:112577589	NC_000001.11	37464527	37500252	dbSUPER_LNCaP_SE_41638	295	295	35725	1	0.00825752
NC_000001.11	37479687	37479982	RefSeqFE_enhancer_GeneID:112577589	NC_000001.11	37465954	37487810	dbSUPER_Esophagus_SE_26814	295	295	21856	1	0.0134974
NC_000001.11	37479687	37479982	RefSeqFE_enhancer_GeneID:112577589	NC_000001.11	37470407	37487644	dbSUPER_Aorta_SE_01903	295	295	17237	1	0.0171143
NC_000001.11	37479687	37479982	RefSeqFE_enhancer_GeneID:112577589	NC_000001.11	37470422	37500262	dbSUPER_HSMMtube_SE_37759	295	295	29840	1	0.00988606
NC_000001.11	37479687	37479982	RefSeqFE_enhancer_GeneID:112577589	NC_000001.11	37470553	37500176	dbSUPER_HeLa_SE_34808	295	295	29623	1	0.00995848
NC_000001.11	37479687	37479982	RefSeqFE_enhancer_GeneID:112577589	NC_000001.11	37471052	37487898	dbSUPER_Duodenum_Smooth_Muscle_SE_26141	295	295	16846	1	0.0175116
NC_000001.11	37479687	37479982	RefSeqFE_enhancer_GeneID:112577589	NC_000001.11	37471081	37488073	dbSUPER_Spleen_SE_54020	295	295	16992	1	0.0173611
NC_000001.11	37479687	37479982	RefSeqFE_enhancer_GeneID:112577589	NC_000001.11	37471084	37487707	dbSUPER_Tonsil_SE_62625	295	295	16623	1	0.0177465
NC_000001.11	37479687	37479982	RefSeqFE_enhancer_GeneID:112577589	NC_000001.11	37471096	37499769	dbSUPER_Lung_SE_42562	295	295	28673	1	0.0102884
NC_000001.11	37479687	37479982	RefSeqFE_enhancer_GeneID:112577589	NC_000001.11	37471114	37487668	dbSUPER_CD8_primary_SE_22516	295	295	16554	1	0.0178205
NC_000001.11	37479687	37479982	RefSeqFE_enhancer_GeneID:112577589	NC_000001.11	37471136	37487991	dbSUPER_u87_SE_56449	295	295	16855	1	0.0175022
NC_000001.11	37479687	37479982	RefSeqFE_enhancer_GeneID:112577589	NC_000001.11	37471149	37487868	dbSUPER_NHEK_SE_64577	295	295	16719	1	0.0176446
NC_000001.11	37479687	37479982	RefSeqFE_enhancer_GeneID:112577589	NC_000001.11	37471164	37487588	dbSUPER_HMEC_SE_36403	295	295	16424	1	0.0179615
NC_000001.11	37479687	37479982	RefSeqFE_enhancer_GeneID:112577589	NC_000001.11	37471170	37487870	dbSUPER_Sigmoid_Colon_SE_50165	295	295	16700	1	0.0176647
NC_000001.11	37479687	37479982	RefSeqFE_enhancer_GeneID:112577589	NC_000001.11	37471186	37487770	dbSUPER_NHLF_SE_45338	295	295	16584	1	0.0177882
NC_000001.11	37479687	37479982	RefSeqFE_enhancer_GeneID:112577589	NC_000001.11	37471197	37487683	dbSUPER_Right_Atrium_SE_49357	295	295	16486	1	0.017894
NC_000001.11	37479687	37479982	RefSeqFE_enhancer_GeneID:112577589	NC_000001.11	37471203	37487778	dbSUPER_Small_Intestine_SE_52446	295	295	16575	1	0.0177979
NC_000001.11	37479687	37479982	RefSeqFE_enhancer_GeneID:112577589	NC_000001.11	37471209	37488015	dbSUPER_CD4p_CD25-_CD45ROp_Memory_SE_17864	295	295	16806	1	0.0175533
NC_000001.11	37479687	37479982	RefSeqFE_enhancer_GeneID:112577589	NC_000001.11	37471251	37499740	dbSUPER_Colon_Crypt_1_SE_23342	295	295	28489	1	0.0103549
NC_000001.11	37479687	37479982	RefSeqFE_enhancer_GeneID:112577589	NC_000001.11	37471289	37487683	dbSUPER_Colon_Crypt_2_SE_23956	295	295	16394	1	0.0179944
NC_000001.11	37479687	37479982	RefSeqFE_enhancer_GeneID:112577589	NC_000001.11	37471773	37487977	dbSUPER_CD4p_CD25-_CD45RAp_Naive_SE_17494	295	295	16204	1	0.0182054
NC_000001.11	37479687	37479982	RefSeqFE_enhancer_GeneID:112577589	NC_000001.11	37473167	37487860	dbSUPER_CD4p_CD25-_Il17p_PMAstim_Th17_SE_19263	295	295	14693	1	0.0200776
NC_000001.11	37479687	37479982	RefSeqFE_enhancer_GeneID:112577589	NC_000001.11	37473338	37487940	dbSUPER_CD20_SE_11493	295	295	14602	1	0.0202027
NC_000001.11	37556727	37557022	RefSeqFE_enhancer_GeneID:112577590	NC_000001.11	37556199	37557801	Ensembl104_promoter:ENSR00000922721	295	295	1602	1	0.184145
NC_000001.11	37556727	37557022	RefSeqFE_enhancer_GeneID:112577590	NC_000001.11	37556717	37557066	ENCODEcCRE_EH38E1338120_promoter	295	295	349	1	0.845272
NC_000001.11	38031456	38031751	RefSeqFE_enhancer_GeneID:112577591	NC_000001.11	38031407	38031754	ENCODEcCRE_EH38E1338474_distal_enhancer	295	295	347	1	0.850144
NC_000001.11	38031456	38031751	RefSeqFE_enhancer_GeneID:112577591	NC_000001.11	38022810	38107764	dbSUPER_Ly3_SE_58916	295	295	84954	1	0.00347247
NC_000001.11	38031456	38031751	RefSeqFE_enhancer_GeneID:112577591	NC_000001.11	37994756	38039524	dbSUPER_Esophagus_SE_26966	295	295	44768	1	0.00658953
NC_000001.11	38031456	38031751	RefSeqFE_enhancer_GeneID:112577591	NC_000001.11	37995155	38031995	dbSUPER_Adrenal_Gland_SE_01069	295	295	36840	1	0.0080076
NC_000001.11	38094521	38095934	RefSeqFE_enhancer_GeneID:110120621	NC_000001.11	38093401	38094999	Ensembl104_promoter_flanking_region:ENSR00000354291	478	1413	1598	0.338287	0.299124
NC_000001.11	38094521	38095934	RefSeqFE_enhancer_GeneID:110120621	NC_000001.11	38094521	38095934	VISTA_enhancer_positive_hs238	1413	1413	1413	1	1
NC_000001.11	38094521	38095934	RefSeqFE_enhancer_GeneID:110120621	NC_000001.11	38094879	38095107	ENCODEcCRE_EH38E1338535_distal_enhancer	228	1413	228	0.161359	1
NC_000001.11	38094521	38095934	RefSeqFE_enhancer_GeneID:110120621	NC_000001.11	38095109	38095311	ENCODEcCRE_EH38E1338536_distal_enhancer	202	1413	202	0.142958	1
NC_000001.11	38094521	38095934	RefSeqFE_enhancer_GeneID:110120621	NC_000001.11	38095455	38095804	ENCODEcCRE_EH38E1338537_distal_enhancer	349	1413	349	0.246992	1
NC_000001.11	38094521	38095934	RefSeqFE_enhancer_GeneID:110120621	NC_000001.11	38095600	38096000	Ensembl104_enhancer:ENSR00001167338	334	1413	400	0.236377	0.835
NC_000001.11	38094521	38095934	RefSeqFE_enhancer_GeneID:110120621	NC_000001.11	38022810	38107764	dbSUPER_Ly3_SE_58916	1413	1413	84954	1	0.0166325
NC_000001.11	38246402	38247845	RefSeqFE_enhancer_GeneID:110120958	NC_000001.11	38246201	38248000	Ensembl104_promoter_flanking_region:ENSR00000922809	1443	1443	1799	1	0.802112
NC_000001.11	38246402	38247845	RefSeqFE_enhancer_GeneID:110120958	NC_000001.11	38246402	38247845	VISTA_enhancer_positive_hs1001	1443	1443	1443	1	1
NC_000001.11	38246402	38247845	RefSeqFE_enhancer_GeneID:110120958	NC_000001.11	38246929	38247279	ENCODEcCRE_EH38E1338623_distal_enhancer	350	1443	350	0.24255	1
NC_000001.11	38246402	38247845	RefSeqFE_enhancer_GeneID:110120958	NC_000001.11	38247411	38247568	ENCODEcCRE_EH38E1338624_distal_enhancer	157	1443	157	0.108801	1
NC_000001.11	38246402	38247845	RefSeqFE_enhancer_GeneID:110120958	NC_000001.11	38247652	38247995	ENCODEcCRE_EH38E1338625_distal_enhancer	193	1443	343	0.133749	0.562682
NC_000001.11	38246402	38247845	RefSeqFE_enhancer_GeneID:110120958	NC_000001.11	38247800	38248200	Ensembl104_CTCF_binding_site:ENSR00000354333	45	1443	400	0.031185	0.1125
NC_000001.11	38262512	38266844	RefSeqFE_enhancer_GeneID:110121256	NC_000001.11	38262512	38266844	VISTA_enhancer_positive_hs2088	4332	4332	4332	1	1
NC_000001.11	38262512	38266844	RefSeqFE_enhancer_GeneID:110121256	NC_000001.11	38265649	38265992	ENCODEcCRE_EH38E1338634_distal_enhancer	343	4332	343	0.0791782	1
NC_000001.11	38262512	38266844	RefSeqFE_enhancer_GeneID:110121256	NC_000001.11	38265800	38266400	Ensembl104_enhancer:ENSR00001167355	600	4332	600	0.138504	1
NC_000001.11	38262512	38266844	RefSeqFE_enhancer_GeneID:110121256	NC_000001.11	38266122	38266472	ENCODEcCRE_EH38E1338635_distal_enhancer	350	4332	350	0.0807941	1
NC_000001.11	38262512	38266844	RefSeqFE_enhancer_GeneID:110121256	NC_000001.11	38266800	38267000	Ensembl104_promoter_flanking_region:ENSR00001167356	44	4332	200	0.010157	0.22
NC_000001.11	38370323	38372434	RefSeqFE_enhancer_GeneID:110121139	NC_000001.11	38370704	38370957	ENCODEcCRE_EH38E1338675_distal_enhancer	253	2111	253	0.119848	1
NC_000001.11	38370323	38372434	RefSeqFE_enhancer_GeneID:110121139	NC_000001.11	38370201	38371599	Ensembl104_promoter_flanking_region:ENSR00000354362	1276	2111	1398	0.604453	0.912732
NC_000001.11	38370323	38372434	RefSeqFE_enhancer_GeneID:110121139	NC_000001.11	38370323	38372434	VISTA_enhancer_positive_hs1546	2111	2111	2111	1	1
NC_000001.11	38370323	38372434	RefSeqFE_enhancer_GeneID:110121139	NC_000001.11	38371135	38371483	ENCODEcCRE_EH38E1338676_distal_enhancer	348	2111	348	0.164851	1
NC_000001.11	38489836	38490131	RefSeqFE_enhancer_GeneID:112577594	NC_000001.11	38489400	38490600	Ensembl104_CTCF_binding_site:ENSR00000251296	295	295	1200	1	0.245833
NC_000001.11	38489836	38490131	RefSeqFE_enhancer_GeneID:112577594	NC_000001.11	38489600	38490799	Ensembl104_promoter_flanking_region:ENSR00000354390	295	295	1199	1	0.246038
NC_000001.11	38489836	38490131	RefSeqFE_enhancer_GeneID:112577594	NC_000001.11	38489838	38490187	ENCODEcCRE_EH38E1338727_distal_enhancer	293	295	349	0.99322	0.839542
NC_000001.11	38502836	38503131	RefSeqFE_enhancer_GeneID:112577595	NC_000001.11	38502800	38503200	Ensembl104_CTCF_binding_site:ENSR00000251299	295	295	400	1	0.7375
NC_000001.11	38502836	38503131	RefSeqFE_enhancer_GeneID:112577595	NC_000001.11	38502825	38503124	ENCODEcCRE_EH38E1338734_distal_enhancer	288	295	299	0.976271	0.963211
NC_000001.11	38502836	38503131	RefSeqFE_silencer_GeneID:112577595	NC_000001.11	38502800	38503200	Ensembl104_CTCF_binding_site:ENSR00000251299	295	295	400	1	0.7375
NC_000001.11	38502836	38503131	RefSeqFE_silencer_GeneID:112577595	NC_000001.11	38502825	38503124	ENCODEcCRE_EH38E1338734_distal_enhancer	288	295	299	0.976271	0.963211
NC_000001.11	38527393	38527597	RefSeqFE_transcriptional_cis_regulatory_region_GeneID:115801425	NC_000001.11	38527200	38527600	Ensembl104_CTCF_binding_site:ENSR00000354402	204	204	400	1	0.51
NC_000001.11	38527393	38527597	RefSeqFE_transcriptional_cis_regulatory_region_GeneID:115801425	NC_000001.11	38527327	38527674	ENCODEcCRE_EH38E1338749_distal_enhancer	204	204	347	1	0.587896
NC_000001.11	38726936	38728462	RefSeqFE_enhancer_GeneID:110120969	NC_000001.11	38726600	38727000	Ensembl104_CTCF_binding_site:ENSR00000354460	64	1526	400	0.0419397	0.16
NC_000001.11	38726936	38728462	RefSeqFE_enhancer_GeneID:110120969	NC_000001.11	38726936	38728462	VISTA_enhancer_positive_hs1031	1526	1526	1526	1	1
NC_000001.11	38726936	38728462	RefSeqFE_enhancer_GeneID:110120969	NC_000001.11	38727465	38727673	ENCODEcCRE_EH38E1338826_distal_enhancer	208	1526	208	0.136304	1
NC_000001.11	38726936	38728462	RefSeqFE_enhancer_GeneID:110120969	NC_000001.11	38727801	38728064	FANTOM5_enhancer_chr1:38727801-38728064	263	1526	263	0.172346	1
NC_000001.11	38726936	38728462	RefSeqFE_enhancer_GeneID:110120969	NC_000001.11	38727819	38728025	ENCODEcCRE_EH38E1338827_distal_enhancer	206	1526	206	0.134993	1
NC_000001.11	38726936	38728462	RefSeqFE_enhancer_GeneID:110120969	NC_000001.11	38728156	38728506	ENCODEcCRE_EH38E1338828_distal_enhancer	306	1526	350	0.200524	0.874286
NC_000001.11	38783084	38784457	RefSeqFE_enhancer_GeneID:110121002	NC_000001.11	38781400	38790400	Ensembl104_promoter_flanking_region:ENSR00000354473	1373	1373	9000	1	0.152556
NC_000001.11	38783084	38784457	RefSeqFE_enhancer_GeneID:110121002	NC_000001.11	38783084	38784457	VISTA_enhancer_positive_hs1139	1373	1373	1373	1	1
NC_000001.11	38783084	38784457	RefSeqFE_enhancer_GeneID:110121002	NC_000001.11	38783405	38783604	ENCODEcCRE_EH38E1338861_distal_enhancer	199	1373	199	0.144938	1
NC_000001.11	38783084	38784457	RefSeqFE_enhancer_GeneID:110121002	NC_000001.11	38783698	38784048	ENCODEcCRE_EH38E1338862_distal_enhancer	350	1373	350	0.254916	1
NC_000001.11	38783084	38784457	RefSeqFE_enhancer_GeneID:110121002	NC_000001.11	38784056	38784210	ENCODEcCRE_EH38E1338863_distal_enhancer	154	1373	154	0.112163	1
NC_000001.11	38859696	38859991	RefSeqFE_enhancer_GeneID:112577596	NC_000001.11	38856999	38861801	Ensembl104_promoter:ENSR00000004982	295	295	4802	1	0.0614327
NC_000001.11	38859696	38859991	RefSeqFE_enhancer_GeneID:112577596	NC_000001.11	38859661	38860010	ENCODEcCRE_EH38E1338926_promoter	295	295	349	1	0.845272
NC_000001.11	39387390	39387887	RefSeqFE_enhancer_GeneID:114803468	NC_000001.11	39387499	39387829	ENCODEcCRE_EH38E1339356_distal_enhancer	330	497	330	0.663984	1
NC_000001.11	39387390	39387887	RefSeqFE_enhancer_GeneID:114803468	NC_000001.11	39387600	39388200	Ensembl104_CTCF_binding_site:ENSR00000354599	287	497	600	0.577465	0.478333
NC_000001.11	39387390	39387887	RefSeqFE_enhancer_GeneID:114803468	NC_000001.11	39357718	39411987	dbSUPER_Stomach_Smooth_Muscle_SE_55086	497	497	54269	1	0.00915808
NC_000001.11	39387390	39387887	RefSeqFE_enhancer_GeneID:114803468	NC_000001.11	39358507	39414669	dbSUPER_Aorta_SE_02098	497	497	56162	1	0.0088494
NC_000001.11	39387390	39387887	RefSeqFE_enhancer_GeneID:114803468	NC_000001.11	39369149	39412835	dbSUPER_Adipose_Nuclei_SE_00753	497	497	43686	1	0.0113766
NC_000001.11	39387390	39387887	RefSeqFE_enhancer_GeneID:114803468	NC_000001.11	39379846	39411847	dbSUPER_HUVEC_SE_38617	497	497	32001	1	0.0155308
NC_000001.11	39387390	39387887	RefSeqFE_enhancer_GeneID:114803468	NC_000001.11	39383914	39412784	dbSUPER_Duodenum_Smooth_Muscle_SE_26157	497	497	28870	1	0.0172151
NC_000001.11	39387390	39387887	RefSeqFE_enhancer_GeneID:114803468	NC_000001.11	39384183	39414588	dbSUPER_Right_Atrium_SE_49419	497	497	30405	1	0.016346
NC_000001.11	39387390	39387887	RefSeqFE_enhancer_GeneID:114803468	NC_000001.11	39384562	39412563	dbSUPER_u87_SE_55918	497	497	28001	1	0.0177494
NC_000001.11	39387390	39387887	RefSeqFE_enhancer_GeneID:114803468	NC_000001.11	39386576	39436652	dbSUPER_HSMMtube_SE_37092	497	497	50076	1	0.00992491
NC_000001.11	39387390	39387887	RefSeqFE_enhancer_GeneID:114803468	NC_000001.11	39386801	39388600	Ensembl104_promoter_flanking_region:ENSR00000354598	497	497	1799	1	0.276265
NC_000001.11	39387390	39387887	RefSeqFE_enhancer_GeneID:114803468	NC_000001.11	39386899	39411692	dbSUPER_Astrocytes_SE_02863	497	497	24793	1	0.020046
NC_000001.11	39387390	39387887	RefSeqFE_enhancer_GeneID:114803468	NC_000001.11	39386933	39418904	dbSUPER_HSMM_SE_64104	497	497	31971	1	0.0155453
NC_000001.11	39387390	39387887	RefSeqFE_enhancer_GeneID:114803468	NC_000001.11	39386781	39462777	dbSUPER_Osteoblasts_SE_46332	497	497	75996	1	0.00653982
NC_000001.11	39658076	39658371	RefSeqFE_enhancer_GeneID:112577597	NC_000001.11	39652264	39658999	Ensembl104_promoter_flanking_region:ENSR00000354668	295	295	6735	1	0.043801
NC_000001.11	39658076	39658371	RefSeqFE_enhancer_GeneID:112577597	NC_000001.11	39657600	39659000	Ensembl104_CTCF_binding_site:ENSR00000251341	295	295	1400	1	0.210714
NC_000001.11	39658076	39658371	RefSeqFE_enhancer_GeneID:112577597	NC_000001.11	39658129	39658307	ENCODEcCRE_EH38E1339572_distal_enhancer	178	295	178	0.60339	1
NC_000001.11	39899016	39899311	RefSeqFE_enhancer_GeneID:112577598	NC_000001.11	39898399	39899201	Ensembl104_promoter:ENSR00000354715	185	295	802	0.627119	0.230673
NC_000001.11	39899016	39899311	RefSeqFE_enhancer_GeneID:112577598	NC_000001.11	39898964	39899313	ENCODEcCRE_EH38E1339765_proximal_enhancer	295	295	349	1	0.845272
NC_000001.11	39899016	39899311	RefSeqFE_enhancer_GeneID:112577598	NC_000001.11	39832121	39909087	dbSUPER_CD14_SE_09732	295	295	76966	1	0.00383286
NC_000001.11	40531436	40531731	RefSeqFE_enhancer_GeneID:112577599	NC_000001.11	40530599	40533001	Ensembl104_promoter:ENSR00000005221	295	295	2402	1	0.122814
NC_000001.11	40531436	40531731	RefSeqFE_enhancer_GeneID:112577599	NC_000001.11	40531395	40531745	ENCODEcCRE_EH38E1340224_promoter	295	295	350	1	0.842857
NC_000001.11	40820969	40821114	RefSeqFE_enhancer_GeneID:111464991	NC_000001.11	40820881	40821228	ENCODEcCRE_EH38E1340455_distal_enhancer	145	145	347	1	0.417867
NC_000001.11	40820969	40821114	RefSeqFE_enhancer_GeneID:111464991	NC_000001.11	40774946	40826471	dbSUPER_Aorta_SE_02177	145	145	51525	1	0.00281417
NC_000001.11	40821011	40821156	RefSeqFE_enhancer_GeneID:111464991	NC_000001.11	40820881	40821228	ENCODEcCRE_EH38E1340455_distal_enhancer	145	145	347	1	0.417867
NC_000001.11	40821011	40821156	RefSeqFE_enhancer_GeneID:111464991	NC_000001.11	40774946	40826471	dbSUPER_Aorta_SE_02177	145	145	51525	1	0.00281417
NC_000001.11	40821032	40821050	RefSeqFE_transcriptional_cis_regulatory_region_GeneID:111464991	NC_000001.11	40820881	40821228	ENCODEcCRE_EH38E1340455_distal_enhancer	18	18	347	1	0.0518732
NC_000001.11	40821032	40821050	RefSeqFE_transcriptional_cis_regulatory_region_GeneID:111464991	NC_000001.11	40774946	40826471	dbSUPER_Aorta_SE_02177	18	18	51525	1	0.000349345
NC_000001.11	40821074	40821092	RefSeqFE_transcriptional_cis_regulatory_region_GeneID:111464991	NC_000001.11	40820881	40821228	ENCODEcCRE_EH38E1340455_distal_enhancer	18	18	347	1	0.0518732
NC_000001.11	40821074	40821092	RefSeqFE_transcriptional_cis_regulatory_region_GeneID:111464991	NC_000001.11	40774946	40826471	dbSUPER_Aorta_SE_02177	18	18	51525	1	0.000349345
NC_000001.11	41331256	41331551	RefSeqFE_enhancer_GeneID:112590790	NC_000001.11	41330800	41331800	Ensembl104_CTCF_binding_site:ENSR00000251418	295	295	1000	1	0.295
NC_000001.11	41331256	41331551	RefSeqFE_enhancer_GeneID:112590790	NC_000001.11	41331000	41331800	Ensembl104_promoter_flanking_region:ENSR00000355058	295	295	800	1	0.36875
NC_000001.11	41331256	41331551	RefSeqFE_enhancer_GeneID:112590790	NC_000001.11	41331261	41331513	ENCODEcCRE_EH38E1340818_proximal_enhancer	252	295	252	0.854237	1
NC_000001.11	43476117	43476412	RefSeqFE_enhancer_GeneID:112590791	NC_000001.11	43470401	43478000	Ensembl104_promoter_flanking_region:ENSR00000005597	295	295	7599	1	0.0388209
NC_000001.11	43476117	43476412	RefSeqFE_enhancer_GeneID:112590791	NC_000001.11	43470811	43478249	dbSUPER_HUVEC_SE_38188	295	295	7438	1	0.0396612
NC_000001.11	43476117	43476412	RefSeqFE_enhancer_GeneID:112590791	NC_000001.11	43476181	43476483	ENCODEcCRE_EH38E1342515_distal_enhancer	231	295	302	0.783051	0.764901
NC_000001.11	43929596	43929891	RefSeqFE_enhancer_GeneID:112590792	NC_000001.11	43928201	43931209	Ensembl104_promoter_flanking_region:ENSR00000923450	295	295	3008	1	0.0980718
NC_000001.11	43929596	43929891	RefSeqFE_enhancer_GeneID:112590792	NC_000001.11	43929561	43929911	ENCODEcCRE_EH38E1342912_distal_enhancer	295	295	350	1	0.842857
NC_000001.11	43929596	43929891	RefSeqFE_enhancer_GeneID:112590792	NC_000001.11	43911755	43937886	dbSUPER_HMEC_SE_36897	295	295	26131	1	0.0112893
NC_000001.11	43994836	43995131	RefSeqFE_enhancer_GeneID:112590793	NC_000001.11	43994600	43995600	Ensembl104_CTCF_binding_site:ENSR00000251522	295	295	1000	1	0.295
NC_000001.11	43994836	43995131	RefSeqFE_enhancer_GeneID:112590793	NC_000001.11	43994601	43995399	Ensembl104_promoter_flanking_region:ENSR00001167669	295	295	798	1	0.369674
NC_000001.11	43994836	43995131	RefSeqFE_enhancer_GeneID:112590793	NC_000001.11	43994823	43995171	ENCODEcCRE_EH38E1342997_distal_enhancer	295	295	348	1	0.847701
NC_000001.11	43994836	43995131	RefSeqFE_enhancer_GeneID:112590793	NC_000001.11	43986980	44034225	dbSUPER_Colon_Crypt_3_SE_24883	295	295	47245	1	0.00624405
NC_000001.11	43994836	43995131	RefSeqFE_enhancer_GeneID:112590793	NC_000001.11	43994902	44048866	dbSUPER_Brain_Cingulate_Gyrus_SE_05099	229	295	53964	0.776271	0.00424357
NC_000001.11	44034710	44037665	RefSeqFE_enhancer_GeneID:110121214	NC_000001.11	44034710	44037665	VISTA_enhancer_positive_hs1857	2955	2955	2955	1	1
NC_000001.11	44034710	44037665	RefSeqFE_enhancer_GeneID:110121214	NC_000001.11	44035600	44037800	Ensembl104_CTCF_binding_site:ENSR00000355782	2065	2955	2200	0.698816	0.938636
NC_000001.11	44034710	44037665	RefSeqFE_enhancer_GeneID:110121214	NC_000001.11	44035726	44035891	ENCODEcCRE_EH38E1343048_distal_enhancer	165	2955	165	0.0558376	1
NC_000001.11	44034710	44037665	RefSeqFE_enhancer_GeneID:110121214	NC_000001.11	44035929	44036279	ENCODEcCRE_EH38E1343049_distal_enhancer	350	2955	350	0.118443	1
NC_000001.11	44034710	44037665	RefSeqFE_enhancer_GeneID:110121214	NC_000001.11	44036320	44036522	ENCODEcCRE_EH38E1343050_distal_enhancer	202	2955	202	0.0683587	1
NC_000001.11	44034710	44037665	RefSeqFE_enhancer_GeneID:110121214	NC_000001.11	44036590	44036918	ENCODEcCRE_EH38E1343051_distal_enhancer	328	2955	328	0.110998	1
NC_000001.11	44034710	44037665	RefSeqFE_enhancer_GeneID:110121214	NC_000001.11	44037046	44037387	ENCODEcCRE_EH38E1343052_distal_enhancer	341	2955	341	0.115398	1
NC_000001.11	44034710	44037665	RefSeqFE_enhancer_GeneID:110121214	NC_000001.11	44005469	44037601	dbSUPER_Brain_Anterior_Caudate_SE_04236	2891	2955	32132	0.978342	0.0899726
NC_000001.11	44034710	44037665	RefSeqFE_enhancer_GeneID:110121214	NC_000001.11	44013643	44037387	dbSUPER_Esophagus_SE_27482	2677	2955	23744	0.905922	0.112744
NC_000001.11	44034710	44037665	RefSeqFE_enhancer_GeneID:110121214	NC_000001.11	43994902	44048866	dbSUPER_Brain_Cingulate_Gyrus_SE_05099	2955	2955	53964	1	0.0547587
NC_000001.11	44034710	44037665	RefSeqFE_enhancer_GeneID:110121214	NC_000001.11	43995723	44049028	dbSUPER_Brain_Hippocampus_Middle_150_SE_07053	2955	2955	53305	1	0.0554357
NC_000001.11	44034710	44037665	RefSeqFE_enhancer_GeneID:110121214	NC_000001.11	44006036	44047585	dbSUPER_Brain_Mid_Frontal_Lobe_SE_08955	2955	2955	41549	1	0.0711208
NC_000001.11	44034710	44037665	RefSeqFE_enhancer_GeneID:110121214	NC_000001.11	44023001	44075394	dbSUPER_Ly4_SE_59695	2955	2955	52393	1	0.0564007
NC_000001.11	44034710	44037665	RefSeqFE_enhancer_GeneID:110121214	NC_000001.11	44029435	44050430	dbSUPER_K562_SE_40582	2955	2955	20995	1	0.140748
NC_000001.11	44036048	44036193	RefSeqFE_enhancer_GeneID:110121214	NC_000001.11	44034710	44037665	VISTA_enhancer_positive_hs1857	145	145	2955	1	0.0490694
NC_000001.11	44036048	44036193	RefSeqFE_enhancer_GeneID:110121214	NC_000001.11	44035600	44037800	Ensembl104_CTCF_binding_site:ENSR00000355782	145	145	2200	1	0.0659091
NC_000001.11	44036048	44036193	RefSeqFE_enhancer_GeneID:110121214	NC_000001.11	44035929	44036279	ENCODEcCRE_EH38E1343049_distal_enhancer	145	145	350	1	0.414286
NC_000001.11	44036048	44036193	RefSeqFE_enhancer_GeneID:110121214	NC_000001.11	44005469	44037601	dbSUPER_Brain_Anterior_Caudate_SE_04236	145	145	32132	1	0.00451264
NC_000001.11	44036048	44036193	RefSeqFE_enhancer_GeneID:110121214	NC_000001.11	44013643	44037387	dbSUPER_Esophagus_SE_27482	145	145	23744	1	0.00610681
NC_000001.11	44036048	44036193	RefSeqFE_enhancer_GeneID:110121214	NC_000001.11	43994902	44048866	dbSUPER_Brain_Cingulate_Gyrus_SE_05099	145	145	53964	1	0.00268698
NC_000001.11	44036048	44036193	RefSeqFE_enhancer_GeneID:110121214	NC_000001.11	43995723	44049028	dbSUPER_Brain_Hippocampus_Middle_150_SE_07053	145	145	53305	1	0.0027202
NC_000001.11	44036048	44036193	RefSeqFE_enhancer_GeneID:110121214	NC_000001.11	44006036	44047585	dbSUPER_Brain_Mid_Frontal_Lobe_SE_08955	145	145	41549	1	0.00348986
NC_000001.11	44036048	44036193	RefSeqFE_enhancer_GeneID:110121214	NC_000001.11	44023001	44075394	dbSUPER_Ly4_SE_59695	145	145	52393	1	0.00276755
NC_000001.11	44036048	44036193	RefSeqFE_enhancer_GeneID:110121214	NC_000001.11	44029435	44050430	dbSUPER_K562_SE_40582	145	145	20995	1	0.00690641
NC_000001.11	44036111	44036129	RefSeqFE_transcriptional_cis_regulatory_region_GeneID:110121214	NC_000001.11	44034710	44037665	VISTA_enhancer_positive_hs1857	18	18	2955	1	0.00609137
NC_000001.11	44036111	44036129	RefSeqFE_transcriptional_cis_regulatory_region_GeneID:110121214	NC_000001.11	44035600	44037800	Ensembl104_CTCF_binding_site:ENSR00000355782	18	18	2200	1	0.00818182
NC_000001.11	44036111	44036129	RefSeqFE_transcriptional_cis_regulatory_region_GeneID:110121214	NC_000001.11	44035929	44036279	ENCODEcCRE_EH38E1343049_distal_enhancer	18	18	350	1	0.0514286
NC_000001.11	44036111	44036129	RefSeqFE_transcriptional_cis_regulatory_region_GeneID:110121214	NC_000001.11	44005469	44037601	dbSUPER_Brain_Anterior_Caudate_SE_04236	18	18	32132	1	0.000560189
NC_000001.11	44036111	44036129	RefSeqFE_transcriptional_cis_regulatory_region_GeneID:110121214	NC_000001.11	44013643	44037387	dbSUPER_Esophagus_SE_27482	18	18	23744	1	0.000758086
NC_000001.11	44036111	44036129	RefSeqFE_transcriptional_cis_regulatory_region_GeneID:110121214	NC_000001.11	43994902	44048866	dbSUPER_Brain_Cingulate_Gyrus_SE_05099	18	18	53964	1	0.000333556
NC_000001.11	44036111	44036129	RefSeqFE_transcriptional_cis_regulatory_region_GeneID:110121214	NC_000001.11	43995723	44049028	dbSUPER_Brain_Hippocampus_Middle_150_SE_07053	18	18	53305	1	0.000337679
NC_000001.11	44036111	44036129	RefSeqFE_transcriptional_cis_regulatory_region_GeneID:110121214	NC_000001.11	44006036	44047585	dbSUPER_Brain_Mid_Frontal_Lobe_SE_08955	18	18	41549	1	0.000433223
NC_000001.11	44036111	44036129	RefSeqFE_transcriptional_cis_regulatory_region_GeneID:110121214	NC_000001.11	44023001	44075394	dbSUPER_Ly4_SE_59695	18	18	52393	1	0.000343557
NC_000001.11	44036111	44036129	RefSeqFE_transcriptional_cis_regulatory_region_GeneID:110121214	NC_000001.11	44029435	44050430	dbSUPER_K562_SE_40582	18	18	20995	1	0.000857347
NC_000001.11	44213276	44213571	RefSeqFE_enhancer_GeneID:112590794	NC_000001.11	44212599	44214801	Ensembl104_promoter:ENSR00000005707	295	295	2202	1	0.133969
NC_000001.11	44213276	44213571	RefSeqFE_enhancer_GeneID:112590794	NC_000001.11	44213257	44213604	ENCODEcCRE_EH38E1343118_promoter	295	295	347	1	0.850144
NC_000001.11	44249747	44250457	RefSeqFE_enhancer_GeneID:110120642	NC_000001.11	44249400	44249800	Ensembl104_promoter_flanking_region:ENSR00000923491	53	710	400	0.0746479	0.1325
NC_000001.11	44249747	44250457	RefSeqFE_enhancer_GeneID:110120642	NC_000001.11	44249590	44249820	ENCODEcCRE_EH38E1343155_distal_enhancer	73	710	230	0.102817	0.317391
NC_000001.11	44249747	44250457	RefSeqFE_enhancer_GeneID:110120642	NC_000001.11	44249600	44250000	Ensembl104_CTCF_binding_site:ENSR00000355834	253	710	400	0.356338	0.6325
NC_000001.11	44249747	44250457	RefSeqFE_enhancer_GeneID:110120642	NC_000001.11	44249747	44250457	VISTA_enhancer_positive_hs277	710	710	710	1	1
NC_000001.11	44249747	44250457	RefSeqFE_enhancer_GeneID:110120642	NC_000001.11	44250100	44250394	ENCODEcCRE_EH38E1343156_distal_enhancer	294	710	294	0.414085	1
NC_000001.11	44249747	44250457	RefSeqFE_enhancer_GeneID:110120642	NC_000001.11	44250200	44250600	Ensembl104_promoter_flanking_region:ENSR00001167692	257	710	400	0.361972	0.6425
NC_000001.11	44249747	44250457	RefSeqFE_enhancer_GeneID:110120642	NC_000001.11	44237456	44294905	dbSUPER_Sigmoid_Colon_SE_50790	710	710	57449	1	0.0123588
NC_000001.11	44249747	44250457	RefSeqFE_enhancer_GeneID:110120642	NC_000001.11	44237635	44294830	dbSUPER_Colon_Crypt_1_SE_23389	710	710	57195	1	0.0124137
NC_000001.11	44249747	44250457	RefSeqFE_enhancer_GeneID:110120642	NC_000001.11	44237693	44294368	dbSUPER_Colon_Crypt_2_SE_24224	710	710	56675	1	0.0125276
NC_000001.11	44298096	44298391	RefSeqFE_enhancer_GeneID:112590795	NC_000001.11	44298082	44298368	ENCODEcCRE_EH38E1343216_distal_enhancer	272	295	286	0.922034	0.951049
NC_000001.11	44524151	44525477	RefSeqFE_enhancer_GeneID:110120644	NC_000001.11	44524151	44525477	VISTA_enhancer_positive_hs280	1326	1326	1326	1	1
NC_000001.11	44524151	44525477	RefSeqFE_enhancer_GeneID:110120644	NC_000001.11	44524211	44524513	ENCODEcCRE_EH38E1343401_distal_enhancer	302	1326	302	0.227753	1
NC_000001.11	44524151	44525477	RefSeqFE_enhancer_GeneID:110120644	NC_000001.11	44524569	44524728	ENCODEcCRE_EH38E1343402_distal_enhancer	159	1326	159	0.11991	1
NC_000001.11	44524151	44525477	RefSeqFE_enhancer_GeneID:110120644	NC_000001.11	44524798	44525057	ENCODEcCRE_EH38E1343403_distal_enhancer	259	1326	259	0.195324	1
NC_000001.11	44524151	44525477	RefSeqFE_enhancer_GeneID:110120644	NC_000001.11	44525060	44525410	ENCODEcCRE_EH38E1343404_distal_enhancer	350	1326	350	0.263952	1
NC_000001.11	44524151	44525477	RefSeqFE_enhancer_GeneID:110120644	NC_000001.11	44525200	44525400	Ensembl104_CTCF_binding_site:ENSR00000355901	200	1326	200	0.15083	1
NC_000001.11	44524151	44525477	RefSeqFE_enhancer_GeneID:110120644	NC_000001.11	44501644	44542907	dbSUPER_Brain_Mid_Frontal_Lobe_SE_08888	1326	1326	41263	1	0.0321353
NC_000001.11	44524151	44525477	RefSeqFE_enhancer_GeneID:110120644	NC_000001.11	44459606	44677037	dbSUPER_Brain_Hippocampus_Middle_SE_05770	1326	1326	217431	1	0.00609849
NC_000001.11	44524151	44525477	RefSeqFE_enhancer_GeneID:110120644	NC_000001.11	44463844	44675693	dbSUPER_Brain_Hippocampus_Middle_150_SE_06677	1326	1326	211849	1	0.00625918
NC_000001.11	44524151	44525477	RefSeqFE_enhancer_GeneID:110120644	NC_000001.11	44469710	44675531	dbSUPER_Brain_Cingulate_Gyrus_SE_04765	1326	1326	205821	1	0.00644249
NC_000001.11	44524151	44525477	RefSeqFE_enhancer_GeneID:110120644	NC_000001.11	44472072	44604434	dbSUPER_Brain_Anterior_Caudate_SE_03879	1326	1326	132362	1	0.010018
NC_000001.11	44524151	44525477	RefSeqFE_enhancer_GeneID:110120644	NC_000001.11	44472240	44675711	dbSUPER_Brain_Inferior_Temporal_Lobe_SE_07718	1326	1326	203471	1	0.0065169
NC_000001.11	44524151	44525477	RefSeqFE_enhancer_GeneID:110120644	NC_000001.11	44485094	44595744	dbSUPER_Brain_Angular_Gyrus_SE_03147	1326	1326	110650	1	0.0119837
NC_000001.11	45134436	45134731	RefSeqFE_enhancer_GeneID:112590799	NC_000001.11	45134276	45135000	Ensembl104_promoter_flanking_region:ENSR00001167748	295	295	724	1	0.407459
NC_000001.11	45134436	45134731	RefSeqFE_enhancer_GeneID:112590799	NC_000001.11	45134438	45134786	ENCODEcCRE_EH38E1343842_distal_enhancer	293	295	348	0.99322	0.841954
NC_000001.11	45491156	45491451	RefSeqFE_enhancer_GeneID:112590800	NC_000001.11	45489399	45492201	Ensembl104_promoter:ENSR00000356168	295	295	2802	1	0.105282
NC_000001.11	45491156	45491451	RefSeqFE_enhancer_GeneID:112590800	NC_000001.11	45491178	45491528	ENCODEcCRE_EH38E1344031_promoter	273	295	350	0.925424	0.78
NC_000001.11	46522175	46523248	RefSeqFE_transcriptional_cis_regulatory_region_GeneID:115801426	NC_000001.11	46519201	46524274	Ensembl104_promoter_flanking_region:ENSR00001167845	1073	1073	5073	1	0.211512
NC_000001.11	46522175	46523248	RefSeqFE_transcriptional_cis_regulatory_region_GeneID:115801426	NC_000001.11	46522288	46522443	ENCODEcCRE_EH38E1344766_distal_enhancer	155	1073	155	0.144455	1
NC_000001.11	46522175	46523248	RefSeqFE_transcriptional_cis_regulatory_region_GeneID:115801426	NC_000001.11	46522472	46522822	ENCODEcCRE_EH38E1344767_distal_enhancer	350	1073	350	0.326188	1
NC_000001.11	46522175	46523248	RefSeqFE_transcriptional_cis_regulatory_region_GeneID:115801426	NC_000001.11	46522990	46523203	ENCODEcCRE_EH38E1344768_distal_enhancer	213	1073	213	0.198509	1
NC_000001.11	47181247	47181392	RefSeqFE_enhancer_GeneID:111429629	NC_000001.11	47179593	47183266	dbSUPER_CD34_fetal_SE_12784	145	145	3673	1	0.0394773
NC_000001.11	47181247	47181392	RefSeqFE_enhancer_GeneID:111429629	NC_000001.11	47181187	47181536	ENCODEcCRE_EH38E1345074_distal_enhancer	145	145	349	1	0.415473
NC_000001.11	47181247	47181392	RefSeqFE_enhancer_GeneID:111429629	NC_000001.11	47178525	47194992	dbSUPER_K562_SE_40210	145	145	16467	1	0.00880549
NC_000001.11	47181247	47181392	RefSeqFE_enhancer_GeneID:111429629	NC_000001.11	47178813	47193400	dbSUPER_VACO_400_SE_57036	145	145	14587	1	0.00994036
NC_000001.11	47181310	47181328	RefSeqFE_transcriptional_cis_regulatory_region_GeneID:111429629	NC_000001.11	47179593	47183266	dbSUPER_CD34_fetal_SE_12784	18	18	3673	1	0.00490063
NC_000001.11	47181310	47181328	RefSeqFE_transcriptional_cis_regulatory_region_GeneID:111429629	NC_000001.11	47181187	47181536	ENCODEcCRE_EH38E1345074_distal_enhancer	18	18	349	1	0.0515759
NC_000001.11	47181310	47181328	RefSeqFE_transcriptional_cis_regulatory_region_GeneID:111429629	NC_000001.11	47178525	47194992	dbSUPER_K562_SE_40210	18	18	16467	1	0.0010931
NC_000001.11	47181310	47181328	RefSeqFE_transcriptional_cis_regulatory_region_GeneID:111429629	NC_000001.11	47178813	47193400	dbSUPER_VACO_400_SE_57036	18	18	14587	1	0.00123398
NC_000001.11	50110962	50111143	RefSeqFE_enhancer_GeneID:107992392	NC_000001.11	50108799	50112600	Ensembl104_promoter:ENSR00000357078	181	181	3801	1	0.047619
NC_000001.11	50110962	50111143	RefSeqFE_enhancer_GeneID:107992392	NC_000001.11	50110777	50111010	ENCODEcCRE_EH38E1346317_proximal_enhancer	48	181	233	0.265193	0.206009
NC_000001.11	50110962	50111143	RefSeqFE_enhancer_GeneID:107992392	NC_000001.11	50102407	50118821	dbSUPER_H2171_SE_33698	181	181	16414	1	0.0110272
NC_000001.11	50568873	50570617	RefSeqFE_enhancer_GeneID:110120607	NC_000001.11	50568600	50570800	Ensembl104_enhancer:ENSR00001168022	1744	1744	2200	1	0.792727
NC_000001.11	50568873	50570617	RefSeqFE_enhancer_GeneID:110120607	NC_000001.11	50568828	50569169	ENCODEcCRE_EH38E1346502_distal_enhancer	296	1744	341	0.169725	0.868035
NC_000001.11	50568873	50570617	RefSeqFE_enhancer_GeneID:110120607	NC_000001.11	50568873	50570617	VISTA_enhancer_positive_hs194	1744	1744	1744	1	1
NC_000001.11	50568873	50570617	RefSeqFE_enhancer_GeneID:110120607	NC_000001.11	50570032	50570273	ENCODEcCRE_EH38E1346504_distal_enhancer	241	1744	241	0.138188	1
NC_000001.11	50568873	50570617	RefSeqFE_enhancer_GeneID:110120607	NC_000001.11	50570276	50570477	ENCODEcCRE_EH38E1346505_distal_enhancer	201	1744	201	0.115252	1
NC_000001.11	50699522	50701114	RefSeqFE_enhancer_GeneID:110120609	NC_000001.11	50697401	50704199	Ensembl104_promoter_flanking_region:ENSR00000357187	1592	1592	6798	1	0.234187
NC_000001.11	50699522	50701114	RefSeqFE_enhancer_GeneID:110120609	NC_000001.11	50699522	50701114	VISTA_enhancer_positive_hs200	1592	1592	1592	1	1
NC_000001.11	50699522	50701114	RefSeqFE_enhancer_GeneID:110120609	NC_000001.11	50699817	50700167	ENCODEcCRE_EH38E1346553_distal_enhancer	350	1592	350	0.219849	1
NC_000001.11	50699522	50701114	RefSeqFE_enhancer_GeneID:110120609	NC_000001.11	50700180	50700526	ENCODEcCRE_EH38E1346554_distal_enhancer	346	1592	346	0.217337	1
NC_000001.11	50699522	50701114	RefSeqFE_enhancer_GeneID:110120609	NC_000001.11	50683772	50718214	dbSUPER_Brain_Hippocampus_Middle_150_SE_07354	1592	1592	34442	1	0.0462226
NC_000001.11	50873656	50873951	RefSeqFE_enhancer_GeneID:112590801	NC_000001.11	50873000	50874000	Ensembl104_CTCF_binding_site:ENSR00000251818	295	295	1000	1	0.295
NC_000001.11	50873656	50873951	RefSeqFE_enhancer_GeneID:112590801	NC_000001.11	50873484	50873834	ENCODEcCRE_EH38E1346613_distal_enhancer	178	295	350	0.60339	0.508571
NC_000001.11	50978762	50979272	RefSeqFE_transcriptional_cis_regulatory_region_GeneID:115801428	NC_000001.11	50975199	50982801	Ensembl104_promoter:ENSR00000006238	510	510	7602	1	0.0670876
NC_000001.11	50978762	50979272	RefSeqFE_transcriptional_cis_regulatory_region_GeneID:115801428	NC_000001.11	50978687	50979030	ENCODEcCRE_EH38E1346671_distal_enhancer	268	510	343	0.52549	0.781341
NC_000001.11	50978762	50979272	RefSeqFE_transcriptional_cis_regulatory_region_GeneID:115801428	NC_000001.11	50979207	50979374	ENCODEcCRE_EH38E1346672_distal_enhancer	65	510	167	0.127451	0.389222
NC_000001.11	50978762	50979272	RefSeqFE_transcriptional_cis_regulatory_region_GeneID:115801428	NC_000001.11	50954847	50985537	dbSUPER_Ly1_SE_58476	510	510	30690	1	0.0166178
NC_000001.11	50978762	50979272	RefSeqFE_transcriptional_cis_regulatory_region_GeneID:115801428	NC_000001.11	50957805	50981214	dbSUPER_CD4_Memory_Primary_7pool_SE_14614	510	510	23409	1	0.0217865
NC_000001.11	50978762	50979272	RefSeqFE_transcriptional_cis_regulatory_region_GeneID:115801428	NC_000001.11	50959214	50979477	dbSUPER_GLC16_SE_63211	510	510	20263	1	0.025169
NC_000001.11	50978762	50979272	RefSeqFE_transcriptional_cis_regulatory_region_GeneID:115801428	NC_000001.11	50966257	50985604	dbSUPER_Toledo_SE_61795	510	510	19347	1	0.0263607
NC_000001.11	50978762	50979272	RefSeqFE_transcriptional_cis_regulatory_region_GeneID:115801428	NC_000001.11	50966760	50980722	dbSUPER_CD8_Memory_7pool_SE_21099	510	510	13962	1	0.0365277
NC_000001.11	50978762	50979272	RefSeqFE_transcriptional_cis_regulatory_region_GeneID:115801428	NC_000001.11	50966933	50980018	dbSUPER_NHLF_SE_45135	510	510	13085	1	0.0389759
NC_000001.11	50978762	50979272	RefSeqFE_transcriptional_cis_regulatory_region_GeneID:115801428	NC_000001.11	50966947	50986186	dbSUPER_HeLa_SE_34815	510	510	19239	1	0.0265087
NC_000001.11	50978762	50979272	RefSeqFE_transcriptional_cis_regulatory_region_GeneID:115801428	NC_000001.11	50966969	50980555	dbSUPER_DND41_SE_25624	510	510	13586	1	0.0375386
NC_000001.11	50978762	50979272	RefSeqFE_transcriptional_cis_regulatory_region_GeneID:115801428	NC_000001.11	50967062	50979659	dbSUPER_K562_SE_40178	510	510	12597	1	0.0404858
NC_000001.11	50978762	50979272	RefSeqFE_transcriptional_cis_regulatory_region_GeneID:115801428	NC_000001.11	50967133	50979764	dbSUPER_DHL6_SE_60766	510	510	12631	1	0.0403769
NC_000001.11	50978762	50979272	RefSeqFE_transcriptional_cis_regulatory_region_GeneID:115801428	NC_000001.11	50967138	50979524	dbSUPER_Left_Ventricle_SE_41306	510	510	12386	1	0.0411755
NC_000001.11	50978762	50979272	RefSeqFE_transcriptional_cis_regulatory_region_GeneID:115801428	NC_000001.11	50967214	50979462	dbSUPER_Spleen_SE_53867	510	510	12248	1	0.0416395
NC_000001.11	50978762	50979272	RefSeqFE_transcriptional_cis_regulatory_region_GeneID:115801428	NC_000001.11	50967279	50979290	dbSUPER_Esophagus_SE_27425	510	510	12011	1	0.0424611
NC_000001.11	50978762	50979272	RefSeqFE_transcriptional_cis_regulatory_region_GeneID:115801428	NC_000001.11	50967393	50983472	dbSUPER_NCI-H69_SE_63439	510	510	16079	1	0.0317184
NC_000001.11	50978762	50979272	RefSeqFE_transcriptional_cis_regulatory_region_GeneID:115801428	NC_000001.11	50967401	50979270	dbSUPER_Right_Atrium_SE_49231	508	510	11869	0.996078	0.0428006
NC_000001.11	50978762	50979272	RefSeqFE_transcriptional_cis_regulatory_region_GeneID:115801428	NC_000001.11	50967434	50979299	dbSUPER_Lung_SE_43111	510	510	11865	1	0.0429836
NC_000001.11	50978762	50979272	RefSeqFE_transcriptional_cis_regulatory_region_GeneID:115801428	NC_000001.11	50967546	50980180	dbSUPER_HepG2_SE_35699	510	510	12634	1	0.0403673
NC_000001.11	50978762	50979272	RefSeqFE_transcriptional_cis_regulatory_region_GeneID:115801428	NC_000001.11	50967905	50979202	dbSUPER_Thymus_SE_55626	440	510	11297	0.862745	0.0389484
NC_000001.11	50978762	50979272	RefSeqFE_transcriptional_cis_regulatory_region_GeneID:115801428	NC_000001.11	50954081	51002426	dbSUPER_Ly4_SE_59703	510	510	48345	1	0.0105492
NC_000001.11	50978762	50979272	RefSeqFE_transcriptional_cis_regulatory_region_GeneID:115801428	NC_000001.11	50966288	51021487	dbSUPER_Adipose_Nuclei_SE_00232	510	510	55199	1	0.0092393
NC_000001.11	51878716	51879011	RefSeqFE_enhancer_GeneID:112590802	NC_000001.11	51874006	51880179	dbSUPER_K562_SE_40186	295	295	6173	1	0.0477888
NC_000001.11	51878716	51879011	RefSeqFE_enhancer_GeneID:112590802	NC_000001.11	51874308	51880148	dbSUPER_CD8_Memory_7pool_SE_21294	295	295	5840	1	0.0505137
NC_000001.11	51878716	51879011	RefSeqFE_enhancer_GeneID:112590802	NC_000001.11	51874597	51880202	dbSUPER_CD34_Primary_RO01536_SE_13826	295	295	5605	1	0.0526316
NC_000001.11	51878716	51879011	RefSeqFE_enhancer_GeneID:112590802	NC_000001.11	51874599	51880400	Ensembl104_promoter:ENSR00000006342	295	295	5801	1	0.0508533
NC_000001.11	51878716	51879011	RefSeqFE_enhancer_GeneID:112590802	NC_000001.11	51878708	51879058	ENCODEcCRE_EH38E1347244_promoter	295	295	350	1	0.842857
NC_000001.11	51878716	51879011	RefSeqFE_enhancer_GeneID:112590802	NC_000001.11	51866877	51880119	dbSUPER_CD4_Memory_Primary_7pool_SE_15088	295	295	13242	1	0.0222776
NC_000001.11	52007236	52007531	RefSeqFE_enhancer_GeneID:112590803	NC_000001.11	52007310	52007568	ENCODEcCRE_EH38E1347348_distal_enhancer	221	295	258	0.749153	0.856589
NC_000001.11	52651996	52652291	RefSeqFE_enhancer_GeneID:112590804	NC_000001.11	52651912	52652320	Ensembl104_TF_binding_site:ENSR00000006414	295	295	408	1	0.723039
NC_000001.11	52651996	52652291	RefSeqFE_enhancer_GeneID:112590804	NC_000001.11	52651935	52652279	ENCODEcCRE_EH38E1347662_distal_enhancer	283	295	344	0.959322	0.822674
NC_000001.11	52651996	52652291	RefSeqFE_enhancer_GeneID:112590804	NC_000001.11	52628752	52661311	dbSUPER_CD20_SE_11041	295	295	32559	1	0.00906047
NC_000001.11	52651996	52652291	RefSeqFE_silencer_GeneID:112590804	NC_000001.11	52651912	52652320	Ensembl104_TF_binding_site:ENSR00000006414	295	295	408	1	0.723039
NC_000001.11	52651996	52652291	RefSeqFE_silencer_GeneID:112590804	NC_000001.11	52651935	52652279	ENCODEcCRE_EH38E1347662_distal_enhancer	283	295	344	0.959322	0.822674
NC_000001.11	52651996	52652291	RefSeqFE_silencer_GeneID:112590804	NC_000001.11	52628752	52661311	dbSUPER_CD20_SE_11041	295	295	32559	1	0.00906047
NC_000001.11	53120605	53125383	RefSeqFE_enhancer_GeneID:114827846	NC_000001.11	53120605	53125383	VISTA_enhancer_positive_hs2585	4778	4778	4778	1	1
NC_000001.11	53120605	53125383	RefSeqFE_enhancer_GeneID:114827846	NC_000001.11	53120715	53120943	ENCODEcCRE_EH38E1347954_distal_enhancer	228	4778	228	0.0477187	1
NC_000001.11	53120605	53125383	RefSeqFE_enhancer_GeneID:114827846	NC_000001.11	53120800	53121000	Ensembl104_CTCF_binding_site:ENSR00000357736	200	4778	200	0.0418585	1
NC_000001.11	53120605	53125383	RefSeqFE_enhancer_GeneID:114827846	NC_000001.11	53121394	53121602	ENCODEcCRE_EH38E1347956_distal_enhancer	208	4778	208	0.0435329	1
NC_000001.11	53120605	53125383	RefSeqFE_enhancer_GeneID:114827846	NC_000001.11	53121637	53121976	ENCODEcCRE_EH38E1347957_distal_enhancer	339	4778	339	0.0709502	1
NC_000001.11	53120605	53125383	RefSeqFE_enhancer_GeneID:114827846	NC_000001.11	53121800	53122000	Ensembl104_CTCF_binding_site:ENSR00000357737	200	4778	200	0.0418585	1
NC_000001.11	53120605	53125383	RefSeqFE_enhancer_GeneID:114827846	NC_000001.11	53122103	53122431	ENCODEcCRE_EH38E1347958_distal_enhancer	328	4778	328	0.068648	1
NC_000001.11	53120605	53125383	RefSeqFE_enhancer_GeneID:114827846	NC_000001.11	53122513	53122846	ENCODEcCRE_EH38E1347959_distal_enhancer	333	4778	333	0.0696944	1
NC_000001.11	53120605	53125383	RefSeqFE_enhancer_GeneID:114827846	NC_000001.11	53122957	53123219	ENCODEcCRE_EH38E1347960_distal_enhancer	262	4778	262	0.0548347	1
NC_000001.11	53120605	53125383	RefSeqFE_enhancer_GeneID:114827846	NC_000001.11	53123000	53123200	Ensembl104_CTCF_binding_site:ENSR00000924391	200	4778	200	0.0418585	1
NC_000001.11	53120605	53125383	RefSeqFE_enhancer_GeneID:114827846	NC_000001.11	53123262	53123420	ENCODEcCRE_EH38E1347961_distal_enhancer	158	4778	158	0.0330682	1
NC_000001.11	53120605	53125383	RefSeqFE_enhancer_GeneID:114827846	NC_000001.11	53123635	53123982	ENCODEcCRE_EH38E1347962_distal_enhancer	347	4778	347	0.0726245	1
NC_000001.11	53120605	53125383	RefSeqFE_enhancer_GeneID:114827846	NC_000001.11	53123984	53124147	ENCODEcCRE_EH38E1347963_distal_enhancer	163	4778	163	0.0341147	1
NC_000001.11	53120605	53125383	RefSeqFE_enhancer_GeneID:114827846	NC_000001.11	53124193	53124539	ENCODEcCRE_EH38E1347964_distal_enhancer	346	4778	346	0.0724152	1
NC_000001.11	53120605	53125383	RefSeqFE_enhancer_GeneID:114827846	NC_000001.11	53124541	53124885	ENCODEcCRE_EH38E1347965_distal_enhancer	344	4778	344	0.0719967	1
NC_000001.11	53120605	53125383	RefSeqFE_enhancer_GeneID:114827846	NC_000001.11	53125154	53125504	ENCODEcCRE_EH38E1347966_distal_enhancer	229	4778	350	0.047928	0.654286
NC_000001.11	53120605	53125383	RefSeqFE_enhancer_GeneID:114827846	NC_000001.11	53103737	53147305	dbSUPER_Stomach_Smooth_Muscle_SE_54938	4778	4778	43568	1	0.109668
NC_000001.11	53120605	53125383	RefSeqFE_enhancer_GeneID:114827846	NC_000001.11	53107080	53148714	dbSUPER_NHLF_SE_45023	4778	4778	41634	1	0.114762
NC_000001.11	53120605	53125383	RefSeqFE_enhancer_GeneID:114827846	NC_000001.11	53107212	53174736	dbSUPER_H2171_SE_33504	4778	4778	67524	1	0.07076
NC_000001.11	53120605	53125383	RefSeqFE_enhancer_GeneID:114827846	NC_000001.11	53108756	53147890	dbSUPER_NHDF-Ad_SE_44441	4778	4778	39134	1	0.122093
NC_000001.11	53120605	53125383	RefSeqFE_enhancer_GeneID:114827846	NC_000001.11	53111690	53147953	dbSUPER_HSMMtube_SE_37738	4778	4778	36263	1	0.13176
NC_000001.11	53120605	53125383	RefSeqFE_enhancer_GeneID:114827846	NC_000001.11	53115926	53147436	dbSUPER_NCI-H82_SE_63312	4778	4778	31510	1	0.151634
NC_000001.11	53120605	53125383	RefSeqFE_enhancer_GeneID:114827846	NC_000001.11	53081814	53121927	dbSUPER_RPMI-8402_SE_50019	1322	4778	40113	0.276685	0.0329569
NC_000001.11	53393376	53393671	RefSeqFE_enhancer_GeneID:112590805	NC_000001.11	53392200	53394800	Ensembl104_CTCF_binding_site:ENSR00000251892	295	295	2600	1	0.113462
NC_000001.11	53393376	53393671	RefSeqFE_enhancer_GeneID:112590805	NC_000001.11	53393200	53393999	Ensembl104_promoter_flanking_region:ENSR00000924434	295	295	799	1	0.369212
NC_000001.11	53393376	53393671	RefSeqFE_enhancer_GeneID:112590805	NC_000001.11	53393338	53393663	ENCODEcCRE_EH38E1348193_CTCF-only	287	295	325	0.972881	0.883077
NC_000001.11	53889735	53890030	RefSeqFE_enhancer_GeneID:112590806	NC_000001.11	53888599	53891001	Ensembl104_promoter:ENSR00000006571	295	295	2402	1	0.122814
NC_000001.11	53889735	53890030	RefSeqFE_enhancer_GeneID:112590806	NC_000001.11	53889705	53890055	ENCODEcCRE_EH38E1348523_promoter	295	295	350	1	0.842857
NC_000001.11	53957235	53957530	RefSeqFE_enhancer_GeneID:112590807	NC_000001.11	53955801	53957901	Ensembl104_promoter_flanking_region:ENSR00000006579	295	295	2100	1	0.140476
NC_000001.11	53957235	53957530	RefSeqFE_enhancer_GeneID:112590807	NC_000001.11	53957232	53957580	ENCODEcCRE_EH38E1348596_distal_enhancer	295	295	348	1	0.847701
NC_000001.11	54053235	54053530	RefSeqFE_enhancer_GeneID:112590808	NC_000001.11	54051199	54055001	Ensembl104_promoter:ENSR00000006585	295	295	3802	1	0.0775907
NC_000001.11	54053235	54053530	RefSeqFE_enhancer_GeneID:112590808	NC_000001.11	54053248	54053598	ENCODEcCRE_EH38E1348650_promoter	282	295	350	0.955932	0.805714
NC_000001.11	54459372	54463153	RefSeqFE_enhancer_GeneID:110121126	NC_000001.11	54459157	54459471	ENCODEcCRE_EH38E1349013_distal_enhancer	99	3781	314	0.0261835	0.315287
NC_000001.11	54459372	54463153	RefSeqFE_enhancer_GeneID:110121126	NC_000001.11	54459799	54460081	ENCODEcCRE_EH38E1349014_distal_enhancer	282	3781	282	0.0745834	1
NC_000001.11	54459372	54463153	RefSeqFE_enhancer_GeneID:110121126	NC_000001.11	54460427	54460767	ENCODEcCRE_EH38E1349015_distal_enhancer	340	3781	340	0.0899233	1
NC_000001.11	54459372	54463153	RefSeqFE_enhancer_GeneID:110121126	NC_000001.11	54462321	54462527	ENCODEcCRE_EH38E1349018_distal_enhancer	206	3781	206	0.0544829	1
NC_000001.11	54459372	54463153	RefSeqFE_enhancer_GeneID:110121126	NC_000001.11	54459273	54489149	dbSUPER_Jurkat_SE_39825	3781	3781	29876	1	0.126556
NC_000001.11	54459372	54463153	RefSeqFE_enhancer_GeneID:110121126	NC_000001.11	54459372	54463153	VISTA_enhancer_positive_hs1487	3781	3781	3781	1	1
NC_000001.11	55774430	55776762	RefSeqFE_enhancer_GeneID:110121161	NC_000001.11	55774430	55776762	VISTA_enhancer_positive_hs1622	2332	2332	2332	1	1
NC_000001.11	55774430	55776762	RefSeqFE_enhancer_GeneID:110121161	NC_000001.11	55774456	55774923	Ensembl104_open_chromatin_region:ENSR00000006863	467	2332	467	0.200257	1
NC_000001.11	55774430	55776762	RefSeqFE_enhancer_GeneID:110121161	NC_000001.11	55774975	55775345	Ensembl104_open_chromatin_region:ENSR00000924742	370	2332	370	0.158662	1
NC_000001.11	56448936	56449231	RefSeqFE_enhancer_GeneID:112590809	NC_000001.11	56448769	56454000	Ensembl104_promoter_flanking_region:ENSR00000924821	295	295	5231	1	0.0563946
NC_000001.11	56448936	56449231	RefSeqFE_enhancer_GeneID:112590809	NC_000001.11	56448903	56449248	FANTOM5_enhancer_chr1:56448903-56449248	295	295	345	1	0.855072
NC_000001.11	56448936	56449231	RefSeqFE_enhancer_GeneID:112590809	NC_000001.11	56448965	56449257	ENCODEcCRE_EH38E1350439_distal_enhancer	266	295	292	0.901695	0.910959
NC_000001.11	56461396	56461691	RefSeqFE_enhancer_GeneID:112590810	NC_000001.11	56461200	56461600	Ensembl104_CTCF_binding_site:ENSR00000358625	204	295	400	0.691525	0.51
NC_000001.11	56461396	56461691	RefSeqFE_enhancer_GeneID:112590810	NC_000001.11	56461326	56461657	ENCODEcCRE_EH38E1350451_distal_enhancer	261	295	331	0.884746	0.78852
NC_000001.11	56461396	56461691	RefSeqFE_enhancer_GeneID:112590810	NC_000001.11	56461399	56461601	Ensembl104_enhancer:ENSR00000358624	202	295	202	0.684746	1
NC_000001.11	58883096	58883391	RefSeqFE_enhancer_GeneID:112590812	NC_000001.11	58883365	58883715	ENCODEcCRE_EH38E1351716_distal_enhancer	26	295	350	0.0881356	0.0742857
NC_000001.11	58883096	58883391	RefSeqFE_enhancer_GeneID:112590812	NC_000001.11	58857623	58904504	dbSUPER_VACO_400_SE_56970	295	295	46881	1	0.00629253
NC_000001.11	58883096	58883391	RefSeqFE_enhancer_GeneID:112590812	NC_000001.11	58858091	58943609	dbSUPER_Colon_Crypt_1_SE_23453	295	295	85518	1	0.00344957
NC_000001.11	58883096	58883391	RefSeqFE_enhancer_GeneID:112590812	NC_000001.11	58858137	58943145	dbSUPER_Colon_Crypt_2_SE_24502	295	295	85008	1	0.00347026
NC_000001.11	58883096	58883391	RefSeqFE_enhancer_GeneID:112590812	NC_000001.11	58869188	58934354	dbSUPER_Fetal_Intestine_Large_SE_28563	295	295	65166	1	0.0045269
NC_000001.11	58883096	58883391	RefSeqFE_enhancer_GeneID:112590812	NC_000001.11	58869378	58943446	dbSUPER_Fetal_Intestine_SE_27652	295	295	74068	1	0.00398283
NC_000001.11	58883096	58883391	RefSeqFE_enhancer_GeneID:112590812	NC_000001.11	58869461	58943351	dbSUPER_Sigmoid_Colon_SE_50404	295	295	73890	1	0.00399242
NC_000001.11	58883096	58883391	RefSeqFE_enhancer_GeneID:112590812	NC_000001.11	58873140	58905257	dbSUPER_Lung_SE_42871	295	295	32117	1	0.00918517
NC_000001.11	58883096	58883391	RefSeqFE_enhancer_GeneID:112590812	NC_000001.11	58873871	58905049	dbSUPER_Duodenum_Smooth_Muscle_SE_26435	295	295	31178	1	0.0094618
NC_000001.11	58883096	58883391	RefSeqFE_enhancer_GeneID:112590812	NC_000001.11	58874307	58943595	dbSUPER_Small_Intestine_SE_52597	295	295	69288	1	0.00425759
NC_000001.11	58883096	58883391	RefSeqFE_enhancer_GeneID:112590812	NC_000001.11	58874390	58906011	dbSUPER_Adipose_Nuclei_SE_00647	295	295	31621	1	0.00932924
NC_000001.11	58883096	58883391	RefSeqFE_enhancer_GeneID:112590812	NC_000001.11	58874399	58904562	dbSUPER_HepG2_SE_35530	295	295	30163	1	0.00978019
NC_000001.11	58883096	58883391	RefSeqFE_enhancer_GeneID:112590812	NC_000001.11	58880769	58910430	dbSUPER_HUVEC_SE_38425	295	295	29661	1	0.00994572
NC_000001.11	58883096	58883391	RefSeqFE_enhancer_GeneID:112590812	NC_000001.11	58880815	58904337	dbSUPER_K562_SE_40058	295	295	23522	1	0.0125415
NC_000001.11	58883096	58883391	RefSeqFE_enhancer_GeneID:112590812	NC_000001.11	58881770	58905611	dbSUPER_Psoas_Muscle_SE_48526	295	295	23841	1	0.0123736
NC_000001.11	58883096	58883391	RefSeqFE_enhancer_GeneID:112590812	NC_000001.11	58882407	58904571	dbSUPER_Spleen_SE_54380	295	295	22164	1	0.0133099
NC_000001.11	58883096	58883391	RefSeqFE_enhancer_GeneID:112590812	NC_000001.11	58814541	58887603	dbSUPER_u87_SE_55736	295	295	73062	1	0.00403767
NC_000001.11	58883096	58883391	RefSeqFE_enhancer_GeneID:112590812	NC_000001.11	58841213	58905364	dbSUPER_Gastric_SE_31595	295	295	64151	1	0.00459853
NC_000001.11	59056652	59058420	RefSeqFE_enhancer_GeneID:110121125	NC_000001.11	59056001	59059599	Ensembl104_promoter_flanking_region:ENSR00001168519	1768	1768	3598	1	0.491384
NC_000001.11	59056652	59058420	RefSeqFE_enhancer_GeneID:110121125	NC_000001.11	59056652	59058420	VISTA_enhancer_positive_hs1485	1768	1768	1768	1	1
NC_000001.11	59056652	59058420	RefSeqFE_enhancer_GeneID:110121125	NC_000001.11	59057200	59057800	Ensembl104_CTCF_binding_site:ENSR00000359221	600	1768	600	0.339367	1
NC_000001.11	59056652	59058420	RefSeqFE_enhancer_GeneID:110121125	NC_000001.11	59057209	59057557	ENCODEcCRE_EH38E1351878_proximal_enhancer	348	1768	348	0.196833	1
NC_000001.11	59056652	59058420	RefSeqFE_enhancer_GeneID:110121125	NC_000001.11	59057298	59057546	FANTOM5_enhancer_chr1:59057298-59057546	248	1768	248	0.140271	1
NC_000001.11	59056652	59058420	RefSeqFE_enhancer_GeneID:110121125	NC_000001.11	59057855	59058075	ENCODEcCRE_EH38E1351879_proximal_enhancer	220	1768	220	0.124434	1
NC_000001.11	59056652	59058420	RefSeqFE_enhancer_GeneID:110121125	NC_000001.11	59007952	59063836	dbSUPER_u87_SE_55991	1768	1768	55884	1	0.031637
NC_000001.11	59730916	59731211	RefSeqFE_enhancer_GeneID:112590814	NC_000001.11	59729601	59734600	Ensembl104_promoter_flanking_region:ENSR00001168555	295	295	4999	1	0.0590118
NC_000001.11	59730916	59731211	RefSeqFE_enhancer_GeneID:112590814	NC_000001.11	59730894	59731122	FANTOM5_enhancer_chr1:59730894-59731122	206	295	228	0.698305	0.903509
NC_000001.11	59730916	59731211	RefSeqFE_enhancer_GeneID:112590814	NC_000001.11	59730967	59731305	ENCODEcCRE_EH38E1352412_distal_enhancer	244	295	338	0.827119	0.721893
NC_000001.11	59730916	59731211	RefSeqFE_enhancer_GeneID:112590814	NC_000001.11	59668981	59744479	dbSUPER_Skeletal_Muscle_SE_51437	295	295	75498	1	0.00390739
NC_000001.11	59730916	59731211	RefSeqFE_enhancer_GeneID:112590814	NC_000001.11	59729465	59751349	dbSUPER_IMR90_SE_39126	295	295	21884	1	0.0134802
NC_000001.11	61141586	61141731	RefSeqFE_enhancer_GeneID:111501769	NC_000001.11	61138601	61144399	Ensembl104_promoter_flanking_region:ENSR00000925234	145	145	5798	1	0.0250086
NC_000001.11	61141586	61141731	RefSeqFE_enhancer_GeneID:111501769	NC_000001.11	61138722	61144621	dbSUPER_NHEK_SE_65083	145	145	5899	1	0.0245804
NC_000001.11	61141586	61141731	RefSeqFE_enhancer_GeneID:111501769	NC_000001.11	61141608	61141957	ENCODEcCRE_EH38E1353165_distal_enhancer	123	145	349	0.848276	0.352436
NC_000001.11	61141586	61141731	RefSeqFE_enhancer_GeneID:111501769	NC_000001.11	61119825	61199635	dbSUPER_Brain_Hippocampus_Middle_150_SE_07078	145	145	79810	1	0.00181681
NC_000001.11	61141586	61141731	RefSeqFE_enhancer_GeneID:111501769	NC_000001.11	61075766	61157569	dbSUPER_Brain_Cingulate_Gyrus_SE_05006	145	145	81803	1	0.00177255
NC_000001.11	61141586	61141731	RefSeqFE_enhancer_GeneID:111501769	NC_000001.11	61075945	61204354	dbSUPER_Brain_Anterior_Caudate_SE_03913	145	145	128409	1	0.0011292
NC_000001.11	61141586	61141731	RefSeqFE_enhancer_GeneID:111501769	NC_000001.11	61075951	61282760	dbSUPER_Adipose_Nuclei_SE_00027	145	145	206809	1	0.00070113
NC_000001.11	61141586	61141731	RefSeqFE_enhancer_GeneID:111501769	NC_000001.11	61075953	61158342	dbSUPER_Brain_Inferior_Temporal_Lobe_SE_07985	145	145	82389	1	0.00175994
NC_000001.11	61141586	61141731	RefSeqFE_enhancer_GeneID:111501769	NC_000001.11	61075980	61143102	dbSUPER_Skeletal_Muscle_SE_51356	145	145	67122	1	0.00216025
NC_000001.11	61141586	61141731	RefSeqFE_enhancer_GeneID:111501769	NC_000001.11	61076118	61142182	dbSUPER_Fetal_Muscle_SE_29665	145	145	66064	1	0.00219484
NC_000001.11	61141586	61141731	RefSeqFE_enhancer_GeneID:111501769	NC_000001.11	61076146	61204283	dbSUPER_Duodenum_Smooth_Muscle_SE_25851	145	145	128137	1	0.0011316
NC_000001.11	61141586	61141731	RefSeqFE_enhancer_GeneID:111501769	NC_000001.11	61079300	61191840	dbSUPER_Left_Ventricle_SE_40989	145	145	112540	1	0.00128843
NC_000001.11	61141586	61141731	RefSeqFE_enhancer_GeneID:111501769	NC_000001.11	61139230	61210987	dbSUPER_Aorta_SE_02024	145	145	71757	1	0.00202071
NC_000001.11	61141653	61141664	RefSeqFE_transcriptional_cis_regulatory_region_GeneID:111501769	NC_000001.11	61138601	61144399	Ensembl104_promoter_flanking_region:ENSR00000925234	11	11	5798	1	0.00189721
NC_000001.11	61141653	61141664	RefSeqFE_transcriptional_cis_regulatory_region_GeneID:111501769	NC_000001.11	61138722	61144621	dbSUPER_NHEK_SE_65083	11	11	5899	1	0.00186472
NC_000001.11	61141653	61141664	RefSeqFE_transcriptional_cis_regulatory_region_GeneID:111501769	NC_000001.11	61141608	61141957	ENCODEcCRE_EH38E1353165_distal_enhancer	11	11	349	1	0.0315186
NC_000001.11	61141653	61141664	RefSeqFE_transcriptional_cis_regulatory_region_GeneID:111501769	NC_000001.11	61119825	61199635	dbSUPER_Brain_Hippocampus_Middle_150_SE_07078	11	11	79810	1	0.000137827
NC_000001.11	61141653	61141664	RefSeqFE_transcriptional_cis_regulatory_region_GeneID:111501769	NC_000001.11	61075766	61157569	dbSUPER_Brain_Cingulate_Gyrus_SE_05006	11	11	81803	1	0.000134469
NC_000001.11	61141653	61141664	RefSeqFE_transcriptional_cis_regulatory_region_GeneID:111501769	NC_000001.11	61075945	61204354	dbSUPER_Brain_Anterior_Caudate_SE_03913	11	11	128409	1	8.56638e-05
NC_000001.11	61141653	61141664	RefSeqFE_transcriptional_cis_regulatory_region_GeneID:111501769	NC_000001.11	61075951	61282760	dbSUPER_Adipose_Nuclei_SE_00027	11	11	206809	1	5.31892e-05
NC_000001.11	61141653	61141664	RefSeqFE_transcriptional_cis_regulatory_region_GeneID:111501769	NC_000001.11	61075953	61158342	dbSUPER_Brain_Inferior_Temporal_Lobe_SE_07985	11	11	82389	1	0.000133513
NC_000001.11	61141653	61141664	RefSeqFE_transcriptional_cis_regulatory_region_GeneID:111501769	NC_000001.11	61075980	61143102	dbSUPER_Skeletal_Muscle_SE_51356	11	11	67122	1	0.000163881
NC_000001.11	61141653	61141664	RefSeqFE_transcriptional_cis_regulatory_region_GeneID:111501769	NC_000001.11	61076118	61142182	dbSUPER_Fetal_Muscle_SE_29665	11	11	66064	1	0.000166505
NC_000001.11	61141653	61141664	RefSeqFE_transcriptional_cis_regulatory_region_GeneID:111501769	NC_000001.11	61076146	61204283	dbSUPER_Duodenum_Smooth_Muscle_SE_25851	11	11	128137	1	8.58456e-05
NC_000001.11	61141653	61141664	RefSeqFE_transcriptional_cis_regulatory_region_GeneID:111501769	NC_000001.11	61079300	61191840	dbSUPER_Left_Ventricle_SE_40989	11	11	112540	1	9.7743e-05
NC_000001.11	61141653	61141664	RefSeqFE_transcriptional_cis_regulatory_region_GeneID:111501769	NC_000001.11	61139230	61210987	dbSUPER_Aorta_SE_02024	11	11	71757	1	0.000153295
NC_000001.11	61452122	61454518	RefSeqFE_enhancer_GeneID:110121050	NC_000001.11	61441702	61456223	dbSUPER_Fetal_Muscle_SE_30708	2396	2396	14521	1	0.165002
NC_000001.11	61452122	61454518	RefSeqFE_enhancer_GeneID:110121050	NC_000001.11	61452122	61454518	VISTA_enhancer_positive_hs1309	2396	2396	2396	1	1
NC_000001.11	61452122	61454518	RefSeqFE_enhancer_GeneID:110121050	NC_000001.11	61452642	61452936	ENCODEcCRE_EH38E1353474_distal_enhancer	294	2396	294	0.122705	1
NC_000001.11	61452122	61454518	RefSeqFE_enhancer_GeneID:110121050	NC_000001.11	61453147	61453510	FANTOM5_enhancer_chr1:61453147-61453510	363	2396	363	0.151503	1
NC_000001.11	61452122	61454518	RefSeqFE_enhancer_GeneID:110121050	NC_000001.11	61453148	61453423	ENCODEcCRE_EH38E1353475_distal_enhancer	275	2396	275	0.114775	1
NC_000001.11	61452122	61454518	RefSeqFE_enhancer_GeneID:110121050	NC_000001.11	61453200	61454000	Ensembl104_CTCF_binding_site:ENSR00000359770	800	2396	800	0.33389	1
NC_000001.11	61452122	61454518	RefSeqFE_enhancer_GeneID:110121050	NC_000001.11	61453426	61453648	ENCODEcCRE_EH38E1353476_distal_enhancer	222	2396	222	0.0926544	1
NC_000001.11	61452122	61454518	RefSeqFE_enhancer_GeneID:110121050	NC_000001.11	61453724	61454064	ENCODEcCRE_EH38E1353477_distal_enhancer	340	2396	340	0.141903	1
NC_000001.11	61452122	61454518	RefSeqFE_enhancer_GeneID:110121050	NC_000001.11	61420680	61455048	dbSUPER_Right_Atrium_SE_49252	2396	2396	34368	1	0.069716
NC_000001.11	61579787	61582487	RefSeqFE_enhancer_GeneID:110121124	NC_000001.11	61579787	61582487	VISTA_enhancer_positive_hs1484	2700	2700	2700	1	1
NC_000001.11	61579787	61582487	RefSeqFE_enhancer_GeneID:110121124	NC_000001.11	61579868	61580146	Ensembl104_open_chromatin_region:ENSR00001168640	278	2700	278	0.102963	1
NC_000001.11	61579787	61582487	RefSeqFE_enhancer_GeneID:110121124	NC_000001.11	61580200	61580800	Ensembl104_promoter_flanking_region:ENSR00000359810	600	2700	600	0.222222	1
NC_000001.11	61579787	61582487	RefSeqFE_enhancer_GeneID:110121124	NC_000001.11	61581305	61581578	Ensembl104_open_chromatin_region:ENSR00001168641	273	2700	273	0.101111	1
NC_000001.11	61587760	61590236	RefSeqFE_enhancer_GeneID:110121108	NC_000001.11	61587760	61590236	VISTA_enhancer_positive_hs1450	2476	2476	2476	1	1
NC_000001.11	61587760	61590236	RefSeqFE_enhancer_GeneID:110121108	NC_000001.11	61588200	61589600	Ensembl104_CTCF_binding_site:ENSR00000252162	1400	2476	1400	0.565428	1
NC_000001.11	61587760	61590236	RefSeqFE_enhancer_GeneID:110121108	NC_000001.11	61588401	61589799	Ensembl104_promoter_flanking_region:ENSR00000359813	1398	2476	1398	0.56462	1
NC_000001.11	61587760	61590236	RefSeqFE_enhancer_GeneID:110121108	NC_000001.11	61588735	61589051	ENCODEcCRE_EH38E1353535_distal_enhancer	316	2476	316	0.127625	1
NC_000001.11	61587760	61590236	RefSeqFE_enhancer_GeneID:110121108	NC_000001.11	61589070	61589419	ENCODEcCRE_EH38E1353536_distal_enhancer	349	2476	349	0.140953	1
NC_000001.11	61587760	61590236	RefSeqFE_enhancer_GeneID:110121108	NC_000001.11	61589425	61589653	ENCODEcCRE_EH38E1353537_distal_enhancer	228	2476	228	0.092084	1
NC_000001.11	61587760	61590236	RefSeqFE_enhancer_GeneID:110121108	NC_000001.11	61589800	61590000	Ensembl104_CTCF_binding_site:ENSR00000359814	200	2476	200	0.0807754	1
NC_000001.11	61587760	61590236	RefSeqFE_enhancer_GeneID:110121108	NC_000001.11	61590200	61591200	Ensembl104_promoter_flanking_region:ENSR00000925317	36	2476	1000	0.0145396	0.036
NC_000001.11	62903677	62905223	RefSeqFE_enhancer_GeneID:110120659	NC_000001.11	62903677	62905223	VISTA_enhancer_positive_hs311	1546	1546	1546	1	1
NC_000001.11	62977862	62979213	RefSeqFE_enhancer_GeneID:110120599	NC_000001.11	62977399	62978200	Ensembl104_enhancer:ENSR00000925474	338	1351	801	0.250185	0.421973
NC_000001.11	62977862	62979213	RefSeqFE_enhancer_GeneID:110120599	NC_000001.11	62977862	62979213	VISTA_enhancer_positive_hs168	1351	1351	1351	1	1
NC_000001.11	62977862	62979213	RefSeqFE_enhancer_GeneID:110120599	NC_000001.11	62978084	62978414	ENCODEcCRE_EH38E1354230_distal_enhancer	330	1351	330	0.244264	1
NC_000001.11	62977862	62979213	RefSeqFE_enhancer_GeneID:110120599	NC_000001.11	62978730	62978893	Ensembl104_open_chromatin_region:ENSR00000360088	163	1351	163	0.120651	1
NC_000001.11	62998610	63000046	RefSeqFE_enhancer_GeneID:110120600	NC_000001.11	62998610	63000046	VISTA_enhancer_positive_hs169	1436	1436	1436	1	1
NC_000001.11	63199547	63200451	RefSeqFE_enhancer_GeneID:110120763	NC_000001.11	63198980	63201031	Ensembl104_promoter_flanking_region:ENSR00000925493	904	904	2051	1	0.440761
NC_000001.11	63199547	63200451	RefSeqFE_enhancer_GeneID:110120763	NC_000001.11	63199547	63200451	VISTA_enhancer_positive_hs764	904	904	904	1	1
NC_000001.11	63199547	63200451	RefSeqFE_enhancer_GeneID:110120763	NC_000001.11	63199659	63200001	ENCODEcCRE_EH38E1354292_distal_enhancer	342	904	342	0.378319	1
NC_000001.11	64006716	64007011	RefSeqFE_enhancer_GeneID:112590815	NC_000001.11	64003401	64007400	Ensembl104_promoter_flanking_region:ENSR00000360321	295	295	3999	1	0.0737684
NC_000001.11	64006716	64007011	RefSeqFE_enhancer_GeneID:112590815	NC_000001.11	64006635	64006980	ENCODEcCRE_EH38E1354843_distal_enhancer	264	295	345	0.894915	0.765217
NC_000001.11	64006716	64007011	RefSeqFE_enhancer_GeneID:112590815	NC_000001.11	64005912	64045084	dbSUPER_Osteoblasts_SE_46608	295	295	39172	1	0.00753089
NC_000001.11	64915905	64916200	RefSeqFE_enhancer_GeneID:112590816	NC_000001.11	64915875	64916224	ENCODEcCRE_EH38E1355418_distal_enhancer	295	295	349	1	0.845272
NC_000001.11	64915905	64916200	RefSeqFE_enhancer_GeneID:112590816	NC_000001.11	64915963	64916143	FANTOM5_enhancer_chr1:64915963-64916143	180	295	180	0.610169	1
NC_000001.11	64915905	64916200	RefSeqFE_enhancer_GeneID:112590816	NC_000001.11	64889052	64967618	dbSUPER_Adipose_Nuclei_SE_00278	295	295	78566	1	0.0037548
NC_000001.11	64915905	64916200	RefSeqFE_enhancer_GeneID:112590816	NC_000001.11	64897523	64936123	dbSUPER_Osteoblasts_SE_46185	295	295	38600	1	0.00764249
NC_000001.11	64915905	64916200	RefSeqFE_enhancer_GeneID:112590816	NC_000001.11	64828291	64967762	dbSUPER_CD20_SE_11209	295	295	139471	1	0.00211514
NC_000001.11	64934305	64934600	RefSeqFE_enhancer_GeneID:112590817	NC_000001.11	64933981	64934521	FANTOM5_enhancer_chr1:64933981-64934521	216	295	540	0.732203	0.4
NC_000001.11	64934305	64934600	RefSeqFE_enhancer_GeneID:112590817	NC_000001.11	64933999	64934401	Ensembl104_promoter:ENSR00000360514	96	295	402	0.325424	0.238806
NC_000001.11	64934305	64934600	RefSeqFE_enhancer_GeneID:112590817	NC_000001.11	64934307	64934656	ENCODEcCRE_EH38E1355439_distal_enhancer	293	295	349	0.99322	0.839542
NC_000001.11	64934305	64934600	RefSeqFE_enhancer_GeneID:112590817	NC_000001.11	64889052	64967618	dbSUPER_Adipose_Nuclei_SE_00278	295	295	78566	1	0.0037548
NC_000001.11	64934305	64934600	RefSeqFE_enhancer_GeneID:112590817	NC_000001.11	64897523	64936123	dbSUPER_Osteoblasts_SE_46185	295	295	38600	1	0.00764249
NC_000001.11	64934305	64934600	RefSeqFE_enhancer_GeneID:112590817	NC_000001.11	64916965	64967770	dbSUPER_CD4p_CD25-_Il17-_PMAstim_Th_SE_18759	295	295	50805	1	0.00580652
NC_000001.11	64934305	64934600	RefSeqFE_enhancer_GeneID:112590817	NC_000001.11	64828291	64967762	dbSUPER_CD20_SE_11209	295	295	139471	1	0.00211514
NC_000001.11	65412545	65412840	RefSeqFE_enhancer_GeneID:112590818	NC_000001.11	65412000	65413201	Ensembl104_enhancer:ENSR00000360635	295	295	1201	1	0.245629
NC_000001.11	65412545	65412840	RefSeqFE_enhancer_GeneID:112590818	NC_000001.11	65412490	65412821	ENCODEcCRE_EH38E1355794_distal_enhancer	276	295	331	0.935593	0.833837
NC_000001.11	65412545	65412840	RefSeqFE_enhancer_GeneID:112590818	NC_000001.11	65410525	65438172	dbSUPER_K562_SE_40139	295	295	27647	1	0.0106702
NC_000001.11	65412545	65412840	RefSeqFE_enhancer_GeneID:112590818	NC_000001.11	65411144	65431472	dbSUPER_CD34_Primary_RO01536_SE_13785	295	295	20328	1	0.014512
NC_000001.11	65412545	65412840	RefSeqFE_enhancer_GeneID:112590818	NC_000001.11	65412003	65432085	dbSUPER_Osteoblasts_SE_46388	295	295	20082	1	0.0146898
NC_000001.11	67682609	67683102	RefSeqFE_transcriptional_cis_regulatory_region_GeneID:115801429	NC_000001.11	67682366	67689368	dbSUPER_NHLF_SE_45351	493	493	7002	1	0.0704085
NC_000001.11	67682609	67683102	RefSeqFE_transcriptional_cis_regulatory_region_GeneID:115801429	NC_000001.11	67682702	67682976	ENCODEcCRE_EH38E1357164_distal_enhancer	274	493	274	0.555781	1
NC_000001.11	67682609	67683102	RefSeqFE_transcriptional_cis_regulatory_region_GeneID:115801429	NC_000001.11	67682999	67683401	Ensembl104_promoter:ENSR00001168946	103	493	402	0.208925	0.256219
NC_000001.11	67682609	67683102	RefSeqFE_transcriptional_cis_regulatory_region_GeneID:115801429	NC_000001.11	67679197	67690306	dbSUPER_NHEK_SE_64600	493	493	11109	1	0.0443784
NC_000001.11	67682609	67683102	RefSeqFE_transcriptional_cis_regulatory_region_GeneID:115801429	NC_000001.11	67681922	67690286	dbSUPER_HMEC_SE_36223	493	493	8364	1	0.0589431
NC_000001.11	67682609	67683102	RefSeqFE_transcriptional_cis_regulatory_region_GeneID:115801429	NC_000001.11	67682517	67714013	dbSUPER_K562_SE_40089	493	493	31496	1	0.0156528
NC_000001.11	67682609	67683102	RefSeqFE_transcriptional_cis_regulatory_region_GeneID:115801429	NC_000001.11	67682583	67725943	dbSUPER_Fetal_Intestine_Large_SE_29142	493	493	43360	1	0.0113699
NC_000001.11	67682609	67683102	RefSeqFE_transcriptional_cis_regulatory_region_GeneID:115801429	NC_000001.11	67673946	67772267	dbSUPER_HUVEC_SE_38054	493	493	98321	1	0.00501419
NC_000001.11	67682609	67683102	RefSeqFE_transcriptional_cis_regulatory_region_GeneID:115801429	NC_000001.11	67682503	67772005	dbSUPER_Astrocytes_SE_02387	493	493	89502	1	0.00550826
NC_000001.11	67682609	67683102	RefSeqFE_transcriptional_cis_regulatory_region_GeneID:115801429	NC_000001.11	67682795	67768059	dbSUPER_Fetal_Intestine_SE_27725	307	493	85264	0.622718	0.00360058
NC_000001.11	70156605	70156900	RefSeqFE_enhancer_GeneID:112590819	NC_000001.11	70156561	70156926	Ensembl104_open_chromatin_region:ENSR00001169039	295	295	365	1	0.808219
NC_000001.11	70674897	70676314	RefSeqFE_transcriptional_cis_regulatory_region_GeneID:115801430	NC_000001.11	70674841	70676599	Ensembl104_promoter_flanking_region:ENSR00000361569	1417	1417	1758	1	0.80603
NC_000001.11	70674897	70676314	RefSeqFE_transcriptional_cis_regulatory_region_GeneID:115801430	NC_000001.11	70675013	70675210	ENCODEcCRE_EH38E1358357_distal_enhancer	197	1417	197	0.139026	1
NC_000001.11	70674897	70676314	RefSeqFE_transcriptional_cis_regulatory_region_GeneID:115801430	NC_000001.11	70675287	70675577	ENCODEcCRE_EH38E1358358_distal_enhancer	290	1417	290	0.204658	1
NC_000001.11	70674897	70676314	RefSeqFE_transcriptional_cis_regulatory_region_GeneID:115801430	NC_000001.11	70675787	70676137	ENCODEcCRE_EH38E1358359_distal_enhancer	350	1417	350	0.247001	1
NC_000001.11	75092044	75092339	RefSeqFE_enhancer_GeneID:112590820	NC_000001.11	75092000	75092800	Ensembl104_enhancer:ENSR00000362145	295	295	800	1	0.36875
NC_000001.11	75092044	75092339	RefSeqFE_enhancer_GeneID:112590820	NC_000001.11	75092156	75092492	ENCODEcCRE_EH38E1359500_distal_enhancer	183	295	336	0.620339	0.544643
NC_000001.11	79075661	79083449	RefSeqFE_enhancer_GeneID:110121238	NC_000001.11	79075661	79083449	VISTA_enhancer_positive_hs1989	7788	7788	7788	1	1
NC_000001.11	79075661	79083449	RefSeqFE_enhancer_GeneID:110121238	NC_000001.11	79078801	79081199	Ensembl104_promoter_flanking_region:ENSR00000362837	2398	7788	2398	0.30791	1
NC_000001.11	79075661	79083449	RefSeqFE_enhancer_GeneID:110121238	NC_000001.11	79079518	79079731	ENCODEcCRE_EH38E1361265_distal_enhancer	213	7788	213	0.0273498	1
NC_000001.11	79075661	79083449	RefSeqFE_enhancer_GeneID:110121238	NC_000001.11	79079830	79080180	ENCODEcCRE_EH38E1361266_distal_enhancer	350	7788	350	0.0449409	1
NC_000001.11	79075661	79083449	RefSeqFE_enhancer_GeneID:110121238	NC_000001.11	79081800	79082800	Ensembl104_enhancer:ENSR00000926625	1000	7788	1000	0.128403	1
NC_000001.11	82879682	82880588	RefSeqFE_enhancer_GeneID:110120683	NC_000001.11	82879682	82880588	VISTA_enhancer_positive_hs442	906	906	906	1	1
NC_000001.11	82879682	82880588	RefSeqFE_enhancer_GeneID:110120683	NC_000001.11	82879800	82880200	Ensembl104_enhancer:ENSR00000926847	400	906	400	0.441501	1
NC_000001.11	82879682	82880588	RefSeqFE_enhancer_GeneID:110120683	NC_000001.11	82880311	82880516	ENCODEcCRE_EH38E1362544_distal_enhancer	205	906	205	0.226269	1
NC_000001.11	87329508	87331054	RefSeqFE_enhancer_GeneID:110120776	NC_000001.11	87327199	87337201	Ensembl104_promoter:ENSR00000009408	1546	1546	10002	1	0.154569
NC_000001.11	87329508	87331054	RefSeqFE_enhancer_GeneID:110120776	NC_000001.11	87327300	87336971	dbSUPER_Tonsil_SE_63112	1546	1546	9671	1	0.159859
NC_000001.11	87329508	87331054	RefSeqFE_enhancer_GeneID:110120776	NC_000001.11	87327491	87335883	dbSUPER_Esophagus_SE_27597	1546	1546	8392	1	0.184223
NC_000001.11	87329508	87331054	RefSeqFE_enhancer_GeneID:110120776	NC_000001.11	87327503	87337280	dbSUPER_Spleen_SE_54053	1546	1546	9777	1	0.158126
NC_000001.11	87329508	87331054	RefSeqFE_enhancer_GeneID:110120776	NC_000001.11	87329474	87329681	ENCODEcCRE_EH38E1364868_proximal_enhancer	173	1546	207	0.111902	0.835749
NC_000001.11	87329508	87331054	RefSeqFE_enhancer_GeneID:110120776	NC_000001.11	87329508	87331054	VISTA_enhancer_positive_hs809	1546	1546	1546	1	1
NC_000001.11	87329508	87331054	RefSeqFE_enhancer_GeneID:110120776	NC_000001.11	87329698	87330036	ENCODEcCRE_EH38E1364869_proximal_enhancer	338	1546	338	0.218629	1
NC_000001.11	87329508	87331054	RefSeqFE_enhancer_GeneID:110120776	NC_000001.11	87330182	87330390	ENCODEcCRE_EH38E1364870_proximal_enhancer	208	1546	208	0.134541	1
NC_000001.11	87329508	87331054	RefSeqFE_enhancer_GeneID:110120776	NC_000001.11	87330395	87330587	ENCODEcCRE_EH38E1364871_proximal_enhancer	192	1546	192	0.124191	1
NC_000001.11	87329508	87331054	RefSeqFE_enhancer_GeneID:110120776	NC_000001.11	87330662	87330863	ENCODEcCRE_EH38E1364872_proximal_enhancer	201	1546	201	0.130013	1
NC_000001.11	87329508	87331054	RefSeqFE_enhancer_GeneID:110120776	NC_000001.11	87331036	87331246	ENCODEcCRE_EH38E1364873_proximal_enhancer	18	1546	210	0.0116429	0.0857143
NC_000001.11	87329508	87331054	RefSeqFE_enhancer_GeneID:110120776	NC_000001.11	87325820	87336404	dbSUPER_DHL6_SE_60759	1546	1546	10584	1	0.14607
NC_000001.11	87329508	87331054	RefSeqFE_enhancer_GeneID:110120776	NC_000001.11	87325903	87337935	dbSUPER_MM1S_SE_44088	1546	1546	12032	1	0.128491
NC_000001.11	87355937	87357399	RefSeqFE_enhancer_GeneID:110120602	NC_000001.11	87355821	87356134	ENCODEcCRE_EH38E1364906_distal_enhancer	197	1462	313	0.134747	0.629393
NC_000001.11	87355937	87357399	RefSeqFE_enhancer_GeneID:110120602	NC_000001.11	87355937	87357399	VISTA_enhancer_positive_hs174	1462	1462	1462	1	1
NC_000001.11	87355937	87357399	RefSeqFE_enhancer_GeneID:110120602	NC_000001.11	87356109	87357227	VISTA_enhancer_positive_hs322	1118	1462	1118	0.764706	1
NC_000001.11	87356109	87357227	RefSeqFE_enhancer_GeneID:110120602	NC_000001.11	87355821	87356134	ENCODEcCRE_EH38E1364906_distal_enhancer	25	1118	313	0.0223614	0.0798722
NC_000001.11	87356109	87357227	RefSeqFE_enhancer_GeneID:110120602	NC_000001.11	87355937	87357399	VISTA_enhancer_positive_hs174	1118	1118	1462	1	0.764706
NC_000001.11	87356109	87357227	RefSeqFE_enhancer_GeneID:110120602	NC_000001.11	87356109	87357227	VISTA_enhancer_positive_hs322	1118	1118	1118	1	1
NC_000001.11	87560179	87561520	RefSeqFE_enhancer_GeneID:110121010	NC_000001.11	87560179	87561520	VISTA_enhancer_positive_hs1161	1341	1341	1341	1	1
NC_000001.11	87560179	87561520	RefSeqFE_enhancer_GeneID:110121010	NC_000001.11	87560576	87561400	Ensembl104_promoter_flanking_region:ENSR00001169643	824	1341	824	0.614467	1
NC_000001.11	87560179	87561520	RefSeqFE_enhancer_GeneID:110121010	NC_000001.11	87560983	87561315	ENCODEcCRE_EH38E1365023_distal_enhancer	332	1341	332	0.247576	1
NC_000001.11	87599357	87600847	RefSeqFE_enhancer_GeneID:110121031	NC_000001.11	87598399	87601201	Ensembl104_enhancer:ENSR00000927260	1490	1490	2802	1	0.531763
NC_000001.11	87599357	87600847	RefSeqFE_enhancer_GeneID:110121031	NC_000001.11	87599357	87600847	VISTA_enhancer_positive_hs1217	1490	1490	1490	1	1
NC_000001.11	87599357	87600847	RefSeqFE_enhancer_GeneID:110121031	NC_000001.11	87600232	87600464	ENCODEcCRE_EH38E1365048_distal_enhancer	232	1490	232	0.155705	1
NC_000001.11	87642400	87643713	RefSeqFE_enhancer_GeneID:110120959	NC_000001.11	87642400	87643713	VISTA_enhancer_positive_hs1002	1313	1313	1313	1	1
NC_000001.11	87642400	87643713	RefSeqFE_enhancer_GeneID:110120959	NC_000001.11	87642451	87642793	ENCODEcCRE_EH38E1365057_distal_enhancer	342	1313	342	0.260472	1
NC_000001.11	87642400	87643713	RefSeqFE_enhancer_GeneID:110120959	NC_000001.11	87642874	87643224	ENCODEcCRE_EH38E1365058_distal_enhancer	350	1313	350	0.266565	1
NC_000001.11	88070035	88072707	RefSeqFE_enhancer_GeneID:110121023	NC_000001.11	88070035	88072707	VISTA_enhancer_positive_hs1198	2672	2672	2672	1	1
NC_000001.11	88070035	88072707	RefSeqFE_enhancer_GeneID:110121023	NC_000001.11	88071028	88071315	ENCODEcCRE_EH38E1365305_distal_enhancer	287	2672	287	0.10741	1
NC_000001.11	88150003	88151244	RefSeqFE_enhancer_GeneID:110120795	NC_000001.11	88150003	88151244	VISTA_enhancer_positive_hs878	1241	1241	1241	1	1
NC_000001.11	88150003	88151244	RefSeqFE_enhancer_GeneID:110120795	NC_000001.11	88150287	88150632	ENCODEcCRE_EH38E1365321_distal_enhancer	345	1241	345	0.278002	1
NC_000001.11	88150003	88151244	RefSeqFE_enhancer_GeneID:110120795	NC_000001.11	88150600	88150800	Ensembl104_enhancer:ENSR00000927310	200	1241	200	0.16116	1
NC_000001.11	88220392	88222057	RefSeqFE_enhancer_GeneID:110120990	NC_000001.11	88220392	88222057	VISTA_enhancer_positive_hs1107	1665	1665	1665	1	1
NC_000001.11	88220392	88222057	RefSeqFE_enhancer_GeneID:110120990	NC_000001.11	88220600	88220800	Ensembl104_enhancer:ENSR00000927315	200	1665	200	0.12012	1
NC_000001.11	88220392	88222057	RefSeqFE_enhancer_GeneID:110120990	NC_000001.11	88221035	88221292	ENCODEcCRE_EH38E1365353_CTCF-only	257	1665	257	0.154354	1
NC_000001.11	88220392	88222057	RefSeqFE_enhancer_GeneID:110120990	NC_000001.11	88221421	88221817	Ensembl104_open_chromatin_region:ENSR00000009475	396	1665	396	0.237838	1
NC_000001.11	88461112	88462825	RefSeqFE_enhancer_GeneID:110120664	NC_000001.11	88461016	88461366	ENCODEcCRE_EH38E1365424_distal_enhancer	254	1713	350	0.148278	0.725714
NC_000001.11	88461112	88462825	RefSeqFE_enhancer_GeneID:110120664	NC_000001.11	88461112	88462825	VISTA_enhancer_positive_hs327	1713	1713	1713	1	1
NC_000001.11	88461112	88462825	RefSeqFE_enhancer_GeneID:110120664	NC_000001.11	88461591	88461794	ENCODEcCRE_EH38E1365425_distal_enhancer	203	1713	203	0.118506	1
NC_000001.11	88461112	88462825	RefSeqFE_enhancer_GeneID:110120664	NC_000001.11	88461800	88463800	Ensembl104_promoter:ENSR00001169678	1025	1713	2000	0.598365	0.5125
NC_000001.11	88461112	88462825	RefSeqFE_enhancer_GeneID:110120664	NC_000001.11	88462119	88462447	ENCODEcCRE_EH38E1365426_distal_enhancer	328	1713	328	0.191477	1
NC_000001.11	88461112	88462825	RefSeqFE_enhancer_GeneID:110120664	NC_000001.11	88462533	88462881	ENCODEcCRE_EH38E1365427_distal_enhancer	292	1713	348	0.170461	0.83908
NC_000001.11	88647305	88647600	RefSeqFE_enhancer_GeneID:112590824	NC_000001.11	88647001	88650599	Ensembl104_promoter_flanking_region:ENSR00001169686	295	295	3598	1	0.08199
NC_000001.11	88647305	88647600	RefSeqFE_enhancer_GeneID:112590824	NC_000001.11	88647123	88647483	FANTOM5_enhancer_chr1:88647123-88647483	178	295	360	0.60339	0.494444
NC_000001.11	89622929	89623224	RefSeqFE_silencer_GeneID:113939989	NC_000001.11	89622800	89623400	Ensembl104_CTCF_binding_site:ENSR00000364731	295	295	600	1	0.491667
NC_000001.11	89622929	89623224	RefSeqFE_silencer_GeneID:113939989	NC_000001.11	89622911	89623249	Ensembl104_open_chromatin_region:ENSR00001169733	295	295	338	1	0.872781
NC_000001.11	89622929	89623224	RefSeqFE_silencer_GeneID:113939989	NC_000001.11	89622927	89623277	ENCODEcCRE_EH38E1366014_distal_enhancer	295	295	350	1	0.842857
NC_000001.11	89622929	89623224	RefSeqFE_silencer_GeneID:113939989	NC_000001.11	89563254	89634984	dbSUPER_Brain_Cingulate_Gyrus_SE_05152	295	295	71730	1	0.00411264
NC_000001.11	89622929	89623224	RefSeqFE_silencer_GeneID:113939989	NC_000001.11	89602449	89636378	dbSUPER_Tonsil_SE_62901	295	295	33929	1	0.00869463
NC_000001.11	89622929	89623224	RefSeqFE_silencer_GeneID:113939989	NC_000001.11	89602499	89636830	dbSUPER_CD4_Memory_Primary_7pool_SE_14747	295	295	34331	1	0.00859282
NC_000001.11	89622929	89623224	RefSeqFE_silencer_GeneID:113939989	NC_000001.11	89615745	89634895	dbSUPER_Brain_Hippocampus_Middle_150_SE_07452	295	295	19150	1	0.0154047
NC_000001.11	89622929	89623224	RefSeqFE_silencer_GeneID:113939989	NC_000001.11	89597895	89701194	dbSUPER_CD4p_CD25-_Il17-_PMAstim_Th_SE_18268	295	295	103299	1	0.00285579
NC_000001.11	90840004	90841658	RefSeqFE_enhancer_GeneID:110120716	NC_000001.11	90839961	90840160	ENCODEcCRE_EH38E1366695_DNase-H3K4me3	156	1654	199	0.0943168	0.78392
NC_000001.11	90840004	90841658	RefSeqFE_enhancer_GeneID:110120716	NC_000001.11	90840004	90841658	VISTA_enhancer_positive_hs612	1654	1654	1654	1	1
NC_000001.11	90840004	90841658	RefSeqFE_enhancer_GeneID:110120716	NC_000001.11	90841552	90841891	ENCODEcCRE_EH38E1366699_distal_enhancer	106	1654	339	0.0640871	0.312684
NC_000001.11	90840004	90841658	RefSeqFE_enhancer_GeneID:110120716	NC_000001.11	90841600	90841936	Ensembl104_promoter_flanking_region:ENSR00001169786	58	1654	336	0.0350665	0.172619
NC_000001.11	91732531	91732826	RefSeqFE_enhancer_GeneID:112590826	NC_000001.11	91729600	91733800	Ensembl104_promoter_flanking_region:ENSR00000009760	295	295	4200	1	0.0702381
NC_000001.11	91732531	91732826	RefSeqFE_enhancer_GeneID:112590826	NC_000001.11	91732351	91732558	ENCODEcCRE_EH38E1367138_distal_enhancer	27	295	207	0.0915254	0.130435
NC_000001.11	91732531	91732826	RefSeqFE_enhancer_GeneID:112590826	NC_000001.11	91732510	91732832	FANTOM5_enhancer_chr1:91732510-91732832	295	295	322	1	0.916149
NC_000001.11	91732531	91732826	RefSeqFE_enhancer_GeneID:112590826	NC_000001.11	91732560	91732909	ENCODEcCRE_EH38E1367139_distal_enhancer	266	295	349	0.901695	0.762178
NC_000001.11	91732531	91732826	RefSeqFE_enhancer_GeneID:112590826	NC_000001.11	91696638	91738060	dbSUPER_Osteoblasts_SE_46247	295	295	41422	1	0.00712182
NC_000001.11	91732531	91732826	RefSeqFE_enhancer_GeneID:112590826	NC_000001.11	91682669	91892683	dbSUPER_Adipose_Nuclei_SE_00014	295	295	210014	1	0.00140467
NC_000001.11	91732531	91732826	RefSeqFE_enhancer_GeneID:112590826	NC_000001.11	91682972	91765681	dbSUPER_Lung_SE_42700	295	295	82709	1	0.00356672
NC_000001.11	91732531	91732826	RefSeqFE_enhancer_GeneID:112590826	NC_000001.11	91683728	91762985	dbSUPER_Duodenum_Smooth_Muscle_SE_25884	295	295	79257	1	0.00372207
NC_000001.11	91732531	91732826	RefSeqFE_enhancer_GeneID:112590826	NC_000001.11	91683783	91865047	dbSUPER_Fetal_Muscle_SE_29597	295	295	181264	1	0.00162746
NC_000001.11	91732531	91732826	RefSeqFE_enhancer_GeneID:112590826	NC_000001.11	91684353	91763897	dbSUPER_Right_Atrium_SE_49045	295	295	79544	1	0.00370864
NC_000001.11	91732531	91732826	RefSeqFE_enhancer_GeneID:112590826	NC_000001.11	91684442	91765355	dbSUPER_Left_Ventricle_SE_41368	295	295	80913	1	0.00364589
NC_000001.11	91732531	91732826	RefSeqFE_enhancer_GeneID:112590826	NC_000001.11	91686633	91766353	dbSUPER_Adrenal_Gland_SE_01167	295	295	79720	1	0.00370045
NC_000001.11	91732531	91732826	RefSeqFE_enhancer_GeneID:112590826	NC_000001.11	91688615	91819844	dbSUPER_Ovary_SE_46678	295	295	131229	1	0.00224798
NC_000001.11	91732531	91732826	RefSeqFE_enhancer_GeneID:112590826	NC_000001.11	91690016	91763949	dbSUPER_Bladder_SE_02965	295	295	73933	1	0.0039901
NC_000001.11	91732531	91732826	RefSeqFE_enhancer_GeneID:112590826	NC_000001.11	91711694	91771372	dbSUPER_Stomach_Smooth_Muscle_SE_54682	295	295	59678	1	0.0049432
NC_000001.11	91732531	91732826	RefSeqFE_enhancer_GeneID:112590826	NC_000001.11	91712824	91778048	dbSUPER_Esophagus_SE_27588	295	295	65224	1	0.00452288
NC_000001.11	93079031	93079326	RefSeqFE_enhancer_GeneID:112590827	NC_000001.11	93078199	93082801	Ensembl104_promoter:ENSR00000009901	295	295	4602	1	0.0641026
NC_000001.11	93079031	93079326	RefSeqFE_enhancer_GeneID:112590827	NC_000001.11	93079022	93079372	ENCODEcCRE_EH38E1367949_promoter	295	295	350	1	0.842857
NC_000001.11	93979952	93980247	RefSeqFE_enhancer_GeneID:112590828	NC_000001.11	93979774	93980119	ENCODEcCRE_EH38E1368611_distal_enhancer	167	295	345	0.566102	0.484058
NC_000001.11	93979952	93980247	RefSeqFE_enhancer_GeneID:112590828	NC_000001.11	93980140	93980442	ENCODEcCRE_EH38E1368612_distal_enhancer	107	295	302	0.362712	0.354305
NC_000001.11	93979952	93980247	RefSeqFE_enhancer_GeneID:112590828	NC_000001.11	93960223	93995494	dbSUPER_HMEC_SE_36784	295	295	35271	1	0.00836381
NC_000001.11	93979952	93980247	RefSeqFE_enhancer_GeneID:112590828	NC_000001.11	93976401	93981399	Ensembl104_promoter_flanking_region:ENSR00000365624	295	295	4998	1	0.0590236
NC_000001.11	95084408	95085129	RefSeqFE_transcriptional_cis_regulatory_region_GeneID:115801431	NC_000001.11	95082984	95086305	VISTA_enhancer_negative_hs2322	721	721	3321	1	0.217103
NC_000001.11	95084408	95085129	RefSeqFE_transcriptional_cis_regulatory_region_GeneID:115801431	NC_000001.11	95084001	95089199	Ensembl104_promoter_flanking_region:ENSR00000365921	721	721	5198	1	0.138707
NC_000001.11	95084408	95085129	RefSeqFE_transcriptional_cis_regulatory_region_GeneID:115801431	NC_000001.11	95084200	95085400	Ensembl104_CTCF_binding_site:ENSR00000253121	721	721	1200	1	0.600833
NC_000001.11	95084408	95085129	RefSeqFE_transcriptional_cis_regulatory_region_GeneID:115801431	NC_000001.11	95084473	95084789	ENCODEcCRE_EH38E1369627_distal_enhancer	316	721	316	0.43828	1
NC_000001.11	95084408	95085129	RefSeqFE_transcriptional_cis_regulatory_region_GeneID:115801431	NC_000001.11	95084512	95095029	dbSUPER_CD34_adult_SE_12672	617	721	10517	0.855756	0.0586669
NC_000001.11	95085195	95085844	RefSeqFE_transcriptional_cis_regulatory_region_GeneID:115801432	NC_000001.11	95082984	95086305	VISTA_enhancer_negative_hs2322	649	649	3321	1	0.195423
NC_000001.11	95085195	95085844	RefSeqFE_transcriptional_cis_regulatory_region_GeneID:115801432	NC_000001.11	95084001	95089199	Ensembl104_promoter_flanking_region:ENSR00000365921	649	649	5198	1	0.124856
NC_000001.11	95085195	95085844	RefSeqFE_transcriptional_cis_regulatory_region_GeneID:115801432	NC_000001.11	95084200	95085400	Ensembl104_CTCF_binding_site:ENSR00000253121	205	649	1200	0.315871	0.170833
NC_000001.11	95085195	95085844	RefSeqFE_transcriptional_cis_regulatory_region_GeneID:115801432	NC_000001.11	95085297	95085450	ENCODEcCRE_EH38E1369629_distal_enhancer	153	649	153	0.235747	1
NC_000001.11	95085195	95085844	RefSeqFE_transcriptional_cis_regulatory_region_GeneID:115801432	NC_000001.11	95085469	95085819	ENCODEcCRE_EH38E1369630_distal_enhancer	350	649	350	0.539291	1
NC_000001.11	95085195	95085844	RefSeqFE_transcriptional_cis_regulatory_region_GeneID:115801432	NC_000001.11	95084512	95095029	dbSUPER_CD34_adult_SE_12672	649	649	10517	1	0.0617096
NC_000001.11	95087021	95087486	RefSeqFE_transcriptional_cis_regulatory_region_GeneID:115801433	NC_000001.11	95084001	95089199	Ensembl104_promoter_flanking_region:ENSR00000365921	465	465	5198	1	0.0894575
NC_000001.11	95087021	95087486	RefSeqFE_transcriptional_cis_regulatory_region_GeneID:115801433	NC_000001.11	95086893	95087192	ENCODEcCRE_EH38E1369633_distal_enhancer	171	465	299	0.367742	0.571906
NC_000001.11	95087021	95087486	RefSeqFE_transcriptional_cis_regulatory_region_GeneID:115801433	NC_000001.11	95087194	95087537	ENCODEcCRE_EH38E1369634_distal_enhancer	292	465	343	0.627957	0.851312
NC_000001.11	95087021	95087486	RefSeqFE_transcriptional_cis_regulatory_region_GeneID:115801433	NC_000001.11	95084512	95095029	dbSUPER_CD34_adult_SE_12672	465	465	10517	1	0.0442141
NC_000001.11	95111052	95111329	RefSeqFE_transcriptional_cis_regulatory_region_GeneID:115801434	NC_000001.11	95110847	95111380	Ensembl104_TF_binding_site:ENSR00000927938	277	277	533	1	0.5197
NC_000001.11	95111052	95111329	RefSeqFE_transcriptional_cis_regulatory_region_GeneID:115801434	NC_000001.11	95111032	95111368	ENCODEcCRE_EH38E1369644_distal_enhancer	277	277	336	1	0.824405
NC_000001.11	95115579	95116107	RefSeqFE_transcriptional_cis_regulatory_region_GeneID:115801436	NC_000001.11	95115639	95115985	ENCODEcCRE_EH38E1369649_proximal_enhancer	346	528	346	0.655303	1
NC_000001.11	95115579	95116107	RefSeqFE_transcriptional_cis_regulatory_region_GeneID:115801436	NC_000001.11	95115800	95116000	Ensembl104_CTCF_binding_site:ENSR00000927942	200	528	200	0.378788	1
NC_000001.11	97144934	97146185	RefSeqFE_enhancer_GeneID:110120739	NC_000001.11	97143200	97146399	Ensembl104_promoter_flanking_region:ENSR00000928076	1251	1251	3199	1	0.39106
NC_000001.11	97144934	97146185	RefSeqFE_enhancer_GeneID:110120739	NC_000001.11	97144934	97146185	VISTA_enhancer_positive_hs671	1251	1251	1251	1	1
NC_000001.11	97144934	97146185	RefSeqFE_enhancer_GeneID:110120739	NC_000001.11	97145429	97145777	ENCODEcCRE_EH38E1370375_distal_enhancer	348	1251	348	0.278177	1
NC_000001.11	100583072	100583217	RefSeqFE_enhancer_GeneID:111556158	NC_000001.11	100582971	100583297	ENCODEcCRE_EH38E1371790_distal_enhancer	145	145	326	1	0.444785
NC_000001.11	100583072	100583217	RefSeqFE_enhancer_GeneID:111556158	NC_000001.11	100583000	100583400	Ensembl104_enhancer:ENSR00001170226	145	145	400	1	0.3625
NC_000001.11	100583138	100583152	RefSeqFE_transcriptional_cis_regulatory_region_GeneID:111556158	NC_000001.11	100582971	100583297	ENCODEcCRE_EH38E1371790_distal_enhancer	14	14	326	1	0.0429448
NC_000001.11	100583138	100583152	RefSeqFE_transcriptional_cis_regulatory_region_GeneID:111556158	NC_000001.11	100583000	100583400	Ensembl104_enhancer:ENSR00001170226	14	14	400	1	0.035
NC_000001.11	108200266	108200561	RefSeqFE_enhancer_GeneID:112577470	NC_000001.11	108200155	108200505	ENCODEcCRE_EH38E1374092_promoter	239	295	350	0.810169	0.682857
NC_000001.11	108200266	108200561	RefSeqFE_enhancer_GeneID:112577470	NC_000001.11	108198127	108201247	dbSUPER_Colon_Crypt_3_SE_25242	295	295	3120	1	0.0945513
NC_000001.11	108200266	108200561	RefSeqFE_enhancer_GeneID:112577470	NC_000001.11	108198199	108201601	Ensembl104_promoter:ENSR00000010962	295	295	3402	1	0.0867137
NC_000001.11	108533624	108534200	RefSeqFE_transcriptional_cis_regulatory_region_GeneID:115801437	NC_000001.11	108533001	108534495	Ensembl104_promoter_flanking_region:ENSR00000368008	576	576	1494	1	0.385542
NC_000001.11	108533624	108534200	RefSeqFE_transcriptional_cis_regulatory_region_GeneID:115801437	NC_000001.11	108533445	108533791	ENCODEcCRE_EH38E1374130_distal_enhancer	167	576	346	0.289931	0.482659
NC_000001.11	108533624	108534200	RefSeqFE_transcriptional_cis_regulatory_region_GeneID:115801437	NC_000001.11	108533844	108534190	ENCODEcCRE_EH38E1374131_distal_enhancer	346	576	346	0.600694	1
NC_000001.11	109253073	109256228	RefSeqFE_enhancer_GeneID:110121283	NC_000001.11	109253073	109256228	VISTA_enhancer_positive_hs2216	3155	3155	3155	1	1
NC_000001.11	109253073	109256228	RefSeqFE_enhancer_GeneID:110121283	NC_000001.11	109253544	109253776	ENCODEcCRE_EH38E1374619_distal_enhancer	232	3155	232	0.0735341	1
NC_000001.11	109253073	109256228	RefSeqFE_enhancer_GeneID:110121283	NC_000001.11	109253839	109254057	ENCODEcCRE_EH38E1374620_distal_enhancer	218	3155	218	0.0690967	1
NC_000001.11	109253073	109256228	RefSeqFE_enhancer_GeneID:110121283	NC_000001.11	109254281	109254540	ENCODEcCRE_EH38E1374621_distal_enhancer	259	3155	259	0.0820919	1
NC_000001.11	109253073	109256228	RefSeqFE_enhancer_GeneID:110121283	NC_000001.11	109254379	109255013	FANTOM5_enhancer_chr1:109254379-109255013	634	3155	634	0.200951	1
NC_000001.11	109253073	109256228	RefSeqFE_enhancer_GeneID:110121283	NC_000001.11	109254592	109254836	ENCODEcCRE_EH38E1374622_distal_enhancer	244	3155	244	0.0773376	1
NC_000001.11	109253073	109256228	RefSeqFE_enhancer_GeneID:110121283	NC_000001.11	109254800	109255000	Ensembl104_CTCF_binding_site:ENSR00000928814	200	3155	200	0.0633914	1
NC_000001.11	109253073	109256228	RefSeqFE_enhancer_GeneID:110121283	NC_000001.11	109255081	109255382	ENCODEcCRE_EH38E1374623_distal_enhancer	301	3155	301	0.0954041	1
NC_000001.11	109253073	109256228	RefSeqFE_enhancer_GeneID:110121283	NC_000001.11	109255200	109255600	Ensembl104_CTCF_binding_site:ENSR00000368161	400	3155	400	0.126783	1
NC_000001.11	109253073	109256228	RefSeqFE_enhancer_GeneID:110121283	NC_000001.11	109255388	109255693	ENCODEcCRE_EH38E1374624_distal_enhancer	305	3155	305	0.0966719	1
NC_000001.11	109253073	109256228	RefSeqFE_enhancer_GeneID:110121283	NC_000001.11	109255726	109256033	ENCODEcCRE_EH38E1374625_distal_enhancer	307	3155	307	0.0973059	1
NC_000001.11	109253073	109256228	RefSeqFE_enhancer_GeneID:110121283	NC_000001.11	109196948	109276536	dbSUPER_HMEC_SE_36073	3155	3155	79588	1	0.0396417
NC_000001.11	109253073	109256228	RefSeqFE_enhancer_GeneID:110121283	NC_000001.11	109237165	109256555	dbSUPER_MCF-7_SE_43475	3155	3155	19390	1	0.162713
NC_000001.11	109253073	109256228	RefSeqFE_enhancer_GeneID:110121283	NC_000001.11	109238832	109278960	dbSUPER_Esophagus_SE_26927	3155	3155	40128	1	0.0786234
NC_000001.11	109253073	109256228	RefSeqFE_enhancer_GeneID:110121283	NC_000001.11	109240202	109280878	dbSUPER_Brain_Mid_Frontal_Lobe_SE_08846	3155	3155	40676	1	0.0775642
NC_000001.11	109253073	109256228	RefSeqFE_enhancer_GeneID:110121283	NC_000001.11	109247729	109279142	dbSUPER_Brain_Hippocampus_Middle_SE_05978	3155	3155	31413	1	0.100436
NC_000001.11	109274251	109276283	RefSeqFE_enhancer_GeneID:110121285	NC_000001.11	109274251	109276283	VISTA_enhancer_positive_hs2263	2032	2032	2032	1	1
NC_000001.11	109274251	109276283	RefSeqFE_enhancer_GeneID:110121285	NC_000001.11	109274511	109274699	ENCODEcCRE_EH38E1374645_distal_enhancer	188	2032	188	0.0925197	1
NC_000001.11	109274251	109276283	RefSeqFE_enhancer_GeneID:110121285	NC_000001.11	109274793	109275142	ENCODEcCRE_EH38E1374646_distal_enhancer	349	2032	349	0.171752	1
NC_000001.11	109274251	109276283	RefSeqFE_enhancer_GeneID:110121285	NC_000001.11	109275271	109275524	ENCODEcCRE_EH38E1374647_distal_enhancer	253	2032	253	0.124508	1
NC_000001.11	109274251	109276283	RefSeqFE_enhancer_GeneID:110121285	NC_000001.11	109275901	109276246	ENCODEcCRE_EH38E1374648_distal_enhancer	345	2032	345	0.169783	1
NC_000001.11	109274251	109276283	RefSeqFE_enhancer_GeneID:110121285	NC_000001.11	109196948	109276536	dbSUPER_HMEC_SE_36073	2032	2032	79588	1	0.0255315
NC_000001.11	109274251	109276283	RefSeqFE_enhancer_GeneID:110121285	NC_000001.11	109238832	109278960	dbSUPER_Esophagus_SE_26927	2032	2032	40128	1	0.050638
NC_000001.11	109274251	109276283	RefSeqFE_enhancer_GeneID:110121285	NC_000001.11	109240202	109280878	dbSUPER_Brain_Mid_Frontal_Lobe_SE_08846	2032	2032	40676	1	0.0499557
NC_000001.11	109274251	109276283	RefSeqFE_enhancer_GeneID:110121285	NC_000001.11	109247729	109279142	dbSUPER_Brain_Hippocampus_Middle_SE_05978	2032	2032	31413	1	0.0646866
NC_000001.11	109274251	109276283	RefSeqFE_enhancer_GeneID:110121285	NC_000001.11	109273574	109284402	dbSUPER_Brain_Inferior_Temporal_Lobe_SE_08667	2032	2032	10828	1	0.187662
NC_000001.11	109277466	109277761	RefSeqFE_enhancer_GeneID:112577471	NC_000001.11	109276800	109278600	Ensembl104_CTCF_binding_site:ENSR00000368167	295	295	1800	1	0.163889
NC_000001.11	109277466	109277761	RefSeqFE_enhancer_GeneID:112577471	NC_000001.11	109277458	109277796	ENCODEcCRE_EH38E1374650_distal_enhancer	295	295	338	1	0.872781
NC_000001.11	109277466	109277761	RefSeqFE_enhancer_GeneID:112577471	NC_000001.11	109238832	109278960	dbSUPER_Esophagus_SE_26927	295	295	40128	1	0.00735148
NC_000001.11	109277466	109277761	RefSeqFE_enhancer_GeneID:112577471	NC_000001.11	109240202	109280878	dbSUPER_Brain_Mid_Frontal_Lobe_SE_08846	295	295	40676	1	0.00725243
NC_000001.11	109277466	109277761	RefSeqFE_enhancer_GeneID:112577471	NC_000001.11	109247729	109279142	dbSUPER_Brain_Hippocampus_Middle_SE_05978	295	295	31413	1	0.00939102
NC_000001.11	109277466	109277761	RefSeqFE_enhancer_GeneID:112577471	NC_000001.11	109273574	109284402	dbSUPER_Brain_Inferior_Temporal_Lobe_SE_08667	295	295	10828	1	0.0272442
NC_000001.11	109772106	109772401	RefSeqFE_enhancer_GeneID:112577473	NC_000001.11	109771800	109772600	Ensembl104_enhancer:ENSR00000928897	295	295	800	1	0.36875
NC_000001.11	109772106	109772401	RefSeqFE_enhancer_GeneID:112577473	NC_000001.11	109772099	109772442	ENCODEcCRE_EH38E1375090_distal_enhancer	295	295	343	1	0.860058
NC_000001.11	109772106	109772401	RefSeqFE_enhancer_GeneID:112577473	NC_000001.11	109772400	109772600	Ensembl104_CTCF_binding_site:ENSR00000368299	1	295	200	0.00338983	0.005
NC_000001.11	109772106	109772401	RefSeqFE_enhancer_GeneID:112577473	NC_000001.11	109760499	109798254	dbSUPER_Colon_Crypt_1_SE_23201	295	295	37755	1	0.00781353
NC_000001.11	109772106	109772401	RefSeqFE_enhancer_GeneID:112577473	NC_000001.11	109760561	109802935	dbSUPER_Colon_Crypt_2_SE_23812	295	295	42374	1	0.00696182
NC_000001.11	109772106	109772401	RefSeqFE_enhancer_GeneID:112577473	NC_000001.11	109760849	109804069	dbSUPER_Small_Intestine_SE_52808	295	295	43220	1	0.00682554
NC_000001.11	109772106	109772401	RefSeqFE_enhancer_GeneID:112577473	NC_000001.11	109761140	109825024	dbSUPER_Sigmoid_Colon_SE_50503	295	295	63884	1	0.00461774
NC_000001.11	109772106	109772401	RefSeqFE_enhancer_GeneID:112577473	NC_000001.11	109769599	109825107	dbSUPER_Brain_Hippocampus_Middle_SE_06569	295	295	55508	1	0.00531455
NC_000001.11	109889136	109889561	RefSeqFE_transcriptional_cis_regulatory_region_GeneID:115801438	NC_000001.11	109863733	109908128	dbSUPER_Toledo_SE_62091	425	425	44395	1	0.00957315
NC_000001.11	109889136	109889561	RefSeqFE_transcriptional_cis_regulatory_region_GeneID:115801438	NC_000001.11	109863836	109934529	dbSUPER_Spleen_SE_53713	425	425	70693	1	0.00601191
NC_000001.11	109889136	109889561	RefSeqFE_transcriptional_cis_regulatory_region_GeneID:115801438	NC_000001.11	109864381	109934548	dbSUPER_Adipose_Nuclei_SE_00603	425	425	70167	1	0.00605698
NC_000001.11	109889136	109889561	RefSeqFE_transcriptional_cis_regulatory_region_GeneID:115801438	NC_000001.11	109864413	109930231	dbSUPER_Brain_Anterior_Caudate_SE_04393	425	425	65818	1	0.0064572
NC_000001.11	109889136	109889561	RefSeqFE_transcriptional_cis_regulatory_region_GeneID:115801438	NC_000001.11	109871930	109932233	dbSUPER_Brain_Hippocampus_Middle_SE_06043	425	425	60303	1	0.00704774
NC_000001.11	110341286	110341581	RefSeqFE_enhancer_GeneID:112577475	NC_000001.11	110335689	110341310	dbSUPER_HeLa_SE_35310	24	295	5621	0.0813559	0.0042697
NC_000001.11	110341286	110341581	RefSeqFE_enhancer_GeneID:112577475	NC_000001.11	110336737	110343639	dbSUPER_CD8_Memory_7pool_SE_21210	295	295	6902	1	0.0427412
NC_000001.11	110341286	110341581	RefSeqFE_enhancer_GeneID:112577475	NC_000001.11	110336999	110345001	Ensembl104_promoter:ENSR00000011260	295	295	8002	1	0.0368658
NC_000001.11	110341286	110341581	RefSeqFE_enhancer_GeneID:112577475	NC_000001.11	110337225	110342543	dbSUPER_K562_SE_40069	295	295	5318	1	0.055472
NC_000001.11	110341286	110341581	RefSeqFE_enhancer_GeneID:112577475	NC_000001.11	110341315	110341582	ENCODEcCRE_EH38E1375667_proximal_enhancer	266	295	267	0.901695	0.996255
NC_000001.11	110341286	110341581	RefSeqFE_enhancer_GeneID:112577475	NC_000001.11	110336175	110349548	dbSUPER_CD4_Memory_Primary_7pool_SE_14984	295	295	13373	1	0.0220594
NC_000001.11	110341286	110341581	RefSeqFE_enhancer_GeneID:112577475	NC_000001.11	110336638	110357260	dbSUPER_CD34_Primary_RO01536_SE_13756	295	295	20622	1	0.0143051
NC_000001.11	110341286	110341581	RefSeqFE_enhancer_GeneID:112577475	NC_000001.11	110337024	110384956	dbSUPER_CD14_SE_10013	295	295	47932	1	0.00615455
NC_000001.11	111619526	111619821	RefSeqFE_enhancer_GeneID:112577476	NC_000001.11	111618799	111623001	Ensembl104_promoter:ENSR00000011398	295	295	4202	1	0.0702047
NC_000001.11	111619526	111619821	RefSeqFE_enhancer_GeneID:112577476	NC_000001.11	111619403	111619558	ENCODEcCRE_EH38E1376500_proximal_enhancer	32	295	155	0.108475	0.206452
NC_000001.11	111619526	111619821	RefSeqFE_enhancer_GeneID:112577476	NC_000001.11	111619595	111619944	ENCODEcCRE_EH38E1376501_promoter	226	295	349	0.766102	0.647564
NC_000001.11	111619526	111619821	RefSeqFE_enhancer_GeneID:112577476	NC_000001.11	111587196	111670325	dbSUPER_CD4p_CD25-_Il17-_PMAstim_Th_SE_18422	295	295	83129	1	0.0035487
NC_000001.11	111619526	111619821	RefSeqFE_enhancer_GeneID:112577476	NC_000001.11	111587521	111631155	dbSUPER_Ly3_SE_58908	295	295	43634	1	0.00676078
NC_000001.11	111619526	111619821	RefSeqFE_enhancer_GeneID:112577476	NC_000001.11	111587570	111634377	dbSUPER_Tonsil_SE_62455	295	295	46807	1	0.00630248
NC_000001.11	111619526	111619821	RefSeqFE_enhancer_GeneID:112577476	NC_000001.11	111591607	111623172	dbSUPER_Duodenum_Smooth_Muscle_SE_26437	295	295	31565	1	0.00934579
NC_000001.11	111619526	111619821	RefSeqFE_enhancer_GeneID:112577476	NC_000001.11	111591693	111629613	dbSUPER_Stomach_Smooth_Muscle_SE_54875	295	295	37920	1	0.00777954
NC_000001.11	111619526	111619821	RefSeqFE_enhancer_GeneID:112577476	NC_000001.11	111591713	111646005	dbSUPER_CD8_primary_SE_22945	295	295	54292	1	0.00543358
NC_000001.11	111619526	111619821	RefSeqFE_enhancer_GeneID:112577476	NC_000001.11	111591885	111632526	dbSUPER_CD4p_CD25-_Il17p_PMAstim_Th17_SE_19860	295	295	40641	1	0.00725868
NC_000001.11	111619526	111619821	RefSeqFE_enhancer_GeneID:112577476	NC_000001.11	111591922	111630246	dbSUPER_GM12878_SE_32554	295	295	38324	1	0.00769753
NC_000001.11	111619526	111619821	RefSeqFE_enhancer_GeneID:112577476	NC_000001.11	111592040	111640162	dbSUPER_Ly4_SE_59762	295	295	48122	1	0.00613025
NC_000001.11	111619526	111619821	RefSeqFE_enhancer_GeneID:112577476	NC_000001.11	111592233	111629054	dbSUPER_CD3_SE_12350	295	295	36821	1	0.00801173
NC_000001.11	111619526	111619821	RefSeqFE_enhancer_GeneID:112577476	NC_000001.11	111587457	111675127	dbSUPER_CD20_SE_11566	295	295	87670	1	0.00336489
NC_000001.11	112698986	112699281	RefSeqFE_enhancer_GeneID:112577477	NC_000001.11	112698942	112699288	ENCODEcCRE_EH38E1377163_distal_enhancer	295	295	346	1	0.852601
NC_000001.11	112698986	112699281	RefSeqFE_enhancer_GeneID:112577477	NC_000001.11	112678354	112708137	dbSUPER_Spleen_SE_54019	295	295	29783	1	0.00990498
NC_000001.11	112698986	112699281	RefSeqFE_enhancer_GeneID:112577477	NC_000001.11	112687318	112713778	dbSUPER_LNCaP_SE_41824	295	295	26460	1	0.0111489
NC_000001.11	112698986	112699281	RefSeqFE_enhancer_GeneID:112577477	NC_000001.11	112687399	112707828	dbSUPER_Fetal_Muscle_SE_30059	295	295	20429	1	0.0144403
NC_000001.11	112698986	112699281	RefSeqFE_enhancer_GeneID:112577477	NC_000001.11	112687788	112708222	dbSUPER_Right_Atrium_SE_49125	295	295	20434	1	0.0144367
NC_000001.11	112698986	112699281	RefSeqFE_enhancer_GeneID:112577477	NC_000001.11	112697200	112707850	dbSUPER_Fetal_Intestine_Large_SE_28932	295	295	10650	1	0.0276995
NC_000001.11	112698986	112699281	RefSeqFE_enhancer_GeneID:112577477	NC_000001.11	112697363	112707731	dbSUPER_Fetal_Intestine_SE_27958	295	295	10368	1	0.0284529
NC_000001.11	112698986	112699281	RefSeqFE_enhancer_GeneID:112577477	NC_000001.11	112697664	112708107	dbSUPER_Small_Intestine_SE_52862	295	295	10443	1	0.0282486
NC_000001.11	112698986	112699281	RefSeqFE_enhancer_GeneID:112577477	NC_000001.11	112697699	112708187	dbSUPER_Lung_SE_42899	295	295	10488	1	0.0281274
NC_000001.11	112698986	112699281	RefSeqFE_enhancer_GeneID:112577477	NC_000001.11	112697715	112708196	dbSUPER_Left_Ventricle_SE_41201	295	295	10481	1	0.0281462
NC_000001.11	112698986	112699281	RefSeqFE_enhancer_GeneID:112577477	NC_000001.11	112697749	112707768	dbSUPER_K562_SE_40003	295	295	10019	1	0.0294441
NC_000001.11	112698986	112699281	RefSeqFE_enhancer_GeneID:112577477	NC_000001.11	112697779	112708218	dbSUPER_Sigmoid_Colon_SE_50621	295	295	10439	1	0.0282594
NC_000001.11	112698986	112699281	RefSeqFE_enhancer_GeneID:112577477	NC_000001.11	112697793	112706417	dbSUPER_VACO_400_SE_57334	295	295	8624	1	0.0342069
NC_000001.11	112698986	112699281	RefSeqFE_enhancer_GeneID:112577477	NC_000001.11	112698107	112707625	dbSUPER_Adrenal_Gland_SE_01378	295	295	9518	1	0.0309939
NC_000001.11	112698986	112699281	RefSeqFE_enhancer_GeneID:112577477	NC_000001.11	112698292	112706450	dbSUPER_Ovary_SE_46910	295	295	8158	1	0.0361608
NC_000001.11	112904066	112904361	RefSeqFE_enhancer_GeneID:112577478	NC_000001.11	112903200	112907200	Ensembl104_promoter_flanking_region:ENSR00000369085	295	295	4000	1	0.07375
NC_000001.11	112904066	112904361	RefSeqFE_enhancer_GeneID:112577478	NC_000001.11	112904067	112904417	ENCODEcCRE_EH38E1377340_distal_enhancer	294	295	350	0.99661	0.84
NC_000001.11	112997433	112999398	RefSeqFE_enhancer_GeneID:110121184	NC_000001.11	112994237	112999800	Ensembl104_promoter_flanking_region:ENSR00000369098	1965	1965	5563	1	0.353227
NC_000001.11	112997433	112999398	RefSeqFE_enhancer_GeneID:110121184	NC_000001.11	112997433	112999398	VISTA_enhancer_positive_hs1672	1965	1965	1965	1	1
NC_000001.11	112997433	112999398	RefSeqFE_enhancer_GeneID:110121184	NC_000001.11	112997855	112998163	ENCODEcCRE_EH38E1377418_distal_enhancer	308	1965	308	0.156743	1
NC_000001.11	112997433	112999398	RefSeqFE_enhancer_GeneID:110121184	NC_000001.11	112998900	112999248	ENCODEcCRE_EH38E1377420_distal_enhancer	348	1965	348	0.177099	1
NC_000001.11	112997433	112999398	RefSeqFE_enhancer_GeneID:110121184	NC_000001.11	112999000	112999200	Ensembl104_CTCF_binding_site:ENSR00000369099	200	1965	200	0.101781	1
NC_000001.11	113027586	113027881	RefSeqFE_silencer_GeneID:113939977	NC_000001.11	113026401	113028999	Ensembl104_promoter_flanking_region:ENSR00000369106	295	295	2598	1	0.113549
NC_000001.11	113027586	113027881	RefSeqFE_silencer_GeneID:113939977	NC_000001.11	113027559	113027900	ENCODEcCRE_EH38E1377432_distal_enhancer	295	295	341	1	0.865103
NC_000001.11	113140525	113141426	RefSeqFE_transcriptional_cis_regulatory_region_GeneID:115801439	NC_000001.11	113140000	113141200	Ensembl104_CTCF_binding_site:ENSR00000253634	675	901	1200	0.749168	0.5625
NC_000001.11	113140525	113141426	RefSeqFE_transcriptional_cis_regulatory_region_GeneID:115801439	NC_000001.11	113140540	113140883	ENCODEcCRE_EH38E1377509_distal_enhancer	343	901	343	0.380688	1
NC_000001.11	113140525	113141426	RefSeqFE_transcriptional_cis_regulatory_region_GeneID:115801439	NC_000001.11	113141038	113141368	ENCODEcCRE_EH38E1377510_distal_enhancer	330	901	330	0.36626	1
NC_000001.11	113914325	113914470	RefSeqFE_enhancer_GeneID:111413047	NC_000001.11	113912200	113916199	Ensembl104_promoter_flanking_region:ENSR00000369287	145	145	3999	1	0.0362591
NC_000001.11	113914325	113914470	RefSeqFE_enhancer_GeneID:111413047	NC_000001.11	113914260	113914610	ENCODEcCRE_EH38E1377923_CTCF-only	145	145	350	1	0.414286
NC_000001.11	113914389	113914407	RefSeqFE_transcriptional_cis_regulatory_region_GeneID:111413047	NC_000001.11	113912200	113916199	Ensembl104_promoter_flanking_region:ENSR00000369287	18	18	3999	1	0.00450113
NC_000001.11	113914389	113914407	RefSeqFE_transcriptional_cis_regulatory_region_GeneID:111413047	NC_000001.11	113914260	113914610	ENCODEcCRE_EH38E1377923_CTCF-only	18	18	350	1	0.0514286
NC_000001.11	114458306	114458601	RefSeqFE_enhancer_GeneID:112577479	NC_000001.11	114458273	114458623	ENCODEcCRE_EH38E1378260_proximal_enhancer	295	295	350	1	0.842857
NC_000001.11	114458306	114458601	RefSeqFE_enhancer_GeneID:112577479	NC_000001.11	114452474	114468822	dbSUPER_HepG2_SE_35743	295	295	16348	1	0.018045
NC_000001.11	114458306	114458601	RefSeqFE_enhancer_GeneID:112577479	NC_000001.11	114454401	114460599	Ensembl104_promoter_flanking_region:ENSR00000011690	295	295	6198	1	0.047596
NC_000001.11	114458306	114458601	RefSeqFE_enhancer_GeneID:112577479	NC_000001.11	114458245	114458627	FANTOM5_enhancer_chr1:114458245-114458627	295	295	382	1	0.772251
NC_000001.11	115595867	115596162	RefSeqFE_enhancer_GeneID:112577480	NC_000001.11	115594001	115596599	Ensembl104_promoter_flanking_region:ENSR00000929540	295	295	2598	1	0.113549
NC_000001.11	115595867	115596162	RefSeqFE_enhancer_GeneID:112577480	NC_000001.11	115594400	115596800	Ensembl104_CTCF_binding_site:ENSR00000253738	295	295	2400	1	0.122917
NC_000001.11	115595867	115596162	RefSeqFE_enhancer_GeneID:112577480	NC_000001.11	115595755	115596102	ENCODEcCRE_EH38E1378895_distal_enhancer	235	295	347	0.79661	0.677233
NC_000001.11	116418446	116418741	RefSeqFE_enhancer_GeneID:112577481	NC_000001.11	116417399	116419601	Ensembl104_promoter:ENSR00000011918	295	295	2202	1	0.133969
NC_000001.11	116418446	116418741	RefSeqFE_enhancer_GeneID:112577481	NC_000001.11	116418307	116418469	ENCODEcCRE_EH38E1379528_promoter	23	295	162	0.0779661	0.141975
NC_000001.11	116418446	116418741	RefSeqFE_enhancer_GeneID:112577481	NC_000001.11	116418483	116418833	ENCODEcCRE_EH38E1379529_promoter	258	295	350	0.874576	0.737143
NC_000001.11	116418446	116418741	RefSeqFE_enhancer_GeneID:112577481	NC_000001.11	116397691	116434500	dbSUPER_Left_Ventricle_SE_41497	295	295	36809	1	0.00801434
NC_000001.11	116418446	116418741	RefSeqFE_enhancer_GeneID:112577481	NC_000001.11	116367101	116435106	dbSUPER_Brain_Inferior_Temporal_Lobe_SE_07963	295	295	68005	1	0.00433792
NC_000001.11	116418446	116418741	RefSeqFE_enhancer_GeneID:112577481	NC_000001.11	116371355	116435179	dbSUPER_Brain_Cingulate_Gyrus_SE_05197	295	295	63824	1	0.00462209
NC_000001.11	116418446	116418741	RefSeqFE_enhancer_GeneID:112577481	NC_000001.11	116372073	116434516	dbSUPER_Lung_SE_42435	295	295	62443	1	0.00472431
NC_000001.11	116475259	116475404	RefSeqFE_enhancer_GeneID:111365211	NC_000001.11	116475195	116475530	ENCODEcCRE_EH38E1379588_distal_enhancer	145	145	335	1	0.432836
NC_000001.11	116475259	116475404	RefSeqFE_enhancer_GeneID:111365211	NC_000001.11	116475286	116475451	FANTOM5_enhancer_chr1:116475286-116475451	118	145	165	0.813793	0.715152
NC_000001.11	116475259	116475404	RefSeqFE_enhancer_GeneID:111365211	NC_000001.11	116465717	116516078	dbSUPER_Small_Intestine_SE_52493	145	145	50361	1	0.00287921
NC_000001.11	116475259	116475404	RefSeqFE_enhancer_GeneID:111365211	NC_000001.11	116465765	116509718	dbSUPER_VACO_400_SE_57245	145	145	43953	1	0.00329898
NC_000001.11	116475259	116475404	RefSeqFE_enhancer_GeneID:111365211	NC_000001.11	116465936	116496569	dbSUPER_Pancreas_SE_47846	145	145	30633	1	0.00473346
NC_000001.11	116475259	116475404	RefSeqFE_enhancer_GeneID:111365211	NC_000001.11	116470600	116479199	Ensembl104_promoter_flanking_region:ENSR00000369963	145	145	8599	1	0.0168624
NC_000001.11	116475259	116475404	RefSeqFE_enhancer_GeneID:111365211	NC_000001.11	116471244	116516094	dbSUPER_Sigmoid_Colon_SE_50584	145	145	44850	1	0.003233
NC_000001.11	116475259	116475404	RefSeqFE_enhancer_GeneID:111365211	NC_000001.11	116474248	116515948	dbSUPER_Left_Ventricle_SE_41250	145	145	41700	1	0.00347722
NC_000001.11	116475259	116475404	RefSeqFE_enhancer_GeneID:111365211	NC_000001.11	116460664	116540096	dbSUPER_Fetal_Intestine_Large_SE_28774	145	145	79432	1	0.00182546
NC_000001.11	116475259	116475404	RefSeqFE_enhancer_GeneID:111365211	NC_000001.11	116465138	116539718	dbSUPER_Fetal_Intestine_SE_27848	145	145	74580	1	0.00194422
NC_000001.11	116475324	116475338	RefSeqFE_transcriptional_cis_regulatory_region_GeneID:111365211	NC_000001.11	116475195	116475530	ENCODEcCRE_EH38E1379588_distal_enhancer	14	14	335	1	0.041791
NC_000001.11	116475324	116475338	RefSeqFE_transcriptional_cis_regulatory_region_GeneID:111365211	NC_000001.11	116475286	116475451	FANTOM5_enhancer_chr1:116475286-116475451	14	14	165	1	0.0848485
NC_000001.11	116475324	116475338	RefSeqFE_transcriptional_cis_regulatory_region_GeneID:111365211	NC_000001.11	116465717	116516078	dbSUPER_Small_Intestine_SE_52493	14	14	50361	1	0.000277993
NC_000001.11	116475324	116475338	RefSeqFE_transcriptional_cis_regulatory_region_GeneID:111365211	NC_000001.11	116465765	116509718	dbSUPER_VACO_400_SE_57245	14	14	43953	1	0.000318522
NC_000001.11	116475324	116475338	RefSeqFE_transcriptional_cis_regulatory_region_GeneID:111365211	NC_000001.11	116465936	116496569	dbSUPER_Pancreas_SE_47846	14	14	30633	1	0.000457023
NC_000001.11	116475324	116475338	RefSeqFE_transcriptional_cis_regulatory_region_GeneID:111365211	NC_000001.11	116470600	116479199	Ensembl104_promoter_flanking_region:ENSR00000369963	14	14	8599	1	0.0016281
NC_000001.11	116475324	116475338	RefSeqFE_transcriptional_cis_regulatory_region_GeneID:111365211	NC_000001.11	116471244	116516094	dbSUPER_Sigmoid_Colon_SE_50584	14	14	44850	1	0.000312152
NC_000001.11	116475324	116475338	RefSeqFE_transcriptional_cis_regulatory_region_GeneID:111365211	NC_000001.11	116474248	116515948	dbSUPER_Left_Ventricle_SE_41250	14	14	41700	1	0.000335731
NC_000001.11	116475324	116475338	RefSeqFE_transcriptional_cis_regulatory_region_GeneID:111365211	NC_000001.11	116460664	116540096	dbSUPER_Fetal_Intestine_Large_SE_28774	14	14	79432	1	0.000176251
NC_000001.11	116475324	116475338	RefSeqFE_transcriptional_cis_regulatory_region_GeneID:111365211	NC_000001.11	116465138	116539718	dbSUPER_Fetal_Intestine_SE_27848	14	14	74580	1	0.000187718
NC_000001.11	116503159	116503212	RefSeqFE_transcriptional_cis_regulatory_region_GeneID:115801440	NC_000001.11	116500873	116505114	dbSUPER_CD34_fetal_SE_12796	53	53	4241	1	0.0124971
NC_000001.11	116503159	116503212	RefSeqFE_transcriptional_cis_regulatory_region_GeneID:115801440	NC_000001.11	116502986	116503277	ENCODEcCRE_EH38E1379630_distal_enhancer	53	53	291	1	0.182131
NC_000001.11	116503159	116503212	RefSeqFE_transcriptional_cis_regulatory_region_GeneID:115801440	NC_000001.11	116465717	116516078	dbSUPER_Small_Intestine_SE_52493	53	53	50361	1	0.0010524
NC_000001.11	116503159	116503212	RefSeqFE_transcriptional_cis_regulatory_region_GeneID:115801440	NC_000001.11	116465765	116509718	dbSUPER_VACO_400_SE_57245	53	53	43953	1	0.00120583
NC_000001.11	116503159	116503212	RefSeqFE_transcriptional_cis_regulatory_region_GeneID:115801440	NC_000001.11	116471244	116516094	dbSUPER_Sigmoid_Colon_SE_50584	53	53	44850	1	0.00118172
NC_000001.11	116503159	116503212	RefSeqFE_transcriptional_cis_regulatory_region_GeneID:115801440	NC_000001.11	116474248	116515948	dbSUPER_Left_Ventricle_SE_41250	53	53	41700	1	0.00127098
NC_000001.11	116503159	116503212	RefSeqFE_transcriptional_cis_regulatory_region_GeneID:115801440	NC_000001.11	116495475	116517842	dbSUPER_CD14_SE_09543	53	53	22367	1	0.00236956
NC_000001.11	116503159	116503212	RefSeqFE_transcriptional_cis_regulatory_region_GeneID:115801440	NC_000001.11	116497336	116509854	dbSUPER_K562_SE_39920	53	53	12518	1	0.0042339
NC_000001.11	116503159	116503212	RefSeqFE_transcriptional_cis_regulatory_region_GeneID:115801440	NC_000001.11	116500447	116508665	dbSUPER_CD34_adult_SE_12587	53	53	8218	1	0.00644926
NC_000001.11	116503159	116503212	RefSeqFE_transcriptional_cis_regulatory_region_GeneID:115801440	NC_000001.11	116502322	116517501	dbSUPER_CD56_SE_20393	53	53	15179	1	0.00349167
NC_000001.11	116503159	116503212	RefSeqFE_transcriptional_cis_regulatory_region_GeneID:115801440	NC_000001.11	116460664	116540096	dbSUPER_Fetal_Intestine_Large_SE_28774	53	53	79432	1	0.000667237
NC_000001.11	116503159	116503212	RefSeqFE_transcriptional_cis_regulatory_region_GeneID:115801440	NC_000001.11	116465138	116539718	dbSUPER_Fetal_Intestine_SE_27848	53	53	74580	1	0.000710646
NC_000001.11	116503940	116504922	RefSeqFE_transcriptional_cis_regulatory_region_GeneID:112577483	NC_000001.11	116500873	116505114	dbSUPER_CD34_fetal_SE_12796	982	982	4241	1	0.231549
NC_000001.11	116503940	116504922	RefSeqFE_transcriptional_cis_regulatory_region_GeneID:112577483	NC_000001.11	116503616	116503964	ENCODEcCRE_EH38E1379631_distal_enhancer	24	982	348	0.0244399	0.0689655
NC_000001.11	116503940	116504922	RefSeqFE_transcriptional_cis_regulatory_region_GeneID:112577483	NC_000001.11	116504030	116504358	ENCODEcCRE_EH38E1379632_distal_enhancer	328	982	328	0.334012	1
NC_000001.11	116503940	116504922	RefSeqFE_transcriptional_cis_regulatory_region_GeneID:112577483	NC_000001.11	116504426	116504776	ENCODEcCRE_EH38E1379633_distal_enhancer	350	982	350	0.356415	1
NC_000001.11	116503940	116504922	RefSeqFE_transcriptional_cis_regulatory_region_GeneID:112577483	NC_000001.11	116504431	116504806	FANTOM5_enhancer_chr1:116504431-116504806	375	982	375	0.381874	1
NC_000001.11	116503940	116504922	RefSeqFE_transcriptional_cis_regulatory_region_GeneID:112577483	NC_000001.11	116504599	116504801	Ensembl104_promoter:ENSR00000929653	202	982	202	0.205703	1
NC_000001.11	116503940	116504922	RefSeqFE_transcriptional_cis_regulatory_region_GeneID:112577483	NC_000001.11	116465717	116516078	dbSUPER_Small_Intestine_SE_52493	982	982	50361	1	0.0194992
NC_000001.11	116503940	116504922	RefSeqFE_transcriptional_cis_regulatory_region_GeneID:112577483	NC_000001.11	116465765	116509718	dbSUPER_VACO_400_SE_57245	982	982	43953	1	0.022342
NC_000001.11	116503940	116504922	RefSeqFE_transcriptional_cis_regulatory_region_GeneID:112577483	NC_000001.11	116471244	116516094	dbSUPER_Sigmoid_Colon_SE_50584	982	982	44850	1	0.0218952
NC_000001.11	116503940	116504922	RefSeqFE_transcriptional_cis_regulatory_region_GeneID:112577483	NC_000001.11	116474248	116515948	dbSUPER_Left_Ventricle_SE_41250	982	982	41700	1	0.0235492
NC_000001.11	116503940	116504922	RefSeqFE_transcriptional_cis_regulatory_region_GeneID:112577483	NC_000001.11	116495475	116517842	dbSUPER_CD14_SE_09543	982	982	22367	1	0.043904
NC_000001.11	116503940	116504922	RefSeqFE_transcriptional_cis_regulatory_region_GeneID:112577483	NC_000001.11	116497336	116509854	dbSUPER_K562_SE_39920	982	982	12518	1	0.078447
NC_000001.11	116503940	116504922	RefSeqFE_transcriptional_cis_regulatory_region_GeneID:112577483	NC_000001.11	116500447	116508665	dbSUPER_CD34_adult_SE_12587	982	982	8218	1	0.119494
NC_000001.11	116503940	116504922	RefSeqFE_transcriptional_cis_regulatory_region_GeneID:112577483	NC_000001.11	116502322	116517501	dbSUPER_CD56_SE_20393	982	982	15179	1	0.0646946
NC_000001.11	116503940	116504922	RefSeqFE_transcriptional_cis_regulatory_region_GeneID:112577483	NC_000001.11	116460664	116540096	dbSUPER_Fetal_Intestine_Large_SE_28774	982	982	79432	1	0.0123628
NC_000001.11	116503940	116504922	RefSeqFE_transcriptional_cis_regulatory_region_GeneID:112577483	NC_000001.11	116465138	116539718	dbSUPER_Fetal_Intestine_SE_27848	982	982	74580	1	0.0131671
NC_000001.11	116504426	116504721	RefSeqFE_enhancer_GeneID:112577483	NC_000001.11	116500873	116505114	dbSUPER_CD34_fetal_SE_12796	295	295	4241	1	0.0695591
NC_000001.11	116504426	116504721	RefSeqFE_enhancer_GeneID:112577483	NC_000001.11	116504426	116504776	ENCODEcCRE_EH38E1379633_distal_enhancer	295	295	350	1	0.842857
NC_000001.11	116504426	116504721	RefSeqFE_enhancer_GeneID:112577483	NC_000001.11	116504431	116504806	FANTOM5_enhancer_chr1:116504431-116504806	290	295	375	0.983051	0.773333
NC_000001.11	116504426	116504721	RefSeqFE_enhancer_GeneID:112577483	NC_000001.11	116504599	116504801	Ensembl104_promoter:ENSR00000929653	122	295	202	0.413559	0.60396
NC_000001.11	116504426	116504721	RefSeqFE_enhancer_GeneID:112577483	NC_000001.11	116465717	116516078	dbSUPER_Small_Intestine_SE_52493	295	295	50361	1	0.00585771
NC_000001.11	116504426	116504721	RefSeqFE_enhancer_GeneID:112577483	NC_000001.11	116465765	116509718	dbSUPER_VACO_400_SE_57245	295	295	43953	1	0.00671171
NC_000001.11	116504426	116504721	RefSeqFE_enhancer_GeneID:112577483	NC_000001.11	116471244	116516094	dbSUPER_Sigmoid_Colon_SE_50584	295	295	44850	1	0.00657748
NC_000001.11	116504426	116504721	RefSeqFE_enhancer_GeneID:112577483	NC_000001.11	116474248	116515948	dbSUPER_Left_Ventricle_SE_41250	295	295	41700	1	0.00707434
NC_000001.11	116504426	116504721	RefSeqFE_enhancer_GeneID:112577483	NC_000001.11	116495475	116517842	dbSUPER_CD14_SE_09543	295	295	22367	1	0.0131891
NC_000001.11	116504426	116504721	RefSeqFE_enhancer_GeneID:112577483	NC_000001.11	116497336	116509854	dbSUPER_K562_SE_39920	295	295	12518	1	0.0235661
NC_000001.11	116504426	116504721	RefSeqFE_enhancer_GeneID:112577483	NC_000001.11	116500447	116508665	dbSUPER_CD34_adult_SE_12587	295	295	8218	1	0.0358968
NC_000001.11	116504426	116504721	RefSeqFE_enhancer_GeneID:112577483	NC_000001.11	116502322	116517501	dbSUPER_CD56_SE_20393	295	295	15179	1	0.0194347
NC_000001.11	116504426	116504721	RefSeqFE_enhancer_GeneID:112577483	NC_000001.11	116460664	116540096	dbSUPER_Fetal_Intestine_Large_SE_28774	295	295	79432	1	0.00371387
NC_000001.11	116504426	116504721	RefSeqFE_enhancer_GeneID:112577483	NC_000001.11	116465138	116539718	dbSUPER_Fetal_Intestine_SE_27848	295	295	74580	1	0.00395548
NC_000001.11	116687161	116688033	RefSeqFE_transcriptional_cis_regulatory_region_GeneID:115801441	NC_000001.11	116687280	116687629	ENCODEcCRE_EH38E1379832_distal_enhancer	349	872	349	0.400229	1
NC_000001.11	116687161	116688033	RefSeqFE_transcriptional_cis_regulatory_region_GeneID:115801441	NC_000001.11	116687640	116687981	ENCODEcCRE_EH38E1379833_distal_enhancer	341	872	341	0.391055	1
NC_000001.11	116687161	116688033	RefSeqFE_transcriptional_cis_regulatory_region_GeneID:115801441	NC_000001.11	116678773	116697449	dbSUPER_K562_SE_40119	872	872	18676	1	0.0466909
NC_000001.11	116687161	116688033	RefSeqFE_transcriptional_cis_regulatory_region_GeneID:115801441	NC_000001.11	116686001	116688999	Ensembl104_promoter_flanking_region:ENSR00000370020	872	872	2998	1	0.290861
NC_000001.11	116751949	116754547	RefSeqFE_promoter_GeneID:107161156	NC_000001.11	116752999	116761001	Ensembl104_promoter:ENSR00000370043	1548	2598	8002	0.595843	0.193452
NC_000001.11	116751949	116754547	RefSeqFE_promoter_GeneID:107161156	NC_000001.11	116753363	116753713	ENCODEcCRE_EH38E1379883_proximal_enhancer	350	2598	350	0.134719	1
NC_000001.11	116751949	116754547	RefSeqFE_promoter_GeneID:107161156	NC_000001.11	116754227	116754571	ENCODEcCRE_EH38E1379884_promoter	320	2598	344	0.123172	0.930233
NC_000001.11	116751949	116754547	RefSeqFE_promoter_GeneID:107161156	NC_000001.11	116735820	116778689	dbSUPER_CD4p_CD25-_Il17p_PMAstim_Th17_SE_19106	2598	2598	42869	1	0.0606032
NC_000001.11	116751949	116754547	RefSeqFE_promoter_GeneID:107161156	NC_000001.11	116736066	116778921	dbSUPER_CD4p_CD25-_Il17-_PMAstim_Th_SE_18252	2598	2598	42855	1	0.060623
NC_000001.11	116751949	116754547	RefSeqFE_promoter_GeneID:107161156	NC_000001.11	116736075	116773472	dbSUPER_CD4p_CD25-_CD45ROp_Memory_SE_17793	2598	2598	37397	1	0.0694708
NC_000001.11	116751949	116754547	RefSeqFE_promoter_GeneID:107161156	NC_000001.11	116736432	116772945	dbSUPER_Tonsil_SE_62556	2598	2598	36513	1	0.0711527
NC_000001.11	116751949	116754547	RefSeqFE_promoter_GeneID:107161156	NC_000001.11	116736631	116773224	dbSUPER_CD4p_CD25-_CD45RAp_Naive_SE_17395	2598	2598	36593	1	0.0709972
NC_000001.11	116751949	116754547	RefSeqFE_promoter_GeneID:107161156	NC_000001.11	116736644	116778951	dbSUPER_DND41_SE_25538	2598	2598	42307	1	0.0614083
NC_000001.11	116751949	116754547	RefSeqFE_promoter_GeneID:107161156	NC_000001.11	116736674	116779116	dbSUPER_Fetal_Thymus_SE_31052	2598	2598	42442	1	0.0612129
NC_000001.11	116751949	116754547	RefSeqFE_promoter_GeneID:107161156	NC_000001.11	116736677	116778545	dbSUPER_Thymus_SE_55133	2598	2598	41868	1	0.0620522
NC_000001.11	116751949	116754547	RefSeqFE_promoter_GeneID:107161156	NC_000001.11	116736727	116771428	dbSUPER_CD4_Memory_Primary_7pool_SE_14506	2598	2598	34701	1	0.0748682
NC_000001.11	116751949	116754547	RefSeqFE_promoter_GeneID:107161156	NC_000001.11	116736738	116771188	dbSUPER_CD4p_CD225int_CD127p_Tmem_SE_16899	2598	2598	34450	1	0.0754136
NC_000001.11	116751949	116754547	RefSeqFE_promoter_GeneID:107161156	NC_000001.11	116736769	116773329	dbSUPER_CD8_primary_SE_22480	2598	2598	36560	1	0.0710613
NC_000001.11	116751949	116754547	RefSeqFE_promoter_GeneID:107161156	NC_000001.11	116736823	116771227	dbSUPER_CD8_Naive_8pool_SE_22104	2598	2598	34404	1	0.0755145
NC_000001.11	116751949	116754547	RefSeqFE_promoter_GeneID:107161156	NC_000001.11	116736982	116771802	dbSUPER_CD3_SE_11896	2598	2598	34820	1	0.0746123
NC_000001.11	116751949	116754547	RefSeqFE_promoter_GeneID:107161156	NC_000001.11	116736989	116771473	dbSUPER_CD4_Naive_Primary_8pool_SE_16368	2598	2598	34484	1	0.0753393
NC_000001.11	116751949	116754547	RefSeqFE_promoter_GeneID:107161156	NC_000001.11	116738024	116778714	dbSUPER_RPMI-8402_SE_49995	2598	2598	40690	1	0.0638486
NC_000001.11	116751949	116754547	RefSeqFE_promoter_GeneID:107161156	NC_000001.11	116752817	116771346	dbSUPER_CD4_Memory_Primary_8pool_SE_15527	1730	2598	18529	0.665897	0.0933672
NC_000001.11	116751949	116754547	RefSeqFE_promoter_GeneID:107161156	NC_000001.11	116752894	116770778	dbSUPER_CD8_Naive_7pool_SE_21752	1653	2598	17884	0.636259	0.092429
NC_000001.11	116751949	116754547	RefSeqFE_promoter_GeneID:107161156	NC_000001.11	116753055	116771342	dbSUPER_CD8_Memory_7pool_SE_20962	1492	2598	18287	0.574288	0.081588
NC_000001.11	116751949	116754547	RefSeqFE_promoter_GeneID:107161156	NC_000001.11	116753140	116769725	dbSUPER_CD4_Naive_Primary_7pool_SE_16134	1407	2598	16585	0.54157	0.0848357
NC_000001.11	116751949	116754547	RefSeqFE_promoter_GeneID:107161156	NC_000001.11	116736790	116817218	dbSUPER_CD56_SE_20301	2598	2598	80428	1	0.0323022
NC_000001.11	116751949	116754547	RefSeqFE_promoter_GeneID:107161156	NC_000001.11	116736849	116785451	dbSUPER_Jurkat_SE_39406	2598	2598	48602	1	0.0534546
NC_000001.11	116752179	116752679	RefSeqFE_transcriptional_cis_regulatory_region_GeneID:107161156	NC_000001.11	116735820	116778689	dbSUPER_CD4p_CD25-_Il17p_PMAstim_Th17_SE_19106	500	500	42869	1	0.0116634
NC_000001.11	116752179	116752679	RefSeqFE_transcriptional_cis_regulatory_region_GeneID:107161156	NC_000001.11	116736066	116778921	dbSUPER_CD4p_CD25-_Il17-_PMAstim_Th_SE_18252	500	500	42855	1	0.0116673
NC_000001.11	116752179	116752679	RefSeqFE_transcriptional_cis_regulatory_region_GeneID:107161156	NC_000001.11	116736075	116773472	dbSUPER_CD4p_CD25-_CD45ROp_Memory_SE_17793	500	500	37397	1	0.0133701
NC_000001.11	116752179	116752679	RefSeqFE_transcriptional_cis_regulatory_region_GeneID:107161156	NC_000001.11	116736432	116772945	dbSUPER_Tonsil_SE_62556	500	500	36513	1	0.0136938
NC_000001.11	116752179	116752679	RefSeqFE_transcriptional_cis_regulatory_region_GeneID:107161156	NC_000001.11	116736631	116773224	dbSUPER_CD4p_CD25-_CD45RAp_Naive_SE_17395	500	500	36593	1	0.0136638
NC_000001.11	116752179	116752679	RefSeqFE_transcriptional_cis_regulatory_region_GeneID:107161156	NC_000001.11	116736644	116778951	dbSUPER_DND41_SE_25538	500	500	42307	1	0.0118184
NC_000001.11	116752179	116752679	RefSeqFE_transcriptional_cis_regulatory_region_GeneID:107161156	NC_000001.11	116736674	116779116	dbSUPER_Fetal_Thymus_SE_31052	500	500	42442	1	0.0117808
NC_000001.11	116752179	116752679	RefSeqFE_transcriptional_cis_regulatory_region_GeneID:107161156	NC_000001.11	116736677	116778545	dbSUPER_Thymus_SE_55133	500	500	41868	1	0.0119423
NC_000001.11	116752179	116752679	RefSeqFE_transcriptional_cis_regulatory_region_GeneID:107161156	NC_000001.11	116736727	116771428	dbSUPER_CD4_Memory_Primary_7pool_SE_14506	500	500	34701	1	0.0144088
NC_000001.11	116752179	116752679	RefSeqFE_transcriptional_cis_regulatory_region_GeneID:107161156	NC_000001.11	116736738	116771188	dbSUPER_CD4p_CD225int_CD127p_Tmem_SE_16899	500	500	34450	1	0.0145138
NC_000001.11	116752179	116752679	RefSeqFE_transcriptional_cis_regulatory_region_GeneID:107161156	NC_000001.11	116736769	116773329	dbSUPER_CD8_primary_SE_22480	500	500	36560	1	0.0136761
NC_000001.11	116752179	116752679	RefSeqFE_transcriptional_cis_regulatory_region_GeneID:107161156	NC_000001.11	116736823	116771227	dbSUPER_CD8_Naive_8pool_SE_22104	500	500	34404	1	0.0145332
NC_000001.11	116752179	116752679	RefSeqFE_transcriptional_cis_regulatory_region_GeneID:107161156	NC_000001.11	116736982	116771802	dbSUPER_CD3_SE_11896	500	500	34820	1	0.0143596
NC_000001.11	116752179	116752679	RefSeqFE_transcriptional_cis_regulatory_region_GeneID:107161156	NC_000001.11	116736989	116771473	dbSUPER_CD4_Naive_Primary_8pool_SE_16368	500	500	34484	1	0.0144995
NC_000001.11	116752179	116752679	RefSeqFE_transcriptional_cis_regulatory_region_GeneID:107161156	NC_000001.11	116738024	116778714	dbSUPER_RPMI-8402_SE_49995	500	500	40690	1	0.012288
NC_000001.11	116752179	116752679	RefSeqFE_transcriptional_cis_regulatory_region_GeneID:107161156	NC_000001.11	116736790	116817218	dbSUPER_CD56_SE_20301	500	500	80428	1	0.00621674
NC_000001.11	116752179	116752679	RefSeqFE_transcriptional_cis_regulatory_region_GeneID:107161156	NC_000001.11	116736849	116785451	dbSUPER_Jurkat_SE_39406	500	500	48602	1	0.0102876
NC_000001.11	116752179	116753183	RefSeqFE_DNAseI_hypersensitive_site_GeneID:107161156	NC_000001.11	116752999	116761001	Ensembl104_promoter:ENSR00000370043	184	1004	8002	0.183267	0.0229943
NC_000001.11	116752179	116753183	RefSeqFE_DNAseI_hypersensitive_site_GeneID:107161156	NC_000001.11	116735820	116778689	dbSUPER_CD4p_CD25-_Il17p_PMAstim_Th17_SE_19106	1004	1004	42869	1	0.0234202
NC_000001.11	116752179	116753183	RefSeqFE_DNAseI_hypersensitive_site_GeneID:107161156	NC_000001.11	116736066	116778921	dbSUPER_CD4p_CD25-_Il17-_PMAstim_Th_SE_18252	1004	1004	42855	1	0.0234278
NC_000001.11	116752179	116753183	RefSeqFE_DNAseI_hypersensitive_site_GeneID:107161156	NC_000001.11	116736075	116773472	dbSUPER_CD4p_CD25-_CD45ROp_Memory_SE_17793	1004	1004	37397	1	0.0268471
NC_000001.11	116752179	116753183	RefSeqFE_DNAseI_hypersensitive_site_GeneID:107161156	NC_000001.11	116736432	116772945	dbSUPER_Tonsil_SE_62556	1004	1004	36513	1	0.0274971
NC_000001.11	116752179	116753183	RefSeqFE_DNAseI_hypersensitive_site_GeneID:107161156	NC_000001.11	116736631	116773224	dbSUPER_CD4p_CD25-_CD45RAp_Naive_SE_17395	1004	1004	36593	1	0.0274369
NC_000001.11	116752179	116753183	RefSeqFE_DNAseI_hypersensitive_site_GeneID:107161156	NC_000001.11	116736644	116778951	dbSUPER_DND41_SE_25538	1004	1004	42307	1	0.0237313
NC_000001.11	116752179	116753183	RefSeqFE_DNAseI_hypersensitive_site_GeneID:107161156	NC_000001.11	116736674	116779116	dbSUPER_Fetal_Thymus_SE_31052	1004	1004	42442	1	0.0236558
NC_000001.11	116752179	116753183	RefSeqFE_DNAseI_hypersensitive_site_GeneID:107161156	NC_000001.11	116736677	116778545	dbSUPER_Thymus_SE_55133	1004	1004	41868	1	0.0239801
NC_000001.11	116752179	116753183	RefSeqFE_DNAseI_hypersensitive_site_GeneID:107161156	NC_000001.11	116736727	116771428	dbSUPER_CD4_Memory_Primary_7pool_SE_14506	1004	1004	34701	1	0.0289329
NC_000001.11	116752179	116753183	RefSeqFE_DNAseI_hypersensitive_site_GeneID:107161156	NC_000001.11	116736738	116771188	dbSUPER_CD4p_CD225int_CD127p_Tmem_SE_16899	1004	1004	34450	1	0.0291437
NC_000001.11	116752179	116753183	RefSeqFE_DNAseI_hypersensitive_site_GeneID:107161156	NC_000001.11	116736769	116773329	dbSUPER_CD8_primary_SE_22480	1004	1004	36560	1	0.0274617
NC_000001.11	116752179	116753183	RefSeqFE_DNAseI_hypersensitive_site_GeneID:107161156	NC_000001.11	116736823	116771227	dbSUPER_CD8_Naive_8pool_SE_22104	1004	1004	34404	1	0.0291827
NC_000001.11	116752179	116753183	RefSeqFE_DNAseI_hypersensitive_site_GeneID:107161156	NC_000001.11	116736982	116771802	dbSUPER_CD3_SE_11896	1004	1004	34820	1	0.028834
NC_000001.11	116752179	116753183	RefSeqFE_DNAseI_hypersensitive_site_GeneID:107161156	NC_000001.11	116736989	116771473	dbSUPER_CD4_Naive_Primary_8pool_SE_16368	1004	1004	34484	1	0.029115
NC_000001.11	116752179	116753183	RefSeqFE_DNAseI_hypersensitive_site_GeneID:107161156	NC_000001.11	116738024	116778714	dbSUPER_RPMI-8402_SE_49995	1004	1004	40690	1	0.0246744
NC_000001.11	116752179	116753183	RefSeqFE_DNAseI_hypersensitive_site_GeneID:107161156	NC_000001.11	116752817	116771346	dbSUPER_CD4_Memory_Primary_8pool_SE_15527	366	1004	18529	0.364542	0.0197528
NC_000001.11	116752179	116753183	RefSeqFE_DNAseI_hypersensitive_site_GeneID:107161156	NC_000001.11	116752894	116770778	dbSUPER_CD8_Naive_7pool_SE_21752	289	1004	17884	0.287849	0.0161597
NC_000001.11	116752179	116753183	RefSeqFE_DNAseI_hypersensitive_site_GeneID:107161156	NC_000001.11	116753055	116771342	dbSUPER_CD8_Memory_7pool_SE_20962	128	1004	18287	0.12749	0.00699951
NC_000001.11	116752179	116753183	RefSeqFE_DNAseI_hypersensitive_site_GeneID:107161156	NC_000001.11	116753140	116769725	dbSUPER_CD4_Naive_Primary_7pool_SE_16134	43	1004	16585	0.0428287	0.0025927
NC_000001.11	116752179	116753183	RefSeqFE_DNAseI_hypersensitive_site_GeneID:107161156	NC_000001.11	116736790	116817218	dbSUPER_CD56_SE_20301	1004	1004	80428	1	0.0124832
NC_000001.11	116752179	116753183	RefSeqFE_DNAseI_hypersensitive_site_GeneID:107161156	NC_000001.11	116736849	116785451	dbSUPER_Jurkat_SE_39406	1004	1004	48602	1	0.0206576
NC_000001.11	116752679	116753183	RefSeqFE_silencer_GeneID:107161156	NC_000001.11	116752999	116761001	Ensembl104_promoter:ENSR00000370043	184	504	8002	0.365079	0.0229943
NC_000001.11	116752679	116753183	RefSeqFE_silencer_GeneID:107161156	NC_000001.11	116735820	116778689	dbSUPER_CD4p_CD25-_Il17p_PMAstim_Th17_SE_19106	504	504	42869	1	0.0117567
NC_000001.11	116752679	116753183	RefSeqFE_silencer_GeneID:107161156	NC_000001.11	116736066	116778921	dbSUPER_CD4p_CD25-_Il17-_PMAstim_Th_SE_18252	504	504	42855	1	0.0117606
NC_000001.11	116752679	116753183	RefSeqFE_silencer_GeneID:107161156	NC_000001.11	116736075	116773472	dbSUPER_CD4p_CD25-_CD45ROp_Memory_SE_17793	504	504	37397	1	0.013477
NC_000001.11	116752679	116753183	RefSeqFE_silencer_GeneID:107161156	NC_000001.11	116736432	116772945	dbSUPER_Tonsil_SE_62556	504	504	36513	1	0.0138033
NC_000001.11	116752679	116753183	RefSeqFE_silencer_GeneID:107161156	NC_000001.11	116736631	116773224	dbSUPER_CD4p_CD25-_CD45RAp_Naive_SE_17395	504	504	36593	1	0.0137731
NC_000001.11	116752679	116753183	RefSeqFE_silencer_GeneID:107161156	NC_000001.11	116736644	116778951	dbSUPER_DND41_SE_25538	504	504	42307	1	0.0119129
NC_000001.11	116752679	116753183	RefSeqFE_silencer_GeneID:107161156	NC_000001.11	116736674	116779116	dbSUPER_Fetal_Thymus_SE_31052	504	504	42442	1	0.011875
NC_000001.11	116752679	116753183	RefSeqFE_silencer_GeneID:107161156	NC_000001.11	116736677	116778545	dbSUPER_Thymus_SE_55133	504	504	41868	1	0.0120378
NC_000001.11	116752679	116753183	RefSeqFE_silencer_GeneID:107161156	NC_000001.11	116736727	116771428	dbSUPER_CD4_Memory_Primary_7pool_SE_14506	504	504	34701	1	0.0145241
NC_000001.11	116752679	116753183	RefSeqFE_silencer_GeneID:107161156	NC_000001.11	116736738	116771188	dbSUPER_CD4p_CD225int_CD127p_Tmem_SE_16899	504	504	34450	1	0.0146299
NC_000001.11	116752679	116753183	RefSeqFE_silencer_GeneID:107161156	NC_000001.11	116736769	116773329	dbSUPER_CD8_primary_SE_22480	504	504	36560	1	0.0137856
NC_000001.11	116752679	116753183	RefSeqFE_silencer_GeneID:107161156	NC_000001.11	116736823	116771227	dbSUPER_CD8_Naive_8pool_SE_22104	504	504	34404	1	0.0146495
NC_000001.11	116752679	116753183	RefSeqFE_silencer_GeneID:107161156	NC_000001.11	116736982	116771802	dbSUPER_CD3_SE_11896	504	504	34820	1	0.0144744
NC_000001.11	116752679	116753183	RefSeqFE_silencer_GeneID:107161156	NC_000001.11	116736989	116771473	dbSUPER_CD4_Naive_Primary_8pool_SE_16368	504	504	34484	1	0.0146155
NC_000001.11	116752679	116753183	RefSeqFE_silencer_GeneID:107161156	NC_000001.11	116738024	116778714	dbSUPER_RPMI-8402_SE_49995	504	504	40690	1	0.0123863
NC_000001.11	116752679	116753183	RefSeqFE_silencer_GeneID:107161156	NC_000001.11	116752817	116771346	dbSUPER_CD4_Memory_Primary_8pool_SE_15527	366	504	18529	0.72619	0.0197528
NC_000001.11	116752679	116753183	RefSeqFE_silencer_GeneID:107161156	NC_000001.11	116752894	116770778	dbSUPER_CD8_Naive_7pool_SE_21752	289	504	17884	0.573413	0.0161597
NC_000001.11	116752679	116753183	RefSeqFE_silencer_GeneID:107161156	NC_000001.11	116753055	116771342	dbSUPER_CD8_Memory_7pool_SE_20962	128	504	18287	0.253968	0.00699951
NC_000001.11	116752679	116753183	RefSeqFE_silencer_GeneID:107161156	NC_000001.11	116753140	116769725	dbSUPER_CD4_Naive_Primary_7pool_SE_16134	43	504	16585	0.0853175	0.0025927
NC_000001.11	116752679	116753183	RefSeqFE_silencer_GeneID:107161156	NC_000001.11	116736790	116817218	dbSUPER_CD56_SE_20301	504	504	80428	1	0.00626647
NC_000001.11	116752679	116753183	RefSeqFE_silencer_GeneID:107161156	NC_000001.11	116736849	116785451	dbSUPER_Jurkat_SE_39406	504	504	48602	1	0.0103699
NC_000001.11	116753016	116753046	RefSeqFE_transcriptional_cis_regulatory_region_GeneID:107161156	NC_000001.11	116752999	116761001	Ensembl104_promoter:ENSR00000370043	30	30	8002	1	0.00374906
NC_000001.11	116753016	116753046	RefSeqFE_transcriptional_cis_regulatory_region_GeneID:107161156	NC_000001.11	116735820	116778689	dbSUPER_CD4p_CD25-_Il17p_PMAstim_Th17_SE_19106	30	30	42869	1	0.000699806
NC_000001.11	116753016	116753046	RefSeqFE_transcriptional_cis_regulatory_region_GeneID:107161156	NC_000001.11	116736066	116778921	dbSUPER_CD4p_CD25-_Il17-_PMAstim_Th_SE_18252	30	30	42855	1	0.000700035
NC_000001.11	116753016	116753046	RefSeqFE_transcriptional_cis_regulatory_region_GeneID:107161156	NC_000001.11	116736075	116773472	dbSUPER_CD4p_CD25-_CD45ROp_Memory_SE_17793	30	30	37397	1	0.000802203
NC_000001.11	116753016	116753046	RefSeqFE_transcriptional_cis_regulatory_region_GeneID:107161156	NC_000001.11	116736432	116772945	dbSUPER_Tonsil_SE_62556	30	30	36513	1	0.000821625
NC_000001.11	116753016	116753046	RefSeqFE_transcriptional_cis_regulatory_region_GeneID:107161156	NC_000001.11	116736631	116773224	dbSUPER_CD4p_CD25-_CD45RAp_Naive_SE_17395	30	30	36593	1	0.000819829
NC_000001.11	116753016	116753046	RefSeqFE_transcriptional_cis_regulatory_region_GeneID:107161156	NC_000001.11	116736644	116778951	dbSUPER_DND41_SE_25538	30	30	42307	1	0.000709103
NC_000001.11	116753016	116753046	RefSeqFE_transcriptional_cis_regulatory_region_GeneID:107161156	NC_000001.11	116736674	116779116	dbSUPER_Fetal_Thymus_SE_31052	30	30	42442	1	0.000706847
NC_000001.11	116753016	116753046	RefSeqFE_transcriptional_cis_regulatory_region_GeneID:107161156	NC_000001.11	116736677	116778545	dbSUPER_Thymus_SE_55133	30	30	41868	1	0.000716538
NC_000001.11	116753016	116753046	RefSeqFE_transcriptional_cis_regulatory_region_GeneID:107161156	NC_000001.11	116736727	116771428	dbSUPER_CD4_Memory_Primary_7pool_SE_14506	30	30	34701	1	0.000864528
NC_000001.11	116753016	116753046	RefSeqFE_transcriptional_cis_regulatory_region_GeneID:107161156	NC_000001.11	116736738	116771188	dbSUPER_CD4p_CD225int_CD127p_Tmem_SE_16899	30	30	34450	1	0.000870827
NC_000001.11	116753016	116753046	RefSeqFE_transcriptional_cis_regulatory_region_GeneID:107161156	NC_000001.11	116736769	116773329	dbSUPER_CD8_primary_SE_22480	30	30	36560	1	0.000820569
NC_000001.11	116753016	116753046	RefSeqFE_transcriptional_cis_regulatory_region_GeneID:107161156	NC_000001.11	116736823	116771227	dbSUPER_CD8_Naive_8pool_SE_22104	30	30	34404	1	0.000871992
NC_000001.11	116753016	116753046	RefSeqFE_transcriptional_cis_regulatory_region_GeneID:107161156	NC_000001.11	116736982	116771802	dbSUPER_CD3_SE_11896	30	30	34820	1	0.000861574
NC_000001.11	116753016	116753046	RefSeqFE_transcriptional_cis_regulatory_region_GeneID:107161156	NC_000001.11	116736989	116771473	dbSUPER_CD4_Naive_Primary_8pool_SE_16368	30	30	34484	1	0.000869969
NC_000001.11	116753016	116753046	RefSeqFE_transcriptional_cis_regulatory_region_GeneID:107161156	NC_000001.11	116738024	116778714	dbSUPER_RPMI-8402_SE_49995	30	30	40690	1	0.000737282
NC_000001.11	116753016	116753046	RefSeqFE_transcriptional_cis_regulatory_region_GeneID:107161156	NC_000001.11	116752817	116771346	dbSUPER_CD4_Memory_Primary_8pool_SE_15527	30	30	18529	1	0.00161908
NC_000001.11	116753016	116753046	RefSeqFE_transcriptional_cis_regulatory_region_GeneID:107161156	NC_000001.11	116752894	116770778	dbSUPER_CD8_Naive_7pool_SE_21752	30	30	17884	1	0.00167748
NC_000001.11	116753016	116753046	RefSeqFE_transcriptional_cis_regulatory_region_GeneID:107161156	NC_000001.11	116736790	116817218	dbSUPER_CD56_SE_20301	30	30	80428	1	0.000373004
NC_000001.11	116753016	116753046	RefSeqFE_transcriptional_cis_regulatory_region_GeneID:107161156	NC_000001.11	116736849	116785451	dbSUPER_Jurkat_SE_39406	30	30	48602	1	0.000617259
NC_000001.11	116754104	116754547	RefSeqFE_promoter_GeneID:107161156	NC_000001.11	116752999	116761001	Ensembl104_promoter:ENSR00000370043	443	443	8002	1	0.0553612
NC_000001.11	116754104	116754547	RefSeqFE_promoter_GeneID:107161156	NC_000001.11	116754227	116754571	ENCODEcCRE_EH38E1379884_promoter	320	443	344	0.722348	0.930233
NC_000001.11	116754104	116754547	RefSeqFE_promoter_GeneID:107161156	NC_000001.11	116735820	116778689	dbSUPER_CD4p_CD25-_Il17p_PMAstim_Th17_SE_19106	443	443	42869	1	0.0103338
NC_000001.11	116754104	116754547	RefSeqFE_promoter_GeneID:107161156	NC_000001.11	116736066	116778921	dbSUPER_CD4p_CD25-_Il17-_PMAstim_Th_SE_18252	443	443	42855	1	0.0103372
NC_000001.11	116754104	116754547	RefSeqFE_promoter_GeneID:107161156	NC_000001.11	116736075	116773472	dbSUPER_CD4p_CD25-_CD45ROp_Memory_SE_17793	443	443	37397	1	0.0118459
NC_000001.11	116754104	116754547	RefSeqFE_promoter_GeneID:107161156	NC_000001.11	116736432	116772945	dbSUPER_Tonsil_SE_62556	443	443	36513	1	0.0121327
NC_000001.11	116754104	116754547	RefSeqFE_promoter_GeneID:107161156	NC_000001.11	116736631	116773224	dbSUPER_CD4p_CD25-_CD45RAp_Naive_SE_17395	443	443	36593	1	0.0121061
NC_000001.11	116754104	116754547	RefSeqFE_promoter_GeneID:107161156	NC_000001.11	116736644	116778951	dbSUPER_DND41_SE_25538	443	443	42307	1	0.0104711
NC_000001.11	116754104	116754547	RefSeqFE_promoter_GeneID:107161156	NC_000001.11	116736674	116779116	dbSUPER_Fetal_Thymus_SE_31052	443	443	42442	1	0.0104378
NC_000001.11	116754104	116754547	RefSeqFE_promoter_GeneID:107161156	NC_000001.11	116736677	116778545	dbSUPER_Thymus_SE_55133	443	443	41868	1	0.0105809
NC_000001.11	116754104	116754547	RefSeqFE_promoter_GeneID:107161156	NC_000001.11	116736727	116771428	dbSUPER_CD4_Memory_Primary_7pool_SE_14506	443	443	34701	1	0.0127662
NC_000001.11	116754104	116754547	RefSeqFE_promoter_GeneID:107161156	NC_000001.11	116736738	116771188	dbSUPER_CD4p_CD225int_CD127p_Tmem_SE_16899	443	443	34450	1	0.0128592
NC_000001.11	116754104	116754547	RefSeqFE_promoter_GeneID:107161156	NC_000001.11	116736769	116773329	dbSUPER_CD8_primary_SE_22480	443	443	36560	1	0.0121171
NC_000001.11	116754104	116754547	RefSeqFE_promoter_GeneID:107161156	NC_000001.11	116736823	116771227	dbSUPER_CD8_Naive_8pool_SE_22104	443	443	34404	1	0.0128764
NC_000001.11	116754104	116754547	RefSeqFE_promoter_GeneID:107161156	NC_000001.11	116736982	116771802	dbSUPER_CD3_SE_11896	443	443	34820	1	0.0127226
NC_000001.11	116754104	116754547	RefSeqFE_promoter_GeneID:107161156	NC_000001.11	116736989	116771473	dbSUPER_CD4_Naive_Primary_8pool_SE_16368	443	443	34484	1	0.0128465
NC_000001.11	116754104	116754547	RefSeqFE_promoter_GeneID:107161156	NC_000001.11	116738024	116778714	dbSUPER_RPMI-8402_SE_49995	443	443	40690	1	0.0108872
NC_000001.11	116754104	116754547	RefSeqFE_promoter_GeneID:107161156	NC_000001.11	116752817	116771346	dbSUPER_CD4_Memory_Primary_8pool_SE_15527	443	443	18529	1	0.0239085
NC_000001.11	116754104	116754547	RefSeqFE_promoter_GeneID:107161156	NC_000001.11	116752894	116770778	dbSUPER_CD8_Naive_7pool_SE_21752	443	443	17884	1	0.0247707
NC_000001.11	116754104	116754547	RefSeqFE_promoter_GeneID:107161156	NC_000001.11	116753055	116771342	dbSUPER_CD8_Memory_7pool_SE_20962	443	443	18287	1	0.0242249
NC_000001.11	116754104	116754547	RefSeqFE_promoter_GeneID:107161156	NC_000001.11	116753140	116769725	dbSUPER_CD4_Naive_Primary_7pool_SE_16134	443	443	16585	1	0.0267109
NC_000001.11	116754104	116754547	RefSeqFE_promoter_GeneID:107161156	NC_000001.11	116736790	116817218	dbSUPER_CD56_SE_20301	443	443	80428	1	0.00550803
NC_000001.11	116754104	116754547	RefSeqFE_promoter_GeneID:107161156	NC_000001.11	116736849	116785451	dbSUPER_Jurkat_SE_39406	443	443	48602	1	0.00911485
NC_000001.11	116754124	116754524	RefSeqFE_DNAseI_hypersensitive_site_GeneID:107161156	NC_000001.11	116752999	116761001	Ensembl104_promoter:ENSR00000370043	400	400	8002	1	0.0499875
NC_000001.11	116754124	116754524	RefSeqFE_DNAseI_hypersensitive_site_GeneID:107161156	NC_000001.11	116754227	116754571	ENCODEcCRE_EH38E1379884_promoter	297	400	344	0.7425	0.863372
NC_000001.11	116754124	116754524	RefSeqFE_DNAseI_hypersensitive_site_GeneID:107161156	NC_000001.11	116735820	116778689	dbSUPER_CD4p_CD25-_Il17p_PMAstim_Th17_SE_19106	400	400	42869	1	0.00933075
NC_000001.11	116754124	116754524	RefSeqFE_DNAseI_hypersensitive_site_GeneID:107161156	NC_000001.11	116736066	116778921	dbSUPER_CD4p_CD25-_Il17-_PMAstim_Th_SE_18252	400	400	42855	1	0.0093338
NC_000001.11	116754124	116754524	RefSeqFE_DNAseI_hypersensitive_site_GeneID:107161156	NC_000001.11	116736075	116773472	dbSUPER_CD4p_CD25-_CD45ROp_Memory_SE_17793	400	400	37397	1	0.010696
NC_000001.11	116754124	116754524	RefSeqFE_DNAseI_hypersensitive_site_GeneID:107161156	NC_000001.11	116736432	116772945	dbSUPER_Tonsil_SE_62556	400	400	36513	1	0.010955
NC_000001.11	116754124	116754524	RefSeqFE_DNAseI_hypersensitive_site_GeneID:107161156	NC_000001.11	116736631	116773224	dbSUPER_CD4p_CD25-_CD45RAp_Naive_SE_17395	400	400	36593	1	0.0109311
NC_000001.11	116754124	116754524	RefSeqFE_DNAseI_hypersensitive_site_GeneID:107161156	NC_000001.11	116736644	116778951	dbSUPER_DND41_SE_25538	400	400	42307	1	0.0094547
NC_000001.11	116754124	116754524	RefSeqFE_DNAseI_hypersensitive_site_GeneID:107161156	NC_000001.11	116736674	116779116	dbSUPER_Fetal_Thymus_SE_31052	400	400	42442	1	0.00942463
NC_000001.11	116754124	116754524	RefSeqFE_DNAseI_hypersensitive_site_GeneID:107161156	NC_000001.11	116736677	116778545	dbSUPER_Thymus_SE_55133	400	400	41868	1	0.00955384
NC_000001.11	116754124	116754524	RefSeqFE_DNAseI_hypersensitive_site_GeneID:107161156	NC_000001.11	116736727	116771428	dbSUPER_CD4_Memory_Primary_7pool_SE_14506	400	400	34701	1	0.011527
NC_000001.11	116754124	116754524	RefSeqFE_DNAseI_hypersensitive_site_GeneID:107161156	NC_000001.11	116736738	116771188	dbSUPER_CD4p_CD225int_CD127p_Tmem_SE_16899	400	400	34450	1	0.011611
NC_000001.11	116754124	116754524	RefSeqFE_DNAseI_hypersensitive_site_GeneID:107161156	NC_000001.11	116736769	116773329	dbSUPER_CD8_primary_SE_22480	400	400	36560	1	0.0109409
NC_000001.11	116754124	116754524	RefSeqFE_DNAseI_hypersensitive_site_GeneID:107161156	NC_000001.11	116736823	116771227	dbSUPER_CD8_Naive_8pool_SE_22104	400	400	34404	1	0.0116266
NC_000001.11	116754124	116754524	RefSeqFE_DNAseI_hypersensitive_site_GeneID:107161156	NC_000001.11	116736982	116771802	dbSUPER_CD3_SE_11896	400	400	34820	1	0.0114877
NC_000001.11	116754124	116754524	RefSeqFE_DNAseI_hypersensitive_site_GeneID:107161156	NC_000001.11	116736989	116771473	dbSUPER_CD4_Naive_Primary_8pool_SE_16368	400	400	34484	1	0.0115996
NC_000001.11	116754124	116754524	RefSeqFE_DNAseI_hypersensitive_site_GeneID:107161156	NC_000001.11	116738024	116778714	dbSUPER_RPMI-8402_SE_49995	400	400	40690	1	0.00983043
NC_000001.11	116754124	116754524	RefSeqFE_DNAseI_hypersensitive_site_GeneID:107161156	NC_000001.11	116752817	116771346	dbSUPER_CD4_Memory_Primary_8pool_SE_15527	400	400	18529	1	0.0215878
NC_000001.11	116754124	116754524	RefSeqFE_DNAseI_hypersensitive_site_GeneID:107161156	NC_000001.11	116752894	116770778	dbSUPER_CD8_Naive_7pool_SE_21752	400	400	17884	1	0.0223664
NC_000001.11	116754124	116754524	RefSeqFE_DNAseI_hypersensitive_site_GeneID:107161156	NC_000001.11	116753055	116771342	dbSUPER_CD8_Memory_7pool_SE_20962	400	400	18287	1	0.0218735
NC_000001.11	116754124	116754524	RefSeqFE_DNAseI_hypersensitive_site_GeneID:107161156	NC_000001.11	116753140	116769725	dbSUPER_CD4_Naive_Primary_7pool_SE_16134	400	400	16585	1	0.0241182
NC_000001.11	116754124	116754524	RefSeqFE_DNAseI_hypersensitive_site_GeneID:107161156	NC_000001.11	116736790	116817218	dbSUPER_CD56_SE_20301	400	400	80428	1	0.00497339
NC_000001.11	116754124	116754524	RefSeqFE_DNAseI_hypersensitive_site_GeneID:107161156	NC_000001.11	116736849	116785451	dbSUPER_Jurkat_SE_39406	400	400	48602	1	0.00823011
NC_000001.11	116754383	116754413	RefSeqFE_protein_binding_site_upstream_transcription_factor_protein(s)_GeneID:107161156	NC_000001.11	116752999	116761001	Ensembl104_promoter:ENSR00000370043	30	30	8002	1	0.00374906
NC_000001.11	116754383	116754413	RefSeqFE_protein_binding_site_upstream_transcription_factor_protein(s)_GeneID:107161156	NC_000001.11	116754227	116754571	ENCODEcCRE_EH38E1379884_promoter	30	30	344	1	0.0872093
NC_000001.11	116754383	116754413	RefSeqFE_protein_binding_site_upstream_transcription_factor_protein(s)_GeneID:107161156	NC_000001.11	116735820	116778689	dbSUPER_CD4p_CD25-_Il17p_PMAstim_Th17_SE_19106	30	30	42869	1	0.000699806
NC_000001.11	116754383	116754413	RefSeqFE_protein_binding_site_upstream_transcription_factor_protein(s)_GeneID:107161156	NC_000001.11	116736066	116778921	dbSUPER_CD4p_CD25-_Il17-_PMAstim_Th_SE_18252	30	30	42855	1	0.000700035
NC_000001.11	116754383	116754413	RefSeqFE_protein_binding_site_upstream_transcription_factor_protein(s)_GeneID:107161156	NC_000001.11	116736075	116773472	dbSUPER_CD4p_CD25-_CD45ROp_Memory_SE_17793	30	30	37397	1	0.000802203
NC_000001.11	116754383	116754413	RefSeqFE_protein_binding_site_upstream_transcription_factor_protein(s)_GeneID:107161156	NC_000001.11	116736432	116772945	dbSUPER_Tonsil_SE_62556	30	30	36513	1	0.000821625
NC_000001.11	116754383	116754413	RefSeqFE_protein_binding_site_upstream_transcription_factor_protein(s)_GeneID:107161156	NC_000001.11	116736631	116773224	dbSUPER_CD4p_CD25-_CD45RAp_Naive_SE_17395	30	30	36593	1	0.000819829
NC_000001.11	116754383	116754413	RefSeqFE_protein_binding_site_upstream_transcription_factor_protein(s)_GeneID:107161156	NC_000001.11	116736644	116778951	dbSUPER_DND41_SE_25538	30	30	42307	1	0.000709103
NC_000001.11	116754383	116754413	RefSeqFE_protein_binding_site_upstream_transcription_factor_protein(s)_GeneID:107161156	NC_000001.11	116736674	116779116	dbSUPER_Fetal_Thymus_SE_31052	30	30	42442	1	0.000706847
NC_000001.11	116754383	116754413	RefSeqFE_protein_binding_site_upstream_transcription_factor_protein(s)_GeneID:107161156	NC_000001.11	116736677	116778545	dbSUPER_Thymus_SE_55133	30	30	41868	1	0.000716538
NC_000001.11	116754383	116754413	RefSeqFE_protein_binding_site_upstream_transcription_factor_protein(s)_GeneID:107161156	NC_000001.11	116736727	116771428	dbSUPER_CD4_Memory_Primary_7pool_SE_14506	30	30	34701	1	0.000864528
NC_000001.11	116754383	116754413	RefSeqFE_protein_binding_site_upstream_transcription_factor_protein(s)_GeneID:107161156	NC_000001.11	116736738	116771188	dbSUPER_CD4p_CD225int_CD127p_Tmem_SE_16899	30	30	34450	1	0.000870827
NC_000001.11	116754383	116754413	RefSeqFE_protein_binding_site_upstream_transcription_factor_protein(s)_GeneID:107161156	NC_000001.11	116736769	116773329	dbSUPER_CD8_primary_SE_22480	30	30	36560	1	0.000820569
NC_000001.11	116754383	116754413	RefSeqFE_protein_binding_site_upstream_transcription_factor_protein(s)_GeneID:107161156	NC_000001.11	116736823	116771227	dbSUPER_CD8_Naive_8pool_SE_22104	30	30	34404	1	0.000871992
NC_000001.11	116754383	116754413	RefSeqFE_protein_binding_site_upstream_transcription_factor_protein(s)_GeneID:107161156	NC_000001.11	116736982	116771802	dbSUPER_CD3_SE_11896	30	30	34820	1	0.000861574
NC_000001.11	116754383	116754413	RefSeqFE_protein_binding_site_upstream_transcription_factor_protein(s)_GeneID:107161156	NC_000001.11	116736989	116771473	dbSUPER_CD4_Naive_Primary_8pool_SE_16368	30	30	34484	1	0.000869969
NC_000001.11	116754383	116754413	RefSeqFE_protein_binding_site_upstream_transcription_factor_protein(s)_GeneID:107161156	NC_000001.11	116738024	116778714	dbSUPER_RPMI-8402_SE_49995	30	30	40690	1	0.000737282
NC_000001.11	116754383	116754413	RefSeqFE_protein_binding_site_upstream_transcription_factor_protein(s)_GeneID:107161156	NC_000001.11	116752817	116771346	dbSUPER_CD4_Memory_Primary_8pool_SE_15527	30	30	18529	1	0.00161908
NC_000001.11	116754383	116754413	RefSeqFE_protein_binding_site_upstream_transcription_factor_protein(s)_GeneID:107161156	NC_000001.11	116752894	116770778	dbSUPER_CD8_Naive_7pool_SE_21752	30	30	17884	1	0.00167748
NC_000001.11	116754383	116754413	RefSeqFE_protein_binding_site_upstream_transcription_factor_protein(s)_GeneID:107161156	NC_000001.11	116753055	116771342	dbSUPER_CD8_Memory_7pool_SE_20962	30	30	18287	1	0.00164051
NC_000001.11	116754383	116754413	RefSeqFE_protein_binding_site_upstream_transcription_factor_protein(s)_GeneID:107161156	NC_000001.11	116753140	116769725	dbSUPER_CD4_Naive_Primary_7pool_SE_16134	30	30	16585	1	0.00180886
NC_000001.11	116754383	116754413	RefSeqFE_protein_binding_site_upstream_transcription_factor_protein(s)_GeneID:107161156	NC_000001.11	116736790	116817218	dbSUPER_CD56_SE_20301	30	30	80428	1	0.000373004
NC_000001.11	116754383	116754413	RefSeqFE_protein_binding_site_upstream_transcription_factor_protein(s)_GeneID:107161156	NC_000001.11	116736849	116785451	dbSUPER_Jurkat_SE_39406	30	30	48602	1	0.000617259
NC_000001.11	116769216	116770316	RefSeqFE_enhancer_GeneID:107126361	NC_000001.11	116769040	116769380	ENCODEcCRE_EH38E1379912_distal_enhancer	164	1100	340	0.149091	0.482353
NC_000001.11	116769216	116770316	RefSeqFE_enhancer_GeneID:107126361	NC_000001.11	116769636	116769980	ENCODEcCRE_EH38E1379913_distal_enhancer	344	1100	344	0.312727	1
NC_000001.11	116769216	116770316	RefSeqFE_enhancer_GeneID:107126361	NC_000001.11	116735820	116778689	dbSUPER_CD4p_CD25-_Il17p_PMAstim_Th17_SE_19106	1100	1100	42869	1	0.0256596
NC_000001.11	116769216	116770316	RefSeqFE_enhancer_GeneID:107126361	NC_000001.11	116736066	116778921	dbSUPER_CD4p_CD25-_Il17-_PMAstim_Th_SE_18252	1100	1100	42855	1	0.025668
NC_000001.11	116769216	116770316	RefSeqFE_enhancer_GeneID:107126361	NC_000001.11	116736075	116773472	dbSUPER_CD4p_CD25-_CD45ROp_Memory_SE_17793	1100	1100	37397	1	0.0294141
NC_000001.11	116769216	116770316	RefSeqFE_enhancer_GeneID:107126361	NC_000001.11	116736432	116772945	dbSUPER_Tonsil_SE_62556	1100	1100	36513	1	0.0301263
NC_000001.11	116769216	116770316	RefSeqFE_enhancer_GeneID:107126361	NC_000001.11	116736631	116773224	dbSUPER_CD4p_CD25-_CD45RAp_Naive_SE_17395	1100	1100	36593	1	0.0300604
NC_000001.11	116769216	116770316	RefSeqFE_enhancer_GeneID:107126361	NC_000001.11	116736644	116778951	dbSUPER_DND41_SE_25538	1100	1100	42307	1	0.0260004
NC_000001.11	116769216	116770316	RefSeqFE_enhancer_GeneID:107126361	NC_000001.11	116736674	116779116	dbSUPER_Fetal_Thymus_SE_31052	1100	1100	42442	1	0.0259177
NC_000001.11	116769216	116770316	RefSeqFE_enhancer_GeneID:107126361	NC_000001.11	116736677	116778545	dbSUPER_Thymus_SE_55133	1100	1100	41868	1	0.026273
NC_000001.11	116769216	116770316	RefSeqFE_enhancer_GeneID:107126361	NC_000001.11	116736727	116771428	dbSUPER_CD4_Memory_Primary_7pool_SE_14506	1100	1100	34701	1	0.0316994
NC_000001.11	116769216	116770316	RefSeqFE_enhancer_GeneID:107126361	NC_000001.11	116736738	116771188	dbSUPER_CD4p_CD225int_CD127p_Tmem_SE_16899	1100	1100	34450	1	0.0319303
NC_000001.11	116769216	116770316	RefSeqFE_enhancer_GeneID:107126361	NC_000001.11	116736769	116773329	dbSUPER_CD8_primary_SE_22480	1100	1100	36560	1	0.0300875
NC_000001.11	116769216	116770316	RefSeqFE_enhancer_GeneID:107126361	NC_000001.11	116736823	116771227	dbSUPER_CD8_Naive_8pool_SE_22104	1100	1100	34404	1	0.031973
NC_000001.11	116769216	116770316	RefSeqFE_enhancer_GeneID:107126361	NC_000001.11	116736982	116771802	dbSUPER_CD3_SE_11896	1100	1100	34820	1	0.031591
NC_000001.11	116769216	116770316	RefSeqFE_enhancer_GeneID:107126361	NC_000001.11	116736989	116771473	dbSUPER_CD4_Naive_Primary_8pool_SE_16368	1100	1100	34484	1	0.0318989
NC_000001.11	116769216	116770316	RefSeqFE_enhancer_GeneID:107126361	NC_000001.11	116738024	116778714	dbSUPER_RPMI-8402_SE_49995	1100	1100	40690	1	0.0270337
NC_000001.11	116769216	116770316	RefSeqFE_enhancer_GeneID:107126361	NC_000001.11	116752817	116771346	dbSUPER_CD4_Memory_Primary_8pool_SE_15527	1100	1100	18529	1	0.0593664
NC_000001.11	116769216	116770316	RefSeqFE_enhancer_GeneID:107126361	NC_000001.11	116752894	116770778	dbSUPER_CD8_Naive_7pool_SE_21752	1100	1100	17884	1	0.0615075
NC_000001.11	116769216	116770316	RefSeqFE_enhancer_GeneID:107126361	NC_000001.11	116753055	116771342	dbSUPER_CD8_Memory_7pool_SE_20962	1100	1100	18287	1	0.060152
NC_000001.11	116769216	116770316	RefSeqFE_enhancer_GeneID:107126361	NC_000001.11	116753140	116769725	dbSUPER_CD4_Naive_Primary_7pool_SE_16134	509	1100	16585	0.462727	0.0306904
NC_000001.11	116769216	116770316	RefSeqFE_enhancer_GeneID:107126361	NC_000001.11	116736790	116817218	dbSUPER_CD56_SE_20301	1100	1100	80428	1	0.0136768
NC_000001.11	116769216	116770316	RefSeqFE_enhancer_GeneID:107126361	NC_000001.11	116736849	116785451	dbSUPER_Jurkat_SE_39406	1100	1100	48602	1	0.0226328
NC_000001.11	116769216	116770516	RefSeqFE_enhancer_GeneID:107126361	NC_000001.11	116769040	116769380	ENCODEcCRE_EH38E1379912_distal_enhancer	164	1300	340	0.126154	0.482353
NC_000001.11	116769216	116770516	RefSeqFE_enhancer_GeneID:107126361	NC_000001.11	116769636	116769980	ENCODEcCRE_EH38E1379913_distal_enhancer	344	1300	344	0.264615	1
NC_000001.11	116769216	116770516	RefSeqFE_enhancer_GeneID:107126361	NC_000001.11	116770473	116770639	ENCODEcCRE_EH38E1379914_distal_enhancer	43	1300	166	0.0330769	0.259036
NC_000001.11	116769216	116770516	RefSeqFE_enhancer_GeneID:107126361	NC_000001.11	116735820	116778689	dbSUPER_CD4p_CD25-_Il17p_PMAstim_Th17_SE_19106	1300	1300	42869	1	0.0303249
NC_000001.11	116769216	116770516	RefSeqFE_enhancer_GeneID:107126361	NC_000001.11	116736066	116778921	dbSUPER_CD4p_CD25-_Il17-_PMAstim_Th_SE_18252	1300	1300	42855	1	0.0303349
NC_000001.11	116769216	116770516	RefSeqFE_enhancer_GeneID:107126361	NC_000001.11	116736075	116773472	dbSUPER_CD4p_CD25-_CD45ROp_Memory_SE_17793	1300	1300	37397	1	0.0347621
NC_000001.11	116769216	116770516	RefSeqFE_enhancer_GeneID:107126361	NC_000001.11	116736432	116772945	dbSUPER_Tonsil_SE_62556	1300	1300	36513	1	0.0356038
NC_000001.11	116769216	116770516	RefSeqFE_enhancer_GeneID:107126361	NC_000001.11	116736631	116773224	dbSUPER_CD4p_CD25-_CD45RAp_Naive_SE_17395	1300	1300	36593	1	0.0355259
NC_000001.11	116769216	116770516	RefSeqFE_enhancer_GeneID:107126361	NC_000001.11	116736644	116778951	dbSUPER_DND41_SE_25538	1300	1300	42307	1	0.0307278
NC_000001.11	116769216	116770516	RefSeqFE_enhancer_GeneID:107126361	NC_000001.11	116736674	116779116	dbSUPER_Fetal_Thymus_SE_31052	1300	1300	42442	1	0.03063
NC_000001.11	116769216	116770516	RefSeqFE_enhancer_GeneID:107126361	NC_000001.11	116736677	116778545	dbSUPER_Thymus_SE_55133	1300	1300	41868	1	0.03105
NC_000001.11	116769216	116770516	RefSeqFE_enhancer_GeneID:107126361	NC_000001.11	116736727	116771428	dbSUPER_CD4_Memory_Primary_7pool_SE_14506	1300	1300	34701	1	0.0374629
NC_000001.11	116769216	116770516	RefSeqFE_enhancer_GeneID:107126361	NC_000001.11	116736738	116771188	dbSUPER_CD4p_CD225int_CD127p_Tmem_SE_16899	1300	1300	34450	1	0.0377358
NC_000001.11	116769216	116770516	RefSeqFE_enhancer_GeneID:107126361	NC_000001.11	116736769	116773329	dbSUPER_CD8_primary_SE_22480	1300	1300	36560	1	0.035558
NC_000001.11	116769216	116770516	RefSeqFE_enhancer_GeneID:107126361	NC_000001.11	116736823	116771227	dbSUPER_CD8_Naive_8pool_SE_22104	1300	1300	34404	1	0.0377863
NC_000001.11	116769216	116770516	RefSeqFE_enhancer_GeneID:107126361	NC_000001.11	116736982	116771802	dbSUPER_CD3_SE_11896	1300	1300	34820	1	0.0373349
NC_000001.11	116769216	116770516	RefSeqFE_enhancer_GeneID:107126361	NC_000001.11	116736989	116771473	dbSUPER_CD4_Naive_Primary_8pool_SE_16368	1300	1300	34484	1	0.0376986
NC_000001.11	116769216	116770516	RefSeqFE_enhancer_GeneID:107126361	NC_000001.11	116738024	116778714	dbSUPER_RPMI-8402_SE_49995	1300	1300	40690	1	0.0319489
NC_000001.11	116769216	116770516	RefSeqFE_enhancer_GeneID:107126361	NC_000001.11	116752817	116771346	dbSUPER_CD4_Memory_Primary_8pool_SE_15527	1300	1300	18529	1	0.0701603
NC_000001.11	116769216	116770516	RefSeqFE_enhancer_GeneID:107126361	NC_000001.11	116752894	116770778	dbSUPER_CD8_Naive_7pool_SE_21752	1300	1300	17884	1	0.0726907
NC_000001.11	116769216	116770516	RefSeqFE_enhancer_GeneID:107126361	NC_000001.11	116753055	116771342	dbSUPER_CD8_Memory_7pool_SE_20962	1300	1300	18287	1	0.0710888
NC_000001.11	116769216	116770516	RefSeqFE_enhancer_GeneID:107126361	NC_000001.11	116753140	116769725	dbSUPER_CD4_Naive_Primary_7pool_SE_16134	509	1300	16585	0.391538	0.0306904
NC_000001.11	116769216	116770516	RefSeqFE_enhancer_GeneID:107126361	NC_000001.11	116736790	116817218	dbSUPER_CD56_SE_20301	1300	1300	80428	1	0.0161635
NC_000001.11	116769216	116770516	RefSeqFE_enhancer_GeneID:107126361	NC_000001.11	116736849	116785451	dbSUPER_Jurkat_SE_39406	1300	1300	48602	1	0.0267479
NC_000001.11	116769216	116770716	RefSeqFE_enhancer_GeneID:107126361	NC_000001.11	116769040	116769380	ENCODEcCRE_EH38E1379912_distal_enhancer	164	1500	340	0.109333	0.482353
NC_000001.11	116769216	116770716	RefSeqFE_enhancer_GeneID:107126361	NC_000001.11	116769636	116769980	ENCODEcCRE_EH38E1379913_distal_enhancer	344	1500	344	0.229333	1
NC_000001.11	116769216	116770716	RefSeqFE_enhancer_GeneID:107126361	NC_000001.11	116770473	116770639	ENCODEcCRE_EH38E1379914_distal_enhancer	166	1500	166	0.110667	1
[truncated: 46,822 more rows]

## Sheet: S5E_mouse_overlap_output
Supplemental Table S5E. Output for mouse AR 109 RefSeq Functional Element intersections with other gene regulatory datasets, including feature and overlap lengths and degrees of overlap with respect to each dataset feature.
RefSeqFE chr	RefSeqFE start	RefSeqFE stop	RefSeqFE feature	Other dataset chr	Other dataset start	Other dataset stop	Other dataset feature	Overlap length	RefSeqFE feat_length	Other feat_length	RefSeqFE overlap degree	Other overlap degree
NC_000067.7	9718447	9721190	RefSeqFE_enhancer_GeneID:110120427	NC_000067.7	9718447	9721190	VISTA_enhancer_positive_mm1546	2743	2743	2743	1	1
NC_000067.7	9718447	9721190	RefSeqFE_enhancer_GeneID:110120427	NC_000067.7	9718801	9720199	Ensembl104_promoter_flanking_region:ENSMUSR00000476455	1398	2743	1398	0.509661	1
NC_000067.7	9718447	9721190	RefSeqFE_enhancer_GeneID:110120427	NC_000067.7	9719048	9719381	ENCODEcCRE_EM10E0431637_distal_enhancer	333	2743	333	0.1214	1
NC_000067.7	9718447	9721190	RefSeqFE_enhancer_GeneID:110120427	NC_000067.7	9719400	9719600	Ensembl104_CTCF_binding_site:ENSMUSR00000476456	200	2743	200	0.0729129	1
NC_000067.7	9718447	9721190	RefSeqFE_enhancer_GeneID:110120427	NC_000067.7	9719428	9719774	ENCODEcCRE_EM10E0431638_distal_enhancer	346	2743	346	0.126139	1
NC_000067.7	9718447	9721190	RefSeqFE_enhancer_GeneID:110120427	NC_000067.7	9720400	9721200	Ensembl104_enhancer:ENSMUSR00000765694	790	2743	800	0.288006	0.9875
NC_000067.7	12579399	12582117	RefSeqFE_enhancer_GeneID:110120424	NC_000067.7	12578001	12581799	Ensembl104_promoter_flanking_region:ENSMUSR00000476678	2400	2718	3798	0.883002	0.631912
NC_000067.7	12579399	12582117	RefSeqFE_enhancer_GeneID:110120424	NC_000067.7	12579399	12582117	VISTA_enhancer_positive_mm1416	2718	2718	2718	1	1
NC_000067.7	12579399	12582117	RefSeqFE_enhancer_GeneID:110120424	NC_000067.7	12580396	12580614	ENCODEcCRE_EM10E0431937_distal_enhancer	218	2718	218	0.080206	1
NC_000067.7	12579399	12582117	RefSeqFE_enhancer_GeneID:110120424	NC_000067.7	12580614	12580883	ENCODEcCRE_EM10E0431938_distal_enhancer	269	2718	269	0.0989698	1
NC_000067.7	39984769	39989632	RefSeqFE_enhancer_GeneID:109280110	NC_000067.7	39984769	39989632	VISTA_enhancer_positive_mm1333	4863	4863	4863	1	1
NC_000067.7	39984769	39989632	RefSeqFE_enhancer_GeneID:109280110	NC_000067.7	39986910	39987260	ENCODEcCRE_EM10E0435702_distal_enhancer	350	4863	350	0.071972	1
NC_000067.7	39984769	39989632	RefSeqFE_enhancer_GeneID:109280110	NC_000067.7	39987267	39987532	ENCODEcCRE_EM10E0435703_distal_enhancer	265	4863	265	0.0544931	1
NC_000067.7	39984769	39989632	RefSeqFE_enhancer_GeneID:109280110	NC_000067.7	39988400	39988800	Ensembl104_CTCF_binding_site:ENSMUSR00000479136	400	4863	400	0.0822538	1
NC_000067.7	39984769	39989632	RefSeqFE_enhancer_GeneID:109280110	NC_000067.7	39988491	39988654	ENCODEcCRE_EM10E0435704_distal_enhancer	163	4863	163	0.0335184	1
NC_000067.7	39984769	39989632	RefSeqFE_enhancer_GeneID:109280110	NC_000067.7	39989200	39989600	Ensembl104_CTCF_binding_site:ENSMUSR00000295203	400	4863	400	0.0822538	1
NC_000067.7	39984769	39989632	RefSeqFE_enhancer_GeneID:109280110	NC_000067.7	39989227	39989570	ENCODEcCRE_EM10E0435705_distal_enhancer	343	4863	343	0.0705326	1
NC_000067.7	39984769	39989632	RefSeqFE_enhancer_GeneID:109280110	NC_000067.7	39935598	39996319	dbSUPER_Th_Cells_mSE_01170	4863	4863	60721	1	0.0800876
NC_000067.7	39984769	39989632	RefSeqFE_enhancer_GeneID:109280110	NC_000067.7	39971649	40008043	dbSUPER_Hair_follicle_stem_cells_mSE_02813	4863	4863	36394	1	0.133621
NC_000067.7	41313635	41315206	RefSeqFE_enhancer_GeneID:114827887	NC_000067.7	41313635	41315206	VISTA_enhancer_positive_mm1643	1571	1571	1571	1	1
NC_000067.7	41313635	41315206	RefSeqFE_enhancer_GeneID:114827887	NC_000067.7	41313792	41314019	ENCODEcCRE_EM10E0436014_distal_enhancer	227	1571	227	0.144494	1
NC_000067.7	41313635	41315206	RefSeqFE_enhancer_GeneID:114827887	NC_000067.7	41313800	41314000	Ensembl104_CTCF_binding_site:ENSMUSR00000295327	200	1571	200	0.127307	1
NC_000067.7	41313635	41315206	RefSeqFE_enhancer_GeneID:114827887	NC_000067.7	41314150	41314322	ENCODEcCRE_EM10E0436015_distal_enhancer	172	1571	172	0.109484	1
NC_000067.7	41313635	41315206	RefSeqFE_enhancer_GeneID:114827887	NC_000067.7	41314380	41314700	ENCODEcCRE_EM10E0436016_distal_enhancer	320	1571	320	0.203692	1
NC_000067.7	41313635	41315206	RefSeqFE_enhancer_GeneID:114827887	NC_000067.7	41314842	41315090	ENCODEcCRE_EM10E0436017_distal_enhancer	248	1571	248	0.157861	1
NC_000067.7	56325488	56326702	RefSeqFE_enhancer_GeneID:109279972	NC_000067.7	56325488	56326702	VISTA_enhancer_positive_mm613	1214	1214	1214	1	1
NC_000067.7	56325488	56326702	RefSeqFE_enhancer_GeneID:109279972	NC_000067.7	56325800	56326000	Ensembl104_promoter_flanking_region:ENSMUSR00000480519	200	1214	200	0.164745	1
NC_000067.7	57369076	57369889	RefSeqFE_enhancer_GeneID:106707176	NC_000067.7	57367001	57369199	Ensembl104_promoter_flanking_region:ENSMUSR00000767220	123	813	2198	0.151292	0.05596
NC_000067.7	57369076	57369889	RefSeqFE_enhancer_GeneID:106707176	NC_000067.7	57368970	57369178	ENCODEcCRE_EM10E0438127_distal_enhancer	102	813	208	0.125461	0.490385
NC_000067.7	57369076	57369889	RefSeqFE_enhancer_GeneID:106707176	NC_000067.7	57369599	57370000	Ensembl104_enhancer:ENSMUSR00000767221	290	813	401	0.356704	0.723192
NC_000067.7	57369492	57369817	RefSeqFE_conserved_region_GeneID:106707176	NC_000067.7	57369599	57370000	Ensembl104_enhancer:ENSMUSR00000767221	218	325	401	0.670769	0.543641
NC_000067.7	57369550	57369723	RefSeqFE_mobile_genetic_element_GeneID:106707176	NC_000067.7	57369599	57370000	Ensembl104_enhancer:ENSMUSR00000767221	124	173	401	0.716763	0.309227
NC_000067.7	59373081	59374592	RefSeqFE_enhancer_GeneID:110120428	NC_000067.7	59370401	59374399	Ensembl104_promoter_flanking_region:ENSMUSR00000480878	1318	1511	3998	0.87227	0.329665
NC_000067.7	59373081	59374592	RefSeqFE_enhancer_GeneID:110120428	NC_000067.7	59373081	59374592	VISTA_enhancer_positive_mm1575	1511	1511	1511	1	1
NC_000067.7	59373081	59374592	RefSeqFE_enhancer_GeneID:110120428	NC_000067.7	59373330	59373638	ENCODEcCRE_EM10E0438671_distal_enhancer	308	1511	308	0.203839	1
NC_000067.7	59373081	59374592	RefSeqFE_enhancer_GeneID:110120428	NC_000067.7	59373676	59373919	ENCODEcCRE_EM10E0438672_distal_enhancer	243	1511	243	0.160821	1
NC_000067.7	59380020	59381205	RefSeqFE_enhancer_GeneID:109279966	NC_000067.7	59380020	59381205	VISTA_enhancer_positive_mm489	1185	1185	1185	1	1
NC_000067.7	59380020	59381205	RefSeqFE_enhancer_GeneID:109279966	NC_000067.7	59380122	59380422	ENCODEcCRE_EM10E0438674_distal_enhancer	300	1185	300	0.253165	1
NC_000067.7	59380020	59381205	RefSeqFE_enhancer_GeneID:109279966	NC_000067.7	59380462	59380669	ENCODEcCRE_EM10E0438675_distal_enhancer	207	1185	207	0.174684	1
NC_000067.7	61241360	61243741	RefSeqFE_enhancer_GeneID:110120429	NC_000067.7	61242549	61242733	ENCODEcCRE_EM10E0439308_distal_enhancer	184	2381	184	0.0772785	1
NC_000067.7	61241360	61243741	RefSeqFE_enhancer_GeneID:110120429	NC_000067.7	61242828	61243028	ENCODEcCRE_EM10E0439309_distal_enhancer	200	2381	200	0.0839983	1
NC_000067.7	61241360	61243741	RefSeqFE_enhancer_GeneID:110120429	NC_000067.7	61241360	61243741	VISTA_enhancer_positive_mm1601	2381	2381	2381	1	1
NC_000067.7	64032452	64035731	RefSeqFE_enhancer_GeneID:110120373	NC_000067.7	64032452	64035731	VISTA_enhancer_positive_mm997	3279	3279	3279	1	1
NC_000067.7	64032452	64035731	RefSeqFE_enhancer_GeneID:110120373	NC_000067.7	64033443	64033788	ENCODEcCRE_EM10E0439820_distal_enhancer	345	3279	345	0.105215	1
NC_000067.7	64032452	64035731	RefSeqFE_enhancer_GeneID:110120373	NC_000067.7	64033855	64034161	ENCODEcCRE_EM10E0439821_distal_enhancer	306	3279	306	0.0933211	1
NC_000067.7	64032452	64035731	RefSeqFE_enhancer_GeneID:110120373	NC_000067.7	64034187	64034534	ENCODEcCRE_EM10E0439822_distal_enhancer	347	3279	347	0.105825	1
NC_000067.7	67834087	67835623	RefSeqFE_enhancer_GeneID:110120367	NC_000067.7	67833800	67834600	Ensembl104_enhancer:ENSMUSR00000481955	513	1536	800	0.333984	0.64125
NC_000067.7	67834087	67835623	RefSeqFE_enhancer_GeneID:110120367	NC_000067.7	67834087	67835623	VISTA_enhancer_positive_mm148	1536	1536	1536	1	1
NC_000067.7	74149394	74151822	RefSeqFE_enhancer_GeneID:114827884	NC_000067.7	74149394	74151822	VISTA_enhancer_positive_mm1630	2428	2428	2428	1	1
NC_000067.7	74149394	74151822	RefSeqFE_enhancer_GeneID:114827884	NC_000067.7	74150196	74150397	ENCODEcCRE_EM10E0441477_distal_enhancer	201	2428	201	0.0827842	1
NC_000067.7	74149394	74151822	RefSeqFE_enhancer_GeneID:114827884	NC_000067.7	74150366	74150815	FANTOM5_enhancer_mm10.chr1:74111207-74111656	449	2428	449	0.184926	1
NC_000067.7	74149394	74151822	RefSeqFE_enhancer_GeneID:114827884	NC_000067.7	74150461	74150809	ENCODEcCRE_EM10E0441478_distal_enhancer	348	2428	348	0.143328	1
NC_000067.7	74149394	74151822	RefSeqFE_enhancer_GeneID:114827884	NC_000067.7	74150862	74151029	ENCODEcCRE_EM10E0441479_distal_enhancer	167	2428	167	0.0687809	1
NC_000067.7	74854222	74857466	RefSeqFE_enhancer_GeneID:110120417	NC_000067.7	74854000	74854400	Ensembl104_CTCF_binding_site:ENSMUSR00000297621	178	3244	400	0.0548705	0.445
NC_000067.7	74854222	74857466	RefSeqFE_enhancer_GeneID:110120417	NC_000067.7	74854084	74854354	ENCODEcCRE_EM10E0441831_CTCF-only	132	3244	270	0.0406905	0.488889
NC_000067.7	74854222	74857466	RefSeqFE_enhancer_GeneID:110120417	NC_000067.7	74854222	74857466	VISTA_enhancer_positive_mm1017	3244	3244	3244	1	1
NC_000067.7	74854222	74857466	RefSeqFE_enhancer_GeneID:110120417	NC_000067.7	74854224	74854405	Ensembl104_open_chromatin_region:ENSMUSR00000768073	181	3244	181	0.0557953	1
NC_000067.7	74854222	74857466	RefSeqFE_enhancer_GeneID:110120417	NC_000067.7	74855200	74855600	Ensembl104_CTCF_binding_site:ENSMUSR00000482699	400	3244	400	0.123305	1
NC_000067.7	74854222	74857466	RefSeqFE_enhancer_GeneID:110120417	NC_000067.7	74855789	74855992	ENCODEcCRE_EM10E0441832_distal_enhancer	203	3244	203	0.0625771	1
NC_000067.7	74854222	74857466	RefSeqFE_enhancer_GeneID:110120417	NC_000067.7	74855996	74856323	ENCODEcCRE_EM10E0441833_distal_enhancer	327	3244	327	0.100801	1
NC_000067.7	74854222	74857466	RefSeqFE_enhancer_GeneID:110120417	NC_000067.7	74856409	74856622	ENCODEcCRE_EM10E0441834_distal_enhancer	213	3244	213	0.0656597	1
NC_000067.7	74854222	74857466	RefSeqFE_enhancer_GeneID:110120417	NC_000067.7	74815119	74856829	dbSUPER_Transit-amplifying_cells_mSE_02993	2607	3244	41710	0.803637	0.062503
NC_000067.7	75264930	75267816	RefSeqFE_enhancer_GeneID:109280123	NC_000067.7	75264930	75267816	VISTA_enhancer_positive_mm1372	2886	2886	2886	1	1
NC_000067.7	75264930	75267816	RefSeqFE_enhancer_GeneID:109280123	NC_000067.7	75266051	75266398	ENCODEcCRE_EM10E0442058_distal_enhancer	347	2886	347	0.120236	1
NC_000067.7	75264930	75267816	RefSeqFE_enhancer_GeneID:109280123	NC_000067.7	75266166	75266352	FANTOM5_enhancer_mm10.chr1:75289522-75289708	186	2886	186	0.0644491	1
NC_000067.7	75264930	75267816	RefSeqFE_enhancer_GeneID:109280123	NC_000067.7	75267200	75267800	Ensembl104_CTCF_binding_site:ENSMUSR00000297682	600	2886	600	0.2079	1
NC_000067.7	75264930	75267816	RefSeqFE_enhancer_GeneID:109280123	NC_000067.7	75267333	75267520	ENCODEcCRE_EM10E0442060_distal_enhancer	187	2886	187	0.0647956	1
NC_000067.7	75264930	75267816	RefSeqFE_enhancer_GeneID:109280123	NC_000067.7	75264601	75268199	Ensembl104_promoter_flanking_region:ENSMUSR00000768106	2886	2886	3598	1	0.802112
NC_000067.7	75316101	75316513	RefSeqFE_conserved_region_GeneID:107075095	NC_000067.7	75315980	75316230	ENCODEcCRE_EM10E0442073_distal_enhancer	129	412	250	0.313107	0.516
NC_000067.7	75319673	75319732	RefSeqFE_conserved_region_GeneID:107075095	NC_000067.7	75319400	75320000	Ensembl104_CTCF_binding_site:ENSMUSR00000297685	59	59	600	1	0.0983333
NC_000067.7	75319673	75319732	RefSeqFE_conserved_region_GeneID:107075095	NC_000067.7	75319540	75319846	ENCODEcCRE_EM10E0442075_CTCF-only	59	59	306	1	0.19281
NC_000067.7	75319759	75319820	RefSeqFE_conserved_region_GeneID:107075095	NC_000067.7	75319400	75320000	Ensembl104_CTCF_binding_site:ENSMUSR00000297685	61	61	600	1	0.101667
NC_000067.7	75319759	75319820	RefSeqFE_conserved_region_GeneID:107075095	NC_000067.7	75319540	75319846	ENCODEcCRE_EM10E0442075_CTCF-only	61	61	306	1	0.199346
NC_000067.7	75320974	75321084	RefSeqFE_conserved_region_GeneID:107075095	NC_000067.7	75320947	75321291	ENCODEcCRE_EM10E0442077_distal_enhancer	110	110	344	1	0.319767
NC_000067.7	75321474	75321515	RefSeqFE_conserved_region_GeneID:107075095	NC_000067.7	75321389	75321536	FANTOM5_enhancer_mm10.chr1:75344745-75344892	41	41	147	1	0.278912
NC_000067.7	75321474	75321515	RefSeqFE_conserved_region_GeneID:107075095	NC_000067.7	75321434	75321635	ENCODEcCRE_EM10E0442078_distal_enhancer	41	41	201	1	0.20398
NC_000067.7	75321856	75321888	RefSeqFE_conserved_region_GeneID:107075095	NC_000067.7	75321733	75321951	ENCODEcCRE_EM10E0442079_distal_enhancer	32	32	218	1	0.146789
NC_000067.7	75321856	75321888	RefSeqFE_conserved_region_GeneID:107075095	NC_000067.7	75321800	75322000	Ensembl104_CTCF_binding_site:ENSMUSR00000482783	32	32	200	1	0.16
NC_000067.7	75324061	75324250	RefSeqFE_conserved_region_GeneID:107075095	NC_000067.7	75324022	75324178	ENCODEcCRE_EM10E0442081_distal_enhancer	117	189	156	0.619048	0.75
NC_000067.7	75324061	75324250	RefSeqFE_conserved_region_GeneID:107075095	NC_000067.7	75323535	75378173	dbSUPER_Heart_mSE_06697	189	189	54638	1	0.00345913
NC_000067.7	75325697	75325740	RefSeqFE_conserved_region_GeneID:107075095	NC_000067.7	75323535	75378173	dbSUPER_Heart_mSE_06697	43	43	54638	1	0.000786998
NC_000067.7	75325969	75326028	RefSeqFE_conserved_region_GeneID:107075095	NC_000067.7	75326005	75326343	ENCODEcCRE_EM10E0442083_distal_enhancer	23	59	338	0.389831	0.0680473
NC_000067.7	75325969	75326028	RefSeqFE_conserved_region_GeneID:107075095	NC_000067.7	75323535	75378173	dbSUPER_Heart_mSE_06697	59	59	54638	1	0.00107983
NC_000067.7	75326054	75326104	RefSeqFE_conserved_region_GeneID:107075095	NC_000067.7	75326005	75326343	ENCODEcCRE_EM10E0442083_distal_enhancer	50	50	338	1	0.147929
NC_000067.7	75326054	75326104	RefSeqFE_conserved_region_GeneID:107075095	NC_000067.7	75323535	75378173	dbSUPER_Heart_mSE_06697	50	50	54638	1	0.000915114
NC_000067.7	75332935	75332963	RefSeqFE_protein_binding_site_POU_class_homeobox_family_member(s)_GeneID:107075095	NC_000067.7	75323535	75378173	dbSUPER_Heart_mSE_06697	28	28	54638	1	0.000512464
NC_000067.7	75332938	75334462	RefSeqFE_enhancer_GeneID:107075095	NC_000067.7	75333966	75334297	ENCODEcCRE_EM10E0442084_distal_enhancer	331	1524	331	0.217192	1
NC_000067.7	75332938	75334462	RefSeqFE_enhancer_GeneID:107075095	NC_000067.7	75323535	75378173	dbSUPER_Heart_mSE_06697	1524	1524	54638	1	0.0278927
NC_000067.7	75332938	75337047	RefSeqFE_transcriptional_cis_regulatory_region_GeneID:107075095	NC_000067.7	75333966	75334297	ENCODEcCRE_EM10E0442084_distal_enhancer	331	4109	331	0.0805549	1
NC_000067.7	75332938	75337047	RefSeqFE_transcriptional_cis_regulatory_region_GeneID:107075095	NC_000067.7	75336047	75336252	ENCODEcCRE_EM10E0442087_proximal_enhancer	205	4109	205	0.0498905	1
NC_000067.7	75332938	75337047	RefSeqFE_transcriptional_cis_regulatory_region_GeneID:107075095	NC_000067.7	75336399	75339401	Ensembl104_promoter:ENSMUSR00000482784	648	4109	3002	0.157703	0.215856
NC_000067.7	75332938	75337047	RefSeqFE_transcriptional_cis_regulatory_region_GeneID:107075095	NC_000067.7	75336735	75337036	ENCODEcCRE_EM10E0442088_promoter	301	4109	301	0.0732538	1
NC_000067.7	75332938	75337047	RefSeqFE_transcriptional_cis_regulatory_region_GeneID:107075095	NC_000067.7	75323535	75378173	dbSUPER_Heart_mSE_06697	4109	4109	54638	1	0.0752041
NC_000067.7	75332938	75337584	RefSeqFE_transcriptional_cis_regulatory_region_GeneID:107075095	NC_000067.7	75333966	75334297	ENCODEcCRE_EM10E0442084_distal_enhancer	331	4646	331	0.0712441	1
NC_000067.7	75332938	75337584	RefSeqFE_transcriptional_cis_regulatory_region_GeneID:107075095	NC_000067.7	75336047	75336252	ENCODEcCRE_EM10E0442087_proximal_enhancer	205	4646	205	0.044124	1
NC_000067.7	75332938	75337584	RefSeqFE_transcriptional_cis_regulatory_region_GeneID:107075095	NC_000067.7	75336399	75339401	Ensembl104_promoter:ENSMUSR00000482784	1185	4646	3002	0.255058	0.394737
NC_000067.7	75332938	75337584	RefSeqFE_transcriptional_cis_regulatory_region_GeneID:107075095	NC_000067.7	75336735	75337036	ENCODEcCRE_EM10E0442088_promoter	301	4646	301	0.0647869	1
NC_000067.7	75332938	75337584	RefSeqFE_transcriptional_cis_regulatory_region_GeneID:107075095	NC_000067.7	75337051	75337241	ENCODEcCRE_EM10E0442089_promoter	190	4646	190	0.0408954	1
NC_000067.7	75332938	75337584	RefSeqFE_transcriptional_cis_regulatory_region_GeneID:107075095	NC_000067.7	75337293	75337587	ENCODEcCRE_EM10E0442090_proximal_enhancer	291	4646	294	0.0626345	0.989796
NC_000067.7	75332938	75337584	RefSeqFE_transcriptional_cis_regulatory_region_GeneID:107075095	NC_000067.7	75323535	75378173	dbSUPER_Heart_mSE_06697	4646	4646	54638	1	0.0850324
NC_000067.7	75333248	75333276	RefSeqFE_protein_binding_site_POU_class_homeobox_family_member(s)_GeneID:107075095	NC_000067.7	75323535	75378173	dbSUPER_Heart_mSE_06697	28	28	54638	1	0.000512464
NC_000067.7	75333248	75333276	RefSeqFE_protein_binding_site_serum_response_factor_GeneID:107075095	NC_000067.7	75323535	75378173	dbSUPER_Heart_mSE_06697	28	28	54638	1	0.000512464
NC_000067.7	75335998	75336398	RefSeqFE_enhancer_GeneID:107075095	NC_000067.7	75336047	75336252	ENCODEcCRE_EM10E0442087_proximal_enhancer	205	400	205	0.5125	1
NC_000067.7	75335998	75336398	RefSeqFE_enhancer_GeneID:107075095	NC_000067.7	75323535	75378173	dbSUPER_Heart_mSE_06697	400	400	54638	1	0.00732091
NC_000067.7	75335999	75337168	RefSeqFE_transcriptional_cis_regulatory_region_GeneID:107075095	NC_000067.7	75336047	75336252	ENCODEcCRE_EM10E0442087_proximal_enhancer	205	1169	205	0.175364	1
NC_000067.7	75335999	75337168	RefSeqFE_transcriptional_cis_regulatory_region_GeneID:107075095	NC_000067.7	75336399	75339401	Ensembl104_promoter:ENSMUSR00000482784	769	1169	3002	0.657827	0.256163
NC_000067.7	75335999	75337168	RefSeqFE_transcriptional_cis_regulatory_region_GeneID:107075095	NC_000067.7	75336735	75337036	ENCODEcCRE_EM10E0442088_promoter	301	1169	301	0.257485	1
NC_000067.7	75335999	75337168	RefSeqFE_transcriptional_cis_regulatory_region_GeneID:107075095	NC_000067.7	75337051	75337241	ENCODEcCRE_EM10E0442089_promoter	117	1169	190	0.100086	0.615789
NC_000067.7	75335999	75337168	RefSeqFE_transcriptional_cis_regulatory_region_GeneID:107075095	NC_000067.7	75323535	75378173	dbSUPER_Heart_mSE_06697	1169	1169	54638	1	0.0213954
NC_000067.7	75336103	75336128	RefSeqFE_protein_binding_site_myocyte_enhancer_factor_2_GeneID:107075095	NC_000067.7	75336047	75336252	ENCODEcCRE_EM10E0442087_proximal_enhancer	25	25	205	1	0.121951
NC_000067.7	75336103	75336128	RefSeqFE_protein_binding_site_myocyte_enhancer_factor_2_GeneID:107075095	NC_000067.7	75323535	75378173	dbSUPER_Heart_mSE_06697	25	25	54638	1	0.000457557
NC_000067.7	75336138	75336154	RefSeqFE_protein_binding_site_myogenic_differentiation_1_GeneID:107075095	NC_000067.7	75336047	75336252	ENCODEcCRE_EM10E0442087_proximal_enhancer	16	16	205	1	0.0780488
NC_000067.7	75336138	75336154	RefSeqFE_protein_binding_site_myogenic_differentiation_1_GeneID:107075095	NC_000067.7	75323535	75378173	dbSUPER_Heart_mSE_06697	16	16	54638	1	0.000292836
NC_000067.7	75336138	75336154	RefSeqFE_protein_binding_site_myogenin_(myogenic_factor_4)_GeneID:107075095	NC_000067.7	75336047	75336252	ENCODEcCRE_EM10E0442087_proximal_enhancer	16	16	205	1	0.0780488
NC_000067.7	75336138	75336154	RefSeqFE_protein_binding_site_myogenin_(myogenic_factor_4)_GeneID:107075095	NC_000067.7	75323535	75378173	dbSUPER_Heart_mSE_06697	16	16	54638	1	0.000292836
NC_000067.7	75336397	75336443	RefSeqFE_silencer_GeneID:107075095	NC_000067.7	75336399	75339401	Ensembl104_promoter:ENSMUSR00000482784	44	46	3002	0.956522	0.0146569
NC_000067.7	75336397	75336443	RefSeqFE_silencer_GeneID:107075095	NC_000067.7	75323535	75378173	dbSUPER_Heart_mSE_06697	46	46	54638	1	0.000841905
NC_000067.7	75336442	75336609	RefSeqFE_transcriptional_cis_regulatory_region_GeneID:107075095	NC_000067.7	75336399	75339401	Ensembl104_promoter:ENSMUSR00000482784	167	167	3002	1	0.0556296
NC_000067.7	75336442	75336609	RefSeqFE_transcriptional_cis_regulatory_region_GeneID:107075095	NC_000067.7	75323535	75378173	dbSUPER_Heart_mSE_06697	167	167	54638	1	0.00305648
NC_000067.7	75336609	75336897	RefSeqFE_silencer_GeneID:107075095	NC_000067.7	75336399	75339401	Ensembl104_promoter:ENSMUSR00000482784	288	288	3002	1	0.095936
NC_000067.7	75336609	75336897	RefSeqFE_silencer_GeneID:107075095	NC_000067.7	75336735	75337036	ENCODEcCRE_EM10E0442088_promoter	162	288	301	0.5625	0.538206
NC_000067.7	75336609	75336897	RefSeqFE_silencer_GeneID:107075095	NC_000067.7	75323535	75378173	dbSUPER_Heart_mSE_06697	288	288	54638	1	0.00527106
NC_000067.7	75336891	75336911	RefSeqFE_protein_binding_site_myogenic_differentiation_1_GeneID:107075095	NC_000067.7	75336399	75339401	Ensembl104_promoter:ENSMUSR00000482784	20	20	3002	1	0.00666223
NC_000067.7	75336891	75336911	RefSeqFE_protein_binding_site_myogenic_differentiation_1_GeneID:107075095	NC_000067.7	75336735	75337036	ENCODEcCRE_EM10E0442088_promoter	20	20	301	1	0.0664452
NC_000067.7	75336891	75336911	RefSeqFE_protein_binding_site_myogenic_differentiation_1_GeneID:107075095	NC_000067.7	75323535	75378173	dbSUPER_Heart_mSE_06697	20	20	54638	1	0.000366046
NC_000067.7	75336891	75336911	RefSeqFE_protein_binding_site_myogenin_(myogenic_factor_4)_GeneID:107075095	NC_000067.7	75336399	75339401	Ensembl104_promoter:ENSMUSR00000482784	20	20	3002	1	0.00666223
NC_000067.7	75336891	75336911	RefSeqFE_protein_binding_site_myogenin_(myogenic_factor_4)_GeneID:107075095	NC_000067.7	75336735	75337036	ENCODEcCRE_EM10E0442088_promoter	20	20	301	1	0.0664452
NC_000067.7	75336891	75336911	RefSeqFE_protein_binding_site_myogenin_(myogenic_factor_4)_GeneID:107075095	NC_000067.7	75323535	75378173	dbSUPER_Heart_mSE_06697	20	20	54638	1	0.000366046
NC_000067.7	75336897	75336978	RefSeqFE_promoter_GeneID:107075095	NC_000067.7	75336399	75339401	Ensembl104_promoter:ENSMUSR00000482784	81	81	3002	1	0.026982
NC_000067.7	75336897	75336978	RefSeqFE_promoter_GeneID:107075095	NC_000067.7	75336735	75337036	ENCODEcCRE_EM10E0442088_promoter	81	81	301	1	0.269103
NC_000067.7	75336897	75336978	RefSeqFE_promoter_GeneID:107075095	NC_000067.7	75323535	75378173	dbSUPER_Heart_mSE_06697	81	81	54638	1	0.00148248
NC_000067.7	75336942	75336948	RefSeqFE_TATA_box_GeneID:107075095	NC_000067.7	75336399	75339401	Ensembl104_promoter:ENSMUSR00000482784	6	6	3002	1	0.00199867
NC_000067.7	75336942	75336948	RefSeqFE_TATA_box_GeneID:107075095	NC_000067.7	75336735	75337036	ENCODEcCRE_EM10E0442088_promoter	6	6	301	1	0.0199336
NC_000067.7	75336942	75336948	RefSeqFE_TATA_box_GeneID:107075095	NC_000067.7	75323535	75378173	dbSUPER_Heart_mSE_06697	6	6	54638	1	0.000109814
NC_000067.7	75637396	75639898	RefSeqFE_enhancer_GeneID:110120420	NC_000067.7	75637356	75637628	ENCODEcCRE_EM10E0442285_distal_enhancer	232	2502	272	0.0927258	0.852941
NC_000067.7	75637396	75639898	RefSeqFE_enhancer_GeneID:110120420	NC_000067.7	75637396	75639898	VISTA_enhancer_positive_mm1045	2502	2502	2502	1	1
NC_000067.7	75637396	75639898	RefSeqFE_enhancer_GeneID:110120420	NC_000067.7	75638929	75639219	ENCODEcCRE_EM10E0442286_distal_enhancer	290	2502	290	0.115907	1
NC_000067.7	75637396	75639898	RefSeqFE_enhancer_GeneID:110120420	NC_000067.7	75639328	75639640	ENCODEcCRE_EM10E0442287_distal_enhancer	312	2502	312	0.1247	1
NC_000067.7	75761004	75764082	RefSeqFE_enhancer_GeneID:110120418	NC_000067.7	75761004	75764082	VISTA_enhancer_positive_mm1036	3078	3078	3078	1	1
NC_000067.7	75761004	75764082	RefSeqFE_enhancer_GeneID:110120418	NC_000067.7	75762000	75764400	Ensembl104_enhancer:ENSMUSR00000768153	2082	3078	2400	0.676413	0.8675
NC_000067.7	75761004	75764082	RefSeqFE_enhancer_GeneID:110120418	NC_000067.7	75763090	75763422	ENCODEcCRE_EM10E0442302_distal_enhancer	332	3078	332	0.107862	1
NC_000067.7	75777534	75781974	RefSeqFE_enhancer_GeneID:110120419	NC_000067.7	75777534	75781974	VISTA_enhancer_positive_mm1042	4440	4440	4440	1	1
NC_000067.7	75777534	75781974	RefSeqFE_enhancer_GeneID:110120419	NC_000067.7	75779000	75779400	Ensembl104_enhancer:ENSMUSR00000768155	400	4440	400	0.0900901	1
NC_000067.7	75777534	75781974	RefSeqFE_enhancer_GeneID:110120419	NC_000067.7	75779600	75779800	Ensembl104_enhancer:ENSMUSR00000768156	200	4440	200	0.045045	1
NC_000067.7	75777534	75781974	RefSeqFE_enhancer_GeneID:110120419	NC_000067.7	75780000	75782200	Ensembl104_enhancer:ENSMUSR00000482885	1974	4440	2200	0.444595	0.897273
NC_000067.7	75859313	75863124	RefSeqFE_enhancer_GeneID:110120421	NC_000067.7	75859313	75863124	VISTA_enhancer_positive_mm1046	3811	3811	3811	1	1
NC_000067.7	75859313	75863124	RefSeqFE_enhancer_GeneID:110120421	NC_000067.7	75862200	75862600	Ensembl104_promoter_flanking_region:ENSMUSR00000482901	400	3811	400	0.104959	1
NC_000067.7	77498536	77499012	RefSeqFE_enhancer_GeneID:109279844	NC_000067.7	77498557	77498770	ENCODEcCRE_EM10E0442508_distal_enhancer	213	476	213	0.447479	1
NC_000067.7	77498536	77499012	RefSeqFE_enhancer_GeneID:109279844	NC_000067.7	77498898	77499199	ENCODEcCRE_EM10E0442509_distal_enhancer	114	476	301	0.239496	0.378738
NC_000067.7	77498614	77498623	RefSeqFE_protein_binding_site_early_growth_response_2_GeneID:109279844	NC_000067.7	77498557	77498770	ENCODEcCRE_EM10E0442508_distal_enhancer	9	9	213	1	0.0422535
NC_000067.7	77498735	77498744	RefSeqFE_protein_binding_site_early_growth_response_2_GeneID:109279844	NC_000067.7	77498557	77498770	ENCODEcCRE_EM10E0442508_distal_enhancer	9	9	213	1	0.0422535
NC_000067.7	77498939	77498948	RefSeqFE_protein_binding_site_early_growth_response_2_GeneID:109279844	NC_000067.7	77498898	77499199	ENCODEcCRE_EM10E0442509_distal_enhancer	9	9	301	1	0.0299003
NC_000067.7	78036039	78038144	RefSeqFE_enhancer_GeneID:110120423	NC_000067.7	78036776	78036949	ENCODEcCRE_EM10E0442564_distal_enhancer	173	2105	173	0.0821853	1
NC_000067.7	78036039	78038144	RefSeqFE_enhancer_GeneID:110120423	NC_000067.7	78037003	78037241	ENCODEcCRE_EM10E0442565_distal_enhancer	238	2105	238	0.113064	1
NC_000067.7	78036039	78038144	RefSeqFE_enhancer_GeneID:110120423	NC_000067.7	78037540	78037890	ENCODEcCRE_EM10E0442566_distal_enhancer	350	2105	350	0.166271	1
NC_000067.7	78036039	78038144	RefSeqFE_enhancer_GeneID:110120423	NC_000067.7	78036039	78038144	VISTA_enhancer_positive_mm1092	2105	2105	2105	1	1
NC_000067.7	78144071	78145031	RefSeqFE_enhancer_GeneID:107980444	NC_000067.7	78144266	78144585	ENCODEcCRE_EM10E0442579_distal_enhancer	319	960	319	0.332292	1
NC_000067.7	78144071	78145031	RefSeqFE_enhancer_GeneID:107980444	NC_000067.7	78144595	78144940	ENCODEcCRE_EM10E0442580_distal_enhancer	345	960	345	0.359375	1
NC_000067.7	78173336	78175327	RefSeqFE_promoter_GeneID:107980439	NC_000067.7	78173488	78173664	ENCODEcCRE_EM10E0442617_promoter	176	1991	176	0.0883978	1
NC_000067.7	78173336	78175327	RefSeqFE_promoter_GeneID:107980439	NC_000067.7	78173688	78173983	ENCODEcCRE_EM10E0442618_promoter	295	1991	295	0.148167	1
NC_000067.7	78173336	78175327	RefSeqFE_promoter_GeneID:107980439	NC_000067.7	78174117	78174300	ENCODEcCRE_EM10E0442619_proximal_enhancer	183	1991	183	0.0919136	1
NC_000067.7	78173336	78175327	RefSeqFE_promoter_GeneID:107980439	NC_000067.7	78174316	78174612	ENCODEcCRE_EM10E0442620_proximal_enhancer	296	1991	296	0.148669	1
NC_000067.7	78173336	78175327	RefSeqFE_promoter_GeneID:107980439	NC_000067.7	78174652	78174934	ENCODEcCRE_EM10E0442621_proximal_enhancer	282	1991	282	0.141637	1
NC_000067.7	78173336	78175327	RefSeqFE_promoter_GeneID:107980439	NC_000067.7	78175023	78175366	ENCODEcCRE_EM10E0442622_proximal_enhancer	304	1991	343	0.152687	0.886297
NC_000067.7	78173336	78175327	RefSeqFE_promoter_GeneID:107980439	NC_000067.7	78163599	78176401	Ensembl104_promoter:ENSMUSR00000483152	1991	1991	12802	1	0.155523
NC_000067.7	78173766	78173781	RefSeqFE_TATA_box_GeneID:107980439	NC_000067.7	78173688	78173983	ENCODEcCRE_EM10E0442618_promoter	15	15	295	1	0.0508475
NC_000067.7	78173766	78173781	RefSeqFE_TATA_box_GeneID:107980439	NC_000067.7	78163599	78176401	Ensembl104_promoter:ENSMUSR00000483152	15	15	12802	1	0.00117169
NC_000067.7	78174491	78174724	RefSeqFE_transcriptional_cis_regulatory_region_GeneID:107980439	NC_000067.7	78174316	78174612	ENCODEcCRE_EM10E0442620_proximal_enhancer	121	233	296	0.519313	0.408784
NC_000067.7	78174491	78174724	RefSeqFE_transcriptional_cis_regulatory_region_GeneID:107980439	NC_000067.7	78174652	78174934	ENCODEcCRE_EM10E0442621_proximal_enhancer	72	233	282	0.309013	0.255319
NC_000067.7	78174491	78174724	RefSeqFE_transcriptional_cis_regulatory_region_GeneID:107980439	NC_000067.7	78163599	78176401	Ensembl104_promoter:ENSMUSR00000483152	233	233	12802	1	0.0182003
NC_000067.7	78174491	78175102	RefSeqFE_enhancer_GeneID:107980439	NC_000067.7	78174316	78174612	ENCODEcCRE_EM10E0442620_proximal_enhancer	121	611	296	0.198036	0.408784
NC_000067.7	78174491	78175102	RefSeqFE_enhancer_GeneID:107980439	NC_000067.7	78174652	78174934	ENCODEcCRE_EM10E0442621_proximal_enhancer	282	611	282	0.461538	1
NC_000067.7	78174491	78175102	RefSeqFE_enhancer_GeneID:107980439	NC_000067.7	78175023	78175366	ENCODEcCRE_EM10E0442622_proximal_enhancer	79	611	343	0.129296	0.230321
NC_000067.7	78174491	78175102	RefSeqFE_enhancer_GeneID:107980439	NC_000067.7	78163599	78176401	Ensembl104_promoter:ENSMUSR00000483152	611	611	12802	1	0.0477269
NC_000067.7	78174513	78174539	RefSeqFE_protein_binding_site_TEA_domain_transcription_factor_2_GeneID:107980439	NC_000067.7	78174316	78174612	ENCODEcCRE_EM10E0442620_proximal_enhancer	26	26	296	1	0.0878378
NC_000067.7	78174513	78174539	RefSeqFE_protein_binding_site_TEA_domain_transcription_factor_2_GeneID:107980439	NC_000067.7	78163599	78176401	Ensembl104_promoter:ENSMUSR00000483152	26	26	12802	1	0.00203093
NC_000067.7	78174583	78174623	RefSeqFE_protein_binding_site_caudal_type_homeobox_1_GeneID:107980439	NC_000067.7	78174316	78174612	ENCODEcCRE_EM10E0442620_proximal_enhancer	29	40	296	0.725	0.097973
NC_000067.7	78174583	78174623	RefSeqFE_protein_binding_site_caudal_type_homeobox_1_GeneID:107980439	NC_000067.7	78163599	78176401	Ensembl104_promoter:ENSMUSR00000483152	40	40	12802	1	0.00312451
NC_000067.7	78174587	78174607	RefSeqFE_protein_binding_site_POU_class_2_homeobox_1_GeneID:107980439	NC_000067.7	78174316	78174612	ENCODEcCRE_EM10E0442620_proximal_enhancer	20	20	296	1	0.0675676
NC_000067.7	78174587	78174607	RefSeqFE_protein_binding_site_POU_class_2_homeobox_1_GeneID:107980439	NC_000067.7	78163599	78176401	Ensembl104_promoter:ENSMUSR00000483152	20	20	12802	1	0.00156226
NC_000067.7	78174587	78174607	RefSeqFE_protein_binding_site_POU_class_3_homeobox_2_GeneID:107980439	NC_000067.7	78174316	78174612	ENCODEcCRE_EM10E0442620_proximal_enhancer	20	20	296	1	0.0675676
NC_000067.7	78174587	78174607	RefSeqFE_protein_binding_site_POU_class_3_homeobox_2_GeneID:107980439	NC_000067.7	78163599	78176401	Ensembl104_promoter:ENSMUSR00000483152	20	20	12802	1	0.00156226
NC_000067.7	78174587	78174607	RefSeqFE_protein_binding_site_POU_class_3_homeobox_3_GeneID:107980439	NC_000067.7	78174316	78174612	ENCODEcCRE_EM10E0442620_proximal_enhancer	20	20	296	1	0.0675676
NC_000067.7	78174587	78174607	RefSeqFE_protein_binding_site_POU_class_3_homeobox_3_GeneID:107980439	NC_000067.7	78163599	78176401	Ensembl104_promoter:ENSMUSR00000483152	20	20	12802	1	0.00156226
NC_000067.7	78174612	78174648	RefSeqFE_protein_binding_site_forkhead_box_D3_GeneID:107980439	NC_000067.7	78163599	78176401	Ensembl104_promoter:ENSMUSR00000483152	36	36	12802	1	0.00281206
NC_000067.7	78174613	78174653	RefSeqFE_protein_binding_site_caudal_type_homeobox_1_GeneID:107980439	NC_000067.7	78174652	78174934	ENCODEcCRE_EM10E0442621_proximal_enhancer	1	40	282	0.025	0.0035461
NC_000067.7	78174613	78174653	RefSeqFE_protein_binding_site_caudal_type_homeobox_1_GeneID:107980439	NC_000067.7	78163599	78176401	Ensembl104_promoter:ENSMUSR00000483152	40	40	12802	1	0.00312451
NC_000067.7	78174643	78174683	RefSeqFE_protein_binding_site_Zic_family_member_2_GeneID:107980439	NC_000067.7	78174652	78174934	ENCODEcCRE_EM10E0442621_proximal_enhancer	31	40	282	0.775	0.109929
NC_000067.7	78174643	78174683	RefSeqFE_protein_binding_site_Zic_family_member_2_GeneID:107980439	NC_000067.7	78163599	78176401	Ensembl104_promoter:ENSMUSR00000483152	40	40	12802	1	0.00312451
NC_000067.7	78174673	78174713	RefSeqFE_protein_binding_site_caudal_type_homeobox_1_GeneID:107980439	NC_000067.7	78174652	78174934	ENCODEcCRE_EM10E0442621_proximal_enhancer	40	40	282	1	0.141844
NC_000067.7	78174673	78174713	RefSeqFE_protein_binding_site_caudal_type_homeobox_1_GeneID:107980439	NC_000067.7	78163599	78176401	Ensembl104_promoter:ENSMUSR00000483152	40	40	12802	1	0.00312451
NC_000067.7	78174879	78174896	RefSeqFE_protein_binding_site_Meis_homeobox_1_GeneID:107980439	NC_000067.7	78174652	78174934	ENCODEcCRE_EM10E0442621_proximal_enhancer	17	17	282	1	0.0602837
NC_000067.7	78174879	78174896	RefSeqFE_protein_binding_site_Meis_homeobox_1_GeneID:107980439	NC_000067.7	78163599	78176401	Ensembl104_promoter:ENSMUSR00000483152	17	17	12802	1	0.00132792
NC_000067.7	78174879	78174896	RefSeqFE_protein_binding_site_Meis_homeobox_2_GeneID:107980439	NC_000067.7	78174652	78174934	ENCODEcCRE_EM10E0442621_proximal_enhancer	17	17	282	1	0.0602837
NC_000067.7	78174879	78174896	RefSeqFE_protein_binding_site_Meis_homeobox_2_GeneID:107980439	NC_000067.7	78163599	78176401	Ensembl104_promoter:ENSMUSR00000483152	17	17	12802	1	0.00132792
NC_000067.7	78174879	78174896	RefSeqFE_protein_binding_site_PBX/knotted_1_homeobox_1_GeneID:107980439	NC_000067.7	78174652	78174934	ENCODEcCRE_EM10E0442621_proximal_enhancer	17	17	282	1	0.0602837
NC_000067.7	78174879	78174896	RefSeqFE_protein_binding_site_PBX/knotted_1_homeobox_1_GeneID:107980439	NC_000067.7	78163599	78176401	Ensembl104_promoter:ENSMUSR00000483152	17	17	12802	1	0.00132792
NC_000067.7	78174879	78174896	RefSeqFE_protein_binding_site_PBX_homeobox_GeneID:107980439	NC_000067.7	78174652	78174934	ENCODEcCRE_EM10E0442621_proximal_enhancer	17	17	282	1	0.0602837
NC_000067.7	78174879	78174896	RefSeqFE_protein_binding_site_PBX_homeobox_GeneID:107980439	NC_000067.7	78163599	78176401	Ensembl104_promoter:ENSMUSR00000483152	17	17	12802	1	0.00132792
NC_000067.7	78174879	78174896	RefSeqFE_protein_binding_site_homeobox_B4_GeneID:107980439	NC_000067.7	78174652	78174934	ENCODEcCRE_EM10E0442621_proximal_enhancer	17	17	282	1	0.0602837
NC_000067.7	78174879	78174896	RefSeqFE_protein_binding_site_homeobox_B4_GeneID:107980439	NC_000067.7	78163599	78176401	Ensembl104_promoter:ENSMUSR00000483152	17	17	12802	1	0.00132792
NC_000067.7	78174879	78175102	RefSeqFE_transcriptional_cis_regulatory_region_GeneID:107980439	NC_000067.7	78174652	78174934	ENCODEcCRE_EM10E0442621_proximal_enhancer	55	223	282	0.246637	0.195035
NC_000067.7	78174879	78175102	RefSeqFE_transcriptional_cis_regulatory_region_GeneID:107980439	NC_000067.7	78175023	78175366	ENCODEcCRE_EM10E0442622_proximal_enhancer	79	223	343	0.35426	0.230321
NC_000067.7	78174879	78175102	RefSeqFE_transcriptional_cis_regulatory_region_GeneID:107980439	NC_000067.7	78163599	78176401	Ensembl104_promoter:ENSMUSR00000483152	223	223	12802	1	0.0174192
NC_000067.7	78174918	78174951	RefSeqFE_protein_binding_site_forkhead_box_D3_GeneID:107980439	NC_000067.7	78174652	78174934	ENCODEcCRE_EM10E0442621_proximal_enhancer	16	33	282	0.484848	0.0567376
NC_000067.7	78174918	78174951	RefSeqFE_protein_binding_site_forkhead_box_D3_GeneID:107980439	NC_000067.7	78163599	78176401	Ensembl104_promoter:ENSMUSR00000483152	33	33	12802	1	0.00257772
NC_000067.7	78175042	78175061	RefSeqFE_protein_binding_site_Meis_homeobox_1_GeneID:107980439	NC_000067.7	78175023	78175366	ENCODEcCRE_EM10E0442622_proximal_enhancer	19	19	343	1	0.0553936
NC_000067.7	78175042	78175061	RefSeqFE_protein_binding_site_Meis_homeobox_1_GeneID:107980439	NC_000067.7	78163599	78176401	Ensembl104_promoter:ENSMUSR00000483152	19	19	12802	1	0.00148414
NC_000067.7	78175042	78175061	RefSeqFE_protein_binding_site_Meis_homeobox_2_GeneID:107980439	NC_000067.7	78175023	78175366	ENCODEcCRE_EM10E0442622_proximal_enhancer	19	19	343	1	0.0553936
NC_000067.7	78175042	78175061	RefSeqFE_protein_binding_site_Meis_homeobox_2_GeneID:107980439	NC_000067.7	78163599	78176401	Ensembl104_promoter:ENSMUSR00000483152	19	19	12802	1	0.00148414
NC_000067.7	78175042	78175061	RefSeqFE_protein_binding_site_PBX/knotted_1_homeobox_1_GeneID:107980439	NC_000067.7	78175023	78175366	ENCODEcCRE_EM10E0442622_proximal_enhancer	19	19	343	1	0.0553936
NC_000067.7	78175042	78175061	RefSeqFE_protein_binding_site_PBX/knotted_1_homeobox_1_GeneID:107980439	NC_000067.7	78163599	78176401	Ensembl104_promoter:ENSMUSR00000483152	19	19	12802	1	0.00148414
NC_000067.7	78175042	78175061	RefSeqFE_protein_binding_site_PBX_homeobox_GeneID:107980439	NC_000067.7	78175023	78175366	ENCODEcCRE_EM10E0442622_proximal_enhancer	19	19	343	1	0.0553936
NC_000067.7	78175042	78175061	RefSeqFE_protein_binding_site_PBX_homeobox_GeneID:107980439	NC_000067.7	78163599	78176401	Ensembl104_promoter:ENSMUSR00000483152	19	19	12802	1	0.00148414
NC_000067.7	78175087	78175107	RefSeqFE_protein_binding_site_POU_class_2_homeobox_1_GeneID:107980439	NC_000067.7	78175023	78175366	ENCODEcCRE_EM10E0442622_proximal_enhancer	20	20	343	1	0.058309
NC_000067.7	78175087	78175107	RefSeqFE_protein_binding_site_POU_class_2_homeobox_1_GeneID:107980439	NC_000067.7	78163599	78176401	Ensembl104_promoter:ENSMUSR00000483152	20	20	12802	1	0.00156226
NC_000067.7	78175087	78175107	RefSeqFE_protein_binding_site_POU_class_3_homeobox_2_GeneID:107980439	NC_000067.7	78175023	78175366	ENCODEcCRE_EM10E0442622_proximal_enhancer	20	20	343	1	0.058309
NC_000067.7	78175087	78175107	RefSeqFE_protein_binding_site_POU_class_3_homeobox_2_GeneID:107980439	NC_000067.7	78163599	78176401	Ensembl104_promoter:ENSMUSR00000483152	20	20	12802	1	0.00156226
NC_000067.7	78175087	78175107	RefSeqFE_protein_binding_site_POU_class_3_homeobox_3_GeneID:107980439	NC_000067.7	78175023	78175366	ENCODEcCRE_EM10E0442622_proximal_enhancer	20	20	343	1	0.058309
NC_000067.7	78175087	78175107	RefSeqFE_protein_binding_site_POU_class_3_homeobox_3_GeneID:107980439	NC_000067.7	78163599	78176401	Ensembl104_promoter:ENSMUSR00000483152	20	20	12802	1	0.00156226
NC_000067.7	78179418	78179709	RefSeqFE_conserved_region_GeneID:107980442	NC_000067.7	78179132	78179429	ENCODEcCRE_EM10E0442632_distal_enhancer	11	291	297	0.0378007	0.037037
NC_000067.7	78179418	78179709	RefSeqFE_conserved_region_GeneID:107980442	NC_000067.7	78179199	78181001	Ensembl104_promoter:ENSMUSR00000768259	291	291	1802	1	0.161487
NC_000067.7	78179418	78179709	RefSeqFE_conserved_region_GeneID:107980442	NC_000067.7	78179446	78179596	ENCODEcCRE_EM10E0442633_distal_enhancer	150	291	150	0.515464	1
NC_000067.7	78179418	78179709	RefSeqFE_conserved_region_GeneID:107980442	NC_000067.7	78179684	78179917	ENCODEcCRE_EM10E0442634_distal_enhancer	25	291	233	0.0859107	0.107296
NC_000067.7	78179418	78179709	RefSeqFE_enhancer_GeneID:107980442	NC_000067.7	78179132	78179429	ENCODEcCRE_EM10E0442632_distal_enhancer	11	291	297	0.0378007	0.037037
NC_000067.7	78179418	78179709	RefSeqFE_enhancer_GeneID:107980442	NC_000067.7	78179199	78181001	Ensembl104_promoter:ENSMUSR00000768259	291	291	1802	1	0.161487
NC_000067.7	78179418	78179709	RefSeqFE_enhancer_GeneID:107980442	NC_000067.7	78179446	78179596	ENCODEcCRE_EM10E0442633_distal_enhancer	150	291	150	0.515464	1
NC_000067.7	78179418	78179709	RefSeqFE_enhancer_GeneID:107980442	NC_000067.7	78179684	78179917	ENCODEcCRE_EM10E0442634_distal_enhancer	25	291	233	0.0859107	0.107296
NC_000067.7	78179443	78180585	RefSeqFE_enhancer_GeneID:107980442	NC_000067.7	78179199	78181001	Ensembl104_promoter:ENSMUSR00000768259	1142	1142	1802	1	0.63374
NC_000067.7	78179443	78180585	RefSeqFE_enhancer_GeneID:107980442	NC_000067.7	78179446	78179596	ENCODEcCRE_EM10E0442633_distal_enhancer	150	1142	150	0.131349	1
NC_000067.7	78179443	78180585	RefSeqFE_enhancer_GeneID:107980442	NC_000067.7	78179684	78179917	ENCODEcCRE_EM10E0442634_distal_enhancer	233	1142	233	0.204028	1
NC_000067.7	78179443	78180585	RefSeqFE_enhancer_GeneID:107980442	NC_000067.7	78179990	78180272	ENCODEcCRE_EM10E0442635_distal_enhancer	282	1142	282	0.246935	1
NC_000067.7	78179443	78180585	RefSeqFE_enhancer_GeneID:107980442	NC_000067.7	78180383	78180647	ENCODEcCRE_EM10E0442636_distal_enhancer	202	1142	264	0.176883	0.765152
NC_000067.7	86238317	86239471	RefSeqFE_transcriptional_cis_regulatory_region_GeneID:116803643	NC_000067.7	86238355	86238635	ENCODEcCRE_EM10E0444040_distal_enhancer	280	1154	280	0.242634	1
NC_000067.7	86238317	86239471	RefSeqFE_transcriptional_cis_regulatory_region_GeneID:116803643	NC_000067.7	86238522	86239129	FANTOM5_enhancer_mm10.chr1:86310800-86311407	607	1154	607	0.525997	1
NC_000067.7	86238317	86239471	RefSeqFE_transcriptional_cis_regulatory_region_GeneID:116803643	NC_000067.7	86238736	86239082	ENCODEcCRE_EM10E0444041_distal_enhancer	346	1154	346	0.299827	1
NC_000067.7	86238317	86239471	RefSeqFE_transcriptional_cis_regulatory_region_GeneID:116803643	NC_000067.7	86239293	86239642	ENCODEcCRE_EM10E0444042_distal_enhancer	178	1154	349	0.154246	0.510029
NC_000067.7	91890649	91893682	RefSeqFE_enhancer_GeneID:109280001	NC_000067.7	91889801	91893999	Ensembl104_promoter_flanking_region:ENSMUSR00000769208	3033	3033	4198	1	0.722487
NC_000067.7	91890649	91893682	RefSeqFE_enhancer_GeneID:109280001	NC_000067.7	91890649	91893682	VISTA_enhancer_positive_mm901	3033	3033	3033	1	1
NC_000067.7	91890649	91893682	RefSeqFE_enhancer_GeneID:109280001	NC_000067.7	91891115	91891452	ENCODEcCRE_EM10E0446190_distal_enhancer	337	3033	337	0.111111	1
NC_000067.7	91890649	91893682	RefSeqFE_enhancer_GeneID:109280001	NC_000067.7	91892278	91892528	ENCODEcCRE_EM10E0446191_distal_enhancer	250	3033	250	0.0824266	1
NC_000067.7	92716823	92720644	RefSeqFE_enhancer_GeneID:110120422	NC_000067.7	92718400	92718581	ENCODEcCRE_EM10E0446452_distal_enhancer	181	3821	181	0.0473698	1
NC_000067.7	92716823	92720644	RefSeqFE_enhancer_GeneID:110120422	NC_000067.7	92718699	92718857	ENCODEcCRE_EM10E0446453_distal_enhancer	158	3821	158	0.0413504	1
NC_000067.7	92716823	92720644	RefSeqFE_enhancer_GeneID:110120422	NC_000067.7	92718981	92719331	ENCODEcCRE_EM10E0446454_distal_enhancer	350	3821	350	0.0915991	1
NC_000067.7	92716823	92720644	RefSeqFE_enhancer_GeneID:110120422	NC_000067.7	92719524	92719678	ENCODEcCRE_EM10E0446455_distal_enhancer	154	3821	154	0.0403036	1
NC_000067.7	92716823	92720644	RefSeqFE_enhancer_GeneID:110120422	NC_000067.7	92703570	92718734	dbSUPER_Myotubes_mSE_00633	1911	3821	15164	0.500131	0.126022
NC_000067.7	92716823	92720644	RefSeqFE_enhancer_GeneID:110120422	NC_000067.7	92716823	92720644	VISTA_enhancer_positive_mm1063	3821	3821	3821	1	1
NC_000067.7	97466221	97470466	RefSeqFE_enhancer_GeneID:109280106	NC_000067.7	97467961	97468132	ENCODEcCRE_EM10E0446919_distal_enhancer	171	4245	171	0.0402827	1
NC_000067.7	97466221	97470466	RefSeqFE_enhancer_GeneID:109280106	NC_000067.7	97468429	97468714	ENCODEcCRE_EM10E0446921_distal_enhancer	285	4245	285	0.0671378	1
NC_000067.7	97466221	97470466	RefSeqFE_enhancer_GeneID:109280106	NC_000067.7	97466221	97470466	VISTA_enhancer_positive_mm1317	4245	4245	4245	1	1
NC_000067.7	97466221	97470466	RefSeqFE_enhancer_GeneID:109280106	NC_000067.7	97468207	97468423	ENCODEcCRE_EM10E0446920_distal_enhancer	216	4245	216	0.0508834	1
NC_000067.7	127482101	127484616	RefSeqFE_enhancer_GeneID:110120371	NC_000067.7	127483611	127483858	ENCODEcCRE_EM10E0449201_distal_enhancer	247	2515	247	0.0982107	1
NC_000067.7	127482101	127484616	RefSeqFE_enhancer_GeneID:110120371	NC_000067.7	127483979	127484315	ENCODEcCRE_EM10E0449202_distal_enhancer	336	2515	336	0.133598	1
NC_000067.7	127482101	127484616	RefSeqFE_enhancer_GeneID:110120371	NC_000067.7	127482101	127484616	VISTA_enhancer_positive_mm790	2515	2515	2515	1	1
NC_000067.7	127482101	127484616	RefSeqFE_enhancer_GeneID:110120371	NC_000067.7	127482600	127485200	Ensembl104_enhancer:ENSMUSR00000300558	2016	2515	2600	0.80159	0.775385
NC_000067.7	132260407	132262200	RefSeqFE_enhancer_GeneID:110120368	NC_000067.7	132260407	132262200	VISTA_enhancer_positive_mm505	1793	1793	1793	1	1
NC_000067.7	132260407	132262200	RefSeqFE_enhancer_GeneID:110120368	NC_000067.7	132260999	132262201	Ensembl104_promoter:ENSMUSR00000012139	1201	1793	1202	0.669827	0.999168
NC_000067.7	132260407	132262200	RefSeqFE_enhancer_GeneID:110120368	NC_000067.7	132261464	132261813	ENCODEcCRE_EM10E0450492_distal_enhancer	349	1793	349	0.194646	1
NC_000067.7	132260407	132262200	RefSeqFE_enhancer_GeneID:110120368	NC_000067.7	132261979	132262161	ENCODEcCRE_EM10E0450493_distal_enhancer	182	1793	182	0.101506	1
NC_000067.7	132260407	132262200	RefSeqFE_enhancer_GeneID:110120368	NC_000067.7	132259547	132282046	dbSUPER_MEF_mSE_09739	1793	1793	22499	1	0.0796924
NC_000067.7	132260407	132262200	RefSeqFE_enhancer_GeneID:110120368	NC_000067.7	132261449	132271754	dbSUPER_Spleen_mSE_12577	751	1793	10305	0.418851	0.0728772
NC_000067.7	132260407	132262200	RefSeqFE_enhancer_GeneID:110120368	NC_000067.7	132238277	132284016	dbSUPER_Kidney_mSE_08057	1793	1793	45739	1	0.0392007
NC_000067.7	132260407	132262200	RefSeqFE_enhancer_GeneID:110120368	NC_000067.7	132243204	132270225	dbSUPER_Intestine_mSE_07434	1793	1793	27021	1	0.0663558
NC_000067.7	132260407	132262200	RefSeqFE_enhancer_GeneID:110120368	NC_000067.7	132243638	132262476	dbSUPER_E14.5_Brain_mSE_04508	1793	1793	18838	1	0.09518
NC_000067.7	132260407	132262200	RefSeqFE_enhancer_GeneID:110120368	NC_000067.7	132243710	132319309	dbSUPER_Liver_mSE_08541	1793	1793	75599	1	0.0237172
NC_000067.7	133108405	133111955	RefSeqFE_enhancer_GeneID:110120372	NC_000067.7	133108405	133111955	VISTA_enhancer_positive_mm971	3550	3550	3550	1	1
NC_000067.7	133108405	133111955	RefSeqFE_enhancer_GeneID:110120372	NC_000067.7	133108599	133111801	Ensembl104_promoter:ENSMUSR00000012279	3202	3550	3202	0.901972	1
NC_000067.7	133108405	133111955	RefSeqFE_enhancer_GeneID:110120372	NC_000067.7	133108600	133108800	Ensembl104_CTCF_binding_site:ENSMUSR00000488290	200	3550	200	0.056338	1
NC_000067.7	133108405	133111955	RefSeqFE_enhancer_GeneID:110120372	NC_000067.7	133108821	133109162	ENCODEcCRE_EM10E0450873_promoter	341	3550	341	0.0960563	1
NC_000067.7	133108405	133111955	RefSeqFE_enhancer_GeneID:110120372	NC_000067.7	133109435	133109637	ENCODEcCRE_EM10E0450874_proximal_enhancer	202	3550	202	0.0569014	1
NC_000067.7	133108405	133111955	RefSeqFE_enhancer_GeneID:110120372	NC_000067.7	133109843	133110559	FANTOM5_enhancer_mm10.chr1:133182105-133182821	716	3550	716	0.20169	1
NC_000067.7	133108405	133111955	RefSeqFE_enhancer_GeneID:110120372	NC_000067.7	133109861	133110022	ENCODEcCRE_EM10E0450875_proximal_enhancer	161	3550	161	0.0453521	1
NC_000067.7	133108405	133111955	RefSeqFE_enhancer_GeneID:110120372	NC_000067.7	133110083	133110419	ENCODEcCRE_EM10E0450876_proximal_enhancer	336	3550	336	0.0946479	1
NC_000067.7	133108405	133111955	RefSeqFE_enhancer_GeneID:110120372	NC_000067.7	133110541	133110887	ENCODEcCRE_EM10E0450877_proximal_enhancer	346	3550	346	0.0974648	1
NC_000067.7	133108405	133111955	RefSeqFE_enhancer_GeneID:110120372	NC_000067.7	133110903	133111114	ENCODEcCRE_EM10E0450878_proximal_enhancer	211	3550	211	0.0594366	1
NC_000067.7	133108405	133111955	RefSeqFE_enhancer_GeneID:110120372	NC_000067.7	133111414	133111649	ENCODEcCRE_EM10E0450879_distal_enhancer	235	3550	235	0.0661972	1
NC_000067.7	133108405	133111955	RefSeqFE_enhancer_GeneID:110120372	NC_000067.7	133111472	133111725	FANTOM5_enhancer_mm10.chr1:133183734-133183987	253	3550	253	0.0712676	1
NC_000067.7	133108405	133111955	RefSeqFE_enhancer_GeneID:110120372	NC_000067.7	133108507	133145616	dbSUPER_E14.5_Brain_mSE_04496	3448	3550	37109	0.971268	0.0929155
NC_000067.7	133108405	133111955	RefSeqFE_enhancer_GeneID:110120372	NC_000067.7	133089362	133194157	dbSUPER_Intestine_mSE_07221	3550	3550	104795	1	0.0338757
NC_000067.7	133113717	133117231	RefSeqFE_enhancer_GeneID:110120426	NC_000067.7	133113717	133117231	VISTA_enhancer_positive_mm1460	3514	3514	3514	1	1
NC_000067.7	133113717	133117231	RefSeqFE_enhancer_GeneID:110120426	NC_000067.7	133115231	133115445	ENCODEcCRE_EM10E0450880_distal_enhancer	214	3514	214	0.0608993	1
NC_000067.7	133113717	133117231	RefSeqFE_enhancer_GeneID:110120426	NC_000067.7	133115771	133115997	ENCODEcCRE_EM10E0450881_distal_enhancer	226	3514	226	0.0643142	1
NC_000067.7	133113717	133117231	RefSeqFE_enhancer_GeneID:110120426	NC_000067.7	133116524	133116835	ENCODEcCRE_EM10E0450882_distal_enhancer	311	3514	311	0.0885031	1
NC_000067.7	133113717	133117231	RefSeqFE_enhancer_GeneID:110120426	NC_000067.7	133108507	133145616	dbSUPER_E14.5_Brain_mSE_04496	3514	3514	37109	1	0.094694
NC_000067.7	133113717	133117231	RefSeqFE_enhancer_GeneID:110120426	NC_000067.7	133089362	133194157	dbSUPER_Intestine_mSE_07221	3514	3514	104795	1	0.0335321
NC_000067.7	133273724	133275784	RefSeqFE_enhancer_GeneID:107604629	NC_000067.7	133274401	133276658	Ensembl104_promoter_flanking_region:ENSMUSR00000301181	1383	2060	2257	0.671359	0.61276
NC_000067.7	133273724	133275784	RefSeqFE_enhancer_GeneID:107604629	NC_000067.7	133275447	133275883	FANTOM5_enhancer_mm10.chr1:133347709-133348145	337	2060	436	0.163592	0.772936
NC_000067.7	133273724	133275784	RefSeqFE_enhancer_GeneID:107604629	NC_000067.7	133275600	133275938	ENCODEcCRE_EM10E0450990_distal_enhancer	184	2060	338	0.0893204	0.544379
NC_000067.7	133273724	133278419	RefSeqFE_promoter_GeneID:107604629	NC_000067.7	133274401	133276658	Ensembl104_promoter_flanking_region:ENSMUSR00000301181	2257	4695	2257	0.480724	1
NC_000067.7	133273724	133278419	RefSeqFE_promoter_GeneID:107604629	NC_000067.7	133275447	133275883	FANTOM5_enhancer_mm10.chr1:133347709-133348145	436	4695	436	0.0928647	1
NC_000067.7	133273724	133278419	RefSeqFE_promoter_GeneID:107604629	NC_000067.7	133275600	133275938	ENCODEcCRE_EM10E0450990_distal_enhancer	338	4695	338	0.0719915	1
NC_000067.7	133273724	133278419	RefSeqFE_promoter_GeneID:107604629	NC_000067.7	133275943	133276144	ENCODEcCRE_EM10E0450991_distal_enhancer	201	4695	201	0.0428115	1
NC_000067.7	133273724	133278419	RefSeqFE_promoter_GeneID:107604629	NC_000067.7	133277000	133277800	Ensembl104_enhancer:ENSMUSR00000770392	800	4695	800	0.170394	1
NC_000067.7	133273724	133278419	RefSeqFE_promoter_GeneID:107604629	NC_000067.7	133278400	133280400	Ensembl104_enhancer:ENSMUSR00000488327	19	4695	2000	0.00404686	0.0095
NC_000067.7	133275540	133275761	RefSeqFE_conserved_region_GeneID:107604629	NC_000067.7	133274401	133276658	Ensembl104_promoter_flanking_region:ENSMUSR00000301181	221	221	2257	1	0.0979176
NC_000067.7	133275540	133275761	RefSeqFE_conserved_region_GeneID:107604629	NC_000067.7	133275447	133275883	FANTOM5_enhancer_mm10.chr1:133347709-133348145	221	221	436	1	0.506881
NC_000067.7	133275540	133275761	RefSeqFE_conserved_region_GeneID:107604629	NC_000067.7	133275600	133275938	ENCODEcCRE_EM10E0450990_distal_enhancer	161	221	338	0.728507	0.476331
NC_000067.7	133275540	133275784	RefSeqFE_enhancer_GeneID:107604629	NC_000067.7	133274401	133276658	Ensembl104_promoter_flanking_region:ENSMUSR00000301181	244	244	2257	1	0.108108
NC_000067.7	133275540	133275784	RefSeqFE_enhancer_GeneID:107604629	NC_000067.7	133275447	133275883	FANTOM5_enhancer_mm10.chr1:133347709-133348145	244	244	436	1	0.559633
NC_000067.7	133275540	133275784	RefSeqFE_enhancer_GeneID:107604629	NC_000067.7	133275600	133275938	ENCODEcCRE_EM10E0450990_distal_enhancer	184	244	338	0.754098	0.544379
NC_000067.7	133275553	133275579	RefSeqFE_protein_binding_site_nuclear_factor_I_C_GeneID:107604629	NC_000067.7	133274401	133276658	Ensembl104_promoter_flanking_region:ENSMUSR00000301181	26	26	2257	1	0.0115197
NC_000067.7	133275553	133275579	RefSeqFE_protein_binding_site_nuclear_factor_I_C_GeneID:107604629	NC_000067.7	133275447	133275883	FANTOM5_enhancer_mm10.chr1:133347709-133348145	26	26	436	1	0.059633
NC_000067.7	133275578	133275604	RefSeqFE_protein_binding_site_nuclear_factor_I_C_GeneID:107604629	NC_000067.7	133274401	133276658	Ensembl104_promoter_flanking_region:ENSMUSR00000301181	26	26	2257	1	0.0115197
NC_000067.7	133275578	133275604	RefSeqFE_protein_binding_site_nuclear_factor_I_C_GeneID:107604629	NC_000067.7	133275447	133275883	FANTOM5_enhancer_mm10.chr1:133347709-133348145	26	26	436	1	0.059633
NC_000067.7	133275578	133275604	RefSeqFE_protein_binding_site_nuclear_factor_I_C_GeneID:107604629	NC_000067.7	133275600	133275938	ENCODEcCRE_EM10E0450990_distal_enhancer	4	26	338	0.153846	0.0118343
NC_000067.7	133275650	133275672	RefSeqFE_protein_binding_site_nuclear_factor_I_C_GeneID:107604629	NC_000067.7	133274401	133276658	Ensembl104_promoter_flanking_region:ENSMUSR00000301181	22	22	2257	1	0.00974745
NC_000067.7	133275650	133275672	RefSeqFE_protein_binding_site_nuclear_factor_I_C_GeneID:107604629	NC_000067.7	133275447	133275883	FANTOM5_enhancer_mm10.chr1:133347709-133348145	22	22	436	1	0.0504587
NC_000067.7	133275650	133275672	RefSeqFE_protein_binding_site_nuclear_factor_I_C_GeneID:107604629	NC_000067.7	133275600	133275938	ENCODEcCRE_EM10E0450990_distal_enhancer	22	22	338	1	0.0650888
NC_000067.7	133275669	133275695	RefSeqFE_protein_binding_site_Sp1/Sp3_transcription_factors_GeneID:107604629	NC_000067.7	133274401	133276658	Ensembl104_promoter_flanking_region:ENSMUSR00000301181	26	26	2257	1	0.0115197
NC_000067.7	133275669	133275695	RefSeqFE_protein_binding_site_Sp1/Sp3_transcription_factors_GeneID:107604629	NC_000067.7	133275447	133275883	FANTOM5_enhancer_mm10.chr1:133347709-133348145	26	26	436	1	0.059633
NC_000067.7	133275669	133275695	RefSeqFE_protein_binding_site_Sp1/Sp3_transcription_factors_GeneID:107604629	NC_000067.7	133275600	133275938	ENCODEcCRE_EM10E0450990_distal_enhancer	26	26	338	1	0.0769231
NC_000067.7	133275688	133275718	RefSeqFE_protein_binding_site_activating_transcription_factor_2_GeneID:107604629	NC_000067.7	133274401	133276658	Ensembl104_promoter_flanking_region:ENSMUSR00000301181	30	30	2257	1	0.013292
NC_000067.7	133275688	133275718	RefSeqFE_protein_binding_site_activating_transcription_factor_2_GeneID:107604629	NC_000067.7	133275447	133275883	FANTOM5_enhancer_mm10.chr1:133347709-133348145	30	30	436	1	0.0688073
NC_000067.7	133275688	133275718	RefSeqFE_protein_binding_site_activating_transcription_factor_2_GeneID:107604629	NC_000067.7	133275600	133275938	ENCODEcCRE_EM10E0450990_distal_enhancer	30	30	338	1	0.0887574
NC_000067.7	133275688	133275718	RefSeqFE_protein_binding_site_nuclear_factor_of_kappa_light_polypeptide_gene_enhancer_in_B_cells_2_p49/p100_v-rel_reticuloendotheliosis_viral_oncogene_homolog_A_(avian)_GeneID:107604629	NC_000067.7	133274401	133276658	Ensembl104_promoter_flanking_region:ENSMUSR00000301181	30	30	2257	1	0.013292
NC_000067.7	133275688	133275718	RefSeqFE_protein_binding_site_nuclear_factor_of_kappa_light_polypeptide_gene_enhancer_in_B_cells_2_p49/p100_v-rel_reticuloendotheliosis_viral_oncogene_homolog_A_(avian)_GeneID:107604629	NC_000067.7	133275447	133275883	FANTOM5_enhancer_mm10.chr1:133347709-133348145	30	30	436	1	0.0688073
[truncated: 7,447 more rows]

## Sheet: S5F_non-overlapped_features
Supplemental Table S5F. Human AR 109.20201120 and mouse AR 109 RefSeq Functional Element features that lack overlap with the other gene regulatory datasets.
[truncated: 2,414 more rows]
